# Supplementary material for: Comparative Transcriptomics Reveals the microRNA-Mediated Immune Response of Large Yellow Croaker (Larimichthys crocea) to Pseudomonas plecoglossicida Infection
Source: MDPI journal article supplement (doi:10.3390/fishes8010010), 2022-12-23
Supplement: s1 [file s1]

**Table S3. The search results of GACUUGGUCAUAGCUCCUCAGU in miRbase**

| Accession    | MiRNA ID         | Query | Query | Subject | Subject | Strand | Score | Evalue |
|--------------|------------------|-------|-------|---------|---------|--------|-------|--------|
|              |                  | start | end   | start   | end     |        |       |        |
| MIMAT0032665 | ssa-miR-7132a-5p | 1     | 22    | 1       | 22      | +      | 101   | 0.005  |
| MIMAT0032732 | ssa-miR-7132b-5p | 1     | 21    | 1       | 21      | +      | 96    | 0.013  |
| MIMAT0042215 | abu-miR-7132a-5p | 1     | 21    | 1       | 21      | +      | 96    | 0.013  |
| MIMAT0042441 | mze-miR-7132a-5p | 1     | 21    | 1       | 21      | +      | 96    | 0.013  |
| MIMAT0042623 | nbr-miR-7132a-5p | 1     | 21    | 1       | 21      | +      | 96    | 0.013  |
| MIMAT0042812 | oni-miR-7132a-5p | 1     | 21    | 1       | 21      | +      | 96    | 0.013  |
| MIMAT0043008 | pnv-miR-7132a-5p | 1     | 21    | 1       | 21      | +      | 96    | 0.013  |
| MIMAT0044250 | gmo-miR-7132a-5p | 1     | 21    | 1       | 21      | +      | 96    | 0.013  |
| MIMAT0042219 | abu-miR-7132b-5p | 1     | 22    | 1       | 22      | +      | 92    | 0.027  |
| MIMAT0042437 | mze-miR-7132b-5p | 1     | 22    | 1       | 22      | +      | 92    | 0.027  |
| MIMAT0042632 | nbr-miR-7132b    | 1     | 22    | 1       | 22      | +      | 92    | 0.027  |
| MIMAT0042821 | oni-miR-7132b-5p | 1     | 22    | 1       | 22      | +      | 92    | 0.027  |
| MIMAT0043676 | eel-miR-7132-5p  | 1     | 22    | 1       | 22      | +      | 92    | 0.027  |
| MIMAT0048669 | dre-miR-7132-5p  | 1     | 22    | 1       | 22      | +      | 92    | 0.027  |
| MIMAT0044139 | gmo-miR-7132b-5p | 1     | 21    | 1       | 21      | +      | 87    | 0.071  |
