# Supplementary material for: Comparative Transcriptomics Reveals the microRNA-Mediated Immune Response of Large Yellow Croaker (Larimichthys crocea) to Pseudomonas plecoglossicida Infection
Source: MDPI journal article supplement (doi:10.3390/fishes8010010), 2022-12-23
Supplement: s1 [file s1]

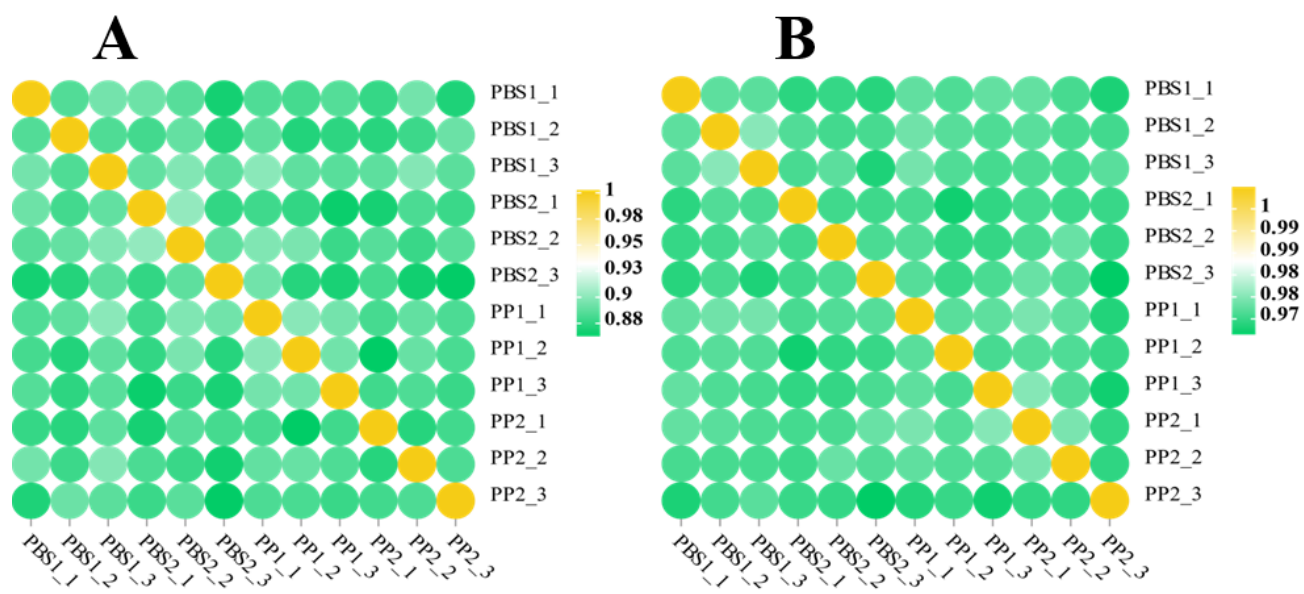

**Figure S1. Pearson correlation coefficients of sRNA-seq samples (A) and RNA-seq samples (B).** The color scale represents correlation coefficient.
