# Supplementary material for: Comparative Transcriptomics Reveals the microRNA-Mediated Immune Response of Large Yellow Croaker (Larimichthys crocea) to Pseudomonas plecoglossicida Infection
Source: MDPI journal article supplement (doi:10.3390/fishes8010010), 2022-12-23
Supplement: s1 [file s1]

Archive with 19 entries (19 files):
- Figure S1.pdf
- Table S1.xlsx
- Table S10.xlsx
- Table S11.xlsx
- Table S12.xlsx
- Table S13.xlsx
- Table S14.xlsx
- Table S15.xlsx
- Table S16.xlsx
- Table S17.xlsx
- Table S18.xlsx
- Table S2.xlsx
- Table S3.pdf
- Table S4.xlsx
- Table S5.xlsx
- Table S6.xlsx
- Table S7.xlsx
- Table S8.xlsx
- Table S9.xlsx
