# Supplementary material for: Comparative Transcriptomics Reveals the microRNA-Mediated Immune Response of Large Yellow Croaker (Larimichthys crocea) to Pseudomonas plecoglossicida Infection
Source: MDPI journal article supplement (doi:10.3390/fishes8010010), 2022-12-23
Supplement: s1 [file s1 › Table S1.xlsx]

## Sheet: Novel miRNAs
Table S1 Oview information of novel miRNAs and known miRNAs
miRNA ID	miRNA sequence	miRNA length	Pre-miRNA ID	Pre-miRNA sequence	pre-miRNA length	pre position	score
lcr-miR-N1	ucuagucugggaaugccucgg	21	NC_040011.1_1072	ugggcagaccuagaacucacuggugguacuacauagcccaucuagucugggaaugccucgg	61	NC_040011.1(-):7594612-7594673	2
lcr-miR-N10	ucuguugcuauagaacuguugc	22	NC_040011.1_1415	ucuguugcuauagaacuguugcuaguagcaacaguucuauagcaacagugu	51	NC_040011.1(-):27879037-27879088	5.5
lcr-miR-N100	ugauaauaugucuuguaguagu	22	NC_040016.1_5490	cuacaagagauaucaucauuacuuaggccuuaguaaugauaauaugucuuguaguagu	58	NC_040016.1(-):7909784-7909842	4.7
lcr-miR-N101	gacuccgguggaaugaaggau	21	NC_040016.1_5498	ucuucaaaccacugaaaucugauuggcacuuuacacagacuccgguggaaugaaggau	58	NC_040016.1(-):8070739-8070797	428.6
lcr-miR-N102	ugcaagaaguaaauagacaccu	22	NC_040016.1_5525	ugcaagaaguaaauagacaccuuuaauuugaauuugaaugaaggugucuaauuacuucuugca	63	NC_040016.1(-):8541578-8541641	5.2
lcr-miR-N103	ugcacugcacagccaacucuga	22	NC_040016.1_5535	ugcacugcacagccaacucugacauauuucuuuuuuugauucugugagaguuggcugugcagugcaaa	68	NC_040016.1(-):8551486-8551554	5.9
lcr-miR-N104	aggaggaggaggaggagg	18	NC_040016.1_5554	aggaggaggaggaggaggcacaauuccaggaaaguuauauuuucucaaucaguuuccaggaauuguguuucucgcucaccucuugc	86	NC_040016.1(-):8959167-8959253	5.2
lcr-miR-N105	uucaacugcaguugaagaau	20	NC_040016.1_5561	ucuucaaacgcaguugugagaauuugccuuauuucuucaacugcaguugaagaau	55	NC_040016.1(-):9104318-9104373	6.8
lcr-miR-N106	ugcaggaaguaaauagacaccu	22	NC_040016.1_5655	ugcaggaaguaaauagacaccuuuaauuuaauuugaaggaaggugucuauuuacuuauugca	62	NC_040016.1(-):11327156-11327218	5.6
lcr-miR-N107	gcauuggugguucagugg	18	NC_040016.1_5692	gcauuggugguucagugguagaauucuugccuuccacacaggaggccugguuucgauucccggccaaugcaca	73	NC_040016.1(-):13664649-13664722	0.7
lcr-miR-N108	aagccagaagauuugacaguuu	22	NC_040016.1_5718	aagccagaagauuugacaguuuuauuuaugaauaaaacugucaaaucuucuggcuuua	58	NC_040016.1(-):14649291-14649349	0.1
lcr-miR-N109	acauuguaugacagcuggagcuc	23	NC_040016.1_5751	acauuguaugacagcuggagcucauguguugcugaaaugaagggggugaaaggcguuccgguguugugauuaugaag	77	NC_040016.1(-):17799568-17799645	1.7
lcr-miR-N11	cggcugacugacugacug	18	NC_040011.1_1422	cucaguccuccagucuucagcuccacagacggccccccggcugacugacugacug	55	NC_040011.1(-):28085536-28085591	0.5
lcr-miR-N110	cguaaugagcugcugcagugu	21	NC_040016.1_5802	accacagcagcucauguuguucacuacaugagcguaaugagcugcugcagugu	53	NC_040016.1(-):19677952-19678005	1.6
lcr-miR-N111	uguguuccuguuuuaaccgugu	22	NC_040016.1_5805	uguguuccuguuuuaaccgugugaguuuucccacgguuaaaacaggaacauuaagug	57	NC_040016.1(-):19746595-19746652	4.4
lcr-miR-N112	ugccaaaccagucgacacagg	21	NC_040016.1_5863	ugccaaaccagucgacacaggauggcugacugcauccugugucgacugguuuuggcagc	59	NC_040016.1(-):23148308-23148367	6.1
lcr-miR-N113	ucagucucagacagucucag	20	NC_040016.1_5891	gagacagucucagacucagagacagucucagacagucucagucucagacagucucag	57	NC_040016.1(-):23355542-23355599	0
lcr-miR-N114	aacagagcuccacaccaagc	20	NC_040016.1_6033	aacagagcuccacaccaagccaggccaagccuggcuugguguggagcucuguugc	55	NC_040016.1(-):26668523-26668578	0.6
lcr-miR-N115	uuagucgacuaaucggaucau	21	NC_040017.1_6072	uauccgauuagucgacuaaucacgauuauuuuuucgauuagucgacuaaucggaucau	58	NC_040017.1(+):2279562-2279620	45.7
lcr-miR-N116	caugucacaguaauaacguuau	22	NC_040017.1_6102	aacgcguuauuacugugucaugucauaauuacugugucaugucacaguaauaacguuau	59	NC_040017.1(+):3313577-3313636	0.8
lcr-miR-N117	guguuugaaucuggaccuc	19	NC_040017.1_6106	guguuugaaucuggaccucaccugaacucaccuggucugagucuacacucaggugagguccagauccaucagcacug	77	NC_040017.1(+):3330523-3330600	0.2
lcr-miR-N118	gagcaacuaccaaaugaaccuu	22	NC_040017.1_6179	agguccauuuagcagcuguuuugaucaaaucaaggcuccggagcaacuaccaaaugaaccuu	62	NC_040017.1(+):5704859-5704921	63.9
lcr-miR-N119	cagcuuacagacugcuguugc	21	NC_040017.1_6262	cagcuuacagacugcuguugccguacaaauuuaaacagccaacaccagucugauaagcuag	61	NC_040017.1(+):10939282-10939343	46.7
lcr-miR-N12	cuauuuuguggguuuucu	18	NC_040011.1_1623	cuauuuuguggguuuucuuucugaacuggggugggucacuugcccgagcgguccggagggcaaaacacgagaaggau	77	NC_040011.1(-):30844347-30844424	4.7
lcr-miR-N120	acuuaugcggcacguucaugu	21	NC_040017.1_6340	acuuaugcggcacguucauguguugagauucauaccaugacacuugcuguaucauguaa	59	NC_040017.1(+):14742789-14742848	96
lcr-miR-N121	acuaucucucuucuguuuacau	22	NC_040017.1_6383	uguaaacagaagagagauaguuggggguugcccaacuaucucucuucuguuuacau	56	NC_040017.1(+):16556415-16556471	19.8
lcr-miR-N122	gaaccaaugaauaaaaacagaa	22	NC_040017.1_6533	cugucuuuauucauuggaucugauccagcacaaacagaaccaaugaauaaaaacagaa	58	NC_040017.1(+):20655775-20655833	10.5
lcr-miR-N123	uuguggacuguaaagagaca	20	NC_040017.1_6541	ucucuuuacaguccacaagcccucucuccacucaugcuuuguggacuguaaagagaca	58	NC_040017.1(+):20881264-20881322	2.5
lcr-miR-N124	ucuggaagagcauugauaaucu	22	NC_040017.1_6546	ucuggaagagcauugauaaucuauugaauagauuaucagugcucuuccagaca	53	NC_040017.1(+):20980166-20980219	532
lcr-miR-N125	ucugcuccaugucucugacgacu	23	NC_040017.1_6572	ucugcuccaugucucugacgacugagcuguaucgucucagagccaagagcagg	53	NC_040017.1(+):21995106-21995159	37.8
lcr-miR-N126	uuaucagcaaagugacccacucu	23	NC_040017.1_6591	cgugggucgcugcugauacaguacaaugacugccugugccuuuaucagcaaagugacccacucu	64	NC_040017.1(+):23305552-23305616	13.8
lcr-miR-N127	uuucuaauauuguggcccucu	21	NC_040017.1_6594	uuucuaauauuguggcccucucauguaugcaaaugaaguggccaaaauacuagaaaca	58	NC_040017.1(+):23485086-23485144	4.9
lcr-miR-N128	uuugaacaggugaacuaaacuc	22	NC_040017.1_6738	uuugaacaggugaacuaaacucugacagaguuuaguucaccuguucaaacu	51	NC_040017.1(+):29210196-29210247	71.2
lcr-miR-N129	ucucuguggaccccugugcaau	22	NC_040017.1_6914	ugcacgguguucacacacaaacagcagacauguuucucuguggaccccugugcaau	56	NC_040017.1(-):9055358-9055414	0.7
lcr-miR-N13	uacuacguaggcaaaacacucu	22	NC_040011.1_1630	uuguguuuugccuacguaguaaauaaacgauacauuuauuuacuacguaggcaaaacacucu	62	NC_040011.1(-):31467988-31468050	20.3
lcr-miR-N130	uguaccacuaggagucgcaca	21	NC_040017.1_7031	uguaccacuaggagucgcacauacucccaaacacaguaugugcgacuccuugugguacaau	61	NC_040017.1(-):15384557-15384618	5.6
lcr-miR-N131	acuaucucucuucuguuuacau	22	NC_040017.1_7044	uguaaacagaagagagauaguugggcaacccccaacuaucucucuucuguuuacau	56	NC_040017.1(-):16556413-16556469	20.7
lcr-miR-N132	uuguggacuguaaagagacagu	22	NC_040017.1_7134	uugucucuuuacaguccacaaagcaugaguggagagagggcuuguggacuguaaagagacagu	63	NC_040017.1(-):20881259-20881322	2.5
lcr-miR-N133	cucuuugcuauuuccuccagacu	23	NC_040017.1_7211	cucuuugcuauuuccuccagacuuguucaggagguaauucacagaggggg	50	NC_040017.1(-):26201352-26201402	1.3
lcr-miR-N134	cucuuugcuauuuccuccagacu	23	NC_040017.1_7213	cucuuugcuauuuccuccagacuuguucaggagguacuucacagaggggg	50	NC_040017.1(-):26203997-26204047	1.5
lcr-miR-N135	auucacaucacagacggagagu	22	NC_040017.1_7267	auucacaucacagacggagagucgucuccucgugaucugaacuuucugcuguuggugugagca	63	NC_040017.1(-):27689726-27689789	115.9
lcr-miR-N136	uuggacgagaggugaaacaucu	22	NC_040017.1_7276	acguuucaucucucguugaagaacugaagaaaccucuuggacgagaggugaaacaucu	58	NC_040017.1(-):28658160-28658218	5.4
lcr-miR-N137	ucgccacgugcucauauucagga	23	NC_040017.1_7278	ugaauaucagcacacugugauuauucaacagaaucgccacgugcucauauucagga	56	NC_040017.1(-):28746312-28746368	121.1
lcr-miR-N138	uuguguguguguguguguua	20	NC_040018.1_7292	uuguguguguguguguguuaaaagcaaggcaacaaaaacaaau	43	NC_040018.1(+):650969-651012	0.3
lcr-miR-N139	aggaccgcucgacuuagacugg	22	NC_040018.1_7416	aggaccgcucgacuuagacuggacuguauaaaggggacuuacacuucaucccagucgagcggcucuuu	68	NC_040018.1(+):9839777-9839845	4.9
lcr-miR-N14	uacuacguaggcaaaacacucu	22	NC_040011.1_1632	uuguguuuugccuacguaguaaaaaaacgauacauuauuuacuacguaggcaaaacacucu	61	NC_040011.1(-):31481739-31481800	19.9
lcr-miR-N140	cuuucgguuaucuagcuuuaug	22	NC_040018.1_7506	cuuucgguuaucuagcuuuaugauggaugauuaacacucauacagcuagauaaccaaagacag	63	NC_040018.1(+):15088802-15088865	8.9
lcr-miR-N141	uuuuuguggcacacagcagga	21	NC_040018.1_7549	uuuuuguggcacacagcaggacauguagacauugaugugucagcuguugacaugaaaaca	60	NC_040018.1(+):17756758-17756818	0.5
lcr-miR-N142	uagacaucuuuacuguagaca	21	NC_040018.1_7554	uagacaucuuuacuguagacauacugucuguguguuugcaguaaauaugucuacu	55	NC_040018.1(+):17779906-17779961	1.7
lcr-miR-N143	uuucuaauauuguggcccucu	21	NC_040018.1_7564	uuucuaauauuguggcccucucauguauauaaauggugugggcaaaauguuauaaaca	58	NC_040018.1(+):17938734-17938792	5.2
lcr-miR-N144	agccccaguugucagcaa	18	NC_040018.1_7566	agccccaguugucagcaagcuugcugacgccgcguuuccugacaacugggggugc	55	NC_040018.1(+):17941869-17941924	0.2
lcr-miR-N145	uguauugugugcaguaauuuca	22	NC_040018.1_7651	aaauuacugcauacaucacacaaauaauguuauuguguauugugugcaguaauuuca	57	NC_040018.1(+):27295357-27295414	4
lcr-miR-N146	uguauugugugcaguaauuuca	22	NC_040018.1_7665	aauuacugcauacaucaccaaauaauguuauuguguauugugugcaguaauuuca	55	NC_040018.1(+):27305477-27305532	36.5
lcr-miR-N147	agcagaaacgucuccugaagc	21	NC_040018.1_7798	agcagaaacgucuccugaagcucgacgucacgucgagcuucaggagacguuucugcuuc	59	NC_040018.1(+):31249648-31249707	6.4
lcr-miR-N148	uccucugcagcggguucauccu	22	NC_040018.1_7837	guucauccucugcagagugugcaacagguucauccucugcagcggguucauccu	54	NC_040018.1(+):32408996-32409050	5.5
lcr-miR-N149	uccucugcagcggguucauccu	22	NC_040018.1_7838	uccucugcagcggguucauccucugcagagcgugcagcggguucauccucugcagcggguucau	64	NC_040018.1(+):32409028-32409092	5.2
lcr-miR-N15	ugggacaaugacagcaaauuc	21	NC_040011.1_1634	auuugcuuucauuguccaaacucaacuuuuaucguugggacaaugacagcaaauuc	56	NC_040011.1(-):31562409-31562465	4.2
lcr-miR-N150	ugugucgucgggugucuuca	20	NC_040018.1_7843	ugaagacaugugacgucacgugucuucacaugacgucaugugucgucgggugucuuca	58	NC_040018.1(+):32535322-32535380	1.9
lcr-miR-N151	gaagcagugcacugucaaca	20	NC_040018.1_7847	gaagcagugcacugucaacauuguuuucagugagggcggggugcugcugac	51	NC_040018.1(+):32807253-32807304	2.1
lcr-miR-N152	gaacgcugcguguugugugugu	22	NC_040018.1_7879	acagcaacauaccguguguucaggagagggaacgcugcguguugugugugu	51	NC_040018.1(+):33361324-33361375	1
lcr-miR-N153	gaaaguugaacgugauugguca	22	NC_040018.1_7891	accaaucacaugcaguuuucaauuaaaaaaguugaaaguuugaaaguugaacgugauugguca	63	NC_040018.1(+):33695358-33695421	39.4
lcr-miR-N154	cccuaucacgauuagcauuaacu	23	NC_040018.1_8031	auaaugcuaacauguuaggugucugcucaugaaccaccccuaucacgauuagcauuaacu	60	NC_040018.1(-):9605423-9605483	16.6
lcr-miR-N155	ggauagagaaaggaacauuu	20	NC_040018.1_8136	aaguucuuacuccuauucacacgucucuugugcuuuugucacaagugacagggauagagaaaggaacauuu	71	NC_040018.1(-):14040741-14040812	1.6
lcr-miR-N156	ugggcgauugcuuggaccccaga	23	NC_040018.1_8226	ggggguccuaucaauggcccuaucaauugaucgugggcgauugcuuggaccccaga	56	NC_040018.1(-):17346107-17346163	1.7
lcr-miR-N157	ugaacuuuggaagcucugcuaa	22	NC_040018.1_8336	cuagcggaguuuccaaaguucaacucucuugaacuuuggaagcucugcuaa	51	NC_040018.1(-):24650932-24650983	5.4
lcr-miR-N158	ugugcuguuguacugaauauca	22	NC_040018.1_8338	ugugcuguuguacugaauaucagcacgcuguauucgguaugaccaaauuacagccaugcugauauucaguauaacggcacaac	83	NC_040018.1(-):24689586-24689669	5.7
lcr-miR-N159	uuugugucuuuguggugguuuugu	24	NC_040018.1_8359	uuugugucuuuguggugguuuuguggguuuaaaaacagauaaaaacagcacaacgacgcacaac	64	NC_040018.1(-):27223844-27223908	0
lcr-miR-N16	gagucugugucagugauca	19	NC_040011.1_1656	gucagcgaucagagucugugucagugaucagagucugugucagugauca	49	NC_040011.1(-):33029764-33029813	0.7
lcr-miR-N160	uguuucggcuuaacgggugacc	22	NC_040018.1_8414	gucgcucguuaaagcgaaacacuagucuaugguauauuagguguuucggcuuaacgggugacc	63	NC_040018.1(-):29598561-29598624	18.3
lcr-miR-N161	ucuugauuaguagcgcga	18	NC_040018.1_8421	cugcuacuaaucgagagcaaauauuggagguacaaucgucaggugauaauuguaccuccaauauuugcuccaauauuugcucuugauuaguagcgcga	98	NC_040018.1(-):30396390-30396488	5.6
lcr-miR-N162	ccugaugauuguaccuccaa	20	NC_040018.1_8425	ggagguacaaucaucaccugaugaucgucaccugaugauuguaccuccaa	50	NC_040018.1(-):30400066-30400116	5.3
lcr-miR-N163	ucugcugcgcugaauggaacaga	23	NC_040018.1_8434	gguuccauucagagucagagugcugccgugcugcauguucugcugcgcugaauggaacaga	61	NC_040018.1(-):30424239-30424300	5.3
lcr-miR-N164	agcagaaacgucuccugaagc	21	NC_040018.1_8493	agcagaaacgucuccugaagcucgacgugacgucgagcuucaggagacguuucugcuuc	59	NC_040018.1(-):31249645-31249704	6.4
lcr-miR-N165	ugucguggucuugaugaug	19	NC_040018.1_8538	ugauccgugacguggucuugaugaugauccgggucgugguccgugacguggucuugaugaugauccgggucgugguccgugucguggucuugaugaug	98	NC_040018.1(-):32551542-32551640	5.5
lcr-miR-N166	aaccgacuggagggacuaga	20	NC_040019.1_8586	aaccgacuggagggacuagauaccccgucuaggaacgccucuggauccuccaggaggagcu	61	NC_040019.1(+):1390378-1390439	5.2
lcr-miR-N167	cggcucugggucggcuug	18	NC_040019.1_8876	cggcucugggucggcuuggaagggggcgaagguggagggcgagcuuuacagcgcccgcccgcccggaccucgccguuucccagggccg	88	NC_040019.1(+):12536433-12536521	1.8
lcr-miR-N168	auccgugacgacguuucaacu	21	NC_040019.1_8888	auccgugacgacguuucaacucucaaaacuaucguacgaaacgucuucacggguc	55	NC_040019.1(+):13140735-13140790	5.5
lcr-miR-N169	uuagcacgcuagcacuguuag	21	NC_040019.1_9260	agcacguuagcacuguuagcacugcugauuauauagcauaauguuagcacgcuagcacuguuag	64	NC_040019.1(-):12872777-12872841	0.1
lcr-miR-N17	gagucugugucagugauca	19	NC_040011.1_1657	gagucugugucagugaucagagucuguggucagugaucaaagucugugucagugaucagagucuguggucagugaucagagucug	85	NC_040011.1(-):33029814-33029899	0.9
lcr-miR-N170	uugaaacgucgucacggaucca	22	NC_040019.1_9276	gacccgugaagacguuucguacgauaguuuugagaguugaaacgucgucacggaucca	58	NC_040019.1(-):13140731-13140789	15.1
lcr-miR-N171	guuccagcacgugaacagcga	21	NC_040019.1_9280	gacuguccgcguguccgggaucguguuagcgucucucauguuccagcacgugaacagcga	60	NC_040019.1(-):13295165-13295225	0.1
lcr-miR-N172	uugucaugguuacggcugcuga	22	NC_040019.1_9301	uugucaugguuacggcugcugaguagccauguuuccaacagcugccguaaccaugacaacc	61	NC_040019.1(-):13619766-13619827	18.1
lcr-miR-N173	auucuuguucaacuguuacugagc	24	NC_040020.1_10070	auucuuguucaacuguuacugagcaagaggaaauggguggggcaguugaacaauaauaa	59	NC_040020.1(+):31758961-31759020	2.8
lcr-miR-N174	gguuaauucauuaaacgagc	20	NC_040020.1_10138	gguuaauucauuaaacgagcggcucggucuuagccgcucguuuaaugaauuaacccg	57	NC_040020.1(+):35582151-35582208	2.5
lcr-miR-N175	guucaaaucucgguggaa	18	NC_040020.1_10165	guaaugguuagcacucuggacucugaauccagcgauccgaguucaaaucucgguggaa	58	NC_040020.1(+):37178276-37178334	3.7
lcr-miR-N176	uucuguaaggauuuuauuguga	22	NC_040020.1_10334	acaguaaaagucuucuagcacuuaaucauuuuuucguucuguaaggauuuuauuguga	58	NC_040020.1(-):4471289-4471347	3.7
lcr-miR-N177	ugaggagcuuugaccaagucc	21	NC_040020.1_10452	acuuguucaaaacgccuccgagucgcauucaucugcugaggagcuuugaccaagucc	57	NC_040020.1(-):7540750-7540807	532.7
lcr-miR-N178	ucaggucaugccuacagaacga	22	NC_040020.1_10492	auucuguagccaugcgccacugagggagccucaggucaugccuacagaacga	52	NC_040020.1(-):9165173-9165225	5
lcr-miR-N179	aucuggauuguggcucugcug	21	NC_040020.1_10613	aucuggauuguggcucugcuguuucuguaggacagauaauggaguccucagacagaugu	59	NC_040020.1(-):15893848-15893907	1
lcr-miR-N18	ucugggucugccucugggucu	21	NC_040011.1_1674	aucccgaggcauucccaggccagaugggcuauauaaucccucaagcaaguucugggucugccucugggucu	71	NC_040011.1(-):35277660-35277731	5.4
lcr-miR-N180	ugaccgaccugugaaccgcagug	23	NC_040020.1_10634	uccgguucacguucuggucacucaaacagugaccgaccugugaaccgcagug	52	NC_040020.1(-):17538250-17538302	9.9
lcr-miR-N181	caagaaguaaauagacaccu	20	NC_040020.1_10645	caagaaguaaauagacaccuuuauucaaauucaauauuuacuucuugca	49	NC_040020.1(-):18223978-18224027	1.7
lcr-miR-N182	acacaccauaacacauacugu	21	NC_040020.1_10695	acacaccauaacacauacuguacacuuaccguacaguguguguauguuagugugucucc	59	NC_040020.1(-):20502373-20502432	4.7
lcr-miR-N183	ugaggagcuuugaccaagucc	21	NC_040020.1_10880	acuuguuccaaacgccucagagucacauucaucugcugaggagcuuugaccaagucc	57	NC_040020.1(-):28512741-28512798	4.5
lcr-miR-N184	gcugcagucgagacaagu	18	NC_040020.1_10888	uugucagagccacagcagagcugcagucgagacaagu	37	NC_040020.1(-):28571468-28571505	0.2
lcr-miR-N185	uguguguguuuugucucaga	20	NC_040020.1_10949	uguguguguuuugucucagagggaagugcgguucugguucgcgacaggaggagcaggauucugucugagucggcgacuggcg	82	NC_040020.1(-):31243173-31243255	0.4
lcr-miR-N186	gguuaauucauuaaacgagc	20	NC_040020.1_11037	gguuaauucauuaaacgagcggcuaagaccgagccgcucguuuaaugaauuaacccg	57	NC_040020.1(-):35582148-35582205	2.7
lcr-miR-N187	ugguggacuccucagcugaugu	22	NC_040020.1_11063	ugguggacuccucagcugauguguccuccucagcugauguguccuccucagcugguguguccucuucagcugguguguccgccucagcugg	91	NC_040020.1(-):37367154-37367245	5.4
lcr-miR-N188	ugguggacuccucagcugaugu	22	NC_040020.1_11064	uucggcugcuuccucauccacugaugucucagcagcagguguugcuucagcaguggugguggacuccucagcugaugu	78	NC_040020.1(-):37367223-37367301	5.3
lcr-miR-N189	guguggcuggcccccgucg	19	NC_040020.1_9454	guguggcuggcccccgucguggcaccgcaugaagucgggcgggcugcacgg	51	NC_040020.1(+):7237821-7237872	1.6
lcr-miR-N19	uucaaaggcucugugauguacu	22	NC_040011.1_1762	uucaucacaggcuuugagugaauaauuagauuaauuauucaaaggcucugugauguacu	59	NC_040011.1(-):38300400-38300459	10
lcr-miR-N190	ggacuuggucaaagcuccucagc	23	NC_040020.1_9472	ggacuuggucaaagcuccucagcagaugaaugcgacucggaggcguuuugaacaaguuca	60	NC_040020.1(+):7540751-7540811	229.4
lcr-miR-N191	gagcagaggcuguucuca	18	NC_040020.1_9833	aggacaggcucccagccgaggacaggcucccaggcgagcagaggcuguucuca	53	NC_040020.1(+):24250099-24250152	0
lcr-miR-N192	ucgagaugucagaauggucuga	22	NC_040020.1_9950	ucgagaugucagaauggucugacguugucagugucagaccauucugacaucuc	53	NC_040020.1(+):27575862-27575915	5.5
lcr-miR-N193	ggacuuggucaaagcuccucagc	23	NC_040020.1_9987	ggacuuggucaaagcuccucagcagaugaaugugacucugaggcguuuggaacaaguuca	60	NC_040020.1(+):28512742-28512802	277.2
lcr-miR-N194	uggcggugagcucagagcgacg	22	NC_040021.1_11110	uggcggugagcucagagcgacggguacccgucgcucugagcucacugccaagcuga	56	NC_040021.1(+):559757-559813	6.4
lcr-miR-N195	aaagugcuuacagugaag	18	NC_040021.1_11160	aaagugcuuacagugaagguggaaacucaccucuaauguguagcacccacc	51	NC_040021.1(+):3007315-3007366	1.4
lcr-miR-N196	uguauugugugcaguaauuuca	22	NC_040021.1_11199	aauuacugcauacaucaccaaauauguuauuguguauugugugcaguaauuuca	54	NC_040021.1(+):3529566-3529620	35.1
lcr-miR-N197	gggggauuagcucaaaugg	19	NC_040021.1_11273	cuucggguaucaaccuucguuuacggucacuuuauagcgcgaugccgugcauuauaggguacgacgggggauuagcucaaaugg	84	NC_040021.1(+):7345431-7345515	0.7
lcr-miR-N198	gggggauuagcucaaaugg	19	NC_040021.1_11281	auugagaaaucaugaccuaugacgucagagaaacaaaggcaucaugggggauuagcucaaaugg	64	NC_040021.1(+):7362738-7362802	3
lcr-miR-N199	uuuugagacaucugccacag	20	NC_040021.1_11301	guggcagaugucucaaaagaggauccucuuuugagacaucugccacag	48	NC_040021.1(+):8743070-8743118	2.7
lcr-miR-N2	acagcgugaugauauucagucc	22	NC_040011.1_1075	auacugaauaucggcauggcuuuggucguaguuaaucacagcgugaugauauucagucc	59	NC_040011.1(-):7810756-7810815	5.2
lcr-miR-N20	uuucuaggcuuccuguguagu	21	NC_040011.1_260	uuucuaggcuuccuguguaguccauauccacugacuacacaggaagccuagaaaca	56	NC_040011.1(+):14703524-14703580	21
lcr-miR-N200	uccucaaagauucuggaga	19	NC_040021.1_11370	uccagagucuuugagaauauuuccgaaugaauguccucaaagauucuggaga	52	NC_040021.1(+):11944823-11944875	1.9
lcr-miR-N201	gagagccuccuucugaca	18	NC_040021.1_11376	ucggauaccccuucacucuacaaugagugagagccuccuucugaca	46	NC_040021.1(+):11992641-11992687	4.6
lcr-miR-N202	gauuugucuguuaguggagc	20	NC_040021.1_11461	gauuugucuguuaguggagcagugacacaguuacguuauuucuaaauaguccaaugacguuccuuguuacuguuucaucagggauacag	89	NC_040021.1(+):13733991-13734080	0
lcr-miR-N203	uaacaagguuuccguaggu	19	NC_040021.1_11552	uaacaagguuuccguaggugaaccugaggaaaguguauuauc	42	NC_040021.1(+):19738841-19738883	0.4
lcr-miR-N204	uccucugguccacuggucc	19	NC_040021.1_11572	uccucugguccacugguccacugguccucugguccacugguucucugguccucugguccacugguucucugguccucuggucaucugguccacugguccacugguuc	107	NC_040021.1(+):20197521-20197628	1
lcr-miR-N205	cggugcauguaugaauaaag	20	NC_040021.1_11600	cggugcauguaugaauaaagcuuuauguaagccauucacuacaugcucccac	52	NC_040021.1(+):21885214-21885266	2.5
lcr-miR-N206	caucuguucccugauugauuca	22	NC_040021.1_11653	ucgaaucagggaacauccagugagucuuuaacaucugucacaucuguucccugauugauuca	62	NC_040021.1(+):22775339-22775401	4.9
lcr-miR-N207	acaucuaaggcuggugacucag	22	NC_040021.1_11699	ugggcucuagucugaggugcugucaacuuacgacaucuaaggcuggugacucag	54	NC_040021.1(+):23670150-23670204	74.9
lcr-miR-N208	uacugugagugaucugggcugc	22	NC_040021.1_11708	cgcucagaucagauacaccguaucagguguaaaucugucugguacugugagugaucugggcugc	64	NC_040021.1(-):429705-429769	9.7
lcr-miR-N209	uagaucucuuuguaauucagga	22	NC_040021.1_11740	uugaauuaaaaagaggcuaauggaaacaugguguauuagaucucuuuguaauucagga	58	NC_040021.1(-):1727128-1727186	2
lcr-miR-N21	cugucagacuguucaacagcag	22	NC_040011.1_354	gauguugaagugucugacggcuguuggaaagaaggacuuguggcugucagacuguucaacagcag	65	NC_040011.1(+):20634273-20634338	0.5
lcr-miR-N210	gggggauuagcucaaaugg	19	NC_040021.1_11836	cuucggguaucaaccuucguuuacggucacuuuauagcgcgaugccgugcauuauaggguacgacgggggauuagcucaaaugg	84	NC_040021.1(-):7334593-7334677	0.7
lcr-miR-N211	uucauggauguugaagcagguga	23	NC_040021.1_11947	uucauggauguugaagcaggugaccucuucuuuaucuaagaggucauuacacugcaucagcucaucgucauc	72	NC_040021.1(-):12796102-12796174	1.5
lcr-miR-N212	aacagacuguacaggaagguga	22	NC_040021.1_12056	aacagacuguacaggaaggugagcgugagccacaucucccugugacacuuuguuua	56	NC_040021.1(-):19789627-19789683	18.3
lcr-miR-N213	agaggcauccccccaugugugc	22	NC_040021.1_12115	agaggcauccccccaugugugcaucuuuaacagcaaacacaugugaugauguuucagg	58	NC_040021.1(-):22431956-22432014	13.8
lcr-miR-N214	ugaggagcuaugaccaagucu	21	NC_040022.1_12155	acuuguucaaaacuucucagguaucucuacaacacugaggagcuaugaccaagucu	56	NC_040022.1(+):1099476-1099532	4.3
lcr-miR-N215	ccgaucgcugacgaacaucacc	22	NC_040022.1_12281	ccgaucgcugacgaacaucaccgaucgcugaugaacaucaccgaucgcug	50	NC_040022.1(+):3376762-3376812	24.1
lcr-miR-N216	ccgaucgcugacgaacaucacc	22	NC_040022.1_12282	ccgaucgcugacgaacaucaccgaucgcugaugaacaucaccgaucgcugaugaacaucaccgaucguagacgaacaucaccgaucgcagacgaacaucaccgaucgcaga	111	NC_040022.1(+):3376762-3376873	5
lcr-miR-N217	agguagacugugacuuguugu	21	NC_040022.1_12288	agguagacugugacuuguugucaaaacgugaauguacaacaacaaaaucacuagucuucca	61	NC_040022.1(+):3669184-3669245	29.7
lcr-miR-N218	cuuggaaaggcucgggggc	19	NC_040022.1_12304	cuuggaaaggcucgggggcgaagguuuacagugcccacccgcccggaccucgccgcu	57	NC_040022.1(+):4300534-4300591	14590.9
lcr-miR-N219	aguaacuacuuccuguaggc	20	NC_040022.1_12437	aguaacuacuuccuguaggcuaaugauaacauuagccuacaggagaaguaguuaaaugg	59	NC_040022.1(+):9267428-9267487	0
lcr-miR-N22	ugugugugugugugugugug	20	NC_040011.1_52	gaggcaucaccccacuaacguuuugugugugugugugugugugug	45	NC_040011.1(+):3629294-3629339	0.4
lcr-miR-N220	uagugcaacagggaaagagugu	22	NC_040022.1_12531	gcccuuucauuauugcacugcuuguugcagcucccacaguagugcaacagggaaagagugu	61	NC_040022.1(+):10600257-10600318	1.2
lcr-miR-N221	cucaccgacagcguugaauguuca	24	NC_040022.1_12641	cacagucaacggucgaugguuuuuaugugauccauaccaaacucaccgacagcguugaauguuca	65	NC_040022.1(+):15368187-15368252	120.9
lcr-miR-N222	uuggaacauuugaauacaugu	21	NC_040022.1_12792	uuggaacauuugaauacauguauaauacauguauucaaauguuccaaaa	49	NC_040022.1(+):20578445-20578494	1.6
lcr-miR-N223	aaaacagcgacagcacaaaaug	22	NC_040022.1_13043	ccuugugugugucguuguuauuugcaaugcaaaaaucaaaaaacagcgacagcacaaaaug	61	NC_040022.1(+):24404911-24404972	4.2
lcr-miR-N224	uuucuuccuggucucaaguag	21	NC_040022.1_13073	acuugagaccaggaagaaggaaagguagugaccguucuuucuuccuggucucaaguag	58	NC_040022.1(+):24938875-24938933	0.5
lcr-miR-N225	ggacuaggaccuuccccg	18	NC_040022.1_13169	ggcucaggucugccugcugaggugacucgccuacuuugcgagaugccucgugggacuaggaccuuccccg	70	NC_040022.1(+):27205807-27205877	4.9
lcr-miR-N226	augugcucugagaucaguga	20	NC_040022.1_13174	augugcucugagaucagugaccuugcuuuaaaggucacugaugugucagcgacacacac	59	NC_040022.1(+):27228344-27228403	1.9
lcr-miR-N227	uuggccgugagcucagagcga	21	NC_040022.1_13302	uuggccgugagcucagagcgacggguacccgucgcucugagcucacggccaagcuga	57	NC_040022.1(+):31157989-31158046	6.7
lcr-miR-N228	gacuuggucauagcuccucagu	22	NC_040022.1_13385	gacuuggucauagcuccucaguguuguagagauaccugagaaguuuugaacaaguauag	59	NC_040022.1(-):1099471-1099530	40184.6
lcr-miR-N229	gacuuggucauagcuccucagu	22	NC_040022.1_13386	ugaggaguguuucuguuugucugugcuccuagacuuggucauagcuccucagu	53	NC_040022.1(-):1099508-1099561	4.4
lcr-miR-N23	ugggacaaugacagcaaauuc	21	NC_040011.1_665	auuugcuuucauuguccaaacucaacuuuuaucguugggacaaugacagcaaauuc	56	NC_040011.1(+):31559107-31559163	4.2
lcr-miR-N230	guucaaaucucgguggaa	18	NC_040022.1_13424	guaaugguuagcacucuggacucugaauccagcgauccgaguucaaaucucgguggaa	58	NC_040022.1(-):2614897-2614955	0
lcr-miR-N231	cucgccggucgaugaaugcca	21	NC_040022.1_13509	ucacauucaucgcugucgguggguuggugacgcugucaacucgccggucgaugaaugcca	60	NC_040022.1(-):3782436-3782496	5.3
lcr-miR-N232	aaugugucuguuuacuucugg	21	NC_040022.1_13548	agaaguaaauagacaccuucauucaaauuuaaauuaaaugugucuguuuacuucugg	57	NC_040022.1(-):4860185-4860242	107.9
lcr-miR-N233	aucacugaucugccuguguagu	22	NC_040022.1_13709	aucacugaucugccuguguaguuucaucuacgagcggguucgacguca	48	NC_040022.1(-):8141644-8141692	0
lcr-miR-N234	ggugucuauuuacuucuugca	21	NC_040022.1_13896	ugcaagacguaaauagacaccuuuuaauuugaauuugaaugaaggugucuauuuacuucuugca	64	NC_040022.1(-):14221636-14221700	5.4
lcr-miR-N235	uagggguaugauucucgc	18	NC_040022.1_13972	uagggguaugauucucgcuucgggugcgagaggucccggguuc	43	NC_040022.1(-):17260037-17260080	6.1
lcr-miR-N236	uuuggaacauuugaauacaugu	22	NC_040022.1_14023	uuuggaacauuugaauacauguauuauacauguauucaaauguuccaaaau	51	NC_040022.1(-):20578441-20578492	4.9
lcr-miR-N237	agacacaugaauaugaauacau	22	NC_040022.1_14275	agacacaugaauaugaauacaucauuauaaauaugaauguauucauaugaauguacuua	59	NC_040022.1(-):25456123-25456182	3.5
lcr-miR-N238	ucugaaucagguguguuggagg	22	NC_040022.1_14445	ucugaaucagguguguuggaggaaccaccucaguuccaccgucacccucugguc	54	NC_040022.1(-):29082383-29082437	0
lcr-miR-N239	uuggccgugagcucagagcga	21	NC_040022.1_14485	uuggccgugagcucagagcgacggguacccgucgcucugagcucacggccaagcuga	57	NC_040022.1(-):31157983-31158040	6.9
lcr-miR-N24	ugucuauuuacuucuugcaugu	22	NC_040011.1_68	ugcaaggaguaaauagacaccuuuaauuugaauuugaaugaacgugucuauuuacuucuugcaugu	66	NC_040011.1(+):5626495-5626561	254.7
lcr-miR-N240	aaaacacugacuaacuagu	19	NC_040022.1_14495	uaguuaacuaguguuuaaaaaaacgcugacuaacuaguuaacuaguguuuaagcaaacacuggcuaacuagucaacuaguguuuaaaaaaacacugacuaacuagu	106	NC_040022.1(-):31557707-31557813	5.2
lcr-miR-N241	uguacgcauagggacgaaccc	21	NC_040023.1_14601	guucguccccaugaguacacauauuacacaauuauguguacgcauagggacgaaccc	57	NC_040023.1(+):6968344-6968401	19.4
lcr-miR-N242	acuguccugaugaugauugg	20	NC_040023.1_14854	acuguccugaugaugauuggcugugaguggcuuccauccagccaaucacagcaggaggugu	61	NC_040023.1(+):10546762-10546823	1.3
lcr-miR-N243	ucucugucucugucucucucagg	23	NC_040023.1_14856	ugagagaugacugugcugugaccucacucuguuuacuggagucucugucucugucucucucagg	64	NC_040023.1(+):10546887-10546951	0.1
lcr-miR-N244	acuguccugaugaugauugg	20	NC_040023.1_14866	acuguccugaugaugauuggcugugaguggcuuccauccagccaaucacagcaggaggugu	61	NC_040023.1(+):10552971-10553032	1.3
lcr-miR-N245	ucucugucucugucucucucagg	23	NC_040023.1_14868	ugagagaugacugugcugugaccucacucuguuuacuggagucucugucucugucucucucagg	64	NC_040023.1(+):10553096-10553160	0.1
lcr-miR-N246	augagacucuucuguuuggaug	22	NC_040023.1_14952	augagacucuucuguuuggauguugaucgucuuucuccaagcuggauuugucucaaua	58	NC_040023.1(+):11795361-11795419	1.7
lcr-miR-N247	ucgcuggaguuuugacgucg	20	NC_040023.1_14965	aggucaaaacuccagcgacacaucgcugcgugucgcuggaguuuugacgucg	52	NC_040023.1(+):12052272-12052324	5.4
lcr-miR-N248	ugcugaagcucugcugguugu	21	NC_040023.1_14991	agccggcauggcugaucucagcacagauguuccccguguccggugugcugaagcucugcugguugu	66	NC_040023.1(+):12770007-12770073	54.9
lcr-miR-N249	aagaguguagcuauggauuaug	22	NC_040023.1_15013	aaaucacuaacuacauucaugucuuuaucugaacaagaguguagcuauggauuaug	56	NC_040023.1(+):14390153-14390209	107.1
lcr-miR-N25	uaagccaaucagagggagagu	21	NC_040011.1_705	gcugccucugauuggcuaguacuuuuuguuggaaucaggguaagccaaucagagggagagu	61	NC_040011.1(+):32549205-32549266	5.6
lcr-miR-N250	ucaaaauauuagaaacaucugu	22	NC_040023.1_15021	aaaguguuucugauauuuuguauguaaaugguguggucaaaauauuagaaacaucugu	58	NC_040023.1(+):14838261-14838319	205.7
lcr-miR-N251	aaauacgucaaagcuacaugau	22	NC_040023.1_15185	aaauacgucaaagcuacaugauguugauuaaacgucaucauguagcuuugacguauuccc	60	NC_040023.1(+):20536002-20536062	0.8
lcr-miR-N252	cucucaucagaccccaga	18	NC_040023.1_15351	ugggaccacugggggccauacagggccucucaucagaccccaga	44	NC_040023.1(+):30809703-30809747	2.2
lcr-miR-N253	cccacuaugagcaaugaaacu	21	NC_040023.1_15400	cccacuaugagcaaugaaacugcucauaguggaaggaugaaauugcucauagugggaa	58	NC_040023.1(+):31903859-31903917	4.6
lcr-miR-N254	cuuucgguuaucuagcuuuaug	22	NC_040023.1_15480	cuuucgguuaucuagcuuuaugaagaauguacaucacucauacagcuagauaaccaaagauaa	63	NC_040023.1(+):35706813-35706876	10.5
lcr-miR-N255	ucucuuccuguucuggcuugu	21	NC_040023.1_15686	ucucuuccuguucuggcuugucguggcuuugaaugagagcaugucagcgaacgacagacggacagagagagaaa	74	NC_040023.1(+):43021447-43021521	5.5
lcr-miR-N256	uaaguauuguuagaggaccuucu	23	NC_040023.1_15689	gaagguccucuaacaauacuuacaacugcaguuguaaguauuguuagaggaccuucu	57	NC_040023.1(+):43661767-43661824	15.6
lcr-miR-N257	ucagaacacacacaggua	18	NC_040023.1_15777	ucagaacacacacagguaacacaccugaccucaggugaaugaggcagcccugaggucagguguguuaccugugagcugccu	81	NC_040023.1(+):48548816-48548897	0.2
lcr-miR-N258	ugacucugaggguucuacgugu	22	NC_040023.1_15782	ugacucugaggguucuacguguuuccuguagaacccguagaacccucagagucag	55	NC_040023.1(+):48685506-48685561	82.8
lcr-miR-N259	ugacucugaggguucuacgugu	22	NC_040023.1_15784	ugacucugaggguucuacguguuuccuguagaacccguagaacccucagagucag	55	NC_040023.1(+):48686241-48686296	83.2
lcr-miR-N26	uucaugaggcuuugacgauga	21	NC_040011.1_74	auuucguccgauccuuuugaaacuuggcacauggguucaugaggcuuugacgauga	56	NC_040011.1(+):6196296-6196352	125.4
lcr-miR-N260	cuuucgguuaucuagcuuuaug	22	NC_040023.1_15793	cuuucgguuaucuagcuuuaugaagaauguacgucacucauacagcuagauaaccaaagauaa	63	NC_040023.1(-):161188-161251	10.4
lcr-miR-N261	caagaaguaaauagacaccu	20	NC_040023.1_15797	caagaaguaaauagacaccuucauucaaauuaaaggugucucuuuacuucuugcau	56	NC_040023.1(-):592790-592846	217.1
lcr-miR-N262	uuuacccugggauguuguacg	21	NC_040023.1_15849	uuuacccugggauguuguacgcacaucuguggcgcguauaucugcgcaaggugaagc	57	NC_040023.1(-):2798608-2798665	5.3
lcr-miR-N263	ccugaaucagguguguuggagc	22	NC_040023.1_15881	ccagcacaccugauucaaaugaguggcucauuagcaggcccacugcagagccugaugaucaccugaaucagguguguuggagc	83	NC_040023.1(-):4533123-4533206	20.9
lcr-miR-N264	cagcacugugugguaucu	18	NC_040023.1_15944	agucccaguuuguguccagccauuggaugcacacagcacugugugguaucu	51	NC_040023.1(-):7181568-7181619	3.3
lcr-miR-N265	uggcacagugugagcucugg	20	NC_040023.1_15954	auguauuuacaugugugcaauaaagacuacaguacaugcuguaguuguuugguggcacagugugagcucugg	72	NC_040023.1(-):7183036-7183108	0.9
lcr-miR-N266	ugggucggcuuggaaaggcu	20	NC_040023.1_15982	cuccccggcgcuggcuggccuccgcgggcgcauuuccuccgcgaccggcuuugggucggcuuggaaaggcu	71	NC_040023.1(-):8752622-8752693	1.6
lcr-miR-N267	uacugaacauaccgaccaaca	21	NC_040023.1_16044	ugguugaucgguauguucaguauguuuacaacauacugaacauaccgaccaaca	54	NC_040023.1(-):10889327-10889381	12.1
lcr-miR-N268	ugucuguggcgguuugaccga	21	NC_040023.1_16086	agucagugaauccaccugacagucucagagaagucucuugcuucaaggacauuucaggcugucuguggcgguuugaccga	80	NC_040023.1(-):11804389-11804469	5.2
lcr-miR-N269	auccugccgacaacgcca	18	NC_040023.1_16147	auccugccgacaacgccagguuuguggcggcacgggggguuau	43	NC_040023.1(-):13917002-13917045	0.8
lcr-miR-N27	guuguuauaguauuccaccua	21	NC_040011.1_841	gguggaauaauauaacaauauucuccauguuguuauaguauuccaccua	49	NC_040011.1(+):38167024-38167073	5.4
lcr-miR-N270	aauacgucaaagcuacaugaug	22	NC_040023.1_16261	aauacgucaaagcuacaugaugacguuuaaucaacaucauguagcuuugacguauuuc	58	NC_040023.1(-):20536000-20536058	0.2
lcr-miR-N271	aauaccaagagaagcaaaaga	21	NC_040023.1_16304	ucuuuugcuuuccuuggucgucuuaacuucacgcuaaagaauaccaagagaagcaaaaga	60	NC_040023.1(-):24446188-24446248	91.2
lcr-miR-N272	agcugaucuuaccguuugaua	21	NC_040023.1_16526	agcugaucuuaccguuugauagugauagaagaugcauaucaaaugguaacguuggcuaga	60	NC_040023.1(-):35892934-35892994	26
lcr-miR-N273	ugguucggagacacucuuaaca	22	NC_040023.1_16646	gagggaguugcucugaaauaacugugauaucucggcugugguucggagacacucuuaaca	60	NC_040023.1(-):41803798-41803858	4.9
lcr-miR-N274	cguaguucaacgaugugucu	20	NC_040023.1_16762	acacaucguuguuccugcggcugacacaagaccaggcguaguucaacgaugugucu	56	NC_040023.1(-):48520386-48520442	26.5
lcr-miR-N275	acguguccucgccaagaacg	20	NC_040023.1_16768	acguguccucgccaagaacguguccucaccaagaacacgaccuugucaagaacgugacc	59	NC_040023.1(-):48635636-48635695	187.1
lcr-miR-N276	uguaauaguaguaguaacugu	21	NC_040024.1_16788	uguaauaguaguaguaacugucauggcuaugacaguuacuacuacuauuacaca	54	NC_040024.1(+):108145-108199	1520.5
lcr-miR-N277	uuuuagaagacacacaugcuga	22	NC_040024.1_17021	uguguguguguucgucugauaauacuuaaaguauuuuagaagacacacaugcuga	55	NC_040024.1(+):8488920-8488975	2.3
lcr-miR-N278	ucucggucucgauuuaggugg	21	NC_040024.1_17094	ucucggucucgauuuagguggucuugaauucagcgcugccucuuugucugagaccgagaca	61	NC_040024.1(+):10953795-10953856	0
lcr-miR-N279	cacaggacucuuaaaggc	18	NC_040024.1_17103	uccgauaggccugaugcauuucacaggacucuuaaaggc	39	NC_040024.1(+):11600360-11600399	1
lcr-miR-N28	cugcccuggcacugcaacugc	21	NC_040011.1_944	aguugcuuguaucugggaaagcuaccgcugcccuggcacugcaacugc	48	NC_040011.1(-):1780315-1780363	1.6
lcr-miR-N280	ugacaacagccagagaacaga	21	NC_040024.1_17218	ugacaacagccagagaacagacuguucuccggcuguucuccggcuguucucugguuguucccugg	65	NC_040024.1(+):12317091-12317156	5.5
lcr-miR-N281	ucagccagaguauaaauacagg	22	NC_040024.1_17245	ucagccagaguauaaauacaggaaguagucggcuacuuccuguauuuauacucuggcugaca	62	NC_040024.1(+):13785151-13785213	29.6
lcr-miR-N282	uguaauaguaguaguaacugu	21	NC_040024.1_17285	uguaauaguaguaguaacugucauagccaugacaguuacuacuacuauuaca	52	NC_040024.1(-):108144-108196	5
lcr-miR-N283	ucaugacucggcaaaagaagg	21	NC_040024.1_17434	ccucuuuugucgagucaggagaaagcugagaaucaugacucggcaaaagaagg	53	NC_040024.1(-):4082169-4082222	4.9
lcr-miR-N284	cugugauaguuugacaccaucu	22	NC_040024.1_17455	auggugucaaacugucacacuuuguagacugugauaguuugacaccaucu	50	NC_040024.1(-):6311424-6311474	0
lcr-miR-N285	auucuugauucuguggaggaca	22	NC_040024.1_17513	auucuugauucuguggaggacagacaauugauggucagccuccaucagaucagucaagaaa	61	NC_040024.1(-):9844022-9844083	3.4
lcr-miR-N286	ugcugcugcuucauaauaaua	21	NC_040024.1_17593	ugcugcugcuucauaauaauagccuuucuucagugacccuuuggaaggguuuuaaugugaagcagcagcagg	72	NC_040024.1(-):12493773-12493845	0.2
lcr-miR-N287	caagaaguaaauagacaccu	20	NC_040025.1_17634	caagaaguaaauagacaccuucauucaaauucauauuaaaggugucuuuuuacuucuugcau	62	NC_040025.1(+):725011-725073	225.8
lcr-miR-N288	cgcgucagguguuguuguguaa	22	NC_040025.1_17734	cgcgucagguguuguuguguaacaguguuaaagagaaacacagaaacauccugacac	57	NC_040025.1(+):6090371-6090428	4.4
lcr-miR-N289	ugcaagaaguaaauagacaccu	22	NC_040025.1_17781	ugcaagaaguaaauagacaccuuuauucaaauucaaauuaaaugugucuguuuacuucuugcaug	65	NC_040025.1(+):6916217-6916282	6795.1
lcr-miR-N29	uagcagcacaucauuacugguagu	24	NC_040011.1_945	uagcagcacaucauuacugguaguucuaucugcauugccaguaugauaugugcugcuccu	60	NC_040011.1(-):1786881-1786941	5.4
lcr-miR-N290	acuucacaccacugaaaucugg	22	NC_040025.1_17834	acuucacaccacugaaaucugguuuaaacacagauacagacuccgguggaaugaaggau	59	NC_040025.1(+):10349573-10349632	945.3
lcr-miR-N291	uaggugaguuuuaucuguguga	22	NC_040025.1_17945	gcagacagauaaaaccucaccuacauacacguaggugaguuuuaucuguguga	53	NC_040025.1(+):15096350-15096403	4.9
lcr-miR-N292	cugccuuuuacuuaugaauuu	21	NC_040025.1_18061	acucaagaguugaugcagcaggacucugccuuucagagaacuaccugagagggaaaaaagagacugccuuuuacuuaugaauuu	84	NC_040025.1(+):19285443-19285527	0.6
lcr-miR-N293	cauucugcccugugaugcggugu	23	NC_040025.1_18074	cauucugcccugugaugcgguguuuguguauaaauugugcagcucacaugucagagugcc	60	NC_040025.1(+):19574708-19574768	0.5
lcr-miR-N294	aagaacagcuuuaucaaguuu	21	NC_040025.1_18137	acuugauaaagcuguucuuaagugauaaaguacacuuaagaacagcuuuaucaaguuu	58	NC_040025.1(+):21528490-21528548	0.1
lcr-miR-N295	ucguugcgugccccgguuccau	22	NC_040025.1_18179	gcaccggugcacgcaguggcggaggugcgucguugcgugccccgguuccau	51	NC_040025.1(+):23101150-23101201	0.3
lcr-miR-N296	aaccgggaauuucgugucagccaa	24	NC_040025.1_18189	caaugacacguuuucucccggauugcuggcgacacuaaacgcaaccgggaauuucgugucagccaa	66	NC_040025.1(-):192647-192713	5
lcr-miR-N297	uaguuugauacacagcacaauaa	23	NC_040025.1_18303	agauguugaguaucaaacuguauguuuuauaugucauauauaguuugauacacagcacaauaa	63	NC_040025.1(-):4892020-4892083	1763.1
lcr-miR-N298	ucagucgguagagcauca	18	NC_040025.1_18517	ucagucgguagagcaucaaaggcucaguccuugccuuggcguuccaggguucgaaucagaccuguggcucuuuaccgcauguc	83	NC_040025.1(-):14180825-14180908	0.6
lcr-miR-N299	uggggacagacagacagaca	20	NC_040025.1_18545	uggggacagacagacagacaugcagacagacagacauguguccaucagccuggcucugc	59	NC_040025.1(-):15318125-15318184	0.6
lcr-miR-N3	ccgaacauguugcucuccacaaag	24	NC_040011.1_1077	ccgaacauguugcucuccacaaaguuuugguagcagcugaacuuguggagauacaugugcga	62	NC_040011.1(-):7811040-7811102	19.2
lcr-miR-N30	cgugaccaugugaccauguga	21	NC_040012.1_1893	acgugaccaugugaccaugugaccacgugaccaugugaccauguga	46	NC_040012.1(+):1277204-1277250	1.3
lcr-miR-N300	aagaacagcuuuaucaaguuu	21	NC_040025.1_18712	acuugauaaagcuguucuuaaguguacuuuaucacuuaagaacagcuuuaucaaguuu	58	NC_040025.1(-):21528487-21528545	0.1
lcr-miR-N301	acucacaagugggacugaauac	22	NC_040026.1_18894	acucacaagugggacugaauacaacuucacucucuacacuguguuuggaaau	52	NC_040026.1(+):8457377-8457429	3.8
lcr-miR-N302	ugaauaucagcacggcuguga	21	NC_040026.1_19049	ugaauaucagcacggcugugauuauguuucacugucuacagccgugcugauauucagu	58	NC_040026.1(+):16462562-16462620	114.1
lcr-miR-N303	uucucgugagcacaagauacu	21	NC_040026.1_19391	uucucgugagcacaagauacuuucuugugcucaucagaaaguaucccgugcucacgagauac	62	NC_040026.1(-):7190632-7190694	1.9
lcr-miR-N304	agguaaacacgcaagcggcagu	22	NC_040026.1_19393	uugccgcugugagguucagcucuguguacuucagagguaaacacgcaagcggcagu	56	NC_040026.1(-):7446899-7446955	29.1
lcr-miR-N305	caguggaucugcuuugcaaca	21	NC_040026.1_19471	gugcauuguaguugcauugcauguuaggcuaacacgugcaguggaucugcuuugcaaca	59	NC_040026.1(-):11035134-11035193	4.9
lcr-miR-N306	auuccucaugcugaacuguuca	22	NC_040026.1_19655	auuccucaugcugaacuguucagaucugugagcaguucagcagcgagguuug	52	NC_040026.1(-):23021556-23021608	36.6
lcr-miR-N307	uuaaguguggcauuaacugaca	22	NC_040027.1_19869	ucaguuaaugccacacuuaaugcuauuuuuagcauuaaguguggcauuaacugaca	56	NC_040027.1(+):9355578-9355634	424.8
lcr-miR-N308	uggaugguucugugcaacucu	21	NC_040027.1_20081	caguuguacauaacucaggcagaucuuguucauugcuucuggaugguucugugcaacucu	60	NC_040027.1(+):17579878-17579938	136.6
lcr-miR-N309	guacacacacacacacaca	19	NC_040027.1_20170	uguggaugcguaugugcugagguacacacacacacacaca	40	NC_040027.1(+):21291462-21291502	0.6
lcr-miR-N31	ucaaagacucugagaaag	18	NC_040012.1_2018	uuuccaugaagauaacuuuguccaguucugcuacugaaugaaaguggugauaucaaagacucugagaaag	70	NC_040012.1(+):6357237-6357307	2.6
lcr-miR-N310	uucagucauuguuucuggucgug	23	NC_040027.1_20171	cagcuggaaacuuugccugggaauuugugcgcucaaaaauuucagucauuguuucuggucgug	63	NC_040027.1(+):21383579-21383642	5
lcr-miR-N311	cugguccaccugcugacagagc	22	NC_040027.1_20177	cugucaguuggcggauuucagccuccagcucuuucugcgucugguccaccugcugacagagc	62	NC_040027.1(+):21655697-21655759	15.5
lcr-miR-N312	uacaaucaacggucgaugguuu	22	NC_040027.1_20202	uacaaucaacggucgaugguuuuuucaauuuagcugaaacucaccgacagcguugaauguuca	63	NC_040027.1(+):24179228-24179291	10061.3
lcr-miR-N313	cuaugauguggcugaagacugu	22	NC_040027.1_20204	ugucgacucacccagaucaauagcgucuguuguuuucgcuaugauguggcugaagacugu	60	NC_040027.1(+):24180030-24180090	12.2
lcr-miR-N314	uugcccauuggugugaaugu	20	NC_040027.1_20215	cauucacuuaauaggguaauuggugacucuaaauugcccauuggugugaaugu	53	NC_040027.1(+):26501332-26501385	129.5
lcr-miR-N315	gguucgauccagucugguccugc	23	NC_040027.1_20415	gguucgauccagucugguccugcuaaucucuaaaaggaggaaaaguuggauccgacagg	59	NC_040027.1(-):6806717-6806776	763.4
lcr-miR-N316	uuaaguguggcauuaacugaca	22	NC_040027.1_20470	ucaguuaaugccacacuuaaugcuaaaaauagcauuaaguguggcauuaacugaca	56	NC_040027.1(-):9355575-9355631	424.6
lcr-miR-N317	ugcaagaaguaaauagacaccu	22	NC_040027.1_20510	ugcaagaaguaaauagacaccuuugaauuagaauuugaaugaaggugucuguuuacuuuuugc	63	NC_040027.1(-):10191189-10191252	6531.1
lcr-miR-N318	ccugauccugucugaaugugg	21	NC_040027.1_20596	ccugauccugucugaauguggccuuaagcucaugaauuaccaugauauucaccuuuggacugagucagggu	71	NC_040027.1(-):14454216-14454287	0.3
lcr-miR-N319	guuccugcugaacugagccagu	22	NC_040027.1_20793	guuccugcugaacugagccaguuuucagguaaaacacugauaccaguucaguaggcacggg	61	NC_040027.1(-):20690103-20690164	11.3
lcr-miR-N32	ugcuuaaugcuuuugggaaa	20	NC_040012.1_2027	uucuuaaaaguaacggagugcaaaggguuuguuccauugugcuuaaugcuuuugggaaa	59	NC_040012.1(+):6426693-6426752	14.1
lcr-miR-N320	ugaugacagugauggaggaga	21	NC_040028.1_20964	ugaugacagugauggaggagaucucucaccuucuccuucaucauugucucguc	53	NC_040028.1(+):772850-772903	5.2
lcr-miR-N321	agaauggaccaacuucuacaag	22	NC_040028.1_20985	aaguagaugugguguccagcucuucuguuuuaugucaaagagaugcagaagaauggaccaacuucuacaag	71	NC_040028.1(+):1440336-1440407	5
lcr-miR-N322	uauguguuuguguguguguagu	22	NC_040028.1_21057	cacacacacacacacacauauacaucuauaucuauguguuuguguguguguagu	54	NC_040028.1(+):3015736-3015790	3.9
lcr-miR-N323	uuagaguagaagaaauguuacg	22	NC_040028.1_21452	uuagaguagaagaaauguuacguuacuuccacaguggcugugaaaguaacguaauguuucuucuacucuaaga	73	NC_040028.1(+):18003360-18003433	13.2
lcr-miR-N324	uauaccuccuugauuacaaagu	22	NC_040028.1_21475	uuuguaaugaaggagguauaguuguagucacuauaccuccuugauuacaaagu	53	NC_040028.1(+):19248321-19248374	27
lcr-miR-N325	ucacggggauucagugaaguug	22	NC_040028.1_21492	ucacggggauucagugaaguugcguugaaguugcaaaucgcaacaucgugaauuccuggagg	62	NC_040028.1(+):19781384-19781446	5
lcr-miR-N326	uuaaaggaucaguucacuau	20	NC_040028.1_21558	uuaaaggaucaguucacuaugcugaucacacauggugaacugcuccuuuaacg	53	NC_040028.1(+):22002374-22002427	0.7
lcr-miR-N327	acagagaccaucagagaccau	21	NC_040028.1_21571	acagagaccaucagagaccaucagaggucucugauggucucugaugguc	49	NC_040028.1(+):22226643-22226692	1.9
lcr-miR-N328	caagaaguaaauagacaccu	20	NC_040028.1_21719	caagaaguaaauagacaccuucauucaaauucaaauuaaaggugucuauuuacuucgcauguc	63	NC_040028.1(-):13603429-13603492	5.2
lcr-miR-N329	caaaaaguaaauagacaccu	20	NC_040028.1_21739	caaaaaguaaauagacaccuucauucaaauucaaauuaaaggugucuauuuaaaucuugca	61	NC_040028.1(-):15113525-15113586	0.1
lcr-miR-N33	uggaggaaaucugcuucuguug	22	NC_040012.1_2117	uggaggaaaucugcuucuguugguuugguauuacuaaaagaucacaggagcagaguuuuucca	63	NC_040012.1(+):10380378-10380441	4.5
lcr-miR-N330	cagcagcacgaucaauacuggag	23	NC_040028.1_21839	cagcagcacgaucaauacuggaggcuucagcuagagucuuaacuccaauauuuacgugcugcuacag	67	NC_040028.1(-):20474135-20474202	5.2
lcr-miR-N331	ugaacacagggaacacagguga	22	NC_040028.1_21861	ugaacacagggaacacaggugacguucugaacuuaccuggacucugucuucauc	54	NC_040028.1(-):21244645-21244699	0.9
lcr-miR-N332	aacgaccaucagagaccauca	21	NC_040028.1_21887	aacgaccaucagagaccaucagagaccucugauggucucugauggucucug	51	NC_040028.1(-):22226643-22226694	2.2
lcr-miR-N333	aucccggacgagccccca	18	NC_040029.1_21908	ggugcgagaggucccggguucagaucccggacgagccccca	41	NC_040029.1(+):286193-286234	1
lcr-miR-N334	uuaccaaugacgcuaauuaagg	22	NC_040029.1_21910	uuaccaaugacgcuaauuaaggcucagguccauuuagugcagcagaaccgggaccucaauuagcaucacugguaacac	78	NC_040029.1(+):321393-321471	531.6
lcr-miR-N335	ugacagaucaugagguaaug	20	NC_040029.1_21943	uuaccucaugaucugucacacucuugugacagaucaugagguaaug	46	NC_040029.1(+):1979423-1979469	1.5
lcr-miR-N336	guaguuccaguacucgaguac	21	NC_040029.1_22083	guaguuccaguacucgaguacuguguaguuccauuacucgaguacucuguagu	53	NC_040029.1(+):11180830-11180883	6.8
lcr-miR-N337	ggcgugauucuggcgugacg	20	NC_040029.1_22085	ugauucuggcgugacgcuggcgugacucuggcgugacgcuggcgugauucuggcgugacucuggcgugacgcuggcgugacgcuggcgugauucuggcgugacg	104	NC_040029.1(+):11258486-11258590	4.4
lcr-miR-N338	uuaccaaugacgcuaauuaagg	22	NC_040029.1_22113	uuaccaaugacgcuaauuaaggugccgcaguaaacaagcuuaauuaaugucauuggaaacac	62	NC_040029.1(-):1295813-1295875	1500.1
lcr-miR-N339	ugacagaucaugagguaaugc	21	NC_040029.1_22122	auuaccucaugaucugucacaagagugugacagaucaugagguaaugc	48	NC_040029.1(-):1979419-1979467	5.4
lcr-miR-N34	acaguugagcuauugucgguu	21	NC_040012.1_2171	ccgacaauguugcaacacuuuagccgccgauuagguuacaguugagcuauugucgguu	58	NC_040012.1(+):13765147-13765205	0
lcr-miR-N340	uugucaucugcagagagaga	20	NC_040029.1_22132	ucucucucucagcuugacaggugagaauuauacuguguccuugucaucugcagagagaga	60	NC_040029.1(-):2920306-2920366	34.3
lcr-miR-N341	acuuuguacacacugccuga	20	NC_040029.1_22134	agguuguguguacaagugugcgcacccaagugugugcacuuuguacacacugccuga	57	NC_040029.1(-):3078099-3078156	2.5
lcr-miR-N342	uuuggaguuggauuguguugugu	23	NC_040029.1_22147	uuuggaguuggauuguguuguguuguuuuucacaauccaacacaauccaacgccaaacu	59	NC_040029.1(-):5660990-5661049	4.4
lcr-miR-N343	ugcaagaaguaaauagacaccu	22	NC_040029.1_22154	ugcaagaaguaaauagacaccuuuaauuugaauuugaaugaaggugucuguuuacuuuuugcau	64	NC_040029.1(-):6113581-6113645	6567.9
lcr-miR-N344	uacagugaauggccauccuaagu	23	NC_040029.1_22156	uugaaggaggcuguuuacugcguaguuauucuuuaaaguacagugaauggccauccuaagu	61	NC_040029.1(-):6121558-6121619	1.7
lcr-miR-N345	acagcucgcugucugagagacg	22	NC_040029.1_22240	ucucauccagugauccgguucuguguguucauacugggacagcucgcugucugagagacg	60	NC_040029.1(-):10460594-10460654	1.5
lcr-miR-N346	ugugcuuuaccgucaauauuggc	23	NC_040030.1_22326	ugugcuuuaccgucaauauuggcacgacagugaaguaccucaguuacugaagugacaauaauugcgaugaagcacacc	78	NC_040030.1(+):2585411-2585489	2.5
lcr-miR-N347	acgguucuguuuuuugucca	20	NC_040030.1_22392	gcucaaaaaacagaacucuuauuuucaggugauucaaugacgguucuguuuuuugucca	59	NC_040030.1(+):5842099-5842158	3.3
lcr-miR-N348	uauggcccuaugguaauucacu	22	NC_040030.1_22458	uauggcccuaugguaauucacugauagugagcucucacagugaauucuaccagugccauaca	62	NC_040030.1(+):9001531-9001593	7.5
lcr-miR-N349	gugcuauauaacugaaauga	20	NC_040030.1_22546	gugcuauauaacugaaaugaguuaugacucauuucaguuauagagcacgugc	52	NC_040030.1(+):14638636-14638688	14
lcr-miR-N35	uuccccuguccucugucca	19	NC_040012.1_2190	gauagaguucacggguaguguuggcugcagcuccuccugcucccgcuauuaacuuccccuguccucugucca	72	NC_040012.1(-):651877-651949	5.3
lcr-miR-N350	ugaacagucugagcucuga	19	NC_040030.1_22647	gaacagucugaacagucugaacaggcugaacagucugagcucuga	45	NC_040030.1(+):18377058-18377103	4.8
lcr-miR-N351	uaaagaaccgggaucagg	18	NC_040030.1_22688	uaaagaaccgggaucagguccugaacaguccgggucaccugaccugaucccgguucuucagg	62	NC_040030.1(+):18676675-18676737	1.2
lcr-miR-N352	cagcgcugaggucgacuuaacg	22	NC_040030.1_22759	cagcgcugaggucgacuuaacgccaaaagcuuuugcguuaagucgccuccgcacuuca	58	NC_040030.1(-):3167532-3167590	1.5
lcr-miR-N353	aggcucgggggcgaaggug	19	NC_040030.1_22767	aggcucgggggcgaagguggcucacggcuccagcugcgagcuuuacacgcccgccugcccggaccucg	68	NC_040030.1(-):4024723-4024791	1.8
lcr-miR-N354	uuuacauggaaagccaggcuag	22	NC_040030.1_22903	uuuacauggaaagccaggcuaguucauguuuauguuugagccuccuggcuuuccauacaggu	62	NC_040030.1(-):14807479-14807541	16.7
lcr-miR-N355	uuacgguaaaauucuggcagc	21	NC_040030.1_22951	uuacgguaaaauucuggcagcuguaguugccagaauuuuaccguaaaa	48	NC_040030.1(-):16435508-16435556	5.9
lcr-miR-N356	uaugaagagcuuuaugaagagc	22	NC_040030.1_22981	uaugaagagcuuuaugaagagcuguaugaagagcuuuauggagagcuuuaugga	54	NC_040030.1(-):18045331-18045385	5.1
lcr-miR-N357	uaugaagagcuuuaugaagagc	22	NC_040030.1_22982	gcuuuaugaagagcuuuaugaagagcuguaugaagagcuuuaugaagagcuuuaugaagagcuuuaugaagagc	74	NC_040030.1(-):18045363-18045437	5.3
lcr-miR-N358	uaugaagagcuuuaugaagagc	22	NC_040030.1_22983	gcuuuaugaagagcuuuauggagagcuuuaugaagagcuuuaugaagagcuuuaugaagagc	62	NC_040030.1(-):18045411-18045473	5
lcr-miR-N359	gagcuugcagauuugucuggg	21	NC_040031.1_23049	aagacacauccgccagagcaaauaaaacaugagcuugcagauuugucuggg	51	NC_040031.1(+):652223-652274	4.7
lcr-miR-N36	ucacgccgugagaacacgccg	21	NC_040012.1_2234	ccguguuaucacgccgugagaacacgccgugagaacacgccguguuaucacgccguguuaucacgccgugagaacacgccg	81	NC_040012.1(-):1868004-1868085	5.5
lcr-miR-N360	ugcaagaaguaaauagacaccu	22	NC_040031.1_23057	ugcaagaaguaaauagacaccuuuugaauuugaaugaaggcgucuauuuacuucuugcaugucu	64	NC_040031.1(+):1994410-1994474	5.7
lcr-miR-N361	ucgcaauuguugcccugucuga	22	NC_040031.1_23091	ucaggucuuucaauuugcugagucugucuaacugccucgcaauuguugcccugucuga	58	NC_040031.1(+):5223905-5223963	4.3
lcr-miR-N362	cuuucgguuaucuagcuuuaug	22	NC_040031.1_23126	cuuucgguuaucuagcuuuaugacagguauuuaacacucauacagcuagauaaccaaagacag	63	NC_040031.1(+):7687070-7687133	8.5
lcr-miR-N363	uacauggaaagccaggcuag	20	NC_040031.1_23142	uacauggaaagccaggcuagcucauguuuauauuugagccuccuggcuuuccauacaggu	60	NC_040031.1(+):8224893-8224953	16.6
lcr-miR-N364	aucccggacgagccccca	18	NC_040031.1_23166	uggggugcgagaggucccguguucagaucccggacgagccccca	44	NC_040031.1(+):10000643-10000687	1
lcr-miR-N365	uuuaaacaggcggauucaaca	21	NC_040031.1_23357	uuuaaacaggcggauucaacaguguaugaacuuuguugaauccgccgguuuaaacca	57	NC_040031.1(+):18779715-18779772	20.1
lcr-miR-N366	ugagguaguaaguuguggca	20	NC_040031.1_23362	ugagguaguaaguuguggcaguuagccauguguguggcugucagacuugcggcuggcugguggacuacugcaguagc	77	NC_040031.1(+):19355905-19355982	0.1
lcr-miR-N367	uauggcccuaugguaauucacu	22	NC_040031.1_23386	uauggcccuaugguaauucacugauugugugcugugacagugaauucuaccagugccauaca	62	NC_040031.1(+):20640409-20640471	7.9
lcr-miR-N368	uugaccuaaguuaucaagcuga	22	NC_040031.1_23397	uugaccuaaguuaucaagcugauguaacugaugucagacagcagacugacacccuuaggucugacc	66	NC_040031.1(-):138652-138718	3.1
lcr-miR-N369	ucuggaaagaugagaucugcca	22	NC_040031.1_23462	ucuggaaagaugagaucugccacucaaacuauaacagcauguuccacaucucaucuuuccagauc	65	NC_040031.1(-):4793176-4793241	0.9
lcr-miR-N37	uggcucaguccagcaggaacaag	23	NC_040012.1_2348	gugccuacugaacuggauucagugugucuuugcagaacuggcucaguccagcaggaacaag	61	NC_040012.1(-):6391196-6391257	56.2
lcr-miR-N370	uacagccgugcugauauucaga	22	NC_040031.1_23522	ugaauguaaacacgguccggucgaaggcacaaagcuguaagugugaaugugaaaguuaauuacagccgugcugauauucaga	82	NC_040031.1(-):8854677-8854759	0.7
lcr-miR-N371	uguguguuugggcugcag	18	NC_040031.1_23556	gcagcccaaacacacagaaggccccagggaucguagccugacuuguguguguuugggcugcag	63	NC_040031.1(-):10472263-10472326	2.9
lcr-miR-N372	ggugucuauuuacuucuugca	21	NC_040031.1_23643	ugcaaggaguaaauagacaccuucauucaaauucaaauuaaaggugucuauuuacuucuugca	63	NC_040031.1(-):16236833-16236896	5.4
lcr-miR-N373	ugcacugcacagccaacucu	20	NC_040032.1_23840	ugcacugcacagccaacucucacagaaucaaaaaaagaaauaugucagaguuggcugugcagugcaaa	68	NC_040032.1(+):2429008-2429076	5.5
lcr-miR-N374	ugacauguaguuugguuaaucu	22	NC_040032.1_23919	guuaaccaaacuacauuuaucuguaaagcgccaugacauguaguuugguuaaucu	55	NC_040032.1(+):6819513-6819568	2.6
lcr-miR-N375	uguuuggaucuguguggacagc	22	NC_040032.1_23945	uuucacagguucuaacagucggugaugaugaugugggauguuuggaucuguguggacagc	60	NC_040032.1(+):8726799-8726859	1.4
lcr-miR-N376	agccuacagacuguugucgccu	22	NC_040032.1_24070	agccuacagacuguugucgccuugcaaucuuaacagccaacaccagucugauaagc	56	NC_040032.1(+):13355122-13355178	13.4
lcr-miR-N377	uguuucggucugaagagcga	20	NC_040032.1_24184	uguuucggucugaagagcgaccguguuaacuggccaccuucaggucgaaugcaug	55	NC_040032.1(+):17797273-17797328	5.2
lcr-miR-N378	uccggcucgaaggaccaugu	20	NC_040032.1_24228	uccggcucgaaggaccauguaaaauauuguuugggguuggugu	43	NC_040032.1(+):18231443-18231486	0.1
lcr-miR-N379	uaacaaucuaaagccacggucg	22	NC_040032.1_24330	accauggcuguagacuguuaccauggugcuauugcuagaguaacaaucuaaagccacggucg	62	NC_040032.1(-):1108005-1108067	5.2
lcr-miR-N38	aaacaauuauuugaucaaugga	22	NC_040012.1_2387	aaacaauuauuugaucaauggaauuaugauaauuuauucauuguucaaguaauugucaug	60	NC_040012.1(-):8855255-8855315	3.5
lcr-miR-N380	ugcacugcacagccaacucuga	22	NC_040032.1_24355	ugcacugcacagccaacucugacauauuucuuuuuuugauucugugagaguuggcugugcagugcaaa	68	NC_040032.1(-):2429005-2429073	5.9
lcr-miR-N381	ucaguaacguaagaaugaaagc	22	NC_040032.1_24366	uuucauucuuacguaacugauaagacaaauauaucagauauaucaaauaucuuaucaguaacguaagaaugaaagc	76	NC_040032.1(-):3414362-3414438	12.8
lcr-miR-N382	ugaagagaacuuucacaacucu	22	NC_040032.1_24400	aggugaugagcucuucaugucucuucucugacuaaacaucaaugaagagaacuuucacaacucu	64	NC_040032.1(-):5853049-5853113	3.5
lcr-miR-N383	uaccuauagauacgagcuugug	22	NC_040032.1_24501	uaccuauagauacgagcuugugcagccagucaccacaaguucggaucuacggguuugu	58	NC_040032.1(-):8738318-8738376	174
lcr-miR-N384	cugacuucaugacuuuauuca	21	NC_040032.1_24507	cugacuucaugacuuuauucaguguaagagucacacugaauaaagucaugaaguuaagu	59	NC_040032.1(-):9462072-9462131	30.2
lcr-miR-N385	agagccguggaacccuuaccau	22	NC_040032.1_24797	agagccguggaacccuuaccauugcuaaacucaguaaugguaacgguuugacggcccu	58	NC_040032.1(-):14313616-14313674	5.1
lcr-miR-N386	aacuucauggaugagaaguga	21	NC_040032.1_24801	ugccccucauccaagaagcuucuuuaauuuuccucaaagaaacuucauggaugagaaguga	61	NC_040032.1(-):14359208-14359269	108.8
lcr-miR-N387	uguuguuauaguauuccaccua	22	NC_040032.1_24876	ggugggauaauauaacaauauccuccauguuguuauaguauuccaccua	49	NC_040032.1(-):17547236-17547285	5.6
lcr-miR-N388	aaacauuaguaaguggaccuuu	22	NC_040033.1_25011	agguccacuuacuaaugauuaacaaugugcaauuugaaacauuaguaaguggaccuuu	58	NC_040033.1(+):536770-536828	583.6
lcr-miR-N389	ugcucugugcuccaaucaca	20	NC_040033.1_25027	ugcucugugcuccaaucacaguccagaacgccucgucccgaacugugauuggauaauagagcgaa	65	NC_040033.1(+):2398243-2398308	1.6
lcr-miR-N39	uauucucaucuaacucuuggca	22	NC_040012.1_2396	cagagaguuagaggagaagaucgauaacgcaagcguuguauagauauucucaucuaacucuuggca	66	NC_040012.1(-):9695569-9695635	5.5
lcr-miR-N390	uguauuuauacucuggcugaca	22	NC_040033.1_25039	gaggucagagacaaaaggaggaaguguugcaacauuuccuguauuuauacucuggcugaca	61	NC_040033.1(+):3220259-3220320	3.8
lcr-miR-N391	guugucguggccgagugg	18	NC_040033.1_25053	auuuucuagccaccaacagccgucaaagugguugucguggccgagugg	48	NC_040033.1(+):4326294-4326342	1
lcr-miR-N392	uuuuaagcaggagguguc	18	NC_040033.1_25097	gauccuucugacuuuuguuuuuuuuaagcaggagguguc	39	NC_040033.1(+):7308570-7308609	0.3
lcr-miR-N393	ugucguggccgagugguuaag	21	NC_040033.1_25241	uaagcacugccaugcacuacggacagacagcacuuugacaccauggcuuucccacuguguggaugucguggccgagugguuaag	84	NC_040033.1(+):18975361-18975445	0
lcr-miR-N394	aaacauuaguaaguggaccuuu	22	NC_040033.1_25298	agguccacuuacuaaugauuaacaaugugcaguugaaacauuaguaaguggaccuuu	57	NC_040033.1(-):718224-718281	569.7
lcr-miR-N395	ucauggauccacaacagagucc	22	NC_040033.1_25409	uuguagauccaugaagacguuucaccucucuucauggauccacaacagagucc	53	NC_040033.1(-):7983115-7983168	5.7
lcr-miR-N396	gaauuguggcaacugaau	18	NC_040033.1_25474	ugaguucacccuuuucgccguuuacccaucagacaauagaauggugagaauuguggcaacugaau	65	NC_040033.1(-):10854162-10854227	3.3
lcr-miR-N397	uaaguguagaauagcgaugaaa	22	NC_040033.1_25638	agacgucgcuauucuacacuuauaauaaugauauaaguguagaauagcgaugaaa	55	NC_040033.1(-):20089841-20089896	171
lcr-miR-N398	ucagugaagaaggaucagacug	22	NC_040034.1_25730	ucagugaagaaggaucagacugcugguggacaguuuaauccugucuucacauacc	55	NC_040034.1(+):2535153-2535208	13.1
lcr-miR-N399	uucccagaacagacaaacuaga	22	NC_040034.1_25798	uucccagaacagacaaacuagacaaauuaguuugucuguucuggguuuga	50	NC_040034.1(+):3734507-3734557	22.4
lcr-miR-N4	uuucuaauauuguggcccucu	21	NC_040011.1_1079	uuucuaauauuguggcccucuuguguguaaaugguguggccaaaauauuagaaacacc	58	NC_040011.1(-):7813215-7813273	5.4
lcr-miR-N40	uguuaucagcucaguaggcacag	23	NC_040012.1_2403	guuccugcugaacugagccaguguuuguuuaacaucgaacuguuaucagcucaguaggcacag	63	NC_040012.1(-):10380031-10380094	24.8
lcr-miR-N400	uccccgcuguggaugggcau	20	NC_040034.1_25810	uccccgcuguggaugggcauuaaaauuuaagcugacgcuuccauccggagcaggugagc	59	NC_040034.1(+):3852152-3852211	4
lcr-miR-N401	caaaccguggcagaaaaagacg	22	NC_040034.1_25814	caaaccguggcagaaaaagacgagcggccgcucgucuuuuucugccacgguuuauga	57	NC_040034.1(+):3911497-3911554	6
lcr-miR-N402	ucagagacggucucagagacg	21	NC_040034.1_25832	ucagagacggucucagagacggucucagagacagucucagagacggucucugagacauuucaga	64	NC_040034.1(+):4568040-4568104	2
lcr-miR-N403	uggagcugcacgguggagcugc	22	NC_040034.1_25843	agcuccaccauugaagcugcacaguguggagcugcacgguggagcugcacgguggagcugc	61	NC_040034.1(+):5082867-5082928	5.7
lcr-miR-N404	agcagcauuguacagggcugaa	22	NC_040034.1_25847	cagccucuuuacggucugccuuguggcgucuugaucaagcagcauuguacagggcugaa	59	NC_040034.1(+):5141169-5141228	1.3
lcr-miR-N405	ugauucaaugaguccagcgggccc	24	NC_040034.1_25868	ccuccuggucucgcugcuucagcugaaccucuuuaaucugauucaaugaguccagcgggccc	62	NC_040034.1(+):5729333-5729395	35.9
lcr-miR-N406	ucugacacgugaacccgugagu	22	NC_040034.1_25870	ucugacacgugaacccgugagucugcugaugacccacagguucaccgggucagagg	56	NC_040034.1(+):5732338-5732394	33.8
lcr-miR-N407	guguuuaacuguagauaaa	19	NC_040034.1_25881	ugucugccuuuuaauauaacuuacaguguuuaacuguagauaaa	44	NC_040034.1(+):5806194-5806238	0.3
lcr-miR-N408	augaagcuguuaaucaaccuaaa	23	NC_040034.1_25903	uugguuuauuaacagcuucauuaaacaugaagcuguuaaucaaccuaaa	49	NC_040034.1(+):6238869-6238918	1.8
lcr-miR-N409	cacguuguccucucugaguu	20	NC_040034.1_25959	cucagauauugugggagcccauauuacaugauguagcccugggcacucacguuguccucucugaguu	67	NC_040034.1(+):9016340-9016407	1.8
lcr-miR-N41	ugggcgauugcuuggaccccaga	23	NC_040012.1_2412	ugggguccugucaaugguccuaucaaucgugggcgauugcuuggaccccaga	52	NC_040012.1(-):11250921-11250973	1.8
lcr-miR-N410	uugaacuguugagaaccacuuaa	23	NC_040034.1_26011	aagugguccuaaacauuucacaauuuucucaaagaacuguugaacuguugagaaccacuuaa	62	NC_040034.1(+):11738810-11738872	3.8
lcr-miR-N411	ucaguuugauaucuuagguuga	22	NC_040034.1_26023	agaccuaagggugucagccugcugugugacaucaauuacaucaguuugauaucuuagguuga	62	NC_040034.1(+):12524321-12524383	37.5
lcr-miR-N412	ucaaccacuuuaagaaacag	20	NC_040034.1_26029	uaauuucuuaaaguggcugacaagaaugucaaccacuuuaagaaacag	48	NC_040034.1(+):12735194-12735242	0.6
lcr-miR-N413	cgcguuauaacccgggauaaca	22	NC_040034.1_26285	cgcguuauaacccgggauaacacgcguuauaacgcguguuaucccggguuauaacgugug	60	NC_040034.1(-):4618420-4618480	2.9
lcr-miR-N414	aggccugagcucgcacuguga	21	NC_040034.1_26289	aggccugagcucgcacugugauguaacagcagagucacaguuucaguucaugccucg	57	NC_040034.1(-):5055625-5055682	0.2
lcr-miR-N415	acacuguacuguagugac	18	NC_040034.1_26334	gacuguaguacaguuuacuuuaguaacuguaguacacuguacuguagugac	51	NC_040034.1(-):5665530-5665581	0.9
lcr-miR-N416	aaaacauaaacagacuuaggg	21	NC_040034.1_26382	cuaagucuguuuauguuuuaagaccauugugccuuaaaacauaaacagacuuaggg	56	NC_040034.1(-):7324946-7325002	3.5
lcr-miR-N417	cacguuguccucucugaguu	20	NC_040034.1_26422	cucagauauugugggagcccauuacaugauguagccugggcacucacguuguccucucugaguu	64	NC_040034.1(-):9012051-9012115	1.8
lcr-miR-N418	cuuggaaaggcucgggggc	19	NC_040034.1_26423	cuuggaaaggcucgggggcgaaggugaagccgcgagcuuuacauugccugucggaccucgccgcuuccugg	71	NC_040034.1(-):9114853-9114924	1.6
lcr-miR-N419	acuggcuggcuuaaacuccug	21	NC_040034.1_26458	gggguuuaagccagccacucacuguagguuacuggcuggcuuaaacuccug	51	NC_040034.1(-):10100654-10100705	5.5
lcr-miR-N42	acagcagaaguucgcagucaga	22	NC_040012.1_2486	ugaucugggagcugcgccgagucucgagucuggaacgggacagcagaaguucgcagucaga	61	NC_040012.1(-):14090543-14090604	2.3
lcr-miR-N420	gcucguugugacggucgaucgu	22	NW_020851384.1_26643	gauugcucguugugacggucgaucguuugaucgcucguugugacggucgaucgu	54	NW_020851384.1(+):529461-529515	4.9
lcr-miR-N421	ugaagacagacagacagacaga	22	NW_020851508.1_26705	ugccugucuguccgugcagaggcugaagacagacagacagacaga	45	NW_020851508.1(+):114725-114770	5.2
lcr-miR-N422	ugaagacagacagacagacaga	22	NW_020851508.1_26706	ugccugucuguccgugcagaggcugaagacagacagacagacaga	45	NW_020851508.1(+):114725-114770	3
lcr-miR-N423	auggcugugucugcaugcagga	22	NW_020851961.1_26884	cugcaugcaggacagacagauguuacacaagacgaugcauggcugugucugcaugcagga	60	NW_020851961.1(-):125827-125887	5.1
lcr-miR-N424	ucuuccucagguuguccucag	21	NW_020852003.1_26903	ucuuccucagguuguccucaggucuuccucagcuuguccucaggucuuccucaggucguccucagg	66	NW_020852003.1(+):99798-99864	0.1
lcr-miR-N425	ugcuggaccugguggagcucu	21	NW_020852030.1_26973	aagcuccaugugugucugcagugaucucugcuggaccugguggagcucugcuggaccugguggagcucugcugggucucguggagcucugcuggaccugguggagcucu	109	NW_020852030.1(+):819970-820079	0.5
lcr-miR-N426	ugcuggaccugguggagcucu	21	NW_020852030.1_26974	agcucugcugggucucguggagcucugcuggaccugguggagcucugcugggucuuguggaacucugcuggaccugguggagcucu	86	NW_020852030.1(+):820033-820119	0.6
lcr-miR-N427	ugcuggaccugguggagcucu	21	NW_020852030.1_26975	agcucugcugggucuuguggaacucugcuggaccugguggagcucugcugagucucguggagcucugcugggucucguggagcucugcuggaccugguggagcucu	106	NW_020852030.1(+):820073-820179	0.8
lcr-miR-N428	ugcuggaccugguggagcucu	21	NW_020852030.1_26976	ugcuggaccugguggagcucugcuggaccucguggagcucugcugggucucgugga	56	NW_020852030.1(+):820158-820214	0.6
lcr-miR-N429	ugagucaccugucucaccugg	21	NW_020852030.1_26979	aggugagauggaggugagacgggucagcuggaggugagacaggugagcugagucaccugucucaccugg	69	NW_020852030.1(+):822593-822662	5.4
lcr-miR-N43	uuugcacguuucaugccugauu	22	NC_040013.1_2530	uuugcacguuucaugccugauuuuuuauguuaaaucaggcgugaaaggugcaaaau	56	NC_040013.1(+):3874196-3874252	17.3
lcr-miR-N430	ugagucaccugucucaccugg	21	NW_020852030.1_26980	ugagucaccugucucaccuggcguggcgugcaggugagacaggugagucagc	52	NW_020852030.1(+):822641-822693	6.1
lcr-miR-N431	uguucucagguggucguuaa	20	NW_020852030.1_27003	uguucucagguggucguuaagugucguuauucagucuuaaugacgaugugaggacu	56	NW_020852030.1(-):192118-192174	0.8
lcr-miR-N432	ggugagacaggugacucagc	20	NW_020852030.1_27018	ugacucaccugucucaccugcacgccacgccaggugagacaggugacucagc	52	NW_020852030.1(-):822638-822690	6
lcr-miR-N433	cuuagcaugcgagagguagcgg	22	NW_020852144.1_27084	cuuagcaugcgagagguagcgggauugacgcccgcauucuccacaaugcuuuccu	55	NW_020852144.1(+):17285-17340	1.3
lcr-miR-N434	ucucagucugcugguucucg	20	NW_020852207.1_27093	aauucagcauccugacggccugguggaucaaacugucucucagucugcugguucucg	57	NW_020852207.1(-):2952-3009	1.2
lcr-miR-N435	uaaaaucuggcaacccaaaugu	22	NW_020852449.1_27153	auuuggguugccagauuuuagauacaccgaugauaaaaucuggcaacccaaaugu	55	NW_020852449.1(+):1127-1182	2.1
lcr-miR-N436	uaaaaucuggcaacccaaaugu	22	NW_020852449.1_27156	auuuggguugccagauuuuaucaucgguguaucuaaaaucuggcaacccaaaugu	55	NW_020852449.1(-):1124-1179	2
lcr-miR-N437	acgcagcccugucagcuuagacc	23	NW_020852647.1_27187	acgcagcccugucagcuuagaccuaagucuacaaaauagagguucgaug	49	NW_020852647.1(-):309475-309524	1.3
lcr-miR-N438	uacacauacauacacacauuca	22	NW_020852749.1_27204	uguguguguguguguguguguuuacauauacacauacauacacacauuca	50	NW_020852749.1(-):8640-8690	5.5
lcr-miR-N439	agaguucaggucugugacccga	22	NW_020852853.1_27269	agaguucaggucugugacccgaguccucucagacccgaguccuggacuuggacuccuu	58	NW_020852853.1(-):236314-236372	0
lcr-miR-N44	ugcuaugccaucaaauugccauc	23	NC_040013.1_2624	aaggcaagauguuggcauagcuguugaguugaaugcccugcuaugccaucaaauugccauc	61	NC_040013.1(+):7560240-7560301	52.5
lcr-miR-N440	aacgcagcccugucagcuuaga	22	NW_020853050.1_27355	aacgcagcccugucagcuuagaccuaagucuacaaaguagagguucgauggcuaaacuguagagcuguccaga	73	NW_020853050.1(-):4014-4087	3.4
lcr-miR-N441	aacuucacugcaugcgacu	19	NW_020853172.1_27392	aacuucacugcaugcgacugcguuuccuguuauacagucgcauacacugacguugu	56	NW_020853172.1(-):369480-369536	0.3
lcr-miR-N442	aacacgccgcguguccucgccg	22	NW_020853243.1_27398	aacacgccgcguguccucgccgcguguccucgccgcguguccucgccgcguguccu	56	NW_020853243.1(+):52894-52950	1.6
lcr-miR-N443	ggugaguagagccguucgugac	22	NW_020853301.1_27425	ugcuaacuagcucuagugguuggccccggauaaccagccuugguuggugaguagagccguucgugac	67	NW_020853301.1(-):66527-66594	1.2
lcr-miR-N444	uugucuugcggggucugccaga	22	NW_020853301.1_27444	ugguggagcucugccagccaacaaacgguccuccugagcaguugucuugcggggucugccaga	63	NW_020853301.1(-):290497-290560	779.1
lcr-miR-N445	agauuucaggauguggguuaca	22	NW_020853535.1_27528	agauuucaggauguggguuacaaccuaaaacagggugugauccacaccugagaccaga	58	NW_020853535.1(+):646252-646310	5.2
lcr-miR-N446	cuaacccugccucugguguc	20	NW_020853550.1_27587	auaccgguagguggggcugacccagugggcuaacccugccucugguguc	49	NW_020853550.1(+):333759-333808	6.4
lcr-miR-N447	ggguucaaaaagaggucaaacu	22	NW_020853550.1_27614	guugaccucuuuuugaacccauuccauccaggauggaauggguucaaaaagaggucaaacu	61	NW_020853550.1(+):825085-825146	2.8
lcr-miR-N448	auccucaaucacuggcacauuc	22	NW_020853550.1_27639	auccucaaucacuggcacauucccacagcucacugugagugacgcgucaguguucaggaaug	62	NW_020853550.1(-):173031-173093	0
lcr-miR-N449	ugaguagcagcgaucaacaagc	22	NW_020853550.1_27654	uuguugaucgcugccucucagcgguguugaguagcagcgaucaacaagc	49	NW_020853550.1(-):926375-926424	1.8
lcr-miR-N45	auguguguguuuucuuucucag	22	NC_040013.1_2746	acagaaagaauccaugcacacacaaacacauccagaugagugugacuaauguguguguuuucuuucucag	70	NC_040013.1(+):14872367-14872437	9.4
lcr-miR-N450	acaucuaaggcuggugacucag	22	NW_020853563.1_27682	gggcucuagccugaggugcugucaacuuacgacaucuaaggcuggugacucag	53	NW_020853563.1(-):243152-243205	1.5
lcr-miR-N451	gagcagguuuagcugggucugu	22	NW_020853564.1_27700	agguucagcugggucguuucuugggacuguuucuucaagagcagguuuagcugggucugu	60	NW_020853564.1(-):266767-266827	2.2
lcr-miR-N452	uaaagugugucugaauuuuuga	22	NW_020853659.1_27735	aaaaguuuggacagacuuucucauuuaaguauaugguaaagugugucugaauuuuuga	58	NW_020853659.1(+):509-567	6.3
lcr-miR-N453	uuugucaugugacgcucuguca	22	NW_020853787.1_27762	uuugucaugugacgcucugucaucaagcugagaugacacugaugacaucacauugacaucau	62	NW_020853787.1(+):174879-174941	5.2
lcr-miR-N454	agguuaauguugaaauauguag	22	NW_020853787.1_27793	agguuaauguugaaauauguagaaaccuaacugaauauuucaacaugagcaaccg	55	NW_020853787.1(-):52854-52909	7
lcr-miR-N455	aagcaaugcauugucaacacug	22	NW_020854036.1_27830	aagcaaugcauugucaacacuguguucagugggggcggggugcugcugac	50	NW_020854036.1(+):115563-115613	2
lcr-miR-N456	ugcucgaccucugauuggcuagc	23	NW_020854203.1_27881	ugcucgaccucugauuggcuagcugcaauuaguugucaggagccaaucagagguccugcug	61	NW_020854203.1(-):480983-481044	0.5
lcr-miR-N457	ugaaauguuuaggaccacugga	22	NW_020854246.1_27897	cagugguucucgacaguucaacagugaagcaacauuugugaaauguuuaggaccacugga	60	NW_020854246.1(+):299269-299329	5.2
lcr-miR-N458	uaauguuagcaucuacgcagag	22	NW_020854246.1_27902	cuacgcagagcuaauguuagcaucuaugcagagcuaauguuagcaucuacgcagag	56	NW_020854246.1(-):238904-238960	1.5
lcr-miR-N459	ucauuuuggggcacuuuuaaagg	23	NW_020854291.1_27916	ucauuuuggggcacuuuuaaaggugcccauucugaaggauucagauugggcgcccuuuaaaggugcccaaaauggaa	77	NW_020854291.1(+):1139-1216	2
lcr-miR-N46	gaaaucucagcuggcaacugu	21	NC_040013.1_2798	gaaaucucagcuggcaacugugagucguucacuagcugcucucacaauggccucugggauuaugc	65	NC_040013.1(+):16572855-16572920	4.2
lcr-miR-N460	ugggacuccuucuucagcuugg	22	NW_020854308.1_27923	gucagcugcuucaggagacccacaggccaaaaaggaucugugggacuccuucuucagcuugg	62	NW_020854308.1(+):63734-63796	5.5
lcr-miR-N461	ugaggacagcugaucacaccuga	23	NW_020854355.1_27933	aggacagcugaucgcaccugaacacaccugaggacagcugaucacaccuga	51	NW_020854355.1(+):353639-353690	0.9
lcr-miR-N462	ugaggacagcugaucacaccuga	23	NW_020854355.1_27938	ugaggacagcugaucacaccugaacacagcugaucacaccugaucacagcugaucacagcugaucacaccuggacacagc	80	NW_020854355.1(+):354017-354097	0.5
lcr-miR-N463	caugaaugaugauuucagg	19	NW_020854355.1_27962	ugucagucaucuguccugcucacacaugaaugaugauuucagg	43	NW_020854355.1(-):99070-99113	2.1
lcr-miR-N464	uagacgcugcgagaugauc	19	NW_020854355.1_27993	uagacgcugcgagaugaucccguccagagcaaagcucgccucgucugca	49	NW_020854355.1(-):698987-699036	4.4
lcr-miR-N465	uccggccugaccugccucag	20	NW_020854388.1_28013	agagucaguaaggagccacugagugacgcuccggccugaccugccucag	49	NW_020854388.1(+):6033-6082	4.6
lcr-miR-N466	acugaagguuaguuagauuucu	22	NW_020854803.1_28070	acugaagguuaguuagauuucuaauuaacuagaaaucuaacuaaccuucaugga	54	NW_020854803.1(+):36216-36270	4.9
lcr-miR-N467	acugaagguuaguuagauuucu	22	NW_020854803.1_28072	acugaagguuaguuagauuucuaacuaacuagaaaucuaacuaaccuucaugga	54	NW_020854803.1(+):46966-47020	5.1
lcr-miR-N468	caugaagguuaguuagauuucu	22	NW_020854803.1_28073	caugaagguuaguuagauuucuaguuaauuagaaaucuaacuaaccuucaguug	54	NW_020854803.1(-):36213-36267	4.2
lcr-miR-N469	caugaagguuaguuagauuucu	22	NW_020854803.1_28075	caugaagguuaguuagauuucuaguuaguuagaaaucuaacuaaccuucaguug	54	NW_020854803.1(-):46963-47017	4
lcr-miR-N47	aaacgaagccuuuuauaacuca	22	NC_040013.1_2820	aaacgaagccuuuuauaacucauuacacaaaugaguucuaaaaggcuucguuuacc	56	NC_040013.1(+):17790160-17790216	169.4
lcr-miR-N470	agaauggaccaacuucuacaag	22	NW_020854910.1_28099	aaguagaugugguguccagcucuucuguguuaugucaaagagaugcagaagaauggaccaacuucuacaag	71	NW_020854910.1(+):2399-2470	4.8
lcr-miR-N471	acccaucgucucaaccagacu	21	NW_020854952.1_28121	acccaucgucucaaccagacucuuuauggccauaaagagucugguugagacgauggg	57	NW_020854952.1(+):89787-89844	6.1
lcr-miR-N472	ugugaccucugaccucauugug	22	NW_020854986.1_28147	cgauggggaaggaggugcgaccugcugagguucaaagacaacaaggaucucuguucucugugaccucugaccucauugug	80	NW_020854986.1(+):127428-127508	1.6
lcr-miR-N473	uuguuuaaccugucugucucu	21	NW_020854986.1_28149	agauagacgggucaguacaacaccggucugucuguuguuuaaccugucugucucu	55	NW_020854986.1(+):142014-142069	5.1
lcr-miR-N474	cuuccacuggcaucucugacau	22	NW_020855017.1_28171	cuuccacuggcaucucugacauaaugagggugccaguggugaag	44	NW_020855017.1(-):142-186	2.1
lcr-miR-N475	cucuguccgcuucaccugaagg	22	NW_020855041.1_28189	uccacaggugaagugugccagcagcucagguguagucucuguccgcuucaccugaagg	58	NW_020855041.1(+):92522-92580	5.6
lcr-miR-N476	gcuuacggccauaccacccu	20	NW_020855150.1_28212	gcuuacggccauaccacccugaauggcacccguccgucugauuucgaagcuaagcagggucaggccugguuaguacuugga	81	NW_020855150.1(+):66033-66114	0.3
lcr-miR-N477	ucuguaugccgucuuuaugaag	22	NW_020855421.1_28259	uuaugaaguuuugcagucuuuaugaagucuuuaugcagucuuuaugaagucuguaugccgucuuuaugaag	71	NW_020855421.1(+):28531-28602	4.8
lcr-miR-N478	guggcugguggcuggcggc	19	NW_020855629.1_28295	guggcugguggcuggcggcuggggcugaggaggacggcaaccccugccuacgcacgcacagcacacgcuccuccag	76	NW_020855629.1(-):5169-5245	1.5
lcr-miR-N479	uauguguuuguguguguguaga	22	NW_020855649.1_28332	ggcagaauauaaacgcauacugacuauguguuuguguguguguaga	46	NW_020855649.1(-):181174-181220	3.5
lcr-miR-N48	uuuaaaguggaaacagacaacu	22	NC_040013.1_2838	uuuaaaguggaaacagacaacuuuucagcccugucgcaaagacaggaucgcuuuccguuuccgcuuaagaaa	72	NC_040013.1(+):18508997-18509069	3.1
lcr-miR-N480	uucagucauuguuucuggucgug	23	NW_020855803.1_28351	cagcuggaaacuuugccugggaauuugugcgcucaaaaauuucagucauuguuucuggucgug	63	NW_020855803.1(+):332-395	5
lcr-miR-N481	gaaaggcucgggggcgaa	18	NW_020855822.1_28362	gaaaggcucgggggcgaagguuacagguuuacagcacccucccacccggaccucgcc	57	NW_020855822.1(+):822-879	1.2
lcr-miR-N482	ggugucuauuuacuucuugca	21	NW_020855938.1_28379	ugcaaaaaguaaauagaccuuuuauuugaauuugaaugaaggugucuauuuacuucuugca	61	NW_020855938.1(-):71265-71326	5.5
lcr-miR-N483	cccuacacgugacgucacgcu	21	NW_020856073.1_28448	cccuacacgugacgucacgcuccggguguguucacguuaacggcg	45	NW_020856073.1(+):1161-1206	0.7
lcr-miR-N484	ugugaccugcuaacagcuga	20	NW_020856111.1_28457	agcuguuagcaggucacaugacucgacagguuggucaugugaccugcuaacagcuga	57	NW_020856111.1(+):123155-123212	3.9
lcr-miR-N485	ugugaccugcuaacagcuga	20	NW_020856111.1_28482	agcuguuagcaggucacaugaccaaccugucgagucaugugaccugcuaacagcuga	57	NW_020856111.1(-):123152-123209	3.6
lcr-miR-N486	uucauggauguugaagcagguga	23	NW_020856362.1_28509	uucauggauguugaagcaggugaccucuucuuuaucuaagaggucauuacacugcaucagcucaucgucauc	72	NW_020856362.1(-):379-451	1.5
lcr-miR-N487	aaacauuaguaaguggaccuuu	22	NW_020856366.1_28516	agguccacuuacuaaugauuaacaaugugcaauuugaaacauuaguaaguggaccuuu	58	NW_020856366.1(-):1050-1108	583.6
lcr-miR-N488	gagcagguuuagcugggucugu	22	NW_020856373.1_28517	agguucagcugggucuguucuugggacuuguucuucaagagcagguuuagcugggucugu	60	NW_020856373.1(+):1111-1171	2.7
lcr-miR-N489	auuuuggauguggcaaaguuu	21	NW_020856411.1_28519	auuuuggauguggcaaaguuuccuuguauuaguuuacgggcagaucugccacauccaauaugg	63	NW_020856411.1(-):28043-28106	5.5
lcr-miR-N49	ucugucauugcuguuucauggu	22	NC_040013.1_2841	ucugucauugcuguuucaugguguauacuccugaacacaacagugaccaauc	52	NC_040013.1(+):18731116-18731168	0.1
lcr-miR-N490	uggguuggacugguuuaauccu	22	NW_020856961.1_28630	uggguuggacugguuuaauccuggguuggacugguuuaguccuggguuggacugguuuaguccugg	66	NW_020856961.1(+):85115-85181	4.2
lcr-miR-N491	uuuggcacauugacuaaggaca	22	NW_020856972.1_28649	uuuggcacauugacuaaggacagucauauguguaaugucaccaaguuacauguugccagu	60	NW_020856972.1(-):117169-117229	8
lcr-miR-N492	ucucuccaaggcgucucuucgc	22	NW_020857008.1_28659	gcagaggcguccuggagagguagagccugcgcgucucuucucucuccaaggcgucucuucgc	62	NW_020857008.1(+):8540-8602	1.4
lcr-miR-N493	cugcccuggcacugcaacugc	21	NW_020857180.1_28714	aguugcuuguaucugggaaagcuaccgcugcccuggcacugcaacugc	48	NW_020857180.1(-):7899-7947	1.6
lcr-miR-N494	uagcagcacaucauuacugguagu	24	NW_020857180.1_28715	uagcagcacaucauuacugguaguucuaucugcauugccaguaugauaugugcugcuccu	60	NW_020857180.1(-):14463-14523	5.4
lcr-miR-N495	cgcuggacagguuuggggggug	22	NW_020857208.1_28726	cucccaauccuuguaccagugucuugauacugcagugacgcuggacagguuuggggggug	60	NW_020857208.1(+):17285-17345	5.3
lcr-miR-N496	ugccugaggccgcuagagg	19	NW_020857294.1_28732	ccugcugucucagacgggcaucgaccugccacuccugccugaggccgcuagagg	54	NW_020857294.1(-):1644-1698	1
lcr-miR-N497	auccuguucgugacgcca	18	NW_020857418.1_28758	auccuguucgugacgccaaguuuugucguauauucaguggcgaunnnnnnnnnnagggaagaaaguguucaggagccucugaug	84	NW_020857418.1(+):2375-2459	1310.9
lcr-miR-N498	ucacggguauucacugaaguug	22	NW_020857908.1_28808	ucacggguauucacugaaguugcguugaaauugcaaaucgcaacaucgggaauuccuggagg	62	NW_020857908.1(+):98416-98478	1
lcr-miR-N499	ucgagaugucagaauggucuga	22	NW_020857947.1_28833	ucgagaugucagaauggucugacguugucagugucagaccauucugacaucuc	53	NW_020857947.1(-):1385-1438	5.7
lcr-miR-N5	caagaaguaaauagacaccu	20	NC_040011.1_1157	caagaaguaaauagacaccuucauucaaauucaaauuaaaggggucuauuuacuucuucca	61	NC_040011.1(-):10803662-10803723	5
lcr-miR-N50	guuguggguuuuuuuuuu	18	NC_040013.1_2887	ugucaaaacuuacaacugaagugcuccaggcguuuuuguugcuuuugguuguggguuuuuuuuuu	65	NC_040013.1(+):21846607-21846672	3.7
lcr-miR-N500	agacacaugaauaugaauacau	22	NW_020858136.1_28848	agacacaugaauaugaauacaucauuauaaauaugaauguauucauaugaauguacuua	59	NW_020858136.1(+):381-440	3.5
lcr-miR-N501	ucucagucugcugguucucg	20	NW_020858189.1_28858	aauucagcauccugacggccugguggaucaaacugucucucagucugcugguucucg	57	NW_020858189.1(+):2085-2142	1
lcr-miR-N502	acuccacuacauuuaucuga	20	NW_020858293.1_28878	aaaauguggagugaaauggaguaaaagauaggauauaauauauugugaauauuauauccuaucuuuuacuccacuacauuuaucuga	87	NW_020858293.1(+):17871-17958	0.2
lcr-miR-N503	uguacuuacuggagcugagcugg	23	NW_020858474.1_28949	uguacuuacuggagcugagcuggacucuguugacuuagucacucagagacaguaagugugu	61	NW_020858474.1(-):903-964	134.6
lcr-miR-N504	aagcaaugcauugucaacacug	22	NW_020858693.1_28981	aagcaaugcauugucaacacuguguucagugggggcggggugcugcugac	50	NW_020858693.1(-):126-176	2
lcr-miR-N505	ugagcuaacugugcuaacacug	22	NW_020858936.1_29002	ugagcuaacugugcuaacacugugcuaacucugagcuaacuguguuaacacugugcuaacucuga	65	NW_020858936.1(+):44-109	4.4
lcr-miR-N506	uuucuaauauuguggcccucu	21	NW_020859748.1_29132	uuucuaauauuguggcccucucauguauguaaaugaaguggccagaauacuagaaaca	58	NW_020859748.1(+):942-1000	5.2
lcr-miR-N507	gcuuacggccauaccacccu	20	NW_020859945.1_29168	gcuuacggccauaccacccugaaugcgccgaucugucugaucucggagcuaagcagggucaugccugguuaguua	75	NW_020859945.1(+):2804-2879	0.8
lcr-miR-N508	uccugaacagaggcgugucuca	22	NW_020860558.1_29221	uccugaacagaggcgugucucaaugagacacagagaugagacacgccuccguucaggaag	60	NW_020860558.1(-):2580-2640	415.9
lcr-miR-N509	acccuaacagaaacauugacu	21	NW_020860570.1_29223	acccuaacagaaacauugacuuugguucucaaugcaguaagugcuuuuuguugggguag	59	NW_020860570.1(+):306-365	10.8
lcr-miR-N51	ucucucccuccgucccucaccu	22	NC_040013.1_2982	ucucucccuccgucccucaccucgaaggaacuauugaaugagagggggggggguggguaggggag	65	NC_040013.1(+):26625229-26625294	1.5
lcr-miR-N510	auaugaacuuuauuaaucucucu	23	NW_020860793.1_29241	gagagauuaauaaaguucauaugagauaagauuaucucauaugaacuuuauuaaucucucu	61	NW_020860793.1(+):12730-12791	33.7
lcr-miR-N511	auaugaacuuuauuaaucucucu	23	NW_020860793.1_29274	gagagauuaauaaaguucauaugagauaaucuuaucucauaugaacuuuauuaaucucucu	61	NW_020860793.1(-):12728-12789	33.6
lcr-miR-N512	uacccggugcuguaagcuu	19	NW_020860834.1_29347	agcuaagcagggucaggccugguuaguacuuggaugggagaccgccuaggcauacccggugcuguaagcuu	71	NW_020860834.1(+):5392-5463	4750.4
lcr-miR-N513	uaccaggugcuguacgcuu	19	NW_020860834.1_29349	gggucaggccugguuaguaacuuggauggucgacuuuccgccuugggauaccaggugcuguacgcuu	67	NW_020860834.1(+):5840-5907	1.2
lcr-miR-N514	uacuuggaugggagaccgcc	20	NW_020860839.1_29381	uacuuggaugggagaccgccuaugaauaggguguuguaagcuuuuucacaucggcgggacacaccgcuucuuccaaua	78	NW_020860839.1(-):1354-1432	4.8
lcr-miR-N515	uuccaugacaccaucacuguga	22	NW_020860930.1_29412	uuccaugacaccaucacugugaucagcgucacacacacgguugucauggcgau	53	NW_020860930.1(+):1195459-1195512	4.9
lcr-miR-N516	gaggccagacgccggcucugcu	22	NW_020860930.1_29447	gaggccagacgccggcucugcugcagauguuuggccggcagagcgggcagauggucga	58	NW_020860930.1(-):839432-839490	9.4
lcr-miR-N517	ugcugucuugacccgggucuga	22	NW_020861222.1_29580	ugcugucuugacccgggucugaggcuuccacauucuccugagagucgggucgaggcauccug	62	NW_020861222.1(+):85849-85911	5.5
lcr-miR-N518	uuucuaauauuguggcccucu	21	NW_020861315.1_29630	uuucuaauauuguggcccucucauaugugaaugggguggccaaaauguuauuaaca	56	NW_020861315.1(+):2290427-2290483	5
lcr-miR-N52	uugaaagggauugaaccaa	19	NC_040013.1_2993	gguucaaucccuuucaaugcacgcuccgugcauugaaagggauugaaccaa	51	NC_040013.1(+):27251306-27251357	0.5
lcr-miR-N53	uaguuugugucauggugu	18	NC_040013.1_3010	uaguuugugucauggugugacuuugguuaguuacuaguccacgauaauacaaauaaacaaa	61	NC_040013.1(+):27890456-27890517	0
lcr-miR-N54	uggguuggauauauuaggcugc	22	NC_040013.1_3055	ucccuaauauauccaacccaccugucaguggguuggauauauuaggcugc	50	NC_040013.1(+):28586536-28586586	1.1
lcr-miR-N55	ugcaagaaguaaauagacaccu	22	NC_040013.1_3183	ugcaagaaguaaauagacaccuuuaauuugaauuugaaugaaggugucuauuuacuucuugc	62	NC_040013.1(+):36293649-36293711	6666.3
lcr-miR-N56	uggcauugcuacucuggcuaa	21	NC_040013.1_3262	uggcauugcuacucuggcuaaucauuagccagaguagcaaugccggc	47	NC_040013.1(+):40801499-40801546	4.5
lcr-miR-N57	uguaaacauccuacacucucggcgu	25	NC_040013.1_3308	uguaaacauccuacacucucggcguccgcccccugguggccgggagugggacuguuugcacug	63	NC_040013.1(+):44656073-44656136	1465.3
lcr-miR-N58	cucaccgacagcguugaauguuca	24	NC_040013.1_3441	uacagucaacggucgaugguuuugguuagagcgcaaacucaccgacagcguugaauguuca	61	NC_040013.1(+):50428607-50428668	121.4
lcr-miR-N59	uuuaaagucaggauuaagaucu	22	NC_040013.1_3550	aggcuuaauccugacuuuaagaucagaauuaugacuuuaaagucaggauuaagaucu	57	NC_040013.1(-):1083174-1083231	3.3
lcr-miR-N6	uuucuaggcuuccuguguagu	21	NC_040011.1_1217	uuucuaggcuuccuguguagucaguggauauggacuacacaggaagccuagaaaca	56	NC_040011.1(-):14703521-14703577	22
lcr-miR-N60	ucaccuggugcagaaugaca	20	NC_040013.1_3564	ucugucugcggcagggagagcuugaaucugaagcucaccuggugcagaaugaca	54	NC_040013.1(-):1710680-1710734	1.2
lcr-miR-N61	ugcaccuuucacgccugauu	20	NC_040013.1_3609	ugcaccuuucacgccugauuuaacauaaaaaaucaggcaugaaacgugcaaa	52	NC_040013.1(-):3874195-3874247	5.1
lcr-miR-N62	ggggauguagcucagugg	18	NC_040013.1_3631	ggggauguagcucagugguagagcgugugcuucgcauguauaagguccuggguucaauccccagcaucu	69	NC_040013.1(-):5796958-5797027	0
lcr-miR-N63	ggggauguagcucagugg	18	NC_040013.1_3647	ggggauguagcucagugguagagcgcgugcuucgcauguaugagguccuggguucaauccccagcaucu	69	NC_040013.1(-):5970754-5970823	0.7
lcr-miR-N64	ggggauguagcucagugg	18	NC_040013.1_3648	cauggacaccccugcuuuuaucccagagauccagguguuugggaagguugcacauggggauguagcucagugg	73	NC_040013.1(-):5970805-5970878	5.2
lcr-miR-N65	uuaagagcaagucacagau	19	NC_040013.1_3834	uucaggcuuguuuauaacuggggccuccuggcaacacucccaggucgcucuuuuaagagcaagucacagau	71	NC_040013.1(-):15235139-15235210	3.9
lcr-miR-N66	guuccaauguauacuguucaua	22	NC_040013.1_3839	ugaacagcuuucauuggaccuauuucuuugguaaaaaguaguuccaauguauacuguucaua	62	NC_040013.1(-):15569963-15570025	20.4
lcr-miR-N67	uaaacgaagccuuuuagaacu	21	NC_040013.1_3863	uaaacgaagccuuuuagaacucauuuguguaaugaguuauaaaaggcuucguuuacc	57	NC_040013.1(-):17790156-17790213	5.6
lcr-miR-N68	ggugugacugugagcaug	18	NC_040013.1_3874	ucccacaguccaaagacuugcaguuagucaguuaauuugugacuaauugcucguaggugugacugugagcaug	73	NC_040013.1(-):17884488-17884561	1.6
lcr-miR-N69	accauguuugacuguaaggacc	22	NC_040013.1_3943	accauguuugacuguaaggaccguguuuuucgcugaugugguccguacagucaaacguggagg	63	NC_040013.1(-):22745978-22746041	2
lcr-miR-N7	aacuccgucagagucaacucug	22	NC_040011.1_1304	aacuccgucagagucaacucugucagagucaacccugucagagucaacucugucagagucaacuccgacagagucaacuccaucagagucaa	92	NC_040011.1(-):21507821-21507913	5.4
lcr-miR-N70	cuuucgguuaucuagcuuuaug	22	NC_040013.1_3975	cuuucgguuaucuagcuuuaugacgagcagaacacucauacagcuagauaaccaaagauaa	61	NC_040013.1(-):26661178-26661239	10.4
lcr-miR-N71	uugaaagggauugaaccaa	19	NC_040013.1_3986	gguucaaucccuuucaaugcacggagcgugcauugaaagggauugaaccaa	51	NC_040013.1(-):27251303-27251354	0.5
lcr-miR-N72	guuccugcugaacugagccagu	22	NC_040013.1_4075	guuccugcugaacugagccagugguucuguaggacugauuaucagcucaguaggcacagg	60	NC_040013.1(-):32108902-32108962	5.2
lcr-miR-N73	guuccugcugaacugagccagu	22	NC_040013.1_4076	uguguucugguucggugaugaaugggcuggacuccuguuccugcugaacugagccagu	58	NC_040013.1(-):32108940-32108998	0.3
lcr-miR-N74	ugucuauuuacuucuugcaugu	22	NC_040013.1_4173	ugcaagaaguaaauggacaccuuuaauuugaauuugaaugaagcugucuauuuacuucuugcaugu	66	NC_040013.1(-):38316165-38316231	238.8
lcr-miR-N75	ugaugacagugauggaggag	20	NC_040013.1_4194	ccuacugccaucacaguguucacugcuaaaaucaugccagugaugacagugauggaggag	60	NC_040013.1(-):39322139-39322199	4.6
lcr-miR-N76	ucucccucuuugcuuccacaga	22	NC_040013.1_4195	uggaggcaaacaggaagaauaucucuuaugaaagauaauuucucccucuuugcuuccacaga	62	NC_040013.1(-):40342334-40342396	1.6
lcr-miR-N77	aaugugcuucaacugacucuaa	22	NC_040013.1_4204	augguagaaguuacaguuuugcauuuuuuuuaaaugugcuucaacugacucuaa	54	NC_040013.1(-):41061266-41061320	3.7
lcr-miR-N78	auccugccgacaacgcca	18	NC_040013.1_4241	auccugccgacaacgccagguuuguggcggcacgggggguua	42	NC_040013.1(-):43641515-43641557	0.2
lcr-miR-N79	cuacauuaaugaaaagaacaaug	23	NC_040013.1_4309	uugugauuuccaauaauugagacagugauucugaaagcugucuacauuaaugaaaagaacaaug	64	NC_040013.1(-):48333854-48333918	2.6
lcr-miR-N8	ugggucggcuuggaaaggcuc	21	NC_040011.1_1315	ugggucggcuuggaaaggcucggggucgaaggugccucacagcuccggccgcgagcuuuacagcgcccuccugcccggaccucgccacuucccggg	96	NC_040011.1(-):22045622-22045718	1.6
lcr-miR-N80	aucacauugccagggauuacuaca	24	NC_040014.1_4419	gggucucuggcaugaugauuugggacagaaaauaaaaaaucacauugccagggauuacuaca	62	NC_040014.1(+):4800946-4801008	501.6
lcr-miR-N81	uucagcagucgacuaagcucug	22	NC_040014.1_4476	aagaacuuagccacugugaacaaaucgcuaagacucccuguucagcagucgacuaagcucug	62	NC_040014.1(-):4801237-4801299	2.6
lcr-miR-N82	ucugggucugccucugggucu	21	NC_040015.1_4507	uuccaagguuuucccaggcuagaugggcuauaaagucccuccgguaaauucugggucugccucugggucu	70	NC_040015.1(+):1062330-1062400	5.1
lcr-miR-N83	ucugggucugccucugggucu	21	NC_040015.1_4508	ucugggucugccucugggucuucugccagcagaacaugccggaacagauccaaaggaag	59	NC_040015.1(+):1062379-1062438	5.2
lcr-miR-N84	uucucgugagcacaagauacu	21	NC_040015.1_4598	cuucuggugcgcacaagauacuuucucgugagcacaagauacu	43	NC_040015.1(-):5044922-5044965	0.1
lcr-miR-N85	gcuaccaacagucugaau	18	NC_040015.1_4601	gcuaccaacagucugaaugaguauacaggggcugugacgucauacaucagcuucugugaggacuguuguguuc	73	NC_040015.1(-):5141846-5141919	5
lcr-miR-N86	ugcaagaaguaaauagacaccu	22	NC_040016.1_4689	ugcaagaaguaaauagacaccuuuaauuugaauuugaaugaaggugucuauuugcuucuugcaugu	66	NC_040016.1(+):3076437-3076503	6569.1
lcr-miR-N87	augaugauaucucuuguaguagu	23	NC_040016.1_4839	uacaagacauauuaucauuacuaaggccuaaguaaugaugauaucucuuguaguagu	57	NC_040016.1(+):7909790-7909847	5
lcr-miR-N88	uugacaaauucuguagccagccu	23	NC_040016.1_4844	uugacaaauucuguagccagccucaaguggucauucgagguacugcaguuuuugucacuu	60	NC_040016.1(+):8050411-8050471	4.7
lcr-miR-N89	ugcacugcacagccaacucu	20	NC_040016.1_4852	ugcacugcacagccaacucucacagaaucaaaaaaagaaauaugucagaguuggcugugcagugcaaa	68	NC_040016.1(+):8551489-8551557	5.5
lcr-miR-N9	uguacuuacuggagcugagcugg	23	NC_040011.1_1347	uguacuuacuggagcugagcuggacucuguugacuuagucacucagagacaguaagugugu	61	NC_040011.1(-):24261675-24261736	134.6
lcr-miR-N90	uaacaagacuucauaacugga	21	NC_040016.1_4940	uaacaagacuucauaacuggaauaagauuuguaguuaugaagucuugugaca	52	NC_040016.1(+):11914325-11914377	0.1
lcr-miR-N91	aagccagaagauuugacaguuu	22	NC_040016.1_4986	aagccagaagauuugacaguuuuauucauaaauaaaacugucaaaucuucuggcuuua	58	NC_040016.1(+):14649294-14649352	0
lcr-miR-N92	gcugacuguaaacacacagg	20	NC_040016.1_4996	gcugacuguaaacacacaggcuguauuaugucaggagagaguguguguguuuacaaugaacag	63	NC_040016.1(+):15319462-15319525	4.7
lcr-miR-N93	gcucugggucggcuuguaaagg	22	NC_040016.1_5104	gcucugggucggcuuguaaaggcucgagggcgaagcugcgagcauacuucaagcugaaagcuaaugaucug	71	NC_040016.1(+):19390795-19390866	5.4
lcr-miR-N94	ucugggucggcuuggaaa	18	NC_040016.1_5129	ucugggucggcuuggaaagcgcccgcccacccggacc	37	NC_040016.1(+):21184170-21184207	1551.4
lcr-miR-N95	uaacugugacaccugcugaca	21	NC_040016.1_5134	uaacugugacaccugcugacaguguuuccaagggucagcaggugucacaguuaca	55	NC_040016.1(+):21644226-21644281	23.3
lcr-miR-N96	uauaacacacugugagcu	18	NC_040016.1_5177	cucacaguguguuauaacaguccgugcaguuauaacacacugugagcu	48	NC_040016.1(+):22980352-22980400	3.6
lcr-miR-N97	uccugugucgacugguuuggca	22	NC_040016.1_5199	ccaaaaccagucgacacaggaugcagucagccauccugugucgacugguuuggca	55	NC_040016.1(+):23148313-23148368	0.6
lcr-miR-N98	ugcugcugcugacgcucuga	20	NC_040016.1_5237	ugcugcugcugacgcucugauuggaggacgagugguucaccgccaggcgagcagcagcacg	61	NC_040016.1(+):23237399-23237460	0.1
lcr-miR-N99	guuuagguggucuugacua	19	NC_040016.1_5249	gucuugacuuggccucaacugagucaaaaucuuggucuugucccgagacucuuugguccugaucauggcuuugucucaguuuagguggucuugacua	97	NC_040016.1(+):24282120-24282217	0.2

## Sheet: Known miRNAs
Table S1 Overview information of novel miRNAs and known miRNAs
miRNA ID	miRNA sequence	miRNA length	Pre-miRNA ID	Pre-miRNA seq	pre-miRNA length	pre position
abu-let-7f	UGAGGUAGUAGAUUGUGUAGUU	22	abu-let-7f	UGAGGUAGUAGAUUGUGUAGUUUUAGGGUAGUGAUUUUGCCCUCUUUAGGAGAUAACUAUACAAUCUAUUGCCUUCCC	78	JH425848.1(-):317417-317438
abu-miR-10545-3p	CUGCUCAGGUGUGGGACCAUA	21	abu-mir-10545	UAAGUCUCACACCAGUGCAAAACAAAAAUCAUGACGCUGCUCAGGUGUGGGACCAUAA	58	JH425490.1(-):63415-63472
abu-miR-144	GGAUAUCAUCUUAUACUGUAAGU	23	abu-mir-144	GGAUAUCAUCUUAUACUGUAAGUUUAAAAAAGAGACACUACAGUAUAGAUGAUGUACU	58	JH425418.1(+):516936-516993
abu-miR-146	UGAGAACUGAAUUCCAUAGAUG	22	abu-mir-146	UGAGAACUGAAUUCCAUAGAUGGUGACAUCUUCAGGUGUCAUCUAUGGGCUCAGUUCUUCU	61	JH425615.1(-):371298-371358
abu-miR-15c-5p	UAGCAGCACAUCAUGUUUUGC	21	abu-mir-15c	UAGCAGCACAUCAUGUUUUGCAGAUGUGCUGAAUCGCUUCAAAUCAUCAUGUGCUGCCACC	61	JH425774.1(-):58084-58144
abu-miR-24c	UGGCUCAGUCCAGCAGGAACAA	22	abu-mir-24c	UGCCUACUGAACUGGAUUCAGUGUGUCUUUGCAGAACUGGCUCAGUCCAGCAGGAACAA	59	JH425529.1(-):400872-400930
abu-miR-27d-5p	CAGAGCUUAGUUGACUGCUGACC	23	abu-mir-27d	CAGAGCUUAGUUGACUGCUGACCAGGGAGUCUUGAAUAUUUGUUCACAGUGGCUAAGUUCGUC	63	JH425365.1(-):1529640-1529702
abu-miR-451	AAACCGUUACCAUUACUGAG	20	abu-mir-451	AAACCGUUACCAUUACUGAGUUUUAGUAAUGGUAAGGGUUCUA	43	JH425418.1(+):517074-517116
abu-miR-457	UAGCAGCACAUCAUUACUGGUA	22	abu-mir-457	UAGCAGCACAUCAUUACUGGUAUUUUUCACUGCAUUACCAGUAUGUUAUGUGCUGCUUCU	60	JH425774.1(-):57023-57082
abu-miR-727b-3p	GUUGAGGCGAGUUGAAGACUUU	22	abu-mir-727b	CAGUCUUCAGUUCCUCCCAGCCCAUAACUAUGGCAGCAAUGUGUUGAGGCGAGUUGAAGACUUU	64	JH425462.1(-):961940-962003
abu-miR-731-5p	AAUGACACGUUUUCUCCCGGAUUG	24	abu-mir-731	AAUGACACGUUUUCUCCCGGAUUGCUGUGAGCAGGAAACGCAACCGGGAAUUUCGUGUCAGCC	63	JH425555.1(-):855762-855824
abu-miR-737	GUUUUUUUAGGUUUUGAUUUUU	22	abu-mir-737	GUUUUUUUAGGUUUUGAUUUUUGUAGCGUUGGACGAGAAAAUCAAAACCUAAAGAAAAUA	60	JH425891.1(-):80037-80096
abu-miR-7552	UUACAAUUAAAGGAUAUUUCU	21	abu-mir-7552	UUACAAUUAAAGGAUAUUUCUUGCGAAUGACUCAGAAAUGUCUUUUAAUUGUUCGGU	57	JH425463.1(-):354605-354661
dre-let-7a	UGAGGUAGUAGGUUGUAUAGUU	22	dre-let-7a-1	GACGGUGGGAUGAGGUAGUAGGUUGUAUAGUUUUAGGGUCACACCCACACUGGGAGAUAACUAUACAACCUACUGUCUUUCUCAAAGUC	89	chr11(-):27503232-27503320
dre-let-7a	UGAGGUAGUAGGUUGUAUAGUU	22	dre-let-7a-5	GUACGUGUUUUUGGUGUCUGGACAAGGUGAGGUAGUAGGUUGUAUAGUUUGGUGGGAGGGAUCAAACCCUGUUCAGCUGAUAACUAUACAGUCUAUUGCCUUCCUUGUGUCACCUAAGGUCUGC	124	chr23(-):5431196-5431319
dre-let-7a	UGAGGUAGUAGGUUGUAUAGUU	22	dre-let-7a-2	GCCCCCAGGCUGAGGUAGUAGGUUGUAUAGUUUAGAAUAACAUCACUGGAGAUAACUGUACAACCUCCUAGCUUUCCCUGAGAU	84	chr15(+):21437876-21437959
dre-let-7a	UGAGGUAGUAGGUUGUAUAGUU	22	dre-let-7a-6	CACAGUGAACCUGUGUGUUUCUUCAAGGUGAGGUAGUAGGUUGUAUAGUUUGUGGGAAGGAUCACAUCCUAUUCAGGUGAUAACUAUACAGUCUAUUGCCUUCCCUGAGAGACACAAUGACCACGAGUG	129	chr6(-):54506458-54506586
dre-let-7a	UGAGGUAGUAGGUUGUAUAGUU	22	dre-let-7a-3	GAGACUGUCGUUUGGGGUGAGGUAGUAGGUUGUAUAGUUUGAGGGUUUAACCCUUGCUGUCAGAUAACUAUACAACUUACUGUCUUUCCCGAAGUGGCCGUAGUGUC	107	chr4(-):18654155-18654261
dre-let-7a	UGAGGUAGUAGGUUGUAUAGUU	22	dre-let-7a-4	GCGAUGUCUCGGGAUGAGGUAGUAGGUUGUAUAGUUUAGAGUUACAACACGGGAGAUAACUGUACAGCCUCCUAGCUUUCCUCGAGCAGACGC	93	chr5(+):29990452-29990544
dre-let-7b	UGAGGUAGUAGGUUGUGUGGUU	22	dre-let-7b	UCGGACAGGGUGAGGUAGUAGGUUGUGUGGUUUCAGGGUUGUGUUUUUGCCCCAUCAGGAGUUAACUAUACAACCUACUGCCUUCCCUGAAGGG	94	chr4(-):18653210-18653231
dre-let-7c-3p	CUGUACAACCUUCUAGCUUUCC	22	dre-let-7c-2	GUGUGCAUCCAGGCUGAGGUAGUAGGUUGUAUGGUUUCGAAUGACACCAUGGGAGUUAACUGUACAACCUUCUAGCUUUCCUUGGAGUACAC	92	chr10(-):38072077-38072168
dre-let-7c-3p	CUGUACAACCUUCUAGCUUUCC	22	dre-let-7c-1	CUGAGAGUGUGUGCAUCCAGGCUGAGGUAGUAGGUUGUAUGGUUUAGAAUUUUGCCCUGGGAGUUAACUGUACAACCUUCUAGCUUUCCUUGGAGCUCACAAGCCAG	107	chr15(+):29795823-29795929
dre-let-7c-5p	UGAGGUAGUAGGUUGUAUGGUU	22	dre-let-7c-2	GUGUGCAUCCAGGCUGAGGUAGUAGGUUGUAUGGUUUCGAAUGACACCAUGGGAGUUAACUGUACAACCUUCUAGCUUUCCUUGGAGUACAC	92	chr10(-):38072077-38072168
dre-let-7c-5p	UGAGGUAGUAGGUUGUAUGGUU	22	dre-let-7c-1	CUGAGAGUGUGUGCAUCCAGGCUGAGGUAGUAGGUUGUAUGGUUUAGAAUUUUGCCCUGGGAGUUAACUGUACAACCUUCUAGCUUUCCUUGGAGCUCACAAGCCAG	107	chr15(+):29795823-29795929
dre-let-7d-3p	CUGUACAACCUUCUAGCUUUCC	22	dre-let-7d-2	CGCUGCAGGCUGAGGUAGUUGGUUGUAUGGUUUUGCAUCAUAAUCAGCCUGGAGUUAACUGUACAACCUUCUAGCUUUCCCUGCGGUG	88	chr19(+):9429857-9429944
dre-let-7d-3p	CUGUACAACCUUCUAGCUUUCC	22	dre-let-7d-1	UGUGCGUUGCGGUGUGAGGUAGUUGGUUGUAUGGUUUUGCAUAAUAAACAGCCCGGAGUUAACUGUACAACCUUCUAGCUUUCCCUGCGGCUGCACG	97	chr16(+):24881122-24881218
dre-let-7d-5p	UGAGGUAGUUGGUUGUAUGGUU	22	dre-let-7d-1	UGUGCGUUGCGGUGUGAGGUAGUUGGUUGUAUGGUUUUGCAUAAUAAACAGCCCGGAGUUAACUGUACAACCUUCUAGCUUUCCCUGCGGCUGCACG	97	chr16(+):24881122-24881218
dre-let-7d-5p	UGAGGUAGUUGGUUGUAUGGUU	22	dre-let-7d-2	CGCUGCAGGCUGAGGUAGUUGGUUGUAUGGUUUUGCAUCAUAAUCAGCCUGGAGUUAACUGUACAACCUUCUAGCUUUCCCUGCGGUG	88	chr19(+):9429857-9429944
dre-let-7e	UGAGGUAGUAGAUUGAAUAGUU	22	dre-let-7e	GCUGUUCUUGGGGCUGAGGUAGUAGAUUGAAUAGUUGUGGAGCCCUGCGCUCUCUCUCUGAGAUAACUAUACAAUCUACUGUCUUUCCUAAGGCGACAGC	100	chr23(-):5431482-5431503
dre-let-7f	UGAGGUAGUAGAUUGUAUAGUU	22	dre-let-7f	UGGUAAUGCUUGUGCAGUGUGAGGUAGUAGAUUGUAUAGUUGUAGGGUAGUGAUUUUAUCCUGUGUAGAAGAUAACUAUACAAUCUAUUGCCUUCCCUGAGGGGCAGAAAUACACA	116	chr11(-):27503092-27503113
dre-let-7g	UGAGGUAGUAGUUUGUAUAGUU	22	dre-let-7g-2	GUGGACUGUGGGAUGAGGUAGUAGUUUGUAUAGUUUUAGGAUCACACCAGAUCUGGGAGAUAACUAUACAGUCUACUGUCUUUCCCACGGUUACCGC	97	KZ115692.1(+):496642-496738
dre-let-7g	UGAGGUAGUAGUUUGUAUAGUU	22	dre-let-7g-1	GGGGGCUGUGGAAUGAGGUAGUAGUUUGUAUAGUUUGGGAUCACACCAGAUCUGGGAGAUAACUAUACAGCCUACUGUCUUUCUCACAGCUGCUCC	96	chr23(-):18382456-18382551
dre-let-7h	UGAGGUAGUAAGUUGUGUUGUU	22	dre-let-7h	GAGUUGGCUGUGUUGUGGUGAGGUAGUAAGUUGUGUUGUUGUUGGGGAUCAGUAUAGUAUGGCCCUUGAAGGAGAUAACUAUACAAUUUACUGCCUUCCAUAAUGCAGACUCUC	114	KZ115692.1(+):496964-496985
dre-let-7i	UGAGGUAGUAGUUUGUGCUGUU	22	dre-let-7i	GUGUACUGGCUGAGGUAGUAGUUUGUGCUGUUGGUUGGGAUGUGACAUUGCCCGUUAUGGAGAUGACUGCGCAAGCUACUCCCUUGCCAGUGCUG	95	chr25(-):1629718-1629739
dre-let-7j	UGAGGUAGUUGUUUGUACAGUU	22	dre-let-7j	GGUUGAGGUAGUUGUUUGUACAGUUUUUAGGGUCUGUUAUUCUGCCCUGUUAAGGAGCUAACUGUACAGACUACUGCCUUGCC	83	chr6(+):41454794-41454815
dre-miR-1	UGGAAUGUAAAGAAGUAUGUAU	22	dre-mir-1-1	GCCCAUAUAUCCCGCUUGGUAGACAUACUUCUUUAUAUGCCCAUAUGAACAAGAGCAGCUAUGGAAUGUAAAGAAGUAUGUAUCCCAGGUGAGAGAAAAACGGGGC	106	chr23(-):7210157-7210262
dre-miR-1	UGGAAUGUAAAGAAGUAUGUAU	22	dre-mir-1-2	GCCUACUUGGUGUACAUACUUCUUUAUGUGCCCAUAUGAACAUAUAAAAGCUAUGGAAUGUAAAGAAGUAUGUAUUCUUGGUCAGGU	87	chr2(-):4116314-4116400
dre-miR-100-2-3p	CAAGCUCGUGUCUAUAGGUAUG	22	dre-mir-100-2	AGCUGCCACAAACCCGUAGAUCCGAACUUGUGGUGUCUCUGUGCACAAGCUCGUGUCUAUAGGUAUGUGUCUGCG	75	chr5(+):29990147-29990221
dre-miR-100-3p	CAAGCUUGUAUCUAUAGGUAUC	22	dre-mir-100-1	GAAGAGACCUGCCUGCUGACACAAACCCGUAGAUCCGAACUUGUGGUGACUGUCCACACAAGCUUGUAUCUAUAGGUAUCUGUCUGUGUGGCCUUC	96	chr15(+):21437633-21437728
dre-miR-100-5p	AACCCGUAGAUCCGAACUUGUG	22	dre-mir-100-1	GAAGAGACCUGCCUGCUGACACAAACCCGUAGAUCCGAACUUGUGGUGACUGUCCACACAAGCUUGUAUCUAUAGGUAUCUGUCUGUGUGGCCUUC	96	chr15(+):21437633-21437728
dre-miR-100-5p	AACCCGUAGAUCCGAACUUGUG	22	dre-mir-100-2	AGCUGCCACAAACCCGUAGAUCCGAACUUGUGGUGUCUCUGUGCACAAGCUCGUGUCUAUAGGUAUGUGUCUGCG	75	chr5(+):29990147-29990221
dre-miR-101a	UACAGUACUGUGAUAACUGAAG	22	dre-mir-101a	GGCUGCCCUGGUUCAGUUAUCACAGUGCUGAUGCUGUCCAUCUUAAAGGUACAGUACUGUGAUAACUGAAGGAUGGCUGCC	81	chr6(+):31365446-31365526
dre-miR-101b	UACAGUACUAUGAUAACUGAAG	22	dre-mir-101b	GCUCCUCCGUCAUGAAUUGUCCAUUUUCAGUUAUCAUGGUACCGGUGCUGUGUGCCUGUCAAGUACAGUACUAUGAUAACUGAAGAUUGACGGUGCCAAACAUCAGUGGAGU	112	chr5(-):1837149-1837260
dre-miR-103	AGCAGCAUUGUACAGGGCUAUGA	23	dre-mir-103	UUGCCCUGGUCUGUCAGCCUCUUUACGGUGCUGCCUUGUGGAAUCUGGAUCAAGCAGCAUUGUACAGGGCUAUGAGAGACCCGGGCCC	88	chr13(+):15223296-15223383
dre-miR-107a-3p	AGCAGCAUUGUACAGGGCUAUCA	23	dre-mir-107a	UCUGUGUGCUCUGAGCUUCUUUACAGUGUUGUCUUGUGGCAUGGAGAUCAAGCAGCAUUGUACAGGGCUAUCACAGCACACUGAACAGC	89	chr12(+):16960693-16960781
dre-miR-107a-5p	AGCUUCUUUACAGUGUUGUCUUG	23	dre-mir-107a	UCUGUGUGCUCUGAGCUUCUUUACAGUGUUGUCUUGUGGCAUGGAGAUCAAGCAGCAUUGUACAGGGCUAUCACAGCACACUGAACAGC	89	chr12(+):16960693-16960781
dre-miR-107b	AGCAGCAUUGUACAGGGCUUU	21	dre-mir-107b	UCUGGCCACUCUGGGCUUCUCUACAGUGUUGCCUUGUAGCCUGGUGAUCAAGCAGCAUUGUACAGGGCUUUCAGCGUGUACAGAAC	86	KZ115525.1(+):591133-591218
dre-miR-10a-3p	CAAAUUCGUGUCUUGGGGAAUA	22	dre-mir-10a	UGUCUGUCAUCUAUAUAUACCCUGUAGAUCCGAAUUUGUGUGAAUAUACAGUCGCAAAUUCGUGUCUUGGGGAAUAUGUAGUUGACAUAAACACAACGC	99	KZ115384.1(+):38985-39083
dre-miR-10a-5p	UACCCUGUAGAUCCGAAUUUGU	22	dre-mir-10a	UGUCUGUCAUCUAUAUAUACCCUGUAGAUCCGAAUUUGUGUGAAUAUACAGUCGCAAAUUCGUGUCUUGGGGAAUAUGUAGUUGACAUAAACACAACGC	99	KZ115384.1(+):38985-39083
dre-miR-10b-2-3p	CAAAUACGUCUCUACAGGAAU	21	dre-mir-10b-2	GUAGUCGUCUAUAUGUACCCUGUAGAACCGAAUUUGUGUCCAAAACAUCAAAAUCGCAAAUACGUCUCUACAGGAAUACAUGGGCGACGUAA	92	chr23(+):36130001-36130092
dre-miR-10b-3p	ACAGAUUCGAUUCUAGGGGAGU	22	dre-mir-10b-1	GUCUAUAUAUACCCUGUAGAACCGAAUUUGUGUGAAAAAAUAACAUUCACAGAUUCGAUUCUAGGGGAGUAUAUGGUC	78	chr9(-):1952956-1953033
dre-miR-10b-5p	UACCCUGUAGAACCGAAUUUGUG	23	dre-mir-10b-1	GUCUAUAUAUACCCUGUAGAACCGAAUUUGUGUGAAAAAAUAACAUUCACAGAUUCGAUUCUAGGGGAGUAUAUGGUC	78	chr9(-):1952956-1953033
dre-miR-10b-5p	UACCCUGUAGAACCGAAUUUGUG	23	dre-mir-10b-2	GUAGUCGUCUAUAUGUACCCUGUAGAACCGAAUUUGUGUCCAAAACAUCAAAAUCGCAAAUACGUCUCUACAGGAAUACAUGGGCGACGUAA	92	chr23(+):36130001-36130092
dre-miR-10c-3p	AAAUUCGUAUCUAGGGGAGUA	21	dre-mir-10c	CCUGUCAUCUAUAUAUACCCUGUAGAUCCGGAUUUGUGUAAACAGACGCACAGUCACAAAUUCGUAUCUAGGGGAGUAUGUAGUUGAUGUAUAGG	95	chr3(+):23720651-23720745
dre-miR-10c-5p	UACCCUGUAGAUCCGGAUUUGU	22	dre-mir-10c	CCUGUCAUCUAUAUAUACCCUGUAGAUCCGGAUUUGUGUAAACAGACGCACAGUCACAAAUUCGUAUCUAGGGGAGUAUGUAGUUGAUGUAUAGG	95	chr3(+):23720651-23720745
dre-miR-10d-5p	UACCCUGUAGAACCGAAUGUGUG	23	dre-mir-10d	UGGAAGCUUUGUUCCGUCGUCUAUAUAUACCCUGUAGAACCGAAUGUGUGUUUACACAGCAAAUUCACAGAUUCGGUUUUAGGGGAGUAUAUGGACGAUGCAAAAACGUCUGCUUUCA	118	chr6(+):10867024-10867141
dre-miR-122	UGGAGUGUGACAAUGGUGUUUG	22	dre-mir-122	UCCAGAGCUGUGGAGUGUGACAAUGGUGUUUGUAUCAUCUGUCGUCAAACGCCAUUAUCACACUAAAUAGCCACGG	76	chr21(-):10881423-10881498
dre-miR-124-3p	UAAGGCACGCGGUGAAUGCCAA	22	dre-mir-124-4	GGUUUUUGCUCUUUGUGUUCACAGUGGACCUUGAUUUAAUUUCAAUACAAUUAAGGCACGCGGUGAAUGCCAAGAGAGAAGCC	83	chr17(+):27402261-27402343
dre-miR-124-3p	UAAGGCACGCGGUGAAUGCCAA	22	dre-mir-124-2	CCUGCUUUUCUUCGUGUUCACAGCGGACCUUGAUUUAAAUGUCCAUACAAUUAAGGCACGCGGUGAAUGCCAAGAGAGAUGGC	83	chr20(-):38905531-38905613
dre-miR-124-3p	UAAGGCACGCGGUGAAUGCCAA	22	dre-mir-124-5	GGGUUUUGCUCGUGCGUUCUUUUUGAGUUCUCGCUCUGCGUGUUCACAGCGGACCUUGAUUUAAUGUCCAUACAAUUAAGGCACGCGGUGAAUGCCAAGAGAAGAAUCUCUCCAGCAACGAGUUUGCGC	129	chr23(+):17783413-17783541
dre-miR-124-3p	UAAGGCACGCGGUGAAUGCCAA	22	dre-mir-124-3	GGCUCUGUGGGAUUUCAGACUCUGGCUUUCCGUGUUCACAGCGGACCUUGAUUUAAUGUCUUACAAUUAAGGCACGCGGUGAAUGCCAAGAGCGGAGCCUUUUAACAUCAGCAGGCC	117	chr24(+):24455632-24455748
dre-miR-124-3p	UAAGGCACGCGGUGAAUGCCAA	22	dre-mir-124-1	GGCUCUCGCUGUACGUGUUCACAGUGGACCUUGAUUUAUUGUAUUUCAAUUAAGGCACGCGGUGAAUGCCAACAGCACAGCC	82	chr2(-):26645317-26645398
dre-miR-124-3p	UAAGGCACGCGGUGAAUGCCAA	22	dre-mir-124-6	GGGUGGUGACACAGGCCCGCCACUCUGCGUGUUCACGGCGGACCUUGAUUUAAUAUCCAUACAAUUAAGGCACGCGGUGAAUGCCAAGAGAGGGGUCUUAAAACGACAAACCC	113	chr8(-):23122762-23122874
dre-miR-124-4-5p	UGUGUUCACAGUGGACCUUGAU	22	dre-mir-124-4	GGUUUUUGCUCUUUGUGUUCACAGUGGACCUUGAUUUAAUUUCAAUACAAUUAAGGCACGCGGUGAAUGCCAAGAGAGAAGCC	83	chr17(+):27402261-27402343
dre-miR-125a	UCCCUGAGACCCUUAACCUGUG	22	dre-mir-125a-1	GUAUGUCUCUUUGUCCCUGAGACCCUUAACCUGUGAGGUCAAACUAGGUCACAGGUGAGGUCCUCAGGAACAGGGCUGCAUGC	83	chr16(+):24898171-24898253
dre-miR-125a	UCCCUGAGACCCUUAACCUGUG	22	dre-mir-125a-2	GAUCAGUCCAAAUCGAUGUAUGUCUGUGUCCCUGAGACCCUUAACCUGUGAUGUCUUCCAAGGUCACAGGUGAGGUCCUUGGGAACACGGCUGUAUAUGAUGACGUC	107	chr19(+):9443772-9443878
dre-miR-125b-1-3p	ACGGGUUAGGUUCUUGGGAGCU	22	dre-mir-125b-1	UUCUGUUGCAGGUUGGCGGUUGGUCUGCAAAUGUGCCUCUCACAAUCCCUGAGACCCUAACUUGUGACGUUUUCCUGUUAUGUGCACGGGUUAGGUUCUUGGGAGCUGAGAGGGGUGCUCUGUCAUCAGCCCGCCGGCGUCGGAA	145	chr15(+):21447656-21447800
dre-miR-125b-2-3p	CGGGUUGGGUUCUCGGGAGCU	21	dre-mir-125b-2	GUGCCCCUCUCCUUCCCUGAGACCCUAACUUGUGACGUUCUGCUUCGAUGUCCACGGGUUGGGUUCUCGGGAGCUGUGAGAGGCAC	86	chr5(+):29998762-29998847
dre-miR-125b-5p	UCCCUGAGACCCUAACUUGUGA	22	dre-mir-125b-2	GUGCCCCUCUCCUUCCCUGAGACCCUAACUUGUGACGUUCUGCUUCGAUGUCCACGGGUUGGGUUCUCGGGAGCUGUGAGAGGCAC	86	chr5(+):29998762-29998847
dre-miR-125b-5p	UCCCUGAGACCCUAACUUGUGA	22	dre-mir-125b-1	UUCUGUUGCAGGUUGGCGGUUGGUCUGCAAAUGUGCCUCUCACAAUCCCUGAGACCCUAACUUGUGACGUUUUCCUGUUAUGUGCACGGGUUAGGUUCUUGGGAGCUGAGAGGGGUGCUCUGUCAUCAGCCCGCCGGCGUCGGAA	145	chr15(+):21447656-21447800
dre-miR-125b-5p	UCCCUGAGACCCUAACUUGUGA	22	dre-mir-125b-3	CCCGUGCGGCCACCGCUGCACUCCUCCUGGUCCCUGAGACCCUAACUUGUGAGCUUUGUGUGCUAAAAAUCACAGGUUAAGCUCUUGGGACCUGGGCAGAGGGCAAAAGCACUGG	115	chr10(-):38051652-38051766
dre-miR-125c-5p	UCCCUGAGACCCUAACUCGUGA	22	dre-mir-125c	GCUCUCCUCCUGUUCCCUGAGACCCUAACUCGUGAGGUCUUUUUCCAAAAUCACGGGUCAGGAGCUUGGGAGACAGGUGGAGGGC	85	chr15(+):29800968-29801052
dre-miR-126a-3p	UCGUACCGUGAGUAAUAAUGC	21	dre-mir-126a	GAGCCAUUUUAACUGCUUCACAGUCCAUUAUUACUUUUGGUACGCGCUAGGCCAGACUCAAACUCGUACCGUGAGUAAUAAUGCACUGUGGCAGUGGGUUU	101	chr8(-):11548419-11548519
dre-miR-126a-5p	CAUUAUUACUUUUGGUACGCG	21	dre-mir-126a	GAGCCAUUUUAACUGCUUCACAGUCCAUUAUUACUUUUGGUACGCGCUAGGCCAGACUCAAACUCGUACCGUGAGUAAUAAUGCACUGUGGCAGUGGGUUU	101	chr8(-):11548419-11548519
dre-miR-126b-3p	UCGUACCGUGAGUAAUAGUGCA	22	dre-mir-126b	GAGUCUUACCGGCCUCACGGUUCAUUAUUACUUUUGGUACGCGCUAUGCCACUCUCAACUCGUACCGUGAGUAAUAGUGCACUGUGACUGGUGAACACAACUA	103	chr21(-):7240227-7240329
dre-miR-126b-5p	CAUUAUUACUUUUGGUACGCG	21	dre-mir-126b	GAGUCUUACCGGCCUCACGGUUCAUUAUUACUUUUGGUACGCGCUAUGCCACUCUCAACUCGUACCGUGAGUAAUAGUGCACUGUGACUGGUGAACACAACUA	103	chr21(-):7240227-7240329
dre-miR-128-3p	UCACAGUGAACCGGUCUCUUUU	22	dre-mir-128-1	UGGAGGAGGAGUGCUGGGAGACGGGGCCGUGGCACUGUAUGAGAUUCAUGUAGGCUUUCUCACAGUGAACCGGUCUCUUUUUCCAGCCCUCACUGACA	98	chr22(+):12374786-12374883
dre-miR-128-3p	UCACAGUGAACCGGUCUCUUUU	22	dre-mir-128-2	UCUGCUCAUGGGUCUGUCAGUAGUAGGACAGGGGGCCGUUUCUACUGUCAGAGAUGCUGCCACUCGUCUCACAGUGAACCGGUCUCUUUUCCUGCUAUUCACUUCUGCAAUAAUAUGAGCAGA	123	chr19(+):42915419-42915541
dre-miR-128-3p	UCACAGUGAACCGGUCUCUUUU	22	dre-mir-128-3	GAGCGGCUGAAUGCGGGGCCGUGGCGCUGUCUGAGACGCUCUACUAUUCUCACAGUGAACCGGUCUCUUUUCCAGCCGCUC	81	KN150366.1(-):5626-5706
dre-miR-129-1-3p	GAAGCCCUUACCCCAAAAAGU	21	dre-mir-129-1	GUCCUUUUCAGGUCUUUUUGCGGUCUGGGCUUGCUGUUCCUUGAACCAGUAGCCAGGAAGCCCUUACCCCAAAAAGUAUCUGCAGAGGAC	90	chr4(-):19047466-19047555
dre-miR-129-3-3p	AAGCCCUUACCCCAAAAAGUAU	22	dre-mir-129-3	GUCCUUCACGGCUCUUUUUGCGGUCUGGGCUUGCUGUUCCUUAAAUCACCAGUCAGGAAGCCCUUACCCCAAAAAGUAUCUGUGUGGGAU	90	chr18(+):10670657-10670746
dre-miR-129-3p	AAGCCCUUACCCCAAAAAGCAU	22	dre-mir-129-2	GUCUUUCACGAAUCUUUUUGCGGUCUGGGCUUGCUGUUCUCAACUAUCAAUGGGAAGCCCUUACCCCAAAAAGCAUUUGCGGAGGGC	87	chr7(-):50287933-50288019
dre-miR-129-3p	AAGCCCUUACCCCAAAAAGCAU	22	dre-mir-129-4	GUCUUUCGCGAAUCUUUUUGCGGUCUGGGCUUGCUGUUCAUAAGUAUCUAGCUGGGAAGCCCUUACCCCAAAAAGCAUUUGCGGAAGGC	89	chr25(+):30176471-30176559
dre-miR-129-5p	CUUUUUGCGGUCUGGGCUUGCU	22	dre-mir-129-2	GUCUUUCACGAAUCUUUUUGCGGUCUGGGCUUGCUGUUCUCAACUAUCAAUGGGAAGCCCUUACCCCAAAAAGCAUUUGCGGAGGGC	87	chr7(-):50287933-50288019
dre-miR-129-5p	CUUUUUGCGGUCUGGGCUUGCU	22	dre-mir-129-1	GUCCUUUUCAGGUCUUUUUGCGGUCUGGGCUUGCUGUUCCUUGAACCAGUAGCCAGGAAGCCCUUACCCCAAAAAGUAUCUGCAGAGGAC	90	chr4(-):19047466-19047555
dre-miR-129-5p	CUUUUUGCGGUCUGGGCUUGCU	22	dre-mir-129-4	GUCUUUCGCGAAUCUUUUUGCGGUCUGGGCUUGCUGUUCAUAAGUAUCUAGCUGGGAAGCCCUUACCCCAAAAAGCAUUUGCGGAAGGC	89	chr25(+):30176471-30176559
dre-miR-129-5p	CUUUUUGCGGUCUGGGCUUGCU	22	dre-mir-129-3	GUCCUUCACGGCUCUUUUUGCGGUCUGGGCUUGCUGUUCCUUAAAUCACCAGUCAGGAAGCCCUUACCCCAAAAAGUAUCUGUGUGGGAU	90	chr18(+):10670657-10670746
dre-miR-1306	CCACCUCCCCUGCAAACGUCCA	22	dre-mir-1306	UCCACCACCUCCCCUGCAAACGUCCAGUGACGCAGAGGAAAUGGACGUUAGCUCUGGUGGUGAUGGACA	69	KZ115113.1(+):217685-217753
dre-miR-130a	CAGUGCAAUGUUAAAAGGGCAU	22	dre-mir-130a	UGUCUGUCCAGUGCCCCUUUUAUAUUGUACUACUGAUAACCCAGUUAUUAAAGCAGUGCAAUGUUAAAAGGGCAUUGGCCAGGGA	85	chr10(-):33377130-33377214
dre-miR-130b	CAGUGCAAUAAUGAAAGGGCAU	22	dre-mir-130b	CUGUUGCCUGACACUCUUUCCCUGUUGCACUACUGUGGGAGCUGCAGCAAAGCAGUGCAAUAAUGAAAGGGCAUCAGUCCACUG	84	chr5(+):13299331-13299414
dre-miR-130c-3p	CAGUGCAAUAUUAAAAGGGCAU	22	dre-mir-130c-2	UUGUUGACCAGGGCCCUUUUUCUGUUGUACUACUGUGCAGUCAGAUGAGCAGUGCAAUAUUAAAAGGGCAUUGGCUGACAA	81	chr5(+):13288828-13288908
dre-miR-130c-3p	CAGUGCAAUAUUAAAAGGGCAU	22	dre-mir-130c-1	GGGAGAGGUCUGUACGGUGAUAUUGACCAUGUUUUGUCCAUUGCCCUUUUUCUGUUGUACUACUGGCCAAUCAGAAGAGCAGUGCAAUAUUAAAAGGGCAUUGGCUGAUAGAACAGAGUCCUUCACCUCUCACCCUCUCCU	141	chr10(+):17453363-17453503
dre-miR-130c-5p	GCCCUUUUUCUGUUGUACUACU	22	dre-mir-130c-2	UUGUUGACCAGGGCCCUUUUUCUGUUGUACUACUGUGCAGUCAGAUGAGCAGUGCAAUAUUAAAAGGGCAUUGGCUGACAA	81	chr5(+):13288828-13288908
dre-miR-130c-5p	GCCCUUUUUCUGUUGUACUACU	22	dre-mir-130c-1	GGGAGAGGUCUGUACGGUGAUAUUGACCAUGUUUUGUCCAUUGCCCUUUUUCUGUUGUACUACUGGCCAAUCAGAAGAGCAGUGCAAUAUUAAAAGGGCAUUGGCUGAUAGAACAGAGUCCUUCACCUCUCACCCUCUCCU	141	chr10(+):17453363-17453503
dre-miR-132-3p	UAACAGUCUACAGCCAUGGUCG	22	dre-mir-132-1	GUCUCCAUGGCGACCGUGGCAUUAGAUUGUUACUGUAGGAACAGAAUUUUUGGUAACAGUCUACAGCCAUGGUCGCUAGUGGGCA	85	chr15(+):25897715-25897799
dre-miR-132-3p	UAACAGUCUACAGCCAUGGUCG	22	dre-mir-132-2	UCCCUUCCUCUGCUGUCUCCAUGCUGACCGUGGCUUUAGAUUGUUACUGUAGCGUUGGCACGUGGUAACAGUCUACAGCCAUGGUCGCCAAGGGGCAGGUGUUACAGCGACUACUGGGA	119	chr10(+):35645017-35645135
dre-miR-132-5p	ACCGUGGCAUUAGAUUGUUACU	22	dre-mir-132-1	GUCUCCAUGGCGACCGUGGCAUUAGAUUGUUACUGUAGGAACAGAAUUUUUGGUAACAGUCUACAGCCAUGGUCGCUAGUGGGCA	85	chr15(+):25897715-25897799
dre-miR-133a-2-5p	AGCUGGUAAAAUGGAACCAAA	21	dre-mir-133a-2	AAUGCUUUGCUAAAGCUGGUAAAAUGGAACCAAAUCAACUGUUUUAUGGAUUUGGUCCCCUUCAACCAGCUGUAGCUGUGCAUU	84	chr23(-):7172120-7172203
dre-miR-133a-3p	UUUGGUCCCCUUCAACCAGCUG	22	dre-mir-133a-2	AAUGCUUUGCUAAAGCUGGUAAAAUGGAACCAAAUCAACUGUUUUAUGGAUUUGGUCCCCUUCAACCAGCUGUAGCUGUGCAUU	84	chr23(-):7172120-7172203
dre-miR-133a-3p	UUUGGUCCCCUUCAACCAGCUG	22	dre-mir-133a-1	CAUCAAACCACAAUGCUUUGCUAAAGCUGGUAAAAUGGAACCAAAUCACCUCUUCAAUGGAUUUGGUCCCCUUCAACCAGCUGUAGCUAUGCUUUGAUG	99	chr2(-):4114118-4114216
dre-miR-133a-5p	AGCUGGUAAAAUGGAACCAAAU	22	dre-mir-133a-1	CAUCAAACCACAAUGCUUUGCUAAAGCUGGUAAAAUGGAACCAAAUCACCUCUUCAAUGGAUUUGGUCCCCUUCAACCAGCUGUAGCUAUGCUUUGAUG	99	chr2(-):4114118-4114216
dre-miR-133b-3p	UUUGGUCCCCUUCAACCAGCUA	22	dre-mir-133b	CACGCCUUGCUGUGGCUGGUCAAAUGGAACCAAGUCAGGUGUUUCUGCGAGGUUUGGUCCCCUUCAACCAGCUACUGCGUCGUG	84	chr20(-):19543379-19543462
dre-miR-135a	UAUGGCUUUUUAUUCCUAUGUGA	23	dre-mir-135a	ACAGCUGUCGUGUCUUAUGGCUUUUUAUUCCUAUGUGAAGGUGAACAAGGCUCAUGUAGGGAUACAAGCCACUAAACACGCAGUCAGAAAUCAGCUUU	98	chr25(-):31044110-31044207
dre-miR-135b-3p	AUAUAGGGAUGGAAGCCAUGCA	22	dre-mir-135b	CUCUUUGCCCCGUAUGGCUUUUUAUUCCUAUCUGAGAAUUGCUCAGGACUCAUAUAGGGAUGGAAGCCAUGCAGGGCUGGGG	82	chr8(+):26005588-26005669
dre-miR-135b-5p	UAUGGCUUUUUAUUCCUAUCUG	22	dre-mir-135b	CUCUUUGCCCCGUAUGGCUUUUUAUUCCUAUCUGAGAAUUGCUCAGGACUCAUAUAGGGAUGGAAGCCAUGCAGGGCUGGGG	82	chr8(+):26005588-26005669
dre-miR-135c	UAUGGCUUUCUAUUCCUAUGUG	22	dre-mir-135c-2	UGCAGUCUAAAGCAACUCAAAACACUACUGUGCUUUAUGGCUUUCUAUUCCUAUGUGAUUUUGAUAUGAUGUAUCAUGUAGGGUUCAAAGCCAUUAGGUACAGAGUGGCUUAUCAGCAGUGGAUGUA	127	chr23(-):18063173-18063299
dre-miR-135c	UAUGGCUUUCUAUUCCUAUGUG	22	dre-mir-135c-1	UGCUGUGUUUUAUGGCUUUCUAUUCCUAUGUGAUUUUCUUCUGCCGUGUCACAUAGGGUUCAAAGCCAUUGGGUACAGAG	80	KZ115363.1(-):400023-400102
dre-miR-137-3p	UUAUUGCUUAAGAAUACGCGUA	22	dre-mir-137-2	GUUCUGUUGUUUCCCUCUAUAAAGGACUCUCUUCGGUGACGGGUAUUCUUGGGUGGAUAAUACGGCUCUCGUUGUUAUUGCUUAAGAAUACGCGUAGUCGAGGAGAGUCAUGUCGGCGGCGAGAGAGC	128	chr24(+):30352608-30352735
dre-miR-137-3p	UUAUUGCUUAAGAAUACGCGUA	22	dre-mir-137-1	GGCUCUCUUCGGUGACGGGUAUUCUUGGGUGGAUAAUACGGCUCUCGUUGUUAUUGCUUAAGAAUACGCGUAGUUGAGGAGAGUC	85	chr2(-):20145741-20145825
dre-miR-137-5p	ACGGGUAUUCUUGGGUGGAUAAUA	24	dre-mir-137-1	GGCUCUCUUCGGUGACGGGUAUUCUUGGGUGGAUAAUACGGCUCUCGUUGUUAUUGCUUAAGAAUACGCGUAGUUGAGGAGAGUC	85	chr2(-):20145741-20145825
dre-miR-137-5p	ACGGGUAUUCUUGGGUGGAUAAUA	24	dre-mir-137-2	GUUCUGUUGUUUCCCUCUAUAAAGGACUCUCUUCGGUGACGGGUAUUCUUGGGUGGAUAAUACGGCUCUCGUUGUUAUUGCUUAAGAAUACGCGUAGUCGAGGAGAGUCAUGUCGGCGGCGAGAGAGC	128	chr24(+):30352608-30352735
dre-miR-138-2-3p	GCUUCUUCACAACACCAGGGU	21	dre-mir-138-2	GAUGGAGCAGGACAGCUGGUGUUGUGAAUCAGGCCGCCGUGGUGAAAGGGUACGGCUUCUUCACAACACCAGGGUCUCACUUCAUC	86	chr16(-):7836257-7836342
dre-miR-138-3p	GCUAUUUCACAACACCAGGGU	21	dre-mir-138-1	UGUGUGCUGCAGCUGGUGUUGUGAAUCAGGCCGAUGUCACACGUCAGCGAUAACCCGGCUAUUUCACAACACCAGGGUGGCACCACA	87	chr18(+):17580159-17580245
dre-miR-138-5p	AGCUGGUGUUGUGAAUCAGGCCG	23	dre-mir-138-1	UGUGUGCUGCAGCUGGUGUUGUGAAUCAGGCCGAUGUCACACGUCAGCGAUAACCCGGCUAUUUCACAACACCAGGGUGGCACCACA	87	chr18(+):17580159-17580245
dre-miR-138-5p	AGCUGGUGUUGUGAAUCAGGCCG	23	dre-mir-138-2	GAUGGAGCAGGACAGCUGGUGUUGUGAAUCAGGCCGCCGUGGUGAAAGGGUACGGCUUCUUCACAACACCAGGGUCUCACUUCAUC	86	chr16(-):7836257-7836342
dre-miR-1388-3p	AUCUCAGGUUCGUCAGCCCAUG	22	dre-mir-1388	UGAUGGAUGAGCAGUGCUUUCCAGGACUGUCCAACCUGAGAAUGCUUGAGUUUUGGUCAAUCUCAGGUUCGUCAGCCCAUGAAAAACUGUCUCGCUCAAAGCC	103	KZ115670.1(+):206316-206418
dre-miR-1388-5p	AGGACUGUCCAACCUGAGAAUG	22	dre-mir-1388	UGAUGGAUGAGCAGUGCUUUCCAGGACUGUCCAACCUGAGAAUGCUUGAGUUUUGGUCAAUCUCAGGUUCGUCAGCCCAUGAAAAACUGUCUCGCUCAAAGCC	103	KZ115670.1(+):206316-206418
dre-miR-139-5p	UCUACAGUGCAUGUGUCU	18	dre-mir-139	CUGUAUUCUACAGUGCAUGUGUCUCCAGUGUUUCUAUGGCGACUGGGGAGGCAGCGCUGUUGGAAUAAC	69	-
dre-miR-140-3p	UACCACAGGGUAGAACCACGGAC	23	dre-mir-140	GUGUUUGUCUCCUGUGUCCCGUCAGUGGUUUUACCCUAUGGUAGGUUACGUCAUGCUGUUCUACCACAGGGUAGAACCACGGACGGGAUGUCUGGAGGUGUCUGC	105	chr25(+):34791362-34791466
dre-miR-140-5p	CAGUGGUUUUACCCUAUGGUAG	22	dre-mir-140	GUGUUUGUCUCCUGUGUCCCGUCAGUGGUUUUACCCUAUGGUAGGUUACGUCAUGCUGUUCUACCACAGGGUAGAACCACGGACGGGAUGUCUGGAGGUGUCUGC	105	chr25(+):34791362-34791466
dre-miR-141-3p	UAACACUGUCUGGUAACGAUGC	22	dre-mir-141	GUCUCUAGGGUACAUCUUACCUGACAGUGCUUGGCUGUUCACUGAUGUUCUAACACUGUCUGGUAACGAUGCACUCUGGUGAC	83	chr6(-):40656003-40656085
dre-miR-141-5p	CAUCUUACCUGACAGUGCUUGG	22	dre-mir-141	GUCUCUAGGGUACAUCUUACCUGACAGUGCUUGGCUGUUCACUGAUGUUCUAACACUGUCUGGUAACGAUGCACUCUGGUGAC	83	chr6(-):40656003-40656085
dre-miR-142a-3p	UGUAGUGUUUCCUACUUUAUGGA	23	dre-mir-142a	CGUACAGUGCAGUCAUCCAUAAAGUAGAAAGCACUACUAAACCCCUCGCCACAGUGUAGUGUUUCCUACUUUAUGGAUGAGUGUACUGUUG	91	chr5(+):3170736-3170826
dre-miR-142a-5p	CAUAAAGUAGAAAGCACUACU	21	dre-mir-142a	CGUACAGUGCAGUCAUCCAUAAAGUAGAAAGCACUACUAAACCCCUCGCCACAGUGUAGUGUUUCCUACUUUAUGGAUGAGUGUACUGUUG	91	chr5(+):3170736-3170826
dre-miR-142b-5p	CAUAAAGUAGACAGCACUACUA	22	dre-mir-142b	ACAGUGCAGUCACUCAUAAAGUAGACAGCACUACUAAACUUCUCUACACAGUGUAGUGUUUCCUACUUUAUGGAUGAGUGUACUGU	86	chr15(-):15383898-15383983
dre-miR-143	UGAGAUGAAGCACUGUAGCUC	21	dre-mir-143	GAUCUACAGUCGUCUGGCCCGCGGUGCAGUGCUGCAUCUCUGGUCAACUGGGAGUCUGAGAUGAAGCACUGUAGCUCGGGAGGACAACACUGUCAGCUC	99	KZ115462.1(+):17707-17805
dre-miR-144-3p	UACAGUAUAGAUGAUGUACU	20	dre-mir-144	GCUCUCUAGACAGGAUAUCAUCGUAUACUGUAAGUUCAUUAUUGAGACACUACAGUAUAGAUGAUGUACUAUCCAGGGGGUCAACGAGC	89	chr5(-):42272074-42272162
dre-miR-144-5p	GGAUAUCAUCGUAUACUGUAAGU	23	dre-mir-144	GCUCUCUAGACAGGAUAUCAUCGUAUACUGUAAGUUCAUUAUUGAGACACUACAGUAUAGAUGAUGUACUAUCCAGGGGGUCAACGAGC	89	chr5(-):42272074-42272162
dre-miR-145-3p	GGAUUCCUGGAAAUACUGUUCU	22	dre-mir-145	UCAGUCUUCAUCAUUUCCUCAUCCCCGGGGUCCAGUUUUCCCAGGAAUCCCUUGGGCAAUCGAAAGGGGGAUUCCUGGAAAUACUGUUCUUGGGGUUGGGGCUGGACUACUGA	113	KZ115462.1(+):19335-19447
dre-miR-145-5p	GUCCAGUUUUCCCAGGAAUCCC	22	dre-mir-145	UCAGUCUUCAUCAUUUCCUCAUCCCCGGGGUCCAGUUUUCCCAGGAAUCCCUUGGGCAAUCGAAAGGGGGAUUCCUGGAAAUACUGUUCUUGGGGUUGGGGCUGGACUACUGA	113	KZ115462.1(+):19335-19447
dre-miR-146a	UGAGAACUGAAUUCCAUAGAUGG	23	dre-mir-146a	GAGUUUGUUUUGAGCACUUUUCCCUGAGAACUGAAUUCCAUAGAUGGUGUUCAUGAAAAGUUCAUCUAUGGGCUCAGUUCUUCUGGCAAUCUGUUUAAUGUCUGCUACAAAUUC	114	chr13(+):11822170-11822283
dre-miR-146b	UGAGAACUGAAUUCCAAGGGUG	22	dre-mir-146b	GCUCUUGGCUUUGAGAACUGAAUUCCAAGGGUGUCUGCUUUAUAUUCAGCCCACGGAGUUCAGUUCUUAAGUUUGGAUGC	80	chr21(+):41639979-41640058
dre-miR-148	UCAGUGCAUUACAGAACUUUGU	22	dre-mir-148	CUUUCCAAGUAAAGUUCUGUGAUACACUCCGACUCUGAAUGUUUGCAGUCAGUGCAUUACAGAACUUUGUUUUGGGAGU	79	chr9(-):1644683-1644761
dre-miR-150	UCUCCCAAUCCUUGUACCAGUG	22	dre-mir-150	CAUCUCCGUCUCUCCCAAUCCUUGUACCAGUGUCUGAUUUACAGAUGACGCUGGACGGGGUUUGGGGGGGGCUGAGGGA	79	KZ115072.1(+):58270-58348
dre-miR-152	UCAGUGCAUGACAGAACUUUGG	22	dre-mir-152	CUGUUCACCUGGCUCAAGUUCUGUGAUACACUCAGACUUUGAAUCAGUGGUAGUCAGUGCAUGACAGAACUUUGGCCCGG	80	KZ115068.1(+):105256-105335
dre-miR-153a-3p	UUGCAUAGUCACAAAAGUGAUC	22	dre-mir-153a	GGUUGCCAGUGUCAUUUUUGUGAUGUUGCAGCUAGUUAUAUGAGCCCAGUUGCAUAGUCACAAAAGUGAUCAUUGGAAACU	81	KZ115240.1(+):286869-286949
dre-miR-153a-5p	GUCAUUUUUGUGAUGUUGCAGCU	23	dre-mir-153a	GGUUGCCAGUGUCAUUUUUGUGAUGUUGCAGCUAGUUAUAUGAGCCCAGUUGCAUAGUCACAAAAGUGAUCAUUGGAAACU	81	KZ115240.1(+):286869-286949
dre-miR-153b-3p	UUGCAUAGUCACAAAAAUGAGC	22	dre-mir-153b	GAGCGAUGGAGCGCGGUAGCGAGGUAUUGCACAGCUGUCUGUGUCAUUUUUGUGGUUUGCAGCUAGUAGUCUGGUUCCAGUUGCAUAGUCACAAAAAUGAGCACAGACAGAUGUGACUGCAGCAACGCUGAUGAAACGCUCCAUCGCC	148	chr6(+):13980945-13981092
dre-miR-153b-5p	GUCAUUUUUGUGGUUUGCAGCU	22	dre-mir-153b	GAGCGAUGGAGCGCGGUAGCGAGGUAUUGCACAGCUGUCUGUGUCAUUUUUGUGGUUUGCAGCUAGUAGUCUGGUUCCAGUUGCAUAGUCACAAAAAUGAGCACAGACAGAUGUGACUGCAGCAACGCUGAUGAAACGCUCCAUCGCC	148	chr6(+):13980945-13981092
dre-miR-153c-3p	UUGCAUAGUCACAAAAAUGAUC	22	dre-mir-153c	GAUGGAGAUCAGUAGGUCCCUGGACGUAGCACACCUCCCAGUGUCAUUUUUGUGAUUUGCAGCUAGUAGUCUGGGUCCAGUUGCAUAGUCACAAAAAUGAUCAUUGGUAGGUGUGAGUGCAGCAGGAGUGAGGCUUACCGGAUCCUCCAUC	151	chr9(+):7612376-7612526
dre-miR-155	UUAAUGCUAAUCGUGAUAGGGG	22	dre-mir-155	UGGUGCAGGUUUAAUGCUAAUCGUGAUAGGGGUUUAGUGCUGAUGAACACCUAUGCUGUUAGCAUUAAUCUUGCGCUA	78	chr1(+):576444-576521
dre-miR-15a-5p	UAGCAGCACAGAAUGGUUUGUG	22	dre-mir-15a-1	CCUGUCGGUACUGUAGCAGCACAGAAUGGUUUGUGAGUUAUAACGGGGGUGCAGGCCGUACUGUGCUGCGGCAACAACGACAGG	84	chr1(-):46722622-46722705
dre-miR-15a-5p	UAGCAGCACAGAAUGGUUUGUG	22	dre-mir-15a-2	GCCGAGGCUCUCUAGGUGAUGGUGUAGCAGCACAGAAUGGUUUGUGGUGAUACAGAGAUGCAGGCCAUGAUGUGCUGCAGCAUCAAUUCCUGGGACCUACGC	102	KZ114910.1(-):16563-16664
dre-miR-15b-5p	UAGCAGCACAUCAUGGUUUGUA	22	dre-mir-15b	GUCUGUCGUCAUCUUUUUAUUUAGCCCUGAGUGCCCUGUAGCAGCACAUCAUGGUUUGUAAGUUAUAAGGGCAAAUUCCGAAUCAUGAUGUGCUGUCACUGGGAGCCUGGGAGUUUCUCCAUUAACAUGACAGC	134	chr7(+):26070874-26071007
dre-miR-15c	AAGCAGCGCGUCAUGGUUUUC	21	dre-mir-15c	CCUUAGACCGCUAAAGCAGCGCGUCAUGGUUUUCAACAUUAGAGAAGGUGCAAGCCAUCAUUUGCUGCUCUAGAGUUUUAAGG	83	chr15(+):1543686-1543768
dre-miR-16a	UAGCAGCACGUAAAUAUUGGUG	22	dre-mir-16a	CCUUCCUCGCUUUAGCAGCACGUAAAUAUUGGUGUGUUAUAGUCAAGGCCAACCCCAAUAUUAUGUGUGCUGCUUCAGUAAGGCAGG	87	chr15(+):1543857-1543943
dre-miR-16b	UAGCAGCACGUAAAUAUUGGAG	22	dre-mir-16b	CCUGAACUUGGCCGUGUGACAGACUGGCUGCCUGGCUGUAGCAGCACGUAAAUAUUGGAGUCAAAGCACUUGCGAAUCCUCCAGUAUUGACCGUGCUGCUGGAGUUAGGCGGGCCGUUUACCGUCUGCGGGGGCCUCGGG	140	chr1(-):46722379-46722518
dre-miR-16c-3p	UCCAAUAUUGCUCGUGCUGCUGA	23	dre-mir-16c	GAGGUUGUGUGUGUGUGCGUGUGUUGUCUUGCUUUAGCAGCAUGUAAAUAUUGGAGUUACUCCUUGGCCAAUGCCUCCAAUAUUGCUCGUGCUGCUGAAGCAAGAAGUCACCAAGCAGCACAUGCACGUCAUCCUU	136	KZ114910.1(-):16404-16539
dre-miR-16c-5p	UAGCAGCAUGUAAAUAUUGGAG	22	dre-mir-16c	GAGGUUGUGUGUGUGUGCGUGUGUUGUCUUGCUUUAGCAGCAUGUAAAUAUUGGAGUUACUCCUUGGCCAAUGCCUCCAAUAUUGCUCGUGCUGCUGAAGCAAGAAGUCACCAAGCAGCACAUGCACGUCAUCCUU	136	KZ114910.1(-):16404-16539
dre-miR-1788-5p	GGCUUGUUUUAAGUUGCCUGCG	22	dre-mir-1788	UCAACCACUGUCUUGUAUCCGAGGCUUGUUUUAAGUUGCCUGCGAUCUCUUAAUGACUCAGGCAGCUAAAGCAAGUCUGGGAGGCCAGAGACAACACGACA	101	chr9(-):11551604-11551704
dre-miR-17a-2-3p	ACUGCAGUGGAGGCACUUCAAGC	23	dre-mir-17a-2	GUCACUGUAGUGUCAAAGUGCUUACAGUGCAGGUAGUUCAAUAUAAUCUACUGCAGUGGAGGCACUUCAAGCUUUACCGUGAC	83	chr9(-):53436944-53437026
dre-miR-17a-3p	ACUGCAGUGGAGGCACUUCUAG	22	dre-mir-17a-1	GGACUUUCUUGAGUGGACUUGGUUGGUGUCAAUGUAUUGUCAAAGUGCUUACAGUGCAGGUAGUAUUAUGGAAUAUCUACUGCAGUGGAGGCACUUCUAGCAAUACACUUGACCAUUUUAACCUUCCUCCAGGCAUCC	138	chr1(-):3298112-3298249
dre-miR-17a-5p	CAAAGUGCUUACAGUGCAGGUA	22	dre-mir-17a-1	GGACUUUCUUGAGUGGACUUGGUUGGUGUCAAUGUAUUGUCAAAGUGCUUACAGUGCAGGUAGUAUUAUGGAAUAUCUACUGCAGUGGAGGCACUUCUAGCAAUACACUUGACCAUUUUAACCUUCCUCCAGGCAUCC	138	chr1(-):3298112-3298249
dre-miR-17a-5p	CAAAGUGCUUACAGUGCAGGUA	22	dre-mir-17a-2	GUCACUGUAGUGUCAAAGUGCUUACAGUGCAGGUAGUUCAAUAUAAUCUACUGCAGUGGAGGCACUUCAAGCUUUACCGUGAC	83	chr9(-):53436944-53437026
dre-miR-181a-2-3p	ACCAUCGACCGUUGACUGUACC	22	dre-mir-181a-2	UUGGUGAACAUUCAACGCUGUCGGUGAGUUUUGCGCUUCUGUAACAAACCAUCGACCGUUGACUGUACCCUGAGGGUGG	79	chr8(+):53023539-53023617
dre-miR-181a-3-3p	ACCAUCGAGUGUUGAGUGUACC	22	dre-mir-181a-3	GCGAGUCUCAGAGAACAUUCAACGCUGUCGGUGAGUUUGCAAGUGAGAAAAACCAUCGAGUGUUGAGUGUACCCUGCCUCUCGA	84	chr3(+):34197447-34197530
dre-miR-181a-3p	ACCAUCGACCGUUGAUUGUACC	22	dre-mir-181a-1	GUUUGCCUCAGUGAACAUUCAACGCUGUCGGUGAGUUUGAGCUAAAUGGAAAAAAACCAUCGACCGUUGAUUGUACCCUGCGGC	84	chr22(-):22826004-22826087
dre-miR-181a-4-3p	ACCAUCGACCGUUGGCUGUGCC	22	dre-mir-181a-4	GGUGCAUUCUGGGAACAUUCAACGCUGUCGGUGAGUUUGGAUGCAUAAUAAACCAUCGACCGUUGGCUGUGCCCUGAGAUUACC	84	chr21(-):8221805-8221888
dre-miR-181a-5-3p	ACCAUCGACCGUUGACUGUGCC	22	dre-mir-181a-5	GCUGGUCUCGCAGAACAUUCAACGCUGUCGGUGAGUUUUAGACAUUGAAAAACCAUCGACCGUUGACUGUGCCCUGAGGCCACG	84	KZ115050.1(-):36861-36944
dre-miR-181a-5p	AACAUUCAACGCUGUCGGUGAGU	23	dre-mir-181a-1	GUUUGCCUCAGUGAACAUUCAACGCUGUCGGUGAGUUUGAGCUAAAUGGAAAAAAACCAUCGACCGUUGAUUGUACCCUGCGGC	84	chr22(-):22826004-22826087
dre-miR-181a-5p	AACAUUCAACGCUGUCGGUGAGU	23	dre-mir-181a-2	UUGGUGAACAUUCAACGCUGUCGGUGAGUUUUGCGCUUCUGUAACAAACCAUCGACCGUUGACUGUACCCUGAGGGUGG	79	chr8(+):53023539-53023617
dre-miR-181a-5p	AACAUUCAACGCUGUCGGUGAGU	23	dre-mir-181a-4	GGUGCAUUCUGGGAACAUUCAACGCUGUCGGUGAGUUUGGAUGCAUAAUAAACCAUCGACCGUUGGCUGUGCCCUGAGAUUACC	84	chr21(-):8221805-8221888
dre-miR-181a-5p	AACAUUCAACGCUGUCGGUGAGU	23	dre-mir-181a-5	GCUGGUCUCGCAGAACAUUCAACGCUGUCGGUGAGUUUUAGACAUUGAAAAACCAUCGACCGUUGACUGUGCCCUGAGGCCACG	84	KZ115050.1(-):36861-36944
dre-miR-181a-5p	AACAUUCAACGCUGUCGGUGAGU	23	dre-mir-181a-3	GCGAGUCUCAGAGAACAUUCAACGCUGUCGGUGAGUUUGCAAGUGAGAAAAACCAUCGAGUGUUGAGUGUACCCUGCCUCUCGA	84	chr3(+):34197447-34197530
dre-miR-181b-3-3p	CUCACUGAACAAUGAAUGCAA	21	dre-mir-181b-3	AAAGGUCACAAUCAACAUUCAUUGCUGUCGGUGGGUUGGAUUGUAAAAGAAAGCUCACUGAACAAUGAAUGCAACUGUGUCCCAG	85	chr22(-):22825793-22825877
dre-miR-181b-3p	CUCACUGAUCAAUGAAUGCAAA	22	dre-mir-181b-2	CUAAUGACUGCAAUAAACAUUCAUUGCUGUCGGUGGGUUUCUAAUAGACACAACUCACUGAUCAAUGAAUGCAAACUGCGGUGCAA	86	chr8(+):53023679-53023764
dre-miR-181b-5p	AACAUUCAUUGCUGUCGGUGGG	22	dre-mir-181b-1	CAUGUACGCACCUUCAGUUCUUCAAAGGUCAUAAUCAACAUUCAUUGCUGUCGGUGGGUUUAGUCUUGUAACAGCUCUCUGAACAAUGAAUGUAACUGUGGCCCAGAUU	109	KZ115050.1(-):34451-34559
dre-miR-181b-5p	AACAUUCAUUGCUGUCGGUGGG	22	dre-mir-181b-2	CUAAUGACUGCAAUAAACAUUCAUUGCUGUCGGUGGGUUUCUAAUAGACACAACUCACUGAUCAAUGAAUGCAAACUGCGGUGCAA	86	chr8(+):53023679-53023764
dre-miR-181b-5p	AACAUUCAUUGCUGUCGGUGGG	22	dre-mir-181b-3	AAAGGUCACAAUCAACAUUCAUUGCUGUCGGUGGGUUGGAUUGUAAAAGAAAGCUCACUGAACAAUGAAUGCAACUGUGUCCCAG	85	chr22(-):22825793-22825877
dre-miR-181c-5p	CACAUUCAUUGCUGUCGGUGGG	22	dre-mir-181c	GGGUCCUGAUUCACAUUCAUUGCUGUCGGUGGGUUUUAUCUCUUCGACUCGCCGGACAAUGAAUGAGAACUACGGCUC	78	chr3(+):34197694-34197771
dre-miR-181d-3p	CUCACUGACCAAUGAGUGCAAA	22	dre-mir-181d	UACGGCUGCAAUAUACAUUCAUUGAUGUCGUUGGGUUUCACAUGUGAGCGACUCACUGACCAAUGAGUGCAAACUGCAGUAGGA	84	chr21(-):8221660-8221743
dre-miR-181d-5p	UACAUUCAUUGAUGUCGUUGGGUU	24	dre-mir-181d	UACGGCUGCAAUAUACAUUCAUUGAUGUCGUUGGGUUUCACAUGUGAGCGACUCACUGACCAAUGAGUGCAAACUGCAGUAGGA	84	chr21(-):8221660-8221743
dre-miR-182-3p	UGGUUCUAGACUUGCCAACUA	21	dre-mir-182	GUAUUUGGCAAUGGUAGAACUCACACUGGUGAGGUAGUCAGAUCCGGUGGUUCUAGACUUGCCAACUA	68	chr4(+):15075665-15075732
dre-miR-182-5p	UUUGGCAAUGGUAGAACUCACA	22	dre-mir-182	GUAUUUGGCAAUGGUAGAACUCACACUGGUGAGGUAGUCAGAUCCGGUGGUUCUAGACUUGCCAACUA	68	chr4(+):15075665-15075732
dre-miR-183-3p	UGAAUUACCAAAGGGCCAUAA	21	dre-mir-183	GACUCCUGUUCUGUGUAUGGCACUGGUAGAAUUCACUGUGAAAGCACACUAUCAGUGAAUUACCAAAGGGCCAUAAACAGAGCAGAGAAAGAACCACG	98	chr4(+):15074566-15074663
dre-miR-183-5p	UAUGGCACUGGUAGAAUUCACUG	23	dre-mir-183	GACUCCUGUUCUGUGUAUGGCACUGGUAGAAUUCACUGUGAAAGCACACUAUCAGUGAAUUACCAAAGGGCCAUAAACAGAGCAGAGAAAGAACCACG	98	chr4(+):15074566-15074663
dre-miR-184	UGGACGGAGAACUGAUAAGGGC	22	dre-mir-184-1	GUCGAACACGUCUCCUUAUCACUUUUCCAGCCCAGCUAUCCAUUUAGUAUUCGUUGGACGGAGAACUGAUAAGGGCAUGUGCCCGAU	87	chr18(-):26203303-26203389
dre-miR-184	UGGACGGAGAACUGAUAAGGGC	22	dre-mir-184-2	CACAUCUCCUUAUCACUUUUCCAGCCCAGCUAACGAUGGUGAAUCCGUUGGACGGAGAACUGAUAAGGGCAUGUGGCUG	79	KZ115233.1(-):158062-158140
dre-miR-187	UCGUGUCUUGUGUUGCAGCC	20	dre-mir-187	UGACCUGUGGCUGGGCCAGGGGCUGCAACACAGGACAUGGGAGCUGUCUCUCACUCCCGCUCGUGUCUUGUGUUGCAGCCAGUGGAACG	89	chr19(+):34135607-34135695
dre-miR-18a	UAAGGUGCAUCUAGUGCAGAUA	22	dre-mir-18a	GGCUUUGUGCUAAGGUGCAUCUAGUGCAGAUAGUGAAGUAGACUAGCACCUACUGCCCUAAGUGCUCCUUCUGGCACGAGGGU	83	chr1(-):3298006-3298088
dre-miR-18b-5p	UAAGGUGCAUUUAGUGCAGAUA	22	dre-mir-18b	UACUGCUUAUGCUAAGGUGCAUUUAGUGCAGAUAGUGAAAUAGACUAGCACCUACUGCCCUAAGUGCCCCUUCUGGCAUAAGGGGCU	87	chr9(-):53436831-53436917
dre-miR-18c	UAAGGUGCAUCUUGUGUAGUUA	22	dre-mir-18c	GCCUUCCUGCUAAGGUGCAUCUUGUGUAGUUAGUGAAGUAGUCUAGUAUCUACUGCGCUAGAUGUUCCUUUUGGCAGGAGUAGCU	85	KZ115452.1(-):23480-23564
dre-miR-190a	UGAUAUGUUUGAUAUAUUAGGU	22	dre-mir-190a	UCUGGAGGUGAGGUAGACCUGGAAGCCUUUCUGCAGGCCUCUGUUUGAUAUGUUUGAUAUAUUAGGUUGUUAUUCUGUCCAACUAUAUAUCAAACAUAUUCCUACAGUGUCCUGCUCUGUCUCCAG	126	chr25(+):33139075-33139200
dre-miR-190b	UGAUAUGUUUGAUAUUCGGUUG	22	dre-mir-190b	UGUUACAGACUAUGUGAUAUGUUUGAUAUUCGGUUGCUUUCUUUAUAUCAUGUCAACUAAAUAUCAGACAUAUUCCUAUAGACUGUGACA	90	chr16(-):17705898-17705987
dre-miR-192	AUGACCUAUGAAUUGACAGCC	21	dre-mir-192	CUAGGACACAGGGUGAUGACCUAUGAAUUGACAGCCAGUGUUUGCAGUCCAGCUGCCUGUCAGUUCUGUAGGCCACUGCCCUGUU	85	KZ115324.1(+):286483-286567
dre-miR-193a-3p	AACUGGCCUACAAAGUCCCAGU	22	dre-mir-193a-2	GAGAGUGUGUCAGAGGCUGGGUCUUUGCGGGCAAGGUGAGUUUUCCUUUCAUUCAACUGGCCUACAAAGUCCCAGUUUUCGGCCCAUGUGACCAUCUC	98	chr6(-):18517970-18518067
dre-miR-193a-3p	AACUGGCCUACAAAGUCCCAGU	22	dre-mir-193a-1	GACAUUAAUGUGUUAGAGGUUGGGUCUUUGCGGGCAAGGUGAGUAGUUAAAUUUACUCUCAACUGGCCUACAAAGUCCCAGUUUCUGGCUCAUGUUAUC	99	chr3(+):35959912-35960010
dre-miR-193a-5p	UGGGUCUUUGCGGGCAAGGUGA	22	dre-mir-193a-2	GAGAGUGUGUCAGAGGCUGGGUCUUUGCGGGCAAGGUGAGUUUUCCUUUCAUUCAACUGGCCUACAAAGUCCCAGUUUUCGGCCCAUGUGACCAUCUC	98	chr6(-):18517970-18518067
dre-miR-193a-5p	UGGGUCUUUGCGGGCAAGGUGA	22	dre-mir-193a-1	GACAUUAAUGUGUUAGAGGUUGGGUCUUUGCGGGCAAGGUGAGUAGUUAAAUUUACUCUCAACUGGCCUACAAAGUCCCAGUUUCUGGCUCAUGUUAUC	99	chr3(+):35959912-35960010
dre-miR-193b-3p	AACUGGCCCGCAAAGUCCCGCU	22	dre-mir-193b	GUGAUUUCAGUGACGGGACUUUGGGGGCGAGAUGAGUAUUGAUCUCUAUCCAACUGGCCCGCAAAGUCCCGCUUCUGGGACUCAC	85	chr3(+):43714699-43714783
dre-miR-194a	UGUAACAGCAACUCCAUGUGG	21	dre-mir-194a	UGGUGCUGACUGCUUGUAACAGCAACUCCAUGUGGAAGGUUUGUGUCUUCCAGUGGAGCUGCUGUUGCGUGCAGAUAGUCACCA	84	KZ115324.1(+):286303-286386
dre-miR-194b	UGUAACAGCCGCUCCAUGUGGA	22	dre-mir-194b	GCUCGCUGGGUGUAACAGCCGCUCCAUGUGGAAAAUGCAUUCAAGUGCCCGUGGAUAAGCUGUUACCUGCAGAGAGU	77	chr14(-):45468955-45469031
dre-miR-196a-5p	UAGGUAGUUUCAUGUUGUUGGG	22	dre-mir-196a-1	CGCGCGGCUGGUGCGUGGUUUAGGUAGUUUCAUGUUGUUGGGAUUGGCUUCCUGGCUCGACAACAAGAAACUGCCUUGAUUACGUCAGUUCGUCUUCAUCAAGGGC	106	chr23(+):36088091-36088196
dre-miR-196a-5p	UAGGUAGUUUCAUGUUGUUGGG	22	dre-mir-196a-2	UCGAGUGGUUUAGGUAGUUUCAUGUUGUUGGGAUUACAUUCAAACUCUGCAACGUGAAACUGUCUUAAUUGCCCCA	76	chr19(+):19747619-19747694
dre-miR-196b	UAGGUAGUUUCAAGUUGUUGGG	22	dre-mir-196b	GUCUGUGAUUUAGGUAGUUUCAAGUUGUUGGGCUGGACGUUUAAUUUCACAGGAACCUGAAACUGCCUGAAUUGCUCCA	79	chr3(+):23673377-23673455
dre-miR-196d	UAGGUAGUUUUAUGUUGUUGGG	22	dre-mir-196d	AGUGAUUUAGGUAGUUUUAUGUUGUUGGGCUCUAUUUUAUAUCCCCGCAACACGAAACUGUCUUAAUUGCCU	72	chr16(+):20913413-20913484
dre-miR-199-3-3p	ACAGUAGUCCGCACAUUGGUU	21	dre-mir-199-3	CCUCCCCCUCGCCUGCCCAGUGUUCAGACUACCUGUUCAUCAUGCUGCAGCUGAACAGUAGUCCGCACAUUGGUUAGGCUGGGCUGGGACACACACAC	98	chr3(-):47195137-47195234
dre-miR-199-3p	UACAGUAGUCUGCACAUUGGUU	22	dre-mir-199-2	GGAGUUUUUGUGGACGCCCGUCCCGCCUGCCCAGUGUUCAGACUACCUGUUCAGGAAUUAGUGUUUGUACAGUAGUCUGCACAUUGGUUAGGCUGG	96	chr5(-):1376773-1376868
dre-miR-199-3p	UACAGUAGUCUGCACAUUGGUU	22	dre-mir-199-1	UCCUGCUCCGUCAUCCCAGUGUUCAGACUACCUGUUCAGGAUCAUACUGGUGUACAGUAGUCUGCACAUUGGUUAGACUGUGCAUGG	87	chr20(+):14875460-14875546
dre-miR-199-5p	CCCAGUGUUCAGACUACCUGUUC	23	dre-mir-199-2	GGAGUUUUUGUGGACGCCCGUCCCGCCUGCCCAGUGUUCAGACUACCUGUUCAGGAAUUAGUGUUUGUACAGUAGUCUGCACAUUGGUUAGGCUGG	96	chr5(-):1376773-1376868
dre-miR-199-5p	CCCAGUGUUCAGACUACCUGUUC	23	dre-mir-199-3	CCUCCCCCUCGCCUGCCCAGUGUUCAGACUACCUGUUCAUCAUGCUGCAGCUGAACAGUAGUCCGCACAUUGGUUAGGCUGGGCUGGGACACACACAC	98	chr3(-):47195137-47195234
dre-miR-199-5p	CCCAGUGUUCAGACUACCUGUUC	23	dre-mir-199-1	UCCUGCUCCGUCAUCCCAGUGUUCAGACUACCUGUUCAGGAUCAUACUGGUGUACAGUAGUCUGCACAUUGGUUAGACUGUGCAUGG	87	chr20(+):14875460-14875546
dre-miR-19a-3p	UGUGCAAAUCUAUGCAAAACUGA	23	dre-mir-19a	UGGUGCAGUUCUCUGCUAGUUUUGCAUAGUUGCACUACAAGAAAACGGGAGUUGUGCAAAUCUAUGCAAAACUGAUGGUGGCCUGCUGC	89	chr1(-):3297848-3297936
dre-miR-19a-5p	CUAGUUUUGCAUAGUUGCACUA	22	dre-mir-19a	UGGUGCAGUUCUCUGCUAGUUUUGCAUAGUUGCACUACAAGAAAACGGGAGUUGUGCAAAUCUAUGCAAAACUGAUGGUGGCCUGCUGC	89	chr1(-):3297848-3297936
dre-miR-19b-3p	UGUGCAAAUCCAUGCAAAACUGA	23	dre-mir-19b	GCUGGACCCCCGGUCAGUUUUGCUGGUUUGCAUUCAGCUUUUAAGACUGUGCGCUGUGCAAAUCCAUGCAAAACUGAUUGUGGCAGC	87	chr1(-):3297484-3297570
dre-miR-19b-5p	AGUUUUGCUGGUUUGCAUUCAG	22	dre-mir-19b	GCUGGACCCCCGGUCAGUUUUGCUGGUUUGCAUUCAGCUUUUAAGACUGUGCGCUGUGCAAAUCCAUGCAAAACUGAUUGUGGCAGC	87	chr1(-):3297484-3297570
dre-miR-19c-3p	UGUGCAAAUCCAUGCAAAACUCG	23	dre-mir-19c	UGGAAAAGCCCUGUUAUCUGGGGUGAGUUUUGCAGGAUUGCAUCCGGCUUUAUUACAACAUGCUGUGCAAAUCCAUGCAAAACUCGCUGCGCCAGGGACAAACCA	105	KZ115452.1(-):23130-23234
dre-miR-19d-3p	UGUGCAAACCCAUGCAAAACUGA	23	dre-mir-19d	GUUGUGUGACGGUCAGCUUUGCGGGGUGGGCAGUCAGCCUCCGUGUGGCCGCUGUGCAAACCCAUGCAAAACUGAGCGCUGCGCUAC	87	chr14(+):100660-100746
dre-miR-19d-5p	AGCUUUGCGGGGUGGGCAGUCAGC	24	dre-mir-19d	GUUGUGUGACGGUCAGCUUUGCGGGGUGGGCAGUCAGCCUCCGUGUGGCCGCUGUGCAAACCCAUGCAAAACUGAGCGCUGCGCUAC	87	chr14(+):100660-100746
dre-miR-200a-3p	UAACACUGUCUGGUAACGAUGU	22	dre-mir-200a	GGCACUUAGCAGCCAUCUUACCGGACAGUGCUGGACUGUAUAACUGUUUUCUAACACUGUCUGGUAACGAUGUUUGUUGGGUGACC	86	chr23(+):24072160-24072245
dre-miR-200a-5p	CAUCUUACCGGACAGUGCUGGA	22	dre-mir-200a	GGCACUUAGCAGCCAUCUUACCGGACAGUGCUGGACUGUAUAACUGUUUUCUAACACUGUCUGGUAACGAUGUUUGUUGGGUGACC	86	chr23(+):24072160-24072245
dre-miR-200b-3p	UAAUACUGCCUGGUAAUGAUGA	22	dre-mir-200b	GGUAGUCGUCUCCAUCUUACGAGGCAGCAUUGGAUUUCAUUACUUUUUCUAAUACUGCCUGGUAAUGAUGAUGAUUGCUGCC	82	chr23(+):24072029-24072110
dre-miR-200b-5p	CAUCUUACGAGGCAGCAUUGGA	22	dre-mir-200b	GGUAGUCGUCUCCAUCUUACGAGGCAGCAUUGGAUUUCAUUACUUUUUCUAAUACUGCCUGGUAAUGAUGAUGAUUGCUGCC	82	chr23(+):24072029-24072110
dre-miR-200c-3p	UAAUACUGCCUGGUAAUGAUGC	22	dre-mir-200c	UGGAUGCCUGGCUCCAUCUUACAAGGCAGUUUUGGAUGUUAUAUCUUCUCUAAUACUGCCUGGUAAUGAUGCAGAUGGUCAUCUA	85	chr6(-):40656204-40656288
dre-miR-202-3p	AGAGGCAUAGGGCAUGGGAAAA	22	dre-mir-202	CUGUUCCUUUUUCCUAUGCAUAUACCUCUUUGACAUGCUGCUUUAAAGAGGCAUAGGGCAUGGGAAAAUGGGGCGG	76	chr13(+):50602639-50602714
dre-miR-202-5p	UUCCUAUGCAUAUACCUCUUUG	22	dre-mir-202	CUGUUCCUUUUUCCUAUGCAUAUACCUCUUUGACAUGCUGCUUUAAAGAGGCAUAGGGCAUGGGAAAAUGGGGCGG	76	chr13(+):50602639-50602714
dre-miR-203a-3p	GUGAAAUGUUUAGGACCACUUG	22	dre-mir-203a	GUGUUUGGGUCUCUUCUGGUCCCUCUGGUGCAGUGGUUCUUAACAGUUCAACAGUUCUAUCUCAAAAUUGUGAAAUGUUUAGGACCACUUGACCAG	96	chr17(+):45808153-45808248
dre-miR-203a-5p	AGUGGUUCUUAACAGUUCAACAGU	24	dre-mir-203a	GUGUUUGGGUCUCUUCUGGUCCCUCUGGUGCAGUGGUUCUUAACAGUUCAACAGUUCUAUCUCAAAAUUGUGAAAUGUUUAGGACCACUUGACCAG	96	chr17(+):45808153-45808248
dre-miR-203b-3p	GUGAAAUGUUCAGGACCACUUG	22	dre-mir-203b	UCCUCUUUGGCCGAGUGGUUCUCAACAGUUCAACAGUUCUUUUGAUGAUUGUGAAAUGUUCAGGACCACUUGAUCAGACGAAGGA	85	chr20(+):27405878-27405962
dre-miR-203b-5p	AGUGGUUCUCAACAGUUCAACA	22	dre-mir-203b	UCCUCUUUGGCCGAGUGGUUCUCAACAGUUCAACAGUUCUUUUGAUGAUUGUGAAAUGUUCAGGACCACUUGAUCAGACGAAGGA	85	chr20(+):27405878-27405962
dre-miR-204-3-3p	GCAGGGACAGCAAAGGGAGGC	21	dre-mir-204-3	GUGACCUGUGGGUUUCCCUUUGUCAUCCUAUGCCUAGAGUUUGUGAUAAGGCAGGGACAGCAAAGGGAGGCUCAGCCGUCAC	82	chr25(+):34590792-34590873
dre-miR-204-5p	UUCCCUUUGUCAUCCUAUGCCU	22	dre-mir-204-1	UCAUGUGACCUGUGGACUUCCCUUUGUCAUCCUAUGCCUGGAGUAAUAGAGGGGGCUGGGAAGUCAAAGGGACGCUCAGGCGUCAUCAUUCGC	93	chr5(+):25972068-25972160
dre-miR-204-5p	UUCCCUUUGUCAUCCUAUGCCU	22	dre-mir-204-2	GUGUUGCUCUAGUGACCAGUUUGUGACCUCCUGGGUUUCCCUUUGUCAUCCUAUGCCUGCAGUUCCUGAUGAGGCUGGGACAGCAAAGGGAGGUUCAGAUGUCGACCUGUACUACAGUCAAUAC	124	KZ114891.1(-):43462-43585
dre-miR-204-5p	UUCCCUUUGUCAUCCUAUGCCU	22	dre-mir-204-3	GUGACCUGUGGGUUUCCCUUUGUCAUCCUAUGCCUAGAGUUUGUGAUAAGGCAGGGACAGCAAAGGGAGGCUCAGCCGUCAC	82	chr25(+):34590792-34590873
dre-miR-205-3p	GAUUUCAGUGGUGUGAAGUGUA	22	dre-mir-205	AAACUACUGUGCAUUCUAUCCUUCAUUCCACCGGAGUCUGUGUAGUUGUUCAAUCAGAUUUCAGUGGUGUGAAGUGUAGGAAACACGGA	89	chr23(+):33290273-33290361
dre-miR-205-5p	UCCUUCAUUCCACCGGAGUCUG	22	dre-mir-205	AAACUACUGUGCAUUCUAUCCUUCAUUCCACCGGAGUCUGUGUAGUUGUUCAAUCAGAUUUCAGUGGUGUGAAGUGUAGGAAACACGGA	89	chr23(+):33290273-33290361
dre-miR-206-3p	UGGAAUGUAAGGAAGUGUGUGG	22	dre-mir-206-1	GAAUGUUGCCUCUUGUGAAGACAUGCUUCCUUAUAUGCCCAUAUUAAUGCUCAAGUUAUGGAAUGUAAGGAAGUGUGUGGUUUCAGGGGGAAAUUUGUC	99	chr20(-):19544648-19544746
dre-miR-206-3p	UGGAAUGUAAGGAAGUGUGUGG	22	dre-mir-206-2	GAGUUGGCUGUUGCUUAUUGAGACGACAUACUUCCUUAUAUCCCCAUAUUCAGAAUUAAUCUAUGGAAUGUAAGGAAGUGUGUGGCUUCAGUGAGAUCUCAUCAUCAUC	109	chr17(-):5967238-5967346
dre-miR-20a-3p	ACUGCAGUGUGAGCACUUGAAG	22	dre-mir-20a	UCUUAAAUAAAUCUCCUAAUGUUGCAGUUGUGUUAGAGUUUCAGCAGUGCUAAAGUGCUUAUAGUGCAGGUAGUAUUUCUGUCAUCUACUGCAGUGUGAGCACUUGAAGUACUUCUAGCUUAAUGCGUCUGGGAUCCGAAGAUUUCUGCUAGA	153	chr1(-):3297603-3297755
dre-miR-20a-5p	UAAAGUGCUUAUAGUGCAGGUAG	23	dre-mir-20a	UCUUAAAUAAAUCUCCUAAUGUUGCAGUUGUGUUAGAGUUUCAGCAGUGCUAAAGUGCUUAUAGUGCAGGUAGUAUUUCUGUCAUCUACUGCAGUGUGAGCACUUGAAGUACUUCUAGCUUAAUGCGUCUGGGAUCCGAAGAUUUCUGCUAGA	153	chr1(-):3297603-3297755
dre-miR-20b-5p	CAAAGUGCUCACAGUGCAGGUAG	23	dre-mir-20b	GAGUUUGUCCUGGCAGUUCCAAAGUGCUCACAGUGCAGGUAGUGCCAGUGGAUCUACUGCAAUGUCUGCACUUCAAGUAUUGCCGGACGCCUUC	94	KZ115452.1(-):23271-23364
dre-miR-21	UAGCUUAUCAGACUGGUGUUGGC	23	dre-mir-21-2	AGACAGACAGUAAAAGUGUCCCUUUCUGUCAUGUAGCUUAUCAGACUGGUGUUGGCUUUGAGUUUUUGGCAACAGCAGUCUAAUAGGCUGUCUGACAUUUUGGGCUUAUUCGACGUACGGUUUGUUU	127	chr15(+):17373789-17373915
dre-miR-21	UAGCUUAUCAGACUGGUGUUGGC	23	dre-mir-21-1	UUAUGUGUCUUUAUUGGCGUGGAUAUAAGUCUUUCCCAGUGUGUCAGAUAGCUUAUCAGACUGGUGUUGGCUGUUACAUUCGCCCGGCGACAACAGUCUGUAGGCUGUCUGACAUUUUGGGCAUUUUCUUCUCCGAUUAAAAAUAUGA	148	KZ115325.1(-):323135-323282
dre-miR-210-3p	CUGUGCGUGUGACAGCGGCUAA	22	dre-mir-210	GCAGGUAAGCCACUGACUAACGCACAUUGCGCCUAUUCUCCACUCCACUGUGCGUGUGACAGCGGCUAACCAG	73	chr25(-):25506483-25506555
dre-miR-210-5p	AGCCACUGACUAACGCACAUUG	22	dre-mir-210	GCAGGUAAGCCACUGACUAACGCACAUUGCGCCUAUUCUCCACUCCACUGUGCGUGUGACAGCGGCUAACCAG	73	chr25(-):25506483-25506555
dre-miR-212	UAACAGUCUACAGUCAUGGCU	21	dre-mir-212	GUCAGUGCAUCAAUACCUUGGCUCUAGACUGCUUACUGCUAAAUGUGUCUGAAAGUACAGUAACAGUCUACAGUCAUGGCUACUGACGUCUGGC	94	chr15(+):25897446-25897539
dre-miR-212-3p	UAACAGUCUACAGUCAUGGCUAC	23	dre-mir-212-2	UCAGAACUUCAUGACCUUGGCUCUAGACUGCUUACUGCUUAUGGAGUCCGACAGUACAGUAACAGUCUACAGUCAUGGCUACUGAAGUCUGGC	93	chr10(+):35644706-35644798
dre-miR-212-5p	ACCUUGGCUCUAGACUGCUUACU	23	dre-mir-212-2	UCAGAACUUCAUGACCUUGGCUCUAGACUGCUUACUGCUUAUGGAGUCCGACAGUACAGUAACAGUCUACAGUCAUGGCUACUGAAGUCUGGC	93	chr10(+):35644706-35644798
dre-miR-214	ACAGCAGGCACAGACAGGCAG	21	dre-mir-214	UGACUGAGAGCGUUGUCUGUCUGCCUGUCUACACUUGCUGUGCAGAACUUCCUGCACCUGUACAGCAGGCACAGACAGGCAGACAGAUGGCAGCCCGCCU	100	chr20(+):14877639-14877738
dre-miR-216a	UAAUCUCAGCUGGCAACUGUGA	22	dre-mir-216a	GCUGAUUUUUGGCAUAAUCUCAGCUGGCAACUGUGAGUAGUGUUUUCAUCCCUCUCACAGGCGCUGCUGGGGUUCUGUCACACACAGCA	89	KZ115653.1(-):67472-67560
dre-miR-216b	UAAUCUCUGCAGGCAACUGUGA	22	dre-mir-216b	ACUGACUGGGUAAUCUCUGCAGGCAACUGUGAUGUGAUUACAGUCUCACAUUGACCUGAAGAGGUUGAGCAGUCUGU	77	chr22(-):28780257-28780333
dre-miR-217	UACUGCAUCAGGAACUGAUUGG	22	dre-mir-217	AUGAGAACUUUCUGAUGUUGGUGAUACUGCAUCAGGAACUGAUUGGAUGAUAUUCAGGAGCCAUCAGUUCCUGAUGCACUCCCAUCAGCAUCGAAAGA	98	KZ115653.1(-):67238-67335
dre-miR-2184	AACAGUAAGAGUUUAUGUGCU	21	dre-mir-2184	CUGAAUGAUGCCCUAAGCCCUAAACAGUAAGAGUUUAUGUGCUGAGGUUAAAAAUUCAGCACAUUGUCUCUUACUUGUAGGGAAAAGGGUUUCUAUCGGCCUGUCACAUU	110	chr10(-):35654245-35654354
dre-miR-2187-3p	UUACAGGCUAUGCUAAUCUAUG	22	dre-mir-2187	UCUGAAUUGAUGAUUCUGGCUUUAAUUAGUAUAGCCUGUUUUAGUGAUCACAUCAAUUCUUUACAGGCUAUGCUAAUCUAUGCCAGAAUUAGCAAUGCAUGUGG	104	KZ115517.1(-):190021-190124
dre-miR-2187-5p	UUAAUUAGUAUAGCCUGUUUUA	22	dre-mir-2187	UCUGAAUUGAUGAUUCUGGCUUUAAUUAGUAUAGCCUGUUUUAGUGAUCACAUCAAUUCUUUACAGGCUAUGCUAAUCUAUGCCAGAAUUAGCAAUGCAUGUGG	104	KZ115517.1(-):190021-190124
dre-miR-2188-3p	CUGUGUGAGGUUAGACCUAUC	21	dre-mir-2188	GGACAAUAUCAGCAAUGUGAGAAAGGUCCAACCUCACAUGUCCUGUGAGGCUGAAGGAAGGCUGUGUGAGGUUAGACCUAUCCCACACGGCCCGUAUUCUUCCC	104	chr5(-):69021859-69021962
dre-miR-2188-5p	AAGGUCCAACCUCACAUGUCC	21	dre-mir-2188	GGACAAUAUCAGCAAUGUGAGAAAGGUCCAACCUCACAUGUCCUGUGAGGCUGAAGGAAGGCUGUGUGAGGUUAGACCUAUCCCACACGGCCCGUAUUCUUCCC	104	chr5(-):69021859-69021962
dre-miR-218a	UUGUGCUUGAUCUAACCAUGUG	22	dre-mir-218a-2	GCGGGGUUUUCCUUUGUGCUUGAUCUAACCAUGUGGUUGCAGACUCAGACUAAUACAUGGUUCUGUCAAGCACCAUGGAAGGUCUUGC	88	chr1(+):23866878-23866965
dre-miR-218a	UUGUGCUUGAUCUAACCAUGUG	22	dre-mir-218a-1	CAGCUGUCUCUUGUGCUUGAUCUAACCAUGUGCCGCCGCCUACACAAGCCUCACAUGGUUCCGUCAAGCACCAGGGACCGCUG	83	KZ115446.1(-):511117-511199
dre-miR-218b	UUGUGCUUGAUCUAACCAUGCA	22	dre-mir-218b	CAGGACACCAUUGUGCUUGAUCUAACCAUGCAGUUCCCUUUCUGUCCAUGGUUGUGCCAAGCACUUUGGAGACUUG	76	chr10(+):17695265-17695340
dre-miR-219-3p	GGAGUUGUGGAUGGACAUCACGC	23	dre-mir-219-3	CUUCUCUUUUAAGUUCAUCUGUCUGGUUUGAUACUGACGGUCAGGUGCUGAUUGUCCAAACGCAAUUCUUGUGCUUGUGUGAAACAGGAGUUGUGGAUGGACAUCACGCUCCUGUCUGGUCCUCACAUCUACAGGAUGGGCCAAGUAAAG	150	chr19(-):18861739-18861888
dre-miR-219-5p	UGAUUGUCCAAACGCAAUUCUU	22	dre-mir-219-2	UGAUUGUCCAAACGCAAUUCUUGUGAAAUGUCGAGCGAUCAGUCGAGAAUUGUGCCUGGACAUCUGUUGCUGGAGGCUCC	80	KZ115158.1(+):20010-20089
dre-miR-219-5p	UGAUUGUCCAAACGCAAUUCUU	22	dre-mir-219-1	AGGGUCCCAGAGAUUGAUUGUCCAAACGCAAUUCUUGUAACAUAUAAUAUAAAUCCAAGAAUUGUGCCUGGACAUCUGUUGCUGGAGAUUC	91	KZ115309.1(-):57794-57884
dre-miR-219-5p	UGAUUGUCCAAACGCAAUUCUU	22	dre-mir-219-3	CUUCUCUUUUAAGUUCAUCUGUCUGGUUUGAUACUGACGGUCAGGUGCUGAUUGUCCAAACGCAAUUCUUGUGCUUGUGUGAAACAGGAGUUGUGGAUGGACAUCACGCUCCUGUCUGGUCCUCACAUCUACAGGAUGGGCCAAGUAAAG	150	chr19(-):18861739-18861888
dre-miR-221-3p	AGCUACAUUGUCUGCUGGGUUUC	23	dre-mir-221	GUCGUGAACCUGGCAUACAAUGUAGAUUUCUGUGUGGUACUAUCUACAGCUACAUUGUCUGCUGGGUUUCAGGCCAGCAGAAUAAUUCUGCUC	93	chr9(-):33920932-33921024
dre-miR-221-5p	ACCUGGCAUACAAUGUAGAUUUCUGU	26	dre-mir-221	GUCGUGAACCUGGCAUACAAUGUAGAUUUCUGUGUGGUACUAUCUACAGCUACAUUGUCUGCUGGGUUUCAGGCCAGCAGAAUAAUUCUGCUC	93	chr9(-):33920932-33921024
dre-miR-222a-3p	AGCUACAUCUGGCUACUGGGUCUC	24	dre-mir-222a	GCCGGUGGCUUGUUCGGGUGCUCAUGAGAUGCUCAGUAGUCAGUGUAGAUCCUGUGUCACAAUCAGCAGCUACAUCUGGCUACUGGGUCUCUGAUGGCAUUUUCUGCU	108	chr9(-):33921464-33921571
dre-miR-222a-5p	UGCUCAGUAGUCAGUGUAGAUCC	23	dre-mir-222a	GCCGGUGGCUUGUUCGGGUGCUCAUGAGAUGCUCAGUAGUCAGUGUAGAUCCUGUGUCACAAUCAGCAGCUACAUCUGGCUACUGGGUCUCUGAUGGCAUUUUCUGCU	108	chr9(-):33921464-33921571
dre-miR-222b	AGCUACAUCUGAAUACUGGGUCA	23	dre-mir-222b	GACGUGAUCUGCAGACUCAGUACUCGGUGUAGAGUCUGUGUGAUUCAGAAGAGCAGCUACAUCUGAAUACUGGGUCAGUGGAGACGUCACACGCUAC	97	chr21(-):44568170-44568266
dre-miR-223	UGUCAGUUUGUCAAAUACCCC	21	dre-mir-223	CUCUCCUCCUGAUCUAGACUCUUCUCUUAGAGUAUUUGACAGACUGUGGUUGACACUCGAUCUAAAGGGGUGUCAGUUUGUCAAAUACCCCAAGAGAGG	99	KZ115109.1(-):217123-217221
dre-miR-22a-3p	AAGCUGCCAGCUGAAGAACUGU	22	dre-mir-22a	GCUGACCUGCAGCAGUUCUUCACUGGCAAGCUUUAUGUCCUUGUGUACCAGCUAAAGCUGCCAGCUGAAGAACUGUUGUGGUUGGC	86	KZ114948.1(-):258114-258199
dre-miR-22a-5p	AGUUCUUCACUGGCAAGCUUUA	22	dre-mir-22a	GCUGACCUGCAGCAGUUCUUCACUGGCAAGCUUUAUGUCCUUGUGUACCAGCUAAAGCUGCCAGCUGAAGAACUGUUGUGGUUGGC	86	KZ114948.1(-):258114-258199
dre-miR-22b-3p	AAGCUGCCAGUUGAAGAGCUGU	22	dre-mir-22b	GUUACUUCACAGUCGUUCUUCACUGGCUAGCUUUAUGUGGCAGCACCUUAAAGCUGCCAGUUGAAGAGCUGUUGUGGGUAAC	82	KZ115105.1(+):46708-46789
dre-miR-22b-5p	CGUUCUUCACUGGCUAGCUUUA	22	dre-mir-22b	GUUACUUCACAGUCGUUCUUCACUGGCUAGCUUUAUGUGGCAGCACCUUAAAGCUGCCAGUUGAAGAGCUGUUGUGGGUAAC	82	KZ115105.1(+):46708-46789
dre-miR-23a-3-5p	GGAUUCCUGGCAGAGUGAUUU	21	dre-mir-23a-3	CCAGCUGGAGGGAUUCCUGGCAGAGUGAUUUGGGAUUAUAUCAUAAAAUCACAUUGCCAGGGAUUUCCAACCAGCUGU	78	chr2(+):33900435-33900512
dre-miR-23a-3p	AUCACAUUGCCAGGGAUUUCCA	22	dre-mir-23a-2	CUCUUCUGCCGGCCAGGGGAAUUCCUGGCAGAGUGAUUUUUAAACCUAAUGACUGAAUCACAUUGCCAGGGAUUUCCAAUGGCUCGUGUGACUCAGAG	98	chr3(+):13406226-13406323
dre-miR-23a-3p	AUCACAUUGCCAGGGAUUUCCA	22	dre-mir-23a-1	GCUGUGGCGGGGAGGGUUCCUGGCACCGUGAUUUGGUGGAUAAACAGAAAUGAAAAUCACAUUGCCAGGGAUUUCCACUCCUGCACGGU	89	chr22(+):5293213-5293301
dre-miR-23a-3p	AUCACAUUGCCAGGGAUUUCCA	22	dre-mir-23a-3	CCAGCUGGAGGGAUUCCUGGCAGAGUGAUUUGGGAUUAUAUCAUAAAAUCACAUUGCCAGGGAUUUCCAACCAGCUGU	78	chr2(+):33900435-33900512
dre-miR-23a-5p	GAAUUCCUGGCAGAGUGAUUU	21	dre-mir-23a-2	CUCUUCUGCCGGCCAGGGGAAUUCCUGGCAGAGUGAUUUUUAAACCUAAUGACUGAAUCACAUUGCCAGGGAUUUCCAAUGGCUCGUGUGACUCAGAG	98	chr3(+):13406226-13406323
dre-miR-23b	AUCACAUUGCCAGGGAUUACCA	22	dre-mir-23b	GUGGCUGUGUGGGUUCUUGGCAUGCUGAUUUGUGACUGUAGUAAAAAAAAAUCACAUUGCCAGGGAUUACCACACUACCAC	81	chr10(+):15954579-15954659
dre-miR-23b-3p	AUCACAUUGCCAGGGAUUACCAC	23	dre-mir-23b-2	CUGCUGGCUGUGUGGGUUCCUGGCGUGCUGAUUUGUGACUUAAGAUAAAAAUCACAUUGCCAGGGAUUACCACACAACCGCCAC	84	KZ115267.1(-):352535-352618
dre-miR-23b-5p	GGGUUCCUGGCGUGCUGAUUU	21	dre-mir-23b-2	CUGCUGGCUGUGUGGGUUCCUGGCGUGCUGAUUUGUGACUUAAGAUAAAAAUCACAUUGCCAGGGAUUACCACACAACCGCCAC	84	KZ115267.1(-):352535-352618
dre-miR-24	UGGCUCAGUUCAGCAGGAACAG	22	dre-mir-24-2	GGGCUGGUCUCCUGUGCCUGCUGUGCUGAUAAUCAGUGGACGGCUGUGACUGGCUCAGUUCAGCAGGAACAGGGGCCUGGUC	82	chr3(+):13412979-13413060
dre-miR-24	UGGCUCAGUUCAGCAGGAACAG	22	dre-mir-24-4	GAGGGCUGUUCCCACUUGUGCCUGCUAAACUGGUAUCAGUAUGUUGAUUUAGUGCUGGCUCAGUUCAGCAGGAACAGGUGUGAAGUCCUC	90	chr22(+):5307485-5307574
dre-miR-24	UGGCUCAGUUCAGCAGGAACAG	22	dre-mir-24-1	ACCUGAGCUCCGGUGCCUUCUGAGCUGAUAUCAGUUGUAGUAAAUCACUGGCUCAGUUCAGCAGGAACAGGAGUGUGGCC	80	chr10(+):15960835-15960914
dre-miR-24	UGGCUCAGUUCAGCAGGAACAG	22	dre-mir-24-3	GCUGAACGGGAGUCAUAUGAGAGAUAGAUGGAGCUGGCCUCCCGUGCCUACUGAGCUGAUUACAGUACUGUGCAAACACUGGCUCAGUUCAGCAGGAACAGGAGUCUGGUCCACAAACUCCACCAAACACUGCUGCUUCAGC	142	KZ115267.1(-):347402-347543
dre-miR-24b-3p	UGGCUCAGUUCAGCAGGAACCG	22	dre-mir-24b	GGUUCAACCUCCUGUGCCUACUGAGCUGAUAACAGUUGAUGUAUUUAGCACUGGCUCAGUUCAGCAGGAACCGGAGUUAAGCCC	84	chr2(+):33905762-33905845
dre-miR-24b-5p	GUGCCUACUGAGCUGAUAACAGU	23	dre-mir-24b	GGUUCAACCUCCUGUGCCUACUGAGCUGAUAACAGUUGAUGUAUUUAGCACUGGCUCAGUUCAGCAGGAACCGGAGUUAAGCCC	84	chr2(+):33905762-33905845
dre-miR-25-3p	CAUUGCACUUGUCUCGGUCUGA	22	dre-mir-25	GCCGGCGCUGAGAGGCGGAGACUUGGGCAGCUGCCGUCAUUCCCAGAAGGCAUUGCACUUGUCUCGGUCUGACAGUGGCGGC	82	chr14(+):100767-100848
dre-miR-25-5p	AGGCGGAGACUUGGGCAGCUGCC	23	dre-mir-25	GCCGGCGCUGAGAGGCGGAGACUUGGGCAGCUGCCGUCAUUCCCAGAAGGCAUUGCACUUGUCUCGGUCUGACAGUGGCGGC	82	chr14(+):100767-100848
dre-miR-26a-2-3p	CCUAUUCAUGAUUACUUGCACU	22	dre-mir-26a-2	GUGUGGACUUGAGUGCUGGAAGUGGUUGUUCCCUUGUUCAAGUAAUCCAGGAUAGGCUGUCUGUCCUGGAGGCCUAUUCAUGAUUACUUGCACUAGGUGGCAGCCGUUGCCCUUCAUGGAACUCAUGC	128	chr2(+):21375467-21375594
dre-miR-26a-3p	CCUAUUCGGGAUGACUUGGUUC	22	dre-mir-26a-1	UUUGGCCUGGUUCAAGUAAUCCAGGAUAGGCUUGUGAUGUCCGGAAAGCCUAUUCGGGAUGACUUGGUUCAGGAAUGA	78	chr9(+):41733533-41733610
dre-miR-26a-5p	UUCAAGUAAUCCAGGAUAGGCU	22	dre-mir-26a-1	UUUGGCCUGGUUCAAGUAAUCCAGGAUAGGCUUGUGAUGUCCGGAAAGCCUAUUCGGGAUGACUUGGUUCAGGAAUGA	78	chr9(+):41733533-41733610
dre-miR-26a-5p	UUCAAGUAAUCCAGGAUAGGCU	22	dre-mir-26a-3	CUAAGCUGAUACUGAGUCAGUGUGUGGCUGCAACCUGGUUCAAGUAAUCCAGGAUAGGCUUUGUGGACUAGGGUUGGCCUGUUCUUGGUUACUUGCACUGGGUUGCAGCUACUAAACAACUAAGAAGAUCAGAAGAG	137	chr24(-):20470954-20471090
dre-miR-26a-5p	UUCAAGUAAUCCAGGAUAGGCU	22	dre-mir-26a-2	GUGUGGACUUGAGUGCUGGAAGUGGUUGUUCCCUUGUUCAAGUAAUCCAGGAUAGGCUGUCUGUCCUGGAGGCCUAUUCAUGAUUACUUGCACUAGGUGGCAGCCGUUGCCCUUCAUGGAACUCAUGC	128	chr2(+):21375467-21375594
dre-miR-26b	UUCAAGUAAUCCAGGAUAGGUU	22	dre-mir-26b	GCAUUUGGCCUUUGCCUGGUUCAAGUAAUCCAGGAUAGGUUAGUUCCCACUAGUACGGCCUAUUCUUGGUUACUUGUUUCAGGAGGAGGCUACGAGC	97	KZ115688.1(-):295804-295900
dre-miR-27a-3p	UUCACAGUGGCUAAGUUCCGCU	22	dre-mir-27a	UCUGGAUAUGAUGUCUGCUGAAGUUUCGUGAGGUGCAGGACUUAGCUCACUCUGUGAACAGAUCUCGGAUAUCCUAUGUUCACAGUGGCUAAGUUCCGCUCCUCUGAGGCCCACACUCGAAAUCAGCCAGG	131	chr2(+):33902325-33902455
dre-miR-27b-3p	UUCACAGUGGCUAAGUUCUGCA	22	dre-mir-27b	UCUUUUCUAGCAGGUGCAGAGCUUAGCUGAUUGGUGAACAGUGAUUGAACUCUUUGUUCACAGUGGCUAAGUUCUGCAUCUGAGGAGAGGA	91	KZ115267.1(-):352345-352435
dre-miR-27b-5p	AGAGCUUAGCUGAUUGGUGAACA	23	dre-mir-27b	UCUUUUCUAGCAGGUGCAGAGCUUAGCUGAUUGGUGAACAGUGAUUGAACUCUUUGUUCACAGUGGCUAAGUUCUGCAUCUGAGGAGAGGA	91	KZ115267.1(-):352345-352435
dre-miR-27c-3p	UUCACAGUGGUUAAGUUCUGC	21	dre-mir-27c	GGUUGUGUGGUGUCAGGACUUAACCCACUUGUGAACAAUGCAUCGAACUUCAAUGUUCACAGUGGUUAAGUUCUGCCGCCCCUAGACC	88	chr3(+):13406451-13406538
dre-miR-27c-5p	CUUAACCCACUUGUGAACAAUG	22	dre-mir-27c	GGUUGUGUGGUGUCAGGACUUAACCCACUUGUGAACAAUGCAUCGAACUUCAAUGUUCACAGUGGUUAAGUUCUGCCGCCCCUAGACC	88	chr3(+):13406451-13406538
dre-miR-27d	UUCACAGUGGCUAAGUUCUUCA	22	dre-mir-27d	UUCUGAGCGGGUGCAGAGCUUGGCUGAUUGGUGAACGUGCAUGGCUUGUGUUUUUGUUCACAGUGGCUAAGUUCUUCACCCGAAAAGAA	89	chr10(+):15954727-15954815
dre-miR-27e	UUCACAGUGGCUAAGUUCAGUG	22	dre-mir-27e	GUCAUCACUCGCUCACGGCGCAGAGCUUAGCUAAUCGGUGAGCAUUGAUCCCUUAAGAAAACUGUUCACAGUGGCUAAGUUCAGUGUCUGGAGUGAACGGGAUGAC	106	chr22(+):5299951-5300056
dre-miR-29a	UAGCACCAUUUGAAAUCGGUUA	22	dre-mir-29a	UGAAGACCCUCAUCUCUCUCUCUCUCUCCCCACCAAACGAUGACUGAUUUCCUUUGGUGCUUAGAGUCCCAUCUGUCAUCUAGCACCAUUUGAAAUCGGUUAUAAUGACUGGGGAUCAAUUCUUCA	126	chr4(-):11606758-11606883
dre-miR-29b	UAGCACCAUUUGAAAUCAGUGU	22	dre-mir-29b-2	UCUUCCUCCAGAUGCUGGUUUCACAUGGUGGUUUAGAUGUGUUCUACCAAAGUCUAGCACCAUUUGAAAUCAGUGUUCUUGGGGAGGG	88	chr4(-):11608196-11608283
dre-miR-29b	UAGCACCAUUUGAAAUCAGUGU	22	dre-mir-29b-1	CUGCUCCUGGAAGCUGAAUUCAGAUGGUGCCAUAGAGUAUUUUAUGGCAUCUAGCACCAUUUGAAAUCAGUGUUCCUGGGCCG	83	chr6(+):47467910-47467992
dre-miR-29b3-3p	UAGCACCAUUUGAAAUCAGUGUU	23	dre-mir-29b3	AGCUGGUUUCAAGUGGUGUUUUAGAGUGCUGAUCAAAUGAAUCUAGCACCAUUUGAAAUCAGUGUU	66	chr23(-):32440125-32440190
dre-miR-301a	CAGUGCAAUAGUAUUGUCAAAG	22	dre-mir-301a	GCUGUUAACAGGUGCUCUGACUUCAUUGCACUACUGUAUUGGACAGCUAGCAGUGCAAUAGUAUUGUCAAAGCGUCUGAGAGCAGC	86	chr10(-):33377001-33377086
dre-miR-301b-3p	CAGUGCAAUAGUAUUGUCAUUG	22	dre-mir-301b	AAGGUCUGUUGCUUUGACGAUGUUGCACUACUGAACCAUCUAAUCAAGCAGUGCAAUAGUAUUGUCAUUGCAUUCGGCUUU	81	chr5(+):13289353-13289433
dre-miR-301b-5p	GCUUUGACGAUGUUGCACUAC	21	dre-mir-301b	AAGGUCUGUUGCUUUGACGAUGUUGCACUACUGAACCAUCUAAUCAAGCAGUGCAAUAGUAUUGUCAUUGCAUUCGGCUUU	81	chr5(+):13289353-13289433
dre-miR-301c-3p	CAGUGCAAUAGUAUUGUCAUAG	22	dre-mir-301c	UGAGGUCAGCUGCUCUGACGAUGUUGCACUACUGUACCAUCCAUUCUAGCAGUGCAAUAGUAUUGUCAUAGCAUUUAGCCUCU	83	chr10(+):17454490-17454572
dre-miR-301c-5p	GCUCUGACGAUGUUGCACUAC	21	dre-mir-301c	UGAGGUCAGCUGCUCUGACGAUGUUGCACUACUGUACCAUCCAUUCUAGCAGUGCAAUAGUAUUGUCAUAGCAUUUAGCCUCU	83	chr10(+):17454490-17454572
dre-miR-30a-3p	CUUUCAGUCUGAUGUUUGCUGC	22	dre-mir-30a	GGCUCCUUGCAGUUGUAAACAUUCCCGACUGGAAGUUGUAAUGCAGAAAAUCUCAGCUUUCAGUCUGAUGUUUGCUGCUACUGGUGGCC	89	chr19(+):4737576-4737664
dre-miR-30a-5p	UGUAAACAUUCCCGACUGGAAG	22	dre-mir-30a	GGCUCCUUGCAGUUGUAAACAUUCCCGACUGGAAGUUGUAAUGCAGAAAAUCUCAGCUUUCAGUCUGAUGUUUGCUGCUACUGGUGGCC	89	chr19(+):4737576-4737664
dre-miR-30b	UGUAAACAUCCUACACUCAGCU	22	dre-mir-30b	UUCCAGUGUAGUCGCUGUAAACAUCCUACACUCAGCUGUGAGCUGCAGACGAGGCUGGGCGGAGGGUGUUUGCUGUGACUGUCUGGAG	88	chr16(+):25341724-25341811
dre-miR-30c-5p	UGUAAACAUCCUACACUCUCAG	22	dre-mir-30c	CUUCAGGGAGUGUAAACAUCCUACACUCUCAGCUGGAGCGCAGCCGAGGCCGGGAGUGGGAUGUUUGCGCUCUCUGGCU	79	chr13(+):27804067-27804145
dre-miR-30d	UGUAAACAUCCCCGACUGGAAG	22	dre-mir-30d	GUGCUGUAUAUGGGUAUAACUGGUUGUUCAUGCCUGUAAACAUCCCCGACUGGAAGCUGUGCUACGCGGAAAACGAGCUUUCAGUUGGAUGUUUGCUGUCAUCGUCCAGUUCUGUCGCCUUGUAUUAC	128	chr16(+):25341416-25341543
dre-miR-30e-3p	CUUUCAGUCGGAUGUUUGCAGC	22	dre-mir-30e-2	UACGGGCUACUGUAAACAUCCUUGACUGGAAGCUGGUGCACAUGAUGGAGCUUUCAGUCGGAUGUUUGCAGCAGCCAACU	80	chr13(+):27795130-27795209
dre-miR-30e-5p	UGUAAACAUCCUUGACUGGAAG	22	dre-mir-30e-2	UACGGGCUACUGUAAACAUCCUUGACUGGAAGCUGGUGCACAUGAUGGAGCUUUCAGUCGGAUGUUUGCAGCAGCCAACU	80	chr13(+):27795130-27795209
dre-miR-31	UGGCAAGAUGUUGGCAUAGCUG	22	dre-mir-31	GAAGAGAUGGCAAGAUGUUGGCAUAGCUGUUAAUGUUUAUGGGCCUGCUAUGCCUCCAUAUUGCCAUUUCUG	72	chr7(-):73263751-73263822
dre-miR-338	UCCAGCAUCAGUGAUUUUGUUG	22	dre-mir-338-1	GGUUUCUCCCUGCAACAAUCUCCUGAUGCUGCCUGAGUGUUUUUCUUCCACUCCAGCAUCAGUGAUUUUGUUGCCGGAGGUCACC	85	KZ115395.1(-):91834-91918
dre-miR-338	UCCAGCAUCAGUGAUUUUGUUG	22	dre-mir-338-2	GUGUGUGUGUGUGUUUCUGGUGCCUGCUGAGAACAAUAUCCUGAUGCUGAAUGAGUGUGUUGAAGGAAACUCCAGCAUCAGUGAUUUUGUUGCCAGAGGAGCACUUUGGGCAUCCUGUGUAUAU	124	chr12(+):17727528-17727651
dre-miR-338-3p	UCCAGCAUCAGUGAUUUUGUUGC	23	dre-mir-338-3	GGUGUCUCCUGGCAACAAUAUCCUGGUGCUGCCUGAGUACAUCUCACAGACUCCAGCAUCAGUGAUUUUGUUGCCGGGGGAAAAC	85	chr3(-):51907478-51907562
dre-miR-338-5p	AACAAUAUCCUGGUGCUGCCUGAGU	25	dre-mir-338-3	GGUGUCUCCUGGCAACAAUAUCCUGGUGCUGCCUGAGUACAUCUCACAGACUCCAGCAUCAGUGAUUUUGUUGCCGGGGGAAAAC	85	chr3(-):51907478-51907562
dre-miR-34a	UGGCAGUGUCUUAGCUGGUUGU	22	dre-mir-34a	CUGCUGUGAGUGGUUCUCUGGCAGUGUCUUAGCUGGUUGUUGUGUGGAGUGAGAACGAAGCAAUCAGCAAGUAUACUGCCGCAGAAACUCGUCACCUU	98	KZ115683.1(+):215231-215328
dre-miR-34b	UAGGCAGUGUUGUUAGCUGAUUG	23	dre-mir-34b	GGGGUUGGUCUGUAGGCAGUGUUGUUAGCUGAUUGUUUCAUAUGAACUAUAAUCACUAACCAUACUGCCAACACAACAACCUACA	85	KZ115154.1(-):111710-111794
dre-miR-363-3p	AAUUGCACGGUAUCCAUCUGUA	22	dre-mir-363	UAAAUGCAAAUAUUUGUCUUGCUGUUUUCGGGUGGAUGACUCUGCAAUUUUAUUAGUGAUGGAAAAACUUCAAUAAAAAUUGCACGGUAUCCAUCUGUAAUCCGCUGGAUUCCAUUACCUGCGUUUG	127	KZ115452.1(-):22775-22901
dre-miR-365	UAAUGCCCCUAAAAAUCCUUAU	22	dre-mir-365-2	AGGCAGCAAGAAAAAUGAGGGACUUUUAGGGGCAGCUGUGUUUUAUUAACCCAGUCAUAAUGCCCCUAAAAAUCCUUAUUGCUCUUGCAAUUUUCAGC	98	chr3(+):35960989-35961086
dre-miR-365	UAAUGCCCCUAAAAAUCCUUAU	22	dre-mir-365-1	CCGCAGGGAGAAUGAGGGGCUUUUGGGGGCACUUGUGUUUCAGUUUCACCAUCAUAAUGCCCCUAAAAAUCCUUAUUGCUCUUGCACUG	89	chr3(+):43716827-43716915
dre-miR-365	UAAUGCCCCUAAAAAUCCUUAU	22	dre-mir-365-3	AAGUCAGCAAGAAAAGUGAGGGACUUUUAGGGGCAGCUGUGUUAUACUGACCCAGUCAUAAUGCCCCUAAAAAUCCUUAUUGCUCUUGCAGUGCUCAAC	99	KZ115174.1(-):49370-49468
dre-miR-375	UUUGUUCGUUCGGCUCGCGUUA	22	dre-mir-375-2	UGUACUUGUCUCACGUUGAGCCACACGCACAAUGCCUGCAGAUGAAAGGGUUUUGUUCGUUCGGCUCGCGUUACGCAGAUGCA	83	chr9(-):11571973-11572055
dre-miR-375	UUUGUUCGUUCGGCUCGCGUUA	22	dre-mir-375-1	UGCACUUGCUUUACGUUGAGCCACACGCACAAUACAUGUGGAUUCAGUUUUGUUCGUUCGGCUCGCGUUAAGCAAGUGCA	80	chr6(-):13800093-13800172
dre-miR-429a	UAAUACUGUCUGGUAAUGCCGU	22	dre-mir-429a	CUUGUUGAUGGACGUCUUACCAGACAUGGUUAGAUGUAAUAACUUGUGUCUAAUACUGUCUGGUAAUGCCGUCCAUCACAUG	82	chr23(+):24073815-24073896
dre-miR-429b	UAAUACUGCCUGGUAAUGCCAU	22	dre-mir-429b	UCUAUACUGCAGUAAAAUCCUCUGAUUUGUGUCUUACCAGGCAAGUUUAGAUGUUGAUACUGUGUCUAAUACUGCCUGGUAAUGCCAUCAAUCACUGGGAAUUUGAUCGC	110	chr6(-):40653129-40653238
dre-miR-430a-3p	UAAGUGCUAUUUGUUGGGGUAG	22	dre-mir-430a-1	GUCACUAUCGGUGCCCUCACAAAGGCACUGACUUGGAUGCUGCAUGUGGUAAGUGCUAUUUGUUGGGGUAGUUUCAAGUGAC	82	chr10(+):4493277-4493358
dre-miR-430a-3p	UAAGUGCUAUUUGUUGGGGUAG	22	dre-mir-430a-8	GUCACUAUCGGUACCCUCACAAAGGCACUGACUUGGAUGCUGUAAUUGGUAAGUGCUAUUUGUUGGGGUAGUUUCAAGUGAC	82	chr4(+):28704927-28705008
dre-miR-430a-3p	UAAGUGCUAUUUGUUGGGGUAG	22	dre-mir-430a-10	GUCACUAUCGGUACCCUCACAAAGGCACUGACUUGGAUGCUGUAAUUGGUAAGUGCUAUUUGUUGGGGUAGUUUCAAGUGAC	82	chr4(+):28708430-28708511
dre-miR-430a-3p	UAAGUGCUAUUUGUUGGGGUAG	22	dre-mir-430a-12	GUCUCUAUCGGUACCCUCACAAAAGCACUGACUUUGAUGCUGUAUUUGGUAAGUGCUAUUUGUUGGGGUAGUUUCAAGUGAC	82	chr4(+):28695576-28695657
dre-miR-430a-3p	UAAGUGCUAUUUGUUGGGGUAG	22	dre-mir-430a-14	GUCUCUAUCGGUACCCUCACAAAAGCACUGACUUUGAUGCUGUAUUUGGUAAGUGCUAUUUGUUGGGGUAGUUUCAAGUGAC	82	chr4(+):28707316-28707397
dre-miR-430a-3p	UAAGUGCUAUUUGUUGGGGUAG	22	dre-mir-430a-15	GUCUCUAUCGGUACCCUCACAAAAGCACUGACUUUGAUGCUGUAUUUGGUAAGUGCUAUUUGUUGGGGUAGUUUCAAGUGAC	82	chr4(+):28709056-28709137
dre-miR-430a-3p	UAAGUGCUAUUUGUUGGGGUAG	22	dre-mir-430a-18	GUCAGGCUUUCACAAGCCAGCCUCAAAGUUUGUUCUCAAACUUUAAGAAUCUAGUUGGUAAGUGCUAUUUGUUGGGGUAGUUUCAAGUGA	90	chr4(+):28693199-28693288
dre-miR-430a-3p	UAAGUGCUAUUUGUUGGGGUAG	22	dre-mir-430a-7	GUCACUAUCGGUACCCUCACAAAGGCACUGACUUGGAUGCUGUAAUUGGUAAGUGCUAUUUGUUGGGGUAGUUUCAAGUGAC	82	chr4(+):28703187-28703268
dre-miR-430a-3p	UAAGUGCUAUUUGUUGGGGUAG	22	dre-mir-430a-17	GUCUCUAUCGGUACCCUCACAAAAGCACUGACUUUGAUGCUGUAUUUGGUAAGUGCUAUUUGUUGGGGUAGUUUUAAGUGAC	82	chr4(+):28703813-28703894
dre-miR-430a-3p	UAAGUGCUAUUUGUUGGGGUAG	22	dre-mir-430a-11	GUCUCUAUCGGUACCCUCACAAAAGCACUGACUUUGAUGCUGUAAUUGGUAAGUGCUAUUUGUUGGGGUAGUUUCAAGUGAC	82	chr4(+):28701424-28701505
dre-miR-430a-3p	UAAGUGCUAUUUGUUGGGGUAG	22	dre-mir-430a-5	GUCACUAUCGGUACCCUCACAAAGGCACUGACUUGGAUGCUGUAAUUGGUAAGUGCUAUUUGUUGGGGUAGUUUCAAGUGAC	82	chr4(+):28699035-28699116
dre-miR-430a-3p	UAAGUGCUAUUUGUUGGGGUAG	22	dre-mir-430a-2	GUCACUAUCGGUACCCUCACAAAGGCACUGACUUGGAUGCUGUAAUUGGUAAGUGCUAUUUGUUGGGGUAGUUUCAAGUGAC	82	chr4(+):28694950-28695031
dre-miR-430a-3p	UAAGUGCUAUUUGUUGGGGUAG	22	dre-mir-430a-3	GUCACUAUCGGUACCCUCACAAAGGCACUGACUUGGAUGCUGUAAUUGGUAAGUGCUAUUUGUUGGGGUAGUUUCAAGUGAC	82	chr4(+):28696691-28696772
dre-miR-430a-3p	UAAGUGCUAUUUGUUGGGGUAG	22	dre-mir-430a-6	GUCACUAUCGGUACCCUCACAAAGGCACUGACUUGGAUGCUGUAAUUGGUAAGUGCUAUUUGUUGGGGUAGUUUCAAGUGAC	82	chr4(+):28700798-28700879
dre-miR-430a-3p	UAAGUGCUAUUUGUUGGGGUAG	22	dre-mir-430a-9	GUCACUAUCGGUACCCUCACAAAGGCACUGACUUGGAUGCUGUAAUUGGUAAGUGCUAUUUGUUGGGGUAGUUUCAAGUGAC	82	chr4(+):28706690-28706771
dre-miR-430a-3p	UAAGUGCUAUUUGUUGGGGUAG	22	dre-mir-430a-16	GUCUCUAUCGGUACCCUCACAAAAGCACUGACUUUGAUGCUGUAUUUGGUAAGUGCUAUUUGUUGGGGUAGUUUUAAGUGAC	82	chr4(+):28697921-28698002
dre-miR-430a-3p	UAAGUGCUAUUUGUUGGGGUAG	22	dre-mir-430a-4	GUCUCUAUCGGUACCCUCACAAAAGCACUGACUUUGAUGCUGUAUUUGGUAAGUGCUAUUUGUUGGGGUAGUUUCAAGUGAC	82	chr4(+):28693834-28693915
dre-miR-430a-3p	UAAGUGCUAUUUGUUGGGGUAG	22	dre-mir-430a-13	GUCUCUAUCGGUACCCUCACAAAAGCACUGACUUUGAUGCUGUAUUUGGUAAGUGCUAUUUGUUGGGGUAGUUUCAAGUGAC	82	chr4(+):28697317-28697398
dre-miR-430c-3p	UAAGUGCUUCUCUUUGGGGUAG	22	dre-mir-430c-1	AUUAAGAUCACUUCAAACAGGAGCAUUGAUUUGUCCUUUGUUCAUAAGUGCUUCUCUUUGGGGUAGUUUUAAU	73	chr4(+):28693371-28693443
dre-miR-430c-3p	UAAGUGCUUCUCUUUGGGGUAG	22	dre-mir-430c-2	AUUAAGAUCACUUCAAACAGGAGCAUUGAUUUGUCCUUUGUUCAUAAGUGCUUCUCUUUGGGGUAGUUUUAAU	73	chr4(+):28693975-28694047
dre-miR-430c-3p	UAAGUGCUUCUCUUUGGGGUAG	22	dre-mir-430c-15	AUUAAGAUCACUUCAAACAGGAGCAUUGAUUUGUCCUUUGUUCAUAAGUGCUUCUCUUUGGGGUAGUUUUAAU	73	chr4(+):28706853-28706925
dre-miR-430c-3p	UAAGUGCUUCUCUUUGGGGUAG	22	dre-mir-430c-7	AUUAAGAUCACUUCAAACAGGAGCAUUGAUUUGUCCUUUGUUCAUAAGUGCUUCUCUUUGGGGUAGUUUUAAU	73	chr4(+):28699198-28699270
dre-miR-430c-3p	UAAGUGCUUCUCUUUGGGGUAG	22	dre-mir-430c-5	AUUAAGAUCACUUCAAACAGGAGCAUUGAUUUGUCCUUUGUUCAUAAGUGCUUCUCUUUGGGGUAGUUUUAAU	73	chr4(+):28696854-28696926
dre-miR-430c-3p	UAAGUGCUUCUCUUUGGGGUAG	22	dre-mir-430c-6	AUUAAGAUCACUUCAAACAGGAGCAUUGAUUUGUCCUUUGUUCAUAAGUGCUUCUCUUUGGGGUAGUUUUAAU	73	chr4(+):28697458-28697530
dre-miR-430c-3p	UAAGUGCUUCUCUUUGGGGUAG	22	dre-mir-430c-16	AUUAAGAUCACUUCAAACAGGAGCAUUGAUUUGUCCUUUGUUCAUAAGUGCUUCUCUUUGGGGUAGUUUUAAU	73	chr4(+):28707457-28707529
dre-miR-430c-3p	UAAGUGCUUCUCUUUGGGGUAG	22	dre-mir-430c-3	AUUAAGAUCACUUCAAACAGGAGCAUUGAUUUGUCCUUUGUUCAUAAGUGCUUCUCUUUGGGGUAGUUUUAAU	73	chr4(+):28695113-28695185
dre-miR-430c-3p	UAAGUGCUUCUCUUUGGGGUAG	22	dre-mir-430c-8	AUUAAGAUCACUUCAAACAGGAGCAUUGAUUUGUCCUUUGUUCAUAAGUGCUUCUCUUUGGGGUAGUUUUAAU	73	chr4(+):28699824-28699896
dre-miR-430c-3p	UAAGUGCUUCUCUUUGGGGUAG	22	dre-mir-430c-12	AUUAAGAUCACUUCAAACAGGAGCAUUGAUUUGUCCUUUGUUCAUAAGUGCUUCUCUUUGGGGUAGUUUUAAU	73	chr4(+):28703350-28703422
dre-miR-430c-3p	UAAGUGCUUCUCUUUGGGGUAG	22	dre-mir-430c-14	AUUAAGAUCACUUCAAACAGGAGCAUUGAUUUGUCCUUUGUUCAUAAGUGCUUCUCUUUGGGGUAGUUUUAAU	73	chr4(+):28705716-28705788
dre-miR-430c-3p	UAAGUGCUUCUCUUUGGGGUAG	22	dre-mir-430c-13	AUUAAGAUCACUUCAAACAGGAGCAUUGAUUUGUCCUUUGUUCAUAAGUGCUUCUCUUUGGGGUAGUUUUAAU	73	chr4(+):28705090-28705162
dre-miR-430c-3p	UAAGUGCUUCUCUUUGGGGUAG	22	dre-mir-430c-10	AUUAAGAUCACUUCAAACAGGAGCAUUGAUUUGUCCUUUGUUCAUAAGUGCUUCUCUUUGGGGUAGUUUUAAU	73	chr4(+):28701587-28701659
dre-miR-430c-3p	UAAGUGCUUCUCUUUGGGGUAG	22	dre-mir-430c-18	AUUAAGAUCACUUCAAACAGGAGCAUUGAUUUGUCCUUUGUUCAUAAGUGCUUCUCUUUGGGGUAGUUUUAAU	73	chr4(+):28709197-28709269
dre-miR-430c-3p	UAAGUGCUUCUCUUUGGGGUAG	22	dre-mir-430c-4	AUUAAGAUCACUUCAAACAGGAGCAUUGAUUUGUCCUUUGUUCAUAAGUGCUUCUCUUUGGGGUAGUUUUAAU	73	chr4(+):28695717-28695789
dre-miR-430c-3p	UAAGUGCUUCUCUUUGGGGUAG	22	dre-mir-430c-9	AUUAAGAUCACUUCAAACAGGAGCAUUGAUUUGUCCUUUGUUCAUAAGUGCUUCUCUUUGGGGUAGUUUUAAU	73	chr4(+):28700961-28701033
dre-miR-430c-3p	UAAGUGCUUCUCUUUGGGGUAG	22	dre-mir-430c-17	AUUAAGAUCACUUCAAACAGGAGCAUUGAUUUGUCCUUUGUUCAUAAGUGCUUCUCUUUGGGGUAGUUUUAAU	73	chr4(+):28708593-28708665
dre-miR-430c-3p	UAAGUGCUUCUCUUUGGGGUAG	22	dre-mir-430c-11	AUUAAGAUCACUUCAAACAGGAGCAUUGAUUUGUCCUUUGUUCAUAAGUGCUUCUCUUUGGGGUAGUUUUAAU	73	chr4(+):28702213-28702285
dre-miR-451	AAACCGUUACCAUUACUGAGUU	22	dre-mir-451	AGAGGCGGCGAAACCGUUACCAUUACUGAGUUUAGUAAUGGUAAGGGUUCUGCUGCCUUU	60	chr5(-):42271971-42272030
dre-miR-454a	UAGUGCAAUAUUGCUAAUAGGG	22	dre-mir-454a	UUGCAGGUCGUUUAAGAAUUAAUCCUAAUUCUUGGGACCCUAUCAGUAUUGCCUCUGCUGUCCACUGUGUUCAGAGUAGUGCAAUAUUGCUAAUAGGGUUUUAGGUUUUAGGUUGUACCUUCAG	124	chr10(-):33376818-33376941
dre-miR-454b	UAGUGCAAUAUUGCUUAUAGGG	22	dre-mir-454b	GAUAAAUGCAUCUUGCAGGCGAGACCCUAUCAAUAUUGCCUCUGCUUUUCUCACUGUUUAUGGAGUAGUGCAAUAUUGCUUAUAGGGUCUUGACUUUAAGGCUAAUCUGCAAUAUC	116	chr5(+):13296307-13296422
dre-miR-455-2-5p	GUAUGUGCCCUUGGACUACAUU	22	dre-mir-455-2	AUCGUUGUUCCCUGAAGUGAGGGUAUGUGCCCUUGGACUACAUUGUGGAGGCCAGCACCAUGCAGUCCAUGGGCAUAUACACUUACUUCAUGGCCUACAUCAACA	105	chr16(+):51776536-51776640
dre-miR-455-3p	AUGCAGUCCAUGGGCAUAUACAC	23	dre-mir-455-1	UCCCUGGUGUGAGGGUAUGUGCCCUUGGACUACAUCGUGGAAGCCAGCACCAUGCAGUCCAUGGGCAUAUACACUUGCCUCAAGGCCUAGAUCUUC	96	KZ115158.1(-):169526-169621
dre-miR-455-3p	AUGCAGUCCAUGGGCAUAUACAC	23	dre-mir-455-2	AUCGUUGUUCCCUGAAGUGAGGGUAUGUGCCCUUGGACUACAUUGUGGAGGCCAGCACCAUGCAGUCCAUGGGCAUAUACACUUACUUCAUGGCCUACAUCAACA	105	chr16(+):51776536-51776640
dre-miR-455-5p	UAUGUGCCCUUGGACUACAUCG	22	dre-mir-455-1	UCCCUGGUGUGAGGGUAUGUGCCCUUGGACUACAUCGUGGAAGCCAGCACCAUGCAGUCCAUGGGCAUAUACACUUGCCUCAAGGCCUAGAUCUUC	96	KZ115158.1(-):169526-169621
dre-miR-456	CAGGCUGGUUAGAUGGUUGUCA	22	dre-mir-456	GCUGGUUGUGUGUGCAGGCAUCUUUCCAGUCUACAUGUGGAUCCAGGAGUCUGCAGGCUGGUUAGAUGGUUGUCACGUACCCAGC	85	KZ115524.1(+):208585-208669
dre-miR-457a	AAGCAGCACAUCAAUAUUGGCA	22	dre-mir-457a	UGCCUGACAGAAGCAGCACAUCAAUAUUGGCAGCUGCCCUCUCUCUGGGUUGCCAGUAUGGUUUGUGCUGCUCCCGUCAGACA	83	chr7(+):26071426-26071508
dre-miR-457b-5p	AAGCAGCACAUAAAUACUGGAG	22	dre-mir-457b	GAAUGUACUAAAGCAGCACAUAAAUACUGGAGGUGAUUGUGGUGUUAUCCAGUAUUGCUGUUCUGCUGUAGUAAGACC	78	KZ115452.1(-):78034-78111
dre-miR-458-3p	AUAGCUCUUUGAAUGGUACUGC	22	dre-mir-458	GUGCAGAUAGCAGCGCCAUUUACAGAGCUAUAAGCAUCAUAGUUGUCAUAGCUCUUUGAAUGGUACUGCCAUAUGCAC	78	chr14(-):25159129-25159206
dre-miR-458-5p	AGCGCCAUUUACAGAGCUAUAA	22	dre-mir-458	GUGCAGAUAGCAGCGCCAUUUACAGAGCUAUAAGCAUCAUAGUUGUCAUAGCUCUUUGAAUGGUACUGCCAUAUGCAC	78	chr14(-):25159129-25159206
dre-miR-459-5p	UCAGUAACAAGGAUUCAUCCUG	22	dre-mir-459	CCUCUUGCUCUCAGUAACAAGGAUUCAUCCUGUUGUGGUACUCAAAUCCAACAGGGAAUCUCUGUUACUGGGGUUAAGGUU	81	chr1(+):1575483-1575563
dre-miR-460-3p	CACAGCGCAUACAAUGUGGAUG	22	dre-mir-460	CUCCUCGGCUCCUGCAUUGUACACACUGUGCGGAAAACAUGGACAUGCACAGCGCAUACAAUGUGGAUGCUGUGGAG	77	chr2(-):2301358-2301434
dre-miR-460-5p	CCUGCAUUGUACACACUGUGCG	22	dre-mir-460	CUCCUCGGCUCCUGCAUUGUACACACUGUGCGGAAAACAUGGACAUGCACAGCGCAUACAAUGUGGAUGCUGUGGAG	77	chr2(-):2301358-2301434
dre-miR-462	UAACGGAACCCAUAAUGCAGCU	22	dre-mir-462	GUCUGGAUGGUAACGGAACCCAUAAUGCAGCUGUUUGGUUGAUUGAUUGACAGCUGUCUGUGGAUUCCGUGCCCCUCCUUUCUUGCAGGAGCUCAUUGAGAU	102	chr8(+):26082308-26082409
dre-miR-489	AGUGACAUCAUAUGUACGGCUGC	23	dre-mir-489	ACUGACUUGAGUGGUGGCCUGGUGGUCGUAUGUAUGACGUCAUUUACUUCAAAGUUUGGAGUGACAUCAUAUGUACGGCUGCUAAACUGCUACAUGGCUCAUCA	104	KZ115596.1(-):146317-146420
dre-miR-499-3p	AACAUCACUUUAAGUCUGUGCU	22	dre-mir-499	ACUGAGAGGGAGGCAGUUAAGACUUGCAGUGAUGUUUAGAGAAAUGUCACAUGAACAUCACUUUAAGUCUGUGCUGGCUCCUGUUCUGAGU	91	chr11(-):25205153-25205243
dre-miR-499-5p	UUAAGACUUGCAGUGAUGUUUA	22	dre-mir-499	ACUGAGAGGGAGGCAGUUAAGACUUGCAGUGAUGUUUAGAGAAAUGUCACAUGAACAUCACUUUAAGUCUGUGCUGGCUCCUGUUCUGAGU	91	chr11(-):25205153-25205243
dre-miR-7132-5p	GACUUGGUCUAAGCUCCUCAGU	22	dre-mir-7132	GUUUGGGUCCCUUGACUUGGUCUAAGCUCCUCAGUGUGAUGAUUAAACCUGAGGAGUUUAGAGCAAGUAAAGGGUCUUCAAC	82	chr3(+):59063759-59063840
dre-miR-7133-3p	UAGUUUGAUUCACAGCACAAGA	22	dre-mir-7133	UGGAGACCUGCUCUGGUGUUGUGUGUUAAACUGUAUUCCUAAACAACAUCUAUAGUUUGAUUCACAGCACAAGAGUUUGCUCUCU	85	chr8(+):10020259-10020343
dre-miR-7147	UGUACCAUGCUGGUAGCCAGU	21	dre-mir-7147	GAGUGCCCAGUGCUGUACCAUGCUGGUAGCCAGUAUGAAAUAGGGCUUGCUGGUAACCAGCGUUGUGCCCCACUGGUUGCUC	82	chr24(-):10948064-10948145
dre-miR-722	UUUUUUGCAGAAACGUUUCAGAUU	24	dre-mir-722	GGAACGGAGUGGAAUUUGAAACGUUUUGGCCAAAAAUGUAGCCAUGGCAAAGGGGUUUUUUGCAGAAACGUUUCAGAUUUCGCUCCGUUCU	91	chr1(-):56363884-56363974
dre-miR-723-3p	AAGACAUCAAUUAAAUCUGUGCU	23	dre-mir-723	UGCGUAGAGAUAAAGACAGUUUUAAAUGAUGUUACUUUUUUUCAAAUGGAGAAAGACAUCAAUUAAAUCUGUGCUUAUCUCUACAAGCA	89	KN149706.1(-):28026-28114
dre-miR-724	UUAAAGGGAAUUUGCGACUGUU	22	dre-mir-724	CAGCAGACUGGAUUUAAAGGGAAUUUGCGACUGUUAGUCAGAUUUGUAGAACAGCCACACCUUCCUUUUAAGAUCUUGCCUGCUG	85	chr11(+):3176686-3176770
dre-miR-727-3p	GUUGAGGCGAGUUGAAGACUUA	22	dre-mir-727	CUGUAUGUCAUUUUCAGUCUUCAAUUCCUCCCAGCCCGUACCCAUCGAAACUGUGAGUUGAGGCGAGUUGAAGACUUAAAGUGCUGUACAG	91	chr24(+):26185410-26185500
dre-miR-727-5p	UCAGUCUUCAAUUCCUCCCAGC	22	dre-mir-727	CUGUAUGUCAUUUUCAGUCUUCAAUUCCUCCCAGCCCGUACCCAUCGAAACUGUGAGUUGAGGCGAGUUGAAGACUUAAAGUGCUGUACAG	91	chr24(+):26185410-26185500
dre-miR-728	AUACUAAGUACACUACGUUUUC	22	dre-mir-728	CAUCUUCUGAGGAAAUGUAGUAGACUAUAAGUAUACAGUGAACAUGAACGUAUACUAAGUACACUACGUUUUCUCAAGAGGUG	83	chr24(+):26190552-26190634
dre-miR-730	UCCUCAUUGUGCAUGCUGUGUGU	23	dre-mir-730	GGGUUCUCCGGUCUCCUCAUUGUGCAUGCUGUGUGUCUUCAGUCUGGUCCUCACAGCGCCUGCAAUGUGGAGGCUAGGGGACUC	84	KZ115225.1(+):429492-429575
dre-miR-731	AAUGACACGUUUUCUCCCGGAUCG	24	dre-mir-731	UGAUGCUGAUCUGGAAUGACACGUUUUCUCCCGGAUCGCCAGAAAUAUGUUUCGCCACCGGGAACUUCGUGUCAGCCAAGAUUGGCAUCA	90	chr8(+):26082534-26082623
dre-miR-733	UGCGUUGGUUUAGCUCAGUGGUU	23	dre-mir-733	UGGCUUUUCCGUAGUGUCGCUGUUGCGUUGGUUUAGCUCAGUGGUUACUUCUGUGAUCCCUGAAAAAUCAACCUUUCAUGGUCACCUCGGUGCCA	95	chr14(-):2406978-2407072
dre-miR-734	GUAAAUGCUGCAGAAUCGUACCG	23	dre-mir-734	UGAUAUUGAGAGCUGAACCAUUCUGCAGCAUGGCUGCCUGUGGAUCCUCUGGGGAAAGGUAAAUGCUGCAGAAUCGUACCGUUCUUGGUAUCA	93	KZ115032.1(+):270388-270480
dre-miR-735-5p	GGCUGGUCCGAAGGCGGU	18	dre-mir-735	GGCUGGUCCGAAGGCGGUGGGUUAGUCUUCUCUCCCCUCUCCCACCGCUAAACUUGACCAGUC	63	chr24(-):38177965-38178027
dre-miR-736	GUAAGACGAACAAAAAGUUUU	21	dre-mir-736	UCUACUGACAGAGAAGCUUUUUGUUUGUGUUAUGUUUAUUUUCAAAUGUAAGACGAACAAAAAGUUUUUCUGUUAGUAGG	80	chr2(-):24261217-24261296
dre-miR-737-3p	AAUCAAAACCUAAAGAAAAUA	21	dre-mir-737	CCACAGCUGCUGUGCUGUUGUUUUUUUAGGUUUUGAUUUUUGUGAAAUGUCGAUGAGAAAAUCAAAACCUAAAGAAAAUACUGCGCAGAUAGAUGG	96	chr18(+):45962897-45962992
dre-miR-737-5p	GUUUUUUUAGGUUUUGAUUUU	21	dre-mir-737	CCACAGCUGCUGUGCUGUUGUUUUUUUAGGUUUUGAUUUUUGUGAAAUGUCGAUGAGAAAAUCAAAACCUAAAGAAAAUACUGCGCAGAUAGAUGG	96	chr18(+):45962897-45962992
dre-miR-7a	UGGAAGACUAGUGAUUUUGUUGU	23	dre-mir-7a-2	UUUUGGGCAUUAUGGAAGACUAGUGAUUUUGUUGUUGUGACGUCAUCAGUACUGACAACAAGUCACAGUCUGCCUCAGUGACCAGAAUCCACUCGUC	97	chr7(-):14450524-14450620
dre-miR-7a	UGGAAGACUAGUGAUUUUGUUGU	23	dre-mir-7a-1	UGUGGAAGACUAGUGAUUUUGUUGUUGUUUCUUCUGCUUUCUGACAACAAGUCACAGUCUACCUCAGCGAGCGGGCCCU	79	chr25(+):12472467-12472545
dre-miR-7a	UGGAAGACUAGUGAUUUUGUUGU	23	dre-mir-7a-3	UGUGUGUGUGUUCUGCCCUCUGCGGAGUGGAAGACUAGUGAUUUUGUUGUGAAAAUGAACAAAAACCAACAACAAACCGCAGUCGUCCUCUCAGCACGGGGCCCACACCUGCAGAGCACA	120	chr8(+):10205-10324
dre-miR-7b	UGGAAGACUUGUGAUUUUGUU	21	dre-mir-7b	UGAACGCUGGCUUGCUUCUGUGUGGAAGACUUGUGAUUUUGUUGUUGUUAGUUAGAUGAAGUGACAACAAAUCACGGUCUGCCCUACAGCACAGGCCCAGCAUC	104	chr5(-):55607744-55607847
dre-miR-9-3p	UAAAGCUAGAUAACCGAAAGU	21	dre-mir-9-3	UCAGGGGGUUGGUUUCUCUCUUUGGUUAUCUAGCUGUAUGAGUUAUAACACUGUCAUAAAGCUAGAUAACCGAAAGUAGAAAUAAUUCCCAAAAUCUUUGG	101	chr25(-):8551240-8551340
dre-miR-9-3p	UAAAGCUAGAUAACCGAAAGU	21	dre-mir-9-2	GCUCUCCUCUGGUGACUUUUGCACUUGGAGGCGUGUUGUUAUCUUUGGUUAUCUAGCUGUAUGAGUGUGCUGGCCGUCAUAAAGCUAGAUAACCGAAAGUAAGAGCCGCUUCUAUCAGCAACGUAUGGAGCAUUGC	136	chr10(-):43535960-43536095
dre-miR-9-3p	UAAAGCUAGAUAACCGAAAGU	21	dre-mir-9-5	GGAAGCGAGUUGUUAUCUUUGGUUAUCUAGCUGUAUGAGUAUUUUGCACUUCAUAAAGCUAGAUAACCGAAAGUAAAAACUGCCUCC	87	chr5(-):48170098-48170184
dre-miR-9-3p	UAAAGCUAGAUAACCGAAAGU	21	dre-mir-9-1	GGGGUUGGCUGUUAUCUUUGGUUAUCUAGCUGUAUGAGUGUUAUUCAUUCUUCAUAAAGCUAGAUAACCGAAAGUAACAAGAAUCCC	87	chr16(+):29216274-29216360
dre-miR-9-3p	UAAAGCUAGAUAACCGAAAGU	21	dre-mir-9-6	GGAGGUAGUUGCUAUCUUUGGUUAUCUAGCUGUAUGAGUGUUUAUCUGCCUUCAUAAAGCUAGAUAACCGAAAGUAGAAAUGUCCUCC	88	chr7(-):14379544-14379631
dre-miR-9-4-3p	UAAAGCUAGAGAACCGAAUGUA	22	dre-mir-9-4	UGGGUUAGUUUUUCUCUUUGGUUAUCUAGCUGUAUGAGUUUAUGUGAUAUCAUAAAGCUAGAGAACCGAAUGUAUAAACUAAUUCCA	87	chr22(+):18254769-18254855
dre-miR-9-5p	UCUUUGGUUAUCUAGCUGUAUGA	23	dre-mir-9-2	GCUCUCCUCUGGUGACUUUUGCACUUGGAGGCGUGUUGUUAUCUUUGGUUAUCUAGCUGUAUGAGUGUGCUGGCCGUCAUAAAGCUAGAUAACCGAAAGUAAGAGCCGCUUCUAUCAGCAACGUAUGGAGCAUUGC	136	chr10(-):43535960-43536095
dre-miR-9-5p	UCUUUGGUUAUCUAGCUGUAUGA	23	dre-mir-9-1	GGGGUUGGCUGUUAUCUUUGGUUAUCUAGCUGUAUGAGUGUUAUUCAUUCUUCAUAAAGCUAGAUAACCGAAAGUAACAAGAAUCCC	87	chr16(+):29216274-29216360
dre-miR-9-5p	UCUUUGGUUAUCUAGCUGUAUGA	23	dre-mir-9-6	GGAGGUAGUUGCUAUCUUUGGUUAUCUAGCUGUAUGAGUGUUUAUCUGCCUUCAUAAAGCUAGAUAACCGAAAGUAGAAAUGUCCUCC	88	chr7(-):14379544-14379631
dre-miR-9-5p	UCUUUGGUUAUCUAGCUGUAUGA	23	dre-mir-9-7	GGGUUAGUUUUUCUCUUUGGUUAUCUAGCUGUAUGAGUUAUGAAAUAUCAUAAAGCUAGAGAACCGAAAGUAGAAACUAUACCU	84	chr2(-):59102169-59102252
dre-miR-9-5p	UCUUUGGUUAUCUAGCUGUAUGA	23	dre-mir-9-3	UCAGGGGGUUGGUUUCUCUCUUUGGUUAUCUAGCUGUAUGAGUUAUAACACUGUCAUAAAGCUAGAUAACCGAAAGUAGAAAUAAUUCCCAAAAUCUUUGG	101	chr25(-):8551240-8551340
dre-miR-9-5p	UCUUUGGUUAUCUAGCUGUAUGA	23	dre-mir-9-4	UGGGUUAGUUUUUCUCUUUGGUUAUCUAGCUGUAUGAGUUUAUGUGAUAUCAUAAAGCUAGAGAACCGAAUGUAUAAACUAAUUCCA	87	chr22(+):18254769-18254855
dre-miR-9-5p	UCUUUGGUUAUCUAGCUGUAUGA	23	dre-mir-9-5	GGAAGCGAGUUGUUAUCUUUGGUUAUCUAGCUGUAUGAGUAUUUUGCACUUCAUAAAGCUAGAUAACCGAAAGUAAAAACUGCCUCC	87	chr5(-):48170098-48170184
dre-miR-9-7-3p	UAAAGCUAGAGAACCGAAAGUA	22	dre-mir-9-7	GGGUUAGUUUUUCUCUUUGGUUAUCUAGCUGUAUGAGUUAUGAAAUAUCAUAAAGCUAGAGAACCGAAAGUAGAAACUAUACCU	84	chr2(-):59102169-59102252
dre-miR-92a-3p	UAUUGCACUUGUCCCGGCCUGU	22	dre-mir-92a-1	UGGUCCCUUUCUGCGCAGGUUGGGAUUGGUAGCAAUGCUGUGUGUUUUGAAGGUAUUGCACUUGUCCCGGCCUGUAAAGGAUUGU	85	chr1(-):3297367-3297451
dre-miR-92a-3p	UAUUGCACUUGUCCCGGCCUGU	22	dre-mir-92a-2	ACAGCAUCCCUUUCUUUGCAGGUUGGGAUCGGCCGCAAUGCUCUGUGCUGGAAGUAUUGCACUUGUCCCGGCCUGUGAAGAGCAUGGGAAAUUGU	95	chr9(-):53436280-53436374
dre-miR-92a-5p	AGGUUGGGAUUGGUAGCAAUGCU	23	dre-mir-92a-1	UGGUCCCUUUCUGCGCAGGUUGGGAUUGGUAGCAAUGCUGUGUGUUUUGAAGGUAUUGCACUUGUCCCGGCCUGUAAAGGAUUGU	85	chr1(-):3297367-3297451
dre-miR-92b-3p	UAUUGCACUCGUCCCGGCCUCC	22	dre-mir-92b	UCCUACGGGCAGGGAGGUGUGGGAUGUUGUGCAGUGUUGUUCAAUCUCCCGCCAAUAUUGCACUCGUCCCGGCCUCCCUGAC	82	chr16(+):42898429-42898510
dre-miR-93	AAAAGUGCUGUUUGUGCAGGUA	22	dre-mir-93	GUGUGUGUUAAAAGUGCUGUUUGUGCAGGUAGUGUGUUUCCUCUACUGUAGGAGCAGCACUUCACAACACACAC	74	chr14(+):100502-100575
dre-miR-96-3p	CAAUUAUGUGUAGUGCCAAUAU	22	dre-mir-96	GCUGGGCGCUCUUCUUUGCCUGUUUUGGCACUAGCACAUUUUUGCUUUUUUAUAUAUACCUUGAGCAAUUAUGUGUAGUGCCAAUAUGGGACAAGACAGACAUGCUACUUAAAAAAAAAAUCAGC	125	chr4(+):15074715-15074839
dre-miR-96-5p	UUUGGCACUAGCACAUUUUUGCU	23	dre-mir-96	GCUGGGCGCUCUUCUUUGCCUGUUUUGGCACUAGCACAUUUUUGCUUUUUUAUAUAUACCUUGAGCAAUUAUGUGUAGUGCCAAUAUGGGACAAGACAGACAUGCUACUUAAAAAAAAAAUCAGC	125	chr4(+):15074715-15074839
dre-miR-99	AACCCGUAGAUCCGAUCUUGUG	22	dre-mir-99-1	GCCACUUGUCAUUAACCCGUAGAUCCGAUCUUGUGAUAAGUUUGAUGGCACAAGCUCGAUUCUAUGGGUCUCUGUCUCUGUGGU	84	chr15(+):29795583-29795666
dre-miR-99	AACCCGUAGAUCCGAUCUUGUG	22	dre-mir-99-2	CACUUGUCACAAACCCGUAGAUCCGAUCUUGUGGCGUAAUCGGCAACCCAAGCUCGAUUCUGUGGGUCUCUGUCACUGUG	80	chr10(-):38074312-38074391
ola-let-7a	UGAGGUAGUAGGUUGUAUAGUU	22	ola-let-7a-4	UUCCAGUGUUCCGCAGGUUGAGGUAGUAGGUUGUAUAGUUCAGAGUGACACCACAGGAGAUAACUGUACAGCCUCCUAGCUUUCCCUGAGGAAACACAA	99	14(-):15650352-15650450
ola-let-7a	UGAGGUAGUAGGUUGUAUAGUU	22	ola-let-7a-3	ACGUCCUUUGGGGUGAGGUAGUAGGUUGUAUAGUUUUAGGGUCAUUCCCAUGCUGUCAGAUGACUAUACAACUUACUGUCUUUCCUGAAGCGGCU	95	23(-):6186600-6186694
ola-let-7a	UGAGGUAGUAGGUUGUAUAGUU	22	ola-let-7a-2	CAGGGUGAGGUAGUAGGUUGUAUAGUUUGGUGGGUGGGACUCCACCCUUCAUAGGUGAUAACUAUACAGUCUAUUGCCUUCCCUG	85	7(+):13614181-13614265
ola-let-7a-3p	CUAUACAACUUACUGUCUUUC	21	ola-let-7a-1	AGACUGUCCUUUGGGGUGAGGUAGUAGGUUGUAUAGUUUUAGGGGUCAUGCCCUUCCUGUCAGAUAACUAUACAACUUACUGUCUUUCCUAAAGUGGCU	99	6(+):6146863-6146961
ola-let-7a-5p	UGAGGUAGUAGGUUGUAUAGU	21	ola-let-7a-1	AGACUGUCCUUUGGGGUGAGGUAGUAGGUUGUAUAGUUUUAGGGGUCAUGCCCUUCCUGUCAGAUAACUAUACAACUUACUGUCUUUCCUAAAGUGGCU	99	6(+):6146863-6146961
ola-let-7c	UGAGGUAGUAGGUUGUAUGGU	21	ola-let-7c	AUGUGUGCAUCCGGGUUGAGGUAGUAGGUUGUAUGGUUUAGAAUUACACCCUGGGAGUUAACUGUACAACCUUCUAGCUUUCCUUGGAGCGCACGU	96	14(-):1150941-1150961
ola-miR-100	AACCCGUAGAUCCGAACUU	19	ola-mir-100-2	AACGGGUAACGCCAGCUGCCACAAACCCGUAGAUCCGAACUUGUGGUGACUGGCUGCGCAAGCUCGUAUCUAUAGGUAUGUGUCUUCCUGGCAAAUACAGCU	102	14(-):15650826-15650927
ola-miR-100	AACCCGUAGAUCCGAACUU	19	ola-mir-100-1	UGAGGUAACCUGCUUGCAGCCCCAAACCCGUAGAUCCGAACUUGUGUCAUCUGACACCACAAGCUUGCAUCUACAGGUCUGCGUCUGUGCAGCUUCGGCG	100	13(+):19564760-19564859
ola-miR-103	AGCAGCAUUGUACAGGGCUAU	21	ola-mir-103-2	GCCGUGUUCCCUCUCUGCCUUCAGCCUCUUUAUGAUGCUGCCUUGUGGCGUCUUGAUCAAGCAGCAUUGUACAGGGCUAUGAAGGCGUGGAGGAGCUUCUC	101	22(-):25839317-25839417
ola-miR-103	AGCAGCAUUGUACAGGGCUAU	21	ola-mir-103-1	UCUCCACCCUGCUCUGCGCUUUUAGCCUCUUUACAGUGCUGCCUUGUCUUCUCGCGUUCAAGCAGCAUUGUACAGGGCUAUGACGGCGCAGAGAGCAUGACA	102	10(+):2552790-2552891
ola-miR-106a	UAAAGUGCUUACAGUGCAGGU	21	ola-mir-106a	GCUUUCAUUAGCUGCCCAGCAUGAGAUAAAGUGCUUACAGUGCAGGUAGUGAUCAGAACAGUCUACUGCAGUGUGAGCACUUCUCUCCCACGCUGGUCCAAAGCGCC	107	10(+):2001187-2001293
ola-miR-107	AGCAGCAUUGUACAGGGCUAU	21	ola-mir-107	AAAUCUCACAUCUGUGUGCUGUGAGCUUCUUUACAGUGUUGCCUUGUGGCAUGGCGAUCAAGCAGCAUUGUACAGGGCUAUCACUGCAUGCAGAACUGCAGCUGGUU	107	15(+):14626163-14626269
ola-miR-125a-3p	ACAGGUGAGGUCCUCGGGAACA	22	ola-mir-125a	CCGUAUGCCCCUCUGUCCCUGAGACCCUUAACCUGUGAAGUCAAAGCAGGUCACAGGUGAGGUCCUCGGGAACAGGGCUGCAUUCAG	87	16(-):11685123-11685209
ola-miR-125a-5p	UCCCUGAGACCCUUAACCUGUG	22	ola-mir-125a	CCGUAUGCCCCUCUGUCCCUGAGACCCUUAACCUGUGAAGUCAAAGCAGGUCACAGGUGAGGUCCUCGGGAACAGGGCUGCAUUCAG	87	16(-):11685123-11685209
ola-miR-125b	UCCCUGAGACCCUAACUUGUGA	22	ola-mir-125b-2	GUAGACUCUGUCGUACUUCACCUGCUCCCUGAGACCCUAACUUGUGAGCUCUCUUGAUAAAAAAUCACGGGUUAGGCUCUUGGGACGCGGGCGGAGGGCACAAUCGAC	108	14(-):1144184-1144291
ola-miR-125b	UCCCUGAGACCCUAACUUGUGA	22	ola-mir-125b-1	AACCUGUACCUCUCUCAUUCCCUGAGACCCUAACUUGUGACGUUUUGCUCUGAUGUGCACGGGUUGGGCUCUUGGGAGCUGCGAGGGGCACUCACACAUCU	101	14(-):15646480-15646580
ola-miR-135a	UAUGGCUUUCUAUUCCUAUGU	21	ola-mir-135a-2	UAAUAAACCACACAUGCAUCUUAUGGCUUUCUAUUCCUAUGUGAGUUCUAAACACAUCAUGUAGGGUUUAAAGCCAUCGGAUACACAGUGGACGAUCA	98	7(-):20955695-20955792
ola-miR-135a	UAUGGCUUUCUAUUCCUAUGU	21	ola-mir-135a-1	UGUGACUGAUUCACUGCUGUGUCUUAUGGCUUUCUAUUCCUAUGUGAUUUUUCUCUGGCAUGUCACAUAGGGUCUAAAGCCAUUGGGUGCAGAGUGGGAGAUCUG	105	5(-):24516531-24516635
ola-miR-135b	UAUGGCUUUUUAUUCCUAC	19	ola-mir-135b	AUUGCUGUUGUGUCUUAUGGCUUUUUAUUCCUACGUGAUGGUAGAUGGGUUCAUGUAGGAGUAGAAGCCACUAAACACGCGGUGAGUGCU	90	23(+):13494412-13494501
ola-miR-137	UUGCUUGAGAAUACGCGUAGCU	22	ola-mir-137	CACUUGCUCCCGUCUCGACCACGGGUAUUCUUGGGUUGAUAAUACAGAUGUCGAUGUUAUUGCUUGAGAAUACGCGUAGCUGAGCGGAAGCCAUUG	96	8(+):22468612-22468707
ola-miR-1388-5p	AGGACUGUCCAACCUGAGAAUG	22	ola-mir-1388	UUUUUAAGUACUGAGUGGUGCUUUCUAGGACUGUCCAACCUGAGAAUGUUGGUUUAAGGCUCAAUCUCAGGUUCGUCAGCCCAUGAAACGCCAACUCGCUUCUGCAGA	108	7(+):15988885-15988992
ola-miR-139	UCUACAGUGCAUGUGUCUCCA	21	ola-mir-139	UAUUAUGGCCUGGCUGUAUUCUACAGUGCAUGUGUCUCCAGUAUGUUAGUGAUGCUACUGGAGACUCGGCUCUGUUGGAAUAACAACCAGGACCCAACG	99	13(+):21690229-21690327
ola-miR-140-5p	CAGUGGUUUUACCCUAUGGUAG	22	ola-mir-140	UGUCUCCGGUGUCACGUCAGUGGUUUUACCCUAUGGUAGGUGACAUCAUGCUGUUCUACCACAGGGUAGAACCACGGACGGGAUGUUGGGAGGUG	95	6(+):22770458-22770552
ola-miR-144	AGGAUAUCAUCUUAUACUGUAA	22	ola-mir-144	CACGGCUCCAUCUUGAGCCCUGGACAGGAUAUCAUCUUAUACUGUAAGUUUAAUAAAGAGACACUACAGUAUAGAUGAUGUACUAUCCAGGGUUUCAUUCCACCUCUG	108	14(+):21443523-21443630
ola-miR-146a-5p	UGAGAACUGAAUUCCAUAGAUGGUA	25	ola-mir-146a	GUUUACGAGAAGUGCUCUACUAUGAGAACUGAAUUCCAUAGAUGGUAGCUUUUCUAGGUGUCAUCUAUGGGCUCAGUUCUUUUGGCAUGGUACUGGUUUGUCGAGC	106	15(-):22802269-22802374
ola-miR-150	ACUCCCAAUCCUUGUACCAGU	21	ola-mir-150	GUGUUCUCAGGAGCCGGACGCAUUUCUGCAGAUCUUCCUCCAAAGGUCUCGGUCCGGUCACUCCCAAUCCUUGUACCAGUGUCCUGCUAUGGUGGCGCUGGACAGGUUU	109	8(-):25382196-25382304
ola-miR-152	UCAGUGCAUAACAGAACUUUGUC	23	ola-mir-152	AUUGGUGCUGAGGUUCUGGUCAAAGUUCUGUGAUACACUCAGACUGUGAAUGUUUGCUGGUCAGUGCAUAACAGAACUUUGUCCCGGCUCGGAAACUUUGU	101	8(+):24625017-24625117
ola-miR-15a	UAGCAGCACGGAAUGGUUUG	20	ola-mir-15a	GCUGACCGGAGCUCUGGUGAUGCUGUAGCAGCACGGAAUGGUUUGUGGGUUAUUGUGAGAUGCAGGCCAUGCCGUGCUGCCGCAGUAAUGCCCGAUUACACAAC	104	21(+):11191711-11191814
ola-miR-16	UAGCAGCACGUAAAUAUUGGC	21	ola-mir-16	UUUCAAUAUACCUGCUACGCUGUAGCAGCACGUAAAUAUUGGCGUGUGAAAAAAGCCCCCAACCCCAAUAUUAGCAGUGCUGCUUCAGUGUGACGGGAUCAAA	103	13(+):12901172-12901274
ola-miR-181b-3p	CUCACUGAACGAUGAAUGCA	20	ola-mir-181b-1	AGCAAAGGUCACAAUCAACAUUCAUUGCUGUCGGUGGGUUUAACUAUGUGGAAGAGCUCACUGAACGAUGAAUGCAACUGUGUCCCAGAUUUCUU	95	4(+):12358479-12358573
ola-miR-181b-5p	AACAUUCAUUGCUGUCGGUGGGUU	24	ola-mir-181b-1	AGCAAAGGUCACAAUCAACAUUCAUUGCUGUCGGUGGGUUUAACUAUGUGGAAGAGCUCACUGAACGAUGAAUGCAACUGUGUCCCAGAUUUCUU	95	4(+):12358479-12358573
ola-miR-181b-5p	AACAUUCAUUGCUGUCGGUGGGUU	24	ola-mir-181b-2	UCCAGGAGUCAACCUUAAGGCUGCAAUAAACAUUCAUUGCUGUCGGUGGGUUUAUGCAGGAACAACUCACUGAUCAAUGAAUGCAAACUGCGGUUCGCACAUCCUGCUGA	110	9(+):27956674-27956783
ola-miR-183-3p	GUGAAUUACCAUAGGGCCAUA	21	ola-mir-183-1	AUCCACAAUUCCUCCUAUUCUGUGUAUGGCACUGGUAGAAUUCACUGUCACAGCACUCUAUCAGUGAAUUACCAUAGGGCCAUAAACAGAGUAGAGACAGAACCUCAGU	109	6(-):16407646-16407754
ola-miR-183-3p	GUGAAUUACCAUAGGGCCAUA	21	ola-mir-183-2	UGACUCCUGUUCUGUGUAUGGCACUGGUAGAAUUCACUGUGAGAGCUCACUAUCAGUGAAUUACCAUAGGGCCAUAAACAGAGCAGAGAAA	91	23(+):14604483-14604573
ola-miR-184-3p	UGGACGGAGAACUGAUAAGGG	21	ola-mir-184-1	UUAUAGUCACUCACAUCUCCUUAUCACUUUUCCAGCCCAGCUAUGUGGUCUGUAUUCGUUGGACGGAGAACUGAUAAGGGCAUGUGCAUGACAUUA	96	3(+):25857484-25857579
ola-miR-184-3p	UGGACGGAGAACUGAUAAGGG	21	ola-mir-184-2	AAUGUUGUCAAGCACAUCUCCUUAUCACUUUUCCAGCCCAGCUAUCUGACAAACGUUUGUUGGACGGAGAACUGAUAAGGGUAUGUGCCUGGCACUUU	98	6(+):12810246-12810343
ola-miR-187	GGCUGCAACACAGGACAU	18	ola-mir-187	UGGUUGGGCCAGCGGCUGCAACACAGGACAUGGGUCCUGCUUCUCCUCCCCGCUCGUGUCUUGUGUUGCAGCCAGUGGAGCUGCCUA	87	11(+):7840464-7840550
ola-miR-192-3p	CCUGUCAGUUCUGUAGGCCACUG	23	ola-mir-192	AAGCGUUUGGGCACAAGGUGAUGACCUAUGAAUUGACAGCCAGUUACUUCUAACACCUGCCUGUCAGUUCUGUAGGCCACUGCUGCGUUUGUCCCCCU	98	14(+):20215822-20215919
ola-miR-192-5p	UGACCUAUGAAUUGACAGCCA	21	ola-mir-192	AAGCGUUUGGGCACAAGGUGAUGACCUAUGAAUUGACAGCCAGUUACUUCUAACACCUGCCUGUCAGUUCUGUAGGCCACUGCUGCGUUUGUCCCCCU	98	14(+):20215822-20215919
ola-miR-194-3p	CCAGUGGAGGUGCUGUUACCUG	22	ola-mir-194	UCGGCCAUGGCCUUGCUGGUGUUUGCUGGAUGUAACAGCAACUCCAUGUGGAAGCUGUGUCUGUUCCAGUGGAGGUGCUGUUACCUGCAGAGACCACCGAACCCCGCUGG	110	14(+):20215672-20215781
ola-miR-194-5p	UGUAACAGCAACUCCAUGU	19	ola-mir-194	UCGGCCAUGGCCUUGCUGGUGUUUGCUGGAUGUAACAGCAACUCCAUGUGGAAGCUGUGUCUGUUCCAGUGGAGGUGCUGUUACCUGCAGAGACCACCGAACCCCGCUGG	110	14(+):20215672-20215781
ola-miR-196a	UAGGUAGUUUCAUGUUGUUGG	21	ola-mir-196a	UUGCGCGAAGCUGGAGCGUGGUUUAGGUAGUUUCAUGUUGUUGGGGUUGGCUUCCUGGCUCGGCAACAAGAAACUGCCUUGAUUACGUCAGUUCGUCUUCAUCAA	105	7(+):12869858-12869962
ola-miR-199a-3p	ACAGUAGUCUGCACAUUGGUUA	22	ola-mir-199a-3	UACCCCUCCCCCCAUCCCGCCUGCCCAGUGUUCAGACUACCUGUUCAGGAAGUAGUGGUUGUACAGUAGUCUGCACAUUGGUUAGGCUGGUUAGGGAAGUGCG	103	12(+):11677445-11677547
ola-miR-199a-3p	ACAGUAGUCUGCACAUUGGUUA	22	ola-mir-199a-2	UCUCUAUCCCCCACCCCGCCUGCCCAGUGUUCAGACUACCUGUUCCUCCAGCUAUAACUGAACAGUAGUCUGCACAUUGGUUAGGCUAGACUGGGAGCCACACA	104	8(+):9465167-9465270
ola-miR-199a-3p	ACAGUAGUCUGCACAUUGGUUA	22	ola-mir-199a-1	AGGCAUCCUGCUCCGUCAUCCCAGUGUUCAGACUACCUGUUCAGAAUCUUCCUGGUGUACAGUAGUCUGCACAUUGGUUAGACUGUGCAUGGAAGUAU	98	4(+):4302500-4302597
ola-miR-199a-3p	ACAGUAGUCUGCACAUUGGUUA	22	ola-mir-199a-4	AUUCCGGCUCCGUCCACCCAGUGUUCAGACUACCUGUUCAUUGUCAUACUGGUGUACAGUAGUCUGCACAUUGGUUAGACUGGGCCGGGCU	91	17(+):16117948-16118038
ola-miR-199a-5p	CCCAGUGUUCAGACUACCUGUU	22	ola-mir-199a-4	AUUCCGGCUCCGUCCACCCAGUGUUCAGACUACCUGUUCAUUGUCAUACUGGUGUACAGUAGUCUGCACAUUGGUUAGACUGGGCCGGGCU	91	17(+):16117948-16118038
ola-miR-199a-5p	CCCAGUGUUCAGACUACCUGUU	22	ola-mir-199a-1	AGGCAUCCUGCUCCGUCAUCCCAGUGUUCAGACUACCUGUUCAGAAUCUUCCUGGUGUACAGUAGUCUGCACAUUGGUUAGACUGUGCAUGGAAGUAU	98	4(+):4302500-4302597
ola-miR-199a-5p	CCCAGUGUUCAGACUACCUGUU	22	ola-mir-199a-3	UACCCCUCCCCCCAUCCCGCCUGCCCAGUGUUCAGACUACCUGUUCAGGAAGUAGUGGUUGUACAGUAGUCUGCACAUUGGUUAGGCUGGUUAGGGAAGUGCG	103	12(+):11677445-11677547
ola-miR-199a-5p	CCCAGUGUUCAGACUACCUGUU	22	ola-mir-199a-2	UCUCUAUCCCCCACCCCGCCUGCCCAGUGUUCAGACUACCUGUUCCUCCAGCUAUAACUGAACAGUAGUCUGCACAUUGGUUAGGCUAGACUGGGAGCCACACA	104	8(+):9465167-9465270
ola-miR-19a	UGUGCAAAUCUAUGCAAA	18	ola-mir-19a	AUGCACAGACUGUCAGUUCUCUGUUAGUUUUGCAUAGUUGCACUGCAAGAAGAGAUGCGUUGUGCAAAUCUAUGCAAAGCUGAUAGUGGCCUGUGUUUUCAUCUGAAU	108	21(-):25693520-25693627
ola-miR-19d	UGUGCAAACCCAUGCAAAACUG	22	ola-mir-19d	UUCUGGUCCUGGCCAGCUUUGCAGGGUGGGCAGUCAGCCUGUGCAUGCCUGGAGCAGCUGUGCAAACCCAUGCAAAACUGACUAUGGCCAGCA	93	10(+):2001485-2001577
ola-miR-200b	UAAUACUGCCUGGUAAUGAUG	21	ola-mir-200b	GAGCAGCUUUAGGCGACUACCUCCAUCUUACGAGGCAGCAUUGGAUAUCAUCCCUUUCUCUAAUACUGCCUGGUAAUGAUGAUGGUCGUCACCUGCCC	98	7(-):217985-218082
ola-miR-20a	UAAAGUGCUUAUAGUGCAGGU	21	ola-mir-20a-1	UCCAGUGAUCCCAGUUUCAGCAGUACUAAAGUGCUUAUAGUGCAGGUAGUGUUUCUACCUUAUCUACUGCAAUGUAAGCACUUGAAGUACUUCUAACUGUAUUUUUCUG	109	3(+):15107783-15107891
ola-miR-20a	UAAAGUGCUUAUAGUGCAGGU	21	ola-mir-20a-2	AAUCCACUCAGGUUUCAGUAGUAUUAAAGUGCUUAUAGUGCAGGUAGUUCUGUGGAUUUCUACUGCAGUGUGAGCACUUGAAGUACUUCUAGCCUUCGUCUU	102	21(-):25693363-25693464
ola-miR-21	UAGCUUAUCAGACUGGUGUUG	21	ola-mir-21-2	CCCGGCCUGUCAGAUAGCUUAUCAGACUGGUGUUGGCUGUUAAGAUUGCAAGGCGACAACAGUCUGUAGGCUGUCUGACAUUUUGGG	87	14(+):22568052-22568138
ola-miR-21	UAGCUUAUCAGACUGGUGUUG	21	ola-mir-21-1	ACUUCACCACCUUGUCGGCUAGCUUAUCAGACUGGUGUUGGAGGUUCCAUUUGCACGGCAACAACGGUCUGUAAGCUGGCUGACAUUGUGGGGCU	95	13(-):24451854-24451948
ola-miR-210-5p	AGCCACUGACUAACGCACAU	20	ola-mir-210	UCCGAGUUCUAAAAGCAGGUAAGCCACUGACUAACGCACAUUGUGCGUGUGACAGAUCCACUGUGCGUGUGACAGCGGCUAACCUGGUUUUGGGAAAACCUCUGA	105	scaffold676(+):57142-57246
ola-miR-22	AAGCUGCCAGCUGAAGAACUG	21	ola-mir-22-2	UAUAGCUGACACACAGCUGUUCUUCACUGGCAAGCUUUAUGUUUCUAUACACAUGCUAAAGCUGCCAGCUGAAGAACUGCUCUGGUCAGCCCUG	94	14(-):8560446-8560539
ola-miR-22	AAGCUGCCAGCUGAAGAACUG	21	ola-mir-22-1	ACUGGCUGACCCACAGCAGUUCUUCACUGGCAAGCUUUAUGUUCUCGUGCACCAGCUAAAGCUGCCAGCUGAAGAACUGUUGUGGUCGGCUCUU	94	13(-):16589470-16589563
ola-miR-223	UGUCAGUUUGUCAAAUACCC	20	ola-mir-223	GACCAGGCCCCCCACUUAGUGUAUUUGACAAGCUGAGUUGGACACUCUAUCUCUGUGAGUGUCAGUUUGUCAAAUACCCCAAGUGAGGUGUCACUUGUC	99	14(-):17328705-17328803
ola-miR-24b-5p	UGCCUACUGAGCUGAUAACAGU	22	ola-mir-24b	GCUGCUGCUUGGGCUCAACCUCCAGUGCCUACUGAGCUGAUAACAGUUUUACCUGAAACAAGUACUGGCUCAGUUCAGCAGGAACCGGAGUUAGGCCCUCUAGAGAC	107	17(-):29776748-29776854
ola-miR-24c	UGGCUCAGUUCAGCAGAA	18	ola-mir-24c	UAAAAUCCAUAGUGAUAUUCAUUACUUUAAUGCAAGCUGAGAGAAGUGAGCAUGAUUCAAUGGCUCAGUUCAGCAGAACAAUGUCUUAACCUUUUA	96	9(+):7539271-7539366
ola-miR-26	UUCAAGUAAUCCAGGAUAGGC	21	ola-mir-26-3	UGCGUUGUUGCUGGAACCAGGUUCAAGUAAUCCAGGAUAGGCUUUCUGCAUCUGAUUUGGCCUAUACUUGAUUACUUGCACUUGGAACCAGUUCCUGACCCA	102	20(+):16297176-16297277
ola-miR-26	UUCAAGUAAUCCAGGAUAGGC	21	ola-mir-26-2	GCCUGACUGGCUGUUAUCAAGUUCAAGUAAUCCAGGAUAGGCUGUUUGUAUCCUGGUUGGCCUAUUCAUGAUUACUUGCACUGGGUGGCAGCUCCUAGAU	100	17(-):17792213-17792312
ola-miR-26	UUCAAGUAAUCCAGGAUAGGC	21	ola-mir-26-1	GUCUCUGGGCCUCUGCCUGGUUCAAGUAAUCCAGGAUAGGCUGGUUAACACUGGCACGGCCUAUUCUUGAUUACUUGUUUCAGGAACCGGCCAUAAGC	98	7(-):26163773-26163870
ola-miR-27b-5p	AGAGCUUAGCUAAUUGGUGAGC	22	ola-mir-27b	GCUCUCUCGCUAAAGGCACAGAGCUUAGCUAAUUGGUGAGCAUUGAUCCCUGCUGUGUGUUGUUCACAGUGGCUAAGUUCAGUGCCGGAGGUGAAAUGAUU	101	4(+):34610548-34610648
ola-miR-27c-5p	AGGACUUAGCCCACAUGUGAAC	22	ola-mir-27c	AUUCUAGCCUGGCUGUGCGGCAGCAGGACUUAGCCCACAUGUGAACAGUGAGUGUAUGCCAUGUUCACAGUGGUUAAGUUCUGCCGCCACAGGGCUGCAGCCAGCAU	107	8(-):13688175-13688281
ola-miR-27d-3p	UUCACAGUGGCUAAGUUC	18	ola-mir-27d	UUGGGCUCAGAUGCAGGACUUAGUUCAUUGGUGAGCAUUGAGCCACACAGGAAUUGUUCACAGUGGCUAAGUUCAGUACCUGACCUGA	88	17(-):31554033-31554120
ola-miR-29a	AGCACCAUUUGAAAUCGGUUAC	22	ola-mir-29a	GUCCUCUUUCCAAGGUUGACCGAUUUCUUUUGGUGUUCAGAGUCCGUUCUGUUUCUAGCACCAUUUGAAAUCGGUUACAGUGAAGGACAGAU	92	7(+):23588631-23588722
ola-miR-301a-3p	GUGCAAUAGUAUUGUCAAAGCA	22	ola-mir-301a	GCCCGAGCUGUUGGCAGGUGCUCUGACUUCAUUGCACUACUGUAUCAGACAUCUAGUAGUGCAAUAGUAUUGUCAAAGCAUUUGAAAACUGCAAAGAGC	99	14(+):13145539-13145637
ola-miR-301b-5p	GCUCUGACAAUGUUGCACUAC	21	ola-mir-301b	CUGACACAUGCUGAGGUCAGCUGCUCUGACAAUGUUGCACUACUGUACCAUCCAUUCUAGCAGUGCAAUAGUAUUGUCAUAGCAUUUGGCCUCAGCUCGCUCUAG	105	12(-):14199739-14199843
ola-miR-30a-3p	CUUUCAGUCGGAUGUUUGC	19	ola-mir-30a	GGUCCAGUUGGCAGUCGGGGCUACUGUAAACAUCCUUGACUGGAAGCUGGUGUUGAUUUCUGGGGCUUUCAGUCGGAUGUUUGCAGGAGCCAACUGCUAGUUCC	104	ultracontig66(+):99987-100090
ola-miR-30c	UGUAAACAUCCUACACUCUCAGC	23	ola-mir-30c	ACCACUCUCUGAAUCUAAUGGAAAUGUAAAUUUGUUGUCUUGUAGACUGUCUCCAGGCAUGUAAACAUCCUACACUCUCAGCUGUGUUGUCAUGGAGCUGGGAGAGGGGU	110	11(+):21880471-21880580
ola-miR-30d-3p	CUUUCAGUCUGAUGUUUGCAGC	22	ola-mir-30d	GUCACACUUUGGCACUUUGGGGUUGUAAACAUCCCCGACUGGAAGCUGUGUCUGCGCAGAGCUUUCAGUCUGAUGUUUGCAGCUGCAGGUUGCUCCGUUCUCCAC	105	11(+):24547813-24547917
ola-miR-30d-5p	UGUAAACAUCCCCGACUGGAAGC	23	ola-mir-30d	GUCACACUUUGGCACUUUGGGGUUGUAAACAUCCCCGACUGGAAGCUGUGUCUGCGCAGAGCUUUCAGUCUGAUGUUUGCAGCUGCAGGUUGCUCCGUUCUCCAC	105	11(+):24547813-24547917
ola-miR-30e	CUUUCAGUCGGAUGUUUGC	19	ola-mir-30e	UGGAAGCUGGGAUUUUGUCAGUGUGGGCUUUCAGUCGGAUGUUUGCAUCAUCUUAUUGCCACAAACCACCAACAGAAACCCUAUUGCCAACAUGCAUUGAUAUUUG	106	11(+):21880298-21880403
ola-miR-33	CAAUGUACCUGCAGUGCAA	19	ola-mir-33	CGGCCAGAGCUGCAGUGCAUUGUAGUUGCAUUGCAUGUAUGUUUCUCAAAGUGCAAUGUACCUGCAGUGCAACACAGAGCUGGACCACAAACUG	94	8(+):12694467-12694560
ola-miR-338-3p	UCCAGCAUCAGUGAUUUUGUU	21	ola-mir-338-2	UGGUGUUGUUGUCUCCUGGAAACAACAUCCUGAUGCUGUCUGGGUGUGGAAAAGCAGAACUCCAGCAUCAGUGAUUUUGUUGCUGGGGGAGAGCAAAAUCUG	102	19(-):2103870-2103971
ola-miR-338-3p	UCCAGCAUCAGUGAUUUUGUU	21	ola-mir-338-1	ACUGGCUGGUCCCAGAAACAACAUCCUGGUGCUGCCUGAGUGUGUAAUGCAAACUCCAGCAUCAGUGAUUUUGUUGCUGGGGGCGUGCCCCU	92	8(-):10136028-10136119
ola-miR-338-3p	UCCAGCAUCAGUGAUUUUGUU	21	ola-mir-338-3	GAACUUCACGGCCACUUCCUGAAACAAUAUCCUGGUGCUGCCCGAGUGCGGCUCACAGACUCCAGCAUCAGUGAUUUUGUUGCAGGCGGUGGCCACGCCUC	101	ultracontig221(-):99754-99854
ola-miR-338-5p	AACAACAUCCUGGUGCUGCCUGAGU	25	ola-mir-338-1	ACUGGCUGGUCCCAGAAACAACAUCCUGGUGCUGCCUGAGUGUGUAAUGCAAACUCCAGCAUCAGUGAUUUUGUUGCUGGGGGCGUGCCCCU	92	8(-):10136028-10136119
ola-miR-430a	UAAGUGCUACUUGUUGGGGUA	21	ola-mir-430a-3	GGACAUCAAGAUGACCUUGACACAGGCACUGACUCUUUCUUCUUUGUAGUAAGUGCUACUUGUUGGGGUAAUUUUGGUGUCC	82	4(+):2065212-2065293
ola-miR-430a	UAAGUGCUACUUGUUGGGGUA	21	ola-mir-430a-2	GGACAUCAAGAUGACCUUGACACAGGCACUGACUCUUUCUUCUUUGUAGUAAGUGCUACUUGUUGGGGUAAUUUUGGUGUCC	82	4(+):2064352-2064433
ola-miR-430a	UAAGUGCUACUUGUUGGGGUA	21	ola-mir-430a-4	GGACAUCAAGAUGACCUUGACACAGGCACUGACUCUUUCUUCUUUGUAGUAAGUGCUACUUGUUGGGGUAAUUUUGGUGUCC	82	4(+):2068492-2068573
ola-miR-430a	UAAGUGCUACUUGUUGGGGUA	21	ola-mir-430a-1	GGACAUAAAGAUGACCUUGACACAGGCACUGACUCUUUCUUCUUUGUAGUAAGUGCUACUUGUUGGGGUAUUUUUGGUGUCC	82	4(+):6743-6824
ola-miR-430d	UAAGUGCUUCUCUUUGGGGUUG	22	ola-mir-430d-3	GAAUCGCUUCGAGGCCAUCUCAAACAGAGACACUGAUGGUUUUGAUUUCCUAAGUGCUUCUCUUUGGGGUUGUCUCAAUGUUGGUUU	87	4(+):2069008-2069094
ola-miR-430d	UAAGUGCUUCUCUUUGGGGUUG	22	ola-mir-430d-1	GAAUCGCUUCGAGACCAUCUCAAACAGAGACACUGAUGGUUUUGAUUUCCUAAGUGCUUCUCUUUGGGGUUGUCUCAAUGUUGGUUU	87	4(-):2061569-2061655
ola-miR-430d	UAAGUGCUUCUCUUUGGGGUUG	22	ola-mir-430d-2	GAAUCGCUUCGAGGCCACCUCAAACAGAGACACUGAUGGUUUUGAUUUCCUAAGUGCUUCUCUUUGGGGUUGUCUCAAUGUUGGUUU	87	4(+):2064788-2064874
ola-miR-458	AUAGCUCUUUCAAUGGUACUGC	22	ola-mir-458	CUCCACCGGCUGCAGACUCCAGCGCCAUUUUCAGAGCUAUAAGUGUGAAGUGAUGAUAGCUCUUUCAAUGGUACUGCAGUAAGCAUUCACAUGAG	95	10(-):25327849-25327943
ola-miR-460-5p	CCUGCAUUGUACACACUGUG	20	ola-mir-460	UGGGCUUUACAGUUCCUGCAUUGUACACACUGUGCAUAUAUGUUACAUAAGCACAGCGCAUACAAUGUGGAUGCUGUGCUACCCA	85	17(-):29024041-29024125
ola-miR-462	GUAACGGAACCCAUAAUGC	19	ola-mir-462	GAUUGUAACGGAACCCAUAAUGCAGCUGUAAUAAUAUGUCCCAGCUGGUUAUGGGGUCCGUUUCCAUC	68	7(+):6519353-6519420
ola-miR-731	AAUGACACGUUUUCUCCC	18	ola-mir-731	UUCUUGGUGUUUUUCCUCAAUGACACGUUUUCUCCCGGAUUGCUGGCAAAUGAAAGCGCAACCGGGAAUUCCGUGUCAGCCAAGAAUAACGCCAGCAA	98	7(+):6519816-6519913
ola-miR-92a	UAUUGCACUUGUCCCGGCCUG	21	ola-mir-92a-1	CAGAAGCGAACCCUUUCUGUGCAGGUUGGGAGAGGUGGCAAUGCUCUGUGCUUGGGGUGGUAUUGCACUUGUCCCGGCCUGUUGAGGACAUGGGGACUGUUCUG	104	21(-):25693131-25693234
ola-miR-92a	UAUUGCACUUGUCCCGGCCUG	21	ola-mir-92a-2	UGGAAGAUGUCCUGUCCUGUGCAGGUGGGGAUUAGUAGCAAUGCUGUUCUCCACGAGGUAUUGCACUUGUCCCGGCCUGUAAAGGAACGGGGAGAUGAAGCUG	103	3(+):15108084-15108186
ola-miR-92b	UAUUGCACUUGUCCCGGCCUCCC	23	ola-mir-92b	UUCCUCCCGAGGUCGGGCAGGUGCGGGAUGCAGUGCACUGUUGUCGUGUUCCCCCUCCAAUAUUGCACUUGUCCCGGCCUCCCCGGCCCCCGGGGCUAAGAA	102	16(+):29384732-29384833
ola-miR-99	CAAGCUCGCCUCUGUGGGUCUC	22	ola-mir-99	UGGUAUUUUGGCCAUUUGGCACAAACCCGUAGAUCCGAUCUUGUGGAAAAUCUGACGGCACAAGCUCGCCUCUGUGGGUCUCUGUCAGUGUGGUGUGAACACCG	104	14(-):1151199-1151302
oni-let-7a	UGAGGUAGUAGGUUGUAUAGUU	22	oni-let-7a-5	UGAGGUAGUAGGUUGUAUAGUUCAGAGUGACACCACAGGAGAUAACUGUACAGCCUCCUAGCUUUCC	67	CM001453.1(+):8885064-8885130
oni-let-7a	UGAGGUAGUAGGUUGUAUAGUU	22	oni-let-7a-2	UGAGGUAGUAGGUUGUAUAGUUUUAGGGUCGUACCCUUCCUGUCAGAUAACUAUACAACUUACUGUCUUUCCU	73	CM001456.1(-):31764270-31764342
oni-let-7a	UGAGGUAGUAGGUUGUAUAGUU	22	oni-let-7a-4	UGAGGUAGUAGGUUGUAUAGUUUUAGGGUCAUACCCACACUGGGAGAUAACUAUUCAACCUACUGUCUUUCC	72	CM001448.1(+):2643829-2643900
oni-let-7a	UGAGGUAGUAGGUUGUAUAGUU	22	oni-let-7a-1	UGAGGUAGUAGGUUGUAUAGUUGAGAAUUACACCCCGGGAGAUAACUGUACAACCUCCUAGCUUUCC	67	CM001457.1(-):400527-400593
oni-let-7a	UGAGGUAGUAGGUUGUAUAGUU	22	oni-let-7a-3	UGAGGUAGUAGGUUGUAUAGUUUGGUGGGUGGGACUGCACCCUGCUCAGGUGAUAACUAUACAGUCUAUUGCCUUCCC	78	CM001463.1(-):24110275-24110352
oni-let-7a	UGAGGUAGUAGGUUGUAUAGUU	22	oni-let-7a-6	UGAGGUAGUAGGUUGUAUAGUUUGUGGGAUGGACUCAAUCCUAUUCAGGUGAUAACUAUACAGCCUAUUACCUUCC	76	CM001448.1(-):28845763-28845838
oni-let-7d	UGAGGUAGUUGGUUGUAUGGUU	22	oni-let-7d-2	UGAGGUAGUUGGUUGUAUGGUUUCGCAUAAUAAACAGCCUGGAGAUAACUGUACAACCUUCUAGCUUUCC	70	CM001464.1(+):9141557-9141626
oni-let-7d	UGAGGUAGUUGGUUGUAUGGUU	22	oni-let-7d-1	UGAGGUAGUUGGUUGUAUGGUUUCGCAUAAUAAAUAGCACGGAGAUAACUGUACAACCUUCUAGCUUUCC	70	GL831431.1(+):207596-207665
oni-let-7f	UGAGGUAGUAGAUUGUAUAGUU	22	oni-let-7f	UGAGGUAGUAGAUUGUAUAGUUUUAGGGUAGUGAUUUUGCCCUCUUUAGGAGAUAACUAUACAAUCUAUUGCCUUCCC	78	CM001448.1(+):2644014-2644035
oni-miR-100	AACCCGUAGAUCCGAACUUGUG	22	oni-mir-100-1	AACCCGUAGAUCCGAACUUGUGUUAAGUGACACCACAAGCUUGUAUCUACAGGUCUG	57	CM001457.1(-):402008-402064
oni-miR-100	AACCCGUAGAUCCGAACUUGUG	22	oni-mir-100-2	AACCCGUAGAUCCGAACUUGUGGUGACUGGCUGCACAAGCUCGUAUCUAUAGGUAUG	57	CM001453.1(+):8884551-8884607
oni-miR-10544	UAGGCGUGUCACUGCGUGUCACA	23	oni-mir-10544	UAGGCGUGUCACUGCGUGUCACAGUCACUGCUUGCGCACGGGGCCACGCCCUGC	54	CM001459.1(+):19615093-19615146
oni-miR-10545	UAAGUCUCACACCAGUGCAAAAC	23	oni-mir-10545	UAAGUCUCACACCAGUGCAAAACAAAAAUCAUGACGCUGCUCAGGUGUGGGACCAUA	57	CM001462.1(-):5316559-5316615
oni-miR-10551	AGGAAAUCUGCUUCUGUUGGUUU	23	oni-mir-10551	AGGAAAUCUGCUUCUGUUGGUUUGGUAUUACUAAAAAAUCACAGGAGCAGAGUUUUUCC	59	CM001461.1(-):14979855-14979913
oni-miR-10578	UGCAGUGAGUCAGUCUGAAGCU	22	oni-mir-10578	UGCAGUGAGUCAGUCUGAAGCUGUCUGACUGUAUCAGCUGACAGAUGGCUCUCUGAAGU	59	CM001463.1(-):31197043-31197101
oni-miR-10587	UCGGUCGAGUUUCUUUGUUGGA	22	oni-mir-10587	CAACAAAGAGGCUUGUGGGUCUUUGUUCGCUUUUUUGGAUCGGUCGAGUUUCUUUGUUGGA	61	CM001458.1(-):11667759-11667819
oni-miR-10622	UGUAGAGUCUGUGUGUGGAGCU	22	oni-mir-10622-2	UGUAGAGUCUGUGUGUGGAGCUUCUGUAGUUUGUGUUGAAGCGUCCACACUCAGCUCUGCAGC	63	CM001452.1(+):8798591-8798653
oni-miR-10622	UGUAGAGUCUGUGUGUGGAGCU	22	oni-mir-10622-1	UGUAGAGUCUGUGUGUGGAGCUUCUGCAGUUUGUGUUGAAGCGUCCACACUCAGCUCUGCAGC	63	CM001444.1(-):2327752-2327814
oni-miR-10622	UGUAGAGUCUGUGUGUGGAGCU	22	oni-mir-10622-3	UGUAGAGUCUGUGUGUGGAGCUUCUGUAGUUUGUGUUGAAGCGUCCACACUCAGCUCUGCAGC	63	CM001453.1(+):10108301-10108363
oni-miR-10633	UGGCAUUGUGGGAUAGAAGCUC	22	oni-mir-10633	UGGCAUUGUGGGAUAGAAGCUCAGUAUCAGCUGGUUCUGUGACUGUCUCUCUCUAUCAGCUACAGUGCCUG	71	CM001458.1(+):12946403-12946473
oni-miR-10650	ACCCCAUGAUGAAUCUCUGAAG	22	oni-mir-10650	ACCCCAUGAUGAAUCUCUGAAGGUGAAUCUCCAUCGAGAGGCUAAUAUCAAGUUCACUGUGGACGUGCACC	71	CM001461.1(-):318447-318517
oni-miR-10651	UGAGCAGGGCUGUGUUUUUGAGC	23	oni-mir-10651	UUAAAAACAGGCCCUGGUGACACAGGAGCUGCGGUGCAGCGGUGUGAGCAGGGCUGUGUUUUUGAGC	67	GL831288.1(+):173517-173583
oni-miR-10659	AGAGGCGUCCUGGAGAGGUAGA	22	oni-mir-10659	AGAGGCGUCCUGGAGAGGUAGAGCCUGCGCGUCUCUCCUCUCUCCAAGGCGUCUCUUC	58	GL831239.1(-):163620-163677
oni-miR-10720	AGUGACUGAGCCUGUAAAGACA	22	oni-mir-10720-2	AGUGACUGAGCCUGUAAAGACAAUUUCUUGAUGUCUUUACAGGCUCAGUCACUCA	55	CM001463.1(-):18703312-18703366
oni-miR-10720	AGUGACUGAGCCUGUAAAGACA	22	oni-mir-10720-1	AGUGACUGAGCCUGUAAAGACAUCAAGAAAUUGUCUUUACAGGCUCAGUCACUCA	55	CM001463.1(+):18703314-18703368
oni-miR-10726	CCUGGGACUGUUGUGGAGGCCC	22	oni-mir-10726	CCUGGGACUGUUGUGGAGGCCCUUUCUAAUAAGGUUGCGGCCCUCCAUGACAGUCCCAACUC	62	CM001448.1(+):19238516-19238577
oni-miR-10790	UUUAUUUCUCUCUCUGUCUGCCG	23	oni-mir-10790	ACAGCGGAGGAGAAAUAAAGAGGGGCUCUUUAUUUCUCUCUCUGUCUGCCG	51	CM001453.1(+):6548233-6548283
oni-miR-10802	CUGUGAGCUUUGAGUCGGCAGC	22	oni-mir-10802	UGCCAACUCUCGGUUCUCUGACUCCAAAAUGGCGGUUUGAGACGCCGAGCGAGUCUGUGAGCUUUGAGUCGGCAGC	76	CM001458.1(-):20835236-20835311
oni-miR-10858	UGUGUUCAGGCUCUGGCUGACA	22	oni-mir-10858	CAGCAGCCGGAGCCCGAACACAUCGAGGGGAACGAUGUGUUCAGGCUCUGGCUGACA	57	CM001460.1(-):12273113-12273169
oni-miR-10862	UGUCCUCUGAUUGGCUCGGA	20	oni-mir-10862	UGUCCUCUGAUUGGCUCGGACAACCCCCUCUGACAUGCCCGUGGCCAAUCAGAGGUGAGU	60	GL831336.1(-):552966-553025
oni-miR-10889	CUCAGUGAGCUGGAUCAGAGCC	22	oni-mir-10889	AGCUGAUCUCUUGUUUUCAUUGAAGCUGUUUCCUCUCAGCAGCUCAGUGAGCUGGAUCAGAGCC	64	CM001455.1(-):29839053-29839116
oni-miR-10890	UGCACUCUGCACACCCACUUCU	22	oni-mir-10890	AGGUGGAUGUGUGGUGGGGUUAAAGGAAUCUGAUUUUGAGAUUGUGGUCAUGCUCCUGCACUCUGCACACCCACUUCU	78	CM001450.1(+):9305709-9305786
oni-miR-10913	UAGCCCGGGCUGCUCUGCUGA	21	oni-mir-10913	AGCUGUAGCUGUGGGCCGGGGGGUGAGCUACCUAGCCCGGGCUGCUCUGCUGA	53	GL831184.1(+):2800015-2800067
oni-miR-10914	UGUUCCCUGUUGUUCUGUAGGGUC	24	oni-mir-10914	UGUUCCCUGUUGUUCUGUAGGGUCUGCAAGCACCUUAAAUCCACCCUUUAAUAACAGGGGAGUGGC	66	CM001454.1(+):14337675-14337740
oni-miR-10926	AUCCCAGCGGUGCCUCCA	18	oni-mir-10926	AUCCCAGCGGUGCCUCCAGAAUUGUGUAACACCCGUCCCACGUUCUAUUGAGAGGGGCCCUGGGUUCC	68	GL831968.1(+):50380-50447
oni-miR-10928	AAGCACAGACUCUGGCUCAGGACU	24	oni-mir-10928	AAGCACAGACUCUGGCUCAGGACUUGUUUGAAUUUCUCACUUCCUGUGCUGCAGUUUGUUGC	62	GL831231.1(+):1869639-1869700
oni-miR-10934	CCGCCGUGUCAGAUCUACUGGA	22	oni-mir-10934	CCGCCGUGUCAGAUCUACUGGAACUGGCUCGUCCAGCAGAUACCGACAUGGAUCGCA	57	CM001460.1(+):19446995-19447051
oni-miR-10942	CUUCCACAGUGCACUGAAA	19	oni-mir-10942	CUUCCACAGUGCACUGAAAUGCAUGGUGCACAAAGCGGGCCAGCGCAUGAAUUUAAAUGUCAAGUGCACUUGAGCGGGCA	80	CM001448.1(-):37350501-37350580
oni-miR-10955	AUCCCCGUAUGGGCCACCA	19	oni-mir-10955	CUGGUUCGUUGAUUAAAGGAUCAGCAGUCGCCCUCGUAGCAUGCUGAUCCCCGUAUGGGCCACCA	65	GL831705.1(+):83444-83508
oni-miR-10965	UGUGGCUGUUUCUGAGCUC	19	oni-mir-10965	UGUGGCUGUUUCUGAGCUCUGGAUUGCUUUAGCGUUAGCCACUCU	45	CM001457.1(-):6398275-6398319
oni-miR-10d	ACCCUGUAGAUCCGAAUUUGUG	22	oni-mir-10d	ACCCUGUAGAUCCGAAUUUGUGUAAAUACAGCAGCAGCCACAAAUUCGCAUCUUGGGGAGU	61	CM001451.1(+):25799055-25799115
oni-miR-124b	UCAAGGUCCGCUGUGAACACG	21	oni-mir-124b-1	CAUUCACCGCGUGCCUUAAUUGUAAGACAUUAAAUCAAGGUCCGCUGUGAACACG	55	CM001452.1(+):10547290-10547344
oni-miR-124b	UCAAGGUCCGCUGUGAACACG	21	oni-mir-124b-2	CAUUCACCGCGUGCCUUAAUUGUAUGGACAUUUAAAUCAAGGUCCGCUGUGAACACG	57	CM001458.1(-):13597516-13597572
oni-miR-132c	AGCCAUGACUGUAGACUGUUACU	23	oni-mir-132c	AGCCAUGACUGUAGACUGUUACUGUACUUUGAUACUGUAUAAGCAGUAAGCAGUCUAAAGCCAAGGUGC	69	GL831384.1(-):414692-414760
oni-miR-132d	ACCAUGGCUGUAGACUGUUACC	22	oni-mir-132d	ACCAUGGCUGUAGACUGUUACCAUGGUGCUGUUGCUAGAGUAACAAUCUAAAGCCACGGUC	61	GL831384.1(-):415083-415143
oni-miR-135a	UAUGGCUUUUUAUUCCUAUCUG	22	oni-mir-135a	UAUGGCUUUUUAUUCCUAUCUGACUGUACUUAUGGUUCAUAUAGGGAUGGAAGCCAUGCA	60	CM001463.1(-):31197392-31197451
oni-miR-1388	AGGACUGUCCAACCUGAGAAUG	22	oni-mir-1388	AGGACUGUCCAACCUGAGAAUGGUGAUUUUAGGCUCAAUCUCAGGUUCGUCAGCCCAUG	59	CM001463.1(-):14300136-14300194
oni-miR-142b	UAGUGCUUUCUACUUUAUGGAU	22	oni-mir-142b	UCCAUAAAGUAGGAAACACUACACUGUGGCGAGGAGUUUAGUAGUGCUUUCUACUUUAUGGAU	63	GL831331.1(+):273768-273830
oni-miR-144a	GGAUAUCAUCUUAUACUGUAAGU	23	oni-mir-144a	GGAUAUCAUCUUAUACUGUAAGUUUAUUAAAGAGACACUACAGUAUAGAUGAUGUACU	58	GL831331.1(+):655264-655321
oni-miR-145	GUCCAGUUUUCCCAGGAAUCCCU	23	oni-mir-145	GUCCAGUUUUCCCAGGAAUCCCUUGACCUAUCAGAAAGGGGGAUUCCUGGAAAUACUGUUCUU	63	CM001448.1(+):32184750-32184812
oni-miR-147	GUGUGCGGAAAUGCUUCUGCUC	22	oni-mir-147	ACAGAAUCGUUUCUGCACAAACUAGGACACUUUGACACUCAGUGUGCGGAAAUGCUUCUGCUC	63	CM001444.1(-):3671514-3671576
oni-miR-148-5p	AAGUUCUGUGAUACACUUAGACU	23	oni-mir-148	AAGUUCUGUGAUACACUUAGACUCUAACUGCCCGCAGUCAGUGCAUUACAGAACUUUG	58	CM001459.1(-):15445884-15445941
oni-miR-150	ACUCCCAAUCCUUGUACCAGUGUC	24	oni-mir-150	ACUCCCAAUCCUUGUACCAGUGUCUUGACACCAGUGACGCUGGACAGGUUUUGGGGGGG	59	GL831541.1(-):143888-143946
oni-miR-155	UUAAUGCUAAUCGUGAUAGGGGU	23	oni-mir-155	UUAAUGCUAAUCGUGAUAGGGGUUGUUCUUAUUAACAGACACCUAACAUGUUAGCAUUAGCU	62	CM001444.1(+):7366056-7366117
oni-miR-15b	UAGCAGCGCAUCAUGGUUUGA	21	oni-mir-15b	UAGCAGCGCAUCAUGGUUUGAAACAAUGUGGAAAAGGUGCGAACCAUAAUUUGCUGCUUUA	61	CM001457.1(+):18536826-18536886
oni-miR-15c	CAAAUCAUUAUGUGCUGCCACU	22	oni-mir-15c	UAGCAGCAUAUCAUGUUUUGCAGAUGUGCUGAAUCGCUUCAAAUCAUUAUGUGCUGCCACU	61	CM001446.1(+):924982-925042
oni-miR-16b	UAGCAGCACGUAAAUAUUGGAG	22	oni-mir-16b	UAGCAGCACGUAAAUAUUGGAGUUAACACUCUAGCUGAAGUCUCCAGUAUUGAUCGUGCUGCUGAA	66	CM001459.1(+):12109046-12109111
oni-miR-17a	CAAAGUGCUUACAGUGCAGGUA	22	oni-mir-17a-1	CAAAGUGCUUACAGUGCAGGUAGUACUAUGGAAUACCUACUGCAGUGGAGGCACUUACAGC	61	CM001444.1(+):7384950-7385010
oni-miR-17a	CAAAGUGCUUACAGUGCAGGUA	22	oni-mir-17a-2	CAAAGUGCUUACAGUGCAGGUAGUUUUGUUCAAUUCUACUGCAGUGAAGGCACUUUCAGC	60	GL831311.1(+):1392624-1392683
oni-miR-17b	ACCUGCACUGUAAGCACUUUGGC	23	oni-mir-17b-1	UGUAAGUGCCUCCACUGCAGUAGGUAUUCCAUAGUACUACCUGCACUGUAAGCACUUUGGC	61	CM001444.1(-):7384948-7385008
oni-miR-17b	ACCUGCACUGUAAGCACUUUGGC	23	oni-mir-17b-2	UGAAAGUGCCUUCACUGCAGUAGAAUUGAACAAAACUACCUGCACUGUAAGCACUUUGGC	60	GL831311.1(-):1392622-1392681
oni-miR-181a	CACAUUCAUCGCUGUCGGUGGG	22	oni-mir-181a	CACAUUCAUCGCUGUCGGUGGGUUAGUAAUGGCAUAAACUCGCCGGGCGAUGAAUGACAAC	61	CM001447.1(-):13318671-13318731
oni-miR-181b	AACAUUCAUUGCUGUCGCUGGGU	23	oni-mir-181b	AACAUUCAUUGCUGUCGCUGGGUUGGACUGUGUAGAAAAGCUCACUGAACAAUGAGUGCAAC	62	CM001461.1(+):8793414-8793475
oni-miR-184c	UGGGCUGGAAAAGUGAUAAGGAG	23	oni-mir-184c	CCUUAUCAGUUCUCCGUCCAACGGAUACAGAAUCUAUAGCUGGGCUGGAAAAGUGAUAAGGAG	63	CM001444.1(-):18708273-18708335
oni-miR-184d	CUGGGCUGGAAAAGUGAUAAGG	22	oni-mir-184d	CCUUAUCAGUUCUCCGUCCAACAAACAUUUAAUAGAUAGCUGGGCUGGAAAAGUGAUAAGG	61	CM001450.1(-):39659039-39659099
oni-miR-18b	UAAGGUGCAUCUAGUGUAGUU	21	oni-mir-18b	UAAGGUGCAUCUAGUGUAGUUAGUGAAGUAUUCAAAGUCUACUGCCCUAGUUGCCCCUUCUGU	63	CM001449.1(-):27554497-27554559
oni-miR-194b	UGUAACAGCAUCUCCAUAUGGA	22	oni-mir-194b	UGUAACAGCAUCUCCAUAUGGAAAAACUGUGGCUUCCAGUGGAGCUGCUGUUAUCUG	57	CM001445.1(+):14802423-14802479
oni-miR-196b	UAGGUAGUCUCAUGUUGUUGGGC	23	oni-mir-196b	UAGGUAGUCUCAUGUUGUUGGGCUAUAUUAUUUCUCCCACAACACGAAACUGCCUUGA	58	CM001454.1(-):6204066-6204123
oni-miR-199b	UAACCAAUGUGCAGACUACUGU	22	oni-mir-199b-2	UAACCAAUGUGCAGACUACUGUACACCAGUAAGAUCCUGAACAGGUAGUCUGAACACUGGGAUGA	65	CM001465.1(-):13839759-13839823
oni-miR-199b	UAACCAAUGUGCAGACUACUGU	22	oni-mir-199b-3	UAACCAAUGUGCAGACUACUGUACACCAGUAUGACAAUGAACAGGUAGUCUGAACACUGGG	61	GL831264.1(+):905752-905812
oni-miR-199b	UAACCAAUGUGCAGACUACUGU	22	oni-mir-199b-1	UAACCAAUGUGCAGACUACUGUACAACCACUACUUCCUGAACAGGUAGUCUGAACACUGGGCAG	64	CM001450.1(-):27355400-27355463
oni-miR-199c	AACCAAUGUGCAGACUACUGUU	22	oni-mir-199c	AACCAAUGUGCAGACUACUGUUCAGCUGCAGCCUGAUGAACAGGUAGUCUGAACACUGGGCAG	63	CM001447.1(+):16325881-16325943
oni-miR-19c	UGUGCAAAUCCAUGCAAAGCUCU	23	oni-mir-19c	AGUUUUGAUGGCUUGCUCUCAGCUUCUGAAAGACUCUGCUGUGCAAAUCCAUGCAAAGCUCU	62	CM001449.1(-):27553256-27553317
oni-miR-20	UAAAGUGCUUAUAGUGCAGGUAG	23	oni-mir-20-2	UAAAGUGCUUAUAGUGCAGGUAGUCUUCUUACUGUUUAAAUUCUACUGCAAUGUGAGCACUUCAAGU	67	GL831311.1(+):1393406-1393472
oni-miR-20	UAAAGUGCUUAUAGUGCAGGUAG	23	oni-mir-20-1	UAAAGUGCUUAUAGUGCAGGUAGUGUUUUGCACAAUCUACUGCAAUGUAAGCACUUGAAGU	61	CM001444.1(+):7385496-7385556
oni-miR-203b	UUGAACUGUUGAGAACCACUUA	22	oni-mir-203b	AGUGGUCCUAAACAUUUCACAAUUUUGUUAAAGAACUGUUGAACUGUUGAGAACCACUUA	60	CM001462.1(-):1021132-1021191
oni-miR-204a	UUCCCUUUGUCAUCCUAUGCCU	22	oni-mir-204a-1	UUCCCUUUGUCAUCCUAUGCCUGGAGCUUCUGUAAGGCAGGGACAGCAAAGGGGAGC	57	CM001444.1(-):27571625-27571681
oni-miR-204a	UUCCCUUUGUCAUCCUAUGCCU	22	oni-mir-204a-3	UUCCCUUUGUCAUCCUAUGCCUGGAUUAAUACAAAAGGGGCUGGGAAGGCAAAGGGACG	59	CM001455.1(+):11965836-11965894
oni-miR-204a	UUCCCUUUGUCAUCCUAUGCCU	22	oni-mir-204a-2	UUCCCUUUGUCAUCCUAUGCCUGGAACUUGGAUAAGGCAGGGACAGCAAAGGGAUGC	57	CM001450.1(-):38761816-38761872
oni-miR-205	UCCUUCAUUCCACCGGAGUCUG	22	oni-mir-205-1	UCCUUCAUUCCACCGGAGUCUGUGUAAAGUGCCAAUCAGAUUUCAGUGGUUUGAAGAGUA	60	CM001448.1(+):30147827-30147886
oni-miR-205	UCCUUCAUUCCACCGGAGUCUG	22	oni-mir-205-2	UCCUUCAUUCCACCGGAGUCUGUAUCUGUAUUUGACCAGAUUUCAGUGGUGUGAAGUGUAAG	62	CM001463.1(+):7650873-7650934
oni-miR-21	UAGCUUAUCAGACUGGUGUUGGC	23	oni-mir-21-2	UAGCUUAUCAGACUGGUGUUGGCUGUUAAGAUUGCAAGGCGACAACAGUCUGUAGGCUGUC	61	CM001453.1(+):4594249-4594309
oni-miR-21	UAGCUUAUCAGACUGGUGUUGGC	23	oni-mir-21-1	UAGCUUAUCAGACUGGUGUUGGCUGUUGGAUGUGCUUGGCAACAGCGGUCUGUAAGCUGGC	61	CM001457.1(-):9641768-9641828
oni-miR-212a-5p	ACCUUGGCUUUAGACUGCUUACU	23	oni-mir-212a	ACCUUGGCUUUAGACUGCUUACUGCUUAUACAGUAUCAAAGUACAGUAACAGUCUACAGUCAUGGCU	67	GL831384.1(+):414694-414760
oni-miR-216a	AAAUCUCAGCUGGCAACUGUGA	22	oni-mir-216a	AAAUCUCAGCUGGCAACUGUGAGUCGUUCACUAGCUGCUCUCACAAUGGCCUCUGGGAUUAUG	63	CM001456.1(+):20187028-20187090
oni-miR-217	UACUGCAUCAGGAACUGAUUGGC	23	oni-mir-217	UACUGCAUCAGGAACUGAUUGGCUAAUGCUCAAUUGCCAACAGUACCUGAUGCAUUGCC	59	CM001456.1(+):20187605-20187663
oni-miR-2184	AACAGUAAGAGUUUAUGUGCUG	22	oni-mir-2184	AACAGUAAGAGUUUAUGUGCUGUUCUUUAACUCUCAGCACAUGAGCUUUUACGGUGC	57	GL831384.1(-):416520-416576
oni-miR-2187b	UUUAAUUAGUACAGCCUGUAUU	22	oni-mir-2187b	UUUAAUUAGUACAGCCUGUAUUAGUAAUGUCAUCUAUUCUUUACAGGCUAUGCUAAUCUAUG	62	CM001451.1(+):2028260-2028321
oni-miR-2188	AAGGUCCAACCUCACAUGUCCU	22	oni-mir-2188	AAGGUCCAACCUCACAUGUCCUGUGCGGCUGAAGGAAGGCUGUGUGAGGUCAGACCUAUC	60	CM001455.1(-):16421240-16421299
oni-miR-218a	UUGUGCUUGAUCUAACCAUGUG	22	oni-mir-218a-1	UUGUGCUUGAUCUAACCAUGUGACUGCCAGGUUCCUAUCGUGGAACAUGGUUCUUUCAAGCACCAUG	67	CM001449.1(-):18443096-18443162
oni-miR-218a	UUGUGCUUGAUCUAACCAUGUG	22	oni-mir-218a-2	UUGUGCUUGAUCUAACCAUGUGGCCCCGCCUACUGUAACAUCACAUGGUUCCGUCAAGCGCCAGG	65	CM001445.1(+):9061700-9061764
oni-miR-219c-3p	AGAAUUGUGUAUGGACAUCUGU	22	oni-mir-219c	UGAUUGUCCAAACGCAAUUCUUGAGUAAACUCAUAUUCAACCCCAAGAAUUGUGUAUGGACAUCUGU	67	CM001450.1(+):22024213-22024279
oni-miR-219c-5p	UGAUUGUCCAAACGCAAUUCUUG	23	oni-mir-219c	UGAUUGUCCAAACGCAAUUCUUGAGUAAACUCAUAUUCAACCCCAAGAAUUGUGUAUGGACAUCUGU	67	CM001450.1(+):22024213-22024279
oni-miR-219d	AGAAUUGCGUUUGGACAAUCAGC	23	oni-mir-219d-1	AGAUGUCCAUACACAAUUCUUGGGGUUGAAUAUGAGUUUACUCAAGAAUUGCGUUUGGACAAUCAGC	67	CM001450.1(-):22024211-22024277
oni-miR-219d	AGAAUUGCGUUUGGACAAUCAGC	23	oni-mir-219d-2	AGAUGUCCAGGCACAAUUCUCGGGUUGGAUUUGAAAUUUCACAAGAAUUGCGUUUGGACAAUCAGC	66	CM001455.1(-):29502991-29503056
oni-miR-23c	AUCACAUUGCCAGAGAUUACUG	22	oni-mir-23c	UGUGUCUCUGGCAAGAUGAUUUGGUCCACAAAGUUGAAAUCACAUUGCCAGAGAUUACUG	60	CM001450.1(+):30914902-30914961
oni-miR-26a	UUCAAGUAAUCCAGGAUAGGCU	22	oni-mir-26a-2	UUCAAGUAAUCCAGGAUAGGCUGUGUGUAUCCUGGAUGGCCUAUUCGUGAUUACUUGCACU	61	CM001461.1(-):4025926-4025986
oni-miR-26a	UUCAAGUAAUCCAGGAUAGGCU	22	oni-mir-26a-4	UUCAAGUAAUCCAGGAUAGGCUUUCUGCAUCUGCUUUGGCCUAUGCUUGAUUACUUGCACU	61	CM001452.1(+):11561756-11561816
oni-miR-26a	UUCAAGUAAUCCAGGAUAGGCU	22	oni-mir-26a-1	UUCAAGUAAUCCAGGAUAGGCUUGUUAAAGUGGGGAAAGCCUAUUCGGGAUGACUUGGUUC	61	CM001459.1(+):32177981-32178041
oni-miR-26a	UUCAAGUAAUCCAGGAUAGGCU	22	oni-mir-26a-3	UUCAAGUAAUCCAGGAUAGGCUGGUUAACACUGCACGGCCUAUUCUUGAUUACUUGUUUC	60	CM001463.1(+):5182541-5182600
oni-miR-26b	UUCAAGUAAUCCAGGAUAGGUU	22	oni-mir-26b	UUCAAGUAAUCCAGGAUAGGUUUGUUCAGACAAGCACAGCCUAUUCCGGAUGACUUGGUUC	61	GL831181.1(+):3429879-3429939
oni-miR-26c	GCAAGUAAUCACGAAUAGGCC	21	oni-mir-26c	GCAAGUAAUCACGAAUAGGCCAUCCAGGAUACACACAGCCUAUCCUGGAUUACUUGAACU	60	CM001461.1(+):4025929-4025988
oni-miR-26d	CCUAUCCUGGAUUACUUGAACC	22	oni-mir-26d	GCAAGUAAUCAAGCAUAGGCCAAAGCAGAUGCAGAAAGCCUAUCCUGGAUUACUUGAACC	60	CM001452.1(-):11561754-11561813
oni-miR-27d-3p	UUCACAGUGGCUAAGUUCGUC	21	oni-mir-27d	UAGAGCUUAGUUGACUGCUGAACAGGGAGUCUUGAAUAUUUGUUCACAGUGGCUAAGUUCGUC	63	CM001450.1(+):30915106-30915168
oni-miR-27d-5p	UAGAGCUUAGUUGACUGCUGAAC	23	oni-mir-27d	UAGAGCUUAGUUGACUGCUGAACAGGGAGUCUUGAAUAUUUGUUCACAGUGGCUAAGUUCGUC	63	CM001450.1(+):30915106-30915168
oni-miR-29c	CUGAUUUCAUUUGGUGACGUAGA	23	oni-mir-29c	CUGAUUUCAUUUGGUGACGUAGAUGUUUGUACACAGUCUCUAGCACCAUAUGAAAUCAGUGU	62	CM001456.1(-):29863220-29863281
oni-miR-29d	UAGCACCAUUUGAAAUCGGUGUU	23	oni-mir-29d	ACUGGUUUCAGAUGGUGUCUUAGAGUACAAAAUCCCAUCUAGCACCAUUUGAAAUCGGUGUU	62	CM001448.1(-):29993172-29993233
oni-miR-30a	UGUAAACAUCCUUGACUGGAAGCU	24	oni-mir-30a-1	UGUAAACAUCCUUGACUGGAAGCUGGUGUUAGUUUCUGGGGCUUUCAGUCGGAUGUUUGCAGC	63	CM001456.1(+):9400219-9400281
oni-miR-30a	UGUAAACAUCCUUGACUGGAAGCU	24	oni-mir-30a-2	UGUAAACAUCCUUGACUGGAAGCUGAGGUUUUGACAGCGAGGGCUUUCAGUCGGAUGUUUGCAGC	65	CM001464.1(-):13444645-13444709
oni-miR-30c	UGUAAACAUCCUACACUCUCGGC	23	oni-mir-30c	UGUAAACAUCCUACACUCUCGGCAUCUGCCCUCUGGUGGCCGGGAGUGGGACUGUUUGCACU	62	CM001456.1(+):9402811-9402872
oni-miR-30d	UGUAAACAUCCUACACUCAGCU	22	oni-mir-30d	UGUAAACAUCCUACACUCAGCUGUUAUUGAUUGCCACAGAGGCUGAGAGGAGGUUGUUUACUUG	64	CM001464.1(+):17932720-17932783
oni-miR-31	AGGCAAGAUGUUGGCAUAGCUGU	23	oni-mir-31	AGGCAAGAUGUUGGCAUAGCUGUUGAGUUGAAAACCCUGCUAUGCCGACAAAUUGCCAUC	60	CM001446.1(+):8090003-8090062
oni-miR-3120-3p	UGCACAGCAAGUGUAGAUAGGC	22	oni-mir-3120-1	CUGUCUGUGCCUGCUGUACAGGUUGGAGGAUAUUCUGCACAGCAAGUGUAGAUAGGC	57	GL831264.1(+):903930-903986
oni-miR-33a-3p	CAAUGUGUCUGCAGUGCAGUA	21	oni-mir-33a	GUGCAUUGUAGUUGCAUUGCAUGAUCCUGAAGCCGAGUGCAAUGUGUCUGCAGUGCAGUA	60	CM001447.1(+):7668169-7668228
oni-miR-33a-5p	GUGCAUUGUAGUUGCAUUGCA	21	oni-mir-33a	GUGCAUUGUAGUUGCAUUGCAUGAUCCUGAAGCCGAGUGCAAUGUGUCUGCAGUGCAGUA	60	CM001447.1(+):7668169-7668228
oni-miR-3553	AUGGCCCUAUGGUAAUUCACUG	22	oni-mir-3553-1	AUGGCCCUAUGGUAAUUCACUGAUAGUGUGCUGUGACAGUGAAUUCUACCAGUGCCAUAC	60	CM001450.1(+):43222526-43222585
oni-miR-3553	AUGGCCCUAUGGUAAUUCACUG	22	oni-mir-3553-2	AUGGCCCUAUGGUAAUUCACUGAUAGUGUGCUGUGACAGUGAAUUCUACCAGUGCCAUAC	60	CM001450.1(+):43226399-43226458
oni-miR-3553	AUGGCCCUAUGGUAAUUCACUG	22	oni-mir-3553-3	AUGGCCCUAUGGUAAUUCACUGAUAGUGAGCUCUCACAGUGAAUUCUACCAGUGCCAUAC	60	CM001460.1(+):22508403-22508462
oni-miR-449a	AGGCAGUGUCUUGUUAGCUGGU	22	oni-mir-449a	AGGCAGUGUCUUGUUAGCUGGUAGUUUCUUCCUGUCCCAGCUCACCUGCUGCUGCCCUC	59	CM001455.1(+):25967806-25967864
oni-miR-457	UAGCAGCACAUCAUUACUGGUA	22	oni-mir-457	UAGCAGCACAUCAUUACUGGUAUUUCUUUUCACUGCAUUACCAGUAUGUUAUGUGCUGCUUCA	63	CM001446.1(+):926096-926158
oni-miR-458	AUAGCUCUUUAAAUGGUACUGC	22	oni-mir-458	AGCGCCAUUUUCAGAGCUAUAAGAGUGAAAGUUAUCAUAGCUCUUUAAAUGGUACUGC	58	CM001445.1(-):268936-268993
oni-miR-462	UAACGGAACCCAUAAUGCAGCUG	23	oni-mir-462	UAACGGAACCCAUAAUGCAGCUGUGAUUCUGAGCCCCAGCUGGUUAUGGGGUCCGUUUCCA	61	CM001463.1(-):31139411-31139471
oni-miR-551	GCGACCCAUCCUUUGUUUCUG	21	oni-mir-551	GAAACCAAGUGUGGGUGUGGCCUGAAAAAGAAAUAGGGCGACCCAUCCUUUGUUUCUG	58	CM001457.1(+):7953435-7953492
oni-miR-7	UGGAAGACUAGUGAUUUUGUUGU	23	oni-mir-7-1	UGGAAGACUAGUGAUUUUGUUGUUUUUAGUUAGAGCAACCGACAACAAAUCACAGUCUGCCAAA	64	CM001455.1(+):18531443-18531506
oni-miR-7	UGGAAGACUAGUGAUUUUGUUGU	23	oni-mir-7-4	UGGAAGACUAGUGAUUUUGUUGUUUGUUGUUUUAAAGGACAACAAAUCAUUGUCUCCCUCA	61	CM001454.1(-):32067599-32067659
oni-miR-7	UGGAAGACUAGUGAUUUUGUUGU	23	oni-mir-7-3	UGGAAGACUAGUGAUUUUGUUGUGACGCUGAUCAAAGAACAACAAGUCCCAGUCUGCCUCU	61	CM001461.1(+):7827715-7827775
oni-miR-7	UGGAAGACUAGUGAUUUUGUUGU	23	oni-mir-7-2	UGGAAGACUAGUGAUUUUGUUGUUGUAAAUUCAUGUUUUUGACAACAGAGUCACAGUCUACCUCG	65	CM001450.1(+):6572437-6572501
oni-miR-7132a-3p	UGAGGCGUUUAGAACAAGUUCA	22	oni-mir-7132a	GACUUGGUCAAAGCUCCUCAGCAGAUUGAAGUGACUCUGAGGCGUUUAGAACAAGUUCA	59	CM001449.1(-):21432354-21432412
oni-miR-7132a-5p	GACUUGGUCAAAGCUCCUCAGC	22	oni-mir-7132a	GACUUGGUCAAAGCUCCUCAGCAGAUUGAAGUGACUCUGAGGCGUUUAGAACAAGUUCA	59	CM001449.1(-):21432354-21432412
oni-miR-7132b-3p	UGAGAAGUUUUGAACAAGUAUA	22	oni-mir-7132b	GACUUGGUCCAAGCUCCUCAGUGCUGUUUCCAUACCUGAGAAGUUUUGAACAAGUAUA	58	CM001447.1(-):3347464-3347521
oni-miR-7132b-5p	GACUUGGUCCAAGCUCCUCAGU	22	oni-mir-7132b	GACUUGGUCCAAGCUCCUCAGUGCUGUUUCCAUACCUGAGAAGUUUUGAACAAGUAUA	58	CM001447.1(-):3347464-3347521
oni-miR-7133	GAUGUUGAGUAUCAAACUGUAU	22	oni-mir-7133-4	GAUGUUGAGUAUCAAACUGUAUGUUAUGUAUGCUAUAUAUAGUUUGAUACACAGCACAAUA	61	CM001463.1(+):19558862-19558922
oni-miR-7133	GAUGUUGAGUAUCAAACUGUAU	22	oni-mir-7133-1	GAUGUUGAGUAUCAAACUGUAUGUUAUGUAUGCUAUAUAUAGUUUGAUACACAGCACAAUA	61	AERX01077347.1(+):258-318
oni-miR-7133	GAUGUUGAGUAUCAAACUGUAU	22	oni-mir-7133-2	GAUGUUGAGUAUCAAACUGUAUGUUAUGUAUGCUAUAUAUAGUUUGAUACACAGCACAAUA	61	AERX01077350.1(-):771-831
oni-miR-7133	GAUGUUGAGUAUCAAACUGUAU	22	oni-mir-7133-3	GAUGUUGAGUAUCAAACUGUAUGUUAUGUAUGCUAUAUAUAGUUUGAUACACAGCACAAUA	61	CM001463.1(+):19441028-19441088
oni-miR-7147	UGUACCAUGCUGGUAGCCAGUG	22	oni-mir-7147	UGUACCAUGCUGGUAGCCAGUGUGUGGUAGGCUUUGCUGGUGACCAGCGUUGUGCCUCA	59	CM001452.1(-):14868007-14868065
oni-miR-723a	AGACAUCAGAUAAAUCUGUGCU	22	oni-mir-723a	CGGCAGCUUUGUGUGAUGUGACUUCUGACAUAUCGAAGAAGACAUCAGAUAAAUCUGUGCU	61	CM001447.1(+):24439668-24439728
oni-miR-725	UUCAGUCAUUGUUUCUGGUCGU	22	oni-mir-725	AGCUGGAAACUUUGCCUGGGAAUUUCUGUGCUCAAAAAUUUCAGUCAUUGUUUCUGGUCGU	61	CM001465.1(+):20354859-20354919
oni-miR-726	UUCACUACUAGCAGAACUCAGA	22	oni-mir-726	AUUCCGCUAGUUCUGAACUAUUCGUGUUUGUCAAAAGUUCACUACUAGCAGAACUCAGA	59	CM001448.1(+):9850577-9850635
oni-miR-727b	UCAGUCUUCAGUUCCUCCCAGC	22	oni-mir-727b	UCAGUCUUCAGUUCCUCCCAGCCCAUAACUAUGGCAGCAAUGUGUUGAGGCGAGUUGAAGACU	63	CM001452.1(-):17708419-17708481
oni-miR-728a	AUACUAAGUAUACUACGUUUAC	22	oni-mir-728a	AAAUGUAGUAGACUAUAAGUAUACAUGAAACUCAGAAAGUAUACUAAGUAUACUACGUUUAC	62	GL831264.1(+):1395954-1396015
oni-miR-728b	AAAUGUAGUAGACUUUAAGUAUA	23	oni-mir-728b	AAAUGUAGUAGACUUUAAGUAUACAUGUGGAACUGGGGAGUAUACUAAGUACACUACGUUUAU	63	CM001452.1(-):17704469-17704531
oni-miR-730	UCCUCAUUGUGCAUGCUGUGUG	22	oni-mir-730	UCCUCAUUGUGCAUGCUGUGUGUAUUUCUGUGUGUACCACACAGCGCCUGCAAUGUGGAGG	61	CM001459.1(+):27249589-27249649
oni-miR-731	AAUGACACGUUUUCUCCCGGAUUG	24	oni-mir-731	AAUGACACGUUUUCUCCCGGAUUGCUGCGAGCAGGAAACGCAACCGGGAAUUUCGUGUCAGCC	63	CM001463.1(-):31138896-31138958
oni-miR-734	UAAAUGCUGCAGAAUUGUGCUC	22	oni-mir-734	UGAACUAUUCUGCAACAUUUGUUGAUGUGGUUCUGCAAGUAAAUGCUGCAGAAUUGUGCUC	61	CM001459.1(+):20928896-20928956
oni-miR-736	GUAAGACGAACAAAAAGUUUGU	22	oni-mir-736-1	CAGCUUUUUGUUUGUAUUAUGUUCCUACUAAAAUGUAAGACGAACAAAAAGUUUGU	56	AERX01076622.1(+):1007-1062
oni-miR-736	GUAAGACGAACAAAAAGUUUGU	22	oni-mir-736-2	CAGCUUUUUGUUUGUAUUAUGUUCCUACUAAAAUGUAAGACGAACAAAAAGUUUGU	56	AERX01076625.1(+):1007-1062
oni-miR-7550	AUCCGGCUCGAAGGACCA	18	oni-mir-7550	AUCCGGCUCGAAGGACCAUAAAAUGGAGAGAAUGUUGUCUCCAGGAGUUUAGCUGAUUUA	60	GL831331.1(+):417546-417605
oni-miR-7552	UUACAAUUAAAGGAUAUUUCUC	22	oni-mir-7552	UUACAAUUAAAGGAUAUUUCUCGUGGAUGUAAUAAAAACGGAAAUAUCUCUUAAUUGUUUGGU	63	CM001456.1(+):24965876-24965938
oni-miR-7565	UUCCUGCUGAACUGAGCCAGU	21	oni-mir-7565	UUCCUGCUGAACUGAGCCAGUGAUUCUGUAGGACUGAUUAUCAGCUCAGUAGGCACAG	58	CM001455.1(-):20339764-20339821
oni-miR-8159	UCAGUAACUGGAAUCUGUCCCUGC	24	oni-mir-8159	UCAGUAACUGGAAUCUGUCCCUGCAUGGUAAAAGUGUGCAGGGCCUGGCUGGUUACUGCAC	61	CM001453.1(+):9497705-9497765
oni-miR-8160a	AGAAUAAUGCCAGCAGUCGGCC	22	oni-mir-8160a	AGAAUAAUGCCAGCAGUCGGCCGUGAACUCAGUGUCAGGCCAGUGCUGGUGUUAUUGAGA	60	CM001448.1(+):2011825-2011884
oni-miR-8160b	AGAAUAAUGCCAGCAGUCGGUC	22	oni-mir-8160b	AGAAUAAUGCCAGCAGUCGGUCGUGGUGUCCCAGGGACCAGCACUGGUGUUAUUGAGA	58	CM001463.1(+):20399592-20399649
oni-miR-93	AAAAGUGCUGUUUGUGCAGGUAG	23	oni-mir-93	AAAAGUGCUGUUUGUGCAGGUAGCAGUCAUCCACCUACUGCAAAACCAGCACUUCAGG	58	CM001445.1(+):9821340-9821397
oni-miR-99a	AGACCUGUAGAUACAAGCUUGU	22	oni-mir-99a	AGACCUGUAGAUACAAGCUUGUGGUGUCACUUAACACAAGUUCGGAUCUACGGGUUU	57	CM001457.1(+):402009-402065
oni-miR-9b	UUUCGGUUAUCUAGCUUUAUGA	22	oni-mir-9b-4	UUUCGGUUAUCUAGCUUUAUGAAGAAUGUACAUCACUCAUACAGCUAGAUAACCAAAGAUA	61	CM001454.1(-):23962981-23963041
oni-miR-9b	UUUCGGUUAUCUAGCUUUAUGA	22	oni-mir-9b-3	UUUCGGUUAUCUAGCUUUAUGAAGAAUGUACGUCACUCAUACAGCUAGAUAACCAAAGAUA	61	CM001464.1(-):9233520-9233580
oni-miR-9b	UUUCGGUUAUCUAGCUUUAUGA	22	oni-mir-9b-1	UUUCGGUUAUCUAGCUUUAUGACGAGCAGAACACUCAUACAGCUAGAUAACCAAAGAUA	59	CM001455.1(-):13858579-13858637
oni-miR-9b	UUUCGGUUAUCUAGCUUUAUGA	22	oni-mir-9b-5	UUUCGGUUAUCUAGCUUUAUGAUGCAUGAUUAUCACUCAUACAGCUAGAUAACCAAAGA	59	CM001444.1(+):13557586-13557644
oni-miR-9b	UUUCGGUUAUCUAGCUUUAUGA	22	oni-mir-9b-2	UUUCGGUUAUCUAGCUUUAUGACAGGUAUUUAACACUCAUACAGCUAGAUAACCAAAGA	59	CM001450.1(-):44108523-44108581
ssa-let-7b-3p	CUGUACAACCUACUGCCUUCCC	22	ssa-let-7b-1	UGAGGUAGUAGGUUGUGUGGUUUCAGGGUUGUUAUUUUGCCCCAUCAGGAGUUAACUGUACAACCUACUGCCUUCCC	77	-
ssa-let-7b-3p	CUGUACAACCUACUGCCUUCCC	22	ssa-let-7b-2	UGAGGUAGUAGGUUGUGUGGUUUCAGGGUUGUGAUUUUGCCCCAUCAGGAGUUAACUGUACAACCUACUGCCUUCCC	77	-
ssa-let-7d-5p	UGAGGUAGUUGGUUGUAUGGUU	22	ssa-let-7d-1	UGAGGUAGUUGGUUGUAUGGUUUCACAUAAUAAACAGCCCGGAGAUAACUGUACAACCUUCUAGCUUUCC	70	-
ssa-let-7d-5p	UGAGGUAGUUGGUUGUAUGGUU	22	ssa-let-7d-2	UGAGGUAGUUGGUUGUAUGGUUUCGCAUAAUAAACAGUCCGGAGAUAACUGUACAACCUUCUAGCUUUCC	70	-
ssa-let-7f-5p	UGAGGUAGUAGAUUGUAUUGUU	22	ssa-let-7f	UGAGGUAGUAGAUUGUAUUGUUGUGGGGUAGUGAUUUUACCCUGAUCAGAAGAUAACUAUACAAUCUAUUGCCUUCCC	78	-
ssa-let-7j-3p	CUGUACAACCUACUGUCUUUCU	22	ssa-let-7j	UGAGGUAGUAGGUUGGAUAGUUUUAGGGUCACACCCACACUGGGAGAUAACUGUACAACCUACUGUCUUUCU	72	-
ssa-let-7j-5p	UGAGGUAGUAGGUUGGAUAGUU	22	ssa-let-7j	UGAGGUAGUAGGUUGGAUAGUUUUAGGGUCACACCCACACUGGGAGAUAACUGUACAACCUACUGUCUUUCU	72	-
ssa-miR-100a-5p	AACCCGUAGAUCCGAACUUGUG	22	ssa-mir-100a-1	AACCCGUAGAUCCGAACUUGUGCUAACUGACCUCACAAGCUUGAUUCUAUAGGUCU	56	-
ssa-miR-100a-5p	AACCCGUAGAUCCGAACUUGUG	22	ssa-mir-100a-2	AACCCGUAGAUCCGAACUUGUGUUGUCUGGCCACACAAGCUUGUGUCUAUAGGUAUG	57	-
ssa-miR-106a-5p	UAAAGUGCUUACAGUGCAGGUA	22	ssa-mir-106a-2	UAAAGUGCUUACAGUGCAGGUAAUGGUUAUUCCCUAUAUCUACCGCAAUGUGAGCACUUCUGUC	64	-
ssa-miR-106a-5p	UAAAGUGCUUACAGUGCAGGUA	22	ssa-mir-106a-1	UAAAGUGCUUACAGUGCAGGUAAUGGUUAUGUCCUACCUACCGCAAUGUGAGCACUUCUGUC	62	-
ssa-miR-106b-3p	CCUGCAGUAUGAGCACUUCUUUCA	24	ssa-mir-106b	AAAAGUGCUUACAGUGCAGGUAGUGGCGAUGCCCAGCCUACCUGCAGUAUGAGCACUUCUUUCA	64	-
ssa-miR-106b-5p	AAAAGUGCUUACAGUGCAGGUA	22	ssa-mir-106b	AAAAGUGCUUACAGUGCAGGUAGUGGCGAUGCCCAGCCUACCUGCAGUAUGAGCACUUCUUUCA	64	-
ssa-miR-10a-5p	UACCCUGUAGAUCCGGAUUUGU	22	ssa-mir-10a-2	UACCCUGUAGAUCCGGAUUUGUGUGAACAGACUCACGGUCACAAAUUCAUAUCUAAGGGAGU	62	-
ssa-miR-10a-5p	UACCCUGUAGAUCCGGAUUUGU	22	ssa-mir-10a-1	UACCCUGUAGAUCCGGAUUUGUGUGAACAGACUCACGGUCACAAAUUCGUGUCUAAGGGAGU	62	-
ssa-miR-10b-5p	UACCCUGUAGAACCGAAUUUGU	22	ssa-mir-10b-3	UACCCUGUAGAACCGAAUUUGUGUGAUAAAACAACAGUCACAGAUUCGAUUCUAGGGGAGU	61	-
ssa-miR-10b-5p	UACCCUGUAGAACCGAAUUUGU	22	ssa-mir-10b-4	UACCCUGUAGAACCGAAUUUGUGUUAAUAUAUUACAAUCGCAAGUACGUCUCUACAGGAAUA	62	-
ssa-miR-10b-5p	UACCCUGUAGAACCGAAUUUGU	22	ssa-mir-10b-1	UACCCUGUAGAACCGAAUUUGUGUUAAUAGAUAACAAUCGCAAGUACGUCUCUACAGGAAUA	62	-
ssa-miR-10b-5p	UACCCUGUAGAACCGAAUUUGU	22	ssa-mir-10b-2	UACCCUGUAGAACCGAAUUUGUGUGAUAAAACAAGUCACAGAUUCGAUUCUAGGGGAGU	59	-
ssa-miR-10d-5p	CACCCUGUAGAACCGAAUUUGU	22	ssa-mir-10d-2	CACCCUGUAGAACCGAAUUUGUGUUAACAAUACGCAACCGCAAAUUCGCCUCUACGGGA	59	-
ssa-miR-10d-5p	CACCCUGUAGAACCGAAUUUGU	22	ssa-mir-10d-1	CACCCUGUAGAACCGAAUUUGUGUUUACAAUUAACAACCGCAAAUUCGCCUCUACGGGA	59	-
ssa-miR-125a-5p	UCCCUGAGACCCUAACUUGUGA	22	ssa-mir-125a-1	UCCCUGAGACCCUAACUUGUGACUUUUUCCUGUGAUGUGCACGGGUUGGGUUCUCGGGAGCU	62	-
ssa-miR-125a-5p	UCCCUGAGACCCUAACUUGUGA	22	ssa-mir-125a-2	UCCCUGAGACCCUAACUUGUGAGCUCUCUCCAUGAAAAAUCACGGGUUAGGCUCUUGGGACGC	63	-
ssa-miR-125b-5p	UCCCUGAGACCCUUAACCUGUGA	23	ssa-mir-125b-2	UCCCUGAGACCCUUAACCUGUGAUUACUUCAAGAUCACAGGUGAGGUCCUUGGGAAC	57	-
ssa-miR-125b-5p	UCCCUGAGACCCUUAACCUGUGA	23	ssa-mir-125b-3	UCCCUGAGACCCUUAACCUGUGACUACUUUAAAGGUCACAGGUGAGGACCUUGGGAACA	59	-
ssa-miR-125b-5p	UCCCUGAGACCCUUAACCUGUGA	23	ssa-mir-125b-1	UCCCUGAGACCCUUAACCUGUGAGGUCAUAGUAGGUCACAGGUGAGGUCCUCGGGAA	57	-
ssa-miR-128-1-5p	CGGGGCCGGGACGCUGUCUGAGA	23	ssa-mir-128-1	CGGGGCCGGGACGCUGUCUGAGAGUUCUAUGAUUCUCACAGUGAACCGGUCUCUUU	56	-
ssa-miR-139-5p	UCUACAGUGCAUGUGUCUCCAGU	23	ssa-mir-139-2	UCUACAGUGCAUGUGUCUCCAGUGAAUAUGAGCUACUGGAGAGGCAGUUCUGUGUGAGU	59	-
ssa-miR-139-5p	UCUACAGUGCAUGUGUCUCCAGU	23	ssa-mir-139-1	UCUACAGUGCAUGUGUCUCCAGUGUUUGUGUGCUACUGGAGAUAUGGCUCUGUUGGAAU	59	-
ssa-miR-143-5p	GGUGCAGUGCUGCAUCUCUGGU	22	ssa-mir-143	GGUGCAGUGCUGCAUCUCUGGUCAAUUGGGAGUCUGAGAUGAAGCACUGUAGCUC	55	-
ssa-miR-144-5p	GGAUAUCAUCAUAUACUGUAAGUU	24	ssa-mir-144	GGAUAUCAUCAUAUACUGUAAGUUCGUUAUGGUGACACUACAGUAUAGAUGAUGUAC	57	-
ssa-miR-146a-5p	UGAGAACUGAAUUCCAUAGAUGG	23	ssa-mir-146a-1	UGAGAACUGAAUUCCAUAGAUGGUGGCUACAGGAGAUGUCAUCUAUGGGCUCAGUUCUUCUGG	63	-
ssa-miR-146a-5p	UGAGAACUGAAUUCCAUAGAUGG	23	ssa-mir-146a-2	UGAGAACUGAAUUCCAUAGAUGGUGGCUACUGGAGAUGUCAUCUAUGGGCUCAGUUCUUCUGG	63	-
ssa-miR-146a-5p	UGAGAACUGAAUUCCAUAGAUGG	23	ssa-mir-146a-3	UGAGAACUGAAUUCCAUAGAUGGUAGUUGCUCAGAUAGACAUCUAUGGAUUCAGUUCUUCU	61	-
ssa-miR-146b-5p	UGAGAACUGAAGUCCAUAGAUGG	23	ssa-mir-146b	UGAGAACUGAAGUCCAUAGAUGGUAGUUGCUCAGAUAGACAUCUAUGGACUCAAUUCUUCUU	62	-
ssa-miR-146d-5p	UGAGAACUGAAUUCCAAGGGUU	22	ssa-mir-146d-2	UGAGAACUGAAUUCCAAGGGUUGUAUUUCUGAAGUCAGCCCAUGGGGCUCAGUUCUUAAAC	61	-
ssa-miR-146d-5p	UGAGAACUGAAUUCCAAGGGUU	22	ssa-mir-146d-1	UGAGAACUGAAUUCCAAGGGUUGUAUUUCUGAAGUCAGCCCAUGGAGCUCAGUUCUUAAG	60	-
ssa-miR-148b-3p	UCAGUGCAUUACAGAACUUUAU	22	ssa-mir-148b	AAGUUCGGUGAUACACUUCGACUCUAAUUGUUUGCAGUCAGUGCAUUACAGAACUUUAU	59	-
ssa-miR-152-3p	UCAGUGCAUAACAGAACUUUG	21	ssa-mir-152	CAAGUUCUGUGAUACACUUAGGCUCUGAGUCUGUGGUAGUCAGUGCAUAACAGAACUUUGG	61	-
ssa-miR-152-5p	CAAGUUCUGUGAUACACUUAGGCU	24	ssa-mir-152	CAAGUUCUGUGAUACACUUAGGCUCUGAGUCUGUGGUAGUCAGUGCAUAACAGAACUUUGG	61	-
ssa-miR-155-5p	UUAAUGCUAAUCGUGAUAGGGGU	23	ssa-mir-155-1	UUAAUGCUAAUCGUGAUAGGGGUUCUGUUGUUUAAAAAAAAGACACCUAGCAUGUAAGCAUUAGC	65	-
ssa-miR-155-5p	UUAAUGCUAAUCGUGAUAGGGGU	23	ssa-mir-155-2	UUAAUGCUAAUCGUGAUAGGGGUUCUGUUGUUAAAAAAAAAGACACCUAGCAUGUAAGCAUUAGC	65	-
ssa-miR-15a-5p	CGUAGCAGCACGUCAUGGUUUGU	23	ssa-mir-15a	CGUAGCAGCACGUCAUGGUUUGUAGUGAUAGUAAAGAUGCAGACCAUGAAGAGCUGCUGCU	61	-
ssa-miR-15b-3p	CAAAUCAUUAUGUGCUGCCGCU	22	ssa-mir-15b	UAGCAGCACAUCAUGUUUUGCAGGUAUCUAAAAGCAACUCCAAAUCAUUAUGUGCUGCCGCU	62	-
ssa-miR-15c-3p	CGAAUCAUCAUUUGCUGCUUUA	22	ssa-mir-15c-1	UAGCAGCGCAUCAUGGUUUGAAACAGUGUUGAAAAGAUGCGAAUCAUCAUUUGCUGCUUUA	61	-
ssa-miR-15c-5p	UAGCAGCGCAUCAUGGUUUGA	21	ssa-mir-15c-1	UAGCAGCGCAUCAUGGUUUGAAACAGUGUUGAAAAGAUGCGAAUCAUCAUUUGCUGCUUUA	61	-
ssa-miR-15c-5p	UAGCAGCGCAUCAUGGUUUGA	21	ssa-mir-15c-2	UAGCAGCGCAUCAUGGUUUGAAACAAUGUUGGAAAGGUGCGAACCAUCAUUUGCUGCUUUA	61	-
ssa-miR-15d-3p	CAGGCCGUACUGUGCUGCCGCAGU	24	ssa-mir-15d	UAGCAGCACAGAAUGGUUUGUGGGUUACACAGAGAUGCAGGCCGUACUGUGCUGCCGCAGU	61	-
ssa-miR-16a-5p	UAGCAGCACGUAAAUAUUGGAG	22	ssa-mir-16a-2	UAGCAGCACGUAAAUAUUGGAGUUCACCACUGCUGAAGCCUCCAGUAUUGACGGUGCUGUUGA	63	-
ssa-miR-16a-5p	UAGCAGCACGUAAAUAUUGGAG	22	ssa-mir-16a-1	UAGCAGCACGUAAAUAUUGGAGUUAAAACUACUGCUGAAGCCUCCAGUAUUGUUCGUGCUGCUGA	65	-
ssa-miR-16b-5p	UAGCAGCACGUAAAUAUUGGUG	22	ssa-mir-16b	UAGCAGCACGUAAAUAUUGGUGUGAGAAUAGACCCCAACCCCAAUAUUAGCUGUGCUGCUUC	62	-
ssa-miR-16c-5p	UAGCAGCACGUAAAUAUUGGCG	22	ssa-mir-16c	UAGCAGCACGUAAAUAUUGGCGUGAGAAUACAGACCCCGACCCCAAUAUUAGCUGUGCUGCUUC	64	-
ssa-miR-17-5p	CAAAGUGCUUACAGUGCAGGUAG	23	ssa-mir-17-2	CAAAGUGCUUACAGUGCAGGUAGUCUUCUAAUAUCUACUGCAGUGAAGGCACUUUAAGCA	60	-
ssa-miR-17-5p	CAAAGUGCUUACAGUGCAGGUAG	23	ssa-mir-17-3	CAAAGUGCUUACAGUGCAGGUAGUGUUAUUGAUGAUCUACUGCAGUGGAGGCACUUCUAGC	61	-
ssa-miR-17-5p	CAAAGUGCUUACAGUGCAGGUAG	23	ssa-mir-17-1	CAAAGUGCUUACAGUGCAGGUAGUCAUCUAAUAUCUACUGCAGUGAAGGCACUUUAAGCA	60	-
ssa-miR-181a-4-3p	ACCAUCGACCGUUGAGUGUACC	22	ssa-mir-181a-4	AACAUUCAACGCUGUCGGUGAGUUUGAGCUAAAUUGACAAAAACCAUCGACCGUUGAGUGUACC	64	-
ssa-miR-181a-5p	AACAUUCAACGCUGUCGGUGAGU	23	ssa-mir-181a-1	AACAUUCAACGCUGUCGGUGAGUUUGAGCAUCUGUCCAAAACCAUCGACCGUUAAAUGUACC	62	-
ssa-miR-181a-5p	AACAUUCAACGCUGUCGGUGAGU	23	ssa-mir-181a-4	AACAUUCAACGCUGUCGGUGAGUUUGAGCUAAAUUGACAAAAACCAUCGACCGUUGAGUGUACC	64	-
ssa-miR-181a-5p	AACAUUCAACGCUGUCGGUGAGU	23	ssa-mir-181a-3	AACAUUCAACGCUGUCGGUGAGUUUGAGCCUCUGACAGAAACCAUCGACGGUUGGCUGUACC	62	-
ssa-miR-181a-5p	AACAUUCAACGCUGUCGGUGAGU	23	ssa-mir-181a-5	AACAUUCAACGCUGUCGGUGAGUUUGGUAUGGAUCACAUAAAAACCAUCGACCGUUGACUGUGCC	65	-
ssa-miR-181a-5p	AACAUUCAACGCUGUCGGUGAGU	23	ssa-mir-181a-2	AACAUUCAACGCUGUCGGUGAGUUUGAGCCUCUGACAGAAACCAUCGACCGUUGACUGUACC	62	-
ssa-miR-18a-3p	ACUGCCCUAGUUGCUCCUUCUGGC	24	ssa-mir-18a	UAAGGUGCAUCUAGUGUAGUUAGUGAAAUAGUCUAGUAUCUACUGCCCUAGUUGCUCCUUCUGGC	65	-
ssa-miR-194a-5p	UGUAACAGCAACUCCAUGUGGA	22	ssa-mir-194a-1	UGUAACAGCAACUCCAUGUGGAAGUUGCCUGUGUUCCAGUGGAGAUGCUGUUACCUGC	58	-
ssa-miR-194a-5p	UGUAACAGCAACUCCAUGUGGA	22	ssa-mir-194a-2	UGUAACAGCAACUCCAUGUGGAAGUUGUCUGUGUUCCAGUGGAGAUGCUGUUACCUGC	58	-
ssa-miR-194b-5p	UGUAACAGCAUCUCCAUAUGGA	22	ssa-mir-194b	UGUAACAGCAUCUCCAUAUGGAAUAGCUCAGGGUUCCAGUGGAGCUGCUGUUAUGGG	57	-
ssa-miR-199a-3p	ACAGUAGUCUGCACAUUGGUU	21	ssa-mir-199a-1	CCCAGUGUUCAGACUACCUGUUCAGGGUCUUACUGGUGUACAGUAGUCUGCACAUUGGUU	60	-
ssa-miR-199a-3p	ACAGUAGUCUGCACAUUGGUU	21	ssa-mir-199a-2	CCCAGUGUUCAGACUACCUGUUCAGGAAGUAGUGGUUGCACAGUAGUCUGCACAUUGGUU	60	-
ssa-miR-199a-3p	ACAGUAGUCUGCACAUUGGUU	21	ssa-mir-199a-3	CCCAGUGUUCAGACUACCUGUUCAUUGUCAUACUGGUGUACAGUAGUCUGCACAUUGGUU	60	-
ssa-miR-199a-3p	ACAGUAGUCUGCACAUUGGUU	21	ssa-mir-199a-4	CCCAGUGUUCAGACUACCUGUUCAUCAGGCUGAAGCUGAACAGUAGUCUGCACAUUGGUU	60	-
ssa-miR-199a-5p	CCCAGUGUUCAGACUACCUGUUC	23	ssa-mir-199a-3	CCCAGUGUUCAGACUACCUGUUCAUUGUCAUACUGGUGUACAGUAGUCUGCACAUUGGUU	60	-
ssa-miR-199a-5p	CCCAGUGUUCAGACUACCUGUUC	23	ssa-mir-199a-2	CCCAGUGUUCAGACUACCUGUUCAGGAAGUAGUGGUUGCACAGUAGUCUGCACAUUGGUU	60	-
ssa-miR-199a-5p	CCCAGUGUUCAGACUACCUGUUC	23	ssa-mir-199a-4	CCCAGUGUUCAGACUACCUGUUCAUCAGGCUGAAGCUGAACAGUAGUCUGCACAUUGGUU	60	-
ssa-miR-199a-5p	CCCAGUGUUCAGACUACCUGUUC	23	ssa-mir-199a-1	CCCAGUGUUCAGACUACCUGUUCAGGGUCUUACUGGUGUACAGUAGUCUGCACAUUGGUU	60	-
ssa-miR-19a-3p	UGUGCAAAUCUAUGCAAAACUG	22	ssa-mir-19a-1	AGUUUUGCAUAGUUGCACUACAAGAGAAAUGGAGUUGUGCAAAUCUAUGCAAAACUGA	58	-
ssa-miR-19a-3p	UGUGCAAAUCUAUGCAAAACUG	22	ssa-mir-19a-3	UUUUGCAUAGUUGCAUUACAAGUAAAAAUGAGUUGUGCAAAUCUAUGCAAAACUG	55	-
ssa-miR-19a-3p	UGUGCAAAUCUAUGCAAAACUG	22	ssa-mir-19a-2	AGUUUUGCAUAGUUGCACUACAAGAAAAAUUGAGUUGUGCAAAUCUAUGCAAAACUGU	58	-
ssa-miR-19d-5p	AGCUUUGCGGGGUGGGCAGUCAGC	24	ssa-mir-19d	AGCUUUGCGGGGUGGGCAGUCAGCCUUUUUGUAGGAGCAGCUGUGCAAACCCAAGCAAAACUG	63	-
ssa-miR-203b-3p	UGAAAUGUUUAGGACCACUCG	21	ssa-mir-203b	AGUGGUUCUUGACAGUUCAACAGUCUUUACCAAAAUUGUGAAAUGUUUAGGACCACUCG	59	-
ssa-miR-20a-3-3p	ACUGCAGUGUGAGCACUUGAUGU	23	ssa-mir-20a-3	UAAAGUGCUUAUAGUGCAGGUAGUUCUAUGGCCAUCUACUGCAGUGUGAGCACUUGAUGU	60	-
ssa-miR-20a-5p	UAAAGUGCUUAUAGUGCAGGUAG	23	ssa-mir-20a-3	UAAAGUGCUUAUAGUGCAGGUAGUUCUAUGGCCAUCUACUGCAGUGUGAGCACUUGAUGU	60	-
ssa-miR-20a-5p	UAAAGUGCUUAUAGUGCAGGUAG	23	ssa-mir-20a-1	UAAAGUGCUUAUAGUGCAGGUAGUAUAUUAUCUACAUCUACUGCAAUGUGAGCACUUCCAGU	62	-
ssa-miR-20a-5p	UAAAGUGCUUAUAGUGCAGGUAG	23	ssa-mir-20a-2	UAAAGUGCUUAUAGUGCAGGUAGUUUUAUGGAUACCUACUGCAGUGUGAGCACUUGAAGU	60	-
ssa-miR-20b-3p	ACUGCAGUGUGUGCACUUCAAGU	23	ssa-mir-20b	CAAAGUGCUCACAGUGCAGGUAGUUUAAAUGAACCUACUGCAGUGUGUGCACUUCAAGU	59	-
ssa-miR-210-5p	AGCCACUGACUAACGUACAUUG	22	ssa-mir-210-2	AGCCACUGACUAACGUACAUUGCGCCUAUCCCAAUUCCACUGUGCGUGUGACAGCGGCU	59	-
ssa-miR-210-5p	AGCCACUGACUAACGUACAUUG	22	ssa-mir-210-1	AGCCACUGACUAACGUACAUUGCGCCUAUCCCAAUUCCACCACUGUGCGUGUGACAGCGGCU	62	-
ssa-miR-2187-5p	UUUAAUUAGUAUAGCCUGUAUU	22	ssa-mir-2187	UUUAAUUAGUAUAGCCUGUAUUAGUGAUCACACCAAUUCUUUACAGGCUAUGCUAAUCUAUGC	63	-
ssa-miR-2188-5p	AAGGUCCAACCUCACAUGUCCU	22	ssa-mir-2188	AAGGUCCAACCUCACAUGUCCUGUGUGGCUGAAGGAAGGCUGUGUGAGGUCAGACCUAUC	60	-
ssa-miR-21a-2-3p	CGACAACAGUCUGUAAGCUGUC	22	ssa-mir-21a-2	UAGCUUAUCAGACUGGUGUUGACUGUUUGAAUCACAUGGCGACAACAGUCUGUAAGCUGUC	61	-
ssa-miR-21a-5p	UAGCUUAUCAGACUGGUGUUGACU	24	ssa-mir-21a-1	UAGCUUAUCAGACUGGUGUUGACUGUUUGAAUCACAUGGCGACAACGGUCUGUAAGCUGU	60	-
ssa-miR-21a-5p	UAGCUUAUCAGACUGGUGUUGACU	24	ssa-mir-21a-2	UAGCUUAUCAGACUGGUGUUGACUGUUUGAAUCACAUGGCGACAACAGUCUGUAAGCUGUC	61	-
ssa-miR-222a-5p	UGCUCAGUAGGCAGUGUAGAUCCU	24	ssa-mir-222a-1	UGCUCAGUAGGCAGUGUAGAUCCUGUAUAAUGAUCAGCAGCUACAUCUGGCUACUGGGUCUC	62	-
ssa-miR-222a-5p	UGCUCAGUAGGCAGUGUAGAUCCU	24	ssa-mir-222a-2	UGCUCAGUAGGCAGUGUAGAUCCUGUGUAAUUAUCAGCAGCUACAUCUGGCUACUGGGUCUC	62	-
ssa-miR-23a-5p	GGAUUCCUGGCAGAGUGAUUUG	22	ssa-mir-23a-2	GGAUUCCUGGCAGAGUGAUUUGGUAUUGUGUCAUAAAAUCACAUUGCCAGGGAUUUCC	58	-
ssa-miR-23a-5p	GGAUUCCUGGCAGAGUGAUUUG	22	ssa-mir-23a-1	GGAUUCCUGGCAGAGUGAUUUGAUAUUGUAUCAUAAAAUCACAUUGCCAGGGAUUUCC	58	-
ssa-miR-23b-3p	AUCACAUUGCCAGGGAUUACCACC	24	ssa-mir-23b	GGGUUCCUGGCGUGCUGAUUUGUGACUUAAGAUAAAAUCACAUUGCCAGGGAUUACCACC	60	-
ssa-miR-24a-3-5p	UGCCUACUGAGCUGAUAACAGU	22	ssa-mir-24a-3	UGCCUACUGAGCUGAUAACAGUACUACUGAAUGACUGGCUCAGUUCAGCAGGAAC	55	-
ssa-miR-24b-3p	UGGCUCAGUUCAGCAGAAACCG	22	ssa-mir-24b	UGCCUACUGAGCUGAUAACAGUUUGAUAUAAUGAGCACUGGCUCAGUUCAGCAGAAACCG	60	-
ssa-miR-26a-5p	UUCAAGUAAUCCAGGAUAGGCU	22	ssa-mir-26a-3	UUCAAGUAAUCCAGGAUAGGCUGGUUAACACAUGCACGGCCUGUUCUUGAUUACUUGUUUC	61	-
ssa-miR-26a-5p	UUCAAGUAAUCCAGGAUAGGCU	22	ssa-mir-26a-5	UUCAAGUAAUCCAGGAUAGGCUUGUUUAAGUGGGCACAGCCUAUUCGGGAUGACUUGGUUC	61	-
ssa-miR-26a-5p	UUCAAGUAAUCCAGGAUAGGCU	22	ssa-mir-26a-1	UUCAAGUAAUCCAGGAUAGGCUGGUUCCCGCCAGCACGGCCUAUUCUCGAUUACUUGUUUC	61	-
ssa-miR-26a-5p	UUCAAGUAAUCCAGGAUAGGCU	22	ssa-mir-26a-6	UUCAAGUAAUCCAGGAUAGGCUGUGUGUAUCCUGGUUGGCCUAUUCAUGAUUACUUGUACU	61	-
ssa-miR-26a-5p	UUCAAGUAAUCCAGGAUAGGCU	22	ssa-mir-26a-2	UUCAAGUAAUCCAGGAUAGGCUGGUUUCCACCAGCACGGCCUAUUCUCGAUUACUUGUUUC	61	-
ssa-miR-26a-5p	UUCAAGUAAUCCAGGAUAGGCU	22	ssa-mir-26a-4	UUCAAGUAAUCCAGGAUAGGCUGGUUAACACCUGUACGGCCUAUUCUUGAUUACUUGUUUC	61	-
ssa-miR-26d-5p	UUCAAGUAAUCUAGGAUAGGCU	22	ssa-mir-26d	UUCAAGUAAUCUAGGAUAGGCUUGUUUAAGCAGGGAGAGCCUAUUCGGGAUGACUUGGUUC	61	-
ssa-miR-29a-5p	CUGGUUUCACAUGGUGGUUUAGA	23	ssa-mir-29a	CUGGUUUCACAUGGUGGUUUAGAUUAAUGUUCCCAGUGUCUAGCACCAUUUGAAAUCAGU	60	-
ssa-miR-29c-3p	UAGCACCAUUUGAAAUCAGUUA	22	ssa-mir-29c	ACUGUUUUCUUUUGGUGUUUAGAGUCUCUUCUAUUUCUAGCACCAUUUGAAAUCAGUUA	59	-
ssa-miR-301c-3p	CAGUGCAAUAGUAUUGUCAUGGC	23	ssa-mir-301c	GCUUUGAUGACGUUGCACUACUGUUCCAUCGGCUGAAGCAGUGCAAUAGUAUUGUCAUGGC	61	-
ssa-miR-30a-5p	UGUAAACAUCCUACACUCUCAGC	23	ssa-mir-30a-4	UGUAAACAUCCUACACUCUCAGCUGUGACAUCAUCGAGCUGGGAGAGGGGUGUUUACGCU	60	-
ssa-miR-30a-5p	UGUAAACAUCCUACACUCUCAGC	23	ssa-mir-30a-2	UGUAAACAUCCUACACUCUCAGCGGCGCCCUCUAGUAGCCGGGAGUGGGAUGUUUGCGCU	60	-
ssa-miR-30a-5p	UGUAAACAUCCUACACUCUCAGC	23	ssa-mir-30a-3	UGUAAACAUCCUACACUCUCAGCUGUGACAUCAUCGAGCUGGGAGAGGGGUGUUUACACU	60	-
ssa-miR-30a-5p	UGUAAACAUCCUACACUCUCAGC	23	ssa-mir-30a-1	UGUAAACAUCCUACACUCUCAGCGGUGCCCUCUUUCAGCCGGGAGUGGGAUGUUUGCGCU	60	-
ssa-miR-30d-2-3p	UUUUCAGUCGGAUGUUUGCAGCU	23	ssa-mir-30d-2	UGUAAACAUCCUUGACUGAAAGCUGGUGUUUCAUAUAGGGCUUUUCAGUCGGAUGUUUGCAGCU	64	-
ssa-miR-30d-5p	UGUAAACAUCCUUGACUGAAAGCU	24	ssa-mir-30d-1	UGUAAACAUCCUUGACUGAAAGCUGGUGUUUCAUACAGGGCUUUCAGUCGGAUGUUUGCAGC	62	-
ssa-miR-30d-5p	UGUAAACAUCCUUGACUGAAAGCU	24	ssa-mir-30d-2	UGUAAACAUCCUUGACUGAAAGCUGGUGUUUCAUAUAGGGCUUUUCAGUCGGAUGUUUGCAGCU	64	-
ssa-miR-30e-3p	CUGGGAGAAGGCUGUUUACUUU	22	ssa-mir-30e-2	UGUAAACAUCCUACACUCAGCUGUGAGUUGGAAGCAGAGGCUGGGAGAAGGCUGUUUACUUU	62	-
ssa-miR-30e-3p	CUGGGAGAAGGCUGUUUACUUU	22	ssa-mir-30e-1	UGUAAACAUCCUACACUCAGCUGUGAGUUGGCAGCAGAGGCUGGGAGAAGGCUGUUUACUUU	62	-
ssa-miR-30e-5p	UGUAAACAUCCUACACUCAGCU	22	ssa-mir-30e-1	UGUAAACAUCCUACACUCAGCUGUGAGUUGGCAGCAGAGGCUGGGAGAAGGCUGUUUACUUU	62	-
ssa-miR-30e-5p	UGUAAACAUCCUACACUCAGCU	22	ssa-mir-30e-3	UGUAAACAUCCUACACUCAGCUAUAGCCUGUAUGGAAGGCUGGGGAGAGGGUGUUUACUUU	61	-
ssa-miR-30e-5p	UGUAAACAUCCUACACUCAGCU	22	ssa-mir-30e-2	UGUAAACAUCCUACACUCAGCUGUGAGUUGGAAGCAGAGGCUGGGAGAAGGCUGUUUACUUU	62	-
ssa-miR-462a-5p	UAACGGAACCCAUAAUGCAGCUG	23	ssa-mir-462a	UAACGGAACCCAUAAUGCAGCUGUGUCAAUGAACAGCACCUGGAUGUGGGUUCCGUCU	58	-
ssa-miR-462b-5p	UAACGGAACCCAUAAAGCAGCUG	23	ssa-mir-462b	UAACGGAACCCAUAAAGCAGCUGUGUCUUUCAAAGGCAGCUGGAUGUGAGCUCCGUUUCC	60	-
ssa-miR-7132a-3p	UGAGAAGUUUGGAACAAGUAAA	22	ssa-mir-7132a	GACUUGGUCAAAGCUCCUCAGUGAUGAGUAGAAACCUGAGAAGUUUGGAACAAGUAAA	58	-
ssa-miR-7132a-5p	GACUUGGUCAAAGCUCCUCAGU	22	ssa-mir-7132a	GACUUGGUCAAAGCUCCUCAGUGAUGAGUAGAAACCUGAGAAGUUUGGAACAAGUAAA	58	-
ssa-miR-7132b-3p	UGAGGCGUUUAGAACAAGUUCA	22	ssa-mir-7132b	GACUUGGUCAAAGCUCCUCAGCAGAUGUUUCAGAGAAUCCUGAGGCGUUUAGAACAAGUUCA	62	-
ssa-miR-722-5p	AUUUGAAACGUUUUAGCCAAA	21	ssa-mir-722-2	AUUUGAAACGUUUUAGCCAAAAAUGUUUCCAUGGUAAAGGUGUUUUUUGCAGAAACGUUUCAGAUUU	67	-
ssa-miR-722-5p	AUUUGAAACGUUUUAGCCAAA	21	ssa-mir-722-1	AUUUGAAACGUUUUAGCCAAAAAUGUUUCCACAGUAAAGGUGUUUUUUGCAGAAACGUUUCAGAUUU	67	-
ssa-miR-730a-5p	UCCUCAUUGUGCAUGCUGUGUG	22	ssa-mir-730a-2	UCCUCAUUGUGCAUGCUGUGUGUGUUUCUGAUUAGUCCACACAGUGCCUGCAAUGUGGACG	61	-
ssa-miR-730a-5p	UCCUCAUUGUGCAUGCUGUGUG	22	ssa-mir-730a-1	UCCUCAUUGUGCAUGCUGUGUGUGUUUCUUAUGGGUCCACACAGCGCCUGCAAUGUGGAGG	61	-
ssa-miR-731-3p	CACCGGGAAUUUCGUGUCAGCA	22	ssa-mir-731	AAUGACACGUUUUCUCCCGGAUUGCCAAACACACUAUAAGGCACCGGGAAUUUCGUGUCAGCA	63	-
ssa-miR-731-5p	AAUGACACGUUUUCUCCCGGAUU	23	ssa-mir-731	AAUGACACGUUUUCUCCCGGAUUGCCAAACACACUAUAAGGCACCGGGAAUUUCGUGUCAGCA	63	-
ssa-miR-734-3p	UAAAUGCUGCAGAAUUGUGCUU	22	ssa-mir-734	UGAACUAUUCUGCAACAUUUGUUGAUGUGGUUCUGCUAGUAAAUGCUGCAGAAUUGUGCUU	61	-
ssa-miR-7a-5p	UGGAAGACUAGUGAUUUUGUUGU	23	ssa-mir-7a-1	UGGAAGACUAGUGAUUUUGUUGUUAUGUGUCAAAAUUGACAACAAGUCAUGGUCUACCUCA	61	-
ssa-miR-7a-5p	UGGAAGACUAGUGAUUUUGUUGU	23	ssa-mir-7a-7	UGGAAGACUAGUGAUUUUGUUGUUGUAAAUUUAGCUCACUGACAACAAGUCACAGUCUACCUC	63	-
ssa-miR-7a-5p	UGGAAGACUAGUGAUUUUGUUGU	23	ssa-mir-7a-3	UGGAAGACUAGUGAUUUUGUUGUUUUUAGUUAGAUGAAUCGACAACAAAUCACAGUCUGCCAAA	64	-
ssa-miR-7a-5p	UGGAAGACUAGUGAUUUUGUUGU	23	ssa-mir-7a-4	UGGAAGACUAGUGAUUUUGUUGUUGUAAAUUUAGCUCUCUGACAACAAGUCACAGUCUACCUC	63	-
ssa-miR-7a-5p	UGGAAGACUAGUGAUUUUGUUGU	23	ssa-mir-7a-5	UGGAAGACUAGUGAUUUUGUUGUUGUAAAUUCAGCACCCAGACAACAAGUCAUAGUCUACCUCA	64	-
ssa-miR-7a-5p	UGGAAGACUAGUGAUUUUGUUGU	23	ssa-mir-7a-6	UGGAAGACUAGUGAUUUUGUUGUGAUGCUGAGCAAUGAGAAUAACAACAAGUCCCAGUCUGCCUCU	66	-
ssa-miR-7a-5p	UGGAAGACUAGUGAUUUUGUUGU	23	ssa-mir-7a-2	UGGAAGACUAGUGAUUUUGUUGUGAUGCUGAGCAAUGAGAACAACAAGUCCCAGUCUGCCUCU	63	-
ssa-miR-8157-3p	ACUCUGUGCUCUGCUGUGCUGU	22	ssa-mir-8157	UAGCACAUUACAGUACAGCUGUAUUGUUACUGCACUGUACUCUGUGCUCUGCUGUGCUGU	60	-
ssa-miR-92a-5p	AGGUUGGGAUAGGCAGCAAUGCU	23	ssa-mir-92a-1	AGGUUGGGAUAGGCAGCAAUGCUCAUUACUUGUAUGGUAUUGCACUUGUCCCGGCCUGU	59	-
ssa-miR-92a-5p	AGGUUGGGAUAGGCAGCAAUGCU	23	ssa-mir-92a-2	AGGUUGGGAUAGGCAGCAAUGCUUUUUACUUGUAUGGUAUUGCACUUGUCCCGGCCUGU	59	-
ssa-miR-93a-5p	AAAAGUGCUGUUUGUGCAGGUAG	23	ssa-mir-93a-1	AAAAGUGCUGUUUGUGCAGGUAGAUAAACUCAUCAGACCUACUGCAAAACCAGCACUUCCUG	62	-
ssa-miR-93a-5p	AAAAGUGCUGUUUGUGCAGGUAG	23	ssa-mir-93a-2	AAAAGUGCUGUUUGUGCAGGUAGCUGACUCACCCGCCCUACUGCAAAACCAGCACUUCCCGA	62	-
