# Supplementary material for: Comparative Transcriptomics Reveals the microRNA-Mediated Immune Response of Large Yellow Croaker (Larimichthys crocea) to Pseudomonas plecoglossicida Infection
Source: MDPI journal article supplement (doi:10.3390/fishes8010010), 2022-12-23
Supplement: s1 [file s1 › Table S2.xlsx]

## Sheet: Sheet1
Table S2 Primer used in this study
mRNA/miRNA name	Primer Name	Sequence (5’-3’)	Purpose
lcr-miR-N508	lcr-miR-N508-F	GCGCGTCCTGAACAGAGGC	PCR
	lcr-miR-N508-loop-R	CTCAACTGGTGTCGTGGAGTCGGCAATTCAGTTGAGTGAGACAC	Reverse transcription
lcr-miR-N319	lcr-miR-N319-F	GCGCGGTTCCTGCTGAACT	PCR
	lcr-miR-N319- loop-R	CTCAACTGGTGTCGTGGAGTCGGCAATTCAGTTGAGACTGGCTC	Reverse transcription
lcr-miR-N364	lcr-miR-N364-F	GCGCGATCCCGGACG	PCR
	lcr-miR-N364- loop-R	CTCAACTGGTGTCGTGGAGTCGGCAATTCAGTTGAGTGGGGGCT	Reverse transcription
lcr-miR-N228	lcr-miR-N228-F	GCGCGGACTTGGTCATAGC	RT-qPCR and PCR
	lcr-miR-N228- loop-R	CTCAACTGGTGTCGTGGAGTCGGCAATTCAGTTGAGACTGAGGA	Reverse transcription
lcr-miR-N201	lcr-miR-N201-F	GCGCGGAGAGCCTCC	RT-qPCR
	lcr-miR-N201- loop-R	CTCAACTGGTGTCGTGGAGTCGGCAATTCAGTTGAGTGTCAGAA	Reverse transcription
dre-miR-199-3p	dre-miR-199-3p-F	GCGCGTACAGTAGTCTGCA	RT-qPCR
	dre-miR-199-3p-loop-R	CTCAACTGGTGTCGTGGAGTCGGCAATTCAGTTGAGAACCAAGT	Reverse transcription
U6	XR_003462831.1-F	GCGCGCGGGAACGATACAGAG	RT-qPCR
	Loop-XR_003462831.1-R	CTCAACTGGTGTCGTGGAGTCGGCAATTCAGTTGAG CTAATCTT	Reverse transcription
	Universal miRNA-R	CTCAACTGGTGTCGTGGA	RT-qPCR and PCR
TLR5S	XM_010739929.3-F	CACTTACGGAGTCCATCCTG	RT-qPCR
	XM_010739929.3-R	CAAAGAACATTGAAGGCTGC	RT-qPCR
B3GNT5A	XM_027289965.1-F	CACCACGTAGTCAGCCACAT	RT-qPCR
	XM_027289965.1-R	GGGTGGTTGATGAGGTACGG	RT-qPCR
DNMBP	XM_027289312.1-F	TAAACTCCCATCCCGGCCTA	RT-qPCR
	XM_027289312.1-R	CGGTAGTGGCACCATCTGTT	RT-qPCR
β-actin	XM_027284923.1-F	GCGGACCTGACAGACTACCTCATG	RT-qPCR
	XM_027284923.1-R	GCGAGTTGAAGGTGGTCTCGTGGA	RT-qPCR
