# Supplementary material for: Comparative Transcriptomics Reveals the microRNA-Mediated Immune Response of Large Yellow Croaker (Larimichthys crocea) to Pseudomonas plecoglossicida Infection
Source: MDPI journal article supplement (doi:10.3390/fishes8010010), 2022-12-23
Supplement: s1 [file s1 › Table S4.xlsx]

## Sheet: Table S4
Table S4 Information of DEmiRNA at 12 h
miRNA name	Fold change(PP1/PBS1)	P value	Regulation	PBS1_1	PBS1_2	PBS1_3	PP1_1	PP1_2	PP1_3	PBS1	PP1
oni-miR-734	14.857	0.00224241	up	0.23	1.7	0.51	10.79	21.73	1.04	0.813333	11.1867
oni-miR-2187b	3.254	0.0233762	up	1.47	1.02	0.51	0.84	2.34	5.89	1	3.02333
oni-miR-194b	0.371	0.0209466	down	13	5	10.78	2.01	7.29	0.58	9.59333	3.29333
lcr-miR-N508	1.595	0.0188296	up	1464.44	1765.99	1610.61	2867.56	3990.02	3507.21	1613.68	3454.93
lcr-miR-N501	0.372	0.0164134	down	1821.62	969.56	3930.99	155.85	831.26	1731.41	2240.72	906.173
lcr-miR-N498	0.302	0.0369416	down	892.95	242.39	518.67	280.52	221.67	88.79	551.337	196.993
lcr-miR-N434	0.372	0.0164134	down	1821.62	969.56	3930.99	155.85	831.26	1731.41	2240.72	906.173
lcr-miR-N370	0.166	0.0308852	down	428.62	415.53	136.49	124.68	55.42	0	326.88	60.0333
lcr-miR-N338	1.554	0.0461864	up	2250.24	2458.53	1201.14	1994.83	4821.28	4173.14	1969.97	3663.08
lcr-miR-N312	0.537	2.86e-10	down	85294.9	76526.2	68437.4	56042.1	49986.2	44483.9	76752.8	50170.7
lcr-miR-N308	0.363	0.0077338	down	1000.11	761.8	1528.72	405.2	554.17	443.95	1096.88	467.773
lcr-miR-N275	0.286	0.00825581	down	607.21	1558.23	2047.39	93.51	886.67	621.53	1404.28	533.903
lcr-miR-N229	0.638	0.000329774	down	207844	275771	283359	228096	181879	189079	255658	199684
lcr-miR-N228	0.652	0.000444548	down	207844	275771	283359	228096	181879	189079	255658	199684
lcr-miR-N221	0.461	0.0461594	down	1357.29	831.05	764.36	685.72	554.17	266.37	984.233	502.087
lcr-miR-N216	0.095	0.0214063	down	285.74	138.51	136.49	31.17	55.42	0	186.913	28.8633
lcr-miR-N215	0.111	0.0376819	down	285.74	138.51	136.49	31.17	55.42	0	186.913	28.8633
lcr-miR-N209	5.874	0.0445245	up	107.15	34.63	0	342.86	387.92	221.98	47.26	317.587
lcr-miR-N149	0.195	0.0291186	down	428.62	657.92	136.49	93.51	0	133.19	407.677	75.5667
lcr-miR-N148	0.165	0.0184268	down	428.62	657.92	136.49	93.51	0	133.19	407.677	75.5667
lcr-miR-N83	0.051	0.0089698	down	214.31	173.14	327.58	31.17	0	0	238.343	10.39
lcr-miR-N82	0.051	0.0089698	down	214.31	173.14	327.58	31.17	0	0	238.343	10.39
lcr-miR-N65	0.11	0.0374605	down	178.59	207.76	218.39	31.17	0	44.4	201.58	25.19
lcr-miR-N58	0.42	0.0265867	down	1357.29	831.05	764.36	685.72	554.17	266.37	984.233	502.087
dre-miR-459-5p	0.238	0.0174213	down	3.73	1.02	2.64	0.59	1.04	0	2.46333	0.543333
dre-miR-31	1.797	0.047318	up	8.25	6.81	15.86	12.38	30.05	8.43	10.3067	16.9533
dre-miR-194a	0.236	0.0198632	down	134.74	126.06	100.66	18.32	55.29	4.85	120.487	26.1533
dre-miR-192	0.236	0.0238303	down	190.69	142.65	137.87	22.84	73.51	6	157.07	34.1167
dre-miR-190a	1.592	8.67452e-05	up	163.79	134.24	118.24	201.48	237.57	171.19	138.757	203.413
dre-miR-155	0.619	1.25929e-07	down	3347.79	2606.24	3558.72	1941.51	1700.08	1761.07	3170.92	1800.89
dre-miR-135c	1.763	3.4085e-05	up	26.68	28.96	33.96	48.03	37.86	59.22	29.8667	48.37
dre-let-7i	1.597	5.15171e-05	up	1067.51	970.36	827.2	1186.38	1270.86	1761.53	955.023	1406.26
