# Supplementary material for: Comparative Transcriptomics Reveals the microRNA-Mediated Immune Response of Large Yellow Croaker (Larimichthys crocea) to Pseudomonas plecoglossicida Infection
Source: MDPI journal article supplement (doi:10.3390/fishes8010010), 2022-12-23
Supplement: s1 [file s1 › Table S5.xlsx]

## Sheet: Table S5
Table S5 Information of DEmiRNA at 24 h
miRNA name	Fold change(PP2/PBS2)	P value	Regulation	PBS2_1	PBS2_2	PBS2_3	PP2_1	PP2_2	PP2_3	PBS2	PP2
ssa-miR-7132a-5p	0.657	3.31e-05	down	704.04	629.48	723.92	505.8	400.19	402.88	685.813	436.29
ssa-miR-21a-5p	5.032	2.54e-53	up	82.31	84.61	74.17	388.37	432.72	349.5	80.3633	390.197
oni-miR-8159	2.418	0.000694702	up	29.31	34.23	36.61	35.79	60.92	139.33	33.3833	78.68
oni-miR-734	4.595	0.0012481	up	2.99	2.99	3.21	1.39	21.29	17.79	3.06333	13.49
oni-miR-725	0.132	3.77e-05	down	3.12	3.23	3.96	0.18	0.36	0.81	3.43667	0.45
oni-miR-194b	0.226	0.000577501	down	2.24	13.88	6.04	1.57	1.35	1.98	7.38667	1.63333
ola-miR-181b-3p	2.241	0.0391766	up	1.87	1.32	1.13	2.5	3.86	3.02	1.44	3.12667
lcr-miR-N110	0.034	0.0442048	down	482.2	0	53.34	0	0	0	178.513	0
lcr-miR-N175	0.124	0.000390971	down	85509.9	21026.8	265536	10089.4	9975.57	7449.95	124024	9171.65
lcr-miR-N201	0.025	7.93e-08	down	2973.56	256.87	2827.12	73.92	81.43	41.62	2019.18	65.6567
lcr-miR-N225	0.214	9.2e-05	down	2732.46	844.01	3040.49	443.49	814.33	582.68	2205.65	613.5
lcr-miR-N230	0.124	0.000390971	down	85509.9	21026.8	265536	10089.4	9975.57	7449.95	124024	9171.65
lcr-miR-N246	2.53	0.0371426	up	401.83	110.09	266.71	702.2	610.75	541.06	259.543	618.003
lcr-miR-N388	1.538	0.0369521	up	3295.03	2054.97	2026.99	4139.26	5456.03	4952.76	2459	4849.35
lcr-miR-N394	1.543	0.0365573	up	3094.11	1908.19	2187.02	4028.38	5333.88	4869.52	2396.44	4743.93
lcr-miR-N433	0.245	0.0190148	down	200.92	550.44	1653.6	258.7	325.73	208.1	801.653	264.177
lcr-miR-N443	0.649	0.0164526	down	7594.63	10164.8	9121.46	7539.36	6188.93	8490.45	8960.28	7406.25
lcr-miR-N476	0.644	0.042508	down	21658.8	33943.7	35312.3	21213.7	18892.5	34919.1	30304.9	25008.4
lcr-miR-N487	1.538	0.0369521	up	3295.03	2054.97	2026.99	4139.26	5456.03	4952.76	2459	4849.35
lcr-miR-N507	0.651	0.0457179	down	21658.8	33980.4	35365.7	21509.3	18933.2	34919.1	30334.9	25120.5
dre-miR-9-5p	1.582	0.0064969	up	18.71	13.16	20.76	25.15	28.57	26.28	17.5433	26.6667
dre-miR-9-3p	1.963	0.0199605	up	2.87	2.75	3.77	7.3	5.66	4.65	3.13	5.87
dre-miR-499-5p	0.226	1.1e-09	down	10.1	12.92	15.85	3.14	2.34	3.02	12.9567	2.83333
dre-miR-459-5p	0.013	5.62e-05	down	1	2.15	1.13	0	0	0	1.42667	0
dre-miR-218b	0.661	0.00490835	down	38.54	37.22	36.04	29.96	21.02	20.47	37.2667	23.8167
dre-miR-217	2.133	0.000847103	up	29.43	27.52	34.91	37.73	48.61	104.56	30.62	63.6333
dre-miR-216b	1.909	0.0143611	up	11.22	11.13	12.83	12.67	15.72	37.1	11.7267	21.83
dre-miR-205-5p	0.303	0.00193835	down	5.99	5.27	16.42	3.7	1.26	3.26	9.22667	2.74
dre-miR-196a-5p	1.592	0.0178293	up	7.48	7.54	9.25	11.1	11.95	14.19	8.09	12.4133
dre-miR-194a	0.232	2.9e-08	down	30.06	113.21	52.65	15.9	13.48	14.77	65.3067	14.7167
dre-miR-192	0.211	0.000313335	down	45.77	170.41	53.03	16.37	15.63	23.03	89.7367	18.3433
dre-miR-183-5p	1.596	0.00940003	up	21.33	12.21	15.1	23.39	27.31	24.08	16.2133	24.9267
dre-miR-133a-3p	0.662	0.043968	down	32.68	34.23	52.84	20.44	34.5	21.28	39.9167	25.4067
