# Supplementary material for: Comparative Transcriptomics Reveals the microRNA-Mediated Immune Response of Large Yellow Croaker (Larimichthys crocea) to Pseudomonas plecoglossicida Infection
Source: MDPI journal article supplement (doi:10.3390/fishes8010010), 2022-12-23
Supplement: s1 [file s1 › Table S6.xlsx]

## Sheet: Table S6
Table S6 Overviwer of mRNA expression in all Samples
Transcript_ID	Gene_ID	Gene_name	Gene_description	PBS1_1	PBS1_2	PBS1_3	PBS2_1	PBS2_2	PBS2_3	PP1_1	PP1_2	PP1_3	PP2_1	PP2_2	PP2_3	PBS1	PBS2	PP1	PP2
gene-ATP6	gene-ATP6	ATP6	ATP synthase F0 subunit 6	359.25	368.97	383.62	405.81	386.52	444.72	318.01	344.39	426.28	337.96	317.49	402.41	370.613	412.35	362.893	352.62
gene-ATP8	gene-ATP8	ATP8	ATP synthase F0 subunit 8	1403.29	1592.35	1250.97	1353.66	1433.17	1576.63	1306.88	1273.64	2043.17	1285.34	1177.43	1563.34	1415.54	1454.49	1541.23	1342.04
gene-COX1	gene-COX1	COX1	cytochrome c oxidase subunit I	2351.7	2241.32	2354.62	2336.69	2294.31	2509.14	2415.79	2470.84	2760.83	2330.84	2186.64	2630.4	2315.88	2380.05	2549.15	2382.63
gene-COX2	gene-COX2	COX2	cytochrome c oxidase subunit II	3806.37	4113.86	3852.35	4043.99	3999.32	4273.91	3991.11	3859.14	4429.96	3810.78	3591.16	3731.76	3924.19	4105.74	4093.4	3711.23
gene-COX3	gene-COX3	COX3	cytochrome c oxidase subunit III	1715.74	1802.12	1787.84	1906.57	1825.49	2198.92	1833.84	1823.87	2123.1	1768.98	1592.68	1748.75	1768.57	1976.99	1926.94	1703.47
gene-CYTB	gene-CYTB	CYTB	cytochrome b	570.88	622.88	535.04	594.98	575.52	686.02	545.5	546.98	658.22	535.5	489.42	575.33	576.267	618.84	583.567	533.417
rna-XM_010729122.3	gene-LOC104917629	LOC104917629	peroxisomal membrane protein PMP34	21.67	27.62	35.23	22.45	30.47	19.86	19.66	21.92	22	25.02	27.23	30.5	28.1733	24.26	21.1933	27.5833
rna-XM_010729124.3	gene-LOC104917630	LOC104917630	rho GDP-dissociation inhibitor 1, transcript variant X2	0	0	0	0	0	0	0	0	0	0.08	0.05	0	0	0	0	0.043333
rna-XM_019258335.2	gene-LOC104917630	LOC104917630	rho GDP-dissociation inhibitor 1, transcript variant X1	2.36	1.4	1.93	1.48	1.52	1.68	1.87	1.57	1.46	1.51	1.44	1.37	1.89667	1.56	1.63333	1.44
rna-XM_019274922.2	gene-LOC104917648	LOC104917648	NACHT, LRR and PYD domains-containing protein 3, transcript variant X1	0	0	0	0	0	0	0	0	0	0	0	0	0	0	0	0
rna-XM_019274923.2	gene-LOC104917648	LOC104917648	NACHT, LRR and PYD domains-containing protein 3, transcript variant X2	0.35	0.33	0.18	0.2	0.61	0.31	0.36	0.18	0.09	0.16	0.31	0.1	0.286667	0.373333	0.21	0.19
rna-XM_027285639.1	gene-LOC104917648	LOC104917648	NACHT, LRR and PYD domains-containing protein 3, transcript variant X3	4.14	7.74	5.58	10.22	7.8	3.81	9.32	8.3	10.99	7.52	8.38	6.56	5.82	7.27667	9.53667	7.48667
rna-XM_027277019.1	gene-LOC104917649	LOC104917649	zinc finger protein 239-like	3.23	2.15	3.52	2.79	2.45	2.75	4.24	2.46	3.1	2.57	3.55	3.66	2.96667	2.66333	3.26667	3.26
rna-XM_019262856.2	gene-LOC104917659	LOC104917659	voltage-dependent T-type calcium channel subunit alpha-1H, transcript variant X1	0	0	0	0	0	0	0	0	0	0	0	0	0	0	0	0
rna-XM_019262857.2	gene-LOC104917659	LOC104917659	voltage-dependent T-type calcium channel subunit alpha-1H, transcript variant X3	0.03	0	0	0.01	0	0.03	0.02	0.01	0.06	0	0.01	0	0.01	0.013333	0.03	0.003333
rna-XM_019262858.2	gene-LOC104917659	LOC104917659	voltage-dependent T-type calcium channel subunit alpha-1H, transcript variant X4	0	0	0.03	0	0.03	0	0	0	0	0	0	0	0.01	0.01	0	0
rna-XM_019262859.2	gene-LOC104917659	LOC104917659	voltage-dependent T-type calcium channel subunit alpha-1H, transcript variant X5	0	0	0	0	0	0.01	0	0	0	0.01	0	0	0	0.003333	0	0.003333
rna-XM_027285433.1	gene-LOC104917659	LOC104917659	voltage-dependent T-type calcium channel subunit alpha-1H, transcript variant X2	0	0	0	0	0	0	0	0	0	0	0	0	0	0	0	0
rna-XM_010729171.3	gene-LOC104917660	LOC104917660	opioid growth factor receptor-like protein 1	27.94	22.34	24.32	16	25.11	26.29	26.99	27.03	25.43	25.6	21.78	15.12	24.8667	22.4667	26.4833	20.8333
rna-XM_010729191.3	gene-LOC104917675	LOC104917675	late histone H2B.L4	0	0	0	0	0	0	0	0	0.26	0	0	0	0	0	0.086667	0
rna-XM_019273262.2	gene-LOC104917676	LOC104917676	acid-sensing ion channel 1C, transcript variant X1	0	0	0	0	0	0	0	0	0	0	0	0	0	0	0	0
rna-XM_019273264.2	gene-LOC104917676	LOC104917676	acid-sensing ion channel 1C, transcript variant X2	0	0	0	0	0	0	0	0	0	0	0	0.02	0	0	0	0.006667
rna-XM_019273265.2	gene-LOC104917676	LOC104917676	acid-sensing ion channel 1C, transcript variant X3	0	0	0	0	0	0	0	0	0	0	0	0	0	0	0	0
rna-XM_019273266.2	gene-LOC104917676	LOC104917676	acid-sensing ion channel 1C, transcript variant X4	0.03	0	0.1	0.03	0	0	0.09	0	0	0	0	0	0.043333	0.01	0.03	0
rna-XM_019273267.2	gene-LOC104917676	LOC104917676	acid-sensing ion channel 1C, transcript variant X5	0	0	0.07	0	0	0.09	0.09	0	0	0	0.04	0	0.023333	0.03	0.03	0.013333
rna-XM_019273268.2	gene-LOC104917676	LOC104917676	acid-sensing ion channel 1C, transcript variant X6	0	0.03	0.14	0.06	0	0.06	0.06	0.05	0	0.19	0	0	0.056667	0.04	0.036667	0.063333
rna-XM_019273269.2	gene-LOC104917676	LOC104917676	acid-sensing ion channel 1C, transcript variant X7	0	0	0	0	0	0	0	0	0	0	0	0	0	0	0	0
rna-XM_019273203.2	gene-LOC104917679	LOC104917679	ATP-binding cassette sub-family B member 8, mitochondrial	4.87	4.11	3.47	3.55	4.01	3.14	3.39	3.73	3.73	3.86	4.09	3.99	4.15	3.56667	3.61667	3.98
rna-XM_010729195.3	gene-LOC104917680	LOC104917680	autophagy-related protein 9A, transcript variant X2	0.77	1.05	0.6	1.17	0.84	0.89	1.84	0.6	0.81	1.24	0.71	0.79	0.806667	0.966667	1.08333	0.913333
rna-XM_019273259.2	gene-LOC104917680	LOC104917680	autophagy-related protein 9A, transcript variant X1	0.15	0	0	0	0	0	0	0	1.73	0	0	0	0.05	0	0.576667	0
rna-XM_027288861.1	gene-LOC104917680	LOC104917680	autophagy-related protein 9A, transcript variant X3	0	0	0	0	0	0	0	0	0	0	0	0	0	0	0	0
rna-XM_027281558.1	gene-LOC104917682	LOC104917682	tetraspanin-3	12.02	10.35	11.39	10.36	9.66	12.07	11.16	12.9	10.64	12.56	10.34	9.08	11.2533	10.6967	11.5667	10.66
rna-XM_010729211.3	gene-LOC104917693	LOC104917693	7-alpha-hydroxycholest-4-en-3-one 12-alpha-hydroxylase	3.08	6.59	2.94	2.23	8.65	4.63	5.1	4.48	2.57	5.56	5.63	10.26	4.20333	5.17	4.05	7.15
rna-XM_019267135.2	gene-LOC104917694	LOC104917694	gap junction gamma-1 protein, transcript variant X1	0	0	0	0	0	0	0	0	0	0	0	0	0	0	0	0
rna-XM_019267136.2	gene-LOC104917694	LOC104917694	gap junction gamma-1 protein, transcript variant X4	0	0.03	0	0.03	0	0	0	0	0	0	0	0	0.01	0.01	0	0
rna-XM_019267137.2	gene-LOC104917694	LOC104917694	gap junction gamma-1 protein, transcript variant X3	0	0	0	0	0	0	0	0	0	0	0	0	0	0	0	0
rna-XM_019267138.2	gene-LOC104917694	LOC104917694	gap junction gamma-1 protein, transcript variant X2	0	0	0	0	0	0.02	0	0	0	0	0	0	0	0.006667	0	0
rna-XM_010729215.3	gene-LOC104917696	LOC104917696	myosin light chain 3	0	0	0	0	0	0	0	0	0	0	0	0	0	0	0	0
rna-XM_010729216.3	gene-LOC104917697	LOC104917697	corticotropin-releasing factor receptor 2	0	0	0	0	0	0	0	0	0	0	0	0	0	0	0	0
rna-XM_010729217.3	gene-LOC104917699	LOC104917699	aquaporin FA-CHIP	60.78	71.21	61.97	79.99	52.02	86.68	67.19	65.48	63.04	75.79	67.34	91.03	64.6533	72.8967	65.2367	78.0533
rna-XM_010729218.3	gene-LOC104917700	LOC104917700	aquaporin FA-CHIP	74.7	64.17	61.4	51.33	38.15	65.86	68.69	67.36	75.08	96.85	78.64	40.17	66.7567	51.78	70.3767	71.8867
gene-LOC104917701	gene-LOC104917701	LOC104917701	-	0	0	0	0	0	0	0	0	0	0	0.06	0	0	0	0	0.02
rna-XM_010729229.3	gene-LOC104917709	LOC104917709	epidermal growth factor receptor	2.28	2.36	1.76	2.78	2.87	3.28	2.23	1.86	2.28	2.21	2.71	2.25	2.13333	2.97667	2.12333	2.39
rna-XM_010729230.3	gene-LOC104917710	LOC104917710	matrix metalloproteinase-16, transcript variant X2	0	0	0	0	0	0	0	0.02	0	0.03	0	0	0	0	0.006667	0.01
rna-XM_019267102.2	gene-LOC104917710	LOC104917710	matrix metalloproteinase-16, transcript variant X1	0	0	0	0	0	0	0	0	0	0	0	0	0	0	0	0
rna-XM_010729235.3	gene-LOC104917713	LOC104917713	alanine aminotransferase 2-like, transcript variant X1	0	0	0.08	0.1	0	0	0	0.1	0	0	0	0.17	0.026667	0.033333	0.033333	0.056667
rna-XM_010729237.3	gene-LOC104917713	LOC104917713	alanine aminotransferase 2-like, transcript variant X2	0.26	0.38	0.26	0.11	0.29	0.19	0.44	0	0.16	0.09	0.21	0.14	0.3	0.196667	0.2	0.146667
rna-XM_010729238.3	gene-LOC104917713	LOC104917713	alanine aminotransferase 2-like, transcript variant X3	0	0	0	0	0	0	0	0	0	0	0	0	0	0	0	0
rna-XM_019267100.2	gene-LOC104917714	LOC104917714	afadin- and alpha-actinin-binding protein	4.61	3.34	3.22	5.73	2.5	4.67	4.01	4.27	5.17	3.62	3.79	4.74	3.72333	4.3	4.48333	4.05
rna-XM_019267140.2	gene-LOC104917715	LOC104917715	mucolipin-3, transcript variant X1	0	0	0	0.52	0.31	0	0.39	0.34	0.71	0.23	0.09	0	0	0.276667	0.48	0.106667
rna-XM_019267141.2	gene-LOC104917715	LOC104917715	mucolipin-3, transcript variant X3	0.22	0	0.3	0.15	0.36	0.61	0.2	0.26	0	0.31	0.58	0	0.173333	0.373333	0.153333	0.296667
rna-XM_019267143.2	gene-LOC104917715	LOC104917715	mucolipin-3, transcript variant X4	0	0.27	0	0	0	0	0	0	0	0	0	0	0.09	0	0	0
rna-XM_027272228.1	gene-LOC104917715	LOC104917715	mucolipin-3, transcript variant X2	0.64	0.11	0.26	0	0	0	0	0	0	0	0	0.41	0.336667	0	0	0.136667
rna-XM_010729242.3	gene-LOC104917717	LOC104917717	protein CYR61	11.51	6.27	9.83	9.01	10.08	10.75	11.89	11.56	15.95	9.15	7.39	7.69	9.20333	9.94667	13.1333	8.07667
rna-XM_010729245.3	gene-LOC104917720	LOC104917720	ATP synthase subunit g, mitochondrial	179.49	190.16	161.99	153.86	162.99	148.54	175.76	167.19	189.13	165.38	155.79	170.72	177.213	155.13	177.36	163.963
rna-XM_010729246.3	gene-LOC104917721	LOC104917721	G-protein coupled receptor 54	0	0	0	0	0	0	0	0	0	0	0	0	0	0	0	0
rna-XM_010729250.3	gene-LOC104917724	LOC104917724	von Willebrand factor C domain-containing protein 2-like	0.34	0.29	0.44	0.93	0.61	0.55	0.67	0.98	1.08	0.62	0.58	0.44	0.356667	0.696667	0.91	0.546667
rna-XM_010729252.3	gene-LOC104917726	LOC104917726	protein THEM6-like	1.63	1.32	1.52	2.76	1.3	1.25	1	0.98	1.67	1.1	2.4	1.49	1.49	1.77	1.21667	1.66333
rna-XM_010729253.3	gene-LOC104917727	LOC104917727	protein THEM6	2.43	2.47	2.29	1.89	2.75	2.07	1.76	2.28	2.04	2	1.87	2.6	2.39667	2.23667	2.02667	2.15667
rna-XM_010729254.3	gene-LOC104917728	LOC104917728	E3 ubiquitin/ISG15 ligase TRIM25-like, transcript variant X3	0	0	1.71	0.11	0	2.36	0	0	1.57	4.11	3.84	0	0.57	0.823333	0.523333	2.65
rna-XM_027289410.1	gene-LOC104917728	LOC104917728	E3 ubiquitin/ISG15 ligase TRIM25-like, transcript variant X1	0	0	1.71	0.11	0	2.36	0	0	1.57	4.11	3.84	0	0.57	0.823333	0.523333	2.65
rna-XM_027289413.1	gene-LOC104917728	LOC104917728	E3 ubiquitin/ISG15 ligase TRIM25-like, transcript variant X2	8.13	6.14	3.18	8.19	6.84	3.05	7.94	10.06	5.9	0	0.21	6.05	5.81667	6.02667	7.96667	2.08667
rna-XM_010729255.3	gene-LOC104917729	LOC104917729	E3 ubiquitin/ISG15 ligase TRIM25-like	0.04	0	0.1	0	0.07	0.13	0.07	0.04	0.03	0	0.07	0.03	0.046667	0.066667	0.046667	0.033333
rna-XM_019272196.2	gene-LOC104917731	LOC104917731	elongation factor 1-delta, transcript variant X4	0	0	0	0	0.16	0.42	0	0	0	0	0	0	0	0.193333	0	0
rna-XM_027289352.1	gene-LOC104917731	LOC104917731	elongation factor 1-delta, transcript variant X1	0	0	0	0	0	0	0	0	0	0	0	0	0	0	0	0
rna-XM_027289353.1	gene-LOC104917731	LOC104917731	elongation factor 1-delta, transcript variant X2	0	0	0.08	0	0.12	0	0	0	0	0	0.23	0.14	0.026667	0.04	0	0.123333
rna-XM_027289356.1	gene-LOC104917731	LOC104917731	elongation factor 1-delta, transcript variant X3	0.38	0	0.19	0.23	0.09	0.28	0.18	0.33	0.12	0.23	0	0	0.19	0.2	0.21	0.076667
rna-XM_027289364.1	gene-LOC104917731	LOC104917731	elongation factor 1-delta, transcript variant X5	0.75	1.1	0.54	0	0.42	1.1	0.88	0.96	0.34	0.75	0.07	0.68	0.796667	0.506667	0.726667	0.5
rna-XM_027289369.1	gene-LOC104917731	LOC104917731	elongation factor 1-delta, transcript variant X6	0.4	0	0.13	0	0.34	0	0	0	0	0	0	0	0.176667	0.113333	0	0
rna-XM_027289378.1	gene-LOC104917731	LOC104917731	elongation factor 1-delta, transcript variant X7	0	0	0.51	0	0	0	0.23	0.22	0.23	0	0.81	0.8	0.17	0	0.226667	0.536667
rna-XM_027289383.1	gene-LOC104917731	LOC104917731	elongation factor 1-delta, transcript variant X8	1.46	0	0	0.22	0	0.43	0.25	0.23	1.23	0	0	0.42	0.486667	0.216667	0.57	0.14
rna-XM_027289388.1	gene-LOC104917731	LOC104917731	elongation factor 1-delta, transcript variant X9	64.17	57.33	50.88	58.73	42.55	79.84	54.03	72.69	64.84	63.51	60.68	42.83	57.46	60.3733	63.8533	55.6733
rna-XM_027289398.1	gene-LOC104917731	LOC104917731	elongation factor 1-delta, transcript variant X10	429.6	357.58	360.15	305.32	301.3	326.94	388.05	412.11	415.93	384.53	343.7	307.27	382.443	311.187	405.363	345.167
rna-XM_027289399.1	gene-LOC104917731	LOC104917731	elongation factor 1-delta, transcript variant X11	0	0	0	0	0	0	0.26	0.72	0.25	0	0	0	0	0	0.41	0
rna-XM_027291758.1	gene-LOC104917732	LOC104917732	pituitary adenylate cyclase-activating polypeptide type I receptor, transcript variant X1	0	0	0	0	0	0	0	0	0	0	0	0	0	0	0	0
rna-XM_027291765.1	gene-LOC104917732	LOC104917732	pituitary adenylate cyclase-activating polypeptide type I receptor, transcript variant X2	0	0	0	0	0	0	0	0	0	0	0	0	0	0	0	0
rna-XM_027291770.1	gene-LOC104917732	LOC104917732	pituitary adenylate cyclase-activating polypeptide type I receptor, transcript variant X3	0	0	0	0	0	0.26	0	0	0	0	0	0	0	0.086667	0	0
rna-XM_027291775.1	gene-LOC104917732	LOC104917732	pituitary adenylate cyclase-activating polypeptide type I receptor, transcript variant X4	0	0	0	0	0	0	0	0	0	0	0	0	0	0	0	0
rna-XM_027291784.1	gene-LOC104917732	LOC104917732	pituitary adenylate cyclase-activating polypeptide type I receptor, transcript variant X5	0.47	0.6	0.32	0.34	0.54	0.64	0.45	0.45	0.73	0.36	0.22	0.37	0.463333	0.506667	0.543333	0.316667
rna-XM_010729260.3	gene-LOC104917733	LOC104917733	chemokine XC receptor 1	74.69	92.44	105.82	77.41	116.96	78.83	77.91	99.96	73.29	85.52	92.53	99.77	90.9833	91.0667	83.72	92.6067
rna-XM_010729264.3	gene-LOC104917737	LOC104917737	regulator of G protein signaling 20, transcript variant X1	0	0.03	0	0	0.02	0	0	0.07	0.03	0	0	0.03	0.01	0.006667	0.033333	0.01
rna-XM_010729265.3	gene-LOC104917737	LOC104917737	regulator of G protein signaling 20, transcript variant X3	0.04	0	0	0.02	0	0.03	0.03	0	0	0	0	0	0.013333	0.016667	0.01	0
rna-XM_027290042.1	gene-LOC104917737	LOC104917737	regulator of G protein signaling 20, transcript variant X2	0	0	0	0	0	0	0	0	0	0	0	0	0	0	0	0
rna-XM_010729278.3	gene-LOC104917748	LOC104917748	complement C1q-like protein 3	0	0	0	0	0	0	0	0	0	0	0	0	0	0	0	0
rna-XM_019267101.2	gene-LOC104917749	LOC104917749	guanine nucleotide-binding protein G(I)/G(S)/G(O) subunit gamma-5	230.39	212.84	197.96	200.29	226.19	243.17	200.11	203.98	225.13	219.55	228.19	186.62	213.73	223.217	209.74	211.453
rna-XM_027290428.1	gene-LOC104917750	LOC104917750	outer dense fiber protein 2, transcript variant X1	0.08	0.15	0	0.21	0	0	0	0.06	0.09	0	0	0	0.076667	0.07	0.05	0
rna-XM_027290434.1	gene-LOC104917750	LOC104917750	outer dense fiber protein 2, transcript variant X2	1.15	1.03	0.72	0.78	0.89	1.07	1.1	0.84	0.92	1.06	0.72	0.79	0.966667	0.913333	0.953333	0.856667
rna-XM_027291371.1	gene-LOC104917752	LOC104917752	uncharacterized LOC104917752	19.95	28.37	23.45	16.85	26.68	26.41	20.61	19.49	18.84	25.72	23.28	22.88	23.9233	23.3133	19.6467	23.96
rna-XM_027288117.1	gene-LOC104917753	LOC104917753	pituitary adenylate cyclase-activating polypeptide type I receptor	0	0	0	0	0	0	0	0	0	0	0	0	0	0	0	0
rna-XM_019272210.2	gene-LOC104917754	LOC104917754	FYVE and coiled-coil domain-containing protein 1, transcript variant X2	4.2	3.73	3.94	2.85	4.1	2.54	1.03	2.03	2.88	3.27	3.68	3.1	3.95667	3.16333	1.98	3.35
rna-XM_027290493.1	gene-LOC104917754	LOC104917754	FYVE and coiled-coil domain-containing protein 1, transcript variant X1	0	0	0	0	0.82	0.02	0.92	0	0	0	0	0	0	0.28	0.306667	0
rna-XM_027290496.1	gene-LOC104917754	LOC104917754	FYVE and coiled-coil domain-containing protein 1, transcript variant X3	0.46	0.32	1.52	1.2	0.34	1.06	1.25	1.3	0.64	0.94	1.28	0.69	0.766667	0.866667	1.06333	0.97
rna-XM_019272146.2	gene-LOC104917755	LOC104917755	chemokine XC receptor 1, transcript variant X2	10.24	16.91	15.5	15.4	16.31	15.8	15.17	8.42	17.04	9.03	9	14.35	14.2167	15.8367	13.5433	10.7933
rna-XM_027291346.1	gene-LOC104917755	LOC104917755	chemokine XC receptor 1, transcript variant X1	0	0.24	0	0	0.55	0	0	0	0	0	0.59	0	0.08	0.183333	0	0.196667
rna-XM_019272144.2	gene-LOC104917757	LOC104917757	calcium/calmodulin-dependent 3',5'-cyclic nucleotide phosphodiesterase 1C, transcript variant X2	0	0	0	0	0	0	0	0	0	0	0	0	0	0	0	0
rna-XM_019272145.2	gene-LOC104917757	LOC104917757	calcium/calmodulin-dependent 3',5'-cyclic nucleotide phosphodiesterase 1C, transcript variant X4	0.1	0.2	0.28	0.36	0	0.53	0.19	0.27	0.34	0.5	0.11	0.09	0.193333	0.296667	0.266667	0.233333
rna-XM_027291016.1	gene-LOC104917757	LOC104917757	calcium/calmodulin-dependent 3',5'-cyclic nucleotide phosphodiesterase 1C, transcript variant X1	0	0	0	0	0	0	0	0	0	0	0	0.23	0	0	0	0.076667
rna-XM_027291017.1	gene-LOC104917757	LOC104917757	calcium/calmodulin-dependent 3',5'-cyclic nucleotide phosphodiesterase 1C, transcript variant X3	0.27	0.2	0	0.13	0.17	0	0.11	0	0.25	0	0.24	0	0.156667	0.1	0.12	0.08
rna-XM_027291024.1	gene-LOC104917757	LOC104917757	calcium/calmodulin-dependent 3',5'-cyclic nucleotide phosphodiesterase 1C, transcript variant X5	0.1	0	0	0	0.22	0.11	0	0	0.18	0.09	0	0	0.033333	0.11	0.06	0.03
rna-XM_027288219.1	gene-LOC104917759	LOC104917759	delta-type opioid receptor-like	0.03	0	0	0	0	0	0	0	0	0	0	0	0.01	0	0	0
rna-XM_010729301.3	gene-LOC104917763	LOC104917763	cytochrome P450 4V2	0.39	0.31	0.08	0.22	0.05	0.27	0.03	0	0.05	0.28	0.05	0.12	0.26	0.18	0.026667	0.15
rna-XM_010729300.3	gene-LOC104917766	LOC104917766	prostaglandin E2 receptor EP3 subtype	4.71	4.1	3.24	3.38	3.57	5.67	4.53	3.85	3.6	5.64	3.8	3.66	4.01667	4.20667	3.99333	4.36667
rna-XM_019254995.2	gene-LOC104917769	LOC104917769	vitellogenin	0	0	0	0	0	0	0	0	0	0	0	0	0	0	0	0
rna-XM_010729352.3	gene-LOC104917774	LOC104917774	proline-serine-threonine phosphatase-interacting protein 1, transcript variant X1	10.66	8.7	9.7	13.73	15.19	11.4	12.94	14.67	10.51	15.26	22.71	17.33	9.68667	13.44	12.7067	18.4333
rna-XM_010729431.3	gene-LOC104917774	LOC104917774	proline-serine-threonine phosphatase-interacting protein 1, transcript variant X2	0.26	4.58	2.96	3.39	3.21	5.26	1.89	2.22	3.81	4.23	5.66	2.49	2.6	3.95333	2.64	4.12667
rna-XM_010729327.3	gene-LOC104917784	LOC104917784	heat shock 70 kDa protein 4	15.8	16.74	17.41	13.26	16.48	14.02	13.66	15.41	13.38	13.77	13.57	20.77	16.65	14.5867	14.15	16.0367
rna-XM_027273928.1	gene-LOC104917787	LOC104917787	septin-8-A	3.07	4.15	1.54	2.09	2.43	3.37	1.71	3.83	2.97	2.19	3.54	2.61	2.92	2.63	2.83667	2.78
rna-XM_027273632.1	gene-LOC104917789	LOC104917789	gamma-aminobutyric acid receptor subunit alpha-1, transcript variant X1	0	0	0	0	0	0	0	0	0	0	0	0	0	0	0	0
rna-XM_027273633.1	gene-LOC104917789	LOC104917789	gamma-aminobutyric acid receptor subunit alpha-1, transcript variant X2	0	0	0	0	0	0	0	0	0	0	0	0	0	0	0	0
rna-XM_027273634.1	gene-LOC104917789	LOC104917789	gamma-aminobutyric acid receptor subunit alpha-1, transcript variant X3	0	0	0	0	0	0	0	0	0	0	0	0	0	0	0	0
rna-XM_027273635.1	gene-LOC104917789	LOC104917789	gamma-aminobutyric acid receptor subunit alpha-1, transcript variant X4	0	0	0	0	0	0	0	0	0	0	0	0	0	0	0	0
rna-XM_027273636.1	gene-LOC104917789	LOC104917789	gamma-aminobutyric acid receptor subunit alpha-1, transcript variant X5	0	0	0	0	0	0	0	0	0	0	0	0	0	0	0	0
rna-XM_027273637.1	gene-LOC104917789	LOC104917789	gamma-aminobutyric acid receptor subunit alpha-1, transcript variant X6	0	0	0	0	0	0	0	0	0	0	0	0	0	0	0	0
rna-XM_010729337.3	gene-LOC104917790	LOC104917790	gamma-aminobutyric acid receptor subunit beta-2	0	0	0	0	0	0	0	0	0	0	0	0	0	0	0	0
rna-XM_010729344.3	gene-LOC104917794	LOC104917794	dihydropyrimidinase-related protein 3, transcript variant X1	6.42	6.48	4.51	8.2	10.75	11.68	7.7	10.27	10.47	10.84	10.25	9.63	5.80333	10.21	9.48	10.24
rna-XM_027273577.1	gene-LOC104917794	LOC104917794	dihydropyrimidinase-related protein 3, transcript variant X2	1.52	1.22	3.12	3.09	1.54	2.84	3.36	1.65	2.08	1.65	2.27	0.91	1.95333	2.49	2.36333	1.61
rna-XM_010729346.3	gene-LOC104917795	LOC104917795	janus kinase and microtubule-interacting protein 2	0.05	0.02	0	0	0.02	0	0.02	0	0.06	0	0.02	0	0.023333	0.006667	0.026667	0.006667
rna-XM_019265296.2	gene-LOC104917797	LOC104917797	phosphomannomutase 2, transcript variant X2	2.64	3.43	5.27	2.14	2.75	0	1.68	0.79	4.71	0.76	1.16	3.75	3.78	1.63	2.39333	1.89
rna-XM_027282757.1	gene-LOC104917797	LOC104917797	phosphomannomutase 2, transcript variant X1	2.65	8.03	4.15	2.8	6.04	5.65	3.75	4.07	0.46	4.55	3.59	4.2	4.94333	4.83	2.76	4.11333
rna-XM_010729355.3	gene-LOC104917798	LOC104917798	myotubularin-related protein 7, transcript variant X1	1.37	2.55	2.2	1.44	2.55	2.99	2.54	3.57	2.46	1.92	2.29	1.66	2.04	2.32667	2.85667	1.95667
rna-XM_019265282.2	gene-LOC104917798	LOC104917798	myotubularin-related protein 7, transcript variant X2	0	0	0	0	0	0	0	0	0	0	0	0	0	0	0	0
rna-XM_010729359.3	gene-LOC104917801	LOC104917801	docking protein 1	0	0.05	0	0.02	0	0.05	0	0.03	0.05	0.03	0.05	0	0.016667	0.023333	0.026667	0.026667
rna-XM_027283590.1	gene-LOC104917802	LOC104917802	neuronal membrane glycoprotein M6-a	0.03	0.04	0.01	0	0.03	0	0.03	0	0.03	0.02	0.07	0	0.026667	0.01	0.02	0.03
rna-XM_010729362.3	gene-LOC104917803	LOC104917803	NADH dehydrogenase [ubiquinone] iron-sulfur protein 8, mitochondrial, transcript variant X1	50.8	48.88	47.49	46.91	48.28	42.93	47.1	45.55	44.15	47.89	47.85	50.83	49.0567	46.04	45.6	48.8567
rna-XM_027283566.1	gene-LOC104917803	LOC104917803	NADH dehydrogenase [ubiquinone] iron-sulfur protein 8, mitochondrial, transcript variant X2	0	0.28	0	0.34	0.32	0.31	0	0	0	0.27	1.02	0	0.093333	0.323333	0	0.43
rna-XM_010729364.2	gene-LOC104917805	LOC104917805	poly(U)-specific endoribonuclease-B	0	0	0	0	0	0	0	0	0	0	0	0	0	0	0	0
rna-XM_010729365.3	gene-LOC104917806	LOC104917806	protein Shroom1, transcript variant X1	0	0	0.03	0	0.17	0	0	0	0	0	0.12	0	0.01	0.056667	0	0.04
rna-XM_019259659.2	gene-LOC104917806	LOC104917806	protein Shroom1, transcript variant X2	0	0	0.22	0	0.1	0.35	0	0.3	0.18	0	0.38	0.24	0.073333	0.15	0.16	0.206667
rna-XM_019259660.2	gene-LOC104917806	LOC104917806	protein Shroom1, transcript variant X4	0.9	0.34	0.35	0.43	0.28	0.29	0.51	0.17	0.76	0.64	0.13	0	0.53	0.333333	0.48	0.256667
rna-XM_027273594.1	gene-LOC104917806	LOC104917806	protein Shroom1, transcript variant X3	0	0.28	0.2	0.27	0	0	0.37	0.32	0	0.15	0	0.5	0.16	0.09	0.23	0.216667
rna-XM_010729366.3	gene-LOC104917807	LOC104917807	ankyrin repeat domain-containing protein SOWAHA	0	0.02	0.02	0	0	0.03	0.02	0	0.02	0	0	0.03	0.013333	0.01	0.013333	0.01
rna-XM_019266947.2	gene-LOC104917808	LOC104917808	cyclin-I, transcript variant X1	0.97	1.26	1.4	2.12	0.66	1.56	1.52	1.44	4.36	1.57	3.44	2.25	1.21	1.44667	2.44	2.42
rna-XM_027273927.1	gene-LOC104917808	LOC104917808	cyclin-I, transcript variant X2	10.98	8.29	9.08	9.08	7.73	8.94	10.77	9.65	9.59	9.85	6.76	7.26	9.45	8.58333	10.0033	7.95667
rna-XM_019264587.2	gene-LOC104917809	LOC104917809	gamma-aminobutyric acid receptor subunit alpha-6, transcript variant X1	0	0	0	0	0	0	0	0	0	0	0	0	0	0	0	0
rna-XR_003461492.1	gene-LOC104917809	LOC104917809	gamma-aminobutyric acid receptor subunit alpha-6, transcript variant X2	0	0	0	0	0	0	0	0	0	0	0	0	0	0	0	0
rna-XM_019264553.2	gene-LOC104917810	LOC104917810	leukocyte cell-derived chemotaxin-2	0	0	0	0	0	0	0	0	0	0	0	0	0	0	0	0
rna-XM_027277034.1	gene-LOC104917814	LOC104917814	cingulin-like protein 1	1.38	3.72	1.84	1.63	3.33	4.02	4.71	3.35	3.4	3.11	3.91	1.53	2.31333	2.99333	3.82	2.85
rna-XM_010729376.3	gene-LOC104917817	LOC104917817	serpin A3-5	0	0	0	0	0	0	0	0.04	0.03	0.04	0	0.07	0	0	0.023333	0.036667
rna-XM_010729383.3	gene-LOC104917822	LOC104917822	cytochrome P450 1A1, transcript variant X1	0	0	0	0	0	0	0	0	0	0	0	0	0	0	0	0
rna-XM_027274576.1	gene-LOC104917822	LOC104917822	cytochrome P450 1A1, transcript variant X2	0	0	0	0	0	0	0	0	0	0	0	0	0	0	0	0
rna-XM_019272290.2	gene-LOC104917825	LOC104917825	zinc finger protein 710, transcript variant X3	1.55	0.97	0.7	1.15	0	0	1.59	0.56	1.49	0.82	1.78	1.63	1.07333	0.383333	1.21333	1.41
rna-XM_019272291.2	gene-LOC104917825	LOC104917825	zinc finger protein 710, transcript variant X4	0.55	0.64	0.52	1.17	0.97	0.9	0.43	0.74	0.83	0.51	0.93	0.72	0.57	1.01333	0.666667	0.72
rna-XM_027272646.1	gene-LOC104917825	LOC104917825	zinc finger protein 710, transcript variant X1	0	0	0	0	0	0	0	0	0	0	0	0	0	0	0	0
rna-XM_027272647.1	gene-LOC104917825	LOC104917825	zinc finger protein 710, transcript variant X2	0	0	0	0	0	0	0	0	0	0	0	0	0	0	0	0
rna-XM_027272648.1	gene-LOC104917825	LOC104917825	zinc finger protein 710, transcript variant X5	0	0	0	0	0	0	0	0	0	0	0	0	0	0	0	0
rna-XM_027272649.1	gene-LOC104917825	LOC104917825	zinc finger protein 710, transcript variant X6	0	0	0	0	0	0	0	0	0	0	0	0	0	0	0	0
rna-XM_010729390.3	gene-LOC104917826	LOC104917826	lecithin retinol acyltransferase-like	0	0.05	0.1	0.05	0.05	0	0	0	0	0	0	0.09	0.05	0.033333	0	0.03
rna-XM_010729387.3	gene-LOC104917827	LOC104917827	isocitrate dehydrogenase [NADP], mitochondrial	75.07	79.75	76.08	76.14	73.24	67.92	74.8	70.14	80.47	78	72.76	73.95	76.9667	72.4333	75.1367	74.9033
rna-XM_010729388.3	gene-LOC104917828	LOC104917828	retinol dehydrogenase 13, transcript variant X1	8.67	7.79	7.97	7.31	6.78	7.51	9.91	7.83	8.82	8.19	7.54	7.71	8.14333	7.2	8.85333	7.81333
rna-XM_027272652.1	gene-LOC104917828	LOC104917828	retinol dehydrogenase 13, transcript variant X2	0	0	0	0	0	0.51	0	0	0	0	0	0.15	0	0.17	0	0.05
rna-XM_027273099.1	gene-LOC104917832	LOC104917832	mucosa-associated lymphoid tissue lymphoma translocation protein 1	36.27	38.28	37.11	42.54	53.28	50.07	43.39	45	39.82	40.78	47.99	41.33	37.22	48.63	42.7367	43.3667
rna-XM_010729395.3	gene-LOC104917833	LOC104917833	sodium/nucleoside cotransporter 2	0.06	0.43	0.25	0.1	0.03	0.79	0.13	0.26	0.1	0.14	0.41	0.02	0.246667	0.306667	0.163333	0.19
rna-XM_010729397.3	gene-LOC104917835	LOC104917835	cholesterol 25-hydroxylase-like protein 1, member 1	0.24	0.67	0.84	0	0.07	1.81	0	0.23	0.55	1.2	0.53	0	0.583333	0.626667	0.26	0.576667
rna-XM_010729398.3	gene-LOC104917837	LOC104917837	Hypothetical protein	3.57	4.21	4.03	3.43	4.15	3.56	4.82	3.75	4.36	4.14	4.2	4.12	3.93667	3.71333	4.31	4.15333
rna-XM_010729412.3	gene-LOC104917848	LOC104917848	tropomyosin alpha-1 chain, transcript variant X3	4.39	7.46	7.72	17.18	5.77	17.57	8.56	11.78	14.02	15.87	13.38	6.6	6.52333	13.5067	11.4533	11.95
rna-XM_010729413.3	gene-LOC104917848	LOC104917848	tropomyosin alpha-1 chain, transcript variant X5	198.5	191.71	192.43	207.24	195.93	317.19	193.43	238.08	277.54	242.39	233.65	179.62	194.213	240.12	236.35	218.553
rna-XM_010729415.3	gene-LOC104917848	LOC104917848	tropomyosin alpha-1 chain, transcript variant X9	0	6.32	1.97	1.36	5.38	0	5.07	6.53	0.29	3.25	1.94	2.63	2.76333	2.24667	3.96333	2.60667
rna-XM_019272287.2	gene-LOC104917848	LOC104917848	tropomyosin alpha-1 chain, transcript variant X1	3.35	2.25	2.78	2.07	1.98	2.04	3.43	3.32	3.05	2.47	2.36	2.62	2.79333	2.03	3.26667	2.48333
rna-XM_019272288.2	gene-LOC104917848	LOC104917848	tropomyosin alpha-1 chain, transcript variant X2	2.6	0	0.09	3.22	3.45	0	0.23	3.65	0.07	1.6	0.9	4.61	0.896667	2.22333	1.31667	2.37
rna-XM_019272289.2	gene-LOC104917848	LOC104917848	tropomyosin alpha-1 chain, transcript variant X8	2.09	0	0.01	0	0.24	1.56	0	0	2.65	0	0	0	0.7	0.6	0.883333	0
rna-XM_027272695.1	gene-LOC104917848	LOC104917848	tropomyosin alpha-1 chain, transcript variant X4	0	0	0	0	0	0	0	0	0	0	0	0	0	0	0	0
rna-XM_027272696.1	gene-LOC104917848	LOC104917848	tropomyosin alpha-1 chain, transcript variant X6	2.77	9	3.01	0	3.64	2.86	2.05	3.7	1.59	4.21	0	2.82	4.92667	2.16667	2.44667	2.34333
rna-XM_027272697.1	gene-LOC104917848	LOC104917848	tropomyosin alpha-1 chain, transcript variant X7	24.98	23.37	21.31	20	16.49	27.95	23.23	30.38	24.15	32.4	26.59	13.91	23.22	21.48	25.92	24.3
rna-XM_027272698.1	gene-LOC104917848	LOC104917848	tropomyosin alpha-1 chain, transcript variant X10	0	2.71	2.02	0.6	0	3.93	2.59	0	2.11	1.14	2.66	0	1.57667	1.51	1.56667	1.26667
rna-XM_027272699.1	gene-LOC104917848	LOC104917848	tropomyosin alpha-1 chain, transcript variant X11	79.16	71.02	62.81	60.01	59.55	63.41	56.67	63.47	77.55	67.94	75.07	61.51	70.9967	60.99	65.8967	68.1733
rna-XM_027272700.1	gene-LOC104917848	LOC104917848	tropomyosin alpha-1 chain, transcript variant X12	0	0	0	0.41	0	0	0	0	0	0.2	0	0	0	0.136667	0	0.066667
rna-XM_010729417.3	gene-LOC104917850	LOC104917850	C2 calcium-dependent domain-containing protein 4C	0.05	0.05	0.05	0	0	0.09	0.05	0.05	0.13	0	0.05	0	0.05	0.03	0.076667	0.016667
rna-XM_010729420.3	gene-LOC104917853	LOC104917853	annexin A2	29.1	37.92	33.7	64.39	63.95	48.7	40.96	34.81	37.39	66.18	79.88	47.52	33.5733	59.0133	37.72	64.5267
rna-XM_010729428.3	gene-LOC104917857	LOC104917857	Krueppel-like factor 13	10.35	7.99	11.4	7.88	9.26	13.77	9.66	8.45	13.54	8.81	8.1	7.5	9.91333	10.3033	10.55	8.13667
rna-XM_019262623.2	gene-LOC104917858	LOC104917858	transient receptor potential cation channel subfamily M member 1-like	0.13	0.04	0.16	0.03	0.11	0.12	0.08	0.11	0.02	0.1	0.06	0.1	0.11	0.086667	0.07	0.086667
rna-XM_010729430.3	gene-LOC104917859	LOC104917859	dnaJ homolog subfamily A member 4	10.03	9.61	10.96	6.3	7.21	4.3	7.44	8.17	6.68	6.53	5.87	11.37	10.2	5.93667	7.43	7.92333
rna-XM_010729432.3	gene-LOC104917860	LOC104917860	isocitrate dehydrogenase [NAD] subunit alpha, mitochondrial, transcript variant X2	10.88	9.36	9.9	8.59	7.73	9.89	8.47	12.99	11.51	13.43	10.17	10.08	10.0467	8.73667	10.99	11.2267
rna-XM_019262620.2	gene-LOC104917860	LOC104917860	isocitrate dehydrogenase [NAD] subunit alpha, mitochondrial, transcript variant X1	3.57	0	2.19	1.51	1.15	0	0.12	0.17	0	2.71	0	0.36	1.92	0.886667	0.096667	1.02333
rna-XM_010729437.3	gene-LOC104917865	LOC104917865	dual specificity protein phosphatase 26	0.15	0.04	0	0.04	0	0.08	0.04	0	0.08	0	0	0.08	0.063333	0.04	0.04	0.026667
rna-XM_010729440.3	gene-LOC104917867	LOC104917867	hypothetical protein	1.74	1.81	2.09	2.1	2.14	1.78	2.47	2.31	1.62	1.15	1.87	1.04	1.88	2.00667	2.13333	1.35333
rna-XM_027277694.1	gene-LOC104917868	LOC104917868	transient receptor potential cation channel subfamily M member 6	0	0	0	0	0	0	0	0	0	0	0	0	0	0	0	0
rna-XM_027276006.1	gene-LOC104917869	LOC104917869	dynein regulatory complex subunit 2, transcript variant X1	0	0	0	0	0	0	0	0	0	0	0	0	0	0	0	0
rna-XM_027276009.1	gene-LOC104917869	LOC104917869	dynein regulatory complex subunit 2, transcript variant X2	0	0	0	0	0	0	0.03	0	0	0	0	0	0	0	0.01	0
rna-XM_027278226.1	gene-LOC104917870	LOC104917870	transmembrane channel-like protein 2-B	0	0	0	0	0	0	0	0	0	0	0	0	0	0	0	0
rna-XM_027278437.1	gene-LOC104917871	LOC104917871	transmembrane channel-like protein 1	0	0.02	0	0	0	0	0	0	0.02	0	0	0	0.006667	0	0.006667	0
rna-XM_019272303.2	gene-LOC104917873	LOC104917873	ras-specific guanine nucleotide-releasing factor 1	0	0	0.01	0	0	0.02	0	0.02	0	0	0	0	0.003333	0.006667	0.006667	0
rna-XM_010729447.3	gene-LOC104917875	LOC104917875	titin homolog, transcript variant X4	0.15	0	0.13	0.15	0.15	0	0.27	0	0	0	0.3	0.14	0.093333	0.1	0.09	0.146667
rna-XM_019272300.2	gene-LOC104917875	LOC104917875	titin homolog, transcript variant X1	0	0	0	0	0	0	0	0	0	0	0	0	0	0	0	0
rna-XM_019272301.2	gene-LOC104917875	LOC104917875	titin homolog, transcript variant X2	0	0	0	0	0.16	0	0	0	0	0	0	0	0	0.053333	0	0
rna-XM_019272302.2	gene-LOC104917875	LOC104917875	titin homolog, transcript variant X3	0	0.22	0	0.25	0	0.68	0	0.2	0.38	0.22	0	0	0.073333	0.31	0.193333	0.073333
rna-XM_010729449.3	gene-LOC104917877	LOC104917877	cholesterol 25-hydroxylase-like protein 1, member 2	0.21	0.28	0	0	0	0	0.28	0	0	0	0	0	0.163333	0	0.093333	0
rna-XM_027273028.1	gene-LOC104917878	LOC104917878	beta-1,3-galactosyl-O-glycosyl-glycoprotein beta-1,6-N-acetylglucosaminyltransferase 3	0	0	0	0	0	0.05	0	0	0	0	0	0	0	0.016667	0	0
rna-XM_019262645.2	gene-LOC104917879	LOC104917879	proprotein convertase subtilisin/kexin type 5, transcript variant X2	0	0	0	0	0	0	0.07	0	0	0.02	0	0.02	0	0	0.023333	0.013333
rna-XM_027272538.1	gene-LOC104917879	LOC104917879	proprotein convertase subtilisin/kexin type 5, transcript variant X1	0	0	0	0	0	0	0	0	0	0	0	0	0	0	0	0
rna-XM_027272539.1	gene-LOC104917879	LOC104917879	proprotein convertase subtilisin/kexin type 5, transcript variant X3	0.02	0.06	0	0	0	0.02	0	0.04	0.05	0	0	0	0.026667	0.006667	0.03	0
rna-XM_010729453.3	gene-LOC104917880	LOC104917880	OTU domain-containing protein 7A, transcript variant X1	7.22	4.54	5.24	5.19	3.83	3.34	4.04	3.93	5.18	4.01	4.07	4.34	5.66667	4.12	4.38333	4.14
rna-XM_027272922.1	gene-LOC104917880	LOC104917880	OTU domain-containing protein 7A, transcript variant X2	0	0	0	0	0	0.24	0	0.23	0.07	0	0	0.07	0	0.08	0.1	0.023333
rna-XM_027272923.1	gene-LOC104917880	LOC104917880	OTU domain-containing protein 7A, transcript variant X3	0	0	0	0	0	0	0	0	0	0	0	0	0	0	0	0
rna-XM_027272924.1	gene-LOC104917880	LOC104917880	OTU domain-containing protein 7A, transcript variant X4	0	0	0	0	0	0	0.4	0	0	0	0	0	0	0	0.133333	0
rna-XM_019262625.2	gene-LOC104917883	LOC104917883	40S ribosomal protein S27-like	74.64	66.57	76.31	70.83	63.78	70.78	69.87	67.31	82.48	85.08	67.48	61.31	72.5067	68.4633	73.22	71.29
rna-XM_010729471.3	gene-LOC104917894	LOC104917894	uncharacterized LOC104917894, transcript variant X1	29.81	26.43	19.01	49.92	53.09	52.74	36.83	30.69	47.49	55.01	41.5	50.1	25.0833	51.9167	38.3367	48.87
rna-XR_003463054.1	gene-LOC104917894	LOC104917894	uncharacterized LOC104917894, transcript variant X2	5.41	0	6.87	0	3.85	0	0	3.93	0	0	29.25	0	4.09333	1.28333	1.31	9.75
rna-XM_010729486.3	gene-LOC104917904	LOC104917904	nephronectin	0	0	0	0.04	0	0.11	0.04	0	0	0.04	0	0.17	0	0.05	0.013333	0.07
rna-XM_019256053.2	gene-LOC104917905	LOC104917905	interleukin-15, transcript variant X1	12.22	12.44	10.91	11.31	11.09	11.99	11.04	12.31	10.55	14.32	8.83	11.22	11.8567	11.4633	11.3	11.4567
rna-XM_027282886.1	gene-LOC104917905	LOC104917905	interleukin-15, transcript variant X2	0	1.33	1.18	2.54	3.02	0.44	0	0.13	1.05	0	1.25	1.98	0.836667	2	0.393333	1.07667
rna-XM_010729489.3	gene-LOC104917906	LOC104917906	eukaryotic translation initiation factor 4E-1A	4.76	6.01	4.22	3.34	5.31	3.62	5.05	5.04	6.15	4.7	4.24	4.02	4.99667	4.09	5.41333	4.32
rna-XM_010729490.3	gene-LOC104917907	LOC104917907	alcohol dehydrogenase class-3	90.99	82.96	83.89	79.53	71.1	80.44	91.46	90.84	102.4	94.45	77.81	63.43	85.9467	77.0233	94.9	78.5633
rna-XM_019263197.2	gene-LOC104917909	LOC104917909	alcohol dehydrogenase class-3, transcript variant X1	5.14	4	5.25	7.24	4.52	5.24	4.04	3.72	8.47	4.95	4.9	5.07	4.79667	5.66667	5.41	4.97333
rna-XM_019263198.2	gene-LOC104917909	LOC104917909	alcohol dehydrogenase class-3, transcript variant X2	0.13	0.52	0.33	0.41	0	0	0.86	0.14	0.1	0.55	0	0	0.326667	0.136667	0.366667	0.183333
rna-XM_010729496.3	gene-LOC104917912	LOC104917912	neuronal membrane glycoprotein M6-a	0.21	0.04	0.02	0.04	0.06	0.02	0.09	0.08	0.21	0.08	0.08	0.05	0.09	0.04	0.126667	0.07
rna-XM_010729545.3	gene-LOC104917923	LOC104917923	insulin gene enhancer protein ISL-3, transcript variant X1	0	0	0	0	0	0	0	0	0	0	0.02	0	0	0	0	0.006667
rna-XM_010729622.3	gene-LOC104917923	LOC104917923	insulin gene enhancer protein ISL-3, transcript variant X2	0	0	0	0	0	0	0	0	0	0	0	0	0	0	0	0
rna-XM_010729702.3	gene-LOC104917923	LOC104917923	insulin gene enhancer protein ISL-3, transcript variant X3	0	0	0	0	0	0	0	0	0	0	0	0	0	0	0	0
rna-XM_010729780.3	gene-LOC104917923	LOC104917923	insulin gene enhancer protein ISL-3, transcript variant X4	0	0	0	0	0	0.02	0	0	0	0	0	0	0	0.006667	0	0
rna-XM_019278879.2	gene-LOC104917923	LOC104917923	insulin gene enhancer protein ISL-3, transcript variant X5	0	0	0	0	0	0	0	0	0	0	0	0	0	0	0	0
rna-XM_027280200.1	gene-LOC104917924	LOC104917924	ankyrin repeat and SOCS box protein 5, transcript variant X1	0	0	0	0	0.12	0	0.11	0	0.02	0	0	0	0	0.04	0.043333	0
rna-XM_027280237.1	gene-LOC104917924	LOC104917924	ankyrin repeat and SOCS box protein 5, transcript variant X2	0	0.09	0	0	0	0	0	0	0	0	0.03	0	0.03	0	0	0.01
rna-XM_027280268.1	gene-LOC104917924	LOC104917924	ankyrin repeat and SOCS box protein 5, transcript variant X3	0.12	0	0.07	0.15	0	0.09	0	0	0	0.21	0.05	0.12	0.063333	0.08	0	0.126667
rna-XM_019256312.2	gene-LOC104917925	LOC104917925	teneurin-3, transcript variant X2	0	0	0	0	0	0	0	0	0	0	0	0	0	0	0	0
rna-XM_027279740.1	gene-LOC104917925	LOC104917925	teneurin-3, transcript variant X1	0	0	0	0	0	0	0	0	0	0	0	0	0	0	0	0
rna-XM_027279748.1	gene-LOC104917925	LOC104917925	teneurin-3, transcript variant X3	0.01	0.02	0.01	0	0.01	0.03	0.01	0.02	0.01	0.02	0	0.02	0.013333	0.013333	0.013333	0.013333
rna-XM_027272416.1	gene-LOC104917930	LOC104917930	store-operated calcium entry regulator STIMATE	5.01	4.21	3.3	4.01	4.28	6.33	4.61	4.04	6.15	6.15	4.71	3.11	4.17333	4.87333	4.93333	4.65667
rna-XM_027279418.1	gene-LOC104917933	LOC104917933	ephrin type-B receptor 2, transcript variant X1	0	0	0	0	0	0	0	0	0	0	0	0	0	0	0	0
rna-XM_027279419.1	gene-LOC104917933	LOC104917933	ephrin type-B receptor 2, transcript variant X2	0	0	0	0	0	0	0	0	0	0	0	0	0	0	0	0
rna-XM_027279420.1	gene-LOC104917933	LOC104917933	ephrin type-B receptor 2, transcript variant X3	0	0	0	0	0	0	0	0	0	0	0	0	0	0	0	0
rna-XM_027279421.1	gene-LOC104917933	LOC104917933	ephrin type-B receptor 2, transcript variant X4	0.01	0	0.01	0.05	0	0.04	0.02	0.01	0.01	0.01	0.02	0	0.006667	0.03	0.013333	0.01
rna-XM_010729528.3	gene-LOC104917940	LOC104917940	60S ribosomal protein L22	1453.77	1343.3	1296.89	1247.06	1178.18	1416.36	1424.65	1500.95	1471.82	1324.9	1267.35	1024.81	1364.65	1280.53	1465.81	1205.69
rna-XM_019254943.2	gene-LOC104917948	LOC104917948	tribbles homolog 2, transcript variant X2	2.24	1.61	1.22	4.78	4.26	6.2	6.26	1.91	2.05	4.01	2.45	1.8	1.69	5.08	3.40667	2.75333
rna-XM_027279161.1	gene-LOC104917948	LOC104917948	tribbles homolog 2, transcript variant X1	6.21	6.71	9.09	7.37	10.03	7.84	3.78	5.9	6.74	6.09	7.24	9.82	7.33667	8.41333	5.47333	7.71667
rna-XM_027279162.1	gene-LOC104917948	LOC104917948	tribbles homolog 2, transcript variant X3	0	0.78	0.38	0	0.47	0	0	1.93	1.16	0.34	2.67	1.33	0.386667	0.156667	1.03	1.44667
rna-XM_010729537.3	gene-LOC104917949	LOC104917949	purine nucleoside phosphorylase, transcript variant X1	0	0	0	0	0	0.25	0.1	0	0	0	0.11	0	0	0.083333	0.033333	0.036667
rna-XM_019254906.2	gene-LOC104917949	LOC104917949	purine nucleoside phosphorylase, transcript variant X2	0	0	0	0	0	0	0	0.18	0	0	0	0	0	0	0.06	0
rna-XM_027279655.1	gene-LOC104917951	LOC104917951	lysine-specific demethylase 6B, transcript variant X1	0	0	0	0	0	0	0.11	0	0	0	0	0	0	0	0.036667	0
rna-XM_027279656.1	gene-LOC104917951	LOC104917951	lysine-specific demethylase 6B, transcript variant X2	0	0	0	0	0	0	0	0	0	0	0	0	0	0	0	0
rna-XM_019254940.2	gene-LOC104917954	LOC104917954	rho guanine nucleotide exchange factor 10-like protein, transcript variant X1	0	0.68	0.1	0	0.21	0.16	0	0	0	0	0	0.34	0.26	0.123333	0	0.113333
rna-XM_019254941.2	gene-LOC104917954	LOC104917954	rho guanine nucleotide exchange factor 10-like protein, transcript variant X2	1.02	0.53	1.2	1.67	1.13	2.25	1.54	1.55	1.68	1.75	1.37	0.97	0.916667	1.68333	1.59	1.36333
rna-XR_003463028.1	gene-LOC104917957	LOC104917957	uncharacterized LOC104917957, transcript variant X1	0	0	0	0.29	0.3	0	0	0.16	0	0.16	0.32	0.28	0	0.196667	0.053333	0.253333
rna-XR_003463029.1	gene-LOC104917957	LOC104917957	uncharacterized LOC104917957, transcript variant X2	0	0	0	0	0	0	0	0	0	0	0	0	0	0	0	0
rna-XR_003463030.1	gene-LOC104917957	LOC104917957	uncharacterized LOC104917957, transcript variant X3	0	0	0	0	0	0	0	0	0	0	0	0	0	0	0	0
rna-XR_003463031.1	gene-LOC104917957	LOC104917957	uncharacterized LOC104917957, transcript variant X4	0	0	0	0	0	0	0.15	0	0	0	0	0	0	0	0.05	0
rna-XM_010729563.3	gene-LOC104917970	LOC104917970	beta,beta-carotene 9',10'-oxygenase	0.22	0.15	0.04	0.16	0.13	0.13	0.07	0.14	0.05	0.12	0.21	0.16	0.136667	0.14	0.086667	0.163333
rna-XM_027291587.1	gene-LOC104917974	LOC104917974	NADH-ubiquinone oxidoreductase 75 kDa subunit, mitochondrial	29	28.68	29.02	33.95	33.17	29.13	32.21	30	27.26	31.05	32.34	33.16	28.9	32.0833	29.8233	32.1833
rna-XM_027291612.1	gene-LOC104917976	LOC104917976	inosine-uridine preferring nucleoside hydrolase, transcript variant X1	1.6	2.31	1.22	0.26	0.95	0.87	1.29	1.38	1.72	0.92	0.78	0.24	1.71	0.693333	1.46333	0.646667
rna-XM_027291613.1	gene-LOC104917976	LOC104917976	inosine-uridine preferring nucleoside hydrolase, transcript variant X2	2.97	3.64	1	4.16	2.25	2.57	3.3	1.68	3.37	7.42	5.53	4.68	2.53667	2.99333	2.78333	5.87667
rna-XM_027291614.1	gene-LOC104917976	LOC104917976	inosine-uridine preferring nucleoside hydrolase, transcript variant X3	1.57	0.39	0.97	1.53	0	1.59	0	1	0	0	1.04	1.78	0.976667	1.04	0.333333	0.94
rna-XM_027291615.1	gene-LOC104917976	LOC104917976	inosine-uridine preferring nucleoside hydrolase, transcript variant X4	0	0	0	0	0	0	0	0	0	0	0	0	0	0	0	0
rna-XM_019258791.2	gene-LOC104917984	LOC104917984	ras-related and estrogen-regulated growth inhibitor	0.1	0	0.12	0.07	0.04	0.09	0.2	0.09	0.02	0.14	0.07	0.04	0.073333	0.066667	0.103333	0.083333
rna-XM_027291610.1	gene-LOC104917985	LOC104917985	inosine-uridine preferring nucleoside hydrolase	0.35	0.92	0.42	0.4	0.5	1.26	0.82	0.59	0.56	0.56	0.66	0.08	0.563333	0.72	0.656667	0.433333
rna-XM_010729578.3	gene-LOC104917987	LOC104917987	ensconsin, transcript variant X1	0	0	0	0	0	0	0	0	0	0	0	0	0	0	0	0
rna-XM_010729579.3	gene-LOC104917987	LOC104917987	ensconsin, transcript variant X3	1.56	1.01	0.67	1.73	1.01	1.06	1.3	0.59	1.3	1.44	1.03	1.27	1.08	1.26667	1.06333	1.24667
rna-XM_010729580.3	gene-LOC104917987	LOC104917987	ensconsin, transcript variant X4	2.27	1.81	1.83	2.83	1.9	3.33	2.67	1.9	1.72	1.61	1.92	2.61	1.97	2.68667	2.09667	2.04667
rna-XM_010729581.3	gene-LOC104917987	LOC104917987	ensconsin, transcript variant X6	0	0	0.36	0.25	0	0	0	0	0.31	0.32	0.73	0	0.12	0.083333	0.103333	0.35
rna-XM_010729582.3	gene-LOC104917987	LOC104917987	ensconsin, transcript variant X7	1.66	1.51	1.55	1.3	1.76	1.98	1.56	1.66	1.92	2.4	1.31	1.4	1.57333	1.68	1.71333	1.70333
rna-XM_010729583.3	gene-LOC104917987	LOC104917987	ensconsin, transcript variant X8	0	0	0	0	0	0	0	0	0	0	0	0	0	0	0	0
rna-XM_010729584.3	gene-LOC104917987	LOC104917987	ensconsin, transcript variant X9	0	1.09	0.45	0.57	0.88	0.39	0	0.7	0.34	0.35	0.7	0.33	0.513333	0.613333	0.346667	0.46
rna-XM_010729585.3	gene-LOC104917987	LOC104917987	ensconsin, transcript variant X10	0.75	0.45	0	0	0	0.19	0	0	0.42	0	0	0.39	0.4	0.063333	0.14	0.13
rna-XM_019278397.2	gene-LOC104917987	LOC104917987	ensconsin, transcript variant X2	0.25	0.21	0	0	0	0.13	0	0	0	0	0	0	0.153333	0.043333	0	0
rna-XM_019278399.2	gene-LOC104917987	LOC104917987	ensconsin, transcript variant X11	0	0	0	0	0.47	0.7	0	0	0.42	0	0.17	0.35	0	0.39	0.14	0.173333
rna-XM_027282224.1	gene-LOC104917987	LOC104917987	ensconsin, transcript variant X5	0	0	0	0	0	0	0	0	0	0	0	0	0	0	0	0
rna-XM_027282249.1	gene-LOC104917987	LOC104917987	ensconsin, transcript variant X12	3.12	1.21	2.35	1.78	2.01	1.15	1.98	1.57	1.62	1.26	2.8	1.39	2.22667	1.64667	1.72333	1.81667
rna-XM_027282252.1	gene-LOC104917987	LOC104917987	ensconsin, transcript variant X13	1.04	1.73	1.24	1.06	1.11	1.26	0.82	1.35	1.5	1.93	0	1.29	1.33667	1.14333	1.22333	1.07333
rna-XM_010729587.3	gene-LOC104917989	LOC104917989	transcription cofactor vestigial-like protein 1	0	0	0	0	0	0	0	0	0	0	0	0	0	0	0	0
rna-XM_010729589.3	gene-LOC104917990	LOC104917990	tumor necrosis factor ligand superfamily member 6, transcript variant X1	7.51	5.94	8.25	7.59	7.43	7.46	10.66	9.01	8.33	7.89	10.39	6.35	7.23333	7.49333	9.33333	8.21
rna-XM_010729590.3	gene-LOC104917990	LOC104917990	tumor necrosis factor ligand superfamily member 6, transcript variant X2	2.51	2.33	4.26	3.57	2.27	2.19	3.96	5.99	3.86	4.97	4.57	3.24	3.03333	2.67667	4.60333	4.26
rna-XM_027281949.1	gene-LOC104917993	LOC104917993	transmembrane 9 superfamily member 2, transcript variant X1	0.41	0.28	0.27	0.78	1.44	0.24	0	0.26	0.12	0.51	0.25	0.91	0.32	0.82	0.126667	0.556667
rna-XM_027281952.1	gene-LOC104917993	LOC104917993	transmembrane 9 superfamily member 2, transcript variant X2	44.46	42.99	45.61	44.14	46.36	44.23	43.87	43.28	41.46	46.91	49.78	44.61	44.3533	44.91	42.87	47.1
rna-XM_010729600.3	gene-LOC104917996	LOC104917996	zinc finger protein ZIC 1	0	0	0	0	0	0.03	0	0	0	0.03	0	0	0	0.01	0	0.01
rna-XM_010729602.3	gene-LOC104917997	LOC104917997	egl nine homolog 2	6.62	6.39	6.04	9.14	9.06	8.68	7.63	5.75	6.46	5.02	7.97	4.82	6.35	8.96	6.61333	5.93667
rna-XM_010729609.3	gene-LOC104918003	LOC104918003	G-protein coupled receptor 4	14.54	13.76	15.19	16.09	17.99	12.81	11.67	10.96	11.86	9.21	11.9	11.14	14.4967	15.63	11.4967	10.75
rna-XM_010729611.3	gene-LOC104918004	LOC104918004	retinoblastoma-like protein 2, transcript variant X1	25.26	27.53	23.42	23.02	26.05	23.94	26.58	29.74	24.73	24.39	24.45	21.39	25.4033	24.3367	27.0167	23.41
rna-XM_019274292.2	gene-LOC104918004	LOC104918004	retinoblastoma-like protein 2, transcript variant X2	2.06	0.53	3.7	1.86	1.79	2.71	0.65	1.34	1.15	2.49	1.47	1.69	2.09667	2.12	1.04667	1.88333
rna-XM_010729610.3	gene-LOC104918005	LOC104918005	interferon-induced very large GTPase 1	0.16	0.14	0.3	0.03	0.07	0.12	0.07	0.05	0.11	0.12	0.04	0.16	0.2	0.073333	0.076667	0.106667
rna-XM_010729612.3	gene-LOC104918006	LOC104918006	FXYD domain-containing ion transport regulator 6-like	0.12	0.32	0.11	0.14	0.24	0.27	0.07	0.22	0.13	0.21	0.18	0.35	0.183333	0.216667	0.14	0.246667
rna-XM_019274270.2	gene-LOC104918007	LOC104918007	transmembrane protease serine 13	0.15	0.35	0.85	0.18	0.56	0.26	0.23	0.17	0.19	0.33	0.21	0.48	0.45	0.333333	0.196667	0.34
rna-XM_010729616.3	gene-LOC104918008	LOC104918008	uncharacterized LOC104918008, transcript variant X1	63.92	82.85	70.99	68.41	86.6	74.3	60.14	72.16	65.75	58.11	70.62	66.03	72.5867	76.4367	66.0167	64.92
rna-XM_027280927.1	gene-LOC104918008	LOC104918008	uncharacterized LOC104918008, transcript variant X2	0.3	0.79	1.88	0.75	1.71	0.29	2.12	1.07	1.21	0	0	0.67	0.99	0.916667	1.46667	0.223333
rna-XM_010729617.3	gene-LOC104918009	LOC104918009	transmembrane protease serine 4, transcript variant X2	0	0	0	0.12	0	0	0	0	0	0	0	0	0	0.04	0	0
rna-XM_010729618.3	gene-LOC104918009	LOC104918009	transmembrane protease serine 4, transcript variant X3	0	0	0.39	0	0	0.3	0	0	0	0.52	0	0	0.13	0.1	0	0.173333
rna-XM_010729619.3	gene-LOC104918009	LOC104918009	transmembrane protease serine 4, transcript variant X4	0	0	1.13	0	0	0.42	0	0	0	0.41	0	0	0.376667	0.14	0	0.136667
rna-XM_027280280.1	gene-LOC104918009	LOC104918009	transmembrane protease serine 4, transcript variant X1	3.87	3.7	1.13	2.07	3.55	2.1	1.63	3.82	2.79	1.07	2.26	1.68	2.9	2.57333	2.74667	1.67
rna-XM_010729626.3	gene-LOC104918014	LOC104918014	myeloid leukemia factor 1, transcript variant X2	0.08	0	0	0	0	0	0	0	0	0	0	0	0.026667	0	0	0
rna-XM_027280212.1	gene-LOC104918014	LOC104918014	myeloid leukemia factor 1, transcript variant X1	0	0	0	0	0	0	0	0	0	0	0	0	0	0	0	0
rna-XM_027280213.1	gene-LOC104918014	LOC104918014	myeloid leukemia factor 1, transcript variant X3	0	0.08	0	0	0	0	0.39	0	0.07	0	0	0.07	0.026667	0	0.153333	0.023333
rna-XM_010729629.3	gene-LOC104918016	LOC104918016	serine/threonine-protein phosphatase 2A 65 kDa regulatory subunit A beta isoform	0	0	0	0	0	0	0.01	0	0.02	0	0	0	0	0	0.01	0
rna-XM_010729631.3	gene-LOC104918018	LOC104918018	chondrolectin	3.16	2.48	2.4	3.47	3	5	3.07	2.88	2.88	4.25	3.33	2.39	2.68	3.82333	2.94333	3.32333
rna-XM_010729632.3	gene-LOC104918020	LOC104918020	Apolipoprotein A-IV	0	0	0.05	0	0	0	0	0	0	0.05	0	0	0.016667	0	0	0.016667
rna-XM_010729637.3	gene-LOC104918024	LOC104918024	uncharacterized LOC104918024, transcript variant X1	8.57	7.47	9.49	11.64	7.32	6.13	10.17	12.06	8.13	9.96	6.11	7.45	8.51	8.36333	10.12	7.84
rna-XM_019257423.2	gene-LOC104918024	LOC104918024	uncharacterized LOC104918024, transcript variant X2	0.93	0.66	1.99	1.72	0	0	1.35	0.99	0	0.9	0	1.89	1.19333	0.573333	0.78	0.93
rna-XM_010729641.3	gene-LOC104918027	LOC104918027	hepatocyte cell adhesion molecule	0	0	0	0	0	0	0	0	0	0.03	0	0.03	0	0	0	0.02
rna-XM_010729642.3	gene-LOC104918028	LOC104918028	high affinity cGMP-specific 3',5'-cyclic phosphodiesterase 9A, transcript variant X1	0	0	0	0	0	0	0	0	0	0	0	0	0	0	0	0
rna-XM_010729643.3	gene-LOC104918028	LOC104918028	high affinity cGMP-specific 3',5'-cyclic phosphodiesterase 9A, transcript variant X2	0	0	0	0	0	0	0	0	0	0	0	0	0	0	0	0
rna-XM_019257426.2	gene-LOC104918028	LOC104918028	high affinity cGMP-specific 3',5'-cyclic phosphodiesterase 9A, transcript variant X3	0	0	0	0	0	0	0	0	0	0	0	0	0	0	0	0
rna-XM_010729645.3	gene-LOC104918031	LOC104918031	transmembrane protein 136, transcript variant X1	0	0	0	0	0	0	0	0	0	0	0	0	0	0	0	0
rna-XM_010729646.3	gene-LOC104918031	LOC104918031	transmembrane protein 136, transcript variant X2	0	0	0	0	0	0	0	0	0	0	0	0	0	0	0	0
rna-XM_019257425.2	gene-LOC104918031	LOC104918031	transmembrane protein 136, transcript variant X3	0	0	0	0	0	0	0.04	0	0	0	0	0	0	0	0.013333	0
rna-XM_027279933.1	gene-LOC104918031	LOC104918031	transmembrane protein 136, transcript variant X4	0.02	0	0	0	0	0	0	0	0	0	0	0	0.006667	0	0	0
rna-XM_010729650.3	gene-LOC104918033	LOC104918033	toll-like receptor 6	0.31	0.26	0.19	0.28	0.31	0.31	0.19	0.11	0.34	0.41	0.28	0.21	0.253333	0.3	0.213333	0.3
rna-XM_019278367.2	gene-LOC104918034	LOC104918034	adhesion G-protein coupled receptor G4, transcript variant X1	0	0	0	0	0	0	0	0	0	0	0	0	0	0	0	0
rna-XM_019278368.2	gene-LOC104918034	LOC104918034	adhesion G-protein coupled receptor G4, transcript variant X2	0	0	0	0	0	0	0	0	0	0	0	0	0	0	0	0
rna-XM_019278369.2	gene-LOC104918034	LOC104918034	adhesion G-protein coupled receptor G4, transcript variant X3	0	0	0	0	0	0	0	0	0	0	0	0	0	0	0	0
rna-XM_019278370.2	gene-LOC104918034	LOC104918034	adhesion G-protein coupled receptor G4, transcript variant X4	0	0	0	0.02	0	0	0	0.02	0	0	0	0	0	0.006667	0.006667	0
rna-XM_010729652.3	gene-LOC104918035	LOC104918035	pinopsin	0.12	0	0.11	0	0.11	0.26	0.11	0.11	0.15	0	0.06	0.1	0.076667	0.123333	0.123333	0.053333
rna-XM_010729654.3	gene-LOC104918037	LOC104918037	prolactin-releasing peptide receptor, transcript variant X1	0	0	0	0	0	0	0	0.03	0	0	0	0	0	0	0.01	0
rna-XM_027280645.1	gene-LOC104918037	LOC104918037	prolactin-releasing peptide receptor, transcript variant X2	0.03	0.09	0.03	0.03	0.03	0	0	0	0	0	0.03	0	0.05	0.02	0	0.01
rna-XM_019274401.2	gene-LOC104918039	LOC104918039	Down syndrome cell adhesion molecule-like protein 1 homolog, transcript variant X1	0.46	0	0.24	0	0	0.19	0	0	0.01	0	0.35	0.12	0.233333	0.063333	0.003333	0.156667
rna-XM_019274407.2	gene-LOC104918039	LOC104918039	Down syndrome cell adhesion molecule-like protein 1 homolog, transcript variant X2	0	0.3	0.16	0.25	0.28	0.2	0.35	0.18	0.33	0.35	0	0	0.153333	0.243333	0.286667	0.116667
rna-XM_010729657.3	gene-LOC104918041	LOC104918041	centrosomal protein of 57 kDa	0.13	1.43	1.51	1.5	1.03	0.07	0.76	0	1.49	0.25	1.49	0.63	1.02333	0.866667	0.75	0.79
rna-XM_019274289.2	gene-LOC104918042	LOC104918042	guanylate cyclase soluble subunit beta-2	0.03	0.05	0	0.05	0	0.02	0	0.03	0.02	0.12	0	0.09	0.026667	0.023333	0.016667	0.07
rna-XM_027280781.1	gene-LOC104918043	LOC104918043	zona pellucida-like domain-containing protein 1	0	0	0.03	0	0	0	0	0	0	0	0.07	0.21	0.01	0	0	0.093333
rna-XM_019258759.2	gene-LOC104918045	LOC104918045	extracellular serine/threonine protein kinase FAM20C, transcript variant X1	0	0	0	0	0	0	0	0	0	0	0.17	0.07	0	0	0	0.08
rna-XM_019258760.2	gene-LOC104918045	LOC104918045	extracellular serine/threonine protein kinase FAM20C, transcript variant X2	0	0.08	0.05	0.02	0	0	0	0	0	0	0	0	0.043333	0.006667	0	0
rna-XM_027289420.1	gene-LOC104918045	LOC104918045	extracellular serine/threonine protein kinase FAM20C, transcript variant X3	0.08	0.05	0	0.19	0.32	0.16	0.1	0.14	0.08	0.29	0.15	0.07	0.043333	0.223333	0.106667	0.17
rna-XM_010729667.3	gene-LOC104918051	LOC104918051	parvalbumin, thymic	0.14	0	0.13	0	0.25	0	0	0	0	0	0	0.35	0.09	0.083333	0	0.116667
rna-XM_010729669.3	gene-LOC104918052	LOC104918052	parvalbumin alpha-like	0	0	0	0	0	0	0	0	0.09	0	0	0	0	0	0.03	0
rna-XM_010729670.3	gene-LOC104918053	LOC104918053	parvalbumin, thymic CPV3-like, transcript variant X1	0	0	0	0	0	0	0	0	0	0	0	0	0	0	0	0
rna-XM_019272074.2	gene-LOC104918053	LOC104918053	parvalbumin, thymic CPV3-like, transcript variant X2	0	0	0	0	0	0	0	0	0	0	0	0	0	0	0	0
rna-XM_027289440.1	gene-LOC104918054	LOC104918054	vacuolar fusion protein CCZ1 homolog	0	0	0	0	0	0	0	0	0	0	0	0	0	0	0	0
rna-XM_010729687.3	gene-LOC104918065	LOC104918065	cytochrome b-c1 complex subunit 2, mitochondrial, transcript variant X1	4.26	4.82	3.18	4.05	3.91	4.1	3.52	4.65	3.43	5.62	5.67	3.54	4.08667	4.02	3.86667	4.94333
rna-XM_010729689.3	gene-LOC104918065	LOC104918065	cytochrome b-c1 complex subunit 2, mitochondrial, transcript variant X2	39.4	40.75	42.81	42.46	43.42	33.03	41.49	42.58	41.33	39.31	41.52	45.31	40.9867	39.6367	41.8	42.0467
rna-XM_010729693.3	gene-LOC104918066	LOC104918066	basic leucine zipper transcriptional factor ATF-like 3, transcript variant X1	3.99	5.68	6.57	5.15	14.6	5.88	7.21	8.95	2.83	4	11.23	8.59	5.41333	8.54333	6.33	7.94
rna-XM_027277777.1	gene-LOC104918066	LOC104918066	basic leucine zipper transcriptional factor ATF-like 3, transcript variant X2	0.18	0.23	0.31	0.19	0.6	0.22	0.55	0.29	0	0.5	0.28	0.34	0.24	0.336667	0.28	0.373333
rna-XM_010729692.3	gene-LOC104918068	LOC104918068	baculoviral IAP repeat-containing protein 5.2	10.97	11.11	11.23	9.56	8.4	7.51	7.89	6.76	10.83	7.82	8.48	11.51	11.1033	8.49	8.49333	9.27
rna-XM_010729695.3	gene-LOC104918070	LOC104918070	tumor necrosis factor alpha-induced protein 8-like protein 1	6.35	5.64	6.2	8.05	11.37	7.14	6.47	9.19	8.75	10.09	8.74	9.24	6.06333	8.85333	8.13667	9.35667
rna-XM_010729703.3	gene-LOC104918075	LOC104918075	sphingosine 1-phosphate receptor 4	269.25	237.98	267.75	280.47	326.64	314.85	283.13	305.6	286.98	251.14	304.8	252.36	258.327	307.32	291.903	269.433
rna-XM_019272075.2	gene-LOC104918079	LOC104918079	transmembrane protein 235	0.42	0.63	0.54	0.14	0.28	0.96	0.86	0.46	0.41	0.2	0.99	0.13	0.53	0.46	0.576667	0.44
rna-XR_002041655.2	gene-LOC104918084	LOC104918084	uncharacterized LOC104918084	10.48	12.79	13.17	10.18	15.27	8.96	13.3	6.08	17.04	16.45	16.6	17.55	12.1467	11.47	12.14	16.8667
rna-XM_027275757.1	gene-LOC104918085	LOC104918085	rho-related BTB domain-containing protein 2, transcript variant X1	4.38	3.95	3.34	6.12	2.88	3.89	4.08	4.19	4.56	3.77	3.02	4.18	3.89	4.29667	4.27667	3.65667
rna-XM_027275762.1	gene-LOC104918085	LOC104918085	rho-related BTB domain-containing protein 2, transcript variant X2	0.56	0.43	0.73	1.47	0.51	0.58	0.55	0.09	0.85	0.44	0.76	0.85	0.573333	0.853333	0.496667	0.683333
rna-XM_027275767.1	gene-LOC104918085	LOC104918085	rho-related BTB domain-containing protein 2, transcript variant X3	0	0.11	0.07	0.2	0.06	0.39	0.13	0	0.07	0.06	0	0	0.06	0.216667	0.066667	0.02
rna-XM_027275775.1	gene-LOC104918085	LOC104918085	rho-related BTB domain-containing protein 2, transcript variant X4	0.07	0	0.15	0.27	0	0.07	0.06	0.17	0.1	0	0.07	0.05	0.073333	0.113333	0.11	0.04
rna-XM_010729718.3	gene-LOC104918089	LOC104918089	aquaporin-3	0	0	0	0	0	0	0	0	0	0	0	0	0	0	0	0
rna-XM_010729719.3	gene-LOC104918090	LOC104918090	hypothetical protein, transcript variant X1	0.48	0.98	1.51	0.48	0.56	0.41	0.87	0.9	0.36	1.41	1.01	0.07	0.99	0.483333	0.71	0.83
rna-XR_003462043.1	gene-LOC104918090	LOC104918090	hypothetical protein, transcript variant X2	0.52	0.87	0.61	0.49	0.45	0.69	0.45	0.35	0.24	0.38	0.59	0.52	0.666667	0.543333	0.346667	0.496667
rna-XM_010729721.3	gene-LOC104918093	LOC104918093	arrestin domain-containing protein 3	7.26	6.32	6.5	5.77	4.69	5.85	7.34	8.23	8.13	7.85	7.01	4.37	6.69333	5.43667	7.9	6.41
rna-XM_027277856.1	gene-LOC104918097	LOC104918097	drebrin	12.73	9.39	5.11	13.01	7.76	15.06	12.09	6.64	11.84	6.87	4.81	13.85	9.07667	11.9433	10.19	8.51
rna-XM_010729730.3	gene-LOC104918098	LOC104918098	uncharacterized LOC104918098	2.8	4.97	2.56	4.26	3.08	2.44	2.12	2.72	1.97	2.52	2.65	4.6	3.44333	3.26	2.27	3.25667
rna-XM_010729727.3	gene-LOC104918099	LOC104918099	arrestin domain-containing protein 3	3.36	3.92	2.44	2.34	2.2	3.43	2.84	3.35	3.57	2.14	2.24	4.27	3.24	2.65667	3.25333	2.88333
rna-XM_010729749.3	gene-LOC104918109	LOC104918109	MOB kinase activator 2, transcript variant X1	5.07	3.25	4.57	5.19	3.61	5.27	4.97	4.21	5.64	4.95	2.3	2.96	4.29667	4.69	4.94	3.40333
rna-XM_019273793.2	gene-LOC104918109	LOC104918109	MOB kinase activator 2, transcript variant X2	0	0	0	0.18	0.29	0	0.2	0.28	0.17	0	1.04	0.18	0	0.156667	0.216667	0.406667
rna-XM_010729750.3	gene-LOC104918110	LOC104918110	serine/threonine-protein phosphatase 6 regulatory subunit 2-like, transcript variant X5	6.26	6.02	5.6	6.43	5.89	7.09	6.8	6.21	6.01	6.28	5.52	4.88	5.96	6.47	6.34	5.56
rna-XM_019273706.2	gene-LOC104918110	LOC104918110	serine/threonine-protein phosphatase 6 regulatory subunit 2-like, transcript variant X1	0	0	0	0	0	0	0	0	0	0	0	0	0	0	0	0
rna-XM_019273710.2	gene-LOC104918110	LOC104918110	serine/threonine-protein phosphatase 6 regulatory subunit 2-like, transcript variant X2	0	0	0	0	0	0	0	0	0	0	0.92	0.61	0	0	0	0.51
rna-XM_019273716.2	gene-LOC104918110	LOC104918110	serine/threonine-protein phosphatase 6 regulatory subunit 2-like, transcript variant X4	0.21	0.12	0.65	0.19	0.82	0.08	0.03	0	0	0.49	0.65	0.37	0.326667	0.363333	0.01	0.503333
rna-XM_027272615.1	gene-LOC104918110	LOC104918110	serine/threonine-protein phosphatase 6 regulatory subunit 2-like, transcript variant X3	0.2	0	0	0	0.28	0	0	0	0.5	0	0	0	0.066667	0.093333	0.166667	0
rna-XM_010729752.3	gene-LOC104918112	LOC104918112	calumenin-B, transcript variant X1	33.56	43.42	37.46	32.81	39.66	43.04	38.34	45.1	36.6	40.91	45.7	45.64	38.1467	38.5033	40.0133	44.0833
rna-XM_010729753.3	gene-LOC104918112	LOC104918112	calumenin-B, transcript variant X2	6.14	5.47	7.98	14.19	16.43	3.74	6.17	6.99	6.6	14.65	7.84	5.69	6.53	11.4533	6.58667	9.39333
rna-XM_019273970.2	gene-LOC104918112	LOC104918112	calumenin-B, transcript variant X3	0	0.2	0.22	1.47	0.65	0.61	1.01	1.15	0.73	0.22	0	1.91	0.14	0.91	0.963333	0.71
rna-XM_019273974.2	gene-LOC104918112	LOC104918112	calumenin-B, transcript variant X4	0.25	0.19	1.01	0.2	0.99	0.38	1.3	0.87	1.3	1.18	1.77	1.81	0.483333	0.523333	1.15667	1.58667
rna-XM_010729758.3	gene-LOC104918116	LOC104918116	UPF0577 protein KIAA1324-like	3.56	4.92	3.65	3.37	3.41	6.52	3.65	4.49	3.85	4.63	4.54	2.91	4.04333	4.43333	3.99667	4.02667
rna-XM_010729759.3	gene-LOC104918117	LOC104918117	metabotropic glutamate receptor 3, transcript variant X2	0.09	0.12	0	0	0	0	0	0.04	0	0	0.1	0.06	0.07	0	0.013333	0.053333
rna-XM_019273892.2	gene-LOC104918117	LOC104918117	metabotropic glutamate receptor 3, transcript variant X1	0	0	0.05	0	0.21	0	0.2	0	0	0.14	0	0.09	0.016667	0.07	0.066667	0.076667
rna-XM_019273903.2	gene-LOC104918117	LOC104918117	metabotropic glutamate receptor 3, transcript variant X3	0	0	0	0.08	0	0.08	0	0	0	0	0	0	0	0.053333	0	0
rna-XM_019273909.2	gene-LOC104918117	LOC104918117	metabotropic glutamate receptor 3, transcript variant X4	0	0.01	0	0	0	0	0	0	0.18	0	0.01	0	0.003333	0	0.06	0.003333
rna-XM_010729765.3	gene-LOC104918124	LOC104918124	leptin	0	0	0.11	0	0.66	0.05	0.11	0.18	0	0	0	0.41	0.036667	0.236667	0.096667	0.136667
rna-XM_019260006.2	gene-LOC104918125	LOC104918125	transmembrane protein 53	2.06	5.8	4.66	4.57	3.92	5.05	4.54	1.3	5.38	5.44	5	5.51	4.17333	4.51333	3.74	5.31667
rna-XM_019259999.2	gene-LOC104918127	LOC104918127	ankyrin repeat and protein kinase domain-containing protein 1, transcript variant X1	0	0.68	0.99	0.67	0.06	0.38	0.16	1	0.34	1.02	1.13	0	0.556667	0.37	0.5	0.716667
rna-XM_027273190.1	gene-LOC104918127	LOC104918127	ankyrin repeat and protein kinase domain-containing protein 1, transcript variant X2	0	0	0	0	0	0	0	0	0	0	0	0	0	0	0	0
rna-XM_027273191.1	gene-LOC104918127	LOC104918127	ankyrin repeat and protein kinase domain-containing protein 1, transcript variant X3	6.96	7.05	5.69	4.7	9.78	8.61	6.13	7.21	8.95	7.01	9.04	6.3	6.56667	7.69667	7.43	7.45
rna-XM_027273192.1	gene-LOC104918127	LOC104918127	ankyrin repeat and protein kinase domain-containing protein 1, transcript variant X4	0.26	0	0.12	0	0.15	0.29	0.27	0.15	0.26	0	0	0	0.126667	0.146667	0.226667	0
rna-XM_010729774.3	gene-LOC104918129	LOC104918129	uncharacterized LOC104918129	0	0	0	0	0	0	0.06	0	0	0	0	0.06	0	0	0.02	0.02
rna-XM_010729778.3	gene-LOC104918133	LOC104918133	pollen-specific leucine-rich repeat extensin-like protein 1	19.23	23.62	22.82	25.01	18.7	23.31	24.44	23.97	24.56	24.61	20.47	20.94	21.89	22.34	24.3233	22.0067
rna-XM_010729782.3	gene-LOC104918135	LOC104918135	transmembrane protein 116, transcript variant X1	0	0	0	0	0	0	0	0	0	0	0	0.08	0	0	0	0.026667
rna-XM_019260011.2	gene-LOC104918135	LOC104918135	transmembrane protein 116, transcript variant X2	0	0	0	0	0.03	0.03	0.03	0	0	0	0	0	0	0.02	0.01	0
rna-XM_010729783.3	gene-LOC104918136	LOC104918136	ADP-ribosylation factor 4	35.83	39.17	38.93	39.74	44.01	31.1	39.45	31.46	37.89	40.89	37.2	47.13	37.9767	38.2833	36.2667	41.74
rna-XM_019273687.2	gene-LOC104918137	LOC104918137	IQ motif and SEC7 domain-containing protein 3, transcript variant X1	0.16	0.1	0.12	0.14	0.11	0.12	0.07	0.11	0.09	0.2	0.17	0.14	0.126667	0.123333	0.09	0.17
rna-XM_019273690.2	gene-LOC104918137	LOC104918137	IQ motif and SEC7 domain-containing protein 3, transcript variant X2	0	0	0	0	0	0	0	0	0	0	0	0	0	0	0	0
rna-XM_019273698.2	gene-LOC104918138	LOC104918138	beta-1,4-N-acetylgalactosaminyltransferase 3, transcript variant X1	0	0	0	0	0	0	0	0	0	0	0	0	0	0	0	0
rna-XM_027272599.1	gene-LOC104918138	LOC104918138	beta-1,4-N-acetylgalactosaminyltransferase 3, transcript variant X2	0	0.03	0.01	0.01	0.01	0.02	0	0.09	0	0.02	0.01	0.05	0.013333	0.013333	0.03	0.026667
rna-XM_027272577.1	gene-LOC104918141	LOC104918141	uncharacterized LOC104918141	0	0.09	0.05	0	0	0.05	0.05	0.02	0.02	0	0.02	0	0.046667	0.016667	0.03	0.006667
rna-XM_019255630.2	gene-LOC104918142	LOC104918142	rab9 effector protein with kelch motifs	5.81	5.11	5.69	5.41	5.02	4.36	5.46	4.73	5.12	4.92	5.54	4.96	5.53667	4.93	5.10333	5.14
rna-XM_019273914.2	gene-LOC104918143	LOC104918143	zinc finger homeobox protein 3, transcript variant X1	0	0	0.02	0	0	0	0	0.01	0	0.01	0.01	0	0.006667	0	0.003333	0.006667
rna-XM_019273918.2	gene-LOC104918143	LOC104918143	zinc finger homeobox protein 3, transcript variant X2	0.02	0.02	0	0.02	0	0.02	0.02	0.04	0.03	0.03	0.03	0.03	0.013333	0.013333	0.03	0.03
rna-XM_027272591.1	gene-LOC104918146	LOC104918146	deoxyribodipyrimidine photo-lyase, transcript variant X1	0.09	0.08	0.22	0	0.08	0.15	0.25	0.12	0	0.14	0.04	0.25	0.13	0.076667	0.123333	0.143333
rna-XM_027272592.1	gene-LOC104918146	LOC104918146	deoxyribodipyrimidine photo-lyase, transcript variant X2	0	0	0	0.26	0	0	0	0	0.38	0	0	0	0	0.086667	0.126667	0
rna-XM_027272595.1	gene-LOC104918147	LOC104918147	glycine cleavage system H protein, mitochondrial	28.04	22.49	29.53	26.41	21.65	25.5	24.95	27.49	26.06	21.04	22.82	23.31	26.6867	24.52	26.1667	22.39
rna-XM_027272812.1	gene-LOC104918148	LOC104918148	protein piccolo, transcript variant X1	0	0	0	0	0	0	0	0	0	0	0	0	0	0	0	0
rna-XM_027272813.1	gene-LOC104918148	LOC104918148	protein piccolo, transcript variant X2	0	0	0	0	0	0	0	0	0	0	0	0	0	0	0	0
rna-XM_027272814.1	gene-LOC104918148	LOC104918148	protein piccolo, transcript variant X3	0	0	0	0	0	0	0	0	0	0	0	0	0	0	0	0
rna-XM_027272815.1	gene-LOC104918148	LOC104918148	protein piccolo, transcript variant X4	0	0	0	0	0	0	0	0	0	0	0	0	0	0	0	0
rna-XM_027272816.1	gene-LOC104918148	LOC104918148	protein piccolo, transcript variant X5	0	0	0	0	0	0	0	0	0	0	0	0	0	0	0	0
rna-XM_019275795.2	gene-LOC104918149	LOC104918149	leucine-rich repeat-containing protein 4, transcript variant X3	0	0	0	0	0	0	0	0	0	0	0	0	0	0	0	0
rna-XM_027273188.1	gene-LOC104918149	LOC104918149	leucine-rich repeat-containing protein 4, transcript variant X1	0	0	0	0	0	0	0	0	0	0	0	0	0	0	0	0
rna-XM_027273189.1	gene-LOC104918149	LOC104918149	leucine-rich repeat-containing protein 4, transcript variant X2	0	0	0	0	0	0	0	0	0	0	0	0	0	0	0	0
rna-XM_019260008.2	gene-LOC104918151	LOC104918151	B-cadherin	0	0	0.02	0.05	0.02	0	0.02	0	0	0.02	0	0.02	0.006667	0.023333	0.006667	0.013333
rna-XM_010729799.3	gene-LOC104918152	LOC104918152	neuropilin and tolloid-like protein 2	0.47	0.51	0.79	0.47	0.44	0.41	0.55	1.1	0.4	0.49	0.4	0.33	0.59	0.44	0.683333	0.406667
rna-XM_010729800.3	gene-LOC104918154	LOC104918154	protein tyrosine phosphatase domain-containing protein 1	0.05	0.11	0.02	0.12	0.08	0.04	0.05	0.03	0.01	0.08	0.1	0.07	0.06	0.08	0.03	0.083333
rna-XM_019260012.2	gene-LOC104918155	LOC104918155	outer dense fiber protein 3-B	0.07	0	0	0	0	0	0	0	0	0	0	0	0.023333	0	0	0
rna-XM_010729802.3	gene-LOC104918156	LOC104918156	receptor activity-modifying protein 3	2.72	2.35	2.18	3.37	4.4	4.72	3.94	3.99	4.19	4.88	4.36	2.52	2.41667	4.16333	4.04	3.92
rna-XR_796995.3	gene-LOC104918165	LOC104918165	uncharacterized LOC104918165	2.27	1.53	1.84	2.04	1.95	1.32	1.51	1.75	2.17	1.62	1.64	2.12	1.88	1.77	1.81	1.79333
rna-XM_019274851.2	gene-LOC104918170	LOC104918170	endophilin-B1	45.67	49.28	50.72	49.3	54.22	46.29	44.75	49.29	44.58	51.88	51.82	52.12	48.5567	49.9367	46.2067	51.94
rna-XM_019274852.2	gene-LOC104918171	LOC104918171	crystallin J1B-like, transcript variant X1	22.53	36.19	22.11	58.6	12.33	15.98	20.68	12.29	13.05	18.66	16.16	45.75	26.9433	28.97	15.34	26.8567
rna-XM_019274853.2	gene-LOC104918171	LOC104918171	crystallin J1B-like, transcript variant X2	1.13	0.51	0.61	1.36	0.75	1.34	0.28	0.5	1.03	0.79	0.19	1.22	0.75	1.15	0.603333	0.733333
rna-XM_019273086.2	gene-LOC104918178	LOC104918178	mucin-16	0.58	0.59	0.47	0.51	0.3	0.67	0.59	0.43	0.68	0.52	0.27	0.25	0.546667	0.493333	0.566667	0.346667
rna-XM_027274420.1	gene-LOC104918179	LOC104918179	cyclic nucleotide-gated cation channel beta-3-like	0	0	0	0	0	0	0	0	0	0	0	0	0	0	0	0
rna-XM_027274421.1	gene-LOC104918180	LOC104918180	cyclic nucleotide-gated cation channel beta-3-like	0.46	0.11	0.22	0.24	0.24	0.32	0.3	0.22	0.33	0.21	0.07	0.08	0.263333	0.266667	0.283333	0.12
rna-XM_010729828.3	gene-LOC104918181	LOC104918181	SH2 domain-containing adapter protein E	10.46	9.39	9.3	12.45	14.99	13.71	14.66	13.75	11.78	16.87	11.5	10.12	9.71667	13.7167	13.3967	12.83
rna-XM_010729832.3	gene-LOC104918183	LOC104918183	protein S100-A1	0	0	0	0.22	0.11	0.53	0.33	0	0.1	0	0.12	0.21	0	0.286667	0.143333	0.11
rna-XM_010729833.3	gene-LOC104918184	LOC104918184	protein S100-A16	48.71	62.25	74.68	54.95	74.81	81.76	62.91	54.77	54.91	90.73	57.14	75.77	61.88	70.5067	57.53	74.5467
rna-XM_010729834.3	gene-LOC104918185	LOC104918185	protein S100-A11	0	0	0	0	0.18	0	0.24	0	0	0	0.06	0	0	0.06	0.08	0.02
rna-XM_010729855.3	gene-LOC104918196	LOC104918196	protein S100-A1	301.05	345.88	270.85	353.87	257.63	598.32	291.09	376.97	364.94	353.73	307.08	276.1	305.927	403.273	344.333	312.303
rna-XM_027273639.1	gene-LOC104918199	LOC104918199	mitochondrial import receptor subunit TOM20 homolog	35.73	30.85	33.67	31.7	35.33	30.15	37.07	39.38	37.37	35.72	37.34	31.96	33.4167	32.3933	37.94	35.0067
rna-XM_027278481.1	gene-LOC104918202	LOC104918202	uncharacterized LOC104918202	53.34	56.02	59.21	45.17	53.61	53.12	54.92	51.85	49.26	57.17	53.85	48.44	56.19	50.6333	52.01	53.1533
rna-XM_010729869.3	gene-LOC104918204	LOC104918204	Docking protein 1	41.06	32.44	30.79	33.77	31.62	35.74	40.56	41.56	39.47	36.06	37.66	32.19	34.7633	33.71	40.53	35.3033
rna-XM_010729875.3	gene-LOC104918209	LOC104918209	opsin-5	0	0	0	0	0	0	0	0	0	0	0	0	0	0	0	0
rna-XM_010729893.3	gene-LOC104918221	LOC104918221	semaphorin-4F	10.38	10.04	8.97	8.48	9.02	8.37	10.39	10.08	10.57	9.46	9.7	8.85	9.79667	8.62333	10.3467	9.33667
rna-XM_019253955.2	gene-LOC104918222	LOC104918222	tripartite motif-containing protein 46, transcript variant X1	0.13	0.06	0.08	0.04	0.03	0.1	0.14	0.15	0.03	0.11	0.06	0.04	0.09	0.056667	0.106667	0.07
rna-XM_019253956.2	gene-LOC104918222	LOC104918222	tripartite motif-containing protein 46, transcript variant X2	0	0	0	0	0.03	0	0	0	0	0	0.04	0	0	0.01	0	0.013333
rna-XM_010729909.3	gene-LOC104918233	LOC104918233	ADP-ribosylation factor-like protein 5A	13.51	13.16	14	10.55	13.7	11.82	12.6	14.38	11.57	11.25	14.58	13.63	13.5567	12.0233	12.85	13.1533
rna-XM_027277871.1	gene-LOC104918237	LOC104918237	mitogen-activated protein kinase kinase kinase kinase 4, transcript variant X1	0.14	0.33	0	0.14	0.16	0.24	0.17	0.23	0.37	0.25	0	0.13	0.156667	0.18	0.256667	0.126667
rna-XM_027277874.1	gene-LOC104918237	LOC104918237	mitogen-activated protein kinase kinase kinase kinase 4, transcript variant X2	0	0	0	0	0	0.07	0	0	0	0	0	0	0	0.023333	0	0
rna-XM_027277875.1	gene-LOC104918237	LOC104918237	mitogen-activated protein kinase kinase kinase kinase 4, transcript variant X3	0.38	0	0.28	0	0.19	0	0.42	0	0	0.24	0.25	0.25	0.22	0.063333	0.14	0.246667
rna-XM_027277877.1	gene-LOC104918237	LOC104918237	mitogen-activated protein kinase kinase kinase kinase 4, transcript variant X4	0	0.16	0	0	0	0	0	0	0	0	0.08	0	0.053333	0	0	0.026667
rna-XM_027277881.1	gene-LOC104918237	LOC104918237	mitogen-activated protein kinase kinase kinase kinase 4, transcript variant X5	0	0	0	0	0	0	0	0	0	0	0	0	0	0	0	0
rna-XM_027277883.1	gene-LOC104918237	LOC104918237	mitogen-activated protein kinase kinase kinase kinase 4, transcript variant X6	0	0	0	0.11	0	0	0	0	0	0	0	0	0	0.036667	0	0
rna-XM_010729914.3	gene-LOC104918238	LOC104918238	interleukin-1 receptor type 2, transcript variant X1	0	0.51	0.96	1.06	0	0.89	0.2	0.33	0	0.43	0.69	0.18	0.49	0.65	0.176667	0.433333
rna-XM_010729915.3	gene-LOC104918238	LOC104918238	interleukin-1 receptor type 2, transcript variant X2	0.71	0.76	0	1.72	2.91	0.58	1.94	0	0.55	0	2.01	1.8	0.49	1.73667	0.83	1.27
rna-XM_027277897.1	gene-LOC104918240	LOC104918240	uncharacterized LOC104918240, transcript variant X2	0.34	1.03	0.56	0.51	0.27	0	0.86	1.02	0.29	0	0.65	0.28	0.643333	0.26	0.723333	0.31
rna-XR_003462277.1	gene-LOC104918240	LOC104918240	uncharacterized LOC104918240, transcript variant X1	0.77	0.42	0.65	0.72	0.94	0.87	0	0	1.14	1.04	0	0.58	0.613333	0.843333	0.38	0.54
rna-XR_003462278.1	gene-LOC104918240	LOC104918240	uncharacterized LOC104918240, transcript variant X3	0	0	0	0	0	0.04	0	0	0	0.17	0	0	0	0.013333	0	0.056667
rna-XR_003462279.1	gene-LOC104918240	LOC104918240	uncharacterized LOC104918240, transcript variant X4	0.15	0.2	0.23	0.08	0	0	0.1	0.13	0.09	0	0	0.06	0.193333	0.026667	0.106667	0.02
rna-XR_003462280.1	gene-LOC104918240	LOC104918240	uncharacterized LOC104918240, transcript variant X5	0	0	0	0	0	0	0.28	0	0	0	0.56	0	0	0	0.093333	0.186667
rna-XM_027277887.1	gene-LOC104918243	LOC104918243	NLR family CARD domain-containing protein 3-like	0	0.38	0	0	0.51	0.19	0	0	0.81	0.91	0.37	0	0.126667	0.233333	0.27	0.426667
rna-XM_027274346.1	gene-LOC104918244	LOC104918244	NLR family CARD domain-containing protein 3-like	47.41	45.15	55.53	46.12	44.16	52.75	49.89	49.18	37.69	51.21	49.49	39.01	49.3633	47.6767	45.5867	46.57
rna-XM_010729922.3	gene-LOC104918246	LOC104918246	interleukin-18 receptor accessory protein	22.06	23.59	18.05	26.56	28.95	28.77	23.82	23.75	25.99	29.04	40.6	28.9	21.2333	28.0933	24.52	32.8467
rna-XM_010729926.3	gene-LOC104918248	LOC104918248	motor neuron and pancreas homeobox protein 1-like	0.03	0	0	0	0	0	0	0.12	0.03	0	0	0	0.01	0	0.05	0
rna-XM_010729928.3	gene-LOC104918250	LOC104918250	fibronectin, transcript variant X2	0.74	0.84	1.07	2.07	1.57	1.6	1.46	1.15	0.69	2.62	2.4	1.05	0.883333	1.74667	1.1	2.02333
rna-XM_010729930.3	gene-LOC104918250	LOC104918250	fibronectin, transcript variant X1	4.57	2	1.59	0.83	2.28	3.69	0.84	4.03	3.17	2.58	1.97	1.03	2.72	2.26667	2.68	1.86
rna-XM_010729932.3	gene-LOC104918252	LOC104918252	RNA-binding motif, single-stranded-interacting protein 1-like, transcript variant X1	0.55	0.39	0.78	0.72	0.33	0.54	0.69	0.44	0.53	0.37	0.43	0.37	0.573333	0.53	0.553333	0.39
rna-XM_010729934.3	gene-LOC104918252	LOC104918252	RNA-binding motif, single-stranded-interacting protein 1-like, transcript variant X2	7.06	8.24	10.23	9.9	10.53	11	8.66	9.44	9.21	8.42	8.68	10.3	8.51	10.4767	9.10333	9.13333
rna-XM_010729936.3	gene-LOC104918254	LOC104918254	lymphocyte antigen 75	0	0	0	0	0	0	0	0	0	0	0	0	0	0	0	0
rna-XM_019262331.2	gene-LOC104918256	LOC104918256	bromodomain adjacent to zinc finger domain protein 2B, transcript variant X1	0	0.47	0	0.31	1.57	0.93	1.09	0.75	0.27	0.67	0.26	0	0.156667	0.936667	0.703333	0.31
rna-XM_019262333.2	gene-LOC104918256	LOC104918256	bromodomain adjacent to zinc finger domain protein 2B, transcript variant X2	0.69	1.11	0.86	0.33	0.44	0.46	0	0.07	0.24	0	0	0.31	0.886667	0.41	0.103333	0.103333
rna-XM_019262334.2	gene-LOC104918256	LOC104918256	bromodomain adjacent to zinc finger domain protein 2B, transcript variant X3	0.99	1.49	1.92	1.91	1.29	1.31	1.99	1	1.66	1.18	1.59	1.26	1.46667	1.50333	1.55	1.34333
rna-XM_019262335.2	gene-LOC104918256	LOC104918256	bromodomain adjacent to zinc finger domain protein 2B, transcript variant X4	1.27	1.13	1.38	0.46	1.21	0.74	1.27	1.1	0.66	0.3	0.51	0.23	1.26	0.803333	1.01	0.346667
rna-XM_019262336.2	gene-LOC104918256	LOC104918256	bromodomain adjacent to zinc finger domain protein 2B, transcript variant X5	1.45	0.06	0.63	0.28	0.94	1.01	1.46	1.22	0.68	1.27	1.4	1.83	0.713333	0.743333	1.12	1.5
rna-XM_019262337.2	gene-LOC104918256	LOC104918256	bromodomain adjacent to zinc finger domain protein 2B, transcript variant X6	0.7	0.52	0	0.1	0.1	0.39	0.47	0	1.33	0.38	0.43	0.59	0.406667	0.196667	0.6	0.466667
rna-XM_019262338.2	gene-LOC104918256	LOC104918256	bromodomain adjacent to zinc finger domain protein 2B, transcript variant X7	0	0.19	0	0	0	0	0	0.36	0	0.92	0	0.18	0.063333	0	0.12	0.366667
rna-XM_019262339.2	gene-LOC104918256	LOC104918256	bromodomain adjacent to zinc finger domain protein 2B, transcript variant X8	2.67	1.66	1.91	1.98	2.68	1.89	1.39	2.54	1.77	2.03	2.07	1.68	2.08	2.18333	1.9	1.92667
rna-XM_019262340.2	gene-LOC104918256	LOC104918256	bromodomain adjacent to zinc finger domain protein 2B, transcript variant X9	1.11	1.38	1.64	1.8	1.59	1.57	0.56	0.96	1.38	1.93	1.97	0.87	1.37667	1.65333	0.966667	1.59
rna-XM_019262341.2	gene-LOC104918256	LOC104918256	bromodomain adjacent to zinc finger domain protein 2B, transcript variant X11	1.18	1.01	1.35	0.97	1.5	1.53	0.51	0.85	1.59	0.9	1.03	0.95	1.18	1.33333	0.983333	0.96
rna-XM_019262342.2	gene-LOC104918256	LOC104918256	bromodomain adjacent to zinc finger domain protein 2B, transcript variant X12	0.92	0.53	0.32	0.78	0.1	0.29	0.36	0.25	0.64	0.74	0.56	1.22	0.59	0.39	0.416667	0.84
rna-XM_019262343.2	gene-LOC104918256	LOC104918256	bromodomain adjacent to zinc finger domain protein 2B, transcript variant X10	0	0	0.24	0.36	0	0	0.28	1.39	0	0	0.39	0.41	0.08	0.12	0.556667	0.266667
rna-XM_010729953.3	gene-LOC104918258	LOC104918258	WD repeat, SAM and U-box domain-containing protein 1, transcript variant X1	0	0.07	1.66	2.21	1.85	1.42	0	1.36	1.05	2.09	0	1.75	0.576667	1.82667	0.803333	1.28
rna-XM_010729954.3	gene-LOC104918258	LOC104918258	WD repeat, SAM and U-box domain-containing protein 1, transcript variant X2	2.9	2.72	2.99	2.58	1.48	4.08	2.87	3.18	2	0.77	2.71	2.42	2.87	2.71333	2.68333	1.96667
rna-XM_010729955.3	gene-LOC104918258	LOC104918258	WD repeat, SAM and U-box domain-containing protein 1, transcript variant X3	1.88	1.31	0.23	0.77	2	1.42	2.51	1.67	0	2.24	1.71	0.72	1.14	1.39667	1.39333	1.55667
rna-XM_010729956.3	gene-LOC104918258	LOC104918258	WD repeat, SAM and U-box domain-containing protein 1, transcript variant X4	2.92	2.42	2.49	1.57	1.09	1.39	2.27	1.54	4.24	2.19	2.68	4.01	2.61	1.35	2.68333	2.96
rna-XM_010729957.3	gene-LOC104918258	LOC104918258	WD repeat, SAM and U-box domain-containing protein 1, transcript variant X5	0.29	1.35	0	0	0.54	0	0.25	0	0	0	0.36	0.52	0.546667	0.18	0.083333	0.293333
rna-XM_010729961.3	gene-LOC104918259	LOC104918259	epoxide hydrolase 1, transcript variant X1	1.04	0.35	0.86	0.47	0.48	0.66	0.45	0.59	1.25	0.74	0.54	0	0.75	0.536667	0.763333	0.426667
rna-XM_019266296.2	gene-LOC104918259	LOC104918259	epoxide hydrolase 1, transcript variant X2	0	0	0	0	0	0	0	0	0	0	0	0.6	0	0	0	0.2
rna-XR_002042136.2	gene-LOC104918260	LOC104918260	uncharacterized LOC104918260	16.36	14.2	14.88	10.78	18.34	18	15.42	16.56	18.56	15.61	11.26	12.19	15.1467	15.7067	16.8467	13.02
rna-XM_010729962.3	gene-LOC104918263	LOC104918263	cytochrome P450 27C1	0	0	0	0	0.02	0	0.02	0	0	0	0	0	0	0.006667	0.006667	0
rna-XM_027281602.1	gene-LOC104918267	LOC104918267	interleukin-1 receptor accessory protein, transcript variant X1	1.35	0.42	0	0.17	1.41	0	0	0	0.5	0.28	0	1.09	0.59	0.526667	0.166667	0.456667
rna-XM_027281603.1	gene-LOC104918267	LOC104918267	interleukin-1 receptor accessory protein, transcript variant X2	3.86	2.81	2.79	1.99	2.3	1.83	2.14	2.05	3.32	2.46	2.36	5.7	3.15333	2.04	2.50333	3.50667
rna-XM_027281604.1	gene-LOC104918267	LOC104918267	interleukin-1 receptor accessory protein, transcript variant X3	13.69	23.99	16.01	6.03	3.22	14.41	25.37	23.33	3.14	30.53	30.91	10.31	17.8967	7.88667	17.28	23.9167
rna-XM_019262355.2	gene-LOC104918269	LOC104918269	protein TANC1	1.34	1.29	1.26	1.48	1.22	1.61	1.07	1.21	1.5	1.31	1.15	1.31	1.29667	1.43667	1.26	1.25667
rna-XM_010729972.3	gene-LOC104918270	LOC104918270	cystatin	396.36	493.33	441.17	465.33	430.59	569.79	463.18	446.04	472.25	550.25	464.55	464.17	443.62	488.57	460.49	492.99
rna-XM_027281705.1	gene-LOC104918272	LOC104918272	protocadherin-9, transcript variant X1	0	0	0	0	0.07	0.03	0.01	0.01	0	0.01	0.01	0.01	0	0.033333	0.006667	0.01
rna-XM_027281706.1	gene-LOC104918272	LOC104918272	protocadherin-9, transcript variant X2	0	0	0	0	0	0	0	0	0	0	0	0	0	0	0	0
rna-XM_027281707.1	gene-LOC104918272	LOC104918272	protocadherin-9, transcript variant X3	0	0	0	0	0	0	0	0	0	0	0	0	0	0	0	0
rna-XM_027281708.1	gene-LOC104918272	LOC104918272	protocadherin-9, transcript variant X4	0	0	0	0	0	0	0	0	0	0	0	0	0	0	0	0
rna-XM_027288527.1	gene-LOC104918274	LOC104918274	serotransferrin	0.03	0.02	0.03	0.17	0.12	0.02	0.02	0.03	0	0.15	0.25	0.04	0.026667	0.103333	0.016667	0.146667
rna-XM_019262190.2	gene-LOC104918275	LOC104918275	eukaryotic translation initiation factor 4 gamma 1, transcript variant X1	0	0	0	0	0	0	0	0	0	0	0	0	0	0	0	0
rna-XM_019262191.2	gene-LOC104918275	LOC104918275	eukaryotic translation initiation factor 4 gamma 1, transcript variant X5	0.53	1.47	0	0.14	0	0.48	0.62	1.09	0	1.4	1.42	0	0.666667	0.206667	0.57	0.94
rna-XM_027288333.1	gene-LOC104918275	LOC104918275	eukaryotic translation initiation factor 4 gamma 1, transcript variant X2	0	0	0	0.28	0	0	0	0	0	0	0	0.29	0	0.093333	0	0.096667
rna-XM_027288337.1	gene-LOC104918275	LOC104918275	eukaryotic translation initiation factor 4 gamma 1, transcript variant X3	0	0	0.66	0	0	0	0	0	0	0	0	0	0.22	0	0	0
rna-XM_027288340.1	gene-LOC104918275	LOC104918275	eukaryotic translation initiation factor 4 gamma 1, transcript variant X4	0.24	0.64	1.21	1.32	1.1	0.68	0.39	0.74	0.98	1.12	0.79	0.92	0.696667	1.03333	0.703333	0.943333
rna-XM_019262205.2	gene-LOC104918276	LOC104918276	protein FAM131A	0.16	0.1	0.15	0.42	0	0.23	0.05	0.31	0.18	0	0.05	0	0.136667	0.216667	0.18	0.016667
rna-XM_010729978.3	gene-LOC104918277	LOC104918277	zona pellucida sperm-binding protein 4	0	0	0	0	0	0	0	0	0.72	0	0	0	0	0	0.24	0
rna-XM_010730018.3	gene-LOC104918278	LOC104918278	tropomyosin alpha-1 chain, transcript variant X1	0	0	0	0	0	0.35	0	0.21	0	0	0	0.1	0	0.116667	0.07	0.033333
rna-XM_010730175.3	gene-LOC104918278	LOC104918278	tropomyosin alpha-1 chain, transcript variant X2	0	0	0	0	0	0.3	0	0	0	0	0	0.05	0	0.1	0	0.016667
rna-XM_010730255.3	gene-LOC104918278	LOC104918278	tropomyosin alpha-1 chain, transcript variant X4	0	0	0	0.07	0	0	0	0.15	0	0.07	0	0	0	0.023333	0.05	0.023333
rna-XM_019278905.2	gene-LOC104918278	LOC104918278	tropomyosin alpha-1 chain, transcript variant X3	0	0	0	0	0	0.08	0	0	0	0	0	0	0	0.026667	0	0
rna-XM_019278906.2	gene-LOC104918278	LOC104918278	tropomyosin alpha-1 chain, transcript variant X6	0	0	0	0	0	0	0	0	0.19	0	0	0	0	0	0.063333	0
rna-XM_019278907.2	gene-LOC104918278	LOC104918278	tropomyosin alpha-1 chain, transcript variant X5	0	0	0.05	0	0.22	0	0.09	0	0.33	0	0	0	0.016667	0.073333	0.14	0
rna-XM_019266254.2	gene-LOC104918279	LOC104918279	glycine N-acyltransferase-like protein 3	0.1	0.37	0.22	0.27	0.28	0.27	0.25	0.16	0.26	0.13	0.29	0.06	0.23	0.273333	0.223333	0.16
rna-XM_010729979.3	gene-LOC104918280	LOC104918280	solute carrier family 12 member 9	0	0.02	0	0	0	0	0	0	0.1	0	0	0	0.006667	0	0.033333	0
rna-XM_010729980.3	gene-LOC104918281	LOC104918281	period circadian protein homolog 2, transcript variant X4	0	0.06	0	0	0.17	0	0.05	0	0.61	0.13	0	0	0.02	0.056667	0.22	0.043333
rna-XM_019262250.2	gene-LOC104918281	LOC104918281	period circadian protein homolog 2, transcript variant X1	0.68	0.33	0	0	0	0.23	0	0.21	0	0	0	0	0.336667	0.076667	0.07	0
rna-XM_019262251.2	gene-LOC104918281	LOC104918281	period circadian protein homolog 2, transcript variant X2	0	0.2	0	0	0	0	0	0	0	0	0.17	0	0.066667	0	0	0.056667
rna-XM_019262252.2	gene-LOC104918281	LOC104918281	period circadian protein homolog 2, transcript variant X3	0	0	0	0	0	0	0	0.29	0	0.14	0	0	0	0	0.096667	0.046667
rna-XM_019262253.2	gene-LOC104918281	LOC104918281	period circadian protein homolog 2, transcript variant X5	0	0	0.28	0.47	0.4	0.56	0.14	0	0.12	0.16	0.18	0.47	0.093333	0.476667	0.086667	0.27
rna-XM_010729983.3	gene-LOC104918282	LOC104918282	transcription cofactor HES-6	5.64	5.05	6.27	4.68	4.65	3.31	4.86	3.84	5.93	3.97	6	4.6	5.65333	4.21333	4.87667	4.85667
rna-XM_010729984.3	gene-LOC104918283	LOC104918283	integral membrane protein 2C, transcript variant X1	3.69	3.15	3.13	3.48	3.98	3	2.17	3.27	2.85	2.68	2.61	2.68	3.32333	3.48667	2.76333	2.65667
rna-XM_010729985.3	gene-LOC104918283	LOC104918283	integral membrane protein 2C, transcript variant X2	0.57	1.31	2.73	0.57	0.7	0.48	0.57	0.55	0.78	0.61	0.72	1.54	1.53667	0.583333	0.633333	0.956667
rna-XM_010729988.3	gene-LOC104918286	LOC104918286	glutamine synthetase	65.01	107.54	162.12	103.72	139.24	93.8	78.37	80.94	95.36	102.59	87.19	159.87	111.557	112.253	84.89	116.55
rna-XM_010729989.3	gene-LOC104918287	LOC104918287	pre-B-cell leukemia transcription factor 1, transcript variant X1	0	0	0	0	0.23	0	0	0	0	0	0	0	0	0.076667	0	0
rna-XM_010729990.3	gene-LOC104918287	LOC104918287	pre-B-cell leukemia transcription factor 1, transcript variant X2	0	0.2	0	0	0	0	0	0	0	0	0	0	0.066667	0	0	0
rna-XM_010729991.3	gene-LOC104918289	LOC104918289	hypoxanthine-guanine phosphoribosyltransferase	1.53	1.17	2.67	1.55	1.93	1.65	1.56	1.42	1.72	1.22	1.61	1.06	1.79	1.71	1.56667	1.29667
rna-XM_010729992.3	gene-LOC104918290	LOC104918290	rho GTPase-activating protein 21, transcript variant X1	0	0	0	1.78	0.82	0	1.25	0.03	0.06	0	0.13	1.59	0	0.866667	0.446667	0.573333
rna-XM_010729993.3	gene-LOC104918290	LOC104918290	rho GTPase-activating protein 21, transcript variant X3	0.51	1.35	1.56	0	0.1	0.57	0.29	0.43	0.25	0.53	1.44	0.59	1.14	0.223333	0.323333	0.853333
rna-XM_019262227.2	gene-LOC104918290	LOC104918290	rho GTPase-activating protein 21, transcript variant X2	1.18	0.92	1.23	0.78	1.17	1.02	0.25	1.45	1.18	0.97	1.47	0	1.11	0.99	0.96	0.813333
rna-XM_019262228.2	gene-LOC104918290	LOC104918290	rho GTPase-activating protein 21, transcript variant X4	0	0.07	0	0	0	0	0	0.08	0	0	0	0	0.023333	0	0.026667	0
rna-XM_019262048.2	gene-LOC104918291	LOC104918291	dipeptidyl aminopeptidase-like protein 6, transcript variant X1	0	0	0	0	0	0	0	0	0	0	0	0	0	0	0	0
rna-XM_019262049.2	gene-LOC104918291	LOC104918291	dipeptidyl aminopeptidase-like protein 6, transcript variant X2	2.06	1.16	0.34	0.44	0.22	0.47	2.03	0.58	0.99	1.37	0.37	0.83	1.18667	0.376667	1.2	0.856667
rna-XM_019262050.2	gene-LOC104918291	LOC104918291	dipeptidyl aminopeptidase-like protein 6, transcript variant X3	0	0	0	0	0	0	0	0	0	0	0	0	0	0	0	0
rna-XM_019262051.2	gene-LOC104918291	LOC104918291	dipeptidyl aminopeptidase-like protein 6, transcript variant X4	0	0	0	0	0	0	0	0	0	0	0	0	0	0	0	0
rna-XM_019262052.1	gene-LOC104918291	LOC104918291	dipeptidyl aminopeptidase-like protein 6, transcript variant X5	1.35	0.88	1.64	2.48	2.31	3.65	2.24	3.5	1.86	3.78	2.85	2.88	1.29	2.81333	2.53333	3.17
rna-XM_019262245.2	gene-LOC104918292	LOC104918292	5'-AMP-activated protein kinase subunit gamma-2, transcript variant X3	0	0	0	0	0	0	0	0.18	0.35	0	0	0.55	0	0	0.176667	0.183333
rna-XM_019262246.2	gene-LOC104918292	LOC104918292	5'-AMP-activated protein kinase subunit gamma-2, transcript variant X4	0	0.07	0.13	0.06	0	0	0.06	0	0	0	0.07	0.13	0.066667	0.02	0.02	0.066667
rna-XM_019262247.2	gene-LOC104918292	LOC104918292	5'-AMP-activated protein kinase subunit gamma-2, transcript variant X5	0.07	0.06	0.07	0.06	0	0.06	0	0.07	0.24	0.23	0.06	0	0.066667	0.04	0.103333	0.096667
rna-XM_019262248.2	gene-LOC104918292	LOC104918292	5'-AMP-activated protein kinase subunit gamma-2, transcript variant X7	0.43	0	0.85	0.64	0.79	0	0	1.1	0	0	0	0	0.426667	0.476667	0.366667	0
rna-XM_027290153.1	gene-LOC104918292	LOC104918292	5'-AMP-activated protein kinase subunit gamma-2, transcript variant X1	2.41	1.16	2.48	1.34	2.12	1.52	1.17	3.05	1.23	3.4	2.58	1.78	2.01667	1.66	1.81667	2.58667
rna-XM_027290163.1	gene-LOC104918292	LOC104918292	5'-AMP-activated protein kinase subunit gamma-2, transcript variant X6	5.61	5.64	3.84	4.76	4.63	7.37	5.49	4.57	5.83	4.85	5.61	5.25	5.03	5.58667	5.29667	5.23667
rna-XR_003464036.1	gene-LOC104918292	LOC104918292	5'-AMP-activated protein kinase subunit gamma-2, transcript variant X2	0.7	0.72	0.34	0.75	0.19	0.38	0.45	0.18	1.62	0.18	0.39	0	0.586667	0.44	0.75	0.19
rna-XM_010730001.3	gene-LOC104918296	LOC104918296	tetratricopeptide repeat protein 39C, transcript variant X1	7.95	8.1	7.62	8.31	9.39	7.97	8.56	6.94	7.97	6.76	8.1	6.14	7.89	8.55667	7.82333	7
rna-XM_027290308.1	gene-LOC104918296	LOC104918296	tetratricopeptide repeat protein 39C, transcript variant X2	3.4	4.51	6.81	7.19	4.43	4.14	7.23	3.82	4.66	5.41	4.83	5.35	4.90667	5.25333	5.23667	5.19667
rna-XM_027290309.1	gene-LOC104918296	LOC104918296	tetratricopeptide repeat protein 39C, transcript variant X3	1.17	0	0	0	0.65	0	0	2.41	0	0	1.85	0	0.39	0.216667	0.803333	0.616667
rna-XM_019262197.2	gene-LOC104918304	LOC104918304	chloride channel protein 2, transcript variant X1	0	0	0	0	0	0	0	0	0	0	0	0	0	0	0	0
rna-XM_019262198.1	gene-LOC104918304	LOC104918304	chloride channel protein 2, transcript variant X2	0.1	0	0	0	0	0	0	0.22	0	0	0	0	0.033333	0	0.073333	0
rna-XM_019262199.2	gene-LOC104918304	LOC104918304	chloride channel protein 2, transcript variant X3	0.12	0.08	0.06	0.18	0	0.16	0.24	0.15	0.05	0	0.04	0	0.086667	0.113333	0.146667	0.013333
rna-XM_019262200.2	gene-LOC104918304	LOC104918304	chloride channel protein 2, transcript variant X4	0.03	0.14	0.11	0	0	0.06	0.06	0.16	0.14	0	0	0	0.093333	0.02	0.12	0
rna-XM_019262201.1	gene-LOC104918304	LOC104918304	chloride channel protein 2, transcript variant X5	0.18	0.14	0.17	0.03	0	0.12	0.25	0.26	0.26	0.12	0.04	0.04	0.163333	0.05	0.256667	0.066667
rna-XM_019262202.2	gene-LOC104918304	LOC104918304	chloride channel protein 2, transcript variant X6	0.09	0.06	0	0.07	0	0.04	0.13	0	0.32	0.18	0.18	0.12	0.05	0.036667	0.15	0.16
rna-XM_019262203.2	gene-LOC104918304	LOC104918304	chloride channel protein 2, transcript variant X7	0.1	0	0	0.2	0.17	0.28	0	0	0	0.07	0.23	0.07	0.033333	0.216667	0	0.123333
rna-XM_019262142.2	gene-LOC104918305	LOC104918305	G-protein coupled receptor 55, transcript variant X1	0	0	0	0	0	0	0.48	0.45	0	0	0	0.93	0	0	0.31	0.31
rna-XM_019262144.2	gene-LOC104918305	LOC104918305	G-protein coupled receptor 55, transcript variant X2	0.66	0.91	0.96	0.67	0.74	0.2	0	0	0.68	0.34	0.4	0.33	0.843333	0.536667	0.226667	0.356667
rna-XM_027290115.1	gene-LOC104918307	LOC104918307	histone-lysine N-methyltransferase 2C, transcript variant X1	0	0	0	0	0	0	0	0	0	0	0	0	0	0	0	0
rna-XM_027290119.1	gene-LOC104918307	LOC104918307	histone-lysine N-methyltransferase 2C, transcript variant X2	0	0	0	0	0	0	0	0	0	0	0	0	0	0	0	0
rna-XM_027290124.1	gene-LOC104918307	LOC104918307	histone-lysine N-methyltransferase 2C, transcript variant X3	0.37	0.42	0	0	0.35	0	0	0	0.13	0.31	0.14	0.15	0.263333	0.116667	0.043333	0.2
rna-XM_027290125.1	gene-LOC104918307	LOC104918307	histone-lysine N-methyltransferase 2C, transcript variant X4	0.31	0.09	0.77	1.34	1.64	1.24	0.55	0.4	0.47	0.92	0.46	0.94	0.39	1.40667	0.473333	0.773333
rna-XM_027290132.1	gene-LOC104918307	LOC104918307	histone-lysine N-methyltransferase 2C, transcript variant X5	1.46	2.2	1.74	1.88	0.91	1.82	2.1	1.42	2.26	2.09	2.43	2.06	1.8	1.53667	1.92667	2.19333
rna-XM_027290137.1	gene-LOC104918307	LOC104918307	histone-lysine N-methyltransferase 2C, transcript variant X6	0	0.1	0.12	0.16	0	0	0.33	0.23	0	0.17	0	0.12	0.073333	0.053333	0.186667	0.096667
rna-XM_027290142.1	gene-LOC104918307	LOC104918307	histone-lysine N-methyltransferase 2C, transcript variant X7	0.83	0.87	0.7	0.24	0.61	0.94	0.4	1.51	0.47	0.52	0.49	0.75	0.8	0.596667	0.793333	0.586667
rna-XM_027290146.1	gene-LOC104918307	LOC104918307	histone-lysine N-methyltransferase 2C, transcript variant X8	2.33	1.11	2.55	1.8	2.04	1.05	2.05	1.66	1.62	0.86	1.58	1.04	1.99667	1.63	1.77667	1.16
rna-XM_027290148.1	gene-LOC104918307	LOC104918307	histone-lysine N-methyltransferase 2C, transcript variant X9	0	0	0	0	0	0	0	0	0	0	0	0	0	0	0	0
rna-XM_010730020.3	gene-LOC104918310	LOC104918310	histamine H3 receptor	0	0	0	0	0	0	0	0	0	0	0	0	0	0	0	0
rna-XM_010730036.3	gene-LOC104918318	LOC104918318	cofilin-2	1126.38	1039.05	908.72	888.72	915.96	999.66	894.73	1044.55	1037.99	959.69	1099.45	793.06	1024.72	934.78	992.423	950.733
rna-XM_010730043.3	gene-LOC104918326	LOC104918326	notum, palmitoleoyl-protein carboxylesterase	0	0	0	0	0	0	0	0	0.02	0	0	0	0	0	0.006667	0
rna-XM_010730048.3	gene-LOC104918327	LOC104918327	calpain-2 catalytic subunit, transcript variant X2	0.21	0.07	0.27	0.14	0.09	0	0.24	0	0.04	0.1	0.24	0.22	0.183333	0.076667	0.093333	0.186667
rna-XM_027278124.1	gene-LOC104918327	LOC104918327	calpain-2 catalytic subunit, transcript variant X1	0	0	0	0	0	0	0	0	0	0	0	0	0	0	0	0
rna-XM_010730045.3	gene-LOC104918329	LOC104918329	pyrroline-5-carboxylate reductase 1, mitochondrial, transcript variant X1	11.62	10.38	10.91	7.24	8.04	8.11	10.89	7.81	9.3	11.51	7.57	5.66	10.97	7.79667	9.33333	8.24667
rna-XM_010730046.3	gene-LOC104918329	LOC104918329	pyrroline-5-carboxylate reductase 1, mitochondrial, transcript variant X4	0.27	0.3	0.52	0.58	0	1.35	0	0.55	0.64	0.98	0	1.05	0.363333	0.643333	0.396667	0.676667
rna-XM_010730047.3	gene-LOC104918329	LOC104918329	pyrroline-5-carboxylate reductase 1, mitochondrial, transcript variant X2	0.65	2.71	1.87	1.6	3.03	1.08	2.02	1.48	2.67	1.08	1.22	1.73	1.74333	1.90333	2.05667	1.34333
rna-XM_010730049.3	gene-LOC104918329	LOC104918329	pyrroline-5-carboxylate reductase 1, mitochondrial, transcript variant X3	0.84	0	0.82	0.76	0.85	0.6	1.28	0.8	0.51	1.01	0.67	1.21	0.553333	0.736667	0.863333	0.963333
rna-XM_027284973.1	gene-LOC104918329	LOC104918329	pyrroline-5-carboxylate reductase 1, mitochondrial, transcript variant X5	0	0	0	0	0	0	0	0	0	0	0	0	0	0	0	0
rna-XM_027284974.1	gene-LOC104918329	LOC104918329	pyrroline-5-carboxylate reductase 1, mitochondrial, transcript variant X6	0	0	0.28	0	0	0	0	0	0	0	0	0	0.093333	0	0	0
rna-XM_010730050.3	gene-LOC104918330	LOC104918330	transcription factor MafG, transcript variant X4	1.67	1.17	1.32	1.36	1.65	1.72	0.95	1.81	1.31	1.05	1.45	1.11	1.38667	1.57667	1.35667	1.20333
rna-XM_019261148.2	gene-LOC104918330	LOC104918330	transcription factor MafG, transcript variant X6	0.1	0	0	0	0	0	0.3	0	0.06	0.12	0.12	0.05	0.033333	0	0.12	0.096667
rna-XM_027285619.1	gene-LOC104918330	LOC104918330	transcription factor MafG, transcript variant X1	0.05	0	0.12	0.06	0.06	0	0.14	0	0	0	0	0.19	0.056667	0.04	0.046667	0.063333
rna-XM_027285620.1	gene-LOC104918330	LOC104918330	transcription factor MafG, transcript variant X2	0	0.11	0	0	0	0	0.06	0.14	0	0.1	0	0	0.036667	0	0.066667	0.033333
rna-XM_027285621.1	gene-LOC104918330	LOC104918330	transcription factor MafG, transcript variant X3	0	0	0	0	0	0	0	0	0	0	0	0	0	0	0	0
rna-XM_027285622.1	gene-LOC104918330	LOC104918330	transcription factor MafG, transcript variant X5	0	0	0	0	0	0	0	0	0	0	0	0.1	0	0	0	0.033333
rna-XM_027285623.1	gene-LOC104918330	LOC104918330	transcription factor MafG, transcript variant X7	0	0	0	0	0	0	0	0	0	0.18	0	0	0	0	0	0.06
rna-XM_010730051.3	gene-LOC104918331	LOC104918331	ethanolamine-phosphate cytidylyltransferase, transcript variant X3	0	0	0.17	0	0.22	0.17	0.22	0.27	0.1	0	0	0	0.056667	0.13	0.196667	0
rna-XM_019261061.2	gene-LOC104918331	LOC104918331	ethanolamine-phosphate cytidylyltransferase, transcript variant X1	0	0	0	0	0	0	0	0	0	0	0	0.17	0	0	0	0.056667
rna-XM_027284774.1	gene-LOC104918331	LOC104918331	ethanolamine-phosphate cytidylyltransferase, transcript variant X2	0.16	0.06	0	0.25	0	0	0	0.05	0	0.11	0.31	0	0.073333	0.083333	0.016667	0.14
rna-XM_010730052.3	gene-LOC104918332	LOC104918332	guanine nucleotide-binding protein G(o) subunit alpha	0	0	0	0.05	0	0	0	0	0.31	0	0	0	0	0.016667	0.103333	0
rna-XM_010730053.3	gene-LOC104918333	LOC104918333	neuropeptide B	0.15	0.14	0.14	0.27	0.34	0.33	0.27	0.44	0.06	0.21	0.14	0.25	0.143333	0.313333	0.256667	0.2
rna-XM_010730054.3	gene-LOC104918334	LOC104918334	transcription factor Sox-9	0.74	0.53	0.52	0.69	1.31	1.08	0.67	0.4	0.47	0.77	1	0.71	0.596667	1.02667	0.513333	0.826667
rna-XR_002042071.2	gene-LOC104918335	LOC104918335	uncharacterized LOC104918335, transcript variant X2	0	0.04	0	0	0	0.03	0	0	0	0	0	0	0.013333	0.01	0	0
rna-XR_797003.3	gene-LOC104918335	LOC104918335	uncharacterized LOC104918335, transcript variant X1	0	0.03	0.07	0.14	0	0.03	0.07	0	0.2	0.29	0.43	0	0.033333	0.056667	0.09	0.24
rna-XM_010730055.3	gene-LOC104918336	LOC104918336	somatostatin receptor type 2	0	0	0	0	0	0	0	0	0	0	0	0	0	0	0	0
rna-XM_019266216.2	gene-LOC104918337	LOC104918337	calpain-2 catalytic subunit	0	0.05	0	0.1	0.03	0	0	0	0.07	0	0	0.02	0.016667	0.043333	0.023333	0.006667
rna-XM_027285200.1	gene-LOC104918338	LOC104918338	ubiquitin carboxyl-terminal hydrolase 22, transcript variant X1	3.07	1.43	1.41	2.07	1.71	1.89	1.32	2.3	2.42	2.31	1.73	1.49	1.97	1.89	2.01333	1.84333
rna-XM_027285201.1	gene-LOC104918338	LOC104918338	ubiquitin carboxyl-terminal hydrolase 22, transcript variant X2	0.4	1.81	1.75	1.51	2.1	1.1	1.81	1.52	0.53	0.88	1.69	1.52	1.32	1.57	1.28667	1.36333
rna-XM_010730060.3	gene-LOC104918340	LOC104918340	transcription factor 24	0	0.06	0	0.28	0	0.19	0	0.06	0.08	0.16	0.06	0	0.02	0.156667	0.046667	0.073333
rna-XM_019261072.2	gene-LOC104918342	LOC104918342	B-cell receptor CD22, transcript variant X2	0	0.31	0.46	0.09	0.41	0.28	0.16	0.22	0.13	0.35	0.19	0.25	0.256667	0.26	0.17	0.263333
rna-XM_027284918.1	gene-LOC104918342	LOC104918342	B-cell receptor CD22, transcript variant X1	0.18	0	0	0	0	0	0	0	0	0	0	0	0.06	0	0	0
rna-XM_027284919.1	gene-LOC104918342	LOC104918342	B-cell receptor CD22, transcript variant X3	0	0	0.34	0	0.25	0.21	0	0.01	0.4	0.09	0.05	0.17	0.113333	0.153333	0.136667	0.103333
rna-XM_019261094.2	gene-LOC104918343	LOC104918343	E3 ubiquitin-protein ligase rnf213-alpha	65.39	86.63	105.8	47.18	77.77	81.28	78.54	71.22	51.68	75.15	67.26	77.9	85.94	68.7433	67.1467	73.4367
rna-XM_010730064.3	gene-LOC104918344	LOC104918344	dexamethasone-induced Ras-related protein 1	0	0	0	0	0	0.05	0	0	0	0	0	0	0	0.016667	0	0
rna-XM_010730066.3	gene-LOC104918346	LOC104918346	uncharacterized LOC104918346, transcript variant X1	1.09	0.97	0.5	1.78	0.82	1.53	1.33	0.88	1.05	1.63	0.79	1.24	0.853333	1.37667	1.08667	1.22
rna-XM_019256674.2	gene-LOC104918346	LOC104918346	uncharacterized LOC104918346, transcript variant X2	0	0.1	0.07	0	0	0	0	0.16	0	0	0.16	0	0.056667	0	0.053333	0.053333
rna-XM_019266030.2	gene-LOC104918346	LOC104918346	uncharacterized LOC104918346, transcript variant X3	0	0	0.23	0.08	0	0	0	0	0.11	0	0.17	0.08	0.076667	0.026667	0.036667	0.083333
rna-XM_027288349.1	gene-LOC104918346	LOC104918346	uncharacterized LOC104918346, transcript variant X4	0	0	0.07	0	0	0	0	0	0	0	0.16	0	0.023333	0	0	0.053333
rna-XM_019266300.2	gene-LOC104918347	LOC104918347	calpain-1 catalytic subunit, transcript variant X1	1.62	0.83	1.23	1.65	1.46	1.89	1.13	1.18	1.8	1.8	1.95	0.8	1.22667	1.66667	1.37	1.51667
rna-XM_019266301.2	gene-LOC104918347	LOC104918347	calpain-1 catalytic subunit, transcript variant X2	0.56	0.72	0.38	0.62	0	0	0.65	0.79	0.48	0	0.94	0.74	0.553333	0.206667	0.64	0.56
rna-XM_019270866.2	gene-LOC104918352	LOC104918352	rho-related GTP-binding protein RhoA-B	46.14	48.31	54.15	56.93	48.74	46.74	52.74	51.52	62.91	60.32	57.51	56.75	49.5333	50.8033	55.7233	58.1933
rna-XM_010730075.3	gene-LOC104918354	LOC104918354	helicase ARIP4, transcript variant X3	1.48	0.73	2.24	1.07	0.76	2.68	2	0.52	1.17	0.8	1.45	0.35	1.48333	1.50333	1.23	0.866667
rna-XM_019270871.2	gene-LOC104918354	LOC104918354	helicase ARIP4, transcript variant X1	0	0.35	0	0.11	0.18	0	0.34	0	0.78	0.25	0.15	0.32	0.116667	0.096667	0.373333	0.24
rna-XM_019270873.2	gene-LOC104918354	LOC104918354	helicase ARIP4, transcript variant X4	1.36	1.13	0.39	1.35	1.26	0.57	1.07	1.93	0.93	1.23	0.94	1.37	0.96	1.06	1.31	1.18
rna-XM_027288992.1	gene-LOC104918354	LOC104918354	helicase ARIP4, transcript variant X2	0.13	0	0	0	0	0	0	0	0	0.13	0	0	0.043333	0	0	0.043333
rna-XM_010730076.3	gene-LOC104918355	LOC104918355	oxysterol-binding protein-related protein 2	4.53	6.85	4.23	4.5	7.43	7.59	4.7	5.02	5.1	5.94	6.54	3.75	5.20333	6.50667	4.94	5.41
rna-XM_010730080.3	gene-LOC104918358	LOC104918358	hyaluronidase-2	0	0.03	0	0	0	0	0	0	0	0	0	0	0.01	0	0	0
rna-XM_019270874.2	gene-LOC104918359	LOC104918359	semaphorin-3A, transcript variant X2	0	0	0	0	0	0	0	0	0	0	0	0	0	0	0	0
rna-XM_019270875.2	gene-LOC104918359	LOC104918359	semaphorin-3A, transcript variant X4	0.08	0	0	0	0.04	0	0	0	0	0	0.23	0	0.026667	0.013333	0	0.076667
rna-XM_027288994.1	gene-LOC104918359	LOC104918359	semaphorin-3A, transcript variant X1	0	0	0	0	0	0	0	0	0	0	0	0	0	0	0	0
rna-XM_027288995.1	gene-LOC104918359	LOC104918359	semaphorin-3A, transcript variant X3	0	0	0	0	0	0.2	0	0.03	0.16	0	0	0.39	0	0.066667	0.063333	0.13
rna-XM_027288988.1	gene-LOC104918360	LOC104918360	protein bassoon, transcript variant X1	0	0	0	0	0	0	0	0	0	0	0	0	0	0	0	0
rna-XM_027288989.1	gene-LOC104918360	LOC104918360	protein bassoon, transcript variant X2	0	0	0	0	0	0	0	0	0	0	0	0	0	0	0	0
rna-XM_027288990.1	gene-LOC104918360	LOC104918360	protein bassoon, transcript variant X3	0	0	0.02	0	0.01	0.01	0	0.01	0.02	0.01	0.01	0	0.006667	0.006667	0.01	0.006667
rna-XM_027288991.1	gene-LOC104918360	LOC104918360	protein bassoon, transcript variant X4	0	0	0	0.01	0	0	0.02	0	0	0	0	0	0	0.003333	0.006667	0
rna-XM_019258146.2	gene-LOC104918362	LOC104918362	putative helicase mov-10-B.1	12.67	11.29	10.13	11.63	9.52	9.23	10.89	9	11.74	10.96	11.11	9.43	11.3633	10.1267	10.5433	10.5
rna-XM_010730086.3	gene-LOC104918363	LOC104918363	rho-related GTP-binding protein RhoA-D	15.16	15.98	19.07	25.16	20.51	26.52	23.31	21.38	24.46	28.39	25.82	21.77	16.7367	24.0633	23.05	25.3267
rna-XM_010730087.3	gene-LOC104918364	LOC104918364	protein phosphatase 1H	21.86	28.89	27.92	25.87	33.84	25.76	23.84	20.93	22.28	25.39	28.92	29.29	26.2233	28.49	22.35	27.8667
rna-XM_010730088.3	gene-LOC104918365	LOC104918365	protein FAM19A2, transcript variant X1	0.1	0	0.33	0.07	0.14	0.09	0.26	0.39	0.09	0.33	0.66	0.08	0.143333	0.1	0.246667	0.356667
rna-XM_019258157.2	gene-LOC104918365	LOC104918365	protein FAM19A2, transcript variant X2	0.43	0	0.1	0.21	0.32	0.55	0.09	0	0	0	0	0	0.176667	0.36	0.03	0
rna-XM_027278864.1	gene-LOC104918365	LOC104918365	protein FAM19A2, transcript variant X3	0	0.14	0	0	0	0	0	0	0	0	0	0.27	0.046667	0	0	0.09
rna-XM_027278865.1	gene-LOC104918365	LOC104918365	protein FAM19A2, transcript variant X4	0	0.14	0	0	0	0	0	0	0.35	0.1	0	0	0.046667	0	0.116667	0.033333
rna-XM_010730089.3	gene-LOC104918366	LOC104918366	monocarboxylate transporter 1-like	0	0	0	0	0	0	0	0	0	0	0	0	0	0	0	0
rna-XM_010730094.3	gene-LOC104918368	LOC104918368	integumentary mucin A.1, transcript variant X3	0	0	0	0	0	0	0	0	0	0	0	0	0	0	0	0
rna-XM_010730095.3	gene-LOC104918368	LOC104918368	integumentary mucin A.1, transcript variant X2	0	0	0	0	0	0	0	0	0	0	0	0	0	0	0	0
rna-XM_010730096.3	gene-LOC104918368	LOC104918368	integumentary mucin A.1, transcript variant X5	0	0	0	0	0	0	0	0	0	0	0	0	0	0	0	0
rna-XM_019258160.2	gene-LOC104918368	LOC104918368	integumentary mucin A.1, transcript variant X4	0	0	0	0	0	0	0	0	0	0	0	0	0	0	0	0
rna-XM_027279603.1	gene-LOC104918368	LOC104918368	integumentary mucin A.1, transcript variant X1	0	0	0	0	0	0	0	0	0	0	0	0	0	0	0	0
rna-XM_010730097.3	gene-LOC104918370	LOC104918370	sodium-coupled monocarboxylate transporter 1	0.4	0.52	0.63	0.38	0.19	1.34	0.36	0.69	0.46	0.16	0.44	0.32	0.516667	0.636667	0.503333	0.306667
rna-XM_027279605.1	gene-LOC104918371	LOC104918371	thyrotropin subunit beta, transcript variant X1	0.16	0.05	0	0.29	0.07	0.08	0.07	0.16	0.2	0	0	0.68	0.07	0.146667	0.143333	0.226667
rna-XM_027279606.1	gene-LOC104918371	LOC104918371	thyrotropin subunit beta, transcript variant X2	0	0.05	0.34	0.07	0.16	0.23	0	0.09	0	0.25	0.25	0.07	0.13	0.153333	0.03	0.19
rna-XM_010730100.3	gene-LOC104918372	LOC104918372	mitochondrial glutamate carrier 1	30.05	27.64	28.85	29.65	32.6	33.57	25.64	26.89	30.92	30.09	27.78	29.63	28.8467	31.94	27.8167	29.1667
rna-XM_010730101.3	gene-LOC104918373	LOC104918373	CD9 antigen, transcript variant X2	12.72	10.58	10.61	8.85	8.5	6.72	11.85	11.72	14.96	9.23	9.71	11.96	11.3033	8.02333	12.8433	10.3
rna-XM_010730102.3	gene-LOC104918373	LOC104918373	CD9 antigen, transcript variant X1	11.66	5.23	7.56	3.17	3.97	4.3	6.47	6.78	9.57	3.67	5.6	4.59	8.15	3.81333	7.60667	4.62
rna-XM_010730105.3	gene-LOC104918375	LOC104918375	potassium voltage-gated channel subfamily A member 3	0	0	0	0	0	0	0	0	0	0	0	0	0	0	0	0
rna-XM_019258140.2	gene-LOC104918376	LOC104918376	potassium voltage-gated channel subfamily A member 2	0	0	0	0	0	0	0	0	0	0	0	0	0	0	0	0
rna-XM_010730110.3	gene-LOC104918377	LOC104918377	CSC1-like protein 2, transcript variant X1	7.92	6.72	7.6	8.07	7.23	6.28	6.42	5.74	6.63	7.17	7.61	9.71	7.41333	7.19333	6.26333	8.16333
rna-XM_010730127.3	gene-LOC104918377	LOC104918377	CSC1-like protein 2, transcript variant X2	0.31	0.62	1.58	1.42	0.96	0.73	0	0.7	1.84	0	0	1.02	0.836667	1.03667	0.846667	0.34
rna-XM_010730136.3	gene-LOC104918377	LOC104918377	CSC1-like protein 2, transcript variant X3	0.62	0.61	1.33	0.6	0.21	0.82	0	0.46	0.18	0.34	0	0.49	0.853333	0.543333	0.213333	0.276667
rna-XM_010730144.3	gene-LOC104918377	LOC104918377	CSC1-like protein 2, transcript variant X4	0	0.76	0	0.6	0	0	0.43	0.37	0	0	0	0	0.253333	0.2	0.266667	0
rna-XM_010730107.3	gene-LOC104918378	LOC104918378	potassium voltage-gated channel subfamily A member 10	0	0.05	0.02	0.03	0	0.02	0	0	0.02	0	0	0.02	0.023333	0.016667	0.006667	0.006667
rna-XM_027278830.1	gene-LOC104918379	LOC104918379	uncharacterized LOC104918379	11.53	10.92	10.97	8.32	12.47	9.58	8.89	9.63	8.37	9.7	10.55	9.81	11.14	10.1233	8.96333	10.02
rna-XM_010730111.3	gene-LOC104918380	LOC104918380	60S acidic ribosomal protein P2	2556.11	2219.89	2213.71	2212.56	2114.59	2485.92	2364.84	2622.35	2559	2475.77	2443.95	1880.16	2329.9	2271.02	2515.4	2266.63
rna-XM_010730112.3	gene-LOC104918381	LOC104918381	adenosine receptor A1, transcript variant X1	0.94	0.71	0.84	0.72	0.35	0.64	0.92	0.59	0.67	0.19	0.2	0.41	0.83	0.57	0.726667	0.266667
rna-XR_003462420.1	gene-LOC104918381	LOC104918381	adenosine receptor A1, transcript variant X2	0	0	0.63	0.24	0	0	0	0	0.16	0.21	0.23	0.23	0.21	0.08	0.053333	0.223333
rna-XM_019258153.2	gene-LOC104918382	LOC104918382	tubby-related protein 1	0.25	0.29	0.68	0.42	0.37	0.19	0.49	0.61	0.48	0.44	0.56	0.31	0.406667	0.326667	0.526667	0.436667
rna-XM_027279553.1	gene-LOC104918383	LOC104918383	transcriptional enhancer factor TEF-5	0	0	0	0.22	0	0.17	0	0	0	0	0	0	0	0.13	0	0
rna-XM_027279535.1	gene-LOC104918385	LOC104918385	plakophilin-1, transcript variant X1	0	0	0	0	0.02	0.13	0.04	0	0.02	0	0	0	0	0.05	0.02	0
rna-XM_027279536.1	gene-LOC104918385	LOC104918385	plakophilin-1, transcript variant X2	0	0	0	0	0	0	0	0	0	0	0	0	0	0	0	0
rna-XM_027279537.1	gene-LOC104918385	LOC104918385	plakophilin-1, transcript variant X3	0	0	0	0	0	0	0	0	0	0	0	0	0	0	0	0
rna-XM_027279538.1	gene-LOC104918385	LOC104918385	plakophilin-1, transcript variant X4	0	0	0.1	0	0	0	0	0	0	0	0	0.05	0.033333	0	0	0.016667
rna-XM_010730119.3	gene-LOC104918386	LOC104918386	troponin T, cardiac muscle isoforms, transcript variant X2	0	0	0	0	0	0	0	0	0	0	0.06	0	0	0	0	0.02
rna-XM_019272675.2	gene-LOC104918386	LOC104918386	troponin T, cardiac muscle isoforms, transcript variant X1	0	0	0	0	0	0	0	0	0	0	0	0	0	0	0	0
rna-XM_019272676.2	gene-LOC104918386	LOC104918386	troponin T, cardiac muscle isoforms, transcript variant X3	0	0	0	0	0	0	0	0	0	0	0	0	0	0	0	0
rna-XM_019272677.2	gene-LOC104918386	LOC104918386	troponin T, cardiac muscle isoforms, transcript variant X4	0	0	0	0	0	0	0	0	0	0	0	0	0	0	0	0
rna-XM_019272678.2	gene-LOC104918386	LOC104918386	troponin T, cardiac muscle isoforms, transcript variant X5	0	0	0	0	0	0	0	0	0	0	0	0	0	0	0	0
rna-XM_027279106.1	gene-LOC104918387	LOC104918387	troponin I, slow skeletal muscle	0.22	0	0	0.13	0.2	0	0.07	0	0.13	0	0	0.12	0.073333	0.11	0.066667	0.04
rna-XM_010730121.3	gene-LOC104918388	LOC104918388	cysteine and glycine-rich protein 1	45.31	49.46	38.32	33.99	30.23	53.83	32.28	59.28	63.44	48.46	38.62	31.37	44.3633	39.35	51.6667	39.4833
rna-XM_010730128.3	gene-LOC104918390	LOC104918390	myosin-binding protein H, transcript variant X3	0.94	0.94	1.3	0.4	1.1	0.55	0	0.85	0.77	0.35	0.36	2.32	1.06	0.683333	0.54	1.01
rna-XM_010730129.3	gene-LOC104918390	LOC104918390	myosin-binding protein H, transcript variant X4	0	0.54	0	0	0	0.18	0.29	0.19	0	0	0.23	0.34	0.18	0.06	0.16	0.19
rna-XM_027279099.1	gene-LOC104918390	LOC104918390	myosin-binding protein H, transcript variant X1	0	0	0	0	0.2	0	0	0	0	0	0	0	0	0.066667	0	0
rna-XM_027279100.1	gene-LOC104918390	LOC104918390	myosin-binding protein H, transcript variant X2	0	0	0	0	0	0	0	0	0	0	0	0	0	0	0	0
rna-XM_027279102.1	gene-LOC104918391	LOC104918391	synaptotagmin-2, transcript variant X1	0.59	0.84	0	1.35	0.43	2.09	0.79	0.71	1.48	1.59	0.8	1.38	0.476667	1.29	0.993333	1.25667
rna-XM_027279103.1	gene-LOC104918391	LOC104918391	synaptotagmin-2, transcript variant X2	0	0	0	0	0	0	0	0	0	0	0	0	0	0	0	0
rna-XM_027279104.1	gene-LOC104918391	LOC104918391	synaptotagmin-2, transcript variant X3	0	0.22	0	0.21	0.19	0	0	0	0	0	0	0.13	0.073333	0.133333	0	0.043333
rna-XM_027279105.1	gene-LOC104918391	LOC104918391	synaptotagmin-2, transcript variant X4	0	0	1.25	0	0	0	0	0	0	0	0	0	0.416667	0	0	0
rna-XM_010730131.3	gene-LOC104918392	LOC104918392	protein phosphatase 1 regulatory subunit 12B, transcript variant X1	2.63	0.88	0.58	1.78	2.65	3.08	1.64	2.71	2.57	1.7	1.15	2.43	1.36333	2.50333	2.30667	1.76
rna-XM_010730132.3	gene-LOC104918392	LOC104918392	protein phosphatase 1 regulatory subunit 12B, transcript variant X2	0.98	0.62	0.39	0.14	1.75	1.19	0.52	1.43	1.85	0.93	1.05	0.7	0.663333	1.02667	1.26667	0.893333
rna-XM_019272620.2	gene-LOC104918393	LOC104918393	immunoglobulin-like and fibronectin type III domain-containing protein 1, transcript variant X1	0	0	0	0	0	0	0	0	0	0	0	0	0	0	0	0
rna-XM_027279095.1	gene-LOC104918393	LOC104918393	immunoglobulin-like and fibronectin type III domain-containing protein 1, transcript variant X2	0	0	0	0	0	0	0	0	0	0	0	0	0	0	0	0
rna-XM_027279096.1	gene-LOC104918393	LOC104918393	immunoglobulin-like and fibronectin type III domain-containing protein 1, transcript variant X3	0	0	0	0	0	0	0	0	0	0	0	0	0	0	0	0
rna-XM_010730135.3	gene-LOC104918395	LOC104918395	immunoglobulin-like and fibronectin type III domain-containing protein 1, transcript variant X2	0	0	0	0	0	0	0	0	0	0	0	0	0	0	0	0
rna-XM_019272633.2	gene-LOC104918395	LOC104918395	immunoglobulin-like and fibronectin type III domain-containing protein 1, transcript variant X3	0	0	0	0	0	0	0	0	0	0	0	0	0	0	0	0
rna-XM_019272634.2	gene-LOC104918395	LOC104918395	immunoglobulin-like and fibronectin type III domain-containing protein 1, transcript variant X1	0	0	0	0	0	0	0	0	0	0	0	0	0	0	0	0
rna-XM_019272624.2	gene-LOC104918396	LOC104918396	immunoglobulin-like and fibronectin type III domain-containing protein 1, transcript variant X1	0	0	0	0	0	0	0	0	0	0	0	0	0	0	0	0
rna-XM_027279094.1	gene-LOC104918396	LOC104918396	immunoglobulin-like and fibronectin type III domain-containing protein 1, transcript variant X2	0	0	0	0	0	0	0	0	0	0	0	0	0	0	0	0
rna-XM_027279092.1	gene-LOC104918397	LOC104918397	immunoglobulin-like and fibronectin type III domain-containing protein 1, transcript variant X1	0	0	0	0	0	0	0	0	0	0	0	0	0	0	0	0
rna-XM_027279093.1	gene-LOC104918397	LOC104918397	immunoglobulin-like and fibronectin type III domain-containing protein 1, transcript variant X2	0	0	0	0.01	0.01	0	0	0	0	0	0	0	0	0.006667	0	0
rna-XM_010730141.3	gene-LOC104918399	LOC104918399	myelin basic protein, transcript variant X3	0	0	0	0	0	0	0	0	0	0	0	0	0	0	0	0
rna-XM_010730142.3	gene-LOC104918399	LOC104918399	myelin basic protein, transcript variant X4	0.22	0	0.17	0.23	0.56	0.51	0.33	0.28	0.38	0	0.52	0	0.13	0.433333	0.33	0.173333
rna-XM_019264931.2	gene-LOC104918399	LOC104918399	myelin basic protein, transcript variant X1	0	0.65	0	0	0	0	0	0	0	0.2	0	0.41	0.216667	0	0	0.203333
rna-XM_019264932.2	gene-LOC104918399	LOC104918399	myelin basic protein, transcript variant X2	0	0	0	0	0	0	0	0	0	0	0	0	0	0	0	0
rna-XM_027286828.1	gene-LOC104918405	LOC104918405	glutamate receptor ionotropic, kainate 2, transcript variant X1	0	0	0	0	0	0	0	0	0	0	0	0	0	0	0	0
rna-XM_027286829.1	gene-LOC104918405	LOC104918405	glutamate receptor ionotropic, kainate 2, transcript variant X2	0	0	0	0	0	0	0	0	0	0	0	0	0	0	0	0
rna-XM_027286830.1	gene-LOC104918405	LOC104918405	glutamate receptor ionotropic, kainate 2, transcript variant X3	0	0.01	0	0	0	0.05	0	0.01	0.02	0.03	0	0.01	0.003333	0.016667	0.01	0.013333
rna-XM_027286831.1	gene-LOC104918405	LOC104918405	glutamate receptor ionotropic, kainate 2, transcript variant X4	0.02	0	0	0	0.02	0	0	0	0	0	0.04	0	0.006667	0.006667	0	0.013333
rna-XM_010730156.3	gene-LOC104918407	LOC104918407	zinc transporter ZIP9	0.25	0.08	0.18	0.25	0.1	0.29	0.41	0.16	0.14	0.23	0.21	0.28	0.17	0.213333	0.236667	0.24
rna-XM_010730158.3	gene-LOC104918411	LOC104918411	uncharacterized LOC104918411	0.34	0.31	0.11	0	0.1	0.19	0.3	0.11	1.81	0	0	0.19	0.253333	0.096667	0.74	0.063333
rna-XR_797004.3	gene-LOC104918413	LOC104918413	uncharacterized LOC104918413	0.29	0.52	0	0.25	0	0	0.26	0.27	0.24	0.27	1.09	0	0.27	0.083333	0.256667	0.453333
rna-XM_010730166.3	gene-LOC104918419	LOC104918419	transmembrane protein 59	0.44	0.32	0.55	0.41	0.39	0.43	0.53	0.45	0.5	0.7	0.58	0.27	0.436667	0.41	0.493333	0.516667
rna-XM_010730169.3	gene-LOC104918421	LOC104918421	protein FAM78B	0.01	0	0	0	0	0	0.03	0	0	0	0	0	0.003333	0	0.01	0
rna-XM_010730171.3	gene-LOC104918423	LOC104918423	neurogenic locus notch homolog protein 2	14.78	13.73	13.71	14.8	16.52	15.92	14.96	14.56	13.92	15.23	16.53	14.42	14.0733	15.7467	14.48	15.3933
rna-XM_010730176.3	gene-LOC104918427	LOC104918427	ER degradation-enhancing alpha-mannosidase-like protein 3, transcript variant X1	0.3	0.49	0.81	0	0.65	0.28	0.14	0	0	1.2	0.36	0.52	0.533333	0.31	0.046667	0.693333
rna-XM_010730178.3	gene-LOC104918427	LOC104918427	ER degradation-enhancing alpha-mannosidase-like protein 3, transcript variant X2	5.84	4.8	5.06	2.95	4.77	1.8	1.93	3.73	7.22	5.13	3	5.03	5.23333	3.17333	4.29333	4.38667
rna-XM_010730183.3	gene-LOC104918428	LOC104918428	uncharacterized protein C1orf21 homolog, transcript variant X3	0	0.4	0	0	0	0	0	0	0	0	0.22	0	0.133333	0	0	0.073333
rna-XM_019270275.2	gene-LOC104918428	LOC104918428	uncharacterized protein C1orf21 homolog, transcript variant X2	0.42	0	0.07	0.27	0.08	0.07	0.12	0.08	0.08	0.33	0	0.12	0.163333	0.14	0.093333	0.15
rna-XM_027289915.1	gene-LOC104918428	LOC104918428	uncharacterized protein C1orf21 homolog, transcript variant X1	5.69	4.42	5.83	5.35	2.94	4.81	6.79	3.83	2.74	2.63	4.87	3.14	5.31333	4.36667	4.45333	3.54667
rna-XM_027289914.1	gene-LOC104918429	LOC104918429	procollagen galactosyltransferase 2	1.17	0.57	2.32	1.59	0.58	1.76	1.23	1.21	1.13	0.77	0.56	2.36	1.35333	1.31	1.19	1.23
rna-XM_010730186.3	gene-LOC104918431	LOC104918431	alpha/beta hydrolase domain-containing protein 17A	8.92	7.4	9.26	8.68	8.79	9.27	8.53	8.13	8.48	9.17	7.07	7.61	8.52667	8.91333	8.38	7.95
rna-XM_010730188.3	gene-LOC104918432	LOC104918432	AN1-type zinc finger protein 5, transcript variant X1	19.74	19.86	20.42	18.53	18.72	19.32	18.76	20.01	20.17	19.58	20.64	19.2	20.0067	18.8567	19.6467	19.8067
rna-XM_027289887.1	gene-LOC104918432	LOC104918432	AN1-type zinc finger protein 5, transcript variant X2	0	0	0	0.75	0.66	0	0	0	0	0.97	0.3	0	0	0.47	0	0.423333
rna-XM_010730193.3	gene-LOC104918433	LOC104918433	perilipin-3, transcript variant X2	4.21	4.2	4.68	5.19	5.06	3.57	4.38	3.36	3.29	3.05	4.16	5.91	4.36333	4.60667	3.67667	4.37333
rna-XM_027289886.1	gene-LOC104918433	LOC104918433	perilipin-3, transcript variant X1	2.57	3	1.31	1.75	3.28	6.36	2.5	4.29	4.82	4.5	8.41	4.74	2.29333	3.79667	3.87	5.88333
rna-XM_010730194.3	gene-LOC104918434	LOC104918434	nuclear receptor ROR-beta-like	2.38	2.09	2.16	3.08	2.49	4.35	1.97	2.12	2.08	2.38	2.44	1.94	2.21	3.30667	2.05667	2.25333
rna-XM_010730196.3	gene-LOC104918435	LOC104918435	endophilin-A2, transcript variant X2	9.67	10.7	11.18	11.71	12.14	11.08	10.2	8.96	9.57	13.58	10.16	10.28	10.5167	11.6433	9.57667	11.34
rna-XM_027290279.1	gene-LOC104918435	LOC104918435	endophilin-A2, transcript variant X1	0.54	0.67	0.65	0.39	0.31	0.8	0.11	0.37	0.59	0.4	0.28	0.57	0.62	0.5	0.356667	0.416667
rna-XM_010730199.3	gene-LOC104918436	LOC104918436	galectin-3-binding protein B	45.48	73.17	89.4	48.35	81.27	39.15	50.64	58.92	48.52	59.82	46.18	47.39	69.35	56.2567	52.6933	51.13
rna-XM_010730201.3	gene-LOC104918438	LOC104918438	elongation of very long chain fatty acids protein 4, transcript variant X1	11.92	14.09	12.52	7.26	12.33	11.38	8.96	9.45	11.53	11.05	10.75	16.24	12.8433	10.3233	9.98	12.68
rna-XM_019270272.2	gene-LOC104918438	LOC104918438	elongation of very long chain fatty acids protein 4, transcript variant X3	1.13	2.36	0.75	3.93	3.32	0	2.85	2.86	3.26	3.61	4.39	3.5	1.41333	2.41667	2.99	3.83333
rna-XM_019270273.2	gene-LOC104918438	LOC104918438	elongation of very long chain fatty acids protein 4, transcript variant X2	3.98	1.32	3.71	3.14	2.91	3.3	5.05	4.3	2.21	2.6	0.99	2.13	3.00333	3.11667	3.85333	1.90667
rna-XM_027290275.1	gene-LOC104918438	LOC104918438	elongation of very long chain fatty acids protein 4, transcript variant X4	1.14	0.63	0.18	0.18	0.82	0.37	0.76	0.59	0.66	0.45	0.32	0.73	0.65	0.456667	0.67	0.5
rna-XM_010730203.3	gene-LOC104918440	LOC104918440	single-stranded DNA-binding protein 3, transcript variant X1	1.22	0.76	0.62	2.45	1.93	0.54	0.8	0.79	1.53	2.12	0.46	1.33	0.866667	1.64	1.04	1.30333
rna-XM_010730204.3	gene-LOC104918440	LOC104918440	single-stranded DNA-binding protein 3, transcript variant X2	13.2	14.45	13.83	13.07	13.78	15.16	17.49	14.24	16.97	15.6	14.55	14.9	13.8267	14.0033	16.2333	15.0167
rna-XM_019270239.2	gene-LOC104918442	LOC104918442	serine/threonine-protein kinase TNNI3K	0	0	0	0.02	0.02	0.02	0.04	0	0.07	0.04	0.14	0.02	0	0.02	0.036667	0.066667
rna-XM_010730212.3	gene-LOC104918444	LOC104918444	elongation of very long chain fatty acids protein 1, transcript variant X2	105.98	107.51	113.78	132.61	134.12	107.74	107.9	112.33	109.91	133.45	158.59	139.87	109.09	124.823	110.047	143.97
rna-XM_027290330.1	gene-LOC104918444	LOC104918444	elongation of very long chain fatty acids protein 1, transcript variant X1	21.3	28	28.56	31.84	34.5	27.04	18.03	22.82	17.57	22.79	11.66	24.81	25.9533	31.1267	19.4733	19.7533
rna-XM_010730217.3	gene-LOC104918446	LOC104918446	urokinase plasminogen activator surface receptor-like	0	0	0	0	0	0	0	0	0	0	0	0	0	0	0	0
rna-XM_010730216.3	gene-LOC104918448	LOC104918448	diencephalon/mesencephalon homeobox protein 1-B	0	0	0	0	0	0	0	0	0	0	0	0	0	0	0	0
rna-XM_010730218.3	gene-LOC104918449	LOC104918449	cytochrome b-c1 complex subunit 6, mitochondrial	102.66	85.29	89.29	95.56	85.14	82.72	77.69	71.58	87.97	78.98	77.6	98.74	92.4133	87.8067	79.08	85.1067
rna-XM_010730219.3	gene-LOC104918450	LOC104918450	cytochrome P450 2J6	0.05	0.07	0	0.02	0	0.07	0.07	0	0	0	0.03	0	0.04	0.03	0.023333	0.01
rna-XM_010730220.3	gene-LOC104918451	LOC104918451	neurogenic locus notch homolog protein 1-like, transcript variant X3	0	0.12	0	0	0	0	0.16	0	0	0.21	0	0.08	0.04	0	0.053333	0.096667
rna-XM_027290441.1	gene-LOC104918451	LOC104918451	neurogenic locus notch homolog protein 1-like, transcript variant X1	0	0	0	0	0	0	0	0	0	0	0	0	0	0	0	0
rna-XM_027290442.1	gene-LOC104918451	LOC104918451	neurogenic locus notch homolog protein 1-like, transcript variant X2	0.21	0	0	0	0	0	0	0	0	0	0	0	0.07	0	0	0
rna-XM_027290443.1	gene-LOC104918451	LOC104918451	neurogenic locus notch homolog protein 1-like, transcript variant X4	0	0	0.09	0.27	0.09	0.18	0	0.07	0.15	0	0.15	0.27	0.03	0.18	0.073333	0.14
rna-XM_010730222.3	gene-LOC104918453	LOC104918453	chemokine XC receptor 1-like, transcript variant X1	23.72	32.61	31.83	37.16	38.66	28.81	21.46	22.71	23.14	23.18	19.31	21.44	29.3867	34.8767	22.4367	21.31
rna-XM_027290524.1	gene-LOC104918453	LOC104918453	chemokine XC receptor 1-like, transcript variant X2	0	0	0.3	0	0	0	0.2	0	1.39	0	0	0	0.1	0	0.53	0
rna-XM_010730225.3	gene-LOC104918456	LOC104918456	torsin-1A-interacting protein 2, transcript variant X1	21.79	20.06	20.99	19.73	22.27	18.38	21.22	17.57	19.17	19.23	19.02	18.48	20.9467	20.1267	19.32	18.91
rna-XM_010730226.3	gene-LOC104918456	LOC104918456	torsin-1A-interacting protein 2, transcript variant X2	1.21	2.15	2.11	2.25	4.51	2.08	2.73	3.75	1.9	3.5	3.3	3.9	1.82333	2.94667	2.79333	3.56667
rna-XM_019279565.2	gene-LOC104918458	LOC104918458	retinoic acid receptor RXR-gamma-B, transcript variant X4	0	0	0	0	0	1.13	2.61	0	0	1.77	0	3.32	0	0.376667	0.87	1.69667
rna-XM_019279566.2	gene-LOC104918458	LOC104918458	retinoic acid receptor RXR-gamma-B, transcript variant X1	0	0	0	0	0	0	0	0	0	0.12	0.12	0	0	0	0	0.08
rna-XM_027290521.1	gene-LOC104918458	LOC104918458	retinoic acid receptor RXR-gamma-B, transcript variant X2	0	0	0	0	0	0	0	0.66	0	0	0	0	0	0	0.22	0
rna-XM_027290522.1	gene-LOC104918458	LOC104918458	retinoic acid receptor RXR-gamma-B, transcript variant X3	0	0	0	0	0	0	0	0	0	0	0	0	0	0	0	0
rna-XM_027290523.1	gene-LOC104918458	LOC104918458	retinoic acid receptor RXR-gamma-B, transcript variant X5	3.17	1.45	1.92	2.1	2.39	0.46	0	2.56	2.63	0	1.45	0	2.18	1.65	1.73	0.483333
rna-XM_010730230.3	gene-LOC104918459	LOC104918459	LIM homeobox transcription factor 1-alpha	0	0	0	0	0.08	0.07	0.08	0.04	0.04	0	0	0	0	0.05	0.053333	0
rna-XM_010730236.3	gene-LOC104918463	LOC104918463	14 kDa phosphohistidine phosphatase	25.2	19.22	22.73	25.15	20.3	20.64	21.12	20.78	23.21	24.83	22.79	17.48	22.3833	22.03	21.7033	21.7
rna-XM_010730241.3	gene-LOC104918467	LOC104918467	leupaxin	88.54	86.59	74.88	58.24	79.75	68.2	67.59	71.65	70.83	70.77	72.25	70.54	83.3367	68.73	70.0233	71.1867
rna-XM_019279549.2	gene-LOC104918468	LOC104918468	metalloprotease TIKI2	0.14	0.07	0.03	0.19	0.24	0.21	0.05	0.16	0.44	0.13	0.36	0.02	0.08	0.213333	0.216667	0.17
rna-XM_010730243.3	gene-LOC104918470	LOC104918470	forkhead box protein D2	0	0	0	0.07	0	0.1	0	0	0	0	0.04	0	0	0.056667	0	0.013333
rna-XM_010730244.3	gene-LOC104918471	LOC104918471	forkhead box protein E4	0	0	0	0	0	0	0	0	0	0	0	0	0	0	0	0
rna-XM_010730248.3	gene-LOC104918474	LOC104918474	cyclin-dependent kinases regulatory subunit 1	10.97	11.25	8.42	10.13	10.26	9.63	8.77	10.14	10.24	13.1	9.92	12.52	10.2133	10.0067	9.71667	11.8467
rna-XM_019279543.2	gene-LOC104918476	LOC104918476	SH2 domain-containing adapter protein D, transcript variant X3	0.17	0	0	0.09	0.51	0	0	0	0.18	0.35	0.16	0	0.056667	0.2	0.06	0.17
rna-XM_027289973.1	gene-LOC104918476	LOC104918476	SH2 domain-containing adapter protein D, transcript variant X1	0	0	0	0.09	0.12	0.24	0.08	0.18	0	0	0.09	0.06	0	0.15	0.086667	0.05
rna-XM_027289974.1	gene-LOC104918476	LOC104918476	SH2 domain-containing adapter protein D, transcript variant X2	0	0.26	0.07	0	0	0.24	0.14	0.12	0	0	0	0.11	0.11	0.08	0.086667	0.036667
rna-XM_027289975.1	gene-LOC104918476	LOC104918476	SH2 domain-containing adapter protein D, transcript variant X4	0	0	0	0	0	0	0	0	0	0	0	0	0	0	0	0
rna-XM_010730251.3	gene-LOC104918477	LOC104918477	sphingosine 1-phosphate receptor 3	2.26	3.15	2.72	3.51	4.81	5.59	3.01	3.11	2.75	3.76	2.39	2.07	2.71	4.63667	2.95667	2.74
rna-XM_027290580.1	gene-LOC104918478	LOC104918478	mesoderm induction early response protein 2, transcript variant X1	5.48	5.87	6.19	6.53	5.02	4.69	4.44	4.64	5.85	5.3	5.25	5.44	5.84667	5.41333	4.97667	5.33
rna-XM_027290581.1	gene-LOC104918478	LOC104918478	mesoderm induction early response protein 2, transcript variant X2	0.18	0	0	0	0	0	0	0.17	0.17	0	0.08	0	0.06	0	0.113333	0.026667
rna-XM_010730253.3	gene-LOC104918479	LOC104918479	phospholipid phosphatase 2	5.21	4.59	3.3	6.61	3.55	6.69	4.04	4.04	5.94	5.33	4.57	3.99	4.36667	5.61667	4.67333	4.63
rna-XM_019274351.2	gene-LOC104918480	LOC104918480	transducin-like enhancer protein 1, transcript variant X1	0.86	0.18	0	0.79	0.15	0.41	0.37	0	0.68	0.11	0	0.16	0.346667	0.45	0.35	0.09
rna-XM_019274353.2	gene-LOC104918480	LOC104918480	transducin-like enhancer protein 1, transcript variant X2	0.47	0.5	0	0	0.33	0.39	0.82	0.35	0.26	0.13	0.47	0.54	0.323333	0.24	0.476667	0.38
rna-XM_019274354.2	gene-LOC104918480	LOC104918480	transducin-like enhancer protein 1, transcript variant X3	0.47	0.21	1.13	0.26	0.8	0.44	0.2	0.58	1.46	0.72	0.53	1.04	0.603333	0.5	0.746667	0.763333
rna-XM_019270264.2	gene-LOC104918484	LOC104918484	single-stranded DNA-binding protein 3, transcript variant X1	0.98	1.18	0.24	0.74	0	0.78	0.61	0.73	0.46	0.55	0.7	0.55	0.8	0.506667	0.6	0.6
rna-XM_019270265.2	gene-LOC104918484	LOC104918484	single-stranded DNA-binding protein 3, transcript variant X2	0.88	0	1.13	1.12	1.45	1.22	1.43	0.96	1.87	1.53	1.05	0.93	0.67	1.26333	1.42	1.17
rna-XM_019270249.2	gene-LOC104918485	LOC104918485	cytokine receptor-like factor 1, transcript variant X1	0	0	0	0	0	0	0	0	0	0	0	0.09	0	0	0	0.03
rna-XM_027290280.1	gene-LOC104918485	LOC104918485	cytokine receptor-like factor 1, transcript variant X2	0.05	0	0.06	0	0	0.12	0	0	0	0	0	0	0.036667	0.04	0	0
rna-XM_027290281.1	gene-LOC104918485	LOC104918485	cytokine receptor-like factor 1, transcript variant X3	0	0.2	0.06	0.09	0.1	0	0	0.1	0.05	0	0.05	0	0.086667	0.063333	0.05	0.016667
rna-XM_019270267.2	gene-LOC104918489	LOC104918489	zinc finger protein GLIS1, transcript variant X1	0	0	0	0	0	0	0	0	0	0	0	0	0	0	0	0
rna-XM_019270268.2	gene-LOC104918489	LOC104918489	zinc finger protein GLIS1, transcript variant X2	0	0	0	0	0	0.93	0	0	0	0	0	0	0	0.31	0	0
rna-XM_019270269.2	gene-LOC104918489	LOC104918489	zinc finger protein GLIS1, transcript variant X3	1.43	1.69	1.51	1.42	1.92	0.57	1.75	1.77	1.21	1.38	1.78	1.68	1.54333	1.30333	1.57667	1.61333
rna-XM_027289920.1	gene-LOC104918493	LOC104918493	alpha-N-acetylgalactosaminide alpha-2,6-sialyltransferase 5	0	0	0.05	0	0	0.09	0	0.15	0	0	0.1	0	0.016667	0.03	0.05	0.033333
rna-XM_010730268.3	gene-LOC104918494	LOC104918494	prostaglandin F2-alpha receptor	0	0	0	0	0	0	0	0	0	0	0	0	0	0	0	0
rna-XM_019279561.2	gene-LOC104918495	LOC104918495	transcription factor BTF3 homolog 4	126.7	110.59	112.15	117.95	118.74	112.38	123.23	125.92	127.19	134.62	121.31	101.49	116.48	116.357	125.447	119.14
rna-XM_027290534.1	gene-LOC104918496	LOC104918496	zinc finger FYVE domain-containing protein 9, transcript variant X1	0	0.23	0	0	0	0	0	0	0	0	0	0	0.076667	0	0	0
rna-XM_027290535.1	gene-LOC104918496	LOC104918496	zinc finger FYVE domain-containing protein 9, transcript variant X2	0.17	0	0.08	0.44	0.32	0.37	0	0.44	0.26	0.17	0.48	0.25	0.083333	0.376667	0.233333	0.3
rna-XM_027290536.1	gene-LOC104918496	LOC104918496	zinc finger FYVE domain-containing protein 9, transcript variant X3	0.28	0.31	0.27	0.39	0.77	0.53	0.41	0.62	0.64	0.79	0.68	0.38	0.286667	0.563333	0.556667	0.616667
rna-XM_027290517.1	gene-LOC104918498	LOC104918498	cell wall integrity and stress response component 4, transcript variant X1	0.85	0.99	0.58	1.36	0.22	0.77	0.7	0.59	1.5	0.67	0.54	0.9	0.806667	0.783333	0.93	0.703333
rna-XM_027290518.1	gene-LOC104918498	LOC104918498	cell wall integrity and stress response component 4, transcript variant X2	0	0	0	0	0.55	0	0	0	0.57	0.59	0	0	0	0.183333	0.19	0.196667
rna-XM_019279559.2	gene-LOC104918499	LOC104918499	torsin-1A-interacting protein 2-like, transcript variant X2	9.47	7.53	6	4.45	7.85	12.95	11.69	10.12	11.37	8.17	14.34	10.79	7.66667	8.41667	11.06	11.1
rna-XM_027290519.1	gene-LOC104918499	LOC104918499	torsin-1A-interacting protein 2-like, transcript variant X1	6.89	8.77	13.01	14.68	11.62	4.73	2.67	4.28	2.81	8.63	2.59	7.17	9.55667	10.3433	3.25333	6.13
rna-XM_027290520.1	gene-LOC104918499	LOC104918499	torsin-1A-interacting protein 2-like, transcript variant X3	1.35	0.42	0.54	0.68	0.8	0.16	1.02	0	0.17	0.43	0	0	0.77	0.546667	0.396667	0.143333
rna-XM_019279556.2	gene-LOC104918500	LOC104918500	olfactomedin-like protein 2B	1.21	1.15	1.19	1.25	1.22	1.48	1.03	1.57	1.36	1.14	1.33	1.33	1.18333	1.31667	1.32	1.26667
rna-XM_019279553.2	gene-LOC104918502	LOC104918502	outer dense fiber protein 3-like protein 2	0	0	0	0	0	0	0	0	0	0	0	0	0	0	0	0
rna-XM_019274355.2	gene-LOC104918505	LOC104918505	transducin-like enhancer protein 4, transcript variant X1	0.36	0.94	0.87	0.26	0.19	0.61	0.73	0.52	0.54	0.53	0.48	0.64	0.723333	0.353333	0.596667	0.55
rna-XM_019274356.2	gene-LOC104918505	LOC104918505	transducin-like enhancer protein 4, transcript variant X2	2.71	3.03	2.8	3.69	3.78	4.69	3.24	3.05	3.02	3.53	2.31	1.64	2.84667	4.05333	3.10333	2.49333
rna-XM_027290321.1	gene-LOC104918505	LOC104918505	transducin-like enhancer protein 4, transcript variant X3	0	0.25	0	0	0	0	0	0	0.69	0.75	0.63	0.49	0.083333	0	0.23	0.623333
rna-XM_027290322.1	gene-LOC104918505	LOC104918505	transducin-like enhancer protein 4, transcript variant X4	4.1	3.66	2.87	4.53	2.97	4.71	4.39	4.7	4.57	4.58	3.9	2.52	3.54333	4.07	4.55333	3.66667
rna-XM_010730283.3	gene-LOC104918507	LOC104918507	centriole, cilia and spindle-associated protein, transcript variant X1	0.88	0.65	0.87	0.82	0.75	0.94	0.95	0.93	0.73	0.73	0.31	0.51	0.8	0.836667	0.87	0.516667
rna-XM_027283557.1	gene-LOC104918507	LOC104918507	centriole, cilia and spindle-associated protein, transcript variant X2	0.53	0.34	0.3	0.81	1.06	0.56	0.97	0.38	0.66	0.63	0.45	0.9	0.39	0.81	0.67	0.66
rna-XM_019273494.2	gene-LOC104918508	LOC104918508	actin, alpha cardiac	2.87	3.05	5.05	2.52	3.03	5.83	2.59	5.29	8.81	3.43	4.27	5.51	3.65667	3.79333	5.56333	4.40333
rna-XM_027283343.1	gene-LOC104918512	LOC104918512	interferon gamma receptor 1-like, transcript variant X1	0	0	0	0	0	0	0	0	0	0	0	0	0	0	0	0
rna-XM_027283344.1	gene-LOC104918512	LOC104918512	interferon gamma receptor 1-like, transcript variant X2	0	0	0	0	0	0	0	0	0	0	0	0	0	0	0	0
rna-XM_027283273.1	gene-LOC104918514	LOC104918514	sperm acrosome-associated protein 5-like	0	0	0	0	0	0	0	0.1	0	0	0	0	0	0	0.033333	0
rna-XM_010730290.3	gene-LOC104918515	LOC104918515	protein let-653-like	0	0.04	0	0	0	0	0	0.14	0	0	0	0.12	0.013333	0	0.046667	0.04
rna-XM_019259744.2	gene-LOC104918516	LOC104918516	RAC-gamma serine/threonine-protein kinase	4.07	1.14	0.67	4.87	6.48	5.24	0	6.08	2.02	1.07	6.45	4.67	1.96	5.53	2.7	4.06333
rna-XM_027283543.1	gene-LOC104918522	LOC104918522	uncharacterized LOC104918522	0	0	0.1	0	0	0	0	0	0.05	0	0	0	0.033333	0	0.016667	0
rna-XM_019259729.2	gene-LOC104918527	LOC104918527	UTP--glucose-1-phosphate uridylyltransferase, transcript variant X1	2.7	3.12	1.71	2.66	1.74	2.73	1.9	1.97	2.38	2.54	2.9	1.17	2.51	2.37667	2.08333	2.20333
rna-XM_019259730.2	gene-LOC104918527	LOC104918527	UTP--glucose-1-phosphate uridylyltransferase, transcript variant X2	3.13	2.94	3.33	3.26	2.89	3.15	4.75	4.79	5.63	4.81	3.56	2.27	3.13333	3.1	5.05667	3.54667
rna-XM_010730313.3	gene-LOC104918531	LOC104918531	equilibrative nucleoside transporter 2, transcript variant X1	4.7	6.2	6.39	4.78	9.29	4.4	7.55	7.11	5.21	4.98	7.95	8.34	5.76333	6.15667	6.62333	7.09
rna-XM_010730314.3	gene-LOC104918531	LOC104918531	equilibrative nucleoside transporter 2, transcript variant X2	11.16	9.87	10.1	10.94	9.1	8.82	9.04	9.52	9.61	10.08	8.98	10.13	10.3767	9.62	9.39	9.73
rna-XM_010730315.3	gene-LOC104918532	LOC104918532	galectin-related protein, transcript variant X1	1.22	1.01	0.42	1.31	1.14	2.33	0.78	0.75	0.88	0.91	0.44	0.91	0.883333	1.59333	0.803333	0.753333
rna-XM_019259717.2	gene-LOC104918532	LOC104918532	galectin-related protein, transcript variant X2	0.69	1.35	1.46	1.27	0.9	0.57	1.79	0.76	1.41	1.62	0.96	1.28	1.16667	0.913333	1.32	1.28667
rna-XM_027283591.1	gene-LOC104918532	LOC104918532	galectin-related protein, transcript variant X3	0	0	0	0	0	0	0	0.4	0	0	0.45	0	0	0	0.133333	0.15
rna-XM_019259738.2	gene-LOC104918534	LOC104918534	aftiphilin, transcript variant X1	0.37	0.2	0	0.08	0	0.19	0.36	0	0	0	0	0.02	0.19	0.09	0.12	0.006667
rna-XM_019259739.2	gene-LOC104918534	LOC104918534	aftiphilin, transcript variant X3	0.19	0.26	0.1	0.28	0.13	0	0	0.1	0	0.25	0.33	0.64	0.183333	0.136667	0.033333	0.406667
rna-XM_019259740.2	gene-LOC104918534	LOC104918534	aftiphilin, transcript variant X4	0.72	0.4	0.52	1.08	1.64	0.65	0.24	1.52	0.33	0.79	0.45	0.74	0.546667	1.12333	0.696667	0.66
rna-XM_019259741.2	gene-LOC104918534	LOC104918534	aftiphilin, transcript variant X5	0.92	0.2	0.71	0	0.46	0	0.33	0.5	0.73	0	0.93	0	0.61	0.153333	0.52	0.31
rna-XM_019259742.2	gene-LOC104918534	LOC104918534	aftiphilin, transcript variant X6	0.66	1.66	1.05	1.71	1.54	2.47	1.44	0.82	1.27	1.69	1.82	0.87	1.12333	1.90667	1.17667	1.46
rna-XM_027283274.1	gene-LOC104918534	LOC104918534	aftiphilin, transcript variant X2	0	0	0	0	0	0	0	0	0	0	0	0	0	0	0	0
rna-XM_010730318.3	gene-LOC104918535	LOC104918535	SERTA domain-containing protein 2	2.37	3.1	4.8	2.64	2.83	3.4	2.64	2.62	2.03	2.11	3.17	4.26	3.42333	2.95667	2.43	3.18
rna-XM_010730323.3	gene-LOC104918537	LOC104918537	E3 ubiquitin-protein ligase TRIM21	31.58	43.66	47.01	26.86	39.4	29.78	35.42	41.34	28.78	36.14	36	36.76	40.75	32.0133	35.18	36.3
rna-XM_010730326.3	gene-LOC104918538	LOC104918538	ARP2 actin related protein 2 homolog	40.71	36.02	34.87	30.5	36.21	34.13	35.12	36	41.14	37.74	41.11	32.82	37.2	33.6133	37.42	37.2233
rna-XM_010730327.3	gene-LOC104918539	LOC104918539	homeobox protein Meis1	4.85	4.02	3.59	7.99	6.32	9.31	4.01	5.54	5.71	6.71	5.85	5.12	4.15333	7.87333	5.08667	5.89333
rna-XM_010730328.3	gene-LOC104918540	LOC104918540	calcineurin subunit B type 1	15.53	12.65	13.65	14.35	16.73	15.31	14.92	16.44	16.58	16.96	19.16	15.31	13.9433	15.4633	15.98	17.1433
rna-XM_010730332.3	gene-LOC104918541	LOC104918541	group XIIB secretory phospholipase A2-like protein, transcript variant X1	0	0.04	0	0	0	0	0	0	0	0	0	0	0.013333	0	0	0
rna-XM_010730339.3	gene-LOC104918541	LOC104918541	group XIIB secretory phospholipase A2-like protein, transcript variant X2	0	0	0	0	0.04	0	0	0	0	0	0	0	0	0.013333	0	0
rna-XM_010730329.3	gene-LOC104918542	LOC104918542	CB1 cannabinoid receptor-interacting protein 1	0.02	0	0.03	0	0	0	0.02	0	0	0	0	0	0.016667	0	0.006667	0
rna-XM_010730372.3	gene-LOC104918545	LOC104918545	talin-2, transcript variant X1	2.77	2.21	1.47	4.07	2.31	2.69	3.02	3	1.96	3.16	1.97	0.94	2.15	3.02333	2.66	2.02333
rna-XM_027281302.1	gene-LOC104918545	LOC104918545	talin-2, transcript variant X2	0	0.81	0.49	0	0.3	0.3	0	0.26	0.6	0.31	0	0.32	0.433333	0.2	0.286667	0.21
rna-XM_027281303.1	gene-LOC104918545	LOC104918545	talin-2, transcript variant X3	0.4	0	0.5	0	0.36	1.41	0.48	0	1.31	0	0.8	1.2	0.3	0.59	0.596667	0.666667
rna-XM_027282559.1	gene-LOC104918548	LOC104918548	protocadherin Fat 4, transcript variant X1	0	0	0	0	0	0	0	0	0	0	0	0	0	0	0	0
rna-XM_027282560.1	gene-LOC104918548	LOC104918548	protocadherin Fat 4, transcript variant X2	0.03	0	0.06	0.03	0	0	0.01	0	0	0	0	0.01	0.03	0.01	0.003333	0.003333
rna-XM_027282329.1	gene-LOC104918550	LOC104918550	uncharacterized LOC104918550	0	0	0	0	0	0	0	0	0.13	0	0	0	0	0	0.043333	0
rna-XM_010730341.3	gene-LOC104918553	LOC104918553	prokineticin receptor 1	0	0	0	0	0	0	0	0	0	0	0.03	0	0	0	0	0.01
rna-XM_019277816.2	gene-LOC104918561	LOC104918561	collagen alpha-1(XI) chain, transcript variant X1	1.15	1.45	1.48	1.9	3.02	3.11	2.3	2.29	2.67	2.36	2.74	1.27	1.36	2.67667	2.42	2.12333
rna-XM_027285535.1	gene-LOC104918561	LOC104918561	collagen alpha-1(XI) chain, transcript variant X2	1.04	1.64	0.32	0.65	0.26	1.32	0.84	0.8	1.01	1.4	0.3	0.71	1	0.743333	0.883333	0.803333
rna-XM_010730356.3	gene-LOC104918563	LOC104918563	neurogenic locus notch homolog protein 2	2.32	2.04	1.99	2.71	3.45	3.85	2.54	3.02	2.71	3.51	2.75	1.98	2.11667	3.33667	2.75667	2.74667
rna-XM_010730357.3	gene-LOC104918564	LOC104918564	retinol dehydrogenase 8, transcript variant X1	0	0	0	0	0	0	0	0	0	0	0	0	0	0	0	0
rna-XM_027284893.1	gene-LOC104918564	LOC104918564	retinol dehydrogenase 8, transcript variant X2	0	0	0	0	0	0	0	0.13	0	0	0	0	0	0	0.043333	0
rna-XM_010730358.3	gene-LOC104918565	LOC104918565	nuclear receptor subfamily 5 group A member 2	0.14	0.06	0	0	0.06	0	0	0	0	0	0	0.03	0.066667	0.02	0	0.01
rna-XM_027285159.1	gene-LOC104918568	LOC104918568	syntaxin-binding protein 2	56.75	58.71	53.13	52.51	60.67	58.78	56.47	56.7	58.33	61.14	68.74	56.82	56.1967	57.32	57.1667	62.2333
rna-XM_027284869.1	gene-LOC104918570	LOC104918570	bromodomain-containing protein 4, transcript variant X1	0	0	0	0	0	0	0	0	0	0	0	0	0	0	0	0
rna-XM_027284870.1	gene-LOC104918570	LOC104918570	bromodomain-containing protein 4, transcript variant X2	0.17	0.16	0.38	0.33	0.37	0.24	0.42	0.13	0.25	0.45	0.51	0	0.236667	0.313333	0.266667	0.32
rna-XM_027284871.1	gene-LOC104918570	LOC104918570	bromodomain-containing protein 4, transcript variant X3	0.67	0.32	0.13	0.45	0.08	0.33	0.13	0.3	0.43	0.12	0.22	0.21	0.373333	0.286667	0.286667	0.183333
rna-XM_027284872.1	gene-LOC104918570	LOC104918570	bromodomain-containing protein 4, transcript variant X4	0	0	0	0	0	0	0	0	0	0	0	0	0	0	0	0
rna-XM_019264990.2	gene-LOC104918571	LOC104918571	lysophosphatidic acid receptor 1-A	2.45	2.52	1.41	1.96	1.07	1.07	1.83	1.2	1.33	1.3	0.68	0.86	2.12667	1.36667	1.45333	0.946667
rna-XM_010730366.3	gene-LOC104918572	LOC104918572	pre-B-cell leukemia transcription factor 1, transcript variant X2	8.42	8.19	7.17	7.06	5.85	7.11	8.81	7.46	8.38	8.47	7.33	5.38	7.92667	6.67333	8.21667	7.06
rna-XM_019264988.2	gene-LOC104918572	LOC104918572	pre-B-cell leukemia transcription factor 1, transcript variant X1	1.88	1.35	2.7	1.93	2.47	2.97	2.07	2.1	2.29	2.17	2.33	2.46	1.97667	2.45667	2.15333	2.32
rna-XM_010730368.3	gene-LOC104918573	LOC104918573	Kinetochore-associated protein DSN1, transcript variant X1	2.18	0.79	1.08	1.19	0.83	0.85	1.35	1.26	0.87	1.11	0.59	0.97	1.35	0.956667	1.16	0.89
rna-XM_010730369.3	gene-LOC104918573	LOC104918573	Kinetochore-associated protein DSN1, transcript variant X2	3.13	4.58	3.37	4.01	3.12	2.83	3.25	3.56	4.09	4.25	3.87	3.3	3.69333	3.32	3.63333	3.80667
rna-XM_027285941.1	gene-LOC104918577	LOC104918577	procollagen galactosyltransferase 1-like	10.36	10.85	11.88	9.91	10.03	10.55	8.96	9.44	10.9	9.13	7.9	11.92	11.03	10.1633	9.76667	9.65
rna-XM_010730376.3	gene-LOC104918578	LOC104918578	zinc finger protein 271	6.28	3.8	5.1	5.2	4.25	4.44	5.3	5.17	5.59	5.68	4.9	4.42	5.06	4.63	5.35333	5
rna-XM_010730382.3	gene-LOC104918583	LOC104918583	CD97 antigen, transcript variant X1	32.01	25.53	11.96	8.3	43.01	39.41	27.64	19.58	32.55	16.33	6.89	10.75	23.1667	30.24	26.59	11.3233
rna-XM_027285904.1	gene-LOC104918583	LOC104918583	CD97 antigen, transcript variant X2	3.16	6.02	6.75	3.7	2.87	6.52	4.22	7.46	6.02	4.45	6.36	6.44	5.31	4.36333	5.9	5.75
rna-XM_010730385.3	gene-LOC104918584	LOC104918584	phospholipid phosphatase 3	0.26	0.32	0.42	0.4	0.45	0.5	0.35	0.85	0.7	1.1	0.67	0.59	0.333333	0.45	0.633333	0.786667
rna-XM_010730386.3	gene-LOC104918585	LOC104918585	uncharacterized LOC104918585	1.92	1.36	1.84	1.08	2.19	1.42	1.06	1.95	1.04	1.67	2.45	1.73	1.70667	1.56333	1.35	1.95
rna-XM_010730387.3	gene-LOC104918586	LOC104918586	tumor necrosis factor ligand superfamily member 14, transcript variant X1	24.07	27.04	30.2	25.38	27.99	28.69	25.26	33.42	22.79	26.03	34.36	23.78	27.1033	27.3533	27.1567	28.0567
rna-XM_010730388.3	gene-LOC104918586	LOC104918586	tumor necrosis factor ligand superfamily member 14, transcript variant X2	1.01	0.71	1.55	1.02	1.56	1.36	0.63	0.86	0.17	0.39	0.84	0.17	1.09	1.31333	0.553333	0.466667
rna-XM_010730389.3	gene-LOC104918588	LOC104918588	transmembrane emp24 domain-containing protein 1	0.07	0	0	0	0	0	0	0	0	0	0	0	0.023333	0	0	0
rna-XM_019264973.2	gene-LOC104918589	LOC104918589	dynamin-2, transcript variant X1	29.88	29	28.68	28.22	34.77	30.89	25.9	27.97	31.75	32.98	30.52	31.34	29.1867	31.2933	28.54	31.6133
rna-XM_019264974.2	gene-LOC104918589	LOC104918589	dynamin-2, transcript variant X2	7.69	7.7	3.99	8.48	7.99	7.98	8	7.43	6.02	5.88	5.31	5.81	6.46	8.15	7.15	5.66667
rna-XM_019264975.2	gene-LOC104918589	LOC104918589	dynamin-2, transcript variant X3	0.08	0.11	0	0.07	0	0.16	0	0.15	0.06	0	0.07	0.3	0.063333	0.076667	0.07	0.123333
rna-XM_019264977.2	gene-LOC104918589	LOC104918589	dynamin-2, transcript variant X6	0	0.15	0	0	0.49	0.19	0.15	0	0.17	0.75	0.93	0.15	0.05	0.226667	0.106667	0.61
rna-XM_027285513.1	gene-LOC104918589	LOC104918589	dynamin-2, transcript variant X4	0	0	0	0	0	0	0	0	0	0	0	0	0	0	0	0
rna-XM_027285514.1	gene-LOC104918589	LOC104918589	dynamin-2, transcript variant X5	0	0.07	0.11	0	0	0.11	0	0	0	0	0	0	0.06	0.036667	0	0
rna-XM_010730398.3	gene-LOC104918591	LOC104918591	C-factor	0	1.37	0	4.82	0	0	2.99	0	0	0	0	0.64	0.456667	1.60667	0.996667	0.213333
rna-XM_010730399.3	gene-LOC104918592	LOC104918592	PDZ domain-containing protein GIPC1	3.57	3.91	3.52	4.84	3.54	4.61	3.27	2.78	3.06	4.31	4.04	3.42	3.66667	4.33	3.03667	3.92333
rna-XM_010730400.3	gene-LOC104918593	LOC104918593	dnaJ homolog subfamily B member 1	5.52	5.4	6.08	5.57	5.65	5.62	5.78	4.9	6.08	5.65	5.18	5.52	5.66667	5.61333	5.58667	5.45
rna-XM_019270236.2	gene-LOC104918594	LOC104918594	tyrosine-protein kinase Mer	7.7	8.63	17.56	15.26	14.84	12.11	2.39	10.22	7.33	1.89	10.14	13.11	11.2967	14.07	6.64667	8.38
rna-XM_010730401.3	gene-LOC104918595	LOC104918595	very-long-chain enoyl-CoA reductase, transcript variant X1	0	0	0	0	0	0	0	0	0	0	0	0	0	0	0	0
rna-XM_019264999.2	gene-LOC104918595	LOC104918595	very-long-chain enoyl-CoA reductase, transcript variant X2	0	0.03	0	0	0	0	0	0.03	0	0.13	0	0.05	0.01	0	0.01	0.06
rna-XM_010730402.3	gene-LOC104918596	LOC104918596	atherin, transcript variant X1	0.76	1.3	1.54	1.51	1.55	1.09	1.37	1.08	0.81	1.1	1.19	1.56	1.2	1.38333	1.08667	1.28333
rna-XM_010730403.3	gene-LOC104918596	LOC104918596	atherin, transcript variant X2	0.64	0.11	0.3	0.27	0	0.36	0.68	0.36	0.81	0.41	0.75	0.36	0.35	0.21	0.616667	0.506667
rna-XM_010730405.3	gene-LOC104918597	LOC104918597	cAMP-dependent protein kinase catalytic subunit alpha, transcript variant X2	10.66	7.57	8.25	9.01	12.4	10.7	9.14	11.36	10.44	11.11	11	7.72	8.82667	10.7033	10.3133	9.94333
rna-XM_019264997.2	gene-LOC104918597	LOC104918597	cAMP-dependent protein kinase catalytic subunit alpha, transcript variant X1	0	0.21	0	0	0	0.49	0	0	0	0	0	0	0.07	0.163333	0	0
rna-XM_019264969.2	gene-LOC104918598	LOC104918598	histone chaperone asf1b-B	9.5	12.89	10.83	10.94	10.73	9.27	11.81	11.19	10.31	11.98	11.11	11.89	11.0733	10.3133	11.1033	11.66
rna-XM_010730408.3	gene-LOC104918600	LOC104918600	tubulin beta-4B chain	0.21	0.19	0.43	0.11	0.3	0.14	0.15	0.2	0.11	0.46	0.39	0.41	0.276667	0.183333	0.153333	0.42
rna-XM_010730410.3	gene-LOC104918601	LOC104918601	zinc-binding protein A33, transcript variant X2	0.37	0.81	0.61	0.57	1.08	0.68	0.53	0.56	0.47	0.41	0.72	0.35	0.596667	0.776667	0.52	0.493333
rna-XM_027284724.1	gene-LOC104918601	LOC104918601	zinc-binding protein A33, transcript variant X1	0.24	0	0.12	0	0.07	0.15	0	0.13	0.08	0.25	0	0.06	0.12	0.073333	0.07	0.103333
rna-XM_010730416.3	gene-LOC104918604	LOC104918604	lutropin-choriogonadotropic hormone receptor	0	0	0	0	0	0.02	0	0	0	0	0	0.02	0	0.006667	0	0.006667
rna-XM_019264991.2	gene-LOC104918605	LOC104918605	methyltransferase-like 26 B	0.04	0	0.1	0	0	0	0.07	0	0	0	0.1	0	0.046667	0	0.023333	0.033333
rna-XM_010730423.3	gene-LOC104918611	LOC104918611	ketosamine-3-kinase	2.75	2.19	2.62	3.21	1.43	2.41	4.39	2.53	3.45	1.95	2.36	1.57	2.52	2.35	3.45667	1.96
rna-XM_027284966.1	gene-LOC104918616	LOC104918616	heme-binding protein 2-like	0	0	0	0	0	0	0	0	0	0.1	0	0	0	0	0	0.033333
rna-XM_027284879.1	gene-LOC104918617	LOC104918617	myosin heavy chain, fast skeletal muscle	0.02	0	0	0.01	0	0.04	0	0	0	0	0	0.02	0.006667	0.016667	0	0.006667
rna-XM_027284880.1	gene-LOC104918618	LOC104918618	myosin heavy chain, fast skeletal muscle	0	0	0	0	0	0	0	0	0	0	0	0	0	0	0	0
rna-XM_027285160.1	gene-LOC104918619	LOC104918619	myosin heavy chain, fast skeletal muscle	0	0	0	0	0	0	0	0	0	0	0	0	0	0	0	0
rna-XM_019266483.2	gene-LOC104918621	LOC104918621	uncharacterized LOC104918621, transcript variant X2	0.31	0.02	0.16	0.08	0.06	0.12	0.3	0.14	0.18	0.2	0.27	0.24	0.163333	0.086667	0.206667	0.236667
rna-XM_027285158.1	gene-LOC104918621	LOC104918621	uncharacterized LOC104918621, transcript variant X1	0	0	0	0	0	0	0	0	0	0	0	0	0	0	0	0
rna-XM_019264993.2	gene-LOC104918622	LOC104918622	LIM homeobox transcription factor 1-alpha	0.11	0.04	0.04	0.12	0.2	0.02	0.06	0.04	0.06	0.06	0.06	0.11	0.063333	0.113333	0.053333	0.076667
rna-XM_019264981.2	gene-LOC104918625	LOC104918625	zinc finger protein 2, transcript variant X1	0	0	0	0.77	1.03	0	0	1.69	1.07	0.17	0.38	1.44	0	0.6	0.92	0.663333
rna-XM_019264983.2	gene-LOC104918625	LOC104918625	zinc finger protein 2, transcript variant X2	0.43	0.55	1	0.96	1.06	0.72	0.43	1.13	0.73	0.32	0.56	0.27	0.66	0.913333	0.763333	0.383333
rna-XM_027285942.1	gene-LOC104918625	LOC104918625	zinc finger protein 2, transcript variant X3	0	0	0.11	0	0	0.1	0.1	0.45	0	0	0	0.23	0.036667	0.033333	0.183333	0.076667
rna-XM_010730436.3	gene-LOC104918626	LOC104918626	zinc-binding protein A33, transcript variant X1	0	0	0	0	0	0	0	0	0	0	0	0	0	0	0	0
rna-XM_027285542.1	gene-LOC104918626	LOC104918626	zinc-binding protein A33, transcript variant X2	0	0.05	0	0.05	0	0	0.05	0	0	0.05	0	0	0.016667	0.016667	0.016667	0.016667
rna-XM_027285511.1	gene-LOC104918628	LOC104918628	potassium channel subfamily T member 2	0	0	0	0	0.01	0	0.01	0	0	0	0	0	0	0.003333	0.003333	0
rna-XM_019264994.2	gene-LOC104918629	LOC104918629	E3 ubiquitin-protein ligase TRIM39-like	0.03	0.12	0.12	0.03	0.09	0.08	0.09	0.19	0.05	0.03	0.06	0.11	0.09	0.066667	0.11	0.066667
rna-XM_010730444.3	gene-LOC104918633	LOC104918633	dexamethasone-induced Ras-related protein 1	0.07	0	0.06	0	0	0.06	0	0	0	0	0	0	0.043333	0.02	0	0
rna-XM_010730451.3	gene-LOC104918639	LOC104918639	tyrosine-protein phosphatase non-receptor type 2, transcript variant X2	16.06	14.02	14.85	13.9	15.26	14.04	14.64	13.81	13.65	13.9	14.23	15.09	14.9767	14.4	14.0333	14.4067
rna-XM_019263309.2	gene-LOC104918639	LOC104918639	tyrosine-protein phosphatase non-receptor type 2, transcript variant X1	0.98	0.83	0.82	0.79	1.54	0.91	1.08	1.16	1.49	1.3	0.45	0.97	0.876667	1.08	1.24333	0.906667
rna-XM_010730452.3	gene-LOC104918640	LOC104918640	E3 ubiquitin-protein ligase RNF19A	17.48	17.1	18.06	19.79	16.71	20.12	17.68	18.84	19.9	20.89	18.06	21.34	17.5467	18.8733	18.8067	20.0967
rna-XM_010730456.3	gene-LOC104918643	LOC104918643	2-iminobutanoate/2-iminopropanoate deaminase, transcript variant X1	2.4	1.93	2.07	1.93	1.89	1.58	1.82	1.85	2.97	2.29	0.95	1.38	2.13333	1.8	2.21333	1.54
rna-XM_010730457.3	gene-LOC104918643	LOC104918643	2-iminobutanoate/2-iminopropanoate deaminase, transcript variant X2	0	0	0	0	0	0	0	0	0	0	0	0	0	0	0	0
rna-XM_019263303.2	gene-LOC104918645	LOC104918645	cytochrome c1, transcript variant X1	0.08	0	0.08	0	0	0.02	0	0	0	0	0	0.02	0.053333	0.006667	0	0.006667
rna-XM_027286195.1	gene-LOC104918645	LOC104918645	cytochrome c1, transcript variant X2	0	0	0	0	0	0	0	0.07	0	0	0	0	0	0	0.023333	0
rna-XM_010730459.3	gene-LOC104918647	LOC104918647	lysosomal-associated transmembrane protein 4B	0.13	0.2	0.29	0.63	0.36	0.27	0.37	0.3	0.27	0.39	0.55	0.69	0.206667	0.42	0.313333	0.543333
rna-XM_010730460.3	gene-LOC104918648	LOC104918648	protein LYRIC, transcript variant X1	10.64	12.55	13.79	9.51	11.97	5.24	9.19	7.22	6.96	8.29	6.53	11.43	12.3267	8.90667	7.79	8.75
rna-XM_010730462.3	gene-LOC104918648	LOC104918648	protein LYRIC, transcript variant X2	33.29	30.67	33.84	30.08	34.17	32.18	32.01	35.34	38.5	35.99	38.57	36.22	32.6	32.1433	35.2833	36.9267
rna-XM_010730464.3	gene-LOC104918650	LOC104918650	nuclear transport factor 2-like	75.11	69.72	69.13	59.8	62.9	57.5	66.55	63.5	72.29	64.28	66.95	67.55	71.32	60.0667	67.4467	66.26
rna-XM_010730465.3	gene-LOC104918651	LOC104918651	biogenesis of lysosome-related organelles complex 1 subunit 4	11.57	13.74	13.76	15.24	14.44	12.18	12.97	12.6	13.67	12.61	13.86	13.26	13.0233	13.9533	13.08	13.2433
rna-XM_019277551.2	gene-LOC104918656	LOC104918656	ADP-ribosylation factor-like protein 6	0	0	0	0	0	0	0	0	0	0	0	0	0	0	0	0
rna-XM_010730479.3	gene-LOC104918660	LOC104918660	Glutaredoxin-1, transcript variant X1	2.23	3.96	2.9	2.78	5.79	4.48	3.87	4.59	5.02	5.18	6.49	1.83	3.03	4.35	4.49333	4.5
rna-XM_027290833.1	gene-LOC104918660	LOC104918660	Glutaredoxin-1, transcript variant X2	2.11	1.02	2.01	1.67	0.78	3.14	1.21	1.95	3.19	1.83	1.75	3.32	1.71333	1.86333	2.11667	2.3
rna-XM_019263298.2	gene-LOC104918661	LOC104918661	sperm-associated antigen 1A	0	0.09	0.2	0.03	0.03	0.1	0.06	0.14	0.1	0.14	0.08	0.09	0.096667	0.053333	0.1	0.103333
rna-XM_019277554.2	gene-LOC104918663	LOC104918663	E3 SUMO-protein ligase RanBP2, transcript variant X1	4.44	3.92	3.86	3.53	4.45	4.58	3.56	4.67	3.33	3.38	4.38	4.25	4.07333	4.18667	3.85333	4.00333
rna-XM_019277555.2	gene-LOC104918663	LOC104918663	E3 SUMO-protein ligase RanBP2, transcript variant X2	0	0	0	0	0	0	0	0	0	0	0	0	0	0	0	0
rna-XM_010730485.3	gene-LOC104918665	LOC104918665	high-affinity choline transporter 1	0	0	0	0	0	0	0	0	0	0	0	0	0	0	0	0
rna-XM_010730494.3	gene-LOC104918673	LOC104918673	sphingosine 1-phosphate receptor 2	3.48	3.32	2.59	3.02	2.93	3.69	3.48	2.85	2.55	2.81	2.98	2.56	3.13	3.21333	2.96	2.78333
rna-XM_010730507.3	gene-LOC104918680	LOC104918680	dedicator of cytokinesis protein 7, transcript variant X1	0	0.17	0	0.51	0.19	0.19	0.25	0	0.13	0	0.27	0.47	0.056667	0.296667	0.126667	0.246667
rna-XM_010730508.3	gene-LOC104918680	LOC104918680	dedicator of cytokinesis protein 7, transcript variant X2	2.34	2	2.96	1.34	3.55	3.46	2.82	3.85	3.33	2.61	3.06	3.29	2.43333	2.78333	3.33333	2.98667
rna-XM_010730509.3	gene-LOC104918680	LOC104918680	dedicator of cytokinesis protein 7, transcript variant X3	3.91	3.85	3.18	5.35	5.05	4.88	5.07	3.6	5.09	4.66	3.99	3.06	3.64667	5.09333	4.58667	3.90333
rna-XM_010730512.3	gene-LOC104918681	LOC104918681	lutropin-choriogonadotropic hormone receptor	0.04	0.09	0.09	0.02	0.05	0.08	0	0.09	0.06	0.08	0.09	0.08	0.073333	0.05	0.05	0.083333
rna-XM_010730510.3	gene-LOC104918682	LOC104918682	KN motif and ankyrin repeat domain-containing protein 2	0.38	0.67	0.5	0.49	0.46	1.09	0.66	0.59	0.66	0.63	0.32	0.47	0.516667	0.68	0.636667	0.473333
rna-XM_010730518.3	gene-LOC104918683	LOC104918683	hemoglobin subunit alpha-1, transcript variant X2	13.3	13.67	9.62	26.34	8.01	7.21	5.71	6.19	10.56	7.03	9.75	28.22	12.1967	13.8533	7.48667	15
rna-XM_027285438.1	gene-LOC104918683	LOC104918683	hemoglobin subunit alpha-1, transcript variant X1	15115	21117.6	16564	41410	10272.8	12664.7	13142.7	6891.18	7573.3	11032.6	7937.08	29215	17598.9	21449.1	9202.4	16061.6
rna-XM_027285439.1	gene-LOC104918683	LOC104918683	hemoglobin subunit alpha-1, transcript variant X3	4057.5	6839.64	4220.01	9546.97	3813.13	4396.91	5410.76	2425.19	2794.3	2927.26	2405.67	5882	5039.05	5919	3543.42	3738.31
rna-XM_027285440.1	gene-LOC104918683	LOC104918683	hemoglobin subunit alpha-1, transcript variant X4	4165.4	6464.04	3959.11	9255.73	3373.42	4347	4781.33	2614.56	2844.24	2733.53	2198.47	5518.67	4862.85	5658.72	3413.38	3483.56
rna-XM_027285441.1	gene-LOC104918683	LOC104918683	hemoglobin subunit alpha-1, transcript variant X5	4314.59	6516.91	4105.41	9895.52	3760.86	4294.16	5296.72	2685.42	3309.91	2927.77	2581.38	6248.37	4978.97	5983.51	3764.02	3919.17
rna-XM_027285442.1	gene-LOC104918683	LOC104918683	hemoglobin subunit alpha-1, transcript variant X6	0	0	0	0	0	0	0	0	0	0	0	0	0	0	0	0
rna-NM_001303359.1	gene-LOC104918687	LOC104918687	hemoglobin subunit alpha-like	2597.32	3304.88	2111.5	5569.64	1704.42	1035.45	1570.42	580.48	1167.83	1009.57	841.95	5668.2	2671.23	2769.84	1106.24	2506.57
rna-XM_010730519.3	gene-LOC104918690	LOC104918690	hemoglobin subunit beta	24264.1	32083.5	25808.5	66459.1	19575.4	22953	23260	12874.9	13980.2	18789.8	13585.2	40838.2	27385.4	36329.2	16705	24404.4
rna-XM_010730520.3	gene-LOC104918692	LOC104918692	hemoglobin subunit alpha-A	8696.91	8570.99	6216.91	16815	5084.57	3900.22	4996.39	2398.49	4937.63	3850.45	3849.5	15077.3	7828.27	8599.93	4110.84	7592.41
rna-XM_019252859.2	gene-LOC104918693	LOC104918693	hemoglobin subunit beta	7941.09	6817.15	5431.16	14815.8	4880.53	3093.98	4220.45	1806.66	3688.45	3032.04	2966.66	12193.4	6729.8	7596.77	3238.52	6064.02
rna-XM_010730528.3	gene-LOC104918698	LOC104918698	serotonin N-acetyltransferase	0	0	0	0	0	0	0	0	0	0	0	0	0	0	0	0
rna-XM_019260441.2	gene-LOC104918703	LOC104918703	lipopolysaccharide-induced tumor necrosis factor-alpha factor	0.37	0.33	0.34	0.18	0.33	0.54	0.05	0.3	0.53	0.58	0.54	0.52	0.346667	0.35	0.293333	0.546667
rna-XM_010730535.3	gene-LOC104918704	LOC104918704	myocardin-related transcription factor B, transcript variant X3	0.33	0.72	0.45	1.35	1.25	1.66	1.02	0.9	0.63	0.53	1.43	0.55	0.5	1.42	0.85	0.836667
rna-XM_019260399.2	gene-LOC104918704	LOC104918704	myocardin-related transcription factor B, transcript variant X1	0.17	0.12	0.13	0	0	0.3	0.21	0.37	0.55	0.13	0	0.2	0.14	0.1	0.376667	0.11
rna-XM_019260405.2	gene-LOC104918704	LOC104918704	myocardin-related transcription factor B, transcript variant X2	0	0	0	0	0	0	0	0	0	0	0	0	0	0	0	0
rna-XM_010730536.3	gene-LOC104918705	LOC104918705	protein shisa-9B, transcript variant X1	0.58	0.48	0.58	1.72	0.2	2.16	0.69	0.44	0	0.32	0.17	0	0.546667	1.36	0.376667	0.163333
rna-XM_019260244.2	gene-LOC104918705	LOC104918705	protein shisa-9B, transcript variant X2	0.63	0.62	0.39	0	0.91	0.02	1.05	0.48	0.95	0.67	0.71	0.26	0.546667	0.31	0.826667	0.546667
rna-XM_010730538.3	gene-LOC104918707	LOC104918707	uncharacterized LOC104918707	0	0	0	0	0	0	0.03	0	0	0	0	0	0	0	0.01	0
rna-XM_010730545.3	gene-LOC104918709	LOC104918709	G-protein coupled estrogen receptor 1	0.03	0	0	0.05	0	0	0.03	0	0	0	0	0	0.01	0.016667	0.01	0
rna-XM_010730549.3	gene-LOC104918711	LOC104918711	heparan sulfate glucosamine 3-O-sulfotransferase 2	0.47	0.76	1.19	0.74	0.85	1.07	1.22	0.67	0.96	0.7	0.51	0.39	0.806667	0.886667	0.95	0.533333
rna-XM_010730552.3	gene-LOC104918713	LOC104918713	UNC93-like protein MFSD11, transcript variant X1	2.55	2.93	4.31	3.97	2.95	2.3	3.74	3.09	3.85	1.99	3.34	4.9	3.26333	3.07333	3.56	3.41
rna-XR_002042112.2	gene-LOC104918713	LOC104918713	UNC93-like protein MFSD11, transcript variant X2	0	0	0	0	0.11	1.44	0.34	0	0	2.14	0	0	0	0.516667	0.113333	0.713333
rna-XM_010730557.3	gene-LOC104918718	LOC104918718	phospholipase A2	0.96	0.15	0.55	0.33	0.24	0.96	0.67	1.07	0.36	0.2	0.6	0.44	0.553333	0.51	0.7	0.413333
rna-XM_027284959.1	gene-LOC104918732	LOC104918732	uncharacterized LOC104918732	0.27	0.25	0.39	0.32	0.39	0.48	0.15	0.36	0.33	0.56	0.13	0.39	0.303333	0.396667	0.28	0.36
rna-XM_027285318.1	gene-LOC104918733	LOC104918733	cAMP-specific 3',5'-cyclic phosphodiesterase 4C, transcript variant X1	0.1	0	0	0.18	0	0	0	0.02	0	0	0	0.24	0.033333	0.06	0.006667	0.08
rna-XM_027285319.1	gene-LOC104918733	LOC104918733	cAMP-specific 3',5'-cyclic phosphodiesterase 4C, transcript variant X2	1.31	2.15	1.31	0.92	1.5	2.65	1.43	1.32	1.66	1.68	1.42	0.62	1.59	1.69	1.47	1.24
rna-XM_027285320.1	gene-LOC104918733	LOC104918733	cAMP-specific 3',5'-cyclic phosphodiesterase 4C, transcript variant X3	0	0	0	0.06	0	0	0.09	0	0.07	0.12	0.11	0	0	0.02	0.053333	0.076667
rna-XM_010730583.3	gene-LOC104918736	LOC104918736	glycoprotein hormone beta-5, transcript variant X1	0.06	0	0	0	0	0	0	0	0	0.07	0	0	0.02	0	0	0.023333
rna-XM_027278070.1	gene-LOC104918736	LOC104918736	glycoprotein hormone beta-5, transcript variant X2	0.04	0	0	0	0	0.23	0	0	0	0	0	0	0.013333	0.076667	0	0
rna-XM_010730580.3	gene-LOC104918737	LOC104918737	heparan sulfate glucosamine 3-O-sulfotransferase 4	0	0	0	0	0	0	0	0	0	0	0	0	0	0	0	0
rna-XM_010730581.3	gene-LOC104918738	LOC104918738	galanin receptor type 2	0	0	0	0	0	0	0	0	0	0	0	0	0	0	0	0
rna-XM_010730585.3	gene-LOC104918741	LOC104918741	homeobox protein unc-4, transcript variant X1	0.05	0	0	0	0	0	0	0	0	0	0	0.04	0.016667	0	0	0.013333
rna-XM_027285707.1	gene-LOC104918741	LOC104918741	homeobox protein unc-4, transcript variant X2	0	0.05	0	0	0.05	0	0	0	0	0	0.05	0	0.016667	0.016667	0	0.016667
rna-XM_027290318.1	gene-LOC104918747	LOC104918747	spindlin-1, transcript variant X1	11.14	9.24	9.18	10.52	13.19	11.13	11.33	9.88	10.33	11.1	12	10.02	9.85333	11.6133	10.5133	11.04
rna-XM_027290319.1	gene-LOC104918747	LOC104918747	spindlin-1, transcript variant X2	0.26	1.39	2.51	2.3	0.56	0.79	0.66	1.71	1.97	1.5	0.21	1.48	1.38667	1.21667	1.44667	1.06333
rna-XM_010730594.3	gene-LOC104918749	LOC104918749	mast cell protease 1A	9.3	11.57	3.79	7.03	9.6	22.73	21.8	16.04	10.79	17.59	21.88	11.69	8.22	13.12	16.21	17.0533
rna-XM_019272389.2	gene-LOC104918750	LOC104918750	trypsin-3, transcript variant X1	0.68	0.52	0.85	0.13	0.34	0.55	0.46	1.27	1.58	0.54	0.4	0.54	0.683333	0.34	1.10333	0.493333
rna-XM_027290635.1	gene-LOC104918750	LOC104918750	trypsin-3, transcript variant X2	0	0.31	0.28	0.53	0.34	0.55	0.77	0.54	0.23	0.36	0.6	0.54	0.196667	0.473333	0.513333	0.5
rna-XM_019266242.2	gene-LOC104918763	LOC104918763	uncharacterized LOC104918763, transcript variant X1	0.03	0.02	0.02	0.02	0	0.14	0.02	0	0.53	0.01	0.02	0.09	0.023333	0.053333	0.183333	0.04
rna-XM_019266243.2	gene-LOC104918763	LOC104918763	uncharacterized LOC104918763, transcript variant X2	0	0	0	0	0	0	0	0	0	0	0	0	0	0	0	0
rna-XM_019272382.2	gene-LOC104918767	LOC104918767	duodenase-1	1.23	4.24	0.38	1.58	2.98	0.46	2.59	0.56	2.76	0.78	1.82	0.92	1.95	1.67333	1.97	1.17333
rna-XM_027290240.1	gene-LOC104918768	LOC104918768	transmembrane protease serine 9	3.61	4.67	2.51	2.63	3.16	4.19	4.16	2.23	5.03	3.4	3.58	3.57	3.59667	3.32667	3.80667	3.51667
rna-XM_027290241.1	gene-LOC104918769	LOC104918769	mast cell protease 1A	3.33	4.15	2.65	1.99	2.9	3.27	4.31	3.75	3.51	2.73	2.39	1.01	3.37667	2.72	3.85667	2.04333
rna-XM_027278493.1	gene-LOC104918773	LOC104918773	glycine N-acyltransferase	0	0	0.18	0	0	0.15	0.22	0	0	0.14	0	0	0.06	0.05	0.073333	0.046667
rna-XM_019255096.2	gene-LOC104918775	LOC104918775	granzyme B(G,H)	24.89	25.86	27.09	24.03	27.55	24.7	24.83	22.4	32.57	30.98	30.22	20.33	25.9467	25.4267	26.6	27.1767
rna-XM_019255091.2	gene-LOC104918777	LOC104918777	cartilage intermediate layer protein 1	0	0	0	0	0	0.01	0	0.01	0	0	0	0	0	0.003333	0.003333	0
rna-XM_010730636.3	gene-LOC104918782	LOC104918782	protein FAM3C	35.25	42.08	38.79	33.79	39.69	33.91	42.97	37.34	35.51	31.21	34.58	37.37	38.7067	35.7967	38.6067	34.3867
rna-XM_027278496.1	gene-LOC104918783	LOC104918783	coiled-coil domain-containing protein 177	0	0	0	0	0	0	0	0	0	0	0	0	0	0	0	0
rna-XM_027272034.1	gene-LOC104918784	LOC104918784	inosine-5'-monophosphate dehydrogenase 1b	0	0	0	0	0	0	0	0	0	0	0	0	0	0	0	0
rna-XM_027291878.1	gene-LOC104918785	LOC104918785	Transmembrane protein 53	2.25	2.61	3.25	3.45	2.88	2.29	2.49	2.01	2.7	3.44	2.77	4.5	2.70333	2.87333	2.4	3.57
gene-LOC104918787	gene-LOC104918787	LOC104918787	-	0.19	0	0	0	0	0	0	0.04	0	0	0	0	0.063333	0	0.013333	0
rna-XM_010730648.3	gene-LOC104918788	LOC104918788	leucine-rich repeat-containing protein 4	0.02	0.02	0	0	0	0.02	0	0.11	0.06	0.08	0.04	0.04	0.013333	0.006667	0.056667	0.053333
rna-XM_010730650.3	gene-LOC104918791	LOC104918791	uncharacterized LOC104918791	0.01	0.01	0.01	0	0	0.08	0.01	0	0.06	0.03	0	0.01	0.01	0.026667	0.023333	0.013333
rna-XM_019273134.2	gene-LOC104918792	LOC104918792	sortilin-like	12.77	11.07	10.92	15.8	17.94	18.37	13.42	8.52	13.07	15.38	16.78	18.31	11.5867	17.37	11.67	16.8233
rna-XM_010730652.3	gene-LOC104918793	LOC104918793	proline-rich transmembrane protein 4, transcript variant X1	3.82	2.79	2.65	3.78	3.99	4.06	3.89	3.85	3.93	3.93	3.38	3.07	3.08667	3.94333	3.89	3.46
rna-XM_019273153.2	gene-LOC104918793	LOC104918793	proline-rich transmembrane protein 4, transcript variant X2	0	0	0	0.69	0.21	0	0.51	0	0	0.12	0.2	0.14	0	0.3	0.17	0.153333
rna-XM_010730655.3	gene-LOC104918795	LOC104918795	hepatocyte growth factor, transcript variant X2	0.05	0.07	0	0.03	0.11	0.06	0.06	0.01	0	0.06	0.01	0.01	0.04	0.066667	0.023333	0.026667
rna-XM_027272186.1	gene-LOC104918795	LOC104918795	hepatocyte growth factor, transcript variant X1	0	0	0	0	0	0	0	0	0.12	0	0	0	0	0	0.04	0
rna-XM_019266779.2	gene-LOC104918796	LOC104918796	voltage-dependent calcium channel subunit alpha-2/delta-1, transcript variant X1	0.31	0	0	0	0.38	0.89	0.7	0.14	0	0.59	0	0.53	0.103333	0.423333	0.28	0.373333
rna-XM_027272178.1	gene-LOC104918796	LOC104918796	voltage-dependent calcium channel subunit alpha-2/delta-1, transcript variant X2	0.33	0.65	0.4	0	0.52	0.31	0.14	0.28	0.25	0	0.26	0	0.46	0.276667	0.223333	0.086667
rna-XM_027272179.1	gene-LOC104918796	LOC104918796	voltage-dependent calcium channel subunit alpha-2/delta-1, transcript variant X3	0	0	0	0.71	0	0	0.15	0.14	0.77	0.22	0.28	0	0	0.236667	0.353333	0.166667
rna-XM_027285434.1	gene-LOC104918797	LOC104918797	uncharacterized protein C16orf52 homolog B	0.35	2.74	1.94	1.57	0	0.17	0.73	0	0.37	0.86	2.06	1.09	1.67667	0.58	0.366667	1.33667
rna-XM_010730658.3	gene-LOC104918798	LOC104918798	cytochrome b-c1 complex subunit 2, mitochondrial	27.88	29.07	28.68	29.94	30.78	26.12	27.26	30.61	25.65	26.76	31.07	31.95	28.5433	28.9467	27.84	29.9267
rna-XM_027285764.1	gene-LOC104918799	LOC104918799	kelch-like protein diablo, transcript variant X1	0.26	0	0	0.4	0.47	0.52	0	0	0.83	0.84	0	1.35	0.086667	0.463333	0.276667	0.73
rna-XM_027285765.1	gene-LOC104918799	LOC104918799	kelch-like protein diablo, transcript variant X2	5.79	5.57	5.18	4.79	6.33	5.99	5.73	5.37	6.18	4.95	6.75	5.05	5.51333	5.70333	5.76	5.58333
rna-XM_010730664.3	gene-LOC104918801	LOC104918801	nucleolar and coiled-body phosphoprotein 1, transcript variant X1	0	0	0	0	0.65	0	0	0	0	0	0	0	0	0.216667	0	0
rna-XM_019270189.2	gene-LOC104918801	LOC104918801	nucleolar and coiled-body phosphoprotein 1, transcript variant X2	0	0.53	2.94	0.76	1.31	2.31	0.47	2.21	2.72	0	0.9	0	1.15667	1.46	1.8	0.3
rna-XM_019270190.2	gene-LOC104918801	LOC104918801	nucleolar and coiled-body phosphoprotein 1, transcript variant X3	6.21	0	0	0.98	3.64	0	2.09	0	0	2.27	1.45	3.89	2.07	1.54	0.696667	2.53667
rna-XM_019253296.2	gene-LOC104918802	LOC104918802	peroxisomal membrane protein PMP34	2.43	4.57	4.66	2.15	1.82	3.27	3.46	3.22	1.98	2	3.5	4.8	3.88667	2.41333	2.88667	3.43333
rna-XM_010730665.3	gene-LOC104918805	LOC104918805	ras-related C3 botulinum toxin substrate 1	33.31	49.41	54.05	48.45	51.24	45.59	42.04	41.22	36.45	46.43	55.16	51.79	45.59	48.4267	39.9033	51.1267
rna-XM_010730666.3	gene-LOC104918806	LOC104918806	small integral membrane protein 10-like protein 2A	4.39	4.69	4.9	4.32	4.93	4.47	5.42	5.93	4.6	5.49	5.83	6.38	4.66	4.57333	5.31667	5.9
rna-XM_019253235.2	gene-LOC104918807	LOC104918807	cytohesin-3, transcript variant X2	0.78	0.55	0.76	0.21	0.57	1.26	0.66	0.6	0.9	0.68	1.33	0.37	0.696667	0.68	0.72	0.793333
rna-XM_027285848.1	gene-LOC104918807	LOC104918807	cytohesin-3, transcript variant X1	0.53	0.62	0.71	1.04	1.37	0.97	0.99	0.55	1.29	1.52	0.91	0.54	0.62	1.12667	0.943333	0.99
rna-XM_010730668.3	gene-LOC104918808	LOC104918808	voltage-dependent calcium channel gamma-5 subunit	0	0	0	0	0	0	0	0	0	0	0	0	0	0	0	0
rna-XM_010730669.3	gene-LOC104918809	LOC104918809	uncharacterized LOC104918809	0	0	0	0	0	0	0	0	1.3	0	0	0	0	0	0.433333	0
rna-XM_027285045.1	gene-LOC104918810	LOC104918810	protein kinase C alpha type, transcript variant X1	0	0	0	0	0	0	0	0	0	0	0	0	0	0	0	0
rna-XM_027285046.1	gene-LOC104918810	LOC104918810	protein kinase C alpha type, transcript variant X2	0	0	0	0	0	0	0	0	0	0	0	0	0	0	0	0
rna-XM_019277286.2	gene-LOC104918811	LOC104918811	axin-2	0.07	0.07	0.06	0.13	0.1	0.12	0.24	0.2	0.16	0.06	0.1	0.2	0.066667	0.116667	0.2	0.12
rna-XM_010730672.3	gene-LOC104918813	LOC104918813	testis-expressed protein 2, transcript variant X1	5.06	4.78	4.84	5.72	6.98	6.95	7.04	5.23	5.7	7.09	8.32	6.39	4.89333	6.55	5.99	7.26667
rna-XM_010730673.3	gene-LOC104918813	LOC104918813	testis-expressed protein 2, transcript variant X2	0.34	0.14	0.17	0.3	0.16	0.14	0	0.24	0.44	1.08	0.53	0.9	0.216667	0.2	0.226667	0.836667
rna-XM_027285526.1	gene-LOC104918816	LOC104918816	E3 SUMO-protein ligase CBX4	10.17	8.35	8.68	9.54	7.64	7.94	8.52	10.37	11.14	7.68	9.58	8.54	9.06667	8.37333	10.01	8.6
rna-XM_010730678.3	gene-LOC104918817	LOC104918817	aquaporin-8	0	0	0	0	0	0	0.09	0	0	0	0	0	0	0	0.03	0
rna-XM_019277279.2	gene-LOC104918819	LOC104918819	rho GTPase-activating protein 17, transcript variant X1	3.22	3.54	4.4	5.24	7.65	6.54	4.98	3.41	5.76	6.64	5.09	5.22	3.72	6.47667	4.71667	5.65
rna-XM_019277280.2	gene-LOC104918819	LOC104918819	rho GTPase-activating protein 17, transcript variant X2	0	0	0	0	0	0	0	0	0	0	0	0	0	0	0	0
rna-XM_019277281.2	gene-LOC104918819	LOC104918819	rho GTPase-activating protein 17, transcript variant X3	0.84	0.32	0	1.53	0	0.69	1.42	0.47	0	0	0	0.92	0.386667	0.74	0.63	0.306667
rna-XM_019277282.2	gene-LOC104918819	LOC104918819	rho GTPase-activating protein 17, transcript variant X5	3.97	4.36	0	0	0.91	2.48	1.46	0	0	0	0	2.15	2.77667	1.13	0.486667	0.716667
rna-XM_027285524.1	gene-LOC104918819	LOC104918819	rho GTPase-activating protein 17, transcript variant X4	0.23	0	0	0	0.26	0	0	0	0	0	0	0	0.076667	0.086667	0	0
rna-XM_027277994.1	gene-LOC104918821	LOC104918821	uncharacterized LOC104918821	0.16	0	0.1	0	0.38	0.18	0.19	0.15	0.18	0.15	0.15	0.17	0.086667	0.186667	0.173333	0.156667
rna-XM_010730687.3	gene-LOC104918824	LOC104918824	hydroxyacylglutathione hydrolase-like protein, transcript variant X1	2.77	1.44	2.75	1.84	2.4	3.28	2.06	3.2	3.11	2.95	1.75	2.2	2.32	2.50667	2.79	2.3
rna-XM_019277247.2	gene-LOC104918824	LOC104918824	hydroxyacylglutathione hydrolase-like protein, transcript variant X2	0.53	0	0.59	0	0.37	0	1.17	0	0	0	0.67	0.26	0.373333	0.123333	0.39	0.31
rna-XM_027285531.1	gene-LOC104918824	LOC104918824	hydroxyacylglutathione hydrolase-like protein, transcript variant X3	0	0.57	0.19	0.59	0	0	0.23	0.54	0.17	0	0	0.25	0.253333	0.196667	0.313333	0.083333
rna-XM_010730697.3	gene-LOC104918834	LOC104918834	NADPH oxidase organizer 1	0	0	0	0	0	0	0	0	0.11	0	0	0	0	0	0.036667	0
rna-XM_010730698.3	gene-LOC104918836	LOC104918836	glucose-induced degradation protein 4 homolog	4.11	3.2	3.36	2.96	4.45	3.92	4.23	4.85	4.21	3.34	3.96	4.2	3.55667	3.77667	4.43	3.83333
rna-XM_027285525.1	gene-LOC104918840	LOC104918840	extracellular serine/threonine protein kinase FAM20C	0.08	0.01	0.08	0.13	0.16	0.09	0.14	0.15	0.14	0.07	0.1	0.19	0.056667	0.126667	0.143333	0.12
rna-XM_027285208.1	gene-LOC104918841	LOC104918841	brain-specific angiogenesis inhibitor 1-associated protein 2-like protein 1	0.42	0.11	0.21	0.04	0.09	0.13	0.11	0.14	0.04	0	0.05	0.12	0.246667	0.086667	0.096667	0.056667
rna-XM_010730710.3	gene-LOC104918844	LOC104918844	parvalbumin beta-like, transcript variant X1	0	0	0	0	0	0	0	0	0	0	0	0	0	0	0	0
rna-XM_019265130.2	gene-LOC104918844	LOC104918844	parvalbumin beta-like, transcript variant X2	0	0	0	0	0	0	0	0	0	0	0	0	0	0	0	0
rna-XM_010730712.2	gene-LOC104918845	LOC104918845	parvalbumin beta 4	0.98	0.25	0.39	0.12	0	0.12	0.25	0	0.59	0	0.13	0.12	0.54	0.08	0.28	0.083333
rna-XM_010730713.3	gene-LOC104918846	LOC104918846	parvalbumin beta-like	0	0	0.13	0	0	0	0.26	0	0.36	0	0.13	0	0.043333	0	0.206667	0.043333
rna-XM_010730714.3	gene-LOC104918847	LOC104918847	parvalbumin, thymic CPV3-like	0	0	0	0	0	0	0	0	0	0	0	0	0	0	0	0
rna-XM_010730717.3	gene-LOC104918849	LOC104918849	putative AC transposase	4.96	4.43	3.98	3.49	4.35	3.63	4.71	3.92	4.37	4.52	4.52	3.71	4.45667	3.82333	4.33333	4.25
rna-XM_010730718.3	gene-LOC104918850	LOC104918850	voltage-dependent calcium channel gamma-4 subunit	0.15	0.07	0.21	0.13	0.08	0.13	0.17	0.04	0.13	0.29	0.02	0.03	0.143333	0.113333	0.113333	0.113333
rna-XM_019277268.2	gene-LOC104918859	LOC104918859	meteorin-like protein	0.05	0	0.13	0.04	0.04	0.04	0.04	0.18	0.2	0	0	0.08	0.06	0.04	0.14	0.026667
rna-XM_019277242.2	gene-LOC104918860	LOC104918860	delphilin, transcript variant X1	0	0	0	0	0	0	0	0	0	0	0	0	0	0	0	0
rna-XM_019277243.2	gene-LOC104918860	LOC104918860	delphilin, transcript variant X2	0	0	0	0	0	0	0	0	0	0	0	0	0	0	0	0
rna-XM_019277244.2	gene-LOC104918860	LOC104918860	delphilin, transcript variant X3	0	0	0	0	0	0	0	0	0	0	0	0	0	0	0	0
rna-XM_019277245.2	gene-LOC104918860	LOC104918860	delphilin, transcript variant X4	0	0	0	0	0	0	0	0	0	0	0	0	0	0	0	0
rna-XM_019277246.2	gene-LOC104918860	LOC104918860	delphilin, transcript variant X5	0.03	0.01	0.01	0	0.02	0.04	0.03	0.03	0.02	0.06	0.03	0	0.016667	0.02	0.026667	0.03
gene-LOC104918863	gene-LOC104918863	LOC104918863	-	0.06	0	0	0	0	0	0.15	0	0	0	0	0.05	0.02	0	0.05	0.016667
rna-XM_027285528.1	gene-LOC104918865	LOC104918865	zinc finger protein 32	2.71	1.93	2.45	1.18	2.14	2.28	2.17	2.49	2.08	2.76	2.72	1.97	2.36333	1.86667	2.24667	2.48333
rna-XM_027285523.1	gene-LOC104918866	LOC104918866	testis-expressed protein 2	0	0	0	0	0	0	0	0	0	0	0	0	0	0	0	0
rna-XM_027285521.1	gene-LOC104918868	LOC104918868	retinoic acid-induced protein 1, transcript variant X1	0.03	0	0	0	0	0	0.01	0	0.01	0	0	0	0.01	0	0.006667	0
rna-XM_027285522.1	gene-LOC104918868	LOC104918868	retinoic acid-induced protein 1, transcript variant X2	0	0	0	0	0	0	0	0	0	0	0	0	0	0	0	0
rna-XM_019277255.2	gene-LOC104918869	LOC104918869	neuronal pentraxin-2	0.05	0.09	0.03	0.11	0.14	0.22	0.05	0.08	0.17	0.08	0.16	0.04	0.056667	0.156667	0.1	0.093333
rna-XM_010730739.3	gene-LOC104918870	LOC104918870	tectonin beta-propeller repeat-containing protein 1	0.66	0.7	0.55	0.86	0.69	0.87	0.8	0.65	0.86	0.75	0.81	0.67	0.636667	0.806667	0.77	0.743333
rna-XM_010730740.3	gene-LOC104918871	LOC104918871	serine/threonine-protein kinase LMTK2, transcript variant X1	0.05	0.4	0	0	0.15	0	0.03	0	0.17	0	0	0	0.15	0.05	0.066667	0
rna-XM_027285207.1	gene-LOC104918871	LOC104918871	serine/threonine-protein kinase LMTK2, transcript variant X2	4.12	3.96	3.01	3.94	4.28	3.76	3.59	3.18	3.41	3.98	4.35	4	3.69667	3.99333	3.39333	4.11
rna-XM_019270232.2	gene-LOC104918873	LOC104918873	stonin-1	0.03	0.02	0.03	0.03	0	0	0.03	0.03	0.19	0	0.03	0.03	0.026667	0.01	0.083333	0.02
rna-XM_010730745.3	gene-LOC104918876	LOC104918876	myocardin-related transcription factor B, transcript variant X10	0	0	0	0	0	0.71	1.08	0	0	0.2	0	0.72	0	0.236667	0.36	0.306667
rna-XM_019253287.2	gene-LOC104918876	LOC104918876	myocardin-related transcription factor B, transcript variant X2	0.27	0.15	0.4	0.32	0.25	0.53	0.36	0.15	0.23	0.2	0.21	0.09	0.273333	0.366667	0.246667	0.166667
rna-XM_019253288.2	gene-LOC104918876	LOC104918876	myocardin-related transcription factor B, transcript variant X3	0	0	0	0	0.22	0	0.33	0	0	0.49	0	0.41	0	0.073333	0.11	0.3
rna-XM_019253289.2	gene-LOC104918876	LOC104918876	myocardin-related transcription factor B, transcript variant X4	0	0	0.28	0.13	0	0.14	0	0	0.44	0	0	0.19	0.093333	0.09	0.146667	0.063333
rna-XM_019253290.2	gene-LOC104918876	LOC104918876	myocardin-related transcription factor B, transcript variant X5	0.67	1.16	0.76	0.45	0.73	0	0	0.7	0.01	0.1	2.12	0.79	0.863333	0.393333	0.236667	1.00333
rna-XM_019253293.2	gene-LOC104918876	LOC104918876	myocardin-related transcription factor B, transcript variant X8	0	0	0	0.02	0.23	0	0.42	0	0	0	0	0	0	0.083333	0.14	0
rna-XM_019253294.2	gene-LOC104918876	LOC104918876	myocardin-related transcription factor B, transcript variant X9	0	0	0	0	0	0.23	0	0	0	0	0	0	0	0.076667	0	0
rna-XM_027289156.1	gene-LOC104918876	LOC104918876	myocardin-related transcription factor B, transcript variant X1	0	0.19	0.02	0.91	0	0.49	0.63	0	0	1.3	0.88	0.14	0.07	0.466667	0.21	0.773333
rna-XM_027289157.1	gene-LOC104918876	LOC104918876	myocardin-related transcription factor B, transcript variant X6	5.83	5.14	4.28	3.39	3.59	3.92	2.09	3.58	6.29	5.42	5.3	4.74	5.08333	3.63333	3.98667	5.15333
rna-XM_027289158.1	gene-LOC104918876	LOC104918876	myocardin-related transcription factor B, transcript variant X7	5.39	4.48	3.53	3.58	4.56	4.63	4	5.96	4.55	3.57	4.26	4.43	4.46667	4.25667	4.83667	4.08667
rna-XM_027289190.1	gene-LOC104918877	LOC104918877	desumoylating isopeptidase 1	0	0	0	0	4.97	0	0	0	0	0	0	0	0	1.65667	0	0
rna-XM_027289180.1	gene-LOC104918879	LOC104918879	GTPase IMAP family member 4-like, transcript variant X1	0	0	0	0	0	0	0	0	0	0	0	0	0	0	0	0
rna-XM_027289181.1	gene-LOC104918879	LOC104918879	GTPase IMAP family member 4-like, transcript variant X2	0.35	0.39	0.4	0.5	0.35	0.58	0.64	0.38	0.69	0.29	0.76	0.91	0.38	0.476667	0.57	0.653333
rna-XM_027289185.1	gene-LOC104918881	LOC104918881	chromobox protein homolog 7, transcript variant X1	1.89	0.8	1.32	1.16	1.09	2.29	1.55	1.69	1.65	1.21	1.88	1.11	1.33667	1.51333	1.63	1.4
rna-XM_027289186.1	gene-LOC104918881	LOC104918881	chromobox protein homolog 7, transcript variant X2	0	0.67	0	0	0.39	0	0	0	0	0	0	0	0.223333	0.13	0	0
rna-XM_019269533.2	gene-LOC104918882	LOC104918882	histone acetyltransferase p300, transcript variant X3	4.85	4.28	4.73	4.77	4.27	5.62	5.06	6.49	5.09	4.42	4.82	4.68	4.62	4.88667	5.54667	4.64
rna-XM_019269534.2	gene-LOC104918882	LOC104918882	histone acetyltransferase p300, transcript variant X4	2.76	1.53	1.82	1.64	2.94	1.5	1.43	0.55	1.52	2.29	1.86	1.33	2.03667	2.02667	1.16667	1.82667
rna-XM_027289149.1	gene-LOC104918882	LOC104918882	histone acetyltransferase p300, transcript variant X1	0	0	0	0.24	0	0	0	0.12	0.06	0	0.02	0	0	0.08	0.06	0.006667
rna-XM_027289150.1	gene-LOC104918882	LOC104918882	histone acetyltransferase p300, transcript variant X2	0	0	0	0.03	0	0	0	0.01	0.1	0	0.12	0.11	0	0.01	0.036667	0.076667
rna-XM_010730756.3	gene-LOC104918883	LOC104918883	lethal(3)malignant brain tumor-like protein 2, transcript variant X1	0	0.19	0.33	0	0.09	0	0.1	0	0	0.09	0.18	0.18	0.173333	0.03	0.033333	0.15
rna-XM_019269524.2	gene-LOC104918883	LOC104918883	lethal(3)malignant brain tumor-like protein 2, transcript variant X3	0	0.12	0	0	0	0	0	0.1	0.07	0.11	0	0	0.04	0	0.056667	0.036667
rna-XM_027289172.1	gene-LOC104918883	LOC104918883	lethal(3)malignant brain tumor-like protein 2, transcript variant X2	2.7	2.2	2.63	1.93	2.63	2.24	2.11	2.4	2.39	1.65	2.05	1.78	2.51	2.26667	2.3	1.82667
rna-XM_027289173.1	gene-LOC104918884	LOC104918884	chondroadherin-like protein	0.02	0	0.24	0.06	0.08	0.02	0.74	0	0.1	0	0.02	0.64	0.086667	0.053333	0.28	0.22
rna-XM_010730758.3	gene-LOC104918885	LOC104918885	thyrotroph embryonic factor, transcript variant X1	7.52	9.05	10.54	16.4	9.89	9.06	6.86	5.2	6.48	6.41	5.04	14.37	9.03667	11.7833	6.18	8.60667
rna-XM_010730761.3	gene-LOC104918885	LOC104918885	thyrotroph embryonic factor, transcript variant X2	0	0.51	0.43	0.87	0.19	0.13	0	0	0.25	0.23	0.31	0.11	0.313333	0.396667	0.083333	0.216667
rna-XM_027281659.1	gene-LOC104918886	LOC104918886	epithelial splicing regulatory protein 2, transcript variant X1	0	0	0	0	0	0	0	0	0	0	0	0	0	0	0	0
rna-XM_027281660.1	gene-LOC104918886	LOC104918886	epithelial splicing regulatory protein 2, transcript variant X2	0.33	0.38	0.68	0.66	1.25	0.36	0.32	0.45	0.48	0.43	0.4	0.54	0.463333	0.756667	0.416667	0.456667
rna-XM_027281661.1	gene-LOC104918886	LOC104918886	epithelial splicing regulatory protein 2, transcript variant X3	0	0	0	0	0	0	0	0	0	0	0	0	0	0	0	0
rna-XM_027281662.1	gene-LOC104918886	LOC104918886	epithelial splicing regulatory protein 2, transcript variant X4	0.08	0	0	0.32	0.52	0.07	0.2	0.22	0.15	0.21	0.31	0.08	0.026667	0.303333	0.19	0.2
rna-XM_019269554.2	gene-LOC104918888	LOC104918888	aconitate hydratase, mitochondrial	18.46	17.24	17.41	16.47	18.15	17	16.36	17.05	15.08	15.8	19.65	22.2	17.7033	17.2067	16.1633	19.2167
rna-XM_010730766.3	gene-LOC104918889	LOC104918889	cold shock domain-containing protein C2	0.02	0.02	0.06	0	0.08	0.13	0.12	0.02	0.04	0.1	0.02	0.02	0.033333	0.07	0.06	0.046667
rna-XM_010730767.3	gene-LOC104918890	LOC104918890	BTB/POZ domain-containing protein KCTD5, transcript variant X1	5.96	4.87	6.07	4.21	4.76	6.44	6.3	5.16	5.26	4.64	4.75	4.54	5.63333	5.13667	5.57333	4.64333
rna-XM_010730768.3	gene-LOC104918890	LOC104918890	BTB/POZ domain-containing protein KCTD5, transcript variant X2	1.51	1.41	1.69	1.99	0.98	1.41	1.6	0.58	1.52	1.35	1.15	0.69	1.53667	1.46	1.23333	1.06333
rna-XM_010730770.3	gene-LOC104918891	LOC104918891	28 kDa heat- and acid-stable phosphoprotein	45.06	45.56	49.59	38.64	42.63	39.38	46.73	49.66	39.56	45.95	51.05	50.21	46.7367	40.2167	45.3167	49.07
rna-XM_010730771.3	gene-LOC104918892	LOC104918892	SH3 domain-binding protein 1	133.7	128.65	126.84	97.32	135.32	111.87	119.28	118.02	117.25	114.97	114.09	108.65	129.73	114.837	118.183	112.57
rna-XM_010730772.3	gene-LOC104918893	LOC104918893	cdc42 effector protein 1	12.73	13.18	11.86	16.17	16.92	18.15	13.9	13.82	16.19	16.88	14.61	12.86	12.59	17.08	14.6367	14.7833
rna-XM_019269545.2	gene-LOC104918894	LOC104918894	probable endonuclease 4, transcript variant X1	6.06	9.29	8.98	0	3.9	3.38	6.14	7.07	4.79	3.76	4.59	4.22	8.11	2.42667	6	4.19
rna-XM_019269546.2	gene-LOC104918894	LOC104918894	probable endonuclease 4, transcript variant X2	0.7	0.5	1.6	2	0.93	2.42	0.82	0.99	1.72	0.79	3.47	0.98	0.933333	1.78333	1.17667	1.74667
rna-XM_019269547.2	gene-LOC104918894	LOC104918894	probable endonuclease 4, transcript variant X3	0.76	0.45	0.52	2.63	1.39	0	0.63	0	0.96	1.55	1.14	0.64	0.576667	1.34	0.53	1.11
rna-XM_010730776.3	gene-LOC104918897	LOC104918897	casein kinase I-like, transcript variant X1	0.67	0.57	0.62	0.88	0.93	1.18	0.73	0.85	0.98	1.09	0.95	0.63	0.62	0.996667	0.853333	0.89
rna-XM_019269472.2	gene-LOC104918897	LOC104918897	casein kinase I-like, transcript variant X2	0.23	0	0.3	0.15	0	0.17	0.21	0.16	0	0	0.16	0	0.176667	0.106667	0.123333	0.053333
rna-XM_027289444.1	gene-LOC104918905	LOC104918905	DNA repair endonuclease XPF	0.36	0.11	0	0.06	0.06	0.07	0.19	0.32	0.07	0.24	0.07	0.11	0.156667	0.063333	0.193333	0.14
rna-XM_010730790.3	gene-LOC104918908	LOC104918908	forkhead box protein J1-B, transcript variant X1	0	0	0	0	0	0	0	0	0	0	0	0	0	0	0	0
rna-XM_027289179.1	gene-LOC104918908	LOC104918908	forkhead box protein J1-B, transcript variant X2	0.06	0.05	0.09	0	0	0	0.05	0.06	0.02	0	0.06	0.1	0.066667	0	0.043333	0.053333
rna-XM_010730792.3	gene-LOC104918909	LOC104918909	inactive rhomboid protein 1, transcript variant X5	8.9	12.99	20.54	9.77	21.53	33.28	14.3	21.33	14.45	15.35	24.18	4.25	14.1433	21.5267	16.6933	14.5933
rna-XM_019278605.2	gene-LOC104918909	LOC104918909	inactive rhomboid protein 1, transcript variant X1	0	0	0	0	0	0	0	0	0	0	0	0	0	0	0	0
rna-XM_019278615.2	gene-LOC104918909	LOC104918909	inactive rhomboid protein 1, transcript variant X3	11.32	12.62	15.1	12.58	18.91	12.51	16.67	14.51	12.14	14.82	19.9	14.6	13.0133	14.6667	14.44	16.44
rna-XM_019278620.2	gene-LOC104918909	LOC104918909	inactive rhomboid protein 1, transcript variant X4	2.38	2.91	2	2.32	1.08	1.77	1.57	4.24	1.17	1.9	1.72	1.23	2.43	1.72333	2.32667	1.61667
rna-XM_027289167.1	gene-LOC104918909	LOC104918909	inactive rhomboid protein 1, transcript variant X2	0	0	0	0	0	0	0	0	0	0	0	0	0	0	0	0
rna-XM_010730795.3	gene-LOC104918910	LOC104918910	hemoglobin subunit alpha-D, transcript variant X1	8.64	6.81	10.38	18.29	3.64	14.28	9.16	4.27	11.84	9.46	1.72	13.94	8.61	12.07	8.42333	8.37333
rna-XM_019278281.2	gene-LOC104918910	LOC104918910	hemoglobin subunit alpha-D, transcript variant X2	0	4.26	2.12	2.7	2.17	5.88	1.84	3.57	0	0	4.11	8.02	2.12667	3.58333	1.80333	4.04333
rna-XM_010730796.3	gene-LOC104918911	LOC104918911	hemoglobin subunit beta-2	3965.06	5598.71	4444.47	10125.9	2416.06	2965.02	3568.05	1780.57	2003.47	2328.06	2132.71	7847.87	4669.41	5168.99	2450.7	4102.88
rna-XM_010730798.3	gene-LOC104918912	LOC104918912	aquaporin-8	0.08	0	0.29	0	0.14	0	0	0.08	0	0	0	0	0.123333	0.046667	0.026667	0
rna-XM_019272048.2	gene-LOC104918914	LOC104918914	rho GTPase-activating protein 17, transcript variant X3	1.93	0.75	1.55	0.66	3.57	3.49	3.75	2.68	2.58	1.67	2.16	1.08	1.41	2.57333	3.00333	1.63667
rna-XM_019272049.2	gene-LOC104918914	LOC104918914	rho GTPase-activating protein 17, transcript variant X4	0.2	0.38	0	0.15	0.11	0.5	0	0	0.13	0.3	0	0	0.193333	0.253333	0.043333	0.1
rna-XM_027289162.1	gene-LOC104918914	LOC104918914	rho GTPase-activating protein 17, transcript variant X1	0.54	1.12	2.9	2.19	1.72	0.14	0.03	0	0.79	0.76	1.11	1.83	1.52	1.35	0.273333	1.23333
rna-XM_027289163.1	gene-LOC104918914	LOC104918914	rho GTPase-activating protein 17, transcript variant X2	0.22	0	0	0.25	0	0	0	0.3	0	0	0	0	0.073333	0.083333	0.1	0
rna-XM_027289164.1	gene-LOC104918914	LOC104918914	rho GTPase-activating protein 17, transcript variant X5	0	0	0	0	0	0	0	0	0	0	0	0	0	0	0	0
rna-XM_010730806.3	gene-LOC104918920	LOC104918920	heparan sulfate glucosamine 3-O-sulfotransferase 6	0	0	0	0	0	0.02	0	0.05	0	0	0	0	0	0.006667	0.016667	0
rna-XM_010730807.3	gene-LOC104918921	LOC104918921	methionine-R-sulfoxide reductase B1-A-like	0.12	0.1	0	0.05	0.41	0.15	0	0.22	0.15	0.21	0.11	0.1	0.073333	0.203333	0.123333	0.14
rna-XM_027289178.1	gene-LOC104918922	LOC104918922	NADPH oxidase organizer 1	0	0.03	0	0	0.08	0	0	0	0	0	0.03	0	0.01	0.026667	0	0.01
rna-XM_010730810.3	gene-LOC104918924	LOC104918924	TOM1-like protein 2, transcript variant X2	1.76	2.13	2.78	2.62	1.95	2.61	1.09	2.13	2.25	2.63	3.33	2.32	2.22333	2.39333	1.82333	2.76
rna-XM_019258762.2	gene-LOC104918924	LOC104918924	TOM1-like protein 2, transcript variant X1	0	0	0	0	0	0	0	0	0	0	0	0	0	0	0	0
rna-XM_019258763.2	gene-LOC104918924	LOC104918924	TOM1-like protein 2, transcript variant X3	0	0	0.06	0	0	0	0	0	0	0	0	0	0.02	0	0	0
rna-XM_019258752.2	gene-LOC104918925	LOC104918925	forkhead box protein L1	5.9	4.48	5.22	3.56	3.93	3.9	4.25	3.78	5.53	5.27	6.07	3.62	5.2	3.79667	4.52	4.98667
rna-XM_010730813.3	gene-LOC104918926	LOC104918926	protein shisa-9B	0.03	0.03	0	0.03	0	0.03	0.03	0	0	0.03	0	0	0.02	0.02	0.01	0.01
rna-XM_019269525.2	gene-LOC104918927	LOC104918927	ran GTPase-activating protein 1, transcript variant X2	6.29	5.31	1.48	2.4	4.29	4.27	0.56	2.88	0.49	3.69	3.78	0.47	4.36	3.65333	1.31	2.64667
rna-XM_027289174.1	gene-LOC104918927	LOC104918927	ran GTPase-activating protein 1, transcript variant X1	0	0	0	0	0	0	0	0	0	0	0	0	0	0	0	0
rna-XM_027289175.1	gene-LOC104918927	LOC104918927	ran GTPase-activating protein 1, transcript variant X3	0	0	0	0	0	0	0	0	0	0	0	0	0	0	0	0
rna-XM_019269526.2	gene-LOC104918928	LOC104918928	zinc finger CCCH domain-containing protein 7B, transcript variant X1	0.28	0.43	0.46	1.03	0.66	1.2	1.06	0.94	0.77	1.09	0.13	0.66	0.39	0.963333	0.923333	0.626667
rna-XM_027289166.1	gene-LOC104918928	LOC104918928	zinc finger CCCH domain-containing protein 7B, transcript variant X2	1.82	0.6	0	0.41	1.55	0	0	0	0	0.14	0.09	0.32	0.806667	0.653333	0	0.183333
rna-XM_019269548.2	gene-LOC104918929	LOC104918929	heat-stable enterotoxin receptor-like	0.66	0.54	0.37	0.6	0.84	0.75	0.85	0.52	0.46	0.64	0.4	0.44	0.523333	0.73	0.61	0.493333
rna-XM_010730819.2	gene-LOC104918932	LOC104918932	transmembrane protein 238	0	0.29	0	0	0	0.27	0.28	0.3	0	0	0.9	0.27	0.096667	0.09	0.193333	0.39
rna-XM_019268299.2	gene-LOC104918935	LOC104918935	amine oxidase [flavin-containing]	0.66	0.67	0.6	0.67	0.75	1.31	0.83	0.45	1.06	0.57	0.94	0.65	0.643333	0.91	0.78	0.72
rna-XM_027289441.1	gene-LOC104918936	LOC104918936	hemoglobin subunit alpha-1-like	0	0.18	0.51	0.57	0	0.09	0	0	0	0.43	0	0.1	0.23	0.22	0	0.176667
rna-XM_019252862.2	gene-LOC104918940	LOC104918940	testis-expressed protein 2, transcript variant X1	0	0	0	0	0.02	0	0	0	0	0	0	0	0	0.006667	0	0
rna-XM_019252863.2	gene-LOC104918940	LOC104918940	testis-expressed protein 2, transcript variant X3	0.03	0.03	0.1	0.14	0	0.01	0.05	0.02	0.04	0.05	0	0.03	0.053333	0.05	0.036667	0.026667
rna-XM_027289161.1	gene-LOC104918940	LOC104918940	testis-expressed protein 2, transcript variant X2	0	0	0	0	0	0	0	0	0	0	0	0	0	0	0	0
rna-XM_010730842.3	gene-LOC104918951	LOC104918951	cytochrome c oxidase subunit 7B, mitochondrial	308.34	298.84	296.52	333.8	295.82	313.13	334.76	284.78	322.37	330.54	332.72	279.34	301.233	314.25	313.97	314.2
rna-XM_027273288.1	gene-LOC104918953	LOC104918953	myosin regulatory light chain 2B, cardiac muscle isoform	0.42	0.13	0.52	0.24	0	0.24	0.13	0	0.35	0.13	0	0	0.356667	0.16	0.16	0.043333
rna-XM_010730862.3	gene-LOC104918968	LOC104918968	nuclear envelope pore membrane protein POM 121	9.36	8.23	8.27	8.09	9.74	8.27	8.47	9.53	8.78	8.04	9.11	9.45	8.62	8.7	8.92667	8.86667
rna-XM_010730865.3	gene-LOC104918971	LOC104918971	AT-rich interactive domain-containing protein 5B-like, transcript variant X1	3.06	1.3	3.56	3.26	3.52	2.52	2.6	3.07	3.45	3.49	3.93	3.16	2.64	3.1	3.04	3.52667
rna-XM_027273329.1	gene-LOC104918971	LOC104918971	AT-rich interactive domain-containing protein 5B-like, transcript variant X2	1.13	3.1	0.79	1.04	0.89	2	1.68	1.33	1	0.97	0.5	1.28	1.67333	1.31	1.33667	0.916667
rna-XM_010730869.3	gene-LOC104918974	LOC104918974	hypothetical protein, transcript variant X1	1.48	0.29	0.37	0.19	0.21	0.52	0.4	0.4	0.48	0.9	0.71	0.15	0.713333	0.306667	0.426667	0.586667
rna-XM_027273565.1	gene-LOC104918974	LOC104918974	hypothetical protein, transcript variant X2	0.36	0.17	0.41	0.13	0.08	0	0.17	0.07	0.28	0.4	0.17	0.27	0.313333	0.07	0.173333	0.28
rna-XM_027273566.1	gene-LOC104918974	LOC104918974	hypothetical protein, transcript variant X3	0	0.11	0	0.07	0	0.23	0.07	0	0.08	0	0.11	0	0.036667	0.1	0.05	0.036667
rna-XM_019265770.2	gene-LOC104918977	LOC104918977	G protein-activated inward rectifier potassium channel 3	0	0	0	0.03	0.08	0	0	0.11	0	0	0.03	0.07	0	0.036667	0.036667	0.033333
rna-XM_010730876.3	gene-LOC104918979	LOC104918979	switch-associated protein 70, transcript variant X1	72.97	47.55	50.7	29.49	34.85	32.99	49.09	56.45	59.87	46.26	38.12	35.68	57.0733	32.4433	55.1367	40.02
rna-XM_027281847.1	gene-LOC104918979	LOC104918979	switch-associated protein 70, transcript variant X2	0.69	2.85	0	2.6	0	0	0	0	0.59	0	0.76	1.46	1.18	0.866667	0.196667	0.74
rna-XM_010730874.3	gene-LOC104918980	LOC104918980	multiple C2 and transmembrane domain-containing protein 1-like	0	0	0	0	0	0	0	0	0	0	0	0	0	0	0	0
rna-XM_010730875.3	gene-LOC104918981	LOC104918981	multiple C2 and transmembrane domain-containing protein 1-like	0	0	0	0	0	0	0	0	0	0	0	0	0	0	0	0
rna-XM_027278069.1	gene-LOC104918982	LOC104918982	tyrosine-protein kinase JAK2	7.97	12.64	11.59	11.64	11.49	12.01	11.94	14.26	12.53	11.51	18.72	17.61	10.7333	11.7133	12.91	15.9467
rna-XM_027277536.1	gene-LOC104918983	LOC104918983	monocarboxylate transporter 13, transcript variant X1	0.32	0	0.52	0.62	0.36	0.38	0.55	0.18	0.34	0.53	0.71	0.83	0.28	0.453333	0.356667	0.69
rna-XM_027277537.1	gene-LOC104918983	LOC104918983	monocarboxylate transporter 13, transcript variant X2	0	0.14	0	0	0.18	0.19	0	0.36	0	0	0	0	0.046667	0.123333	0.12	0
rna-XM_027277490.1	gene-LOC104918986	LOC104918986	zinc finger protein 462, transcript variant X1	8.57	7.46	9.1	6.18	7.81	7.79	9.39	9.35	8.44	9.18	8.44	6.84	8.37667	7.26	9.06	8.15333
rna-XM_027277491.1	gene-LOC104918986	LOC104918986	zinc finger protein 462, transcript variant X2	3.28	1.8	0.68	2.41	2.18	2.51	0.76	1.08	2.36	0.79	1.41	2.57	1.92	2.36667	1.4	1.59
rna-XM_010730886.3	gene-LOC104918989	LOC104918989	prolactin receptor	0.09	0.17	0.09	0.08	0.03	0.03	0.03	0.03	0.08	0.03	0.14	0.1	0.116667	0.046667	0.046667	0.09
rna-XM_010730887.3	gene-LOC104918990	LOC104918990	mucosa-associated lymphoid tissue lymphoma translocation protein 1, transcript variant X1	0.95	0.89	0.28	0.74	1.45	0.14	0.12	0.59	0	0.57	0.77	0.37	0.706667	0.776667	0.236667	0.57
rna-XM_010730888.3	gene-LOC104918990	LOC104918990	mucosa-associated lymphoid tissue lymphoma translocation protein 1, transcript variant X2	6.29	5.81	6.18	5.04	5.35	6.07	7.19	5.83	6.5	5.57	7.78	6.17	6.09333	5.48667	6.50667	6.50667
rna-XM_010730891.3	gene-LOC104918993	LOC104918993	Histidine triad nucleotide-binding protein 2, mitochondrial, transcript variant X2	5.98	5.7	5.67	7.55	6.08	7.95	7.4	8.63	6.65	7.05	8.68	8.54	5.78333	7.19333	7.56	8.09
rna-XM_027275721.1	gene-LOC104918993	LOC104918993	Histidine triad nucleotide-binding protein 2, mitochondrial, transcript variant X1	0.22	0.49	0.11	0.05	0.16	0.4	0.05	0	0.27	0.26	0.17	0.28	0.273333	0.203333	0.106667	0.236667
rna-XM_027275706.1	gene-LOC104918995	LOC104918995	long-chain-fatty-acid--CoA ligase ACSBG2	0.33	0.18	0.05	0.22	0.02	0.04	0.34	0.1	0.11	0.07	0.07	0.15	0.186667	0.093333	0.183333	0.096667
rna-XM_019255702.2	gene-LOC104918996	LOC104918996	long-chain-fatty-acid--CoA ligase ACSBG2	0	0	0	0.02	0	0	0.02	0	0	0	0.02	0	0	0.006667	0.006667	0.006667
rna-XM_010730894.3	gene-LOC104918997	LOC104918997	flavin reductase (NADPH), transcript variant X1	1.16	0	0	0	0.54	2.48	0	0.81	0	0	0	0.2	0.386667	1.00667	0.27	0.066667
rna-XM_010730895.3	gene-LOC104918997	LOC104918997	flavin reductase (NADPH), transcript variant X2	0	0.25	0.3	0	0	0	0.49	0	0.51	1.07	1.01	0	0.183333	0	0.333333	0.693333
rna-XM_019255671.2	gene-LOC104918997	LOC104918997	flavin reductase (NADPH), transcript variant X4	1.09	0.08	1.11	1.35	1.99	0	0	0	0	1.77	0	1.55	0.76	1.11333	0	1.10667
rna-XM_019255672.2	gene-LOC104918997	LOC104918997	flavin reductase (NADPH), transcript variant X5	0	0	0	0	0	0	0	0	0	0	0	0	0	0	0	0
rna-XM_019255673.1	gene-LOC104918997	LOC104918997	flavin reductase (NADPH), transcript variant X6	0	1.28	0	0	0	0	1.53	1.43	0.8	0	0.38	0	0.426667	0	1.25333	0.126667
rna-XM_027278500.1	gene-LOC104918997	LOC104918997	flavin reductase (NADPH), transcript variant X3	0	0.25	0.3	0	0	0	0.49	0	0.51	1.07	1.01	0	0.183333	0	0.333333	0.693333
rna-XM_010730897.3	gene-LOC104918998	LOC104918998	lysosome membrane protein 2, transcript variant X1	17.82	14.2	13.85	17.68	20.02	21.43	16.49	14.94	16.41	16.7	19.48	17.65	15.29	19.71	15.9467	17.9433
rna-XM_010730898.3	gene-LOC104918998	LOC104918998	lysosome membrane protein 2, transcript variant X2	0.09	0.15	0	0.1	0.08	0.28	0	0.43	0.2	0.11	0.2	0.08	0.08	0.153333	0.21	0.13
rna-XM_027275198.1	gene-LOC104918999	LOC104918999	coiled-coil domain-containing protein 158, transcript variant X1	2.54	1.97	2.85	1.99	2.26	1.57	1.16	1.27	1.89	0.59	1.95	2.02	2.45333	1.94	1.44	1.52
rna-XM_027275199.1	gene-LOC104918999	LOC104918999	coiled-coil domain-containing protein 158, transcript variant X3	0	0	0	0	0.21	0	0.26	0.34	0	0.23	0	0	0	0.07	0.2	0.076667
rna-XM_027275203.1	gene-LOC104918999	LOC104918999	coiled-coil domain-containing protein 158, transcript variant X4	0.29	0	0	0	0	0	0	0.43	0.14	0.09	0	0	0.096667	0	0.19	0.03
rna-XR_003461684.1	gene-LOC104918999	LOC104918999	coiled-coil domain-containing protein 158, transcript variant X2	0	0	0	0	0	0	1.2	0	0.38	0.85	0.99	0	0	0	0.526667	0.613333
rna-XM_027275250.1	gene-LOC104919000	LOC104919000	cyclin-G2	13.62	10.51	12.25	12.17	9.27	13.13	13.72	14.53	16.16	14.57	12.32	8.46	12.1267	11.5233	14.8033	11.7833
rna-XM_010730901.3	gene-LOC104919001	LOC104919001	sia-alpha-2,3-Gal-beta-1,4-GlcNAc-R:alpha 2,8-sialyltransferase	0.27	0.19	0.25	0.34	0.25	0.27	0.44	0.22	0.34	0.3	0.22	0.35	0.236667	0.286667	0.333333	0.29
rna-XM_019255697.2	gene-LOC104919002	LOC104919002	ras-related protein Rab-27B	0.35	0.1	0.31	0.15	0.23	0.49	0.42	0.13	0.24	0.4	0.27	0.17	0.253333	0.29	0.263333	0.28
rna-XM_019255687.2	gene-LOC104919003	LOC104919003	UDP-glucuronosyltransferase 2A2, transcript variant X1	6.17	7.08	8.01	11.49	16.54	14.1	11.76	12	9.25	14.47	15.3	9.42	7.08667	14.0433	11.0033	13.0633
rna-XM_019255688.2	gene-LOC104919003	LOC104919003	UDP-glucuronosyltransferase 2A2, transcript variant X2	3.67	3.67	3.16	4.82	7.71	5.96	2.21	4.12	6.06	4.11	5.21	3.1	3.5	6.16333	4.13	4.14
rna-XM_019255690.2	gene-LOC104919003	LOC104919003	UDP-glucuronosyltransferase 2A2, transcript variant X3	0.72	0.14	0.48	1.02	0.74	1	1.82	0.16	0.46	0.94	1.04	1.43	0.446667	0.92	0.813333	1.13667
rna-XM_019255691.2	gene-LOC104919003	LOC104919003	UDP-glucuronosyltransferase 2A2, transcript variant X4	0	0.69	0.19	0	0.36	0	0.38	1.38	0.41	0.65	1.25	0.8	0.293333	0.12	0.723333	0.9
rna-XM_027275234.1	gene-LOC104919003	LOC104919003	UDP-glucuronosyltransferase 2A2, transcript variant X5	0	0	0	0	0	0	0	0	0	0	0	0	0	0	0	0
rna-XM_010730905.3	gene-LOC104919005	LOC104919005	RNA exonuclease 1 homolog, transcript variant X1	0.31	0.32	0.04	0	0	0	0.78	0.88	0.98	0.27	0	0.71	0.223333	0	0.88	0.326667
rna-XM_010730906.3	gene-LOC104919005	LOC104919005	RNA exonuclease 1 homolog, transcript variant X3	0	0	0.63	0	0	0	0	0	0	0.7	0	0	0.21	0	0	0.233333
rna-XM_010730907.3	gene-LOC104919005	LOC104919005	RNA exonuclease 1 homolog, transcript variant X4	3.15	0.28	0	0.28	0	0	0	0	0	0	0.47	0	1.14333	0.093333	0	0.156667
rna-XM_010730909.3	gene-LOC104919005	LOC104919005	RNA exonuclease 1 homolog, transcript variant X5	0.71	0	0	0	0.26	0	0	0	0	0	0	0	0.236667	0.086667	0	0
rna-XM_019255683.2	gene-LOC104919005	LOC104919005	RNA exonuclease 1 homolog, transcript variant X2	0	0.02	0	0	0.78	0.83	0	0.05	0	0	0	0	0.006667	0.536667	0.016667	0
rna-XM_019263743.2	gene-LOC104919007	LOC104919007	transmembrane protein 132C	0.2	0.21	0.14	0.14	0.19	0.31	0.26	0.09	0.25	0.33	0.12	0.08	0.183333	0.213333	0.2	0.176667
rna-XM_019270553.2	gene-LOC104919008	LOC104919008	multiple C2 and transmembrane domain-containing protein 1-like	0	0	0	0	0	0	0	0	0	0	0	0	0	0	0	0
rna-XM_027278497.1	gene-LOC104919012	LOC104919012	serine/threonine-protein phosphatase with EF-hands 2, transcript variant X1	0.02	0	0	0	0	0	0	0	0	0	0	0	0.006667	0	0	0
rna-XM_027278498.1	gene-LOC104919012	LOC104919012	serine/threonine-protein phosphatase with EF-hands 2, transcript variant X2	0	0	0	0	0	0	0	0	0	0	0	0	0	0	0	0
rna-XM_027278499.1	gene-LOC104919012	LOC104919012	serine/threonine-protein phosphatase with EF-hands 2, transcript variant X3	0	0.07	0	0	0	0	0.02	0.05	0.09	0	0	0	0.023333	0	0.053333	0
rna-XM_027291326.1	gene-LOC104919015	LOC104919015	pituitary tumor-transforming gene 1 protein-interacting protein-like, transcript variant X1	23.31	32.16	35.45	40.53	41.05	20	23.07	39.47	20.44	0	23.58	18.91	30.3067	33.86	27.66	14.1633
rna-XM_027291327.1	gene-LOC104919015	LOC104919015	pituitary tumor-transforming gene 1 protein-interacting protein-like, transcript variant X2	1.91	3.63	1.31	3.65	3.55	5.3	2.92	1.69	2.18	3.53	2.07	3.62	2.28333	4.16667	2.26333	3.07333
rna-XM_027291116.1	gene-LOC104919016	LOC104919016	beta-galactosidase	24.87	26.09	22.27	21.85	24.67	18.03	22.8	22.1	23.45	23.95	21.26	25.85	24.41	21.5167	22.7833	23.6867
rna-XM_010730922.3	gene-LOC104919017	LOC104919017	low choriolytic enzyme-like, transcript variant X2	0.07	0.13	0	0	0	0.12	0	0	0.12	0.07	0	0	0.066667	0.04	0.04	0.023333
rna-XM_027290792.1	gene-LOC104919017	LOC104919017	low choriolytic enzyme-like, transcript variant X1	0	0	0	0	0	0	0	0	0	0	0	0	0	0	0	0
rna-XM_010730935.3	gene-LOC104919025	LOC104919025	SIN3-HDAC complex-associated factor, transcript variant X1	0	0	0	0	0	0	0.11	0	0	0.13	0	0	0	0	0.036667	0.043333
rna-XM_010730943.3	gene-LOC104919025	LOC104919025	SIN3-HDAC complex-associated factor, transcript variant X3	2.16	1.71	1.21	1.77	1.31	1.53	0.93	2.17	2.17	1.91	1.81	1.73	1.69333	1.53667	1.75667	1.81667
rna-XM_010730952.3	gene-LOC104919025	LOC104919025	SIN3-HDAC complex-associated factor, transcript variant X4	0.31	0.11	0.24	0.11	0.05	0.05	0.06	0.13	0.09	0	0.05	0.05	0.22	0.07	0.093333	0.033333
rna-XM_019276389.2	gene-LOC104919025	LOC104919025	SIN3-HDAC complex-associated factor, transcript variant X2	0	0	0	0	0.19	0	0	0	0	0	0	0	0	0.063333	0	0
rna-XM_019265265.2	gene-LOC104919032	LOC104919032	low-density lipoprotein receptor-related protein 8, transcript variant X1	0	0	0.38	0.2	0	0	0.54	0	0	0	0	0.19	0.126667	0.066667	0.18	0.063333
rna-XM_019265266.2	gene-LOC104919032	LOC104919032	low-density lipoprotein receptor-related protein 8, transcript variant X2	0.23	0.3	0.34	0.22	0.75	0.59	0.08	0.4	0.46	0.5	0.53	0.24	0.29	0.52	0.313333	0.423333
rna-XM_019265267.2	gene-LOC104919032	LOC104919032	low-density lipoprotein receptor-related protein 8, transcript variant X3	0	0	0	0.3	0	0	0.13	0	0.39	0.13	0	0	0	0.1	0.173333	0.043333
rna-XM_019265268.2	gene-LOC104919032	LOC104919032	low-density lipoprotein receptor-related protein 8, transcript variant X4	0.35	0.01	0.46	0.01	0.43	0.18	0.55	0.16	0.1	0.16	0.24	0.84	0.273333	0.206667	0.27	0.413333
rna-XM_027290045.1	gene-LOC104919032	LOC104919032	low-density lipoprotein receptor-related protein 8, transcript variant X5	0	0	0	0	0	0	0	0	0	0	0	0	0	0	0	0
rna-XM_010730946.3	gene-LOC104919037	LOC104919037	AP-1 complex subunit mu-1	12.37	9.75	9.87	8.97	8.71	10.53	9.82	10.73	11.84	12.41	11.57	8.29	10.6633	9.40333	10.7967	10.7567
rna-XM_019259852.2	gene-LOC104919047	LOC104919047	unconventional myosin-X, transcript variant X1	0.73	0.8	0.38	0.83	0.4	0.37	1.1	0.67	0.65	0.93	0.78	0.53	0.636667	0.533333	0.806667	0.746667
rna-XM_019259853.2	gene-LOC104919047	LOC104919047	unconventional myosin-X, transcript variant X2	2.46	1.5	1.78	2.16	2.13	3.2	2.46	2.31	2.83	2.68	1.92	2.74	1.91333	2.49667	2.53333	2.44667
rna-XM_010730963.3	gene-LOC104919049	LOC104919049	high choriolytic enzyme 2-like	0	0	0	0	0	0	0	0	0	0	0	0	0	0	0	0
rna-XM_019270592.2	gene-LOC104919051	LOC104919051	thioredoxin domain-containing protein 3 homolog, transcript variant X1	0	0	0	0	0	0	0	0	0	0	0	0	0	0	0	0
rna-XM_019270593.2	gene-LOC104919051	LOC104919051	thioredoxin domain-containing protein 3 homolog, transcript variant X2	0	0.11	0	0	0	0	0	0	0	0	0	0	0.036667	0	0	0
rna-XM_019270595.2	gene-LOC104919051	LOC104919051	thioredoxin domain-containing protein 3 homolog, transcript variant X4	0	0	0	0	0	0	0	0	0	0	0	0	0	0	0	0
rna-XM_027290978.1	gene-LOC104919051	LOC104919051	thioredoxin domain-containing protein 3 homolog, transcript variant X3	0	0	0.03	0.05	0.11	0	0.06	0.06	0.05	0.06	0.14	0.08	0.01	0.053333	0.056667	0.093333
rna-XM_019259989.2	gene-LOC104919058	LOC104919058	uncharacterized LOC104919058	0.05	0	0	0	0	0.04	0	0	0.02	0	0.02	0	0.016667	0.013333	0.006667	0.006667
rna-XM_010730978.3	gene-LOC104919062	LOC104919062	sodium-dependent phosphate transport protein 2B	0.1	0.13	0	0.24	0.11	0.04	0.73	0.02	0.06	0.23	0.37	0.69	0.076667	0.13	0.27	0.43
rna-XM_010730979.3	gene-LOC104919063	LOC104919063	chymotrypsin-like elastase family member 3B	0	0	0	0	0	0.14	0	5.71	0	0.15	0.15	4.89	0	0.046667	1.90333	1.73
rna-XM_027290284.1	gene-LOC104919067	LOC104919067	cytoplasmic polyadenylation element-binding protein 2, transcript variant X1	1.11	0.36	1.43	1.09	1.28	1.15	2.48	1.03	0.8	1.67	1.67	1.77	0.966667	1.17333	1.43667	1.70333
rna-XM_027290285.1	gene-LOC104919067	LOC104919067	cytoplasmic polyadenylation element-binding protein 2, transcript variant X2	0.53	0.56	0	0	0	0.14	0	0	0	0.15	0	0	0.363333	0.046667	0	0.05
rna-XM_027290286.1	gene-LOC104919067	LOC104919067	cytoplasmic polyadenylation element-binding protein 2, transcript variant X3	0.22	0.83	0	0.61	0.64	0.16	0	0.69	0.31	0.1	0	0	0.35	0.47	0.333333	0.033333
rna-XM_027290287.1	gene-LOC104919067	LOC104919067	cytoplasmic polyadenylation element-binding protein 2, transcript variant X4	0.21	0	0.97	0.39	0.17	0.71	0	0.85	1.04	0.17	0.34	0	0.393333	0.423333	0.63	0.17
rna-XM_027290288.1	gene-LOC104919067	LOC104919067	cytoplasmic polyadenylation element-binding protein 2, transcript variant X5	0.17	0.13	0	0	0	0	0	0	0	0	0	0	0.1	0	0	0
rna-XM_010731005.3	gene-LOC104919081	LOC104919081	tripartite motif-containing protein 66, transcript variant X1	0.61	0.18	0	1.13	0	0.34	0.54	0.62	0.35	1.28	0.39	0.17	0.263333	0.49	0.503333	0.613333
rna-XM_019276422.2	gene-LOC104919081	LOC104919081	tripartite motif-containing protein 66, transcript variant X2	6.11	5.51	11.33	12.5	3.28	6.81	4.61	4.44	2.79	1.01	2.22	1.78	7.65	7.53	3.94667	1.67
rna-XM_010731014.3	gene-LOC104919090	LOC104919090	mast/stem cell growth factor receptor Kit, transcript variant X1	0.44	0.51	0.41	0.32	0.49	0.61	0.64	0.3	0.36	0.33	0.64	0.33	0.453333	0.473333	0.433333	0.433333
rna-XM_019278214.2	gene-LOC104919090	LOC104919090	mast/stem cell growth factor receptor Kit, transcript variant X2	0	0.4	0.33	0.51	0.53	0.26	0.29	0.33	0.62	0.26	0	0.18	0.243333	0.433333	0.413333	0.146667
rna-XM_019278215.2	gene-LOC104919090	LOC104919090	mast/stem cell growth factor receptor Kit, transcript variant X3	0.22	0	0	0	0	0	0	0	0	0	0	0	0.073333	0	0	0
rna-XM_010731025.3	gene-LOC104919101	LOC104919101	GTP-binding protein REM 2	0.94	0.69	0.58	2.08	0.36	1.77	0.28	0.52	0.57	0.62	0.5	0.74	0.736667	1.40333	0.456667	0.62
rna-XR_003461858.1	gene-LOC104919103	LOC104919103	uncharacterized LOC104919103	0	0	0	0	0.05	0	0	0	0	0.05	0.09	0	0	0.016667	0	0.046667
rna-XM_019277658.2	gene-LOC104919104	LOC104919104	protein-glutamine gamma-glutamyltransferase K	0.39	0.15	0.15	0.63	0.14	0.36	0.65	0.69	1.12	0.28	0.24	0.21	0.23	0.376667	0.82	0.243333
rna-XM_019277701.2	gene-LOC104919106	LOC104919106	oxysterol-binding protein-related protein 1, transcript variant X1	0	0	0	0	0	0	0	0	0	0	0	0	0	0	0	0
rna-XM_019277702.2	gene-LOC104919106	LOC104919106	oxysterol-binding protein-related protein 1, transcript variant X2	10.69	21.93	15	21.98	9.53	12.17	10.02	7.78	12.58	8.31	5.03	21.83	15.8733	14.56	10.1267	11.7233
rna-XM_019277703.2	gene-LOC104919106	LOC104919106	oxysterol-binding protein-related protein 1, transcript variant X3	0.44	0.12	0.23	0.46	0.11	0.46	0.26	0	0	0.3	0.78	0.53	0.263333	0.343333	0.086667	0.536667
rna-XM_019277704.2	gene-LOC104919106	LOC104919106	oxysterol-binding protein-related protein 1, transcript variant X4	4.88	5.99	8.3	7.12	5.42	3.28	4.27	4.71	5.6	2.77	4.77	10.39	6.39	5.27333	4.86	5.97667
rna-XM_010731034.3	gene-LOC104919108	LOC104919108	vacuolar protein sorting-associated protein 4B	21.59	20.75	19.84	18.99	18.45	17.55	21.33	18.65	18.48	22.8	22.15	20.18	20.7267	18.33	19.4867	21.71
rna-XM_010731036.3	gene-LOC104919109	LOC104919109	pleckstrin homology domain-containing family B member 2, transcript variant X1	19.46	18.06	17.42	20.07	15.2	21.14	14.6	18.83	17.54	16.44	19.08	19.21	18.3133	18.8033	16.99	18.2433
rna-XM_010731037.3	gene-LOC104919109	LOC104919109	pleckstrin homology domain-containing family B member 2, transcript variant X2	0.62	0.94	0.6	0	0.45	0.25	0.57	0.35	0.34	0.13	0	0.62	0.72	0.233333	0.42	0.25
rna-XM_019277682.2	gene-LOC104919109	LOC104919109	pleckstrin homology domain-containing family B member 2, transcript variant X4	0.21	0.31	0.75	0.61	0.51	0	0.21	0	0	0.42	0	0	0.423333	0.373333	0.07	0.14
rna-XM_027290647.1	gene-LOC104919109	LOC104919109	pleckstrin homology domain-containing family B member 2, transcript variant X3	0	0	0	0.14	0	0	0	0	0	0	0.22	0	0	0.046667	0	0.073333
rna-XM_027290648.1	gene-LOC104919109	LOC104919109	pleckstrin homology domain-containing family B member 2, transcript variant X5	0.3	0.14	0	0.22	0.17	0.27	0	0.12	0.68	0	0.75	0.09	0.146667	0.22	0.266667	0.28
rna-XM_027290425.1	gene-LOC104919114	LOC104919114	serine/threonine-protein kinase PAK 2	6	4.65	4.89	5.16	8.74	4.66	1.61	7.61	13.65	5.09	16.38	2.3	5.18	6.18667	7.62333	7.92333
rna-XM_010731045.3	gene-LOC104919115	LOC104919115	ribonuclease P protein subunit p21	5.12	4.39	5.79	3.17	4.47	5.73	3.63	5.18	5.09	4.17	4.61	3.52	5.1	4.45667	4.63333	4.1
rna-XM_010731046.3	gene-LOC104919116	LOC104919116	aquaporin-12	0	0	0	0	0	0	0	0.32	0	0	0	0.21	0	0	0.106667	0.07
rna-XM_010731047.3	gene-LOC104919117	LOC104919117	UDP-N-acetylglucosamine/UDP-glucose/GDP-mannose transporter	12.77	9.73	10.86	8.25	9.65	11.1	8.69	8.36	12.5	8.62	12.88	7.26	11.12	9.66667	9.85	9.58667
rna-XM_010731049.3	gene-LOC104919118	LOC104919118	transmembrane protein 205-like, transcript variant X1	2.42	1.83	1.99	2.09	1.92	2.74	2.43	2.01	2.5	2.31	2.52	1.44	2.08	2.25	2.31333	2.09
rna-XM_027290340.1	gene-LOC104919118	LOC104919118	transmembrane protein 205-like, transcript variant X2	0	0.09	0.28	0	0.06	0	0.08	0	0	0.17	0.23	0.19	0.123333	0.02	0.026667	0.196667
rna-XM_027290219.1	gene-LOC104919126	LOC104919126	FYN-binding protein 1-like, transcript variant X1	0	0.13	0	0.1	0.03	0.01	0	0.08	0.19	0.06	0.01	0	0.043333	0.046667	0.09	0.023333
rna-XM_027290220.1	gene-LOC104919126	LOC104919126	FYN-binding protein 1-like, transcript variant X2	0.07	0	0.07	0	0	0.07	0.03	0	0	0	0.03	0.07	0.046667	0.023333	0.01	0.033333
rna-XM_027290350.1	gene-LOC104919131	LOC104919131	transmembrane emp24 domain-containing protein 5	0	0	0	0	0	0	0	0	0	0	0	0	0	0	0	0
rna-XM_019278227.2	gene-LOC104919139	LOC104919139	cadherin-24, transcript variant X1	0	0	0	0	0	0	0.02	0	0	0	0	0.01	0	0	0.006667	0.003333
rna-XM_027290433.1	gene-LOC104919139	LOC104919139	cadherin-24, transcript variant X2	0	0	0	0	0	0	0	0	0	0	0.02	0	0	0	0	0.006667
rna-XM_010731073.3	gene-LOC104919140	LOC104919140	calcitonin-1	0	0	0	0	0	0	0	0	0	0.05	0	0	0	0	0	0.016667
rna-XM_027290233.1	gene-LOC104919141	LOC104919141	proteasome subunit beta type-11	0	0	0	0	0	0	0	0	0	0	0	0	0	0	0	0
rna-XM_010731079.3	gene-LOC104919149	LOC104919149	uncharacterized LOC104919149	4.22	2.8	2.7	2.66	3.2	2.31	2.75	2.56	2.51	2.58	2.57	2.92	3.24	2.72333	2.60667	2.69
rna-XM_019277667.2	gene-LOC104919152	LOC104919152	transcription factor MafB	0	0.04	0	0	0	0	0	0	0	0	0.04	0	0.013333	0	0	0.013333
rna-XM_019277650.2	gene-LOC104919153	LOC104919153	capping protein, Arp2/3 and myosin-I linker protein 3, transcript variant X1	0	0.09	0	0	0.01	0	0	0.14	0	0.02	0.03	0	0.03	0.003333	0.046667	0.016667
rna-XM_019277651.2	gene-LOC104919153	LOC104919153	capping protein, Arp2/3 and myosin-I linker protein 3, transcript variant X2	0.21	0	0	0	0	0.01	0	0	0	0	0	0	0.07	0.003333	0	0
rna-XM_019277663.2	gene-LOC104919156	LOC104919156	histamine H3 receptor	1.91	1.18	0.89	2.15	3.46	5.12	3.34	2.63	2.98	2.81	2.1	1.53	1.32667	3.57667	2.98333	2.14667
rna-XM_010731089.3	gene-LOC104919158	LOC104919158	cathepsin L1	0	0	0	0	0	0	0	0	0	0	0	0	0	0	0	0
rna-XM_027289845.1	gene-LOC104919160	LOC104919160	proprotein convertase subtilisin/kexin type 9	0.3	0.12	0.2	0.39	0.2	0.12	0.4	0.08	0.49	0.15	0.44	0.14	0.206667	0.236667	0.323333	0.243333
rna-XM_010731095.3	gene-LOC104919161	LOC104919161	nucleobindin-2, transcript variant X1	17.31	20.36	20.45	17.94	17.8	15.57	20.18	17.57	19.69	18.08	19.11	18.69	19.3733	17.1033	19.1467	18.6267
rna-XM_027281728.1	gene-LOC104919161	LOC104919161	nucleobindin-2, transcript variant X2	0	0	0	0	0	0	0.29	0	0	0	0	0	0	0	0.096667	0
rna-XM_019274807.2	gene-LOC104919168	LOC104919168	tubulin-specific chaperone cofactor E-like protein, transcript variant X3	4.41	2.92	4.55	3.49	2.75	3.44	2.59	2.63	3.46	2.76	2.45	4.61	3.96	3.22667	2.89333	3.27333
rna-XM_019274810.2	gene-LOC104919168	LOC104919168	tubulin-specific chaperone cofactor E-like protein, transcript variant X4	1.35	0.59	0.33	1.26	0.44	0.36	1.39	0.12	0.62	1.29	0.28	0.29	0.756667	0.686667	0.71	0.62
rna-XM_027277878.1	gene-LOC104919168	LOC104919168	tubulin-specific chaperone cofactor E-like protein, transcript variant X1	0	0	0	0.09	0.18	0	0	0	0	0	0	0	0	0.09	0	0
rna-XM_027277879.1	gene-LOC104919168	LOC104919168	tubulin-specific chaperone cofactor E-like protein, transcript variant X2	0.26	0	0	0	0	0	0	0	0	0.32	0.34	0	0.086667	0	0	0.22
rna-XM_027277880.1	gene-LOC104919168	LOC104919168	tubulin-specific chaperone cofactor E-like protein, transcript variant X5	0	0.23	0	0.18	0	0	0.1	0	0	0.01	0.03	0.14	0.076667	0.06	0.033333	0.06
rna-XM_010731100.3	gene-LOC104919169	LOC104919169	ubiquitin carboxyl-terminal hydrolase 2	0.37	0.72	0.14	0.62	0.33	0.16	0.22	0.21	0.13	0.28	0.06	0.2	0.41	0.37	0.186667	0.18
rna-XM_019274795.2	gene-LOC104919170	LOC104919170	A-agglutinin anchorage subunit-like, transcript variant X1	0	0	0	0	0	0	0	0	0	0	0	0	0	0	0	0
rna-XM_019274796.2	gene-LOC104919170	LOC104919170	A-agglutinin anchorage subunit-like, transcript variant X2	0	0	0	0	0	0	0	0	0	0	0	0	0	0	0	0
rna-XM_027278067.1	gene-LOC104919170	LOC104919170	A-agglutinin anchorage subunit-like, transcript variant X3	0	0	0.12	0	0	0	0	0	0	0	0	0	0.04	0	0	0
rna-XM_010731106.3	gene-LOC104919171	LOC104919171	caprin-1, transcript variant X1	0	0	0	0	0	0	0	0	0	0	0	0	0	0	0	0
rna-XM_010731115.3	gene-LOC104919171	LOC104919171	caprin-1, transcript variant X2	20.23	16.39	19.32	17.57	20.34	17.79	18.58	20.32	17.92	17.72	21.2	21.4	18.6467	18.5667	18.94	20.1067
rna-XM_027281727.1	gene-LOC104919171	LOC104919171	caprin-1, transcript variant X3	0	0	0	0	0	0	0	0	0	0	0	0	0	0	0	0
rna-XM_010731103.3	gene-LOC104919172	LOC104919172	protein FAM57A	1.71	1.27	1.31	1.15	1.5	1.83	1.24	1.51	1.54	1.68	1.47	1.51	1.43	1.49333	1.43	1.55333
rna-XM_010731104.3	gene-LOC104919173	LOC104919173	smoothelin-like protein 2	0.02	0	0.02	0.02	0.02	0.04	0.08	0.04	0.02	0.02	0	0	0.013333	0.026667	0.046667	0.006667
rna-XM_010731105.3	gene-LOC104919174	LOC104919174	adapter molecule crk	3.67	2.94	3.03	4.12	4.7	4.56	3.4	3.3	3.16	3.97	4.42	3.6	3.21333	4.46	3.28667	3.99667
rna-XM_010731107.3	gene-LOC104919175	LOC104919175	14-3-3 protein epsilon, transcript variant X1	47.45	42.03	45.71	49.43	52.16	43.42	41.17	41.72	45.16	47.41	46.55	47.42	45.0633	48.3367	42.6833	47.1267
rna-XM_010731108.3	gene-LOC104919175	LOC104919175	14-3-3 protein epsilon, transcript variant X2	0	0	0.43	0.14	0.53	0	0	0.3	0.13	0.26	0.51	0.25	0.143333	0.223333	0.143333	0.34
rna-XM_019274801.2	gene-LOC104919176	LOC104919176	glutamate receptor 4, transcript variant X2	0	0	0	0	0	0	0.03	0	0	0	0	0	0	0	0.01	0
rna-XM_019274802.2	gene-LOC104919176	LOC104919176	glutamate receptor 4, transcript variant X3	0	0	0	0	0	0	0	0	0	0	0	0	0	0	0	0
rna-XM_019274803.2	gene-LOC104919176	LOC104919176	glutamate receptor 4, transcript variant X4	0	0	0	0	0	0	0	0	0	0	0	0	0	0	0	0
rna-XR_002042899.2	gene-LOC104919176	LOC104919176	glutamate receptor 4, transcript variant X1	0	0	0	0.02	0	0.02	0	0	0	0.02	0.02	0.03	0	0.013333	0	0.023333
rna-XM_010731112.3	gene-LOC104919177	LOC104919177	uncharacterized LOC104919177	0	0	0	0	0	0	0	0	0	0	0	0	0	0	0	0
rna-XM_010731116.3	gene-LOC104919179	LOC104919179	solute carrier family 35 member F2	4.14	2.08	2.52	1.53	3.06	2.48	2.16	2.19	2.04	1.85	1.67	2.27	2.91333	2.35667	2.13	1.93
rna-XM_019274773.2	gene-LOC104919180	LOC104919180	cullin-5, transcript variant X1	6.89	5.61	5.79	5.02	6.38	5.83	5.97	5.89	5.16	6	5.51	5.26	6.09667	5.74333	5.67333	5.59
rna-XM_019274774.2	gene-LOC104919180	LOC104919180	cullin-5, transcript variant X2	2.01	2.21	2.61	2.99	3.19	1.8	2.77	2.93	3.39	2.25	3.18	2.53	2.27667	2.66	3.03	2.65333
rna-XM_027278190.1	gene-LOC104919180	LOC104919180	cullin-5, transcript variant X3	0	0	0	0.13	0	0	0	0	0	0	0	0	0	0.043333	0	0
rna-XM_010731120.3	gene-LOC104919181	LOC104919181	olfactory marker protein	0	0	0	0	0	0	0	0	0	0	0	0	0	0	0	0
rna-XM_010731121.3	gene-LOC104919182	LOC104919182	calpain-5, transcript variant X2	0.03	0.02	0.04	0.02	0.01	0	0.05	0.07	0	0	0.03	0.04	0.03	0.01	0.04	0.023333
rna-XM_019274772.2	gene-LOC104919182	LOC104919182	calpain-5, transcript variant X1	0	0	0	0	0	0.04	0	0	0.05	0.06	0	0	0	0.013333	0.016667	0.02
rna-XM_010731122.3	gene-LOC104919183	LOC104919183	glycerophosphodiester phosphodiesterase domain-containing protein 5, transcript variant X1	6.22	5.44	5.28	7.16	9.15	5.72	6.64	6.58	5.69	5.01	8.42	7.95	5.64667	7.34333	6.30333	7.12667
rna-XM_019274779.2	gene-LOC104919183	LOC104919183	glycerophosphodiester phosphodiesterase domain-containing protein 5, transcript variant X2	0.47	0.19	1.53	0.42	0.47	0.88	1.55	1.2	0.94	0.5	0	1.03	0.73	0.59	1.23	0.51
rna-XM_019274780.2	gene-LOC104919183	LOC104919183	glycerophosphodiester phosphodiesterase domain-containing protein 5, transcript variant X3	0.55	2.03	0.37	0.75	1.47	1.22	0.45	0	0.92	1.26	1.11	0.45	0.983333	1.14667	0.456667	0.94
rna-XM_027278482.1	gene-LOC104919183	LOC104919183	glycerophosphodiester phosphodiesterase domain-containing protein 5, transcript variant X4	0	0	0	0.15	0.55	0.35	0	0	0.17	0	0	0	0	0.35	0.056667	0
rna-XM_010731124.3	gene-LOC104919184	LOC104919184	aquaporin-11	4.34	5.52	9.13	8.22	16.25	4.72	4.89	6.1	2.62	3.83	10.56	15.63	6.33	9.73	4.53667	10.0067
rna-XM_010731125.3	gene-LOC104919185	LOC104919185	F-BAR and double SH3 domains protein 2	1.52	1.44	1.33	1.56	2	2.39	1.5	1.72	1.71	1.87	1.52	1.44	1.43	1.98333	1.64333	1.61
rna-XM_010731127.3	gene-LOC104919187	LOC104919187	vacuolar protein sorting-associated protein 37D, transcript variant X1	2.05	2.3	2.72	2.96	3.35	1.76	2.68	3.44	2.16	3.05	2.89	3.05	2.35667	2.69	2.76	2.99667
rna-XM_027278083.1	gene-LOC104919187	LOC104919187	vacuolar protein sorting-associated protein 37D, transcript variant X2	1.07	1.09	1.14	1.32	1.21	1.31	1.06	1.44	1.03	1.19	1.24	0.72	1.1	1.28	1.17667	1.05
rna-XM_010731128.3	gene-LOC104919188	LOC104919188	uncharacterized LOC104919188	46.88	51.55	46.68	32.62	26.89	31.5	43.36	49.25	50.75	37.42	39.72	38.9	48.37	30.3367	47.7867	38.68
rna-XM_010731131.3	gene-LOC104919190	LOC104919190	myelin protein zero-like protein 1, transcript variant X1	0	0	0	0	0	0	0	0	0	0	0	0	0	0	0	0
rna-XR_797018.3	gene-LOC104919190	LOC104919190	myelin protein zero-like protein 1, transcript variant X2	0	0	0	0	0	0	0	0	0	0	0	0	0	0	0	0
rna-XM_010731135.3	gene-LOC104919191	LOC104919191	homeobox protein aristaless-like 4	0.41	0.47	0.55	0.48	0.66	0.77	0.4	0.57	0.28	0.7	0.5	0.7	0.476667	0.636667	0.416667	0.633333
rna-XM_010731132.3	gene-LOC104919192	LOC104919192	myelin protein zero-like protein 1, transcript variant X1	1.8	2.43	1.71	1.53	1.73	1.48	2.09	1.92	3.9	2.12	2.87	0.89	1.98	1.58	2.63667	1.96
rna-XM_010731134.3	gene-LOC104919192	LOC104919192	myelin protein zero-like protein 1, transcript variant X2	18.06	15.22	15.56	13.78	16.47	17.75	16.1	15.44	15.28	15.9	16.02	15.14	16.28	16	15.6067	15.6867
rna-XM_027273812.1	gene-LOC104919195	LOC104919195	hepatocyte cell adhesion molecule-like	0	0	0	0.25	0	0	0	0.14	0.12	0	0	0	0	0.083333	0.086667	0
rna-XM_019274787.2	gene-LOC104919197	LOC104919197	unconventional myosin-VIIa	0.03	0.02	0	0.1	0.04	0	0.01	0	0.02	0.01	0.06	0.01	0.016667	0.046667	0.01	0.026667
rna-XM_010731143.3	gene-LOC104919198	LOC104919198	remodeling and spacing factor 1	0.84	0.68	0.79	0.51	0.4	1.16	1.03	1.2	0.84	0.97	1.11	0.63	0.77	0.69	1.02333	0.903333
rna-XM_010731144.3	gene-LOC104919200	LOC104919200	ATP-sensitive inward rectifier potassium channel 1	0.03	0.08	0.85	0.12	0.74	0.02	0.02	0.34	0.02	0.08	0.33	0.59	0.32	0.293333	0.126667	0.333333
rna-XM_010731148.3	gene-LOC104919203	LOC104919203	voltage-gated potassium channel subunit beta-1, transcript variant X3	0	0	0	0	0.03	0.08	0	0	0	0.02	0	0	0	0.036667	0	0.006667
rna-XM_019262280.1	gene-LOC104919203	LOC104919203	voltage-gated potassium channel subunit beta-1, transcript variant X1	0.03	0	0.02	0	0	0	0.05	0	0.05	0	0	0	0.016667	0	0.033333	0
rna-XM_019262281.2	gene-LOC104919203	LOC104919203	voltage-gated potassium channel subunit beta-1, transcript variant X2	0	0	0	0	0	0	0	0	0	0	0	0	0	0	0	0
rna-XM_010731149.3	gene-LOC104919204	LOC104919204	ras-related protein Rap-2b	15.53	14.28	14.62	17.32	25.06	18.58	18.61	18.92	14.53	19.64	20.63	18.22	14.81	20.32	17.3533	19.4967
rna-XM_010731150.3	gene-LOC104919205	LOC104919205	muscleblind-like protein 1, transcript variant X1	0	0	0	0	0	0.44	0	0	0	0	0	0.43	0	0.146667	0	0.143333
rna-XM_010731151.3	gene-LOC104919205	LOC104919205	muscleblind-like protein 1, transcript variant X4	13.12	9.86	11.15	11.07	10.52	9.52	12.69	12.06	13.32	12.41	10.95	11.38	11.3767	10.37	12.69	11.58
rna-XM_010731152.3	gene-LOC104919205	LOC104919205	muscleblind-like protein 1, transcript variant X2	10.42	8.05	8.61	10.59	8.68	9.33	10.48	10.52	11.47	10.73	10.39	8.62	9.02667	9.53333	10.8233	9.91333
rna-XM_010731153.3	gene-LOC104919205	LOC104919205	muscleblind-like protein 1, transcript variant X3	8.72	7.67	6.12	8.75	9.05	7.66	7.97	9.35	8.38	6.8	6.77	6.67	7.50333	8.48667	8.56667	6.74667
rna-XM_019262146.2	gene-LOC104919205	LOC104919205	muscleblind-like protein 1, transcript variant X5	8.4	7.23	7.97	7.15	7.98	6.76	9.47	8.62	9.33	8.42	8.84	7.82	7.86667	7.29667	9.14	8.36
rna-XM_019262147.2	gene-LOC104919205	LOC104919205	muscleblind-like protein 1, transcript variant X6	9.59	5.75	8	7.34	7.97	9.32	8.8	8.32	10.03	9.19	8.62	5.79	7.78	8.21	9.05	7.86667
rna-XM_019262148.2	gene-LOC104919205	LOC104919205	muscleblind-like protein 1, transcript variant X7	10.79	8.06	8.9	10.76	9.42	11.25	9.11	11.63	11.94	10.18	9.43	9.74	9.25	10.4767	10.8933	9.78333
rna-XM_027285089.1	gene-LOC104919205	LOC104919205	muscleblind-like protein 1, transcript variant X8	2.96	2.93	3.02	3.77	1.8	3.05	3.28	3.56	4.08	2.96	3.74	4.52	2.97	2.87333	3.64	3.74
rna-XM_027285090.1	gene-LOC104919205	LOC104919205	muscleblind-like protein 1, transcript variant X9	0	0	0.62	0	0	0	0.46	0	0	0	0	0	0.206667	0	0.153333	0
rna-XM_027285091.1	gene-LOC104919205	LOC104919205	muscleblind-like protein 1, transcript variant X10	3.61	2.76	1.08	2.09	1.28	2.57	0.52	3.39	2.33	3.93	2.21	1.58	2.48333	1.98	2.08	2.57333
rna-XM_027285092.1	gene-LOC104919205	LOC104919205	muscleblind-like protein 1, transcript variant X11	0	0	0	0	0	0	0	0	0	0	0	0	0	0	0	0
rna-XM_027285093.1	gene-LOC104919205	LOC104919205	muscleblind-like protein 1, transcript variant X12	4.88	5.51	4.54	4.96	3.86	4.43	3.98	4.34	7.24	5.06	4.53	3.51	4.97667	4.41667	5.18667	4.36667
rna-XM_027285094.1	gene-LOC104919205	LOC104919205	muscleblind-like protein 1, transcript variant X13	4.89	4.82	4.65	3.62	5.02	4.77	3.93	5.26	5.14	4.79	3.45	4.04	4.78667	4.47	4.77667	4.09333
rna-XM_027285095.1	gene-LOC104919205	LOC104919205	muscleblind-like protein 1, transcript variant X14	2.65	2.36	3.42	3.79	2.57	3.48	0.96	2.33	6.17	2.96	3.11	2.14	2.81	3.28	3.15333	2.73667
rna-XM_027285096.1	gene-LOC104919205	LOC104919205	muscleblind-like protein 1, transcript variant X15	0	0	0	0	0	0	0	0	0	0	0	0	0	0	0	0
rna-XM_027285097.1	gene-LOC104919205	LOC104919205	muscleblind-like protein 1, transcript variant X16	3.81	2.91	3.6	3.09	4.49	4.84	3.83	3.05	3.71	3.72	3.86	3.42	3.44	4.14	3.53	3.66667
rna-XM_027285099.1	gene-LOC104919205	LOC104919205	muscleblind-like protein 1, transcript variant X17	2.78	3.28	0.76	2.3	1.6	2.18	1.76	2.58	0.8	0.85	2.05	1.39	2.27333	2.02667	1.71333	1.43
rna-XM_027285100.1	gene-LOC104919205	LOC104919205	muscleblind-like protein 1, transcript variant X18	9.09	7.37	7.99	7.17	6.99	6.76	9.36	8.9	9.27	9.05	7.86	8.97	8.15	6.97333	9.17667	8.62667
rna-XM_027285101.1	gene-LOC104919205	LOC104919205	muscleblind-like protein 1, transcript variant X19	4.06	2.21	3.27	4.29	3.09	2.81	1.78	2.66	2.67	3.62	1.88	2.91	3.18	3.39667	2.37	2.80333
rna-XM_027285102.1	gene-LOC104919205	LOC104919205	muscleblind-like protein 1, transcript variant X20	1.84	0.84	1.08	1.63	1.41	1.54	2.93	1.09	1.52	0.48	2.46	2.46	1.25333	1.52667	1.84667	1.8
rna-XM_027285103.1	gene-LOC104919205	LOC104919205	muscleblind-like protein 1, transcript variant X21	8.28	6.69	5.72	7.93	6.16	6.67	6.68	6.89	9.7	7.52	7.72	7.26	6.89667	6.92	7.75667	7.5
rna-XM_027285104.1	gene-LOC104919205	LOC104919205	muscleblind-like protein 1, transcript variant X22	3.12	1.7	1.54	1.97	2.43	1.53	1.48	2.35	2.15	2.9	3.5	1.69	2.12	1.97667	1.99333	2.69667
rna-XM_027285105.1	gene-LOC104919205	LOC104919205	muscleblind-like protein 1, transcript variant X23	8.11	5.31	6.8	7.19	5.15	5.47	6.74	3.77	7.91	6.78	5.28	6.88	6.74	5.93667	6.14	6.31333
rna-XM_027285106.1	gene-LOC104919205	LOC104919205	muscleblind-like protein 1, transcript variant X24	5.33	3.92	6.66	6.25	4.61	7.15	5.1	6.5	5.77	6.3	5.85	5.62	5.30333	6.00333	5.79	5.92333
rna-XM_027285107.1	gene-LOC104919205	LOC104919205	muscleblind-like protein 1, transcript variant X25	1.15	0	0.04	0.15	0.67	0.63	0	0.56	0.7	0.58	1.25	0	0.396667	0.483333	0.42	0.61
rna-XM_027285108.1	gene-LOC104919205	LOC104919205	muscleblind-like protein 1, transcript variant X26	4.5	4.02	2	2.35	1.92	4.85	3.09	1.98	4.7	1.84	3.12	2.26	3.50667	3.04	3.25667	2.40667
rna-XM_010731163.3	gene-LOC104919207	LOC104919207	cullin-3	24.69	21.84	23.49	21.43	23.45	22.15	21.01	21.92	21.53	22.37	22.39	23.69	23.34	22.3433	21.4867	22.8167
rna-XM_010731164.3	gene-LOC104919208	LOC104919208	AP-1 complex subunit sigma-3, transcript variant X1	0	0	0	0	0	0	0	0	0	0	0	0	0	0	0	0
rna-XM_010731165.3	gene-LOC104919208	LOC104919208	AP-1 complex subunit sigma-3, transcript variant X2	1.37	0.78	1.28	0.9	0.92	1.28	0.41	0.6	0.78	0.53	0.96	0.95	1.14333	1.03333	0.596667	0.813333
rna-XM_010731167.3	gene-LOC104919209	LOC104919209	secretogranin-2	0	0.02	0	0	0	0	0	0	0	0.02	0.02	0	0.006667	0	0	0.013333
rna-XM_019262288.2	gene-LOC104919210	LOC104919210	long-chain-fatty-acid--CoA ligase 3, transcript variant X1	4.43	3.52	3.99	3.52	4.14	3.79	2.97	3.55	3.31	2.73	4.44	4.51	3.98	3.81667	3.27667	3.89333
rna-XM_027285458.1	gene-LOC104919210	LOC104919210	long-chain-fatty-acid--CoA ligase 3, transcript variant X2	0.33	0.25	0	0	0	0.76	0.14	0.31	0.48	0.33	0.25	0.14	0.193333	0.253333	0.31	0.24
rna-XM_027285459.1	gene-LOC104919210	LOC104919210	long-chain-fatty-acid--CoA ligase 3, transcript variant X3	0	0	0	0	0	0	0	0	0	0.34	0	0	0	0	0	0.113333
rna-XM_027285460.1	gene-LOC104919210	LOC104919210	long-chain-fatty-acid--CoA ligase 3, transcript variant X4	0	0	0	0.28	0.6	0	0.24	0.21	0.19	0.25	0	0.18	0	0.293333	0.213333	0.143333
rna-XM_010731169.3	gene-LOC104919211	LOC104919211	paired box protein Pax-3, transcript variant X1	0	0	0.04	0	0.08	0	0.05	0	0.03	0	0	0	0.013333	0.026667	0.026667	0
rna-XM_010731170.3	gene-LOC104919211	LOC104919211	paired box protein Pax-3, transcript variant X2	0	0	0	0	0.01	0	0.01	0.02	0.01	0	0	0	0	0.003333	0.013333	0
rna-XM_019262088.2	gene-LOC104919213	LOC104919213	IgGFc-binding protein, transcript variant X1	0	0	0	0	0	0	0	0	0	0	0	0	0	0	0	0
rna-XM_019262090.2	gene-LOC104919213	LOC104919213	IgGFc-binding protein, transcript variant X2	0	0	0	0	0.03	0	0	0	0	0	0	0	0	0.01	0	0
rna-XM_019262195.2	gene-LOC104919214	LOC104919214	ephrin type-B receptor 1-B, transcript variant X1	0.22	0.52	0.36	0.51	0.38	0.19	0.47	0.42	0.39	0	0.41	0.44	0.366667	0.36	0.426667	0.283333
rna-XM_027285682.1	gene-LOC104919214	LOC104919214	ephrin type-B receptor 1-B, transcript variant X2	0.28	0	0.25	0.24	0.24	0.5	0.22	0.47	0.34	0.61	0	0	0.176667	0.326667	0.343333	0.203333
rna-XM_010731175.3	gene-LOC104919215	LOC104919215	glypican-5, transcript variant X2	0	0	0	0	0	0	0	0	0	0	0	0	0	0	0	0
rna-XM_019262305.2	gene-LOC104919215	LOC104919215	glypican-5, transcript variant X1	0	0	0	0	0	0.12	0	0	0	0	0	0	0	0.04	0	0
rna-XM_027285683.1	gene-LOC104919215	LOC104919215	glypican-5, transcript variant X3	0.03	0.06	0.02	0.04	0	0	0.02	0	0.01	0.03	0.02	0	0.036667	0.013333	0.01	0.016667
rna-XM_019262124.2	gene-LOC104919218	LOC104919218	fibroblast growth factor 12, transcript variant X2	0.28	0.31	0.21	0	0	0.36	0.19	0.07	0.11	0	0.43	0.52	0.266667	0.12	0.123333	0.316667
rna-XM_019262126.2	gene-LOC104919218	LOC104919218	fibroblast growth factor 12, transcript variant X3	1.11	0.68	0.23	0.49	0.07	0.6	0.57	0.31	0	0.93	1.78	2.57	0.673333	0.386667	0.293333	1.76
rna-XM_027285698.1	gene-LOC104919218	LOC104919218	fibroblast growth factor 12, transcript variant X1	0	0	0	0	0	0	0	0	0	0.17	0.05	0	0	0	0	0.073333
rna-XM_019262166.2	gene-LOC104919221	LOC104919221	dehydrogenase/reductase SDR family member 12	0	0	0.04	0.08	0	0	0.08	0	0.04	0.04	0	0.07	0.013333	0.026667	0.04	0.036667
rna-XM_027284891.1	gene-LOC104919223	LOC104919223	RING finger protein 224	0	0	0	0	0.01	0	0.01	0	0.05	0	0	0.03	0	0.003333	0.02	0.01
rna-XM_019262196.2	gene-LOC104919225	LOC104919225	glypican-1	1.35	1.16	1.51	4.91	3.03	2.72	3.72	4.96	3	1.65	0.9	2.92	1.34	3.55333	3.89333	1.82333
rna-XM_010731184.3	gene-LOC104919226	LOC104919226	zinc finger CCCH domain-containing protein 13, transcript variant X2	0	0	0	0	0	0	0	0	0	0	0	0	0	0	0	0
rna-XM_019262118.2	gene-LOC104919226	LOC104919226	zinc finger CCCH domain-containing protein 13, transcript variant X1	0	0	0	0	0	0	0	0	0	0	0	0	0	0	0	0
rna-XM_027285678.1	gene-LOC104919227	LOC104919227	collagen alpha-4(IV) chain	0	0	0	0	0	0	0	0	0	0	0	0	0	0	0	0
rna-XM_019262130.2	gene-LOC104919232	LOC104919232	collagen alpha-5(IV) chain, transcript variant X1	0	0	0	0	0	0	0	0	0	0	0	0	0	0	0	0
rna-XM_027285679.1	gene-LOC104919232	LOC104919232	collagen alpha-5(IV) chain, transcript variant X2	0	0	0	0	0	0.01	0	0	0	0	0.01	0	0	0.003333	0	0.003333
rna-NM_001303378.1	gene-LOC104919244	LOC104919244	ferritin, heavy subunit	2232.88	2100.67	2034.7	2608.7	2563.9	2170.14	2065.5	1725.16	1898.84	2509.91	2362.93	2908.63	2122.75	2447.58	1896.5	2593.82
rna-XM_010731225.3	gene-LOC104919254	LOC104919254	transmembrane protein 178B	0.31	0.44	0.36	0.39	0.41	0.7	0.45	0.33	0.35	0.46	0.25	0.43	0.37	0.5	0.376667	0.38
rna-XM_010731226.3	gene-LOC104919255	LOC104919255	growth arrest-specific protein 2	0	0	0	0	0	0	0	0	0	0	0	0	0	0	0	0
rna-XM_010731227.3	gene-LOC104919256	LOC104919256	vesicular glutamate transporter 2.1	0	0	0	0	0	0	0	0	0	0	0	0.04	0	0	0	0.013333
rna-XM_010731231.3	gene-LOC104919257	LOC104919257	tight junction protein ZO-1, transcript variant X1	0	0	0	0	0	0	0.09	0	0	0	0	0	0	0	0.03	0
rna-XM_010731239.3	gene-LOC104919257	LOC104919257	tight junction protein ZO-1, transcript variant X2	0	0	0	0	0	0.24	0	0	0.03	0	0	0	0	0.08	0.01	0
rna-XM_010731247.3	gene-LOC104919257	LOC104919257	tight junction protein ZO-1, transcript variant X3	0	0	0	0	0	0	0	0	0	0	0	0	0	0	0	0
rna-XM_010731255.3	gene-LOC104919257	LOC104919257	tight junction protein ZO-1, transcript variant X5	0.27	0.31	0	0.5	0	0.83	0.32	0.18	0.26	0.41	0.73	0.25	0.193333	0.443333	0.253333	0.463333
rna-XM_010731263.3	gene-LOC104919257	LOC104919257	tight junction protein ZO-1, transcript variant X6	0	0.2	0	0	0.32	0.11	0.3	0.19	0.35	0	0	0.14	0.066667	0.143333	0.28	0.046667
rna-XM_010731271.3	gene-LOC104919257	LOC104919257	tight junction protein ZO-1, transcript variant X9	0	0.67	0.61	0.5	1.23	0.72	0.35	0.85	0.57	0.67	0.12	0.01	0.426667	0.816667	0.59	0.266667
rna-XM_010731288.3	gene-LOC104919257	LOC104919257	tight junction protein ZO-1, transcript variant X8	0	0	0	0	0	0	0	0	0	0	0	0	0	0	0	0
rna-XM_019260743.2	gene-LOC104919257	LOC104919257	tight junction protein ZO-1, transcript variant X4	0	0	0	0	0	0.54	0	0	0	0	0	0	0	0.18	0	0
rna-XM_019260744.2	gene-LOC104919257	LOC104919257	tight junction protein ZO-1, transcript variant X11	0	0.44	0.45	0	0	0.18	0.23	0	0	0.14	0	0.34	0.296667	0.06	0.076667	0.16
rna-XM_027280997.1	gene-LOC104919257	LOC104919257	tight junction protein ZO-1, transcript variant X7	0.65	0.09	0.29	0.39	0.95	0.32	0.27	0.53	0.42	0.86	0.83	0.63	0.343333	0.553333	0.406667	0.773333
rna-XM_027280998.1	gene-LOC104919257	LOC104919257	tight junction protein ZO-1, transcript variant X10	0.82	0	0	0.25	0	0	0.44	0.62	0.13	0.14	0.05	0	0.273333	0.083333	0.396667	0.063333
rna-XM_010731228.3	gene-LOC104919258	LOC104919258	anoctamin-5, transcript variant X2	18.03	23.64	15.78	21.21	19.65	30.82	22.5	22.05	22.28	27.53	19.42	24.48	19.15	23.8933	22.2767	23.81
rna-XM_019260757.2	gene-LOC104919258	LOC104919258	anoctamin-5, transcript variant X1	0	0.24	0.1	0	0	0.1	0.22	0	0	0	0	0	0.113333	0.033333	0.073333	0
rna-XM_010731229.3	gene-LOC104919259	LOC104919259	sulfotransferase family cytosolic 2B member 1	0.24	0	0.08	0.5	0.15	0.14	0.15	0.08	0.28	0	0.08	0	0.106667	0.263333	0.17	0.026667
rna-XM_027276558.1	gene-LOC104919260	LOC104919260	beta-2 adrenergic receptor	0	0	0	0.02	0	0	0	0	0	0	0	0	0	0.006667	0	0
rna-XM_019260727.2	gene-LOC104919262	LOC104919262	60S acidic ribosomal protein P2	3570.08	2876.15	2877.48	2551.46	2850.92	2888.55	3255.49	3571.14	3236.92	3351.09	3051.81	2818.39	3107.9	2763.64	3354.52	3073.76
rna-XM_010731235.3	gene-LOC104919264	LOC104919264	solute carrier family 41 member 3, transcript variant X3	0	0	0	0	0	0.24	0	0	0	0	0.12	0.04	0	0.08	0	0.053333
rna-XM_019266392.2	gene-LOC104919264	LOC104919264	solute carrier family 41 member 3, transcript variant X1	0.84	0.55	0.78	0.43	0.85	0.52	0.77	0.67	0.59	0.64	0.81	0.97	0.723333	0.6	0.676667	0.806667
rna-XM_019266393.2	gene-LOC104919264	LOC104919264	solute carrier family 41 member 3, transcript variant X2	0	0	0	0	0	0	0	0	0	0	0	0	0	0	0	0
rna-XM_019266421.2	gene-LOC104919265	LOC104919265	carbohydrate sulfotransferase 11, transcript variant X1	1.34	1.27	0.64	0.99	2.35	1.95	1.33	3.09	1.05	1.57	2.04	3.21	1.08333	1.76333	1.82333	2.27333
rna-XM_027288558.1	gene-LOC104919265	LOC104919265	carbohydrate sulfotransferase 11, transcript variant X2	4.35	4.65	2.32	3.04	3.91	5.2	2.51	3.44	2.86	2.53	2.22	3.48	3.77333	4.05	2.93667	2.74333
rna-XM_010731237.3	gene-LOC104919266	LOC104919266	MICOS complex subunit mic25a, transcript variant X1	0	0	0	0	0	0	0	0	0	0	0	0	0	0	0	0
rna-XM_010731238.3	gene-LOC104919266	LOC104919266	MICOS complex subunit mic25a, transcript variant X2	10.77	10.34	10.25	10.13	8.22	10.07	11.7	7.78	11.07	11.7	8.7	12.76	10.4533	9.47333	10.1833	11.0533
rna-XM_027288529.1	gene-LOC104919266	LOC104919266	MICOS complex subunit mic25a, transcript variant X3	0	0	0	0	0	0	0	0	0	0	0	0	0	0	0	0
rna-XM_010731240.3	gene-LOC104919267	LOC104919267	E3 ubiquitin/ISG15 ligase TRIM25	0	0	0	0	0	0	0.03	0	0	0	0	0	0	0	0.01	0
rna-XM_019266396.2	gene-LOC104919268	LOC104919268	copine-9	0	0	0	0	0	0	0	0	0	0	0	0	0	0	0	0
rna-XM_019266391.2	gene-LOC104919269	LOC104919269	Krueppel-like factor 15	0	0	0	0.07	0	0.13	0.05	0.04	0.02	0.13	0.02	0	0	0.066667	0.036667	0.05
rna-XM_010731243.3	gene-LOC104919270	LOC104919270	plexin-A1, transcript variant X2	0.47	0.54	0.36	0.57	0	0.57	0.38	0.57	0.43	0.14	0	0.35	0.456667	0.38	0.46	0.163333
rna-XM_019272556.2	gene-LOC104919270	LOC104919270	plexin-A1, transcript variant X1	0	0	0	0	0.38	0	0.14	0	0.21	0.26	0.4	0	0	0.126667	0.116667	0.22
rna-XM_019259855.2	gene-LOC104919274	LOC104919274	tetraspanin-36	156.99	167.84	159.02	154.89	168.83	129.77	119.12	123.48	147.84	140.64	142.45	163.52	161.283	151.163	130.147	148.87
rna-XM_010731249.3	gene-LOC104919275	LOC104919275	protamine-like protein	273.27	254.35	201.24	633.88	115.52	222.39	217.1	94.28	179.5	151.16	87.88	996.54	242.953	323.93	163.627	411.86
rna-XM_010731250.3	gene-LOC104919276	LOC104919276	perforin-1, transcript variant X1	0.27	0	0.58	1.18	0.91	0.15	0.51	0.47	0.59	0.42	0.53	0.38	0.283333	0.746667	0.523333	0.443333
rna-XM_010731251.3	gene-LOC104919276	LOC104919276	perforin-1, transcript variant X2	0.55	0.66	0.72	0	0	0.59	1	0.16	0.7	0.14	0.17	0.25	0.643333	0.196667	0.62	0.186667
rna-XM_027273607.1	gene-LOC104919276	LOC104919276	perforin-1, transcript variant X3	0.48	0.91	0.52	0.69	0.76	1.04	0.34	0.66	0.45	0.53	0.81	0.71	0.636667	0.83	0.483333	0.683333
rna-XM_019259890.2	gene-LOC104919295	LOC104919295	serine/threonine-protein kinase D3, transcript variant X1	6.91	6.69	5.91	7.54	7.96	8.23	6.21	7.97	7.66	9.08	8.83	4.14	6.50333	7.91	7.28	7.35
rna-XM_019259896.2	gene-LOC104919295	LOC104919295	serine/threonine-protein kinase D3, transcript variant X2	1.23	0.29	0.81	0.18	0.17	0.33	0.82	0.88	0.61	0.49	0.69	1.63	0.776667	0.226667	0.77	0.936667
rna-XM_010731276.3	gene-LOC104919296	LOC104919296	hepatocyte nuclear factor 3-beta	0	0	0	0	0	0	0	0	0	0	0	0	0	0	0	0
rna-XM_010731277.3	gene-LOC104919298	LOC104919298	paired box protein Pax-1	0	0	0	0	0	0	0	0	0	0	0	0	0	0	0	0
rna-XM_027274521.1	gene-LOC104919299	LOC104919299	homeobox protein Nkx-2.2a, transcript variant X1	0	0	0	0	0	0	0	0	0	0	0	0	0	0	0	0
rna-XM_027274522.1	gene-LOC104919299	LOC104919299	homeobox protein Nkx-2.2a, transcript variant X2	0	0	0	0	0	0	0	0	0	0	0	0	0	0	0	0
rna-XM_027274523.1	gene-LOC104919299	LOC104919299	homeobox protein Nkx-2.2a, transcript variant X3	0	0	0	0	0	0	0	0	0	0	0	0	0	0	0	0
rna-XM_027274524.1	gene-LOC104919299	LOC104919299	homeobox protein Nkx-2.2a, transcript variant X4	0	0	0	0	0	0	0	0	0	0	0	0	0	0	0	0
rna-XM_027274525.1	gene-LOC104919299	LOC104919299	homeobox protein Nkx-2.2a, transcript variant X5	0	0	0	0	0	0	0	0	0	0	0	0	0	0	0	0
rna-XM_027274526.1	gene-LOC104919299	LOC104919299	homeobox protein Nkx-2.2a, transcript variant X6	0	0	0	0	0	0	0	0	0	0	0	0	0	0	0	0
rna-XM_027274527.1	gene-LOC104919299	LOC104919299	homeobox protein Nkx-2.2a, transcript variant X7	0	0	0	0	0	0	0	0.06	0	0	0	0	0	0	0.02	0
rna-XM_027274528.1	gene-LOC104919299	LOC104919299	homeobox protein Nkx-2.2a, transcript variant X8	0	0	0	0	0	0	0	0	0	0	0	0	0	0	0	0
rna-XM_027274530.1	gene-LOC104919299	LOC104919299	homeobox protein Nkx-2.2a, transcript variant X9	0	0	0	0	0	0	0	0	0	0	0	0	0	0	0	0
rna-XM_027275114.1	gene-LOC104919300	LOC104919300	homeobox protein Nkx-2.4, transcript variant X1	0	0	0	0	0	0	0	0	0	0	0	0	0	0	0	0
rna-XM_027275115.1	gene-LOC104919300	LOC104919300	homeobox protein Nkx-2.4, transcript variant X2	0	0	0	0	0	0	0	0	0	0	0	0	0	0	0	0
rna-XM_010731286.3	gene-LOC104919302	LOC104919302	insulinoma-associated protein 1b	0	0	0	0	0	0	0	0	0	0	0	0	0	0	0	0
rna-XM_010731291.3	gene-LOC104919305	LOC104919305	gap junction beta-3 protein	0.1	0.03	0.06	0.08	0.09	0.11	0	0.06	0.11	0.12	0	0.18	0.063333	0.093333	0.056667	0.1
rna-XM_010731292.3	gene-LOC104919306	LOC104919306	gap junction beta-4 protein, transcript variant X1	0	0	0	0	0.14	0	0	0	0	0	0.23	0	0	0.046667	0	0.076667
rna-XM_010731293.3	gene-LOC104919306	LOC104919306	gap junction beta-4 protein, transcript variant X2	0	0	0	0	0	0	0	0	0	0	0	0	0	0	0	0
rna-XM_019261313.2	gene-LOC104919306	LOC104919306	gap junction beta-4 protein, transcript variant X3	0.09	0	0	0.15	0	0.08	0	0.17	0.22	0.16	0	0	0.03	0.076667	0.13	0.053333
rna-XM_010731295.3	gene-LOC104919308	LOC104919308	uncharacterized LOC104919308	0	0	0	0	0	0	0	0	1.35	0	0	0	0	0	0.45	0
rna-XM_010731297.3	gene-LOC104919309	LOC104919309	keratinocyte-associated protein 3	9.28	4.97	7.47	6.62	5.36	6.08	7.61	6.68	5.77	7.46	6.66	6.24	7.24	6.02	6.68667	6.78667
rna-XM_010731298.3	gene-LOC104919311	LOC104919311	probable histone deacetylase 1-B, transcript variant X2	9.17	8.57	9.87	7.82	9.09	7.71	11.35	6.28	9.76	8.43	9.84	8.02	9.20333	8.20667	9.13	8.76333
rna-XM_027275125.1	gene-LOC104919311	LOC104919311	probable histone deacetylase 1-B, transcript variant X1	94.1	77.27	84.06	83.04	81.49	78.81	81.44	82.62	82.41	83.07	81.88	78.61	85.1433	81.1133	82.1567	81.1867
rna-XM_027275126.1	gene-LOC104919311	LOC104919311	probable histone deacetylase 1-B, transcript variant X3	0.29	0	0	0.63	0	0	0	0	0	0	0	0	0.096667	0.21	0	0
rna-XM_027275127.1	gene-LOC104919311	LOC104919311	probable histone deacetylase 1-B, transcript variant X4	0	0	0	0	0	0	0	0	0	0.15	0	0	0	0	0	0.05
rna-XM_019266369.2	gene-LOC104919314	LOC104919314	myotubularin-related protein 9-like, transcript variant X1	9.59	9.39	11.07	5.47	10.56	7.62	8.95	7.1	10.06	7.47	8.87	10.09	10.0167	7.88333	8.70333	8.81
rna-XM_019266370.2	gene-LOC104919314	LOC104919314	myotubularin-related protein 9-like, transcript variant X2	3.52	2.28	4.58	2.32	4.8	3.28	3.29	4.09	3.58	2.48	2.92	2.41	3.46	3.46667	3.65333	2.60333
rna-XM_010731309.3	gene-LOC104919320	LOC104919320	microsomal glutathione S-transferase 3	96.13	219.49	142.7	129.67	120.6	103.26	116.36	150.04	154.76	128.71	111.42	182.51	152.773	117.843	140.387	140.88
rna-XM_010731310.3	gene-LOC104919321	LOC104919321	ammonium transporter Rh type A	3.61	3.28	3.16	4.42	1.34	1.9	2.2	1.44	2	2.37	1.77	6.19	3.35	2.55333	1.88	3.44333
rna-XM_019259695.2	gene-LOC104919326	LOC104919326	glutaminyl-peptide cyclotransferase	2.13	3.29	3.12	3.4	6.89	3.88	0.83	2.93	0.92	4.69	7.47	3.91	2.84667	4.72333	1.56	5.35667
rna-XM_019261308.2	gene-LOC104919328	LOC104919328	kazal-type serine protease inhibitor domain-containing protein 1	0	0	0	0	0	0.03	0	0	0	0.09	0	0	0	0.01	0	0.03
rna-XM_010731336.3	gene-LOC104919342	LOC104919342	aflatoxin B1 aldehyde reductase member 4	18.5	19.65	19.37	17.24	16.71	17.52	18	20.02	18.99	17.75	16.78	17.77	19.1733	17.1567	19.0033	17.4333
rna-XM_010731339.3	gene-LOC104919344	LOC104919344	voltage-gated potassium channel subunit beta-2, transcript variant X1	7.63	4.07	5.99	5.64	3.22	2.85	4.86	3.42	7.17	4	3.76	5.2	5.89667	3.90333	5.15	4.32
rna-XM_010731341.3	gene-LOC104919344	LOC104919344	voltage-gated potassium channel subunit beta-2, transcript variant X7	2.67	0	1.48	0.08	0	0.93	3.01	1.76	3.97	1.82	0.1	0	1.38333	0.336667	2.91333	0.64
rna-XM_019260769.2	gene-LOC104919344	LOC104919344	voltage-gated potassium channel subunit beta-2, transcript variant X2	0	0	0	0	0	0	0	0.64	0	0	0	0.14	0	0	0.213333	0.046667
rna-XM_019260770.2	gene-LOC104919344	LOC104919344	voltage-gated potassium channel subunit beta-2, transcript variant X3	0	0.18	0	0	0	0	0.4	1.22	0	0	0	0.33	0.06	0	0.54	0.11
rna-XM_027279768.1	gene-LOC104919344	LOC104919344	voltage-gated potassium channel subunit beta-2, transcript variant X4	0	0	0	0	0	0	0	0	0	0	0	0	0	0	0	0
rna-XM_027279769.1	gene-LOC104919344	LOC104919344	voltage-gated potassium channel subunit beta-2, transcript variant X5	0	0	0	0	0	0	0.26	0	0	0	0	0	0	0	0.086667	0
rna-XM_027279770.1	gene-LOC104919344	LOC104919344	voltage-gated potassium channel subunit beta-2, transcript variant X6	0	0	0	0.11	0.14	0.7	0.12	0.14	0.21	0.24	0.65	0	0	0.316667	0.156667	0.296667
rna-XM_027278876.1	gene-LOC104919349	LOC104919349	mucin-3A	0	0	0	0	0	0	0.08	0.04	0	0	0	0.04	0	0	0.04	0.013333
rna-XM_010731352.3	gene-LOC104919351	LOC104919351	taste receptor type 1 member 3	0	0	0	0	0	0	0	0	0	0	0	0	0	0	0	0
rna-XM_010731353.3	gene-LOC104919353	LOC104919353	parathymosin	432.06	349.85	362.07	282.07	260.25	323.21	344.87	355.17	404.39	385.49	293.03	298.31	381.327	288.51	368.143	325.61
rna-XM_010731359.3	gene-LOC104919357	LOC104919357	tumor necrosis factor receptor superfamily member 1B	39.97	44.8	57.39	50.86	51.26	44.48	48.98	57.53	41.79	47.98	60.39	55.81	47.3867	48.8667	49.4333	54.7267
rna-XM_019262902.2	gene-LOC104919359	LOC104919359	zinc finger protein 362-like, transcript variant X1	0.11	0.68	0.74	0.73	0.13	1.26	0.83	0.76	0.99	1.08	1.02	0.65	0.51	0.706667	0.86	0.916667
rna-XM_019262903.2	gene-LOC104919359	LOC104919359	zinc finger protein 362-like, transcript variant X5	1.45	0.83	0.34	0.58	1	0.63	0.78	1.13	0.68	0.68	0.49	0.61	0.873333	0.736667	0.863333	0.593333
rna-XM_027279799.1	gene-LOC104919359	LOC104919359	zinc finger protein 362-like, transcript variant X2	0	0	0	0	0	0	0	0	0	0.12	0	0	0	0	0	0.04
rna-XM_027279800.1	gene-LOC104919359	LOC104919359	zinc finger protein 362-like, transcript variant X3	0	0	0.18	0	0	0	0	0	0	0	0	0	0.06	0	0	0
rna-XM_027279801.1	gene-LOC104919359	LOC104919359	zinc finger protein 362-like, transcript variant X4	0	0	0	0	0	0	0	0	0	0	0	0	0	0	0	0
rna-XM_027279802.1	gene-LOC104919359	LOC104919359	zinc finger protein 362-like, transcript variant X6	0	0	0	0	0	0	0	0	0	0	0	0	0	0	0	0
rna-XM_027279630.1	gene-LOC104919360	LOC104919360	N-acetyllactosaminide alpha-1,3-galactosyltransferase-like, transcript variant X1	0	0	0	0.06	0	0.17	0	0	0	0	0.15	0	0	0.076667	0	0.05
rna-XM_027279631.1	gene-LOC104919360	LOC104919360	N-acetyllactosaminide alpha-1,3-galactosyltransferase-like, transcript variant X2	0	0	0	0	0	0	0	0	0	0	0	0	0	0	0	0
rna-XM_027279632.1	gene-LOC104919360	LOC104919360	N-acetyllactosaminide alpha-1,3-galactosyltransferase-like, transcript variant X3	0	0	0	0	0.26	0	0.3	0	0	0	0	0	0	0.086667	0.1	0
rna-XM_027279633.1	gene-LOC104919360	LOC104919360	N-acetyllactosaminide alpha-1,3-galactosyltransferase-like, transcript variant X4	0	0	0.13	0	0.13	0.11	0	0.24	0.15	0.19	0	0.09	0.043333	0.08	0.13	0.093333
rna-XM_019263770.2	gene-LOC104919361	LOC104919361	neuronal acetylcholine receptor subunit alpha-3	0	0	0	0	0	0	0	0	0	0	0	0	0	0	0	0
rna-XM_019262928.2	gene-LOC104919363	LOC104919363	epithelial membrane protein 3, transcript variant X1	0	2.15	0.61	0	0.59	0.61	0.59	0	0	0	1.01	0.42	0.92	0.4	0.196667	0.476667
rna-XM_027279635.1	gene-LOC104919363	LOC104919363	epithelial membrane protein 3, transcript variant X2	9.74	13.39	13.04	17.1	29.48	13.11	16.53	15.31	11.5	18.49	24.5	19.15	12.0567	19.8967	14.4467	20.7133
rna-XM_010731372.3	gene-LOC104919368	LOC104919368	forkhead box protein J3, transcript variant X1	0	0	0	0	0	0	0	0	0	0	0	0	0	0	0	0
rna-XM_019262943.2	gene-LOC104919368	LOC104919368	forkhead box protein J3, transcript variant X2	0.08	0	0.05	0.17	0	0	0.06	0.05	0	0.05	0.05	0	0.043333	0.056667	0.036667	0.033333
rna-XM_019262944.2	gene-LOC104919368	LOC104919368	forkhead box protein J3, transcript variant X4	0	0	0	0	0	0	0	0	0	0	0	0	0	0	0	0
rna-XM_019262945.2	gene-LOC104919368	LOC104919368	forkhead box protein J3, transcript variant X5	0	0.06	0	0.15	0	0.15	0.1	0.15	0.19	0.22	0.08	0.05	0.02	0.1	0.146667	0.116667
rna-XM_027279814.1	gene-LOC104919368	LOC104919368	forkhead box protein J3, transcript variant X3	0	0	0.06	0	0	0	0	0	0	0	0	0	0.02	0	0	0
rna-XM_010731379.3	gene-LOC104919371	LOC104919371	vitamin D 25-hydroxylase	0	0	0	0	0	0	0	0	0	0.02	0	0	0	0	0	0.006667
rna-XM_027279444.1	gene-LOC104919372	LOC104919372	multiple epidermal growth factor-like domains protein 6	0	0	0	0	0	0	0	0	0	0	0	0	0	0	0	0
rna-XM_019262929.2	gene-LOC104919373	LOC104919373	coiled-coil domain-containing protein 114, transcript variant X1	0	0	0	0	0	0	0	0	0	0	0	0	0	0	0	0
rna-XM_019262930.2	gene-LOC104919373	LOC104919373	coiled-coil domain-containing protein 114, transcript variant X2	0	0	0	0	0	0	0	0	0	0	0	0	0	0	0	0
rna-XM_019262931.2	gene-LOC104919373	LOC104919373	coiled-coil domain-containing protein 114, transcript variant X3	0	0	0	0	0	0	0	0	0	0	0	0	0	0	0	0
rna-XM_019262932.2	gene-LOC104919373	LOC104919373	coiled-coil domain-containing protein 114, transcript variant X4	0	0	0	0	0.03	0.05	0.03	0	0.02	0	0	0	0	0.026667	0.016667	0
rna-XM_019262926.2	gene-LOC104919375	LOC104919375	uncharacterized LOC104919375	0	0.02	0	0.05	0.02	0.05	0.1	0.08	0.05	0.05	0	0.02	0.006667	0.04	0.076667	0.023333
rna-XM_027279624.1	gene-LOC104919377	LOC104919377	coiled-coil domain-containing protein 30, transcript variant X1	0	0	0	0	0	0	0	0	0	0	0	0	0	0	0	0
rna-XM_027279625.1	gene-LOC104919377	LOC104919377	coiled-coil domain-containing protein 30, transcript variant X2	0	0	0.74	0	0	0.31	0.24	0	0	0.32	0.49	0	0.246667	0.103333	0.08	0.27
rna-XM_027279627.1	gene-LOC104919377	LOC104919377	coiled-coil domain-containing protein 30, transcript variant X3	0.52	0.37	0.22	0.71	1.33	0.61	0.38	1.44	0	0.36	0.25	0.57	0.37	0.883333	0.606667	0.393333
rna-XM_027279628.1	gene-LOC104919377	LOC104919377	coiled-coil domain-containing protein 30, transcript variant X4	0.62	1.09	0.19	0	0.45	0.39	0	0	0.57	0.48	0	0	0.633333	0.28	0.19	0.16
rna-XM_027279629.1	gene-LOC104919377	LOC104919377	coiled-coil domain-containing protein 30, transcript variant X6	0	0	0	0	0	0	0	0	0	0	0	0	0	0	0	0
rna-XR_003462487.1	gene-LOC104919377	LOC104919377	coiled-coil domain-containing protein 30, transcript variant X5	0.1	0	0	0	0	0	0	0	0.11	0	0	0.08	0.033333	0	0.036667	0.026667
rna-XM_010731383.3	gene-LOC104919378	LOC104919378	uncharacterized LOC104919378, transcript variant X2	0.22	0.18	0.09	0.24	0.07	0	0.27	0.05	0.46	0.09	0.05	0.1	0.163333	0.103333	0.26	0.08
rna-XM_027279563.1	gene-LOC104919378	LOC104919378	uncharacterized LOC104919378, transcript variant X1	0	0	0	0	0	0.14	0	0	0	0	0	0	0	0.046667	0	0
rna-XM_010731393.3	gene-LOC104919385	LOC104919385	lysophosphatidic acid receptor 6	6.96	7.74	10.41	6.99	9.31	7.47	9.24	10.24	10.5	8.84	7.36	6.22	8.37	7.92333	9.99333	7.47333
rna-XM_019260747.2	gene-LOC104919390	LOC104919390	synaptotagmin-7, transcript variant X1	0	0	0	0	0	0	0	0	0	0	0	0	0	0	0	0
rna-XM_019260748.2	gene-LOC104919390	LOC104919390	synaptotagmin-7, transcript variant X2	0	0	0	0	0	0	0	0	0	0	0	0	0	0	0	0
rna-XM_019260749.2	gene-LOC104919390	LOC104919390	synaptotagmin-7, transcript variant X3	0.01	0	0	0	0	0	0	0	0	0	0	0	0.003333	0	0	0
rna-XM_019270109.2	gene-LOC104919392	LOC104919392	period circadian protein homolog 2, transcript variant X2	5.23	3.81	4.99	4.13	5.25	5.74	4.06	3.65	5.43	4.12	3.78	3	4.67667	5.04	4.38	3.63333
rna-XM_027280259.1	gene-LOC104919392	LOC104919392	period circadian protein homolog 2, transcript variant X1	0	0	0.22	0	0	0.64	0.67	0.59	0.48	0	0.18	0	0.073333	0.213333	0.58	0.06
rna-XM_010731403.3	gene-LOC104919393	LOC104919393	transcription cofactor HES-6	0.46	0.03	0.5	0.07	0.34	0.56	0.38	0.18	0.1	0	0.04	0.1	0.33	0.323333	0.22	0.046667
rna-XM_010731404.3	gene-LOC104919394	LOC104919394	transcription cofactor HES-6, transcript variant X1	0	0	0.19	0	0	0	0	0	0.11	0.04	0	0	0.063333	0	0.036667	0.013333
rna-XM_027280167.1	gene-LOC104919394	LOC104919394	transcription cofactor HES-6, transcript variant X2	0.22	0.08	0	0.11	0.12	0.07	0.04	0.04	0.14	0.08	0.33	0.14	0.1	0.1	0.073333	0.183333
rna-XM_010731407.3	gene-LOC104919396	LOC104919396	integral membrane protein 2C	14.81	10.62	11.97	12.14	10.98	13.07	14.55	12.44	15.68	13.27	11.38	13.87	12.4667	12.0633	14.2233	12.84
rna-XM_010731415.3	gene-LOC104919402	LOC104919402	transmembrane anterior posterior transformation protein 1 homolog, transcript variant X2	5.68	4.59	5.08	4.97	5.34	4.1	4.86	5.21	4.63	5.06	5.07	3.91	5.11667	4.80333	4.9	4.68
rna-XM_019258462.2	gene-LOC104919402	LOC104919402	transmembrane anterior posterior transformation protein 1 homolog, transcript variant X1	0	0	0	0	0	0.55	0.19	0	0.78	0	0.56	1.22	0	0.183333	0.323333	0.593333
rna-XM_010731416.3	gene-LOC104919403	LOC104919403	annexin A5, transcript variant X1	0	0	0	0.15	0	0.05	0	0	0	0.1	0	0	0	0.066667	0	0.033333
rna-XM_019258443.2	gene-LOC104919403	LOC104919403	annexin A5, transcript variant X2	0.18	0.04	0.13	0	0.12	0	0.04	0.09	0.08	0.29	0.09	0.04	0.116667	0.04	0.07	0.14
rna-XM_010731424.3	gene-LOC104919408	LOC104919408	amyloid-beta A4 precursor protein-binding family A member 2	0	0.01	0	0	0.01	0	0.04	0.01	0	0	0	0	0.003333	0.003333	0.016667	0
rna-XM_010731423.3	gene-LOC104919411	LOC104919411	catechol O-methyltransferase, transcript variant X1	0	0	0	0	0.05	0.1	0	0	0	0.05	0	0	0	0.05	0	0.016667
rna-XM_027280896.1	gene-LOC104919411	LOC104919411	catechol O-methyltransferase, transcript variant X2	0	0	0	0	0	0	0	0	0	0	0	0	0	0	0	0
rna-XM_027280897.1	gene-LOC104919411	LOC104919411	catechol O-methyltransferase, transcript variant X3	0	0	0	0	0	0	0	0	0	0	0	0	0	0	0	0
rna-XM_027280898.1	gene-LOC104919411	LOC104919411	catechol O-methyltransferase, transcript variant X4	0	0	0	0	0	0	0	0	0	0	0	0	0	0	0	0
rna-XM_027280899.1	gene-LOC104919411	LOC104919411	catechol O-methyltransferase, transcript variant X5	0	0	0	0	0	0	0.06	0	0.12	0	0	0.12	0	0	0.06	0.04
rna-XM_027280900.1	gene-LOC104919411	LOC104919411	catechol O-methyltransferase, transcript variant X6	0	0	0	0	0	0	0	0	0	0	0	0	0	0	0	0
rna-XM_010731425.3	gene-LOC104919412	LOC104919412	cathepsin Z	0	0	0	0	0	0	0	0	0.4	0	0	0	0	0	0.133333	0
rna-XM_010731426.3	gene-LOC104919413	LOC104919413	nanos homolog 1	0.3	0.45	0.43	0.29	0.29	0.61	0.34	0.55	0.46	0.27	0.18	0.36	0.393333	0.396667	0.45	0.27
rna-XM_010731427.3	gene-LOC104919415	LOC104919415	transcription factor LBX1	0.02	0	0.04	0.06	0.17	0.06	0.02	0.02	0.02	0.07	0.16	0	0.02	0.096667	0.02	0.076667
rna-XM_010731430.3	gene-LOC104919417	LOC104919417	fibroblast growth factor 18	0.11	0.14	0.08	0.31	0.14	0.14	0.13	0.29	0.18	0.16	0.13	0.13	0.11	0.196667	0.2	0.14
rna-XM_010731431.3	gene-LOC104919418	LOC104919418	nucleophosmin	23.85	19.23	19.72	18.49	18.31	17.54	19.08	20.23	22.48	20.44	19.24	17.41	20.9333	18.1133	20.5967	19.03
rna-XM_010731432.3	gene-LOC104919420	LOC104919420	T-cell leukemia homeobox protein 2, transcript variant X3	0	0.75	0.67	0	1.29	0	0	0.68	2.58	0.35	0.58	1.29	0.473333	0.43	1.08667	0.74
rna-XM_027282525.1	gene-LOC104919420	LOC104919420	T-cell leukemia homeobox protein 2, transcript variant X1	0.94	0	0	1.68	0	1.08	0.78	0	0	0.92	1.31	0	0.313333	0.92	0.26	0.743333
rna-XM_027282561.1	gene-LOC104919420	LOC104919420	T-cell leukemia homeobox protein 2, transcript variant X2	0.76	1.42	0.98	1.78	2.13	1.64	0.93	2.14	1.96	2.79	2.24	3.21	1.05333	1.85	1.67667	2.74667
rna-XM_019258467.2	gene-LOC104919422	LOC104919422	prominin-1-A, transcript variant X2	0	0.08	0	0	0.1	0	0	0	0	0	0.12	0	0.026667	0.033333	0	0.04
rna-XM_019258468.2	gene-LOC104919422	LOC104919422	prominin-1-A, transcript variant X11	0	0	0.09	0	0	0	0	0	0	0	0.03	0	0.03	0	0	0.01
rna-XM_019258469.2	gene-LOC104919422	LOC104919422	prominin-1-A, transcript variant X12	0.06	0.04	0	0	0	0	0	0.03	0	0.1	0	0.03	0.033333	0	0.01	0.043333
rna-XM_019258470.2	gene-LOC104919422	LOC104919422	prominin-1-A, transcript variant X15	0	0	0	0.07	0	0	0	0	0	0	0	0	0	0.023333	0	0
rna-XR_002041908.2	gene-LOC104919422	LOC104919422	prominin-1-A, transcript variant X1	0	0	0	0	0.03	0	0	0.01	0	0	0	0	0	0.01	0.003333	0
rna-XR_002041910.2	gene-LOC104919422	LOC104919422	prominin-1-A, transcript variant X3	0.12	0	0	0	0.06	0	0	0	0	0	0	0	0.04	0.02	0	0
rna-XR_002041911.2	gene-LOC104919422	LOC104919422	prominin-1-A, transcript variant X4	0	0	0	0	0	0.06	0	0.12	0	0	0	0	0	0.02	0.04	0
rna-XR_002041912.2	gene-LOC104919422	LOC104919422	prominin-1-A, transcript variant X5	0	0	0	0	0.07	0.03	0	0.06	0	0	0	0	0	0.033333	0.02	0
rna-XR_002041913.2	gene-LOC104919422	LOC104919422	prominin-1-A, transcript variant X6	0	0.05	0	0	0	0.14	0.43	0	0.05	0.03	0.08	0	0.016667	0.046667	0.16	0.036667
rna-XR_002041914.2	gene-LOC104919422	LOC104919422	prominin-1-A, transcript variant X7	0	0	0.11	0	0.16	0	0	0.04	0	0.11	0.07	0.16	0.036667	0.053333	0.013333	0.113333
rna-XR_002041915.2	gene-LOC104919422	LOC104919422	prominin-1-A, transcript variant X9	0.2	0.13	0	0.18	0	0.22	0	0.21	0.17	0.18	0.07	0.08	0.11	0.133333	0.126667	0.11
rna-XR_002041916.2	gene-LOC104919422	LOC104919422	prominin-1-A, transcript variant X10	0.1	0.2	0.29	0.32	0.1	0.16	0.2	0.07	0.44	0.22	0.24	0.19	0.196667	0.193333	0.236667	0.216667
rna-XR_002041917.2	gene-LOC104919422	LOC104919422	prominin-1-A, transcript variant X13	0	0	0	0	0	0	0	0	0.06	0	0	0	0	0	0.02	0
rna-XR_002041918.2	gene-LOC104919422	LOC104919422	prominin-1-A, transcript variant X14	0	0	0	0	0	0.06	0	0	0	0	0	0	0	0.02	0	0
rna-XR_003462649.1	gene-LOC104919422	LOC104919422	prominin-1-A, transcript variant X8	0	0.09	0	0	0	0	0	0	0	0	0	0	0.03	0	0	0
rna-XM_010731438.3	gene-LOC104919423	LOC104919423	fibroblast growth factor-binding protein 1	0	0	0	0	0	0	0	0	0	0	0	0	0	0	0	0
rna-XM_010731439.3	gene-LOC104919424	LOC104919424	thymocyte selection-associated high mobility group box protein TOX, transcript variant X1	1.99	0.66	2.14	1.66	2.31	2.83	2.1	2.07	1.65	2.12	1.2	1.22	1.59667	2.26667	1.94	1.51333
rna-XM_010731440.3	gene-LOC104919424	LOC104919424	thymocyte selection-associated high mobility group box protein TOX, transcript variant X2	0.21	1.12	0.43	1.51	0.66	0.71	0.53	0.84	1.55	0.99	1.24	0.74	0.586667	0.96	0.973333	0.99
rna-XM_019274689.2	gene-LOC104919424	LOC104919424	thymocyte selection-associated high mobility group box protein TOX, transcript variant X3	3.09	2.98	2.3	2.33	2.02	2.59	3.02	2.32	3.3	2.24	3.21	2.26	2.79	2.31333	2.88	2.57
rna-XM_010731441.3	gene-LOC104919425	LOC104919425	WAP four-disulfide core domain protein 18, transcript variant X1	18.02	22.68	20.69	22.72	16.25	22.77	17.76	23.8	24.83	29.71	21.77	19.66	20.4633	20.58	22.13	23.7133
rna-XM_010731442.3	gene-LOC104919425	LOC104919425	WAP four-disulfide core domain protein 18, transcript variant X2	28.17	27.98	25.88	21.93	16.87	37.07	33.25	28.75	39.31	32.24	21.59	16.89	27.3433	25.29	33.77	23.5733
rna-XM_010731444.3	gene-LOC104919428	LOC104919428	protein phosphatase 1 regulatory subunit 3D-like, transcript variant X1	3.04	2.54	2.88	2.52	2.5	2.77	2.98	3.29	2.7	3.12	2.38	1.95	2.82	2.59667	2.99	2.48333
rna-XM_027288489.1	gene-LOC104919428	LOC104919428	protein phosphatase 1 regulatory subunit 3D-like, transcript variant X2	0	0	0.26	0	0	0	0	0	0	0	0.34	0.13	0.086667	0	0	0.156667
rna-XM_010731446.3	gene-LOC104919429	LOC104919429	Hypothetical protein	3.24	2.76	3.66	2.79	2.7	2.34	3.02	2.33	3.68	3.07	2.96	3.33	3.22	2.61	3.01	3.12
rna-XM_019274682.2	gene-LOC104919431	LOC104919431	band 4.1-like protein 1	0	0	0	0	0	0	0	0	0	0	0	0	0	0	0	0
rna-XM_010731461.3	gene-LOC104919443	LOC104919443	macrophage colony-stimulating factor 1 receptor 2	46.8	56.84	56.02	62.74	81.85	62.38	54.74	58.09	48.46	67.79	72.42	59.49	53.22	68.99	53.7633	66.5667
rna-XM_010731462.3	gene-LOC104919444	LOC104919444	platelet-derived growth factor receptor beta, transcript variant X1	4.81	5.8	5.84	5.24	7.72	7.49	6.64	5.46	5.5	7.84	5.65	6.19	5.48333	6.81667	5.86667	6.56
rna-XM_027273930.1	gene-LOC104919444	LOC104919444	platelet-derived growth factor receptor beta, transcript variant X2	0	0	0	0.78	0.73	0.15	0.16	0	0	0.35	0.18	0.3	0	0.553333	0.053333	0.276667
rna-XM_027273931.1	gene-LOC104919444	LOC104919444	platelet-derived growth factor receptor beta, transcript variant X3	0	0.47	0.5	0.24	0.13	0.22	0	0	0	0	0.29	0	0.323333	0.196667	0	0.096667
rna-XM_010731466.3	gene-LOC104919445	LOC104919445	arf-GAP with Rho-GAP domain, ANK repeat and PH domain-containing protein 1, transcript variant X1	2.21	1.47	1.89	2.38	3.99	0.67	2.64	0.94	0.31	0.8	1.65	1.77	1.85667	2.34667	1.29667	1.40667
rna-XM_019269398.2	gene-LOC104919445	LOC104919445	arf-GAP with Rho-GAP domain, ANK repeat and PH domain-containing protein 1, transcript variant X2	0	0.15	0.29	0.95	0	0.1	0.32	0	0.35	0.53	0.65	0.75	0.146667	0.35	0.223333	0.643333
rna-XM_027288780.1	gene-LOC104919447	LOC104919447	peptidyl-prolyl cis-trans isomerase FKBP1A	21.11	13.7	15.34	19.48	14.55	19.71	17.6	21.12	19.76	17.9	16.51	16.23	16.7167	17.9133	19.4933	16.88
rna-XM_019274664.2	gene-LOC104919448	LOC104919448	phosphatase and actin regulator 3, transcript variant X1	0	0	0	0	0	0	0	0	0	0	0	0	0	0	0	0
rna-XM_019274665.2	gene-LOC104919448	LOC104919448	phosphatase and actin regulator 3, transcript variant X2	0	0	0.11	0	0	0.05	0	0	0.05	0.03	0	0	0.036667	0.016667	0.016667	0.01
rna-XM_019274685.2	gene-LOC104919451	LOC104919451	contactin-4, transcript variant X1	0.2	0.19	0.02	0.38	0.42	0.26	0.1	0.41	0.17	0.19	0.25	0.3	0.136667	0.353333	0.226667	0.246667
rna-XM_019274686.2	gene-LOC104919451	LOC104919451	contactin-4, transcript variant X2	0	0.07	0.08	0	0	0	0.06	0	0	0.5	0	0	0.05	0	0.02	0.166667
rna-XM_027288595.1	gene-LOC104919451	LOC104919451	contactin-4, transcript variant X3	0.21	0.44	0.12	0	0.04	0.12	0.09	0.03	0.22	0	0.33	0	0.256667	0.053333	0.113333	0.11
rna-XM_027288915.1	gene-LOC104919452	LOC104919452	neural cell adhesion molecule L1-like protein, transcript variant X1	0	0	0	0	0	0	0	0	0	0	0	0	0	0	0	0
rna-XM_027288916.1	gene-LOC104919452	LOC104919452	neural cell adhesion molecule L1-like protein, transcript variant X2	0	0	0	0	0.45	0	0.21	0.32	0	0.17	0	0.14	0	0.15	0.176667	0.103333
rna-XM_027288917.1	gene-LOC104919452	LOC104919452	neural cell adhesion molecule L1-like protein, transcript variant X3	0	0	0	0	0	0	0	0	0	0	0	0	0	0	0	0
rna-XM_027288918.1	gene-LOC104919452	LOC104919452	neural cell adhesion molecule L1-like protein, transcript variant X4	0	0	0	0	0.01	0	0	0	0	0	0	0	0	0.003333	0	0
rna-XM_027288919.1	gene-LOC104919452	LOC104919452	neural cell adhesion molecule L1-like protein, transcript variant X5	0.24	0.52	0	0	0.25	0.68	0	0	0.48	0.4	0.88	0.73	0.253333	0.31	0.16	0.67
rna-XM_027288920.1	gene-LOC104919452	LOC104919452	neural cell adhesion molecule L1-like protein, transcript variant X6	0.43	0.18	0.67	0.86	0.43	0.17	0.37	0	0.59	0.42	0.2	0	0.426667	0.486667	0.32	0.206667
rna-XM_019274690.2	gene-LOC104919453	LOC104919453	contactin-3-like, transcript variant X1	0	0	0	0	0	0	0	0	0	0	0	0	0	0	0	0
rna-XM_019274691.2	gene-LOC104919453	LOC104919453	contactin-3-like, transcript variant X2	0.39	0.23	0.36	0.3	0.32	0.42	0.46	0.32	0.22	0.37	0.48	0.22	0.326667	0.346667	0.333333	0.356667
rna-XM_027273776.1	gene-LOC104919456	LOC104919456	A disintegrin and metalloproteinase with thrombospondin motifs 2, transcript variant X1	2.17	1.79	1.43	1.67	1.27	2.28	1.95	1.78	2.68	2.02	1.14	1.24	1.79667	1.74	2.13667	1.46667
rna-XM_027273777.1	gene-LOC104919456	LOC104919456	A disintegrin and metalloproteinase with thrombospondin motifs 2, transcript variant X2	0	0	0.18	0	0	0	0.16	0	0	0	0	0	0.06	0	0.053333	0
rna-XM_010731478.3	gene-LOC104919458	LOC104919458	cytochrome b5	28.03	25.66	26.54	27.15	26.5	22.24	22.06	25.91	26.16	25.33	26.99	26.64	26.7433	25.2967	24.71	26.32
rna-XM_010731482.3	gene-LOC104919459	LOC104919459	syntenin-1	90.09	98.73	91.57	101.14	123.83	113.4	92.37	97.41	94.12	96.66	116.63	103.95	93.4633	112.79	94.6333	105.747
rna-XM_019270481.2	gene-LOC104919460	LOC104919460	hepatocyte nuclear factor 4-beta, transcript variant X1	0	0	0	0	0	0	0	0	0	0	0	0	0	0	0	0
rna-XM_019270482.2	gene-LOC104919460	LOC104919460	hepatocyte nuclear factor 4-beta, transcript variant X2	0	0	0	0	0	0	0	0	0	0	0	0	0	0	0	0
rna-XM_027281016.1	gene-LOC104919460	LOC104919460	hepatocyte nuclear factor 4-beta, transcript variant X3	0	0	0	0	0	0	0	0	0	0	0	0	0	0	0	0
rna-XM_010731493.3	gene-LOC104919466	LOC104919466	histamine H2 receptor	0	0	0	0	0	0	0	0	0	0	0	0	0	0	0	0
rna-XM_010731500.3	gene-LOC104919474	LOC104919474	high mobility group protein HMGI-C, transcript variant X1	0.16	0	0	0.48	0.18	0.71	0.76	0	0.23	0	0.64	0.34	0.053333	0.456667	0.33	0.326667
rna-XM_019262907.2	gene-LOC104919474	LOC104919474	high mobility group protein HMGI-C, transcript variant X4	0.06	0	0.22	0.15	0.1	0.28	0.13	0.58	0.2	0.43	0.46	0.27	0.093333	0.176667	0.303333	0.386667
rna-XM_019262908.2	gene-LOC104919474	LOC104919474	high mobility group protein HMGI-C, transcript variant X5	0.23	0.26	0.07	0.65	0.58	0.58	0.33	0.07	0.48	0.26	0.37	0.09	0.186667	0.603333	0.293333	0.24
rna-XM_027279685.1	gene-LOC104919474	LOC104919474	high mobility group protein HMGI-C, transcript variant X2	0.46	1.32	0	0.38	0.78	0	0	1.31	0.58	0.88	0	0.63	0.593333	0.386667	0.63	0.503333
rna-XM_027279686.1	gene-LOC104919474	LOC104919474	high mobility group protein HMGI-C, transcript variant X3	0.47	0	0	0	0	0	0	0	0	0	0.16	0	0.156667	0	0	0.053333
rna-XM_027279687.1	gene-LOC104919474	LOC104919474	high mobility group protein HMGI-C, transcript variant X6	0.36	0	1.47	0.38	0.21	0	0	0.48	0	0	0	0	0.61	0.196667	0.16	0
rna-XM_027279688.1	gene-LOC104919474	LOC104919474	high mobility group protein HMGI-C, transcript variant X7	0	0	0.77	0	0	0	1.04	0	0.32	0	0	0.32	0.256667	0	0.453333	0.106667
rna-XM_019262951.2	gene-LOC104919475	LOC104919475	calglandulin	0.09	0.24	0	0	0.08	0	0.31	0	0.44	0.16	0	0.07	0.11	0.026667	0.25	0.076667
rna-XM_010731504.3	gene-LOC104919476	LOC104919476	guanine nucleotide-binding protein G(I)/G(S)/G(T) subunit beta-1, transcript variant X1	0	0	0	0	0	0	0	0	0	0	0	0	0	0	0	0
rna-XM_019262950.2	gene-LOC104919476	LOC104919476	guanine nucleotide-binding protein G(I)/G(S)/G(T) subunit beta-1, transcript variant X2	8.42	10.75	13.12	10.58	11.1	10.85	9	8.47	10.19	14.14	6.56	8.1	10.7633	10.8433	9.22	9.6
rna-XM_010731508.3	gene-LOC104919478	LOC104919478	growth arrest-specific protein 7, transcript variant X1	3.55	3.17	2.68	4.84	5.64	6.24	3.9	5.37	5	4.98	7.21	4.11	3.13333	5.57333	4.75667	5.43333
rna-XM_010731509.3	gene-LOC104919478	LOC104919478	growth arrest-specific protein 7, transcript variant X2	5.39	6.19	5.99	7.28	8.93	6.37	6.43	5.87	4.88	6.28	9.43	7.57	5.85667	7.52667	5.72667	7.76
rna-XM_019271410.2	gene-LOC104919478	LOC104919478	growth arrest-specific protein 7, transcript variant X3	0	0	0	0	0.18	0	0	0	0	0	0	0	0	0.06	0	0
rna-XM_010731510.3	gene-LOC104919479	LOC104919479	uncharacterized LOC104919479, transcript variant X1	0	0	0	0	0	0	0	0	0	0	0	0	0	0	0	0
rna-XM_010731511.3	gene-LOC104919479	LOC104919479	uncharacterized LOC104919479, transcript variant X2	0	0	0	0	0	0	0	0	0	0	0	0	0	0	0	0
rna-XM_010731512.3	gene-LOC104919479	LOC104919479	uncharacterized LOC104919479, transcript variant X3	0	0	0	0	0	0.06	0	0	0.05	0	0.06	0	0	0.02	0.016667	0.02
rna-XM_010731513.3	gene-LOC104919479	LOC104919479	uncharacterized LOC104919479, transcript variant X4	0	0	0.07	0.06	0	0	0	0	0	0	0	0	0.023333	0.02	0	0
rna-XM_010731516.3	gene-LOC104919480	LOC104919480	teashirt homolog 1, transcript variant X3	0.74	1.27	0.92	1.14	1.2	1.4	0.73	1.28	1.4	1.5	1.14	0.96	0.976667	1.24667	1.13667	1.2
rna-XM_019254834.2	gene-LOC104919480	LOC104919480	teashirt homolog 1, transcript variant X1	0	0	0	0	0	0	0	0	0	0	0	0	0	0	0	0
rna-XM_019254836.2	gene-LOC104919480	LOC104919480	teashirt homolog 1, transcript variant X2	0.44	0	0.1	0.8	0.14	0.24	0.92	0.1	0.4	1.01	0.89	0.58	0.18	0.393333	0.473333	0.826667
rna-XM_019271427.2	gene-LOC104919481	LOC104919481	myosin heavy chain, fast skeletal muscle	0	0	0	0	0.01	0	0.01	0	0.01	0	0	0	0	0.003333	0.006667	0
rna-XM_010731521.3	gene-LOC104919484	LOC104919484	dual specificity mitogen-activated protein kinase kinase 4, transcript variant X1	0.98	1.26	0.91	0.64	0.33	0.49	0.8	0.53	1.03	0.74	0.56	0.3	1.05	0.486667	0.786667	0.533333
rna-XM_010731522.3	gene-LOC104919484	LOC104919484	dual specificity mitogen-activated protein kinase kinase 4, transcript variant X2	2.9	3.73	3.2	3.72	4.74	4.16	2.38	3.38	3.64	4.57	4.71	3.96	3.27667	4.20667	3.13333	4.41333
rna-XM_010731523.3	gene-LOC104919484	LOC104919484	dual specificity mitogen-activated protein kinase kinase 4, transcript variant X3	0.36	0.2	0.33	0.52	0.82	0.52	0.53	0.87	0.67	0.71	0.31	0.63	0.296667	0.62	0.69	0.55
rna-XM_010731524.3	gene-LOC104919485	LOC104919485	phosphoribosyl pyrophosphate synthase-associated protein 2, transcript variant X1	12.81	3.14	10.9	11.43	11.05	14.93	6.92	6.91	10.03	8.96	8.11	10.86	8.95	12.47	7.95333	9.31
rna-XM_027284910.1	gene-LOC104919485	LOC104919485	phosphoribosyl pyrophosphate synthase-associated protein 2, transcript variant X2	4.04	11.7	5.19	3.95	3.81	4.17	9.62	9.57	7.7	9.26	9.03	5.53	6.97667	3.97667	8.96333	7.94
rna-XM_019272863.2	gene-LOC104919487	LOC104919487	neurabin-2	28.99	22.61	23.39	21.94	26.84	24.36	25.28	27.18	27.48	26.01	26.37	24	24.9967	24.38	26.6467	25.46
rna-XM_010731526.3	gene-LOC104919488	LOC104919488	transmembrane protein 56-B	2.79	2.11	2.97	2.83	2.47	3.75	2.87	2.54	3.36	3.17	2.56	2.96	2.62333	3.01667	2.92333	2.89667
rna-XM_010731527.3	gene-LOC104919489	LOC104919489	phospholipid phosphatase-related protein type 5, transcript variant X7	0	0	0	0	0	0	0.02	0	0	0	0	0	0	0	0.006667	0
rna-XM_019273299.2	gene-LOC104919489	LOC104919489	phospholipid phosphatase-related protein type 5, transcript variant X1	0	0	0	0	0	0	0	0	0	0	0	0	0	0	0	0
rna-XM_019273305.2	gene-LOC104919489	LOC104919489	phospholipid phosphatase-related protein type 5, transcript variant X5	0	0	0	0	0	0	0	0	0	0	0	0	0	0	0	0
rna-XM_019273310.2	gene-LOC104919489	LOC104919489	phospholipid phosphatase-related protein type 5, transcript variant X6	0	0	0	0	0	0	0	0	0	0	0	0	0	0	0	0
rna-XM_019273320.2	gene-LOC104919489	LOC104919489	phospholipid phosphatase-related protein type 5, transcript variant X8	0	0	0	0	0	0	0	0	0	0	0	0	0	0	0	0
rna-XM_019273325.2	gene-LOC104919489	LOC104919489	phospholipid phosphatase-related protein type 5, transcript variant X9	0	0	0	0	0.04	0	0.02	0	0	0	0	0	0	0.013333	0.006667	0
rna-XM_027285355.1	gene-LOC104919489	LOC104919489	phospholipid phosphatase-related protein type 5, transcript variant X2	0	0	0	0	0	0	0	0	0	0	0	0	0	0	0	0
rna-XM_027285356.1	gene-LOC104919489	LOC104919489	phospholipid phosphatase-related protein type 5, transcript variant X3	0	0	0	0	0	0	0	0	0	0	0	0	0	0	0	0
rna-XM_027285357.1	gene-LOC104919489	LOC104919489	phospholipid phosphatase-related protein type 5, transcript variant X4	0	0	0	0	0	0	0	0.01	0	0	0	0	0	0	0.003333	0
rna-XM_010731531.3	gene-LOC104919493	LOC104919493	putative uncharacterized protein MYH16, transcript variant X1	0	0	0	0.19	0	0.45	0.38	0.23	0	0	0.2	0.17	0	0.213333	0.203333	0.123333
rna-XM_019271406.2	gene-LOC104919493	LOC104919493	putative uncharacterized protein MYH16, transcript variant X2	0	0	0	0	0	0	0	0	0	0	0	0	0	0	0	0
rna-XM_019271408.2	gene-LOC104919493	LOC104919493	putative uncharacterized protein MYH16, transcript variant X3	0.23	0.21	0.21	0	0.45	0.02	0	0.12	0.63	0.6	0.15	0.07	0.216667	0.156667	0.25	0.273333
rna-XM_010731536.3	gene-LOC104919498	LOC104919498	SUZ domain-containing protein 1	32.69	28.83	28.7	32.39	36.04	32.88	31.78	34.16	31.12	28.93	33.63	30.54	30.0733	33.77	32.3533	31.0333
rna-XM_010731539.3	gene-LOC104919501	LOC104919501	succinate dehydrogenase [ubiquinone] iron-sulfur subunit, mitochondrial	2.75	4.85	3.58	5.08	3.58	3.75	2.91	2.87	3.31	2.92	2.02	6.41	3.72667	4.13667	3.03	3.78333
rna-XM_010731546.3	gene-LOC104919507	LOC104919507	bromodomain and PHD finger-containing protein 3, transcript variant X1	6.59	4.9	4.15	4.97	5.76	5.27	6.42	7.31	6.02	4.56	5.66	6.36	5.21333	5.33333	6.58333	5.52667
rna-XM_019270966.2	gene-LOC104919507	LOC104919507	bromodomain and PHD finger-containing protein 3, transcript variant X2	0.32	0.96	1.18	1.61	1.11	1.58	0.34	0.4	0.67	1.61	1.16	0.48	0.82	1.43333	0.47	1.08333
rna-XM_019270967.2	gene-LOC104919507	LOC104919507	bromodomain and PHD finger-containing protein 3, transcript variant X3	1	0.72	0.69	0.45	0.4	0.51	0.35	0.19	0.14	1.01	0.53	0.54	0.803333	0.453333	0.226667	0.693333
rna-XM_010731548.3	gene-LOC104919508	LOC104919508	bile acid receptor, transcript variant X2	2.06	1.85	7.85	3.56	3.56	6.91	2.99	2.96	3.07	0	4.33	5.41	3.92	4.67667	3.00667	3.24667
rna-XM_010731550.3	gene-LOC104919508	LOC104919508	bile acid receptor, transcript variant X4	0	0	0	0	0	0	0	0	0	0	0.16	0.06	0	0	0	0.073333
rna-XM_019270968.2	gene-LOC104919508	LOC104919508	bile acid receptor, transcript variant X1	0	0	0	2.4	1.42	0	3.68	0	0	6.72	0	0	0	1.27333	1.22667	2.24
rna-XM_019270969.2	gene-LOC104919508	LOC104919508	bile acid receptor, transcript variant X3	5.24	1.84	0.62	0	0	0	1.82	3.45	3.84	0	0	0	2.56667	0	3.03667	0
rna-XM_027288379.1	gene-LOC104919508	LOC104919508	bile acid receptor, transcript variant X5	0.38	0.43	0.16	0.28	0.26	0.39	0.35	0.31	0.64	0.54	0.35	0.33	0.323333	0.31	0.433333	0.406667
rna-XM_010731552.3	gene-LOC104919509	LOC104919509	mitogen-activated protein kinase 13	11.71	10.85	10.74	11.11	8.38	8.76	8.68	10.61	14.95	9.68	9.34	9.89	11.1	9.41667	11.4133	9.63667
rna-XM_010731553.3	gene-LOC104919510	LOC104919510	protein FAM19A5	0	0.04	0	0	0	0.02	0	0.02	0	0	0	0	0.013333	0.006667	0.006667	0
rna-XM_019254817.2	gene-LOC104919513	LOC104919513	focal adhesion kinase 1, transcript variant X1	0	0	0	0	0	0	0	0	0	0	0	0	0	0	0	0
rna-XM_019254819.2	gene-LOC104919513	LOC104919513	focal adhesion kinase 1, transcript variant X2	0.06	0	0	0	0	0	0	0	0	0	0	0.26	0.02	0	0	0.086667
rna-XM_019254820.2	gene-LOC104919513	LOC104919513	focal adhesion kinase 1, transcript variant X3	0	0	0	0.1	0	0	0.05	0	0	0	0	0	0	0.033333	0.016667	0
rna-XM_019254821.2	gene-LOC104919513	LOC104919513	focal adhesion kinase 1, transcript variant X4	0	0.09	0.04	0	0.28	0.14	0	0.11	0	0.11	0.04	0	0.043333	0.14	0.036667	0.05
rna-XM_019254822.2	gene-LOC104919513	LOC104919513	focal adhesion kinase 1, transcript variant X5	0	0.06	0.09	0.05	0.15	0	0	0	0.2	0	0	0	0.05	0.066667	0.066667	0
rna-XM_019254823.2	gene-LOC104919513	LOC104919513	focal adhesion kinase 1, transcript variant X6	0	0	0	0	0	0	0	0	0	0	0	0	0	0	0	0
rna-XM_027287213.1	gene-LOC104919513	LOC104919513	focal adhesion kinase 1, transcript variant X7	1.49	1.65	2.16	1.59	0.68	0.54	1.52	1.18	2.37	1.03	1.49	0.9	1.76667	0.936667	1.69	1.14
rna-XM_027287214.1	gene-LOC104919513	LOC104919513	focal adhesion kinase 1, transcript variant X8	0	0	0	0	0	0	0	0	0	0	0	0	0	0	0	0
rna-XM_027287215.1	gene-LOC104919513	LOC104919513	focal adhesion kinase 1, transcript variant X9	0	0	0.39	0.17	0	0	0	0	0	0	0	0.15	0.13	0.056667	0	0.05
rna-XM_019270975.2	gene-LOC104919515	LOC104919515	tyrosine-protein phosphatase non-receptor type 11, transcript variant X4	6.25	4.78	4.97	3.51	1.74	4.55	2.67	6.09	4.17	3.7	5.18	3.82	5.33333	3.26667	4.31	4.23333
rna-XM_019270976.2	gene-LOC104919515	LOC104919515	tyrosine-protein phosphatase non-receptor type 11, transcript variant X5	4.49	5.46	5.02	3.91	4.45	4.73	7.51	1.49	5.66	4.01	2.64	5.1	4.99	4.36333	4.88667	3.91667
rna-XM_027288542.1	gene-LOC104919515	LOC104919515	tyrosine-protein phosphatase non-receptor type 11, transcript variant X1	0	0	0	0	0	0	0	0	0	0	0	0	0	0	0	0
rna-XM_027288543.1	gene-LOC104919515	LOC104919515	tyrosine-protein phosphatase non-receptor type 11, transcript variant X2	0	0	0	0	0	0	0	0	0	0	0	0	0	0	0	0
rna-XM_027288544.1	gene-LOC104919515	LOC104919515	tyrosine-protein phosphatase non-receptor type 11, transcript variant X3	1.66	1.02	0	1	1.75	1.43	0.8	0	1.44	1.75	0	0	0.893333	1.39333	0.746667	0.583333
rna-XM_010731563.3	gene-LOC104919517	LOC104919517	DENN domain-containing protein 2C, transcript variant X1	1.78	1.53	1.33	1.68	0.43	2.25	0.63	0.82	1.67	2.23	1.89	1.64	1.54667	1.45333	1.04	1.92
rna-XM_019270986.2	gene-LOC104919517	LOC104919517	DENN domain-containing protein 2C, transcript variant X3	9.1	11.64	8.33	8.37	9.55	16.35	9.68	10.71	9.14	12.07	9.13	9.97	9.69	11.4233	9.84333	10.39
rna-XM_027288643.1	gene-LOC104919517	LOC104919517	DENN domain-containing protein 2C, transcript variant X2	0	0.09	0	0.77	0.41	0.49	0	0.38	0.39	0.35	1.62	0	0.03	0.556667	0.256667	0.656667
rna-XM_010731567.3	gene-LOC104919519	LOC104919519	ras association domain-containing protein 8	0.02	0	0	0.02	0.02	0.04	0.04	0	0.04	0	0	0	0.006667	0.026667	0.026667	0
rna-XM_010731571.3	gene-LOC104919520	LOC104919520	solute carrier family 45 member 4	7.85	9.26	10.71	8.03	7.09	6.65	6.64	6.84	8.92	6.46	6.93	10.3	9.27333	7.25667	7.46667	7.89667
rna-XM_010731568.3	gene-LOC104919521	LOC104919521	microtubule-associated protein futsch	0.53	0.36	0.46	0.27	0.39	0.64	0.65	0.45	0.53	0.52	0.46	0.18	0.45	0.433333	0.543333	0.386667
rna-XM_027277717.1	gene-LOC104919523	LOC104919523	glutamate receptor ionotropic, delta-1-like, transcript variant X1	0	0	0	0	0	0	0	0	0	0	0	0	0	0	0	0
rna-XM_027277718.1	gene-LOC104919523	LOC104919523	glutamate receptor ionotropic, delta-1-like, transcript variant X2	0	0	0	0	0	0	0	0	0	0	0	0	0	0	0	0
rna-XM_027277719.1	gene-LOC104919523	LOC104919523	glutamate receptor ionotropic, delta-1-like, transcript variant X3	0	0	0	0.01	0.04	0.02	0.05	0.01	0.01	0.03	0	0	0	0.023333	0.023333	0.01
rna-XM_027277720.1	gene-LOC104919523	LOC104919523	glutamate receptor ionotropic, delta-1-like, transcript variant X4	0	0	0	0	0	0	0	0	0	0	0	0.03	0	0	0	0.01
rna-XM_027277721.1	gene-LOC104919523	LOC104919523	glutamate receptor ionotropic, delta-1-like, transcript variant X5	0.05	0	0	0	0	0	0	0	0	0	0	0.03	0.016667	0	0	0.01
rna-XM_010731574.3	gene-LOC104919526	LOC104919526	uncharacterized LOC104919526, transcript variant X1	0	0	0.13	0.06	0	0	0	0	0	0	0	0	0.043333	0.02	0	0
rna-XM_019269275.2	gene-LOC104919526	LOC104919526	uncharacterized LOC104919526, transcript variant X2	0	0	0	0	0	0	0	0	0	0	0.03	0	0	0	0	0.01
rna-XM_019269325.2	gene-LOC104919528	LOC104919528	extensin-2-like	0	0	0	0	0	0	0	0.07	0.71	0	0	0	0	0	0.26	0
rna-XM_010731576.3	gene-LOC104919529	LOC104919529	alpha-actinin-2, transcript variant X1	0	0	0	0	0	0.02	0	0	0	0	0	0	0	0.006667	0	0
rna-XM_027277415.1	gene-LOC104919529	LOC104919529	alpha-actinin-2, transcript variant X2	0	0	0.07	0	0	0	0	0	0	0	0.02	0.06	0.023333	0	0	0.026667
rna-XM_010731577.3	gene-LOC104919530	LOC104919530	muscarinic acetylcholine receptor M3, transcript variant X1	4.32	3.2	3.78	4.63	4.15	6.3	4.5	3.57	5.32	5.53	5.21	4.15	3.76667	5.02667	4.46333	4.96333
rna-XM_027278384.1	gene-LOC104919530	LOC104919530	muscarinic acetylcholine receptor M3, transcript variant X2	0	0.18	0	0	0.12	0	0.19	0	0	0	0	0	0.06	0.04	0.063333	0
rna-XM_027278385.1	gene-LOC104919530	LOC104919530	muscarinic acetylcholine receptor M3, transcript variant X3	0.72	0	0.11	0.77	0.34	0.45	1.03	0.61	0.66	0.84	0.35	0.1	0.276667	0.52	0.766667	0.43
rna-XM_010731581.3	gene-LOC104919534	LOC104919534	ubiquitin-conjugating enzyme E2 D2	43.55	38.18	43.71	34.6	48.76	40.96	50.16	51.68	42.27	44.03	48.4	38.38	41.8133	41.44	48.0367	43.6033
rna-XM_010731589.3	gene-LOC104919539	LOC104919539	serine-rich coiled-coil domain-containing protein 2, transcript variant X6	0	0	0	0	0	0	0	0	0	0.16	0	0	0	0	0	0.053333
rna-XM_019269301.2	gene-LOC104919539	LOC104919539	serine-rich coiled-coil domain-containing protein 2, transcript variant X1	0.33	0.37	0.17	0.37	0.23	0.38	0.59	0.63	0.39	0.26	0.21	0.1	0.29	0.326667	0.536667	0.19
rna-XM_019269302.2	gene-LOC104919539	LOC104919539	serine-rich coiled-coil domain-containing protein 2, transcript variant X4	0.15	0	0	0	0.29	0	0.16	0	0	0.13	0.3	0.35	0.05	0.096667	0.053333	0.26
rna-XM_019269303.2	gene-LOC104919539	LOC104919539	serine-rich coiled-coil domain-containing protein 2, transcript variant X2	0	0.42	0	0	0	0.04	0	0	0	0	0	0	0.14	0.013333	0	0
rna-XM_019269304.2	gene-LOC104919539	LOC104919539	serine-rich coiled-coil domain-containing protein 2, transcript variant X5	0	0	0	0	0	0	0	0	0	0	0	0	0	0	0	0
rna-XM_027277843.1	gene-LOC104919539	LOC104919539	serine-rich coiled-coil domain-containing protein 2, transcript variant X3	0	0	0	0	0	0	0	0	0	0	0	0.09	0	0	0	0.03
rna-XM_010731590.3	gene-LOC104919540	LOC104919540	protein NDNF	0	0	0	0	0	0	0	0	0	0	0	0.02	0	0	0	0.006667
rna-XM_027278532.1	gene-LOC104919543	LOC104919543	serine/threonine/tyrosine-interacting-like protein 1	0	0	0	0	0	0	0	0	0	0	0	0	0	0	0	0
rna-XM_027278254.1	gene-LOC104919544	LOC104919544	ryanodine receptor 2-like	0	0	0	0.01	0	0	0	0	0	0	0	0	0	0.003333	0	0
rna-XM_019269276.2	gene-LOC104919546	LOC104919546	formin-2	0.01	0.02	0.04	0	0.02	0.15	0.08	0.06	0.06	0.02	0.04	0.03	0.023333	0.056667	0.066667	0.03
rna-XM_019269300.2	gene-LOC104919547	LOC104919547	protein FAM13A	0.34	0.68	0.58	1.3	0.75	0.31	0.58	0.63	0.53	0.63	0.74	0.26	0.533333	0.786667	0.58	0.543333
rna-XM_019269291.2	gene-LOC104919548	LOC104919548	ankyrin-3, transcript variant X10	0	0	0	0.01	0.02	0.02	0	0.01	0.05	0	0.03	0.02	0	0.016667	0.02	0.016667
rna-XM_019269292.2	gene-LOC104919548	LOC104919548	ankyrin-3, transcript variant X11	0.04	0.03	0	0	0	0.02	0	0.01	0.02	0	0	0	0.023333	0.006667	0.01	0
rna-XM_027278235.1	gene-LOC104919548	LOC104919548	ankyrin-3, transcript variant X1	0.02	0	0.02	0	0.03	0	0.04	0.01	0.01	0	0.02	0	0.013333	0.01	0.02	0.006667
rna-XM_027278236.1	gene-LOC104919548	LOC104919548	ankyrin-3, transcript variant X2	0	0	0	0	0	0	0	0	0	0	0	0	0	0	0	0
rna-XM_027278237.1	gene-LOC104919548	LOC104919548	ankyrin-3, transcript variant X3	0	0	0	0	0	0	0	0	0	0	0	0	0	0	0	0
rna-XM_027278238.1	gene-LOC104919548	LOC104919548	ankyrin-3, transcript variant X4	0	0	0	0	0	0	0	0	0	0	0	0	0	0	0	0
rna-XM_027278239.1	gene-LOC104919548	LOC104919548	ankyrin-3, transcript variant X5	0	0.01	0.01	0.02	0.03	0.03	0	0	0	0	0	0	0.006667	0.026667	0	0
rna-XM_027278240.1	gene-LOC104919548	LOC104919548	ankyrin-3, transcript variant X6	0	0	0	0	0	0	0	0	0	0	0	0	0	0	0	0
rna-XM_027278241.1	gene-LOC104919548	LOC104919548	ankyrin-3, transcript variant X7	0	0	0	0	0	0	0	0	0	0.04	0	0	0	0	0	0.013333
rna-XM_027278242.1	gene-LOC104919548	LOC104919548	ankyrin-3, transcript variant X8	0	0	0	0	0	0	0	0	0	0	0	0	0	0	0	0
rna-XM_027278243.1	gene-LOC104919548	LOC104919548	ankyrin-3, transcript variant X9	0	0.03	0.02	0.04	0.03	0.02	0.02	0.01	0	0	0	0.01	0.016667	0.03	0.01	0.003333
rna-XM_010731599.3	gene-LOC104919550	LOC104919550	dachshund homolog 1, transcript variant X2	1.38	0.53	0.96	0.99	0.52	1.02	1.55	1.43	1.32	0.8	0.8	0.61	0.956667	0.843333	1.43333	0.736667
rna-XM_019265981.2	gene-LOC104919550	LOC104919550	dachshund homolog 1, transcript variant X1	0.19	0.52	0.46	0.97	0.75	1.3	0.76	0.93	0.52	0.99	1.52	0.48	0.39	1.00667	0.736667	0.996667
rna-XM_010731600.3	gene-LOC104919551	LOC104919551	peroxidasin homolog	551.74	680.45	659.1	528.63	610.9	566.88	558.55	502.9	542.67	559.88	545.24	577.69	630.43	568.803	534.707	560.937
rna-XM_010731605.3	gene-LOC104919553	LOC104919553	TBC1 domain family member 20, transcript variant X1	1.98	2.08	2.46	2.05	2.02	1.8	2.07	2.18	3.15	2.26	2.86	2.27	2.17333	1.95667	2.46667	2.46333
rna-XR_002041620.2	gene-LOC104919553	LOC104919553	TBC1 domain family member 20, transcript variant X2	0	0	0	0.24	0	0.03	0	0	0	0	0	0	0	0.09	0	0
rna-XM_010731603.3	gene-LOC104919555	LOC104919555	cbp/p300-interacting transactivator 3	10.63	9.96	8.88	10.77	8.12	14.05	11.5	10.46	11.47	12.39	10.06	12.21	9.82333	10.98	11.1433	11.5533
rna-XM_019267193.2	gene-LOC104919560	LOC104919560	uncharacterized LOC104919560	6.46	4.62	5.95	8.18	4.49	6.04	6.22	5.2	7.26	8.58	7.09	5.86	5.67667	6.23667	6.22667	7.17667
rna-XM_010731615.3	gene-LOC104919563	LOC104919563	kelch-like protein 10	0	0	0	0	0	0	0.07	0	0	0	0.1	0	0	0	0.023333	0.033333
rna-XM_010731614.3	gene-LOC104919566	LOC104919566	protein lin-28 homolog A, transcript variant X1	0	0.01	0	0	0	0.08	0	0	0	0	0	0	0.003333	0.026667	0	0
rna-XM_010731616.3	gene-LOC104919566	LOC104919566	protein lin-28 homolog A, transcript variant X2	0.04	0	0.05	0.08	0.09	0	0.06	0.08	0.05	0.01	0.05	0.06	0.03	0.056667	0.063333	0.04
rna-XM_027286148.1	gene-LOC104919571	LOC104919571	transcriptional repressor scratch 1	0	0	0	0	0	0	0	0	0.01	0	0	0	0	0	0.003333	0
rna-XM_010731624.3	gene-LOC104919572	LOC104919572	ribonuclease ZC3H12A	11.52	13.63	14.79	14.23	20.14	16.17	13.44	12.76	12.59	15.97	17.95	16.3	13.3133	16.8467	12.93	16.74
rna-XM_010731628.3	gene-LOC104919574	LOC104919574	cornifelin	197.42	243.23	236.89	302.13	330.94	289.29	223.04	247.5	241.68	271.45	386.26	267.24	225.847	307.453	237.407	308.317
rna-XM_019269305.2	gene-LOC104919579	LOC104919579	syntaphilin, transcript variant X1	0	0	0	0	0	0	0	0	0	0	0	0	0	0	0	0
rna-XM_019269314.2	gene-LOC104919579	LOC104919579	syntaphilin, transcript variant X2	0	0	0	0	0	0	0	0	0	0	0	0	0	0	0	0
rna-XM_019269321.2	gene-LOC104919579	LOC104919579	syntaphilin, transcript variant X3	0.04	0.03	0.03	0.02	0.03	0.06	0.04	0.02	0.01	0.02	0.03	0.01	0.033333	0.036667	0.023333	0.02
rna-XM_010731637.3	gene-LOC104919580	LOC104919580	thyroid hormone receptor-associated protein 3, transcript variant X2	16.09	8.08	11.38	9.38	8.1	10.39	17.5	11.41	10.42	10.71	9.65	5.33	11.85	9.29	13.11	8.56333
rna-XM_010731638.3	gene-LOC104919580	LOC104919580	thyroid hormone receptor-associated protein 3, transcript variant X1	22.79	20.16	17.85	13.21	15.31	13.64	19.24	22.24	28.15	21.2	11.87	25.56	20.2667	14.0533	23.21	19.5433
rna-XM_010731639.3	gene-LOC104919580	LOC104919580	thyroid hormone receptor-associated protein 3, transcript variant X3	1.96	2.58	4.14	2.39	1.44	2.32	1.95	0	0	2.57	2.39	0.53	2.89333	2.05	0.65	1.83
rna-XM_019267153.2	gene-LOC104919591	LOC104919591	CTP synthase 1	6.36	5.17	5.53	5.28	4.43	5.62	5.7	5.24	5.66	5.46	6	5.71	5.68667	5.11	5.53333	5.72333
rna-XM_010731652.3	gene-LOC104919592	LOC104919592	forkhead box protein O3	0	0.01	0.01	0.05	0	0.04	0.02	0	0.02	0	0	0.02	0.006667	0.03	0.013333	0.006667
rna-XM_019267166.2	gene-LOC104919594	LOC104919594	mucin-5AC	0	0	0	0	0	0	0	0	0	0.05	0	0	0	0	0	0.016667
rna-XM_010731655.3	gene-LOC104919595	LOC104919595	centrosome-associated protein 350	0	0	0	0	0	0	0	0	0	0	0	0	0	0	0	0
rna-XM_010731657.3	gene-LOC104919597	LOC104919597	uncharacterized LOC104919597	0	0	0	0	0	0	0	0	0.11	0	0	0	0	0	0.036667	0
rna-XM_019267149.2	gene-LOC104919600	LOC104919600	mitogen-activated protein kinase kinase kinase 5	0.66	0.86	0.63	1.34	1.05	1.01	1.04	1.43	0.7	1.2	1.66	1.38	0.716667	1.13333	1.05667	1.41333
rna-XM_019262884.2	gene-LOC104919608	LOC104919608	fibronectin	27.5	42.07	28.14	55.25	69.31	52.47	40.28	43.71	37.33	69.58	67.12	50.79	32.57	59.01	40.44	62.4967
rna-XM_019254844.2	gene-LOC104919610	LOC104919610	DENN domain-containing protein 3, transcript variant X5	0	0	0.24	2.17	2.76	2.42	0.59	0.2	0.81	0.2	1.88	1.14	0.08	2.45	0.533333	1.07333
rna-XM_019254845.2	gene-LOC104919610	LOC104919610	DENN domain-containing protein 3, transcript variant X4	1.93	0	3.76	1.7	0	0.56	2.24	2.04	4.92	5.92	2.77	3.16	1.89667	0.753333	3.06667	3.95
rna-XM_019254846.2	gene-LOC104919610	LOC104919610	DENN domain-containing protein 3, transcript variant X6	0	0.12	0.14	0.18	0.09	0	0.12	0.12	0.1	0	0.52	0.09	0.086667	0.09	0.113333	0.203333
rna-XM_027287211.1	gene-LOC104919610	LOC104919610	DENN domain-containing protein 3, transcript variant X1	0	0	0	0	0	0	0	0	0	0	0	0.39	0	0	0	0.13
rna-XM_027287212.1	gene-LOC104919610	LOC104919610	DENN domain-containing protein 3, transcript variant X3	0	0	0	0.12	0.11	0	0.2	0.34	0	0.27	0.2	0.23	0	0.076667	0.18	0.233333
rna-XR_003463637.1	gene-LOC104919610	LOC104919610	DENN domain-containing protein 3, transcript variant X2	0	0	0.11	0	0	0	0	0	0.07	0	0.36	0.23	0.036667	0	0.023333	0.196667
rna-XM_027291079.1	gene-LOC104919611	LOC104919611	motor neuron and pancreas homeobox protein 1	0	0	0	0	0	0	0	0	0	0	0	0.03	0	0	0	0.01
rna-XM_010731675.3	gene-LOC104919615	LOC104919615	troponin C, slow skeletal and cardiac muscles	0	0.04	0.12	0.22	0.11	0.07	0.04	0.08	0.14	0	0	0.03	0.053333	0.133333	0.086667	0.01
rna-XM_010731676.3	gene-LOC104919616	LOC104919616	dual specificity protein phosphatase 7	27.88	29.36	29.97	33.49	37.09	31.9	33.87	30.97	31.25	36.42	39.78	33.63	29.07	34.16	32.03	36.61
rna-XM_027277255.1	gene-LOC104919617	LOC104919617	bone morphogenetic protein 7, transcript variant X1	1.78	1.06	1.78	0.35	0.95	1.51	1.37	1.63	2.01	2.71	1.31	1.14	1.54	0.936667	1.67	1.72
rna-XM_027277256.1	gene-LOC104919617	LOC104919617	bone morphogenetic protein 7, transcript variant X2	0	0	0	0	0	0	0	0	0	0	0	0.38	0	0	0	0.126667
rna-XM_010731678.3	gene-LOC104919618	LOC104919618	interferon regulatory factor 4	25.14	31.6	37.38	22.63	39.69	29.21	25.13	34.59	21.49	23.57	28.34	28.22	31.3733	30.51	27.07	26.71
rna-XM_010731679.3	gene-LOC104919619	LOC104919619	ataxin-1-like, transcript variant X1	10.74	10.91	13.63	13.6	14.69	11.78	9.7	9.58	7.76	8.62	10.72	17.15	11.76	13.3567	9.01333	12.1633
rna-XM_019271316.2	gene-LOC104919619	LOC104919619	ataxin-1-like, transcript variant X2	1.97	3.05	2.03	1.9	2.48	1.5	2.11	2	2.05	1.61	1.79	1.15	2.35	1.96	2.05333	1.51667
rna-XM_027277254.1	gene-LOC104919619	LOC104919619	ataxin-1-like, transcript variant X3	1.23	0.9	1.08	1.39	0.56	0.36	0.97	1.22	0.71	0.7	0.58	1.81	1.07	0.77	0.966667	1.03
rna-XM_010731681.3	gene-LOC104919620	LOC104919620	dysbindin, transcript variant X2	0	0	0.03	0	0	0.08	0	0	0	0	0	0	0.01	0.026667	0	0
rna-XM_027277293.1	gene-LOC104919620	LOC104919620	dysbindin, transcript variant X1	0	0.04	0	0	0	0	0	0	0.03	0	0	0.03	0.013333	0	0.01	0.01
rna-XM_010731684.2	gene-LOC104919621	LOC104919621	G-protein coupled receptor 20	0	0	0	0	0.06	0	0	0	0	0	0	0	0	0.02	0	0
rna-XM_027277291.1	gene-LOC104919624	LOC104919624	cadherin-1, transcript variant X1	0.03	0	0	0	0	0	0	0	0	0	0	0	0.01	0	0	0
rna-XM_027277292.1	gene-LOC104919624	LOC104919624	cadherin-1, transcript variant X2	0	0.03	0.03	0	0.04	0	0	0	0	0	0	0	0.02	0.013333	0	0
rna-XM_019271353.2	gene-LOC104919629	LOC104919629	cadherin-4, transcript variant X1	0	1.04	0.65	0.41	0.55	1.13	0	0	0.59	0.49	0.19	1.13	0.563333	0.696667	0.196667	0.603333
rna-XM_019271354.2	gene-LOC104919629	LOC104919629	cadherin-4, transcript variant X2	2.6	0.44	0.79	1.06	0.57	1.14	1.28	1.02	1.03	0.49	0.8	0.43	1.27667	0.923333	1.11	0.573333
rna-XM_010731691.3	gene-LOC104919630	LOC104919630	opioid growth factor receptor-like protein 1	9.18	10.48	10.91	9	10.11	9.48	9.66	11.35	8.98	9.79	10.46	10.79	10.19	9.53	9.99667	10.3467
rna-XM_010731698.3	gene-LOC104919634	LOC104919634	protein kinase C-binding protein 1-like, transcript variant X4	0	0	1.12	0.1	1.85	1.55	0	0	0	0	0.66	1.88	0.373333	1.16667	0	0.846667
rna-XM_019276087.2	gene-LOC104919634	LOC104919634	protein kinase C-binding protein 1-like, transcript variant X1	0	0	0	0	1.29	0	0	0	0	0	0	0	0	0.43	0	0
rna-XM_019276088.2	gene-LOC104919634	LOC104919634	protein kinase C-binding protein 1-like, transcript variant X2	2.85	0	3.11	1.71	2.46	3.32	3.03	1.27	3.08	0.58	0.76	2.52	1.98667	2.49667	2.46	1.28667
rna-XM_019276089.2	gene-LOC104919634	LOC104919634	protein kinase C-binding protein 1-like, transcript variant X3	0.94	0.25	0.65	0.68	1.27	0.27	0	0	0.29	0	1.32	0.47	0.613333	0.74	0.096667	0.596667
rna-XM_019276092.2	gene-LOC104919634	LOC104919634	protein kinase C-binding protein 1-like, transcript variant X5	8.43	10.69	6.77	9.71	6.4	6.02	3.99	8.51	6.14	8.07	8	6.45	8.63	7.37667	6.21333	7.50667
rna-XM_019276093.2	gene-LOC104919634	LOC104919634	protein kinase C-binding protein 1-like, transcript variant X7	1.74	1.36	1.25	1.09	0.59	1.47	1.43	1.34	2.31	2.38	0.73	0.68	1.45	1.05	1.69333	1.26333
rna-XM_019276094.2	gene-LOC104919634	LOC104919634	protein kinase C-binding protein 1-like, transcript variant X6	0.81	0.5	0.32	0.43	0.31	0.38	0.31	0.49	0.36	0.85	0.32	0.61	0.543333	0.373333	0.386667	0.593333
rna-XM_010731699.3	gene-LOC104919635	LOC104919635	translocating chain-associated membrane protein 1-like 1, transcript variant X1	0.62	1.14	1.55	0.62	0.65	0.85	1.04	1.08	1.19	0.59	0.61	0.87	1.10333	0.706667	1.10333	0.69
rna-XM_019276047.2	gene-LOC104919635	LOC104919635	translocating chain-associated membrane protein 1-like 1, transcript variant X2	0.55	0.06	0.11	0.08	0	0.12	0.12	0.14	0.1	0.18	0.15	0.2	0.24	0.066667	0.12	0.176667
rna-XM_027277209.1	gene-LOC104919635	LOC104919635	translocating chain-associated membrane protein 1-like 1, transcript variant X3	0.57	1.33	1	1.78	0.25	0.63	0.83	1.71	0	0	2.24	0.07	0.966667	0.886667	0.846667	0.77
rna-XM_027277210.1	gene-LOC104919635	LOC104919635	translocating chain-associated membrane protein 1-like 1, transcript variant X4	1.19	0	0	0.76	2.16	1.53	1.32	0.64	1.56	1.8	0	1.82	0.396667	1.48333	1.17333	1.20667
rna-XM_010731700.3	gene-LOC104919636	LOC104919636	RNA-binding protein 38	1.13	0	0.62	0.19	0	0	0.3	0.37	0.18	0.24	0	0	0.583333	0.063333	0.283333	0.08
rna-XM_010731701.3	gene-LOC104919637	LOC104919637	lens fiber major intrinsic protein	0	0	0	0	0.02	0	0	0	0	0	0	0.05	0	0.006667	0	0.016667
rna-XM_010731705.3	gene-LOC104919641	LOC104919641	rho-related GTP-binding protein Rho6	2.83	2.78	2.64	3.84	7.82	5.21	3.37	3.46	2.96	2.96	5.7	5.09	2.75	5.62333	3.26333	4.58333
rna-XM_019278910.2	gene-LOC104919643	LOC104919643	immunoglobulin superfamily DCC subclass member 4, transcript variant X1	0	0	0	0	0	0	0	0	0.02	0	0	0	0	0	0.006667	0
rna-XM_019278911.2	gene-LOC104919643	LOC104919643	immunoglobulin superfamily DCC subclass member 4, transcript variant X2	0.01	0.02	0.03	0.01	0.02	0.02	0.04	0.02	0	0.01	0.01	0.02	0.02	0.016667	0.02	0.013333
rna-XM_010731709.3	gene-LOC104919646	LOC104919646	polypeptide N-acetylgalactosaminyltransferase 6	0.04	0	0.03	0.19	0	0.06	0	0	0.06	0.07	0	0	0.023333	0.083333	0.02	0.023333
rna-XM_010731710.3	gene-LOC104919647	LOC104919647	glucose-6-phosphate 1-dehydrogenase, transcript variant X1	1.92	1.41	0.61	1.81	0.74	0.37	0.99	0.9	0	1.22	1.02	1.95	1.31333	0.973333	0.63	1.39667
rna-XM_010731711.3	gene-LOC104919647	LOC104919647	glucose-6-phosphate 1-dehydrogenase, transcript variant X2	25.84	24.11	22.89	25.11	28.92	23.83	23.39	22.97	26.84	28.84	30.02	25.73	24.28	25.9533	24.4	28.1967
rna-XM_019276102.2	gene-LOC104919647	LOC104919647	glucose-6-phosphate 1-dehydrogenase, transcript variant X3	1.18	1.27	0.69	0.8	0.37	1.69	0.43	0.86	0.58	0.67	0.54	0.88	1.04667	0.953333	0.623333	0.696667
rna-XM_010731712.3	gene-LOC104919648	LOC104919648	glycerol-3-phosphate dehydrogenase [NAD(+)], cytoplasmic	10.1	17.66	14.85	16.63	7.25	13.74	12.93	9.43	13.8	8.88	5.67	21.59	14.2033	12.54	12.0533	12.0467
rna-XM_010731713.3	gene-LOC104919649	LOC104919649	acid-sensing ion channel 1	0.05	0.31	0.09	0.3	0.02	0.26	0.1	0.26	0.16	0.25	0.06	0.15	0.15	0.193333	0.173333	0.153333
rna-XM_019276109.2	gene-LOC104919651	LOC104919651	glutaminase kidney isoform, mitochondrial, transcript variant X2	0	0	0.04	0.02	0	0	0	0	0	0	0.02	0	0.013333	0.006667	0	0.006667
rna-XM_027277270.1	gene-LOC104919651	LOC104919651	glutaminase kidney isoform, mitochondrial, transcript variant X1	0	0	0	0	0	0	0	0	0	0	0	0	0	0	0	0
rna-XM_010731716.3	gene-LOC104919652	LOC104919652	collagen alpha-1(II) chain, transcript variant X1	0	0	0	0	0	0	0.02	0	0	0	0	0	0	0	0.006667	0
rna-XM_010731717.3	gene-LOC104919652	LOC104919652	collagen alpha-1(II) chain, transcript variant X3	0	0	0	0	0	0	0	0	0	0	0	0	0	0	0	0
rna-XM_027277266.1	gene-LOC104919652	LOC104919652	collagen alpha-1(II) chain, transcript variant X2	0	0	0	0	0	0	0	0	0	0	0	0	0	0	0	0
rna-XM_027277267.1	gene-LOC104919652	LOC104919652	collagen alpha-1(II) chain, transcript variant X4	0	0	0	0	0	0	0	0	0	0	0	0	0	0	0	0
rna-XM_027277268.1	gene-LOC104919652	LOC104919652	collagen alpha-1(II) chain, transcript variant X5	0	0	0	0	0	0	0.02	0	0	0	0.01	0	0	0	0.006667	0.003333
rna-XM_027277269.1	gene-LOC104919652	LOC104919652	collagen alpha-1(II) chain, transcript variant X6	0	0	0	0	0	0	0	0	0	0	0	0	0	0	0	0
rna-XM_010731718.3	gene-LOC104919653	LOC104919653	5-aminolevulinate synthase, nonspecific, mitochondrial, transcript variant X2	0	0	0	0	0	0	0	0	0	0.03	0.07	0.03	0	0	0	0.043333
rna-XM_019271274.2	gene-LOC104919653	LOC104919653	5-aminolevulinate synthase, nonspecific, mitochondrial, transcript variant X1	0	0	0	0	0.07	0	0.02	0	0	0	0	0	0	0.023333	0.006667	0
rna-XM_019271275.2	gene-LOC104919653	LOC104919653	5-aminolevulinate synthase, nonspecific, mitochondrial, transcript variant X3	0	0	0	0	0	0	0	0	0	0	0	0	0	0	0	0
rna-XM_010731722.3	gene-LOC104919657	LOC104919657	potassium channel subfamily K member 15	0	0	0	0.02	0.05	0	0	0	0	0.03	0	0	0	0.023333	0	0.01
rna-XM_019276077.2	gene-LOC104919658	LOC104919658	uncharacterized LOC104919658, transcript variant X1	7.97	6.56	8.14	4.49	7.93	5.95	8.69	6.74	6.53	4.03	6.02	6.39	7.55667	6.12333	7.32	5.48
rna-XM_019276078.2	gene-LOC104919658	LOC104919658	uncharacterized LOC104919658, transcript variant X4	0	0.53	0.72	0.45	0	0	0	0.86	0.69	1.03	0	1.03	0.416667	0.15	0.516667	0.686667
rna-XM_019276079.2	gene-LOC104919658	LOC104919658	uncharacterized LOC104919658, transcript variant X3	0.84	0	0.55	0.42	0	0.65	0.45	0.29	0.4	0.73	0	0.22	0.463333	0.356667	0.38	0.316667
rna-XM_019276081.2	gene-LOC104919658	LOC104919658	uncharacterized LOC104919658, transcript variant X5	1.19	1.5	1.27	1.61	1.45	1.03	0	2.35	3.59	2.41	2.86	2.22	1.32	1.36333	1.98	2.49667
rna-XM_027277275.1	gene-LOC104919658	LOC104919658	uncharacterized LOC104919658, transcript variant X2	0.49	0.35	0.27	0.96	0.52	0.56	0	0.42	0.12	0.59	0.38	0.41	0.37	0.68	0.18	0.46
rna-XM_010731724.3	gene-LOC104919659	LOC104919659	nuclear receptor coactivator 3	11.6	10.21	9.52	8.86	8.5	11.18	10.08	10.65	11.58	11.3	9.44	8.62	10.4433	9.51333	10.77	9.78667
rna-XM_019276070.2	gene-LOC104919660	LOC104919660	aquaporin AQPAe.a, transcript variant X1	0	0	0	0	0	0	0	0	0	0	0	0	0	0	0	0
rna-XM_019276071.2	gene-LOC104919660	LOC104919660	aquaporin AQPAe.a, transcript variant X2	0	0	0	0	0	0	0	0	0	0	0	0	0	0	0	0
rna-XM_027277294.1	gene-LOC104919660	LOC104919660	aquaporin AQPAe.a, transcript variant X3	0	0	0	0	0	0	0	0	0	0	0	0	0	0	0	0
rna-XM_027288017.1	gene-LOC104919667	LOC104919667	serine/threonine-protein phosphatase PP1-beta catalytic subunit	86.97	73.9	74.21	90.24	88.16	112.39	83.59	85.36	92.99	86.96	88.91	74.38	78.36	96.93	87.3133	83.4167
rna-XM_010731733.3	gene-LOC104919668	LOC104919668	equilibrative nucleoside transporter 2, transcript variant X2	12.72	14.03	12.14	9.68	14.87	12.09	14.28	12.73	16.79	14.43	11.54	11.39	12.9633	12.2133	14.6	12.4533
rna-XM_027288007.1	gene-LOC104919668	LOC104919668	equilibrative nucleoside transporter 2, transcript variant X1	0.17	0	0	0.08	0.24	0	0	0.16	0.08	0.36	0.07	0.22	0.056667	0.106667	0.08	0.216667
rna-XM_027288008.1	gene-LOC104919668	LOC104919668	equilibrative nucleoside transporter 2, transcript variant X3	0.81	1.11	0.57	0.77	0.48	0.54	0.34	0.95	0.66	0.3	1.19	0.48	0.83	0.596667	0.65	0.656667
rna-XM_027287676.1	gene-LOC104919670	LOC104919670	uncharacterized LOC104919670	39.65	45.97	44.67	45.74	47.96	47.07	47.02	45.99	51.6	58.57	44.83	49.7	43.43	46.9233	48.2033	51.0333
rna-XM_010731737.3	gene-LOC104919671	LOC104919671	protein S100-P	0.38	0.68	0	0	0.98	1.88	0.66	0.35	1.25	0.35	0.71	0.95	0.353333	0.953333	0.753333	0.67
rna-XM_010731738.3	gene-LOC104919672	LOC104919672	protein S100-P	0	0.3	0.31	0	0	0	0	0	0	0	0	0.28	0.203333	0	0	0.093333
rna-XM_027287531.1	gene-LOC104919675	LOC104919675	uncharacterized LOC104919675	1.51	5.77	3.11	5.31	4.84	3.05	4.6	5.49	11.15	7.29	3.69	5.91	3.46333	4.4	7.08	5.63
rna-XM_010731744.3	gene-LOC104919678	LOC104919678	toll-like receptor 13, transcript variant X3	2.9	0	3.01	0	0	2.44	4.08	6.25	0.76	6.03	7.38	0	1.97	0.813333	3.69667	4.47
rna-XM_019271098.2	gene-LOC104919678	LOC104919678	toll-like receptor 13, transcript variant X2	4.25	9.07	4.39	6.76	4.95	10.37	4.04	3.47	6.57	2.72	0.7	4.26	5.90333	7.36	4.69333	2.56
rna-XM_027289081.1	gene-LOC104919678	LOC104919678	toll-like receptor 13, transcript variant X1	0.3	0.29	0.31	0.23	0.12	0.95	0	0.33	0.7	0.87	0.25	0.06	0.3	0.433333	0.343333	0.393333
rna-XM_019271112.2	gene-LOC104919679	LOC104919679	STIP1 homology and U box-containing protein 1, transcript variant X1	11.06	11.99	12.45	11.17	11.54	10.79	11.6	11.05	12.64	11.77	11.21	12.49	11.8333	11.1667	11.7633	11.8233
rna-XM_027289596.1	gene-LOC104919679	LOC104919679	STIP1 homology and U box-containing protein 1, transcript variant X2	0.62	0.49	0	0	0.16	0.29	0.55	0.17	0	0	0	0	0.37	0.15	0.24	0
rna-XM_010731756.3	gene-LOC104919687	LOC104919687	serine/threonine-protein kinase SBK1	0	0	0	0	0	0.01	0.02	0	0	0	0	0.02	0	0.003333	0.006667	0.006667
rna-XM_010731761.3	gene-LOC104919691	LOC104919691	histone H1.0-B	138.8	147.32	132.61	152.49	137.87	113.69	135.94	128.88	140.32	146.62	143.51	141.66	139.577	134.683	135.047	143.93
rna-XM_010731763.3	gene-LOC104919693	LOC104919693	hypothetical protein, transcript variant X2	12.3	14.66	12.26	15.04	10.63	13.97	15.4	10.64	10.3	10.86	9.05	13.04	13.0733	13.2133	12.1133	10.9833
rna-XM_019272774.2	gene-LOC104919693	LOC104919693	hypothetical protein, transcript variant X1	2.17	0	1.39	0.43	2.44	1.02	0.84	0	1.02	1.38	1.47	0.72	1.18667	1.29667	0.62	1.19
rna-XM_027289317.1	gene-LOC104919693	LOC104919693	hypothetical protein, transcript variant X3	0	0	1.03	0	0	0	0.68	0	0	0	0.7	0.73	0.343333	0	0.226667	0.476667
rna-XM_019271090.2	gene-LOC104919697	LOC104919697	actin-binding LIM protein 1, transcript variant X1	0	0	0	0	0	0	0	0	0	0	0	0	0	0	0	0
rna-XM_019271091.2	gene-LOC104919697	LOC104919697	actin-binding LIM protein 1, transcript variant X2	0	0	0	0	0	0	0	0	0	0	0	0	0	0	0	0
rna-XM_019271092.2	gene-LOC104919697	LOC104919697	actin-binding LIM protein 1, transcript variant X3	0	0	0	0	0	0	0	0	0	0	0	0	0	0	0	0
rna-XM_019271093.2	gene-LOC104919697	LOC104919697	actin-binding LIM protein 1, transcript variant X4	0	0	0	0	0	0	0	0	0	0	0	0	0	0	0	0
rna-XM_019271095.2	gene-LOC104919697	LOC104919697	actin-binding LIM protein 1, transcript variant X5	1.85	0.41	1.42	0.65	0	0	0.3	0.85	0.46	0.41	0.56	0.64	1.22667	0.216667	0.536667	0.536667
rna-XM_019271096.2	gene-LOC104919697	LOC104919697	actin-binding LIM protein 1, transcript variant X6	0	0.42	0.38	0	0.88	0.52	0.41	0.18	0	0.37	0	0.5	0.266667	0.466667	0.196667	0.29
rna-XM_019271101.2	gene-LOC104919699	LOC104919699	pentraxin fusion protein	2.83	5.39	1.42	1.84	2.64	4.74	3.04	3.2	5.14	3.97	3.03	1.46	3.21333	3.07333	3.79333	2.82
rna-XM_010731771.3	gene-LOC104919701	LOC104919701	uncharacterized LOC104919701	1.55	9.33	20.09	8.97	21.53	13.63	9.32	8.82	12.76	6.37	5.03	21.74	10.3233	14.71	10.3	11.0467
rna-XM_010731772.3	gene-LOC104919702	LOC104919702	glucagon receptor-like	0	0	0	0	0	0	0	0	0	0	0	0	0	0	0	0
rna-XM_027274270.1	gene-LOC104919703	LOC104919703	integrin beta-1-like	0.04	0.03	0.13	0.14	0.03	0.06	0.08	0.02	0.14	0.05	0.05	0.07	0.066667	0.076667	0.08	0.056667
rna-XM_019279382.2	gene-LOC104919704	LOC104919704	serine/threonine-protein kinase H1	0	0	0	0	0	0	0	0	0.03	0	0	0	0	0	0.01	0
rna-XM_010731776.3	gene-LOC104919706	LOC104919706	uncharacterized LOC104919706, transcript variant X1	0	0.07	0.05	0.17	0.12	0.1	0.07	0	0.1	0.05	0.07	0.05	0.04	0.13	0.056667	0.056667
rna-XM_027284051.1	gene-LOC104919706	LOC104919706	uncharacterized LOC104919706, transcript variant X2	0	0	0	0	0	0.03	0.01	0.1	0	0	0	0	0	0.01	0.036667	0
rna-XM_019268956.2	gene-LOC104919708	LOC104919708	plastin-3	4.42	4.96	4.89	6.28	5.93	5.78	4.92	5.24	6.03	5.59	5.57	5.16	4.75667	5.99667	5.39667	5.44
rna-XM_027273235.1	gene-LOC104919710	LOC104919710	potassium channel subfamily K member 13	0.02	0	0	0.07	0.02	0.05	0.02	0.05	0.05	0.03	0.1	0	0.006667	0.046667	0.04	0.043333
rna-XM_010731780.3	gene-LOC104919711	LOC104919711	protein phosphatase 1B-like	0.07	0.07	0.07	0.1	0.16	0.13	0.17	0.04	0.03	0.14	0.07	0.06	0.07	0.13	0.08	0.09
rna-XM_010731781.3	gene-LOC104919712	LOC104919712	reticulon-2	0	0	0	0	0	0	0	0	0	0	0.02	0	0	0	0	0.006667
rna-XM_010731794.3	gene-LOC104919714	LOC104919714	homeobox-containing protein 1, transcript variant X3	2.65	1.82	0.91	1.49	1.86	1.92	1.72	1.18	2.2	2.33	1	1.76	1.79333	1.75667	1.7	1.69667
rna-XM_019258381.2	gene-LOC104919714	LOC104919714	homeobox-containing protein 1, transcript variant X1	0.56	0.45	0.85	0.32	0.26	0.52	0.15	0.66	0.81	0.15	0.81	0.25	0.62	0.366667	0.54	0.403333
rna-XM_019258382.2	gene-LOC104919714	LOC104919714	homeobox-containing protein 1, transcript variant X2	0	0	0	0	0	0	0	0	0.26	0	0	0	0	0	0.086667	0
rna-XM_019258383.2	gene-LOC104919714	LOC104919714	homeobox-containing protein 1, transcript variant X4	0.38	0.61	0.73	0.84	1.11	0.89	1.23	1.54	0	0.48	1.19	0.77	0.573333	0.946667	0.923333	0.813333
rna-XM_010731783.3	gene-LOC104919715	LOC104919715	mitochondrial uncoupling protein 2	0	0.07	0	0	0	0.03	0	0	0	0	0	0	0.023333	0.01	0	0
rna-XM_019276465.2	gene-LOC104919716	LOC104919716	mitochondrial uncoupling protein 2	0	0	0.11	0.07	0.07	0.07	0.07	0.15	0.1	0.04	0.04	0.03	0.036667	0.07	0.106667	0.036667
rna-XM_010731787.3	gene-LOC104919718	LOC104919718	ras-related protein Rab-6A, transcript variant X2	1.97	2.19	1.53	3.61	1.97	2.27	1.95	1.68	1.62	1.72	2.12	2.79	1.89667	2.61667	1.75	2.21
rna-XM_019276480.2	gene-LOC104919718	LOC104919718	ras-related protein Rab-6A, transcript variant X1	12.9	12.15	12.47	16.25	18.32	15.55	12.13	12.82	14.52	16.99	16.5	15.72	12.5067	16.7067	13.1567	16.4033
rna-XM_010731788.3	gene-LOC104919719	LOC104919719	gap junction delta-2 protein, transcript variant X2	0	0	0.02	0.01	0	0	0	0	0.01	0	0.02	0	0.006667	0.003333	0.003333	0.006667
rna-XM_019276456.2	gene-LOC104919719	LOC104919719	gap junction delta-2 protein, transcript variant X1	0	0	0	0	0	0	0	0	0	0	0	0.01	0	0	0	0.003333
rna-XM_010731789.3	gene-LOC104919720	LOC104919720	transgelin	232.45	251.75	200.96	254.73	270.18	255.32	243.14	255.6	276.42	270.54	295.43	236.58	228.387	260.077	258.387	267.517
rna-XM_010731790.3	gene-LOC104919721	LOC104919721	platelet-activating factor acetylhydrolase IB subunit beta	7.14	7.72	8.85	5.87	6.57	6.95	8.25	8.3	9.53	8.27	8.51	8.8	7.90333	6.46333	8.69333	8.52667
rna-XM_019276459.2	gene-LOC104919722	LOC104919722	myelin protein zero-like protein 2, transcript variant X1	0.29	0	1.63	3.13	1.42	0	1.45	0.19	1.66	1.66	0.8	0.68	0.64	1.51667	1.1	1.04667
rna-XM_027273813.1	gene-LOC104919722	LOC104919722	myelin protein zero-like protein 2, transcript variant X3	0	0	0	0	0	0	0	0	0	0	0	0	0	0	0	0
rna-XR_003461490.1	gene-LOC104919722	LOC104919722	myelin protein zero-like protein 2, transcript variant X2	0	0	0	0	0	0	0	0	0	0	0	0	0	0	0	0
rna-XM_010731792.3	gene-LOC104919723	LOC104919723	Down syndrome cell adhesion molecule-like protein 1 homolog, transcript variant X2	0.01	0	0	0.01	0.04	0.01	0	0	0.01	0.03	0.01	0	0.003333	0.02	0.003333	0.013333
rna-XM_019276481.2	gene-LOC104919723	LOC104919723	Down syndrome cell adhesion molecule-like protein 1 homolog, transcript variant X1	0	0	0	0	0	0	0.06	0	0	0	0	0	0	0	0.02	0
rna-XM_019276474.2	gene-LOC104919724	LOC104919724	rho GTPase-activating protein 35	2.18	1.88	2.69	1.87	2.41	2.1	1.97	2.45	2.11	2.11	2.2	2.31	2.25	2.12667	2.17667	2.20667
rna-XM_010731795.3	gene-LOC104919725	LOC104919725	hypothetical protein, transcript variant X2	1.09	1.73	2.09	2.25	1.49	0.86	1.57	1.1	0.58	0.53	1.09	1.95	1.63667	1.53333	1.08333	1.19
rna-XM_019276478.2	gene-LOC104919725	LOC104919725	hypothetical protein, transcript variant X1	1.28	1.06	1.91	1.86	3.63	1.31	1.89	1.39	1.27	0.76	2.2	2.76	1.41667	2.26667	1.51667	1.90667
rna-XM_019276475.2	gene-LOC104919726	LOC104919726	unconventional myosin-Ic, transcript variant X2	0	0	0.23	0	0	0	0	0.56	0	0	0.06	0.37	0.076667	0	0.186667	0.143333
rna-XM_019276476.2	gene-LOC104919726	LOC104919726	unconventional myosin-Ic, transcript variant X3	1.47	1.9	3.28	1.82	1.84	3.38	1.99	0.43	2.77	2.04	1.62	1.11	2.21667	2.34667	1.73	1.59
rna-XM_019276477.2	gene-LOC104919726	LOC104919726	unconventional myosin-Ic, transcript variant X4	2.75	2.57	1.22	1.82	0.76	3.2	2.5	3.14	3.54	2.25	1.33	2.3	2.18	1.92667	3.06	1.96
rna-XM_027273901.1	gene-LOC104919726	LOC104919726	unconventional myosin-Ic, transcript variant X1	0	0	0	0.75	0	0	0.24	0.78	0	0	0.29	0.13	0	0.25	0.34	0.14
rna-XM_010731798.3	gene-LOC104919727	LOC104919727	ependymin-1	0	0	0	0	0	0	0	0	0	0	0	0.13	0	0	0	0.043333
rna-XM_010731799.3	gene-LOC104919728	LOC104919728	cohesin subunit SA-2, transcript variant X1	8.81	7.99	6.76	9.17	8.24	10.54	9.57	9.34	5.99	9.26	8.83	10.7	7.85333	9.31667	8.3	9.59667
rna-XM_019276473.2	gene-LOC104919728	LOC104919728	cohesin subunit SA-2, transcript variant X2	6.82	6.49	7.76	4.83	8.09	5.02	6.57	6.91	10.45	6.61	7.02	5.25	7.02333	5.98	7.97667	6.29333
rna-XM_027273464.1	gene-LOC104919730	LOC104919730	glutamate receptor 3, transcript variant X1	0.11	0.23	0	0.39	0	0.59	0	0.22	0.21	0.58	0.15	0.1	0.113333	0.326667	0.143333	0.276667
rna-XM_027273465.1	gene-LOC104919730	LOC104919730	glutamate receptor 3, transcript variant X2	1.22	0.92	0.61	1.39	0.56	1.17	1.42	0.88	1.03	0.58	1.18	0.79	0.916667	1.04	1.11	0.85
rna-XM_027273466.1	gene-LOC104919730	LOC104919730	glutamate receptor 3, transcript variant X4	0	0	0	0.03	0	0	0.04	0	0	0.05	0	0	0	0.01	0.013333	0.016667
rna-XM_027273467.1	gene-LOC104919730	LOC104919730	glutamate receptor 3, transcript variant X5	0	0	0	0.11	0	0.05	0	0.06	0	0	0	0	0	0.053333	0.02	0
rna-XM_027273468.1	gene-LOC104919730	LOC104919730	glutamate receptor 3, transcript variant X6	0	0	0	0	0	0	0	0	0.02	0	0	0	0	0	0.006667	0
rna-XM_027273469.1	gene-LOC104919730	LOC104919730	glutamate receptor 3, transcript variant X7	0.12	0.05	0.08	0.14	0.1	0.24	0.28	0.11	0.09	0.18	0.27	0.16	0.083333	0.16	0.16	0.203333
rna-XR_003461454.1	gene-LOC104919730	LOC104919730	glutamate receptor 3, transcript variant X3	0	0	0	0	0.08	0	0	0.1	0	0	0	0	0	0.026667	0.033333	0
rna-XM_010731802.3	gene-LOC104919732	LOC104919732	coiled-coil alpha-helical rod protein 1	2.37	2.11	2.19	1.76	2.29	1.74	1.98	1.99	2.09	2.09	2.08	2.01	2.22333	1.93	2.02	2.06
rna-XM_027273951.1	gene-LOC104919733	LOC104919733	neuroligin-3-like, transcript variant X1	0	0	0	0	0	0	0	0	0	0	0	0	0	0	0	0
rna-XM_027273952.1	gene-LOC104919733	LOC104919733	neuroligin-3-like, transcript variant X2	0	0	0	0	0	0	0	0	0	0	0	0	0	0	0	0
rna-XM_010731804.3	gene-LOC104919734	LOC104919734	myelin proteolipid protein-like, transcript variant X1	0	0	0	0	0	0	0	0	0	0	0	0	0	0	0	0
rna-XM_019269387.2	gene-LOC104919734	LOC104919734	myelin proteolipid protein-like, transcript variant X2	0	0	0.06	0	0	0.11	0.06	0	0	0	0	0.39	0.02	0.036667	0.02	0.13
rna-XM_010731806.3	gene-LOC104919735	LOC104919735	Tigger transposable element-derived protein 1, transcript variant X1	1.52	2.59	4.4	1.63	3.35	1.32	3.21	2.81	3.87	2.01	4.52	2.97	2.83667	2.1	3.29667	3.16667
rna-XM_019269402.2	gene-LOC104919735	LOC104919735	Tigger transposable element-derived protein 1, transcript variant X2	4.21	1.28	1.34	1.41	1.34	2.14	1.52	2.34	0.88	3.5	0.42	2.5	2.27667	1.63	1.58	2.14
rna-XM_027273676.1	gene-LOC104919735	LOC104919735	Tigger transposable element-derived protein 1, transcript variant X3	0	0.75	0.22	0	0	0.1	0	0	0.32	0	0	0	0.323333	0.033333	0.106667	0
rna-XM_010731848.3	gene-LOC104919738	LOC104919738	protein unc-13 homolog C, transcript variant X2	0.03	0.06	0.05	0	0.06	0.02	0.02	0.04	0.01	0.01	0	0	0.046667	0.026667	0.023333	0.003333
rna-XM_019278897.2	gene-LOC104919738	LOC104919738	protein unc-13 homolog C, transcript variant X1	0	0	0	0	0	0	0	0	0	0	0	0	0	0	0	0
rna-XM_010731813.3	gene-LOC104919740	LOC104919740	transcription initiation factor TFIID subunit 1, transcript variant X1	0	0	0	0	0	0	0	0	0	0	0	0	0	0	0	0
rna-XM_010731814.3	gene-LOC104919740	LOC104919740	transcription initiation factor TFIID subunit 1, transcript variant X2	0	0	0	0	0	0	0	0	0	0	0	0	0	0	0	0
rna-XM_010731816.3	gene-LOC104919740	LOC104919740	transcription initiation factor TFIID subunit 1, transcript variant X3	0	0	0.24	0.48	0.12	0	0	0	0	0	0	0.13	0.08	0.2	0	0.043333
rna-XM_010731817.3	gene-LOC104919740	LOC104919740	transcription initiation factor TFIID subunit 1, transcript variant X4	0	0	0	0	0	0	0	0	0	0	0	0	0	0	0	0
rna-XM_010731818.3	gene-LOC104919740	LOC104919740	transcription initiation factor TFIID subunit 1, transcript variant X5	0.68	0.52	0.76	0.37	0.84	1.48	1.14	1.27	0.4	0.81	1.56	0.47	0.653333	0.896667	0.936667	0.946667
rna-XM_010731819.3	gene-LOC104919740	LOC104919740	transcription initiation factor TFIID subunit 1, transcript variant X6	1.9	1.9	1.07	1.62	1.29	1.55	1.81	1.78	1.33	1.1	2.06	1.74	1.62333	1.48667	1.64	1.63333
rna-XM_010731820.3	gene-LOC104919741	LOC104919741	sodium-dependent proline transporter, transcript variant X2	4.98	3.83	4.63	4.77	4.42	5.67	5.29	5.76	4.24	5.05	6.13	3.9	4.48	4.95333	5.09667	5.02667
rna-XM_027273860.1	gene-LOC104919741	LOC104919741	sodium-dependent proline transporter, transcript variant X1	0	0.24	0.18	0.36	0.47	0.13	0.17	0	0	0.4	0	0	0.14	0.32	0.056667	0.133333
rna-XM_010731821.3	gene-LOC104919742	LOC104919742	lysophosphatidic acid receptor 6	1.17	1.64	1.68	1.68	1.25	1.94	1.92	1.35	2.13	1.7	1.75	1.65	1.49667	1.62333	1.8	1.7
rna-XM_019269404.2	gene-LOC104919744	LOC104919744	ribonucleoside-diphosphate reductase large subunit	5.53	4.77	3.92	3.85	3.42	3.65	4.23	5.35	3.97	4.05	4.33	4.61	4.74	3.64	4.51667	4.33
rna-XM_010731824.3	gene-LOC104919746	LOC104919746	RING finger protein 121, transcript variant X2	7.07	7.23	7.61	6.43	3.77	6	7.22	5.58	6.26	6.2	9.28	3.58	7.30333	5.4	6.35333	6.35333
rna-XM_027273398.1	gene-LOC104919746	LOC104919746	RING finger protein 121, transcript variant X1	5.53	9.2	5.83	7.29	10.47	8.31	7.89	8.86	7.34	6.53	4.03	12.72	6.85333	8.69	8.03	7.76
rna-XM_027273399.1	gene-LOC104919746	LOC104919746	RING finger protein 121, transcript variant X3	0	0	0.88	2.02	1.7	0	0	0	0	0	0	0.26	0.293333	1.24	0	0.086667
rna-XM_010731825.3	gene-LOC104919747	LOC104919747	protein NLRC3	15.09	16.66	15.61	12.66	14.67	14.45	14.25	14.39	15.34	15.85	15.26	16.02	15.7867	13.9267	14.66	15.71
rna-XM_019276472.2	gene-LOC104919751	LOC104919751	transcriptional regulator ATRX	6.4	5.97	6.09	6.13	7.31	5.3	6.26	5.68	6.09	6.13	6.16	6.95	6.15333	6.24667	6.01	6.41333
rna-XM_010731833.3	gene-LOC104919753	LOC104919753	inositol-trisphosphate 3-kinase C, transcript variant X1	0.86	1.39	1.2	0.18	0.7	1.49	1.15	1.84	0.71	1.01	1.55	1.14	1.15	0.79	1.23333	1.23333
rna-XM_027273739.1	gene-LOC104919753	LOC104919753	inositol-trisphosphate 3-kinase C, transcript variant X2	0	0	0	0	0.34	0	0	0	0	0	0	0	0	0.113333	0	0
rna-XM_010731834.3	gene-LOC104919754	LOC104919754	nectin-3-like protein, transcript variant X2	0	0	0	0	0	0	0.05	0	0.13	0	0	0	0	0	0.06	0
rna-XM_019276461.2	gene-LOC104919754	LOC104919754	nectin-3-like protein, transcript variant X1	0	0	0	0	0	0	0	0	0	0	0	0	0	0	0	0
rna-XM_010731835.3	gene-LOC104919755	LOC104919755	sodium channel subunit beta-4-like, transcript variant X1	0	0.01	0	0.01	0	0	0	0	0	0	0.01	0	0.003333	0.003333	0	0.003333
rna-XM_019276460.2	gene-LOC104919755	LOC104919755	sodium channel subunit beta-4-like, transcript variant X2	0	0	0	0	0	0	0	0	0	0	0	0	0	0	0	0
rna-XM_010731837.3	gene-LOC104919756	LOC104919756	short transient receptor potential channel 2	0	0	0	0.02	0	0	0	0	0	0.02	0.02	0	0	0.006667	0	0.013333
rna-XM_027280977.1	gene-LOC104919760	LOC104919760	cell surface A33 antigen	0.46	0.42	1.29	0.86	0.52	1.14	0.92	0.56	0.29	1.44	0.78	0.56	0.723333	0.84	0.59	0.926667
rna-XM_010731843.3	gene-LOC104919762	LOC104919762	hypothetical protein	32.72	39.29	27.52	46.33	62.56	48.08	35.03	23.75	29.88	40.85	44.47	34.67	33.1767	52.3233	29.5533	39.9967
rna-XM_027281911.1	gene-LOC104919763	LOC104919763	COUP transcription factor 2	1.34	1.24	0.71	1.72	1.71	1.44	1.47	2.11	1.95	1.34	1.77	1.58	1.09667	1.62333	1.84333	1.56333
rna-XM_010731845.3	gene-LOC104919765	LOC104919765	polycomb protein SCMH1, transcript variant X3	0.22	0	0	0.3	0	0.26	0	0.27	0	0	0.19	0.3	0.073333	0.186667	0.09	0.163333
rna-XM_010731846.3	gene-LOC104919765	LOC104919765	polycomb protein SCMH1, transcript variant X4	0	0	0	0	0.58	0	0	0.33	0.92	0	0.5	0.4	0	0.193333	0.416667	0.3
rna-XM_019278108.2	gene-LOC104919765	LOC104919765	polycomb protein SCMH1, transcript variant X1	0	0	0	0	0.08	0	0	0.03	0.2	0	0	0	0	0.026667	0.076667	0
rna-XM_019278110.2	gene-LOC104919765	LOC104919765	polycomb protein SCMH1, transcript variant X5	0.37	0.35	0.54	0.26	0	0.49	0.55	0.29	0	0.62	0.34	0	0.42	0.25	0.28	0.32
rna-XM_027281799.1	gene-LOC104919765	LOC104919765	polycomb protein SCMH1, transcript variant X2	0	0	0	0	0	0	0	0	0	0	0	0	0	0	0	0
rna-XM_010731847.3	gene-LOC104919766	LOC104919766	retinoschisin, transcript variant X1	0	0	0	0	0	0	0	0	0	0	0	0	0	0	0	0
rna-XM_027281539.1	gene-LOC104919766	LOC104919766	retinoschisin, transcript variant X2	0	0	0	0	0	0	0	0	0	0	0	0	0	0	0	0
rna-XM_010731860.3	gene-LOC104919773	LOC104919773	high choriolytic enzyme 1	0	0	0	0	0	0	0	0	0	0	0	0	0	0	0	0
rna-XM_019265541.2	gene-LOC104919776	LOC104919776	KH homology domain-containing protein 4	9.84	7.81	7.94	8.47	8.79	8.35	8.94	8.5	8.91	7.74	7.83	7.69	8.53	8.53667	8.78333	7.75333
rna-XM_010731864.3	gene-LOC104919780	LOC104919780	very long-chain acyl-CoA synthetase	0	0.02	0.02	0	0.02	0	0.06	0.02	0	0.02	0	0	0.013333	0.006667	0.026667	0.006667
rna-XM_010731865.3	gene-LOC104919781	LOC104919781	very long-chain acyl-CoA synthetase	0	0.1	0	0.06	0	0	0.03	0	0	0.03	0	0	0.033333	0.02	0.01	0.01
rna-XM_010731871.3	gene-LOC104919784	LOC104919784	myocyte-specific enhancer factor 2A, transcript variant X1	4	5.16	4.5	4.85	4.05	5.76	4.7	5.08	3.84	4.47	4.58	4.29	4.55333	4.88667	4.54	4.44667
rna-XM_019254021.2	gene-LOC104919784	LOC104919784	myocyte-specific enhancer factor 2A, transcript variant X2	0	0.16	0	0	0.14	0	0	0.27	0.87	0	0.24	0.22	0.053333	0.046667	0.38	0.153333
rna-XM_027281321.1	gene-LOC104919784	LOC104919784	myocyte-specific enhancer factor 2A, transcript variant X3	0	0	0	0	0	0	0.14	0	0	0	0	0.3	0	0	0.046667	0.1
rna-XM_010731869.3	gene-LOC104919786	LOC104919786	tropomodulin-2	20.29	20.84	18.99	27.39	24.58	26.04	22.85	24.58	23.11	29.38	26.93	21.17	20.04	26.0033	23.5133	25.8267
rna-XM_027281874.1	gene-LOC104919790	LOC104919790	immunoglobulin-like domain-containing receptor 1, transcript variant X1	0	0	0.32	0	0	0	0.22	0	0	0.09	0	0	0.106667	0	0.073333	0.03
rna-XM_027281875.1	gene-LOC104919790	LOC104919790	immunoglobulin-like domain-containing receptor 1, transcript variant X2	0	0.05	0.08	0.15	0.35	0	0.07	0.1	0	0	0.18	0.24	0.043333	0.166667	0.056667	0.14
rna-XM_027281816.1	gene-LOC104919791	LOC104919791	immunoglobulin-like domain-containing receptor 2, transcript variant X1	0.09	0.1	0.22	0	0	0	0.41	0	0	0.17	0	0	0.136667	0	0.136667	0.056667
rna-XM_027281817.1	gene-LOC104919791	LOC104919791	immunoglobulin-like domain-containing receptor 2, transcript variant X2	0.64	0.39	0.38	0	0.26	0.71	0.27	0.83	0.63	0.49	0.75	0.8	0.47	0.323333	0.576667	0.68
rna-XM_027281818.1	gene-LOC104919791	LOC104919791	immunoglobulin-like domain-containing receptor 2, transcript variant X3	0	0	0	0.6	0.45	0	0	0	0	0.22	0	0	0	0.35	0	0.073333
rna-XM_019278063.2	gene-LOC104919795	LOC104919795	uncharacterized LOC104919795	0.07	0	0	0	0	0	0.03	0	0	0	0.03	0	0.023333	0	0.01	0.01
rna-XM_027281610.1	gene-LOC104919796	LOC104919796	Nance-Horan syndrome protein, transcript variant X1	0	0	0	0	0	0	0	0	0	0	0	0	0	0	0	0
rna-XM_027281611.1	gene-LOC104919796	LOC104919796	Nance-Horan syndrome protein, transcript variant X2	0.03	0.02	0.03	0.01	0	0.01	0	0.05	0.02	0.03	0.04	0.02	0.026667	0.006667	0.023333	0.03
rna-XM_019278101.2	gene-LOC104919797	LOC104919797	cyclin-dependent kinase-like 5, transcript variant X1	0	0	0	0	0	0	0	0	0	0	0	0	0	0	0	0
rna-XM_019278103.2	gene-LOC104919797	LOC104919797	cyclin-dependent kinase-like 5, transcript variant X2	0	0	0.01	0	0	0	0	0.01	0	0	0.03	0	0.003333	0	0.003333	0.01
rna-XM_019278104.2	gene-LOC104919797	LOC104919797	cyclin-dependent kinase-like 5, transcript variant X3	0	0	0	0	0	0	0	0	0	0	0	0	0	0	0	0
rna-XM_019278105.2	gene-LOC104919797	LOC104919797	cyclin-dependent kinase-like 5, transcript variant X5	0	0	0	0	0	0	0	0	0	0	0	0	0	0	0	0
rna-XM_027281854.1	gene-LOC104919797	LOC104919797	cyclin-dependent kinase-like 5, transcript variant X4	0	0	0	0	0	0	0	0	0	0	0	0	0	0	0	0
rna-XM_019278100.2	gene-LOC104919798	LOC104919798	serine/threonine-protein phosphatase with EF-hands 1	0	0	0	0	0	0.06	0.02	0	0.03	0	0	0	0	0.02	0.016667	0
rna-XM_010731890.3	gene-LOC104919804	LOC104919804	galectin-3, transcript variant X2	0	0	0	0	0	1.17	0	0.14	0	0	0	0	0	0.39	0.046667	0
rna-XM_010731893.3	gene-LOC104919804	LOC104919804	galectin-3, transcript variant X4	0.05	0.57	0	0.04	0.26	4.68	0.52	1.12	0	0.7	0.9	0.51	0.206667	1.66	0.546667	0.703333
rna-XM_027284686.1	gene-LOC104919804	LOC104919804	galectin-3, transcript variant X1	0	0	0.08	0	0	0	0	0	0	0	0.16	0	0.026667	0	0	0.053333
rna-XM_027284687.1	gene-LOC104919804	LOC104919804	galectin-3, transcript variant X3	0	0	0	0	0	0.91	0	0	0.1	0	0	0	0	0.303333	0.033333	0
rna-XM_010731894.3	gene-LOC104919806	LOC104919806	MAX gene-associated protein, transcript variant X1	0.26	0.15	0.37	0	0.81	0.56	0.24	0.75	0.13	0.38	0.82	0.63	0.26	0.456667	0.373333	0.61
rna-XM_010731896.3	gene-LOC104919806	LOC104919806	MAX gene-associated protein, transcript variant X2	1.74	1.8	1.41	1.71	0.81	0.86	1.9	1.09	1.62	1.37	0.71	0.99	1.65	1.12667	1.53667	1.02333
rna-XM_019263234.2	gene-LOC104919807	LOC104919807	echinoderm microtubule-associated protein-like 1, transcript variant X1	0.05	0	0	0	0	0.16	0	0	0	0	0	0	0.016667	0.053333	0	0
rna-XM_019263235.2	gene-LOC104919807	LOC104919807	echinoderm microtubule-associated protein-like 1, transcript variant X2	0.05	0.1	0.11	0.1	0.03	0	0.14	0.14	0.14	0.13	0.03	0.06	0.086667	0.043333	0.14	0.073333
rna-XM_010731897.3	gene-LOC104919808	LOC104919808	ena/VASP-like protein, transcript variant X1	0	0	0	0	0	0	0	0	0	0	0	0	0	0	0	0
rna-XM_019263227.2	gene-LOC104919808	LOC104919808	ena/VASP-like protein, transcript variant X2	0.06	0.04	0	0	0.05	0	0	0	0.04	0	0	0	0.033333	0.016667	0.013333	0
rna-XM_019263228.2	gene-LOC104919808	LOC104919808	ena/VASP-like protein, transcript variant X3	0.07	0.19	0.07	0.24	0.06	0.32	0.19	0.13	0.06	0.22	0.1	0.09	0.11	0.206667	0.126667	0.136667
rna-XM_027284192.1	gene-LOC104919809	LOC104919809	transcriptional repressor protein YY1, transcript variant X1	0.47	0.39	0	0.25	0.49	0	0	0.32	0.3	0	0	0.23	0.286667	0.246667	0.206667	0.076667
rna-XM_027284193.1	gene-LOC104919809	LOC104919809	transcriptional repressor protein YY1, transcript variant X2	0.58	0.39	1.42	1.04	0.7	1.03	1.26	1.32	0.99	0.6	0.71	0.63	0.796667	0.923333	1.19	0.646667
rna-XM_027284194.1	gene-LOC104919809	LOC104919809	transcriptional repressor protein YY1, transcript variant X3	5.41	4.04	4.51	6.48	4.37	4.01	4.48	4.9	4.71	5.11	6.26	5.24	4.65333	4.95333	4.69667	5.53667
rna-XM_010731901.3	gene-LOC104919811	LOC104919811	methylmalonate-semialdehyde dehydrogenase [acylating], mitochondrial	8.95	7.21	9.82	8.76	7.72	10.49	10.36	7.28	10.07	8.65	7.44	7.32	8.66	8.99	9.23667	7.80333
rna-XM_010731903.3	gene-LOC104919812	LOC104919812	ectonucleoside triphosphate diphosphohydrolase 5	2.57	3.1	2.29	2.6	2	2.16	2.83	2.99	2.17	1.27	1.76	4.45	2.65333	2.25333	2.66333	2.49333
rna-XM_019263246.2	gene-LOC104919814	LOC104919814	CLOCK-interacting pacemaker-like	1.6	3.5	3.54	3.11	2.91	5.79	4.18	1.41	3.57	1.88	0.8	2.79	2.88	3.93667	3.05333	1.82333
rna-XM_027284078.1	gene-LOC104919815	LOC104919815	vascular endothelial growth factor A-like, transcript variant X1	0	0.12	0	0.27	0	0	0	0	0.65	0	0	0	0.04	0.09	0.216667	0
rna-XM_027284079.1	gene-LOC104919815	LOC104919815	vascular endothelial growth factor A-like, transcript variant X2	0	0	0	0	0	0.32	0	0	0	0	0	0	0	0.106667	0	0
rna-XM_027284080.1	gene-LOC104919815	LOC104919815	vascular endothelial growth factor A-like, transcript variant X3	0	0	0	0	0	0	0	0	0	0	0	0	0	0	0	0
rna-XM_027284081.1	gene-LOC104919815	LOC104919815	vascular endothelial growth factor A-like, transcript variant X4	3.51	3.39	1.75	4.05	5.74	5.97	2.69	2.95	5.23	2.14	6.93	1.38	2.88333	5.25333	3.62333	3.48333
rna-XM_027284082.1	gene-LOC104919815	LOC104919815	vascular endothelial growth factor A-like, transcript variant X5	0	0	0	0.4	0	0	0	0	0	0	0	0	0	0.133333	0	0
rna-XM_027284083.1	gene-LOC104919815	LOC104919815	vascular endothelial growth factor A-like, transcript variant X6	2.06	0.88	0	0.82	0.65	1.16	1.88	0.45	0.55	2.41	1.91	0.35	0.98	0.876667	0.96	1.55667
rna-XM_010731913.3	gene-LOC104919817	LOC104919817	asc-type amino acid transporter 1	6.41	7.01	6.15	5.12	6.7	6.45	6.28	6.74	5.27	5.76	5.93	5.6	6.52333	6.09	6.09667	5.76333
rna-XM_019263240.2	gene-LOC104919818	LOC104919818	homeobox protein OTX2, transcript variant X2	0	0	0	0	0	0	0	0	0	0	0	0	0	0	0	0
rna-XM_019263241.2	gene-LOC104919818	LOC104919818	homeobox protein OTX2, transcript variant X3	0	0	0	0.03	0.03	0	0	0	0	0	0	0	0	0.02	0	0
rna-XM_027283863.1	gene-LOC104919818	LOC104919818	homeobox protein OTX2, transcript variant X1	0	0	0	0	0	0	0	0	0	0	0	0	0	0	0	0
rna-XM_010731911.3	gene-LOC104919819	LOC104919819	E3 ubiquitin-protein ligase pellino homolog 2	1.12	2.31	0.71	4.91	1.84	2.42	2.74	3.01	1.99	1.61	1.93	4.67	1.38	3.05667	2.58	2.73667
rna-XM_010731912.3	gene-LOC104919820	LOC104919820	ADP-ribosylation factor 6, transcript variant X1	54.01	51.58	58.57	59.47	76.86	43.3	53.63	58.1	51.26	71.36	82.35	52.5	54.72	59.8767	54.33	68.7367
rna-XM_010731914.3	gene-LOC104919820	LOC104919820	ADP-ribosylation factor 6, transcript variant X2	48.55	32.34	35.83	35.15	42.45	40.75	36.23	41.66	36.96	39.68	47.85	41.64	38.9067	39.45	38.2833	43.0567
rna-XM_019268670.2	gene-LOC104919824	LOC104919824	mitogen-activated protein kinase-binding protein 1	0.16	0.15	0.09	0.1	0.05	0.22	0.25	0.3	0.07	0.16	0.2	0.1	0.133333	0.123333	0.206667	0.153333
rna-XM_010731919.3	gene-LOC104919825	LOC104919825	gonadotropin-releasing hormone receptor	0	0	0	0	0	0	0	0	0	0	0	0	0	0	0	0
rna-XM_010731921.3	gene-LOC104919828	LOC104919828	leucine-rich repeat and fibronectin type-III domain-containing protein 5-like	0.06	0.01	0	0	0	0	0	0	0	0.03	0	0	0.023333	0	0	0.01
rna-XM_010731925.3	gene-LOC104919831	LOC104919831	olfactory receptor 52J3	0	0	0	0	0	0	0	0	0	0	0	0	0	0	0	0
rna-XM_010731926.3	gene-LOC104919833	LOC104919833	olfactory receptor 5B12-like	0	0	0	0	0	0	0	0	0	0	0	0	0	0	0	0
rna-XM_010731927.3	gene-LOC104919834	LOC104919834	post-GPI attachment to proteins factor 2-like, transcript variant X1	0	0	0	0	0	0	0	0.05	0	0	0	0	0	0	0.016667	0
rna-XM_027280683.1	gene-LOC104919834	LOC104919834	post-GPI attachment to proteins factor 2-like, transcript variant X2	0	0	0	0	0	0	0	0	0	0	0	0	0	0	0	0
rna-XM_010731928.3	gene-LOC104919835	LOC104919835	stromal interaction molecule 1-like, transcript variant X1	17.79	17.66	15.3	16.8	16.31	16.48	14.62	16.17	16.15	17.04	17.39	15.13	16.9167	16.53	15.6467	16.52
rna-XM_010731930.3	gene-LOC104919835	LOC104919835	stromal interaction molecule 1-like, transcript variant X2	1.53	1.01	0.61	0.69	0.72	1.4	1.17	1.23	1.07	1.57	0.91	1.54	1.05	0.936667	1.15667	1.34
rna-XM_010731939.3	gene-LOC104919838	LOC104919838	roundabout homolog 1, transcript variant X3	0	0	0	0	0	0	0	0	0	0	0	0	0	0	0	0
rna-XM_019261846.2	gene-LOC104919838	LOC104919838	roundabout homolog 1, transcript variant X1	0	0	0	0.16	0	0.09	0	0.2	0	0	0	0	0	0.083333	0.066667	0
rna-XM_019261847.2	gene-LOC104919838	LOC104919838	roundabout homolog 1, transcript variant X2	0	0.07	0	0.01	0	0.03	0.04	0.09	0	0.01	0	0	0.023333	0.013333	0.043333	0.003333
rna-XM_019261848.2	gene-LOC104919838	LOC104919838	roundabout homolog 1, transcript variant X6	0	0	0	0	0	0	0	0	0	0	0	0	0	0	0	0
rna-XM_019261849.2	gene-LOC104919838	LOC104919838	roundabout homolog 1, transcript variant X8	0.02	0.05	0.12	0.13	0.27	0.26	0.15	0.05	0.12	0.14	0.11	0.15	0.063333	0.22	0.106667	0.133333
rna-XM_019261850.2	gene-LOC104919838	LOC104919838	roundabout homolog 1, transcript variant X9	0.05	0.06	0	0.01	0.13	0	0	0.02	0	0.05	0.14	0	0.036667	0.046667	0.006667	0.063333
rna-XM_019261852.2	gene-LOC104919838	LOC104919838	roundabout homolog 1, transcript variant X11	0.03	0.25	0	0	0.15	0.05	0	0.13	0.22	0.14	0.19	0	0.093333	0.066667	0.116667	0.11
rna-XM_027280234.1	gene-LOC104919838	LOC104919838	roundabout homolog 1, transcript variant X4	0	0	0.07	0	0	0	0	0	0	0	0	0	0.023333	0	0	0
rna-XM_027280235.1	gene-LOC104919838	LOC104919838	roundabout homolog 1, transcript variant X5	0	0	0	0	0	0	0	0	0	0	0	0	0	0	0	0
rna-XM_027280236.1	gene-LOC104919838	LOC104919838	roundabout homolog 1, transcript variant X7	0	0	0	0	0	0	0	0	0	0.08	0	0	0	0	0	0.026667
rna-XM_027280238.1	gene-LOC104919838	LOC104919838	roundabout homolog 1, transcript variant X10	0.22	0.28	0.17	0.19	0.24	0.11	0	0.06	0.11	0.31	0.12	0.09	0.223333	0.18	0.056667	0.173333
rna-XM_027280239.1	gene-LOC104919838	LOC104919838	roundabout homolog 1, transcript variant X12	0	0.09	0	0	0.15	0	0.19	0.36	0.04	0.03	0	0.13	0.03	0.05	0.196667	0.053333
rna-XM_010731940.3	gene-LOC104919839	LOC104919839	amyloid-beta A4 precursor protein-binding family B member 1, transcript variant X1	7.08	8.42	8.85	8.37	9.52	9.86	9.76	9.87	8.28	9.67	8.94	8.89	8.11667	9.25	9.30333	9.16667
rna-XM_010731941.3	gene-LOC104919839	LOC104919839	amyloid-beta A4 precursor protein-binding family B member 1, transcript variant X3	5.66	3.61	4.45	4.78	6.04	6.02	4.62	4.19	5.24	6.05	5.78	4.23	4.57333	5.61333	4.68333	5.35333
rna-XM_027280466.1	gene-LOC104919839	LOC104919839	amyloid-beta A4 precursor protein-binding family B member 1, transcript variant X2	0	0	0	0	0	0	0	0	0	0	0	0	0	0	0	0
rna-XM_019261845.2	gene-LOC104919841	LOC104919841	integrin-linked protein kinase	23.78	22.95	21.06	23.41	25.8	27.29	23.74	23.8	26.11	25.92	28.02	24.84	22.5967	25.5	24.55	26.26
rna-XM_010731944.3	gene-LOC104919842	LOC104919842	ribosomal RNA processing 8	1.45	0	0.71	2.79	1.31	0	1.28	0.43	2.31	1.82	1.21	3.51	0.72	1.36667	1.34	2.18
rna-XM_010731945.3	gene-LOC104919843	LOC104919843	nectin-3-like protein, transcript variant X2	8.41	10	12.66	9.24	11.18	9.54	11.68	9.97	8.78	10.05	11.53	12.67	10.3567	9.98667	10.1433	11.4167
rna-XM_019261840.2	gene-LOC104919843	LOC104919843	nectin-3-like protein, transcript variant X1	2.2	2.85	3.67	1.44	2.16	2.95	1.44	3.27	1.52	1.97	1.02	2.98	2.90667	2.18333	2.07667	1.99
rna-XM_019261841.2	gene-LOC104919845	LOC104919845	diablo homolog, mitochondrial, transcript variant X1	11.77	12.38	11.18	8.52	9.25	9.26	9.22	11.23	14.26	9.72	10.64	13.17	11.7767	9.01	11.57	11.1767
rna-XM_019261843.2	gene-LOC104919845	LOC104919845	diablo homolog, mitochondrial, transcript variant X2	2.82	4.79	7.72	9	7.13	3.26	6.44	4.77	5	5.07	6.73	5.5	5.11	6.46333	5.40333	5.76667
rna-XM_010731948.3	gene-LOC104919846	LOC104919846	odorant receptor 131-2	0	0	0	0	0	0	0	0	0	0	0	0	0	0	0	0
gene-LOC104919847	gene-LOC104919847	LOC104919847	-	0	0	0	0	0	0	0	0	0	0	0	0	0	0	0	0
rna-XM_010731951.3	gene-LOC104919848	LOC104919848	odorant receptor 131-2-like	0	0	0	0	0	0	0	0	0	0	0	0	0	0	0	0
rna-XM_010731952.3	gene-LOC104919849	LOC104919849	odorant receptor 131-2-like	0	0	0	0	0	0	0	0	0	0	0	0	0	0	0	0
rna-XM_010731953.2	gene-LOC104919850	LOC104919850	olfactory receptor 24-like	0	0	0	0	0	0	0	0	0	0	0	0	0	0	0	0
rna-XM_019261832.2	gene-LOC104919851	LOC104919851	olfactory receptor 52N4-like	0	0	0	0	0	0	0	0	0	0	0	0	0	0	0	0
rna-XM_019261831.2	gene-LOC104919852	LOC104919852	neuronal acetylcholine receptor subunit alpha-9	0	0	0.03	0	0	0	0	0	0	0.1	0	0	0.01	0	0	0.033333
rna-XM_019261830.2	gene-LOC104919853	LOC104919853	protein sel-1 homolog 3	0.02	0	0.03	0.06	0	0.06	0.05	0.03	0.02	0	0	0.03	0.016667	0.04	0.033333	0.01
rna-XM_019261844.2	gene-LOC104919854	LOC104919854	uncharacterized LOC104919854	3.45	2.46	4.11	3.44	1.89	2.07	1.85	2.66	1.6	2.8	2.28	2.88	3.34	2.46667	2.03667	2.65333
rna-XM_010731958.3	gene-LOC104919855	LOC104919855	odorant receptor 131-2-like	0	0	0	0	0	0	0	0	0	0	0	0	0	0	0	0
rna-XM_010731960.3	gene-LOC104919857	LOC104919857	odorant receptor 131-2	0	0	0	0	0	0	0	0	0	0	0	0	0	0	0	0
rna-XM_027280385.1	gene-LOC104919858	LOC104919858	odorant receptor 131-2-like	0.73	0.76	0.75	0.47	0.89	0.16	0.66	0.57	0.37	0.49	0.58	0.53	0.746667	0.506667	0.533333	0.533333
rna-XM_010731974.3	gene-LOC104919866	LOC104919866	cadherin-8, transcript variant X1	0	0	0	0	0	0	0	0	0	0	0	0	0	0	0	0
rna-XM_019254043.2	gene-LOC104919866	LOC104919866	cadherin-8, transcript variant X2	0.03	0	0	0.02	0	0	0	0	0.03	0	0.03	0	0.01	0.006667	0.01	0.01
rna-XM_019254044.2	gene-LOC104919866	LOC104919866	cadherin-8, transcript variant X3	0.32	0.49	0.23	0.3	0.65	0.51	0.7	0.49	0.3	0.56	0.15	0.38	0.346667	0.486667	0.496667	0.363333
rna-XM_019254045.2	gene-LOC104919866	LOC104919866	cadherin-8, transcript variant X4	0	0	0	0	0	0	0	0	0	0	0	0	0	0	0	0
rna-XM_010731992.3	gene-LOC104919878	LOC104919878	ETS-related transcription factor Elf-4, transcript variant X1	6.97	4.03	4.94	8.42	8.85	4.69	4.86	4.66	3.99	6.36	5.05	2.96	5.31333	7.32	4.50333	4.79
rna-XM_010731993.3	gene-LOC104919878	LOC104919878	ETS-related transcription factor Elf-4, transcript variant X2	0.65	1.65	1.38	1.35	2.89	1.21	1.1	1.32	0.9	1.42	2.45	3.44	1.22667	1.81667	1.10667	2.43667
rna-XM_010731994.3	gene-LOC104919878	LOC104919878	ETS-related transcription factor Elf-4, transcript variant X3	48.15	36.19	37.41	32.13	41.28	41.65	40.11	42.19	40.73	43.21	46.81	38.67	40.5833	38.3533	41.01	42.8967
rna-XM_010732000.3	gene-LOC104919880	LOC104919880	synapse-associated protein 1	21.05	19.69	20.08	20.52	20.47	22.12	21.83	20.32	21.54	23.87	22.09	19.66	20.2733	21.0367	21.23	21.8733
rna-XM_019278383.2	gene-LOC104919884	LOC104919884	peripherin	0.13	0.03	0.03	0.18	0.21	0.03	0.03	0.16	0	0.03	0.06	0.11	0.063333	0.14	0.063333	0.066667
rna-XM_010732010.3	gene-LOC104919890	LOC104919890	Y+L amino acid transporter 2	0.23	0.71	0.32	0.45	0.3	0.27	0.4	0.28	0.36	0.35	0.34	0.47	0.42	0.34	0.346667	0.386667
rna-XM_019272019.2	gene-LOC104919891	LOC104919891	glycine receptor subunit alpha-2, transcript variant X1	0	0	0	0	0	0	0	0	0	0	0	0	0	0	0	0
rna-XM_027283781.1	gene-LOC104919891	LOC104919891	glycine receptor subunit alpha-2, transcript variant X2	0	0.03	0.03	0	0	0.03	0	0	0.08	0	0	0	0.02	0.01	0.026667	0
rna-XM_010732009.3	gene-LOC104919892	LOC104919892	uncharacterized LOC104919892	0.27	0.09	0.23	0.28	0.13	1.33	0.32	0.53	0.38	0.28	0.33	0.33	0.196667	0.58	0.41	0.313333
rna-XM_010732011.3	gene-LOC104919893	LOC104919893	hypothetical protein, transcript variant X1	0	0	0	0	0	0	0	0	0	0	0	0	0	0	0	0
rna-XR_003463798.1	gene-LOC104919893	LOC104919893	hypothetical protein, transcript variant X2	0	0	0	0	0	0	0	0	0	0	0	0	0	0	0	0
rna-XM_019273904.2	gene-LOC104919896	LOC104919896	integrin alpha-5	4.91	4.97	5.73	6.66	9.42	8.37	6.15	5.86	6.61	5.64	7.06	5.13	5.20333	8.15	6.20667	5.94333
rna-XM_010732021.3	gene-LOC104919902	LOC104919902	cell adhesion molecule 2-like	21.45	19.11	14.7	15.75	15.79	17.22	17.86	16.75	14.88	13.37	13.14	21.52	18.42	16.2533	16.4967	16.01
rna-XM_010732023.3	gene-LOC104919903	LOC104919903	uncharacterized LOC104919903	6.3	9.07	9.18	7.77	7.72	6.9	7.82	6.65	8.26	9.43	8.16	6.82	8.18333	7.46333	7.57667	8.13667
rna-XM_010732024.3	gene-LOC104919904	LOC104919904	bridging integrator 2, transcript variant X2	0	0.19	0	0	0.03	0	0	0.06	0.03	0.14	0	0	0.063333	0.01	0.03	0.046667
rna-XM_019273805.2	gene-LOC104919904	LOC104919904	bridging integrator 2, transcript variant X1	0.03	0	0.14	0.13	0	0.21	0.08	0	0	0	0.14	0.27	0.056667	0.113333	0.026667	0.136667
rna-XM_010732028.3	gene-LOC104919906	LOC104919906	coenzyme Q-binding protein COQ10 homolog A, mitochondrial, transcript variant X1	4.25	4.01	3.05	3.73	4	3.19	3.73	3.69	3.93	3.07	3.94	3.57	3.77	3.64	3.78333	3.52667
rna-XR_003463853.1	gene-LOC104919906	LOC104919906	coenzyme Q-binding protein COQ10 homolog A, mitochondrial, transcript variant X2	0	0	0	0	0	0	0	0	0	0.21	0	0.15	0	0	0	0.12
rna-XM_010732031.3	gene-LOC104919910	LOC104919910	diacylglycerol kinase alpha-like, transcript variant X1	14.05	18.48	14.79	13.65	11.85	12.44	17.14	15	22.66	18.16	19.76	15.65	15.7733	12.6467	18.2667	17.8567
rna-XM_010732032.3	gene-LOC104919910	LOC104919910	diacylglycerol kinase alpha-like, transcript variant X2	0	0.38	0.38	0.53	0.24	0.73	0.7	0	0	0.19	0.19	0.15	0.253333	0.5	0.233333	0.176667
rna-XM_010732039.3	gene-LOC104919913	LOC104919913	gametocyte-specific factor 1, transcript variant X1	3.16	1.11	0	1.27	0.54	0	0	2.33	1.13	0.67	2.85	1.12	1.42333	0.603333	1.15333	1.54667
rna-XM_019279580.2	gene-LOC104919913	LOC104919913	gametocyte-specific factor 1, transcript variant X2	0.01	0	0	0	0	0.36	1.01	0	0	0	0	0	0.003333	0.12	0.336667	0
rna-XM_010732080.3	gene-LOC104919916	LOC104919916	RNA polymerase II elongation factor ELL	1.14	0.96	1.17	1.13	1.21	1.39	1.46	1.35	1.27	0.94	1.15	0.58	1.09	1.24333	1.36	0.89
rna-XM_010732044.3	gene-LOC104919917	LOC104919917	nuclear envelope integral membrane protein 1, transcript variant X1	4.31	5.35	5.47	4.75	4.72	4.62	4.64	5.59	5.24	4.26	5.68	6.01	5.04333	4.69667	5.15667	5.31667
rna-XM_027288633.1	gene-LOC104919917	LOC104919917	nuclear envelope integral membrane protein 1, transcript variant X2	1.75	0	0.16	0	0	0	0	0	0	0.63	0	0	0.636667	0	0	0.21
rna-XM_019253215.2	gene-LOC104919920	LOC104919920	spermatogenesis-associated serine-rich protein 2, transcript variant X1	14.13	9.57	0	6.96	14.75	12.42	2.23	14.15	12.31	6.22	10.48	10.25	7.9	11.3767	9.56333	8.98333
rna-XM_027288302.1	gene-LOC104919920	LOC104919920	spermatogenesis-associated serine-rich protein 2, transcript variant X2	0.2	0	0	0	0	0	0	0	0	0.12	0.1	0	0.066667	0	0	0.073333
rna-XM_010732049.3	gene-LOC104919921	LOC104919921	transmembrane protein 198	0.56	0.59	0.12	0.26	0.19	0.33	0.12	0.17	0.26	0.16	0.36	0.21	0.423333	0.26	0.183333	0.243333
rna-XM_027281416.1	gene-LOC104919923	LOC104919923	adhesion G-protein coupled receptor G1-like, transcript variant X1	0	0	0	0	0	0	0	0	0	0	0	0	0	0	0	0
rna-XM_027281417.1	gene-LOC104919923	LOC104919923	adhesion G-protein coupled receptor G1-like, transcript variant X2	0	0	0.07	0	0	0	0	0	0	0	0.04	0	0.023333	0	0	0.013333
rna-XM_027281418.1	gene-LOC104919923	LOC104919923	adhesion G-protein coupled receptor G1-like, transcript variant X3	0.1	0.13	0	0.05	0.09	0	0	0	0.14	0.1	0	0.21	0.076667	0.046667	0.046667	0.103333
rna-XM_027281419.1	gene-LOC104919923	LOC104919923	adhesion G-protein coupled receptor G1-like, transcript variant X4	0	0	0.09	0.11	0	0.11	0.06	0.14	0	0.07	0.05	0	0.03	0.073333	0.066667	0.04
rna-XM_027281420.1	gene-LOC104919923	LOC104919923	adhesion G-protein coupled receptor G1-like, transcript variant X5	34.2	50.9	48.67	55.59	65.8	47.37	42.14	50.42	36.88	42.6	78.88	68.26	44.59	56.2533	43.1467	63.2467
rna-XM_027281421.1	gene-LOC104919923	LOC104919923	adhesion G-protein coupled receptor G1-like, transcript variant X6	3.58	7.89	4.33	9.14	8.76	4.68	4.24	3.63	4.25	4.99	7.24	7.56	5.26667	7.52667	4.04	6.59667
rna-XM_010732053.3	gene-LOC104919925	LOC104919925	transcriptional repressor scratch 1	0	0	0.01	0	0	0	0	0	0	0	0	0	0.003333	0	0	0
rna-XM_010732055.3	gene-LOC104919927	LOC104919927	ubiquitin-conjugating enzyme E2 variant 1-like, transcript variant X2	51.85	42.82	44.03	44.2	48.34	38.43	39.63	45.39	44.9	44.18	44.28	47.82	46.2333	43.6567	43.3067	45.4267
rna-XM_027288956.1	gene-LOC104919927	LOC104919927	ubiquitin-conjugating enzyme E2 variant 1-like, transcript variant X1	0	0.36	0	0	0.2	0	0	0	0.5	0	0.39	0.16	0.12	0.066667	0.166667	0.183333
rna-XM_010732056.3	gene-LOC104919928	LOC104919928	transmembrane protein 189-like	18.04	18.41	18.35	19.89	20.26	19.64	16.36	18.04	19.25	18.51	20.21	20.55	18.2667	19.93	17.8833	19.7567
rna-XM_010732057.3	gene-LOC104919929	LOC104919929	CCAAT/enhancer-binding protein beta	142.76	146.38	124.96	228.31	311.86	248.01	165.11	172.42	190.45	180.11	288.42	206.71	138.033	262.727	175.993	225.08
rna-XM_010732063.3	gene-LOC104919932	LOC104919932	tubulin alpha-8 chain	0.18	0.23	0.17	0.32	0.03	0.28	0.16	0.18	0.06	0.47	0.1	0.15	0.193333	0.21	0.133333	0.24
rna-XM_010732064.3	gene-LOC104919933	LOC104919933	lysine-specific demethylase 5B-B, transcript variant X1	5.29	3.81	3.47	8.18	8.89	7.34	3.53	6.12	6.06	6.15	5.5	8.67	4.19	8.13667	5.23667	6.77333
rna-XM_010732065.3	gene-LOC104919933	LOC104919933	lysine-specific demethylase 5B-B, transcript variant X2	7.52	5.31	5.55	3.27	4.96	5.46	6.88	5.87	4.71	5.49	6.28	3.28	6.12667	4.56333	5.82	5.01667
rna-XM_010732066.3	gene-LOC104919933	LOC104919933	lysine-specific demethylase 5B-B, transcript variant X3	6.88	8.42	7.17	4.61	4.6	5.82	9.16	7.27	7.59	6.9	7.37	3.87	7.49	5.01	8.00667	6.04667
rna-XM_010732067.3	gene-LOC104919934	LOC104919934	ras-related protein Rap-1A	142.24	186.31	167.56	158.44	164.94	159.46	180.64	179.7	174.28	169.04	189.35	159.6	165.37	160.947	178.207	172.663
rna-XM_027288617.1	gene-LOC104919935	LOC104919935	XK-related protein 7	0	0.01	0.01	0.04	0	0.04	0.08	0.01	0.04	0	0	0	0.006667	0.026667	0.043333	0
rna-XM_010732072.3	gene-LOC104919936	LOC104919936	rhodopsin kinase	0.03	0.11	0	0	0.03	0	0	0.03	0	0	0	0.03	0.046667	0.01	0.01	0.01
rna-XM_027288664.1	gene-LOC104919937	LOC104919937	proteasomal ubiquitin receptor ADRM1	0.46	0.88	1.42	0.73	1.03	0.24	0.67	0.97	0.94	0.64	0.91	2.06	0.92	0.666667	0.86	1.20333
rna-XM_019273878.2	gene-LOC104919938	LOC104919938	plexin-A2, transcript variant X1	0	0	0.04	0	0.04	0	0.05	0	0.03	0	0	0.04	0.013333	0.013333	0.026667	0.013333
rna-XM_019273879.1	gene-LOC104919938	LOC104919938	plexin-A2, transcript variant X2	0.07	0.06	0.04	0.03	0.05	0.14	0.02	0.06	0.04	0.08	0.05	0.02	0.056667	0.073333	0.04	0.05
rna-XM_019273905.2	gene-LOC104919939	LOC104919939	rap guanine nucleotide exchange factor 3, transcript variant X1	4.23	2.02	2.69	2.61	3.74	2.92	2.43	1.15	2.68	2.75	3.06	2	2.98	3.09	2.08667	2.60333
rna-XM_019273906.2	gene-LOC104919939	LOC104919939	rap guanine nucleotide exchange factor 3, transcript variant X2	0.48	1.35	0.33	2.83	1.35	1.99	1.58	4.44	1.53	1.16	1.55	1.71	0.72	2.05667	2.51667	1.47333
rna-XM_019273774.2	gene-LOC104919941	LOC104919941	inactive dipeptidyl peptidase 10	0.15	0.07	0.07	0.08	0.02	0.14	0.1	0.13	0.02	0.03	0.09	0.11	0.096667	0.08	0.083333	0.076667
rna-XM_010732076.3	gene-LOC104919943	LOC104919943	matrix metalloproteinase-19, transcript variant X1	0.12	0	0	0.08	0	0	0	0.09	0	0	0	0	0.04	0.026667	0.03	0
rna-XM_019279444.2	gene-LOC104919943	LOC104919943	matrix metalloproteinase-19, transcript variant X2	0	0.11	0.09	0	0.06	0.03	0.06	0	0.03	0.03	0.03	0.1	0.066667	0.03	0.03	0.053333
rna-XM_010732077.2	gene-LOC104919944	LOC104919944	thyrotropin-releasing hormone receptor	0	0	0	0	0	0	0	0	0	0	0	0	0	0	0	0
rna-XM_019257188.2	gene-LOC104919949	LOC104919949	CDK5 and ABL1 enzyme substrate 2, transcript variant X1	4.36	4.83	5.27	3.99	4.65	3.85	4.03	5.97	4.17	4.13	6.08	4.93	4.82	4.16333	4.72333	5.04667
rna-XM_019257195.2	gene-LOC104919949	LOC104919949	CDK5 and ABL1 enzyme substrate 2, transcript variant X2	0.45	0.44	1.11	0.33	2.26	1.44	1.56	0.99	1.08	0.32	1.43	1.5	0.666667	1.34333	1.21	1.08333
rna-XM_019258841.2	gene-LOC104919953	LOC104919953	leucine-rich repeat-containing protein 3	0.03	0.01	0.01	0.01	0	0.02	0	0.07	0.01	0	0.04	0	0.016667	0.01	0.026667	0.013333
rna-XM_019258839.2	gene-LOC104919954	LOC104919954	collagen alpha-1(II) chain, transcript variant X1	0.04	0	0	0	0	0	0	0	0	0	0	0	0.013333	0	0	0
rna-XM_019258840.2	gene-LOC104919954	LOC104919954	collagen alpha-1(II) chain, transcript variant X2	0	0.01	0.06	0.01	0.06	0.02	0.02	0	0.04	0.05	0.01	0.02	0.023333	0.03	0.02	0.026667
rna-XM_010732097.3	gene-LOC104919960	LOC104919960	cell division cycle-associated protein 7, transcript variant X1	0	0.1	0	0	0	0	0	0	0	0	0	0.04	0.033333	0	0	0.013333
rna-XM_027279427.1	gene-LOC104919960	LOC104919960	cell division cycle-associated protein 7, transcript variant X2	0	0	0	0	0	0	0	0	0	0	0	0	0	0	0	0
rna-XM_027279428.1	gene-LOC104919960	LOC104919960	cell division cycle-associated protein 7, transcript variant X3	0	0	0	0	0	0	0	0	0.09	0	0	0	0	0	0.03	0
rna-XM_027278814.1	gene-LOC104919967	LOC104919967	sterol O-acyltransferase 1, transcript variant X1	0	0	0	0	0	0	0	0	0	0	0	0	0	0	0	0
rna-XR_003462409.1	gene-LOC104919967	LOC104919967	sterol O-acyltransferase 1, transcript variant X2	0	0	0	0	0	0	0	0.02	0	0	0	0	0	0	0.006667	0
rna-XM_019268669.2	gene-LOC104919972	LOC104919972	zinc finger E-box-binding homeobox 2	0.18	0.04	0.23	0	0.09	0.17	0.2	0.09	0.17	0.08	0.09	0.12	0.15	0.086667	0.153333	0.096667
rna-XM_019268668.2	gene-LOC104919974	LOC104919974	inhibin beta B chain	0	0	0	0	0	0.03	0	0.02	0	0	0	0	0	0.01	0.006667	0
rna-XM_010732120.3	gene-LOC104919975	LOC104919975	uncharacterized LOC104919975	0.01	0	0.02	0.05	0	0.03	0	0.01	0.01	0	0.04	0.01	0.01	0.026667	0.006667	0.016667
rna-XM_010732122.3	gene-LOC104919979	LOC104919979	cytochrome c oxidase subunit NDUFA4	0.24	0	0	0	0	0	0	0	0	0	0	0	0.08	0	0	0
rna-XM_010732133.3	gene-LOC104919989	LOC104919989	thiosulfate:glutathione sulfurtransferase, transcript variant X2	35.85	42.05	49.67	28.74	26.28	24.85	30.73	30.19	40.25	27.69	26.02	33.44	42.5233	26.6233	33.7233	29.05
rna-XM_027283203.1	gene-LOC104919989	LOC104919989	thiosulfate:glutathione sulfurtransferase, transcript variant X1	0	0	0	0	0	0	0	0.54	0	0	0	0.25	0	0	0.18	0.083333
rna-XM_019253538.2	gene-LOC104919991	LOC104919991	coagulation factor VIII	7.98	10.2	6.11	16.44	16.07	7.79	8.65	8.8	7.51	9.98	22.93	28	8.09667	13.4333	8.32	20.3033
rna-XM_010732136.3	gene-LOC104919992	LOC104919992	MORC family CW-type zinc finger protein 3	42.61	39.52	33.4	32.66	36.08	36.09	37.89	40.94	42.67	37.9	37.61	34.16	38.51	34.9433	40.5	36.5567
rna-XM_019253527.2	gene-LOC104919993	LOC104919993	phosphoethanolamine N-methyltransferase 3, transcript variant X1	0	0	0	0	0	0	0	0	0	0	0.32	0.23	0	0	0	0.183333
rna-XM_019253528.2	gene-LOC104919993	LOC104919993	phosphoethanolamine N-methyltransferase 3, transcript variant X2	0	0	0	0.37	0	0.1	0.28	0	0.11	0.29	0	0	0	0.156667	0.13	0.096667
rna-XM_019253529.2	gene-LOC104919993	LOC104919993	phosphoethanolamine N-methyltransferase 3, transcript variant X3	0	0	0.17	0	0.37	0.31	0.28	0.39	0.5	0.15	0	0	0.056667	0.226667	0.39	0.05
rna-XM_027282057.1	gene-LOC104919993	LOC104919993	phosphoethanolamine N-methyltransferase 3, transcript variant X4	1.94	2.04	1.81	0.99	0.65	0.91	1.56	1.19	0.85	1.52	0	2.64	1.93	0.85	1.2	1.38667
rna-XM_027282058.1	gene-LOC104919993	LOC104919993	phosphoethanolamine N-methyltransferase 3, transcript variant X5	0	0.29	0	0	0.18	0	0	0	0	0	1.03	0	0.096667	0.06	0	0.343333
rna-XM_027281906.1	gene-LOC104919995	LOC104919995	probable E3 ubiquitin-protein ligase MID2, transcript variant X1	0.42	0.29	0.63	0.13	0.86	0.86	0.33	0.41	0.64	0.21	0.36	0.5	0.446667	0.616667	0.46	0.356667
rna-XM_027281909.1	gene-LOC104919995	LOC104919995	probable E3 ubiquitin-protein ligase MID2, transcript variant X2	0	0	0	0.23	0	0	0	0	0.14	0	0	0	0	0.076667	0.046667	0
rna-XM_027281912.1	gene-LOC104919995	LOC104919995	probable E3 ubiquitin-protein ligase MID2, transcript variant X3	0	0	0	0	0	0	0	0	0	0	0	0	0	0	0	0
rna-XM_027281913.1	gene-LOC104919995	LOC104919995	probable E3 ubiquitin-protein ligase MID2, transcript variant X4	0.56	0.64	0.43	0.84	0.32	0.7	1.07	0.87	0.56	1.27	0.93	0.48	0.543333	0.62	0.833333	0.893333
rna-XM_010732141.3	gene-LOC104919996	LOC104919996	TSC22 domain family protein 3, transcript variant X2	71.38	65.64	84.23	75.01	98.78	117.09	65.74	80.8	101.21	78.84	63.69	56.39	73.75	96.96	82.5833	66.3067
rna-XM_019265419.2	gene-LOC104919996	LOC104919996	TSC22 domain family protein 3, transcript variant X1	5.38	6.17	10	6.21	6.21	10.8	8.04	6.75	7.39	7.62	7.61	5.22	7.18333	7.74	7.39333	6.81667
rna-XM_010732144.2	gene-LOC104919997	LOC104919997	kelch-like protein 4, transcript variant X2	0.9	1.04	0.85	1.21	1.92	1.66	1.11	1.24	1.29	1.78	1.53	1.4	0.93	1.59667	1.21333	1.57
rna-XM_019265438.2	gene-LOC104919997	LOC104919997	kelch-like protein 4, transcript variant X1	0.31	0.3	0.21	0.32	0.22	0.6	0.37	0.06	0.14	0.65	0.26	0.16	0.273333	0.38	0.19	0.356667
rna-XM_010732147.3	gene-LOC104920000	LOC104920000	hypothetical protein, transcript variant X1	3.39	1.68	2.81	2.72	1.76	1.84	3.21	2.17	2.81	2.16	2.58	2.19	2.62667	2.10667	2.73	2.31
rna-XM_027279545.1	gene-LOC104920000	LOC104920000	hypothetical protein, transcript variant X2	0	0	0	0	0	0	0	0	0	0	0	0	0	0	0	0
rna-XM_027289275.1	gene-LOC104920001	LOC104920001	type 2 DNA topoisomerase 6 subunit B-like, transcript variant X1	0	0	0	0	0	0.13	0	0	0.25	0.2	0	0	0	0.043333	0.083333	0.066667
rna-XM_027289306.1	gene-LOC104920001	LOC104920001	type 2 DNA topoisomerase 6 subunit B-like, transcript variant X2	0	0.07	0	0.09	0.23	0	0.16	0.08	0	0	0	0.11	0.023333	0.106667	0.08	0.036667
rna-XM_027289336.1	gene-LOC104920001	LOC104920001	type 2 DNA topoisomerase 6 subunit B-like, transcript variant X3	0	0	0.19	0.14	0	0.27	0	0.73	0.27	0	0.19	0.14	0.063333	0.136667	0.333333	0.11
rna-XM_010732149.3	gene-LOC104920002	LOC104920002	monocarboxylate transporter 8	0.66	0.67	0.44	0.82	0.67	0.87	0.47	0.61	0.59	0.56	0.76	0.71	0.59	0.786667	0.556667	0.676667
rna-XM_010732153.3	gene-LOC104920003	LOC104920003	cullin-4B	15.49	13.59	16.38	15.5	14.66	13.56	16.73	15.88	15.66	14.57	15.72	16.27	15.1533	14.5733	16.09	15.52
rna-XM_019265424.2	gene-LOC104920004	LOC104920004	protocadherin-11 X-linked, transcript variant X1	0	0	0	0.01	0	0	0	0	0	0	0	0	0	0.003333	0	0
rna-XM_019265425.2	gene-LOC104920004	LOC104920004	protocadherin-11 X-linked, transcript variant X2	0	0	0	0	0	0	0	0	0.03	0	0	0	0	0	0.01	0
rna-XM_027283875.1	gene-LOC104920006	LOC104920006	neuronal acetylcholine receptor subunit alpha-7, transcript variant X1	0	0	0	0	0	0	0	0	0	0	0	0	0	0	0	0
rna-XM_027283899.1	gene-LOC104920006	LOC104920006	neuronal acetylcholine receptor subunit alpha-7, transcript variant X2	0	0	0	0	0	0	0	0	0	0	0	0	0	0	0	0
rna-XM_027283941.1	gene-LOC104920006	LOC104920006	neuronal acetylcholine receptor subunit alpha-7, transcript variant X3	0.12	0.07	0.05	0.13	0.02	0	0	0	0	0.02	0.07	0	0.08	0.05	0	0.03
rna-XM_027273249.1	gene-LOC104920009	LOC104920009	gamma-aminobutyric acid receptor subunit beta-4, transcript variant X1	0	0	0	0	0	0	0	0	0	0	0	0	0	0	0	0
rna-XM_027273250.1	gene-LOC104920009	LOC104920009	gamma-aminobutyric acid receptor subunit beta-4, transcript variant X2	0	0	0	0	0	0	0	0	0	0	0	0	0	0	0	0
rna-XM_027273251.1	gene-LOC104920009	LOC104920009	gamma-aminobutyric acid receptor subunit beta-4, transcript variant X3	0	0	0	0	0	0	0	0	0	0	0	0	0	0	0	0
rna-XM_019278903.2	gene-LOC104920011	LOC104920011	ras-specific guanine nucleotide-releasing factor 1	0.07	0.02	0.12	0.16	0.1	0.11	0.04	0.08	0.06	0.05	0.12	0.03	0.07	0.123333	0.06	0.066667
rna-XM_027273388.1	gene-LOC104920016	LOC104920016	transmembrane protein 88-like	8.04	7.02	6.16	9.27	14.5	12.8	11.37	9.06	10.6	13.54	12.34	7.86	7.07333	12.19	10.3433	11.2467
[truncated: 49,739 more rows]
