# Supplementary material for: Comparative Transcriptomics Reveals the microRNA-Mediated Immune Response of Large Yellow Croaker (Larimichthys crocea) to Pseudomonas plecoglossicida Infection
Source: MDPI journal article supplement (doi:10.3390/fishes8010010), 2022-12-23
Supplement: s1 [file s1 › Table S7.xlsx]

## Sheet: Table S7
Table S7 Overview information of DEmRNA at 12h
Transcript_ID	Gene_ID	Gene name	Gene description	FC(PP1/PBS1)	P value	Regulation	PBS1_1	PBS1_2	PBS1_3	PP1_1	PP1_2	PP1_3	PBS1	PP1
rna-XM_010741270.3	gene-LOC104927238	LOC104927238	thrombomodulin	1.668	4.95e-05	up	21.4	18.72	21.13	33.02	35.77	35.66	20.4167	34.8167
rna-XM_027291479.1	gene-LOC104940083	LOC104940083	uncharacterized LOC104940083, transcript variant X2	1469.9	9.85e-05	up	0	0	0	2.58	1.93	4.44	0	2.98333
rna-XM_019259517.2	gene-gne	gne	glucosamine (UDP-N-acetyl)-2-epimerase/N-acetylmannosamine kinase, transcript variant X1	327.704	0.000135362	up	0	0	0	0.74	0.72	0.28	0	0.58
rna-XM_027276178.1	gene-zbtb1	zbtb1	zinc finger and BTB domain containing 1, transcript variant X2	1491.99	0.000153777	up	0	0	0	4.35	2.4	1.67	0	2.80667
rna-XM_019256483.2	gene-slc2a4rg	slc2a4rg	SLC2A4 regulator, transcript variant X1	3.098	0.000160349	up	0.61	0.55	0.66	2.09	2.06	1.61	0.606667	1.92
rna-XM_027285669.1	gene-LOC104927416	LOC104927416	peroxiredoxin-6	1.511	0.000304248	up	21.04	21.13	20.17	31.57	32.66	31.9	20.78	32.0433
rna-XM_027279823.1	gene-LOC104939122	LOC104939122	death-inducer obliterator 1, transcript variant X5	549.21	0.000343077	up	0	0	0	0.39	0.59	0.45	0	0.476667
rna-XR_003463700.1	gene-LOC104938872	LOC104938872	insulin receptor substrate 2-B, transcript variant X2	1075.47	0.000343534	up	0	0	0	0.77	1.58	0.51	0	0.953333
rna-XM_019277690.2	gene-kdr	kdr	kinase insert domain receptor, transcript variant X2	1.669	0.000403143	up	7.2	8.62	7.51	13.26	12.47	14.21	7.77667	13.3133
rna-XM_019262196.2	gene-LOC104919225	LOC104919225	glypican-1	2.838	0.000419161	up	1.35	1.16	1.51	3.72	4.96	3	1.34	3.89333
rna-XM_027290752.1	gene-LOC104932497	LOC104932497	interferon alpha/beta receptor 1a, transcript variant X5	851.076	0.000433922	up	0	0	0	1.5	4.84	3.08	0	3.14
rna-XM_019265895.2	gene-LOC104935895	LOC104935895	myc-associated zinc finger protein, transcript variant X2	450.284	0.000478922	up	0	0	0	0.97	1.11	1.14	0	1.07333
rna-XM_027281103.1	gene-LOC104932418	LOC104932418	USP6 N-terminal-like protein, transcript variant X1	531.053	0.000511745	up	0	0	0	0.89	1.74	1	0	1.21
rna-XM_019254971.2	gene-kif2a	kif2a	kinesin family member 2A, transcript variant X3	143.408	0.000584753	up	0	0	0	0.6	0.62	0.54	0	0.586667
rna-XM_027275233.1	gene-ift52	ift52	intraflagellar transport 52, transcript variant X2	631.854	0.000608027	up	0	0	0	2.49	1.85	5.24	0	3.19333
rna-XM_019278703.2	gene-sbno1	sbno1	strawberry notch homolog 1, transcript variant X5	115.255	0.000666176	up	0	0	0.11	2.73	6.15	4.84	0.0366667	4.57333
rna-XM_010748978.3	gene-LOC104933502	LOC104933502	regulator of G-protein signaling 5	1.98	0.000701278	up	30.37	22.95	21.59	47.93	43.87	59.18	24.97	50.3267
rna-XM_019275180.2	gene-LOC104924790	LOC104924790	zinc finger and BTB domain-containing protein 18.2, transcript variant X2	1.944	0.000788179	up	1.7	1.79	2.26	3.87	4.09	3.5	1.91667	3.82
rna-XM_010742094.3	gene-LOC104927908	LOC104927908	membrane-associated guanylate kinase, WW and PDZ domain-containing protein 1, transcript variant X8	123.209	0.000792089	up	0.01	0	0	0.45	0.34	0.39	0.00333333	0.393333
rna-XM_027281464.1	gene-LOC104932561	LOC104932561	CD99 antigen, transcript variant X4	1.665	0.000888366	up	4.75	5	4.43	8.81	8.19	7.17	4.72667	8.05667
rna-XM_019268917.2	gene-thsd7b	thsd7b	thrombospondin type 1 domain containing 7B, transcript variant X2	371.857	0.000903031	up	0	0	0	0.41	0.39	0.26	0	0.353333
rna-XM_010751537.3	gene-LOC104935666	LOC104935666	uncharacterized LOC104935666	1234.72	0.00100887	up	0	0	0	3.32	3.73	14.94	0	7.33
rna-XM_019264115.2	gene-kmt2a	kmt2a	lysine methyltransferase 2A, transcript variant X2	1.8	0.0010295	up	0.98	0.79	0.75	1.67	1.64	1.33	0.84	1.54667
rna-XM_027291434.1	gene-LOC104931301	LOC104931301	fas apoptotic inhibitory molecule 1, transcript variant X1	591.949	0.00113104	up	0	0	0	1.3	1.63	4.75	0	2.56
rna-XM_027278626.1	gene-nadk2	nadk2	NAD kinase 2, mitochondrial, transcript variant X4	357.376	0.00125169	up	0	0	0	1.32	0.57	0.86	0	0.916667
rna-XM_027282330.1	gene-myh11	myh11	myosin heavy chain 11, transcript variant X1	5.169	0.00136331	up	0.8	0.27	0.47	2.37	1.93	3.78	0.513333	2.69333
rna-XM_027291146.1	gene-heg1	heg1	heart development protein with EGF like domains 1	1.625	0.00138992	up	4.32	3.47	3.29	5.66	6.19	6.55	3.69333	6.13333
rna-XM_010737758.3	gene-adam23	adam23	ADAM metallopeptidase domain 23, transcript variant X1	1.529	0.00139444	up	9.56	7.37	7.71	13.88	12.24	12.34	8.21333	12.82
rna-XM_027281656.1	gene-itm2a	itm2a	integral membrane protein 2A, transcript variant X1	1.523	0.00139648	up	12.89	14.95	13.71	20.12	20.72	23.98	13.85	21.6067
rna-XM_010746112.3	gene-LOC104931173	LOC104931173	glutathione hydrolase 5 proenzyme	1.781	0.0014704	up	10.97	8.1	8.73	19.3	16.97	14.21	9.26667	16.8267
rna-XM_010740259.3	gene-acot7	acot7	acyl-CoA thioesterase 7, transcript variant X2	106.481	0.00151113	up	0.01	0	0	1.09	0.71	0.52	0.00333333	0.773333
rna-XM_019254922.2	gene-relch	relch	RAB11 binding and LisH domain, coiled-coil and HEAT repeat containing, transcript variant X2	312.564	0.00151728	up	0	0	0	0.69	0.39	0.36	0	0.48
rna-XM_010752161.3	gene-LOC104936178	LOC104936178	serine/arginine-rich splicing factor 6, transcript variant X1	3.61	0.00166354	up	0.94	0.96	0.76	2.57	3.32	3.99	0.886667	3.29333
rna-XM_027274511.1	gene-LOC113744544	LOC113744544	uncharacterized LOC113744544, transcript variant X2	262.983	0.00167081	up	0	0	0	2.53	3.06	3.23	0	2.94
rna-XM_027286351.1	gene-LOC109142801	LOC109142801	uncharacterized LOC109142801, transcript variant X1	347.87	0.00187325	up	0	0	0	0.98	0.72	0.29	0	0.663333
rna-XM_027272845.1	gene-LOC104937694	LOC104937694	liprin-beta-1, transcript variant X4	108.506	0.00194202	up	0.02	0	0	1.24	0.29	0.87	0.00666667	0.8
rna-XM_019261733.2	gene-LOC104923163	LOC104923163	serine/arginine repetitive matrix protein 1	2.422	0.00206725	up	0.61	0.89	0.79	1.85	1.84	2.01	0.763333	1.9
rna-XM_027281699.1	gene-mybpc3	mybpc3	myosin binding protein C, cardiac, transcript variant X5	3.302	0.00208752	up	0.88	1.08	0.5	2.78	2.27	3.3	0.82	2.78333
rna-XM_019264394.2	gene-LOC104920650	LOC104920650	protein transport protein Sec24C, transcript variant X1	3.043	0.00214258	up	1.08	2.07	1.16	4.78	3.52	5.24	1.43667	4.51333
rna-XM_019259794.2	gene-pqlc1	pqlc1	PQ loop repeat containing 1, transcript variant X4	235.04	0.00217057	up	0	0	0	0.39	0.55	0.53	0	0.49
rna-XM_010742538.3	gene-ap1s2	ap1s2	adaptor related protein complex 1 subunit sigma 2, transcript variant X6	2.395	0.00223364	up	1.4	1.23	1.12	3.43	3.28	2.47	1.25	3.06
rna-XM_027283258.1	gene-sugt1	sugt1	SGT1 homolog, MIS12 kinetochore complex assembly cochaperone, transcript variant X3	1.697	0.00228672	up	8.94	7.58	6.46	11.92	14.19	13.71	7.66	13.2733
rna-XM_010736285.3	gene-LOC104923242	LOC104923242	hypothetical protein, transcript variant X2	2.37	0.00230977	up	3.52	2.95	2.35	6.81	7.35	7.14	2.94	7.1
rna-XM_027291695.1	gene-LOC104938462	LOC104938462	protein Shroom2, transcript variant X7	295.217	0.00233843	up	0	0	0	0.45	0.17	0.56	0	0.393333
rna-XM_019259204.2	gene-tmem154	tmem154	transmembrane protein 154, transcript variant X3	1.756	0.00251978	up	20.92	18.82	17.57	30.36	28.79	43.71	19.1033	34.2867
rna-XM_010729802.3	gene-LOC104918156	LOC104918156	receptor activity-modifying protein 3	1.634	0.00253162	up	2.72	2.35	2.18	3.94	3.99	4.19	2.41667	4.04
rna-XM_010741550.3	gene-LOC104927466	LOC104927466	cGMP-dependent protein kinase 1, transcript variant X1	1.59	0.00270812	up	1.86	1.86	1.7	2.84	2.77	3.23	1.80667	2.94667
rna-XM_027287726.1	gene-chd3	chd3	chromodomain helicase DNA binding protein 3, transcript variant X4	1.574	0.0027723	up	1.29	1.41	1.37	2.01	2.17	2.39	1.35667	2.19
rna-XM_027272925.1	gene-fam107b	fam107b	family with sequence similarity 107 member B, transcript variant X3	216.397	0.00288982	up	0	0	0	0.75	0.68	1.28	0	0.903333
rna-XM_027277380.1	gene-LOC104923458	LOC104923458	transcriptional activator protein Pur-beta	2.074	0.00292175	up	3.38	3.56	2.32	7.76	5.36	6.53	3.08667	6.55
rna-XM_019272166.2	gene-dennd1a	dennd1a	DENN domain containing 1A, transcript variant X1	220.798	0.00303099	up	0	0	0	0.27	0.36	0.16	0	0.263333
rna-XM_019273469.2	gene-ddx54	ddx54	DEAD-box helicase 54, transcript variant X3	1.596	0.00306662	up	7.85	9.21	7.16	11.86	12.56	15.23	8.07333	13.2167
rna-XM_019273867.2	gene-LOC109141879	LOC109141879	membrane cofactor protein-like, transcript variant X1	1.758	0.0031062	up	9.07	11.03	7.34	14.62	17.82	16.98	9.14667	16.4733
rna-XM_027289517.1	gene-tcf7l2	tcf7l2	transcription factor 7 like 2, transcript variant X25	65.429	0.00317799	up	0	0	0	0.21	0.45	0.2	0	0.286667
rna-XM_019262297.2	gene-LOC104924845	LOC104924845	midnolin-A, transcript variant X1	6.673	0.00318803	up	2.77	0.73	1.57	7.66	7.15	19.53	1.69	11.4467
rna-XM_010737625.3	gene-myo1e	myo1e	myosin IE, transcript variant X1	194.893	0.00320063	up	0	0	0	0.22	0.26	0.36	0	0.28
rna-XM_019253814.2	gene-LOC104925464	LOC104925464	G-box-binding factor	1.522	0.00332668	up	5.42	4.84	4.94	8.16	6.62	8.89	5.06667	7.89
rna-XM_027287775.1	gene-shroom4	shroom4	shroom family member 4, transcript variant X2	194.621	0.00338081	up	0	0	0	0.14	0.26	0.18	0	0.193333
rna-XM_019252915.2	gene-arhgap12	arhgap12	Rho GTPase activating protein 12, transcript variant X5	332.825	0.0034182	up	0	0	0	0.16	0.75	0.96	0	0.623333
rna-XM_027273818.1	gene-LOC104936459	LOC104936459	periostin, transcript variant X2	219.038	0.00357158	up	0	0	0	0.68	0.55	0.24	0	0.49
rna-XM_010740729.3	gene-LOC104926791	LOC104926791	complement factor D	1.554	0.0036429	up	210.35	267.01	202.36	394.98	339.36	344.01	226.573	359.45
rna-XM_010739036.3	gene-rap1gap2	rap1gap2	RAP1 GTPase activating protein 2, transcript variant X3	87.153	0.00384178	up	0.01	0	0	0.47	0.1	0.62	0.00333333	0.396667
rna-XM_019277816.2	gene-LOC104918561	LOC104918561	collagen alpha-1(XI) chain, transcript variant X1	1.731	0.00405872	up	1.15	1.45	1.48	2.3	2.29	2.67	1.36	2.42
rna-XM_010739292.3	gene-fgfr2	fgfr2	fibroblast growth factor receptor 2, transcript variant X4	194.583	0.00408806	up	0	0	0	0.22	0.23	0.52	0	0.323333
id-LOC113746502	gene-LOC113746502	LOC113746502	Ig kappa chain V region 3381-like	1.624	0.00413683	up	790.16	1069.65	820.99	1326.71	1378.48	1654.22	893.6	1453.14
rna-XM_027282589.1	gene-LOC104933484	LOC104933484	fibrous sheath CABYR-binding protein, transcript variant X4	188.785	0.00421098	up	0	0	0	0.2	0.49	0.26	0	0.316667
rna-XM_027285460.1	gene-LOC104919210	LOC104919210	long-chain-fatty-acid--CoA ligase 3, transcript variant X4	160.042	0.00424398	up	0	0	0	0.24	0.21	0.19	0	0.213333
rna-XM_027291267.1	gene-LOC104932388	LOC104932388	sentrin-specific protease 7, transcript variant X6	386.339	0.004283	up	0	0	0	1.35	0.18	0.36	0	0.63
rna-XM_027286781.1	gene-gpnmb	gpnmb	glycoprotein nmb, transcript variant X2	210.651	0.00433082	up	0	0	0	0.22	0.7	0.29	0	0.403333
rna-XM_027278627.1	gene-nadk2	nadk2	NAD kinase 2, mitochondrial, transcript variant X6	256.552	0.00433898	up	0	0	0	0.48	1.25	0.26	0	0.663333
rna-XM_010736668.3	gene-hic1	hic1	HIC ZBTB transcriptional repressor 1, transcript variant X2	2.111	0.00446402	up	0.55	0.94	0.83	1.62	1.94	1.49	0.773333	1.68333
rna-XM_019258712.2	gene-znf652	znf652	zinc finger protein 652, transcript variant X2	152.204	0.00460027	up	0	0	0	0.18	0.22	0.19	0	0.196667
rna-XM_027289409.1	gene-slc16a3	slc16a3	solute carrier family 16 member 3, transcript variant X2	160.66	0.0046276	up	0	0	0	0.29	0.49	0.51	0	0.43
rna-XM_010739329.3	gene-LOC104925655	LOC104925655	deleted in malignant brain tumors 1 protein-like, transcript variant X2	1.547	0.00475893	up	10.99	10.06	10.96	15.42	14.23	21.09	10.67	16.9133
rna-XM_027291389.1	gene-LOC104931308	LOC104931308	CLIP-associating protein 1-B-like, transcript variant X3	291.504	0.00493011	up	0	0	0	0.35	0.41	0.06	0	0.273333
rna-XM_019270588.2	gene-LOC109141161	LOC109141161	transmembrane protein 169, transcript variant X1	153.147	0.00493705	up	0	0	0	0.52	0.31	0.51	0	0.446667
rna-XM_027291036.1	gene-map3k13	map3k13	mitogen-activated protein kinase kinase kinase 13, transcript variant X1	164.353	0.00505841	up	0	0	0	0.22	0.23	0.1	0	0.183333
rna-XM_027272179.1	gene-LOC104918796	LOC104918796	voltage-dependent calcium channel subunit alpha-2/delta-1, transcript variant X3	300.401	0.00517641	up	0	0	0	0.15	0.14	0.77	0	0.353333
rna-XM_019258654.2	gene-LOC104926310	LOC104926310	gap junction gamma-1 protein, transcript variant X1	1.715	0.00520683	up	2.74	2.37	1.74	3.51	4.18	4.32	2.28333	4.00333
rna-XR_003463722.1	gene-dthd1	dthd1	death domain containing 1, transcript variant X2	137.767	0.00529655	up	0	0	0	0.29	0.33	0.31	0	0.31
rna-XM_027289123.1	gene-LOC109138279	LOC109138279	uncharacterized LOC109138279, transcript variant X3	12.516	0.00530116	up	0.13	0.12	0.05	0.63	1.81	1.58	0.1	1.34
rna-XM_027279028.1	gene-tmem128	tmem128	transmembrane protein 128, transcript variant X2	2.656	0.00530572	up	1.72	1.39	1.19	4.25	3.64	3.76	1.43333	3.88333
rna-XM_019277993.2	gene-numb	numb	NUMB, endocytic adaptor protein, transcript variant X7	2.874	0.0054809	up	0.48	0.82	1.07	2.11	2.51	2.4	0.79	2.34
rna-XM_027284614.1	gene-stum	stum	stum, mechanosensory transduction mediator homolog	1.82	0.00553225	up	2.21	2.09	2.32	3.41	3.66	5.29	2.20667	4.12
rna-XM_027275021.1	gene-dtnb	dtnb	dystrobrevin beta, transcript variant X6	150.534	0.00556785	up	0	0	0	0.33	0.17	0.17	0	0.223333
rna-XM_027286198.1	gene-LOC104922748	LOC104922748	retinoic acid receptor RXR-beta-A-like, transcript variant X2	5.518	0.00556909	up	0.44	0.26	0.69	4.08	1.18	2.6	0.463333	2.62
rna-XM_027282614.1	gene-LOC104923158	LOC104923158	amyloid-beta A4 precursor protein-binding family B member 2, transcript variant X8	165.56	0.00559083	up	0	0	0	0.16	0.32	0.11	0	0.196667
rna-XM_010729992.3	gene-LOC104918290	LOC104918290	rho GTPase-activating protein 21, transcript variant X1	407.761	0.00563383	up	0	0	0	1.25	0.03	0.06	0	0.446667
rna-XM_027276760.1	gene-LOC109136654	LOC109136654	E3 ubiquitin-protein ligase TRIM39-like	1.675	0.00565559	up	4.96	5.47	5.65	9.94	8.67	8.92	5.36	9.17667
rna-XM_019263058.2	gene-rcbtb1	rcbtb1	RCC1 and BTB domain containing protein 1, transcript variant X1	142.781	0.00569844	up	0	0	0	0.59	0.31	0.38	0	0.426667
rna-XM_019253185.2	gene-rnf145	rnf145	ring finger protein 145	1.551	0.00572848	up	3.95	3.99	3.79	4.91	7.37	6.36	3.91	6.21333
rna-XM_010748676.3	gene-LOC104933269	LOC104933269	phosphatidylinositol 4,5-bisphosphate 3-kinase catalytic subunit alpha isoform	1.857	0.0057326	up	1.38	1.46	2.11	3.05	2.6	3.78	1.65	3.14333
rna-XM_027289585.1	gene-rara	rara	retinoic acid receptor alpha, transcript variant X13	140.578	0.00576231	up	0	0	0	0.14	0.26	0.24	0	0.213333
rna-XM_027276412.1	gene-LOC113744046	LOC113744046	cold shock domain-containing protein E1-like, transcript variant X9	192.046	0.00577568	up	0	0	0	0.59	0.47	0.13	0	0.396667
rna-XR_797188.3	gene-pdgfa	pdgfa	platelet derived growth factor subunit A, transcript variant X1	142.369	0.00580372	up	0	0	0	0.34	0.69	0.44	0	0.49
rna-XM_019267140.2	gene-LOC104917715	LOC104917715	mucolipin-3, transcript variant X1	143.464	0.00589176	up	0	0	0	0.39	0.34	0.71	0	0.48
rna-XM_027277486.1	gene-hdac4	hdac4	histone deacetylase 4, transcript variant X3	289.569	0.00591561	up	0	0	0	0.12	0.54	0.08	0	0.246667
rna-XM_010733345.3	gene-wls	wls	Wnt ligand secretion mediator, transcript variant X1	214.868	0.00593866	up	0.01	0	0.01	1.83	0.03	5.22	0.00666667	2.36
rna-XM_027276028.1	gene-LOC113744903	LOC113744903	rho-related GTP-binding protein RhoG-like	2.519	0.00619016	up	7.31	9.73	10.47	24.51	15.77	30.17	9.17	23.4833
rna-XM_019253074.2	gene-mecom	mecom	MDS1 and EVI1 complex locus, transcript variant X2	120.661	0.00646451	up	0	0	0	0.13	0.17	0.14	0	0.146667
rna-XM_027280257.1	gene-slc33a1	slc33a1	solute carrier family 33 member 1, transcript variant X4	122.29	0.0064792	up	0	0	0	0.18	0.25	0.27	0	0.233333
rna-XM_027284104.1	gene-LOC104936893	LOC104936893	filamin-C, transcript variant X8	2.154	0.00675173	up	0.38	0.35	0.48	0.77	0.78	1.12	0.403333	0.89
rna-XM_019275401.2	gene-trit1	trit1	tRNA isopentenyltransferase 1, transcript variant X2	146.879	0.00675912	up	0	0	0	0.27	0.54	0.89	0	0.566667
rna-XM_019272247.2	gene-dennd4a	dennd4a	DENN domain containing 4A, transcript variant X1	414.739	0.00679414	up	0	0	0	1.23	0.18	0.12	0	0.51
rna-XM_010736246.3	gene-LOC104923213	LOC104923213	apelin receptor B	1.548	0.00680981	up	24.48	20.66	16.92	28.53	31.22	38.32	20.6867	32.69
rna-XM_010742886.3	gene-LOC104928577	LOC104928577	protein spinster homolog 2, transcript variant X2	1.546	0.00704312	up	10.51	13.41	9.06	17.98	15.99	18.33	10.9933	17.4333
rna-XM_019278598.2	gene-LOC104920469	LOC104920469	USP6 N-terminal-like protein, transcript variant X2	1.88	0.00707587	up	1.85	2.76	2.46	5.25	4.78	3.61	2.35667	4.54667
rna-XM_027287813.1	gene-arhgef11	arhgef11	Rho guanine nucleotide exchange factor 11, transcript variant X7	192.827	0.0070848	up	0	0	0	0.07	0.33	0.08	0	0.16
rna-XM_027285408.1	gene-LOC104934335	LOC104934335	transportin-2, transcript variant X3	118.822	0.00708923	up	0	0	0	0.12	0.17	0.09	0	0.126667
rna-XR_003463004.1	gene-herc3	herc3	HECT and RLD domain containing E3 ubiquitin protein ligase 3, transcript variant X2	143.219	0.00709854	up	0	0	0	0.17	0.29	0.57	0	0.343333
rna-XM_027284361.1	gene-LOC104939981	LOC104939981	coiled-coil domain-containing protein 180, transcript variant X1	120.072	0.00716147	up	0	0	0	0.18	0.28	0.14	0	0.2
rna-XM_010751661.3	gene-LOC104935773	LOC104935773	T cell leukemia homeobox 1, transcript variant X1	1.614	0.00731993	up	5.39	4.4	4.61	6.34	7.54	9.89	4.8	7.92333
rna-XM_027278129.1	gene-LOC104931162	LOC104931162	GDNF family receptor alpha-1, transcript variant X2	3.983	0.00732063	up	0.37	0.2	0.51	2.26	0.93	1.23	0.36	1.47333
rna-XM_010744116.3	gene-mrc1	mrc1	mannose receptor C-type 1	3.378	0.00750017	up	0.57	1	0.53	2.81	3.23	1.26	0.7	2.43333
rna-XM_027290224.1	gene-cfh	cfh	complement factor H	2.936	0.00760702	up	3.48	5.95	7.73	23.9	10.03	17.88	5.72	17.27
rna-XM_019262058.2	gene-wdr47	wdr47	WD repeat domain 47, transcript variant X3	135.478	0.00768457	up	0	0	0	0.48	0.17	0.2	0	0.283333
rna-XM_027275553.1	gene-LOC113744734	LOC113744734	uncharacterized LOC113744734, transcript variant X2	130.971	0.0077711	up	0	0	0	0.49	0.37	0.16	0	0.34
rna-XM_019261988.2	gene-LOC104928201	LOC104928201	disks large-associated protein 1, transcript variant X5	105.688	0.00789459	up	0	0	0	0.1	0.06	0.07	0	0.0766667
rna-XM_019264497.2	gene-letm2	letm2	leucine zipper and EF-hand containing transmembrane protein 2, transcript variant X1	2.684	0.00796974	up	0.88	0.62	1.33	1.97	2.33	3.47	0.943333	2.59
rna-XM_019267919.2	gene-LOC104925199	LOC104925199	tudor domain-containing protein 7B, transcript variant X1	103.729	0.00805127	up	0	0	0	0.11	0.16	0.13	0	0.133333
rna-XM_010742229.3	gene-LOC104928019	LOC104928019	cAMP-dependent protein kinase type II-alpha regulatory subunit, transcript variant X2	43.027	0.00808326	up	0.17	0	0	3.52	1.6	2.48	0.0566667	2.53333
rna-XM_027291383.1	gene-LOC104928558	LOC104928558	uncharacterized LOC104928558, transcript variant X6	1.828	0.00828851	up	0.89	1.26	1.3	2.47	1.98	2.03	1.15	2.16
rna-XM_010744941.3	gene-LOC104930217	LOC104930217	RUN domain-containing protein 3A, transcript variant X5	107.709	0.0083988	up	0	0	0	0.64	0.36	0.76	0	0.586667
rna-XM_019263505.2	gene-itgb4	itgb4	integrin subunit beta 4, transcript variant X5	174.157	0.00848407	up	0	0	0	0.05	0.33	0.14	0	0.173333
rna-XM_010735358.3	gene-LOC104922520	LOC104922520	sperm acrosome membrane-associated protein 4	1.525	0.00849778	up	13.31	17.14	19.49	25.93	24.39	27.72	16.6467	26.0133
rna-XM_019275439.2	gene-ewsr1	ewsr1	EWS RNA binding protein 1, transcript variant X1	722.582	0.00852674	up	0	0	0	0.02	8.52	0.49	0	3.01
rna-XM_027272354.1	gene-LOC104938374	LOC104938374	Wilms tumor protein homolog, transcript variant X3	2.566	0.00865795	up	1.9	1.03	0.86	3.82	3.15	2.91	1.26333	3.29333
rna-XM_010731872.3	gene-scg3	scg3	secretogranin III, transcript variant X1	114.855	0.00871681	up	0	0	0	0.24	0.61	0.28	0	0.376667
rna-XM_027291348.1	gene-pept1	pept1	solute carrier family 15 member 1, transcript variant X1	102.98	0.00874337	up	0	0	0	0.26	0.39	0.2	0	0.283333
rna-XM_019269526.2	gene-LOC104918928	LOC104918928	zinc finger CCCH domain-containing protein 7B, transcript variant X1	2.319	0.00881479	up	0.28	0.43	0.46	1.06	0.94	0.77	0.39	0.923333
rna-XM_027280622.1	gene-canx	canx	calnexin, transcript variant X3	1.655	0.00890779	up	3.68	2.34	3.8	6.12	5.06	5.41	3.27333	5.53
rna-XM_019274471.2	gene-trpv4	trpv4	transient receptor potential cation channel subfamily V member 4	1.669	0.00890812	up	2.4	1.79	1.6	3.33	2.92	3.61	1.93	3.28667
rna-XM_010732802.3	gene-LOC104920520	LOC104920520	SLIT-ROBO Rho GTPase-activating protein 3, transcript variant X1	1.781	0.00892377	up	1.82	2.32	1.54	2.75	3.63	4.02	1.89333	3.46667
rna-XM_019256799.2	gene-LOC104924615	LOC104924615	fizzy-related protein homolog, transcript variant X6	129.355	0.00893943	up	0	0	0	0.73	0.18	0.52	0	0.476667
rna-XM_019262441.2	gene-kctd3	kctd3	potassium channel tetramerization domain containing 3, transcript variant X2	115.873	0.00899532	up	0	0	0	0.14	0.26	0	0	0.133333
rna-XM_019273775.2	gene-LOC104928638	LOC104928638	homeodomain-interacting protein kinase 1, transcript variant X1	283.634	0.00914449	up	0	0	0	0	0.55	0.79	0	0.446667
rna-XM_027288688.1	gene-ranbp9	ranbp9	RAN binding protein 9	1.638	0.00934123	up	1.34	1.67	1.56	2.31	3.02	2.36	1.52333	2.56333
rna-XM_010740637.3	gene-LOC104926710	LOC104926710	protein max, transcript variant X7	5.936	0.00937434	up	0.15	0.57	0.44	2.66	1.71	2.84	0.386667	2.40333
rna-XM_027273794.1	gene-LOC104935085	LOC104935085	RNA-binding protein 4, transcript variant X1	138.789	0.00937497	up	0	0	0	0.66	0.13	0.47	0	0.42
rna-XM_010745134.3	gene-sgpp1	sgpp1	sphingosine-1-phosphate phosphatase 1, transcript variant X1	353.431	0.00942054	up	0	0	0	0	0.89	1.42	0	0.77
rna-XM_027289233.1	gene-ascc1	ascc1	activating signal cointegrator 1 complex subunit 1, transcript variant X2	243.459	0.0094412	up	0	0	0	0.88	3.69	0.32	0	1.63
rna-XM_027274128.1	gene-rala	rala	RAS like proto-oncogene A, transcript variant X1	1.786	0.00962173	up	1.85	2.05	2.27	2.99	4.92	3.38	2.05667	3.76333
rna-XM_010738146.3	gene-LOC104924704	LOC104924704	copine-3-like, transcript variant X2	1.662	0.00972729	up	5.22	3.83	5.72	7.82	7.59	9.65	4.92333	8.35333
rna-XM_019277120.2	gene-LOC104922135	LOC104922135	disintegrin and metalloproteinase domain-containing protein 17, transcript variant X1	85.629	0.00986161	up	0	0	0	0.15	0.17	0.15	0	0.156667
rna-XM_019260661.2	gene-rrad	rrad	RRAD, Ras related glycolysis inhibitor and calcium channel regulator	1.818	0.0100573	up	4.62	8.2	6.53	12.6	12.1	11.41	6.45	12.0367
rna-XM_010738250.3	gene-akt1	akt1	AKT serine/threonine kinase 1, transcript variant X2	3.081	0.0100997	up	0.58	0.41	0.28	1.09	1.66	1.27	0.423333	1.34
rna-XR_003463535.1	gene-LOC104939468	LOC104939468	gastrula zinc finger protein XlCGF57.1, transcript variant X3	104.834	0.0101148	up	0	0	0	0.52	0.2	0.22	0	0.313333
rna-XM_019259209.2	gene-LOC104934204	LOC104934204	LIM and calponin homology domains-containing protein 1, transcript variant X4	110.45	0.0102027	up	0	0	0	0.06	0.21	0.09	0	0.12
rna-XM_010740092.3	gene-tnfaip6	tnfaip6	TNF alpha induced protein 6	1.516	0.0102765	up	6.28	5.57	6.11	8.84	9.14	9.8	5.98667	9.26
rna-XM_019255170.2	gene-chn2	chn2	chimerin 2, transcript variant X1	83.019	0.0102788	up	0	0	0	0.22	0.21	0.26	0	0.23
rna-XM_019272167.2	gene-dennd1a	dennd1a	DENN domain containing 1A, transcript variant X2	1.646	0.0102963	up	3.24	3.61	3.41	4.17	5.95	7.22	3.42	5.78
rna-XM_019266913.2	gene-LOC109140338	LOC109140338	BMP/retinoic acid-inducible neural-specific protein 3, transcript variant X3	95.781	0.0103758	up	0	0	0	0.31	0.29	0.13	0	0.243333
rna-XM_027278459.1	gene-rmi1	rmi1	RecQ mediated genome instability 1, transcript variant X2	204.42	0.0103904	up	0	0	0	0.91	0.07	0.5	0	0.493333
rna-XM_027285907.1	gene-LOC104926310	LOC104926310	gap junction gamma-1 protein, transcript variant X2	140.638	0.0104708	up	0	0	0	0.29	0.04	0.16	0	0.163333
rna-XM_019260160.2	gene-LOC104923906	LOC104923906	zinc finger and BTB domain-containing protein 6, transcript variant X3	104.286	0.0104989	up	0	0	0	0.23	0.72	0.35	0	0.433333
rna-XM_027272987.1	gene-rpl4	rpl4	ribosomal protein L4, transcript variant X2	2.054	0.0105871	up	82.32	86.81	78.39	153.51	109.64	257.22	82.5067	173.457
rna-XM_027279662.1	gene-LOC104939586	LOC104939586	inter-alpha-trypsin inhibitor heavy chain H3, transcript variant X2	1.683	0.0106202	up	2.47	2.59	2.98	4.55	5.6	3.7	2.68	4.61667
rna-XM_027282617.1	gene-LOC104923158	LOC104923158	amyloid-beta A4 precursor protein-binding family B member 2, transcript variant X11	2.002	0.0106603	up	0.85	0.62	0.57	1.69	1.13	1.34	0.68	1.38667
rna-XM_019255687.2	gene-LOC104919003	LOC104919003	UDP-glucuronosyltransferase 2A2, transcript variant X1	1.517	0.0106683	up	6.17	7.08	8.01	11.76	12	9.25	7.08667	11.0033
rna-XM_027286575.1	gene-LOC104938599	LOC104938599	regulating synaptic membrane exocytosis protein 2, transcript variant X13	84.989	0.0108286	up	0	0	0	0.18	0.09	0.13	0	0.133333
rna-XM_010751305.3	gene-LOC104935466	LOC104935466	translational activator of cytochrome c oxidase 1	1.76	0.0109257	up	5.44	3.65	3.96	7.89	8.32	7.15	4.35	7.78667
rna-XM_010744895.3	gene-ccar1	ccar1	cell division cycle and apoptosis regulator 1, transcript variant X2	1.609	0.0109465	up	6.69	4.23	5.58	9.83	9.91	7.33	5.5	9.02333
rna-XM_027274790.1	gene-LOC104926588	LOC104926588	single-stranded DNA-binding protein 3, transcript variant X2	139.714	0.0110859	up	0	0	0	0.12	0.5	0.1	0	0.24
rna-XM_010739344.3	gene-sgk1	sgk1	serum/glucocorticoid regulated kinase 1, transcript variant X3	1.648	0.0111642	up	3.35	4.18	2.65	5.71	5.52	5.96	3.39333	5.73
rna-XM_010739929.3	gene-LOC104926138	LOC104926138	toll-like receptor 5	2.636	0.011227	up	2.89	1.72	1.34	6.86	3.34	5.76	1.98333	5.32
rna-XM_010749598.3	gene-LOC104934034	LOC104934034	nuclear receptor subfamily 2 group F member 5, transcript variant X2	2.369	0.011493	up	0.67	0.42	0.64	1.18	1.53	1.47	0.576667	1.39333
rna-XM_027289829.1	gene-pla2g4a	pla2g4a	phospholipase A2 group IVA, transcript variant X1	1033.15	0.0115856	up	0	0	0	5.21	0.69	0.12	0	2.00667
rna-XM_010740584.3	gene-mmp9	mmp9	matrix metallopeptidase 9	1.696	0.0116346	up	113.04	80.3	66.94	159.55	117.23	173.42	86.76	150.067
rna-XM_010746415.3	gene-LOC104931414	LOC104931414	DNA-binding protein RFX7, transcript variant X3	209.541	0.0116708	up	0	0	0	0	0.42	0.26	0	0.226667
rna-XM_027285893.1	gene-LOC104925697	LOC104925697	dnaJ homolog subfamily A member 3, mitochondrial, transcript variant X1	239.517	0.0117107	up	0	0.01	0	0	2.25	2.69	0.00333333	1.64667
rna-XM_027277153.1	gene-ankfn1	ankfn1	ankyrin repeat and fibronectin type III domain containing 1, transcript variant X2	78.041	0.011748	up	0	0	0	0.1	0.08	0.14	0	0.106667
rna-XM_027285303.1	gene-LOC104932606	LOC104932606	integrin alpha-6, transcript variant X1	272.077	0.0117493	up	0	0	0	0	1.61	0.49	0	0.7
rna-XM_027273013.1	gene-LOC104936407	LOC104936407	glutathione hydrolase 5 proenzyme, transcript variant X3	101.094	0.0117907	up	0	0	0	0.5	0.12	0.28	0	0.3
rna-XM_010733855.3	gene-tgfb3	tgfb3	transforming growth factor beta 3	1.611	0.0118647	up	2.13	1.74	1.55	2.91	3.16	2.85	1.80667	2.97333
rna-XM_027281122.1	gene-ppip5k1	ppip5k1	diphosphoinositol pentakisphosphate kinase 1, transcript variant X8	1.81	0.0118756	up	0.91	0.91	0.62	1.48	1.74	1.29	0.813333	1.50333
rna-XM_019269171.2	gene-LOC104926500	LOC104926500	plectin, transcript variant X20	3.605	0.0119217	up	0.22	0.11	0.07	0.29	0.72	0.45	0.133333	0.486667
rna-XM_019267217.2	gene-fhl3	fhl3	four and a half LIM domains 3, transcript variant X1	95.795	0.0120551	up	0	0	0	0.33	0.13	0.5	0	0.32
rna-XM_019265320.2	gene-ets1	ets1	ETS proto-oncogene 1, transcription factor, transcript variant X1	1.623	0.0120919	up	2.71	2.34	2.25	3.74	5.1	3.25	2.43333	4.03
rna-XM_019255047.2	gene-LOC104930325	LOC104930325	collagenase 3	3.868	0.0121029	up	0.51	0.61	0.63	2.79	2.99	1.18	0.583333	2.32
id-LOC109142464	gene-LOC109142464	LOC109142464	immunoglobulin kappa variable 1-39-like	1.674	0.0121579	up	113.67	172.36	162.63	308.75	224.49	228.38	149.553	253.873
rna-XM_019267653.2	gene-ptprz1	ptprz1	protein tyrosine phosphatase, receptor type Z1, transcript variant X5	1.51	0.0122438	up	1.54	1.53	1.36	2.04	2.25	2.56	1.47667	2.28333
rna-XM_019273722.2	gene-prex2	prex2	phosphatidylinositol-3,4,5-trisphosphate dependent Rac exchange factor 2	1.683	0.0123003	up	1.04	0.95	0.9	1.84	1.34	1.79	0.963333	1.65667
rna-XM_019277663.2	gene-LOC104919156	LOC104919156	histamine H3 receptor	2.21	0.0123943	up	1.91	1.18	0.89	3.34	2.63	2.98	1.32667	2.98333
rna-XM_027288366.1	gene-lama5	lama5	laminin subunit alpha 5, transcript variant X3	4.552	0.0128793	up	0.13	0.07	0.04	0.26	0.32	0.52	0.08	0.366667
rna-XM_019265318.2	gene-gramd1b	gramd1b	GRAM domain containing 1B, transcript variant X8	176.12	0.0129025	up	0	0	0	0.42	0	0.19	0	0.203333
rna-XM_010757296.3	gene-LOC104940643	LOC104940643	CUGBP Elav-like family member 2, transcript variant X8	1.81	0.0129101	up	1.48	1.26	1.56	2.93	1.79	3.26	1.43333	2.66
rna-XM_027275460.1	gene-cul1	cul1	cullin 1, transcript variant X1	73.766	0.0131381	up	0	0	0	0.23	0.12	0.11	0	0.153333
rna-XM_019260893.2	gene-LOC104936228	LOC104936228	endothelial PAS domain-containing protein 1, transcript variant X1	1.716	0.0134089	up	2.12	1.68	2.51	3.71	2.87	4.52	2.10333	3.7
rna-XM_027286847.1	gene-ubp1	ubp1	upstream binding protein 1, transcript variant X3	218.395	0.0134313	up	0	0	0	0	0.88	0.2	0	0.36
rna-XM_027280308.1	gene-rcbtb2	rcbtb2	RCC1 and BTB domain containing protein 2, transcript variant X2	154.017	0.013434	up	0	0	0	0.17	1.21	0.19	0	0.523333
rna-XM_027284982.1	gene-usp31	usp31	ubiquitin specific peptidase 31, transcript variant X2	33.474	0.0136599	up	0.07	0	0	0.4	1.07	0.88	0.0233333	0.783333
rna-XM_027288913.1	gene-LOC104930766	LOC104930766	tensin-2, transcript variant X6	72.606	0.013667	up	0	0	0	0.06	0.06	0.13	0	0.0833333
rna-XM_019272559.2	gene-hdac7	hdac7	histone deacetylase 7, transcript variant X2	1.617	0.0137921	up	2.86	4.46	3.53	5.92	5.11	7.04	3.61667	6.02333
rna-XM_027274594.1	gene-LOC104924657	LOC104924657	AT-rich interactive domain-containing protein 1B	1.52	0.0140407	up	0.86	0.81	0.74	1.24	1.09	1.43	0.803333	1.25333
rna-XM_019253166.2	gene-crebrf	crebrf	CREB3 regulatory factor, transcript variant X2	1.915	0.0141074	up	0.33	0.33	0.49	0.83	0.83	0.6	0.383333	0.753333
rna-XM_019278824.2	gene-LOC109143041	LOC109143041	ARF GTPase-activating protein GIT2, transcript variant X7	149.052	0.014259	up	0	0	0	0	0.23	0.53	0	0.253333
rna-XM_010755153.3	gene-dera	dera	deoxyribose-phosphate aldolase	2.419	0.0143029	up	1.59	1.27	1.75	3.25	3.77	4.41	1.53667	3.81
rna-XM_027275788.1	gene-phf21a	phf21a	PHD finger protein 21A, transcript variant X2	164.476	0.0143081	up	0	0	0	0	0.1	0.35	0	0.15
rna-XM_019256777.2	gene-LOC104924620	LOC104924620	caytaxin, transcript variant X3	2.51	0.0143295	up	1.08	0.92	0.91	1.37	2.52	3.59	0.97	2.49333
rna-XM_019263736.2	gene-LOC104928500	LOC104928500	protein TsetseEP	2.4	0.0143446	up	1.05	1.09	0.63	2.48	1.77	2.55	0.923333	2.26667
rna-XM_019274241.2	gene-LOC104926668	LOC104926668	nuclear factor 1 X-type, transcript variant X10	114.361	0.0143694	up	0	0	0	0.24	0.05	0.04	0	0.11
rna-XM_010741715.3	gene-LOC104927600	LOC104927600	protein FAM43B	2.506	0.0145708	up	3.45	5.07	1.68	7.94	7.57	10.75	3.4	8.75333
rna-XM_019267658.2	gene-aass	aass	aminoadipate-semialdehyde synthase, transcript variant X2	131.304	0.0147004	up	0	0	0	0.45	0	0.16	0	0.203333
rna-XM_027274942.1	gene-LOC104933412	LOC104933412	heparan-sulfate 6-O-sulfotransferase 1-A	2.244	0.0147687	up	2.59	3.18	6.57	9.57	10.39	8.46	4.11333	9.47333
rna-XM_019265086.2	gene-tnrc18	tnrc18	trinucleotide repeat containing 18, transcript variant X1	1.601	0.0148704	up	2.05	2.65	3.57	4.59	4.31	4.7	2.75667	4.53333
rna-XM_027278421.1	gene-adgra2	adgra2	adhesion G protein-coupled receptor A2	1.565	0.0148966	up	1.26	1.14	0.99	1.69	1.96	1.78	1.13	1.81
rna-XM_027277059.1	gene-LOC104928303	LOC104928303	tankyrase-2	3.377	0.0150917	up	0.27	0.19	0.13	0.76	0.6	0.68	0.196667	0.68
rna-XM_019263854.2	gene-cd55	cd55	CD55 molecule (Cromer blood group), transcript variant X4	102.124	0.0157012	up	0	0	0	0.94	0.22	0.18	0	0.446667
rna-XM_010736392.3	gene-LOC104923330	LOC104923330	disheveled-associated activator of morphogenesis 2, transcript variant X3	2.253	0.0159455	up	0.75	0.61	0.43	1.55	1.01	1.54	0.596667	1.36667
rna-XM_019279106.2	gene-LOC104929587	LOC104929587	ras/Rap GTPase-activating protein SynGAP, transcript variant X5	66.999	0.0159607	up	0	0	0	0.08	0.03	0.05	0	0.0533333
rna-XM_019256174.2	gene-LOC104939680	LOC104939680	tetraspanin-18, transcript variant X2	63.553	0.0161098	up	0	0	0	0.21	0.29	0.56	0	0.353333
rna-XM_010737983.3	gene-LOC104924588	LOC104924588	choline-phosphate cytidylyltransferase B-like	1.701	0.0161206	up	5.2	4.23	4.04	8.51	6.08	8.76	4.49	7.78333
rna-XM_019266378.2	gene-srrm1	srrm1	serine and arginine repetitive matrix 1, transcript variant X1	3.071	0.0161753	up	0.92	1.14	0.93	3.4	4.76	1.25	0.996667	3.13667
rna-XM_019254098.2	gene-rab3gap2	rab3gap2	RAB3 GTPase activating non-catalytic protein subunit 2, transcript variant X1	23.528	0.0161977	up	0	0	0.01	0.1	0.21	0.06	0.00333333	0.123333
rna-XM_027286598.1	gene-LOC104934237	LOC104934237	ATPase family AAA domain-containing protein 2-like, transcript variant X3	80.927	0.0162117	up	0	0	0	0.1	0.37	0.11	0	0.193333
rna-XM_027276464.1	gene-LOC113745041	LOC113745041	E3 ubiquitin-protein ligase XIAP-like	29.473	0.016328	up	0	0	0.05	0.76	0.48	1.26	0.0166667	0.833333
rna-XM_019274137.2	gene-LOC104932691	LOC104932691	integral membrane protein GPR155, transcript variant X1	1.851	0.0163563	up	0.94	1.07	1.22	2.53	1.76	1.85	1.07667	2.04667
rna-XM_027286452.1	gene-rims2	rims2	regulating synaptic membrane exocytosis 2, transcript variant X18	39.994	0.0164391	up	0	0	0	0.11	0.01	0.02	0	0.0466667
rna-XM_010729344.3	gene-LOC104917794	LOC104917794	dihydropyrimidinase-related protein 3, transcript variant X1	1.598	0.0166172	up	6.42	6.48	4.51	7.7	10.27	10.47	5.80333	9.48
rna-XM_010752449.3	gene-LOC104936421	LOC104936421	mannose-binding protein C, transcript variant X1	1.599	0.0166334	up	3.42	2.73	3.02	4.78	3.92	6.29	3.05667	4.99667
rna-XM_010745026.3	gene-phldb3	phldb3	pleckstrin homology like domain family B member 3, transcript variant X2	1.679	0.0167016	up	2.7	3.04	2.53	4.79	3.53	5.91	2.75667	4.74333
rna-XM_027290359.1	gene-scfd1	scfd1	sec1 family domain containing 1	1.757	0.0167962	up	3.83	6.4	7.01	9.88	10.41	10.83	5.74667	10.3733
rna-XR_003461508.1	gene-brd8	brd8	bromodomain containing 8, transcript variant X5	132.682	0.0168295	up	0.01	0	0	1.12	0	0.99	0.00333333	0.703333
rna-XM_019267430.2	gene-LOC104934053	LOC104934053	neuropilin-1a, transcript variant X1	1.6	0.0168651	up	2.92	2.32	4	5.71	4.71	4.71	3.08	5.04333
rna-XM_027287048.1	gene-LOC113747365	LOC113747365	ictacalcin-like	1.996	0.0169515	up	8.51	7.23	6.63	13.29	15.34	16.55	7.45667	15.06
rna-XM_019276820.2	gene-nadk	nadk	NAD kinase, transcript variant X3	1.583	0.0169861	up	8.84	9.11	6.38	12.33	11.13	15.92	8.11	13.1267
rna-XM_027286260.1	gene-LOC104923042	LOC104923042	serine/threonine-protein kinase Sgk1, transcript variant X3	2.038	0.0170312	up	2.98	2.38	2.16	6.05	5.58	3.98	2.50667	5.20333
rna-XR_003461922.1	gene-LOC113744960	LOC113744960	uncharacterized LOC113744960, transcript variant X1	76.443	0.0170398	up	0	0	0	0.21	0.04	0.18	0	0.143333
rna-XM_027281343.1	gene-cemip	cemip	cell migration inducing hyaluronidase 1, transcript variant X1	61.277	0.0170639	up	0.01	0	0	0	0.4	0.42	0.00333333	0.273333
rna-XM_010732846.3	gene-LOC104920550	LOC104920550	lactosylceramide 1,3-N-acetyl-beta-D-glucosaminyltransferase A, transcript variant X3	2.432	0.0170837	up	7.45	2.89	3.88	7.56	15.18	12.36	4.74	11.7
rna-XM_010736317.3	gene-LOC104923272	LOC104923272	hypothetical protein, transcript variant X1	1.785	0.0171783	up	7.57	4.51	5.44	9.49	10.06	12.2	5.84	10.5833
rna-XM_027279253.1	gene-LOC113744035	LOC113744035	uncharacterized LOC113744035, transcript variant X1	4.16	0.0172146	up	0.48	0.31	1.14	1.54	2.81	3.91	0.643333	2.75333
rna-XM_027290103.1	gene-mast2	mast2	microtubule associated serine/threonine kinase 2, transcript variant X1	1.776	0.0172597	up	0.53	0.55	0.38	0.73	0.96	0.97	0.486667	0.886667
rna-XM_027289274.1	gene-kansl1	kansl1	KAT8 regulatory NSL complex subunit 1, transcript variant X5	2.913	0.0172806	up	0.28	0.49	0.23	1.37	0.9	0.75	0.333333	1.00667
rna-XM_010730838.3	gene-fgfr4	fgfr4	fibroblast growth factor receptor 4	1.766	0.0172998	up	0.6	0.67	0.78	1.2	1.17	1.35	0.683333	1.24
rna-XM_019259730.2	gene-LOC104918527	LOC104918527	UTP--glucose-1-phosphate uridylyltransferase, transcript variant X2	1.578	0.0173371	up	3.13	2.94	3.33	4.75	4.79	5.63	3.13333	5.05667
rna-XM_027289786.1	gene-stard13	stard13	StAR related lipid transfer domain containing 13, transcript variant X2	2.041	0.0176303	up	1.11	0.76	0.76	2.45	1.76	1.27	0.876667	1.82667
rna-XM_010742618.3	gene-gpr182	gpr182	G protein-coupled receptor 182	1.678	0.0177813	up	6.65	9.25	6	15.36	10.16	12.13	7.3	12.55
rna-XM_010745046.3	gene-mark1	mark1	microtubule affinity regulating kinase 1, transcript variant X2	1.568	0.0178247	up	1.47	1.5	1.74	2.45	2.4	2.71	1.57	2.52
rna-XM_027282720.1	gene-zbtb33	zbtb33	zinc finger and BTB domain containing 33, transcript variant X1	1.514	0.0181311	up	3.1	2.04	2.28	4.04	3.32	4.11	2.47333	3.82333
rna-XM_027290730.1	gene-arf1	arf1	ADP ribosylation factor 1, transcript variant X3	6.229	0.0181393	up	0.83	0.32	0.32	3.68	4.91	0.71	0.49	3.1
rna-XM_027276691.1	gene-LOC104935440	LOC104935440	spectrin beta chain, non-erythrocytic 1, transcript variant X2	1.699	0.0182096	up	2.67	1.32	1.69	3.48	3.01	3.34	1.89333	3.27667
rna-XM_027274795.1	gene-LOC104938284	LOC104938284	uncharacterized LOC104938284, transcript variant X1	47.09	0.018314	up	0	0	0	0.29	0.24	0.24	0	0.256667
rna-XM_019267650.2	gene-ptprz1	ptprz1	protein tyrosine phosphatase, receptor type Z1, transcript variant X1	70.147	0.0184213	up	0	0	0	0.03	0.07	0.13	0	0.0766667
rna-XM_019267198.2	gene-LOC109140398	LOC109140398	C-X-C chemokine receptor type 3-2-like	1.536	0.0184409	up	19	19.93	26.15	33.37	41.41	27.41	21.6933	34.0633
rna-XM_027275620.1	gene-LOC104935493	LOC104935493	membrane-associated guanylate kinase, WW and PDZ domain-containing protein 1, transcript variant X1	75.788	0.0184757	up	0	0	0	0.27	0	0.39	0	0.22
rna-XM_010752209.3	gene-nacc2	nacc2	NACC family member 2, transcript variant X1	1.642	0.0184788	up	0.83	0.78	0.89	1.32	1.11	1.8	0.833333	1.41
rna-XM_027272523.1	gene-kcp	kcp	kielin cysteine rich BMP regulator	1.702	0.018496	up	0.81	1.08	0.91	1.36	1.46	2.09	0.933333	1.63667
rna-XM_010736256.3	gene-LOC104923224	LOC104923224	zinc finger protein 646, transcript variant X1	4.304	0.0187032	up	0.43	0.16	0.15	1.97	0.68	0.58	0.246667	1.07667
rna-XM_010752108.3	gene-LOC104936131	LOC104936131	beta-crystallin B3, transcript variant X1	71.202	0.018777	up	0	0	0	1.1	0.2	0.7	0	0.666667
rna-XM_019258549.2	gene-sulf1	sulf1	sulfatase 1, transcript variant X9	61.537	0.0190321	up	0	0	0	0.09	0.23	0.07	0	0.13
rna-XM_019276650.2	gene-kif26a	kif26a	kinesin family member 26A, transcript variant X1	1.582	0.0191195	up	1	0.89	0.75	1.55	1.42	1.3	0.88	1.42333
rna-XM_010733831.3	gene-LOC104921332	LOC104921332	delta-like protein 4	1.555	0.0191397	up	1.18	1.33	1.38	2.11	2.01	2.09	1.29667	2.07
rna-XM_027284222.1	gene-aida	aida	axin interactor, dorsalization associated, transcript variant X2	50.672	0.0191757	up	0	0	0	0.13	0.07	0.16	0	0.12
rna-XM_027284221.1	gene-aida	aida	axin interactor, dorsalization associated, transcript variant X1	50.672	0.0191757	up	0	0	0	0.13	0.07	0.16	0	0.12
rna-XM_019255759.2	gene-LOC104926312	LOC104926312	probable ubiquitin carboxyl-terminal hydrolase FAF-X, transcript variant X7	1.715	0.0194432	up	1.36	0.76	1.18	1.48	2.16	2.15	1.1	1.93
rna-XM_019273007.2	gene-slc25a3	slc25a3	solute carrier family 25 member 3, transcript variant X3	1.576	0.0195389	up	18.22	20.45	22.46	23.04	35.58	40.01	20.3767	32.8767
rna-XM_027283504.1	gene-LOC104927689	LOC104927689	uncharacterized LOC104927689, transcript variant X2	51.725	0.0196743	up	0	0	0	0.11	0.04	0.12	0	0.09
rna-XM_027287893.1	gene-tmem259	tmem259	transmembrane protein 259, transcript variant X3	2.025	0.0196909	up	0.86	1.26	1.07	2.02	2.86	1.76	1.06333	2.21333
rna-XM_027286523.1	gene-macf1	macf1	microtubule-actin crosslinking factor 1, transcript variant X5	2.714	0.0200996	up	0.08	0.17	0.16	0.32	0.58	0.23	0.136667	0.376667
rna-XM_027287075.1	gene-LOC104923770	LOC104923770	furin-like protease kpc-1, transcript variant X2	79.741	0.0201042	up	0	0	0	0.05	0.3	0.43	0	0.26
rna-XM_027286883.1	gene-hace1	hace1	HECT domain and ankyrin repeat containing E3 ubiquitin protein ligase 1, transcript variant X1	134.132	0.0202205	up	0	0	0	0.58	0.07	0	0	0.216667
rna-XM_019273793.2	gene-LOC104918109	LOC104918109	MOB kinase activator 2, transcript variant X2	43.288	0.020448	up	0	0	0	0.2	0.28	0.17	0	0.216667
rna-XM_027289677.1	gene-LOC104938095	LOC104938095	mitofusin-1, transcript variant X10	47.142	0.0209454	up	0	0	0	0.08	0.17	0.21	0	0.153333
rna-XM_010739275.3	gene-fgfr2	fgfr2	fibroblast growth factor receptor 2, transcript variant X2	3.781	0.0210043	up	0.22	0.32	0.1	0.51	0.95	1.02	0.213333	0.826667
rna-XM_019263552.2	gene-dmtf1	dmtf1	cyclin D binding myb like transcription factor 1, transcript variant X1	3.206	0.0211886	up	1.15	0.47	2.17	4.32	3.42	4.64	1.26333	4.12667
rna-XM_010731808.3	gene-mtmr2	mtmr2	myotubularin related protein 2, transcript variant X1	1.557	0.021445	up	2.86	3.93	2.91	6.16	4.39	4.94	3.23333	5.16333
rna-XM_010745719.3	gene-marveld1	marveld1	MARVEL domain containing 1	1.615	0.0218086	up	4.49	4.31	2.98	5.84	6.86	6.74	3.92667	6.48
rna-XM_019261408.2	gene-LOC104931913	LOC104931913	spondin-1	1.647	0.0220985	up	2.13	2.04	1.51	3.41	3.42	2.73	1.89333	3.18667
rna-XM_019257959.2	gene-LOC104921794	LOC104921794	CD209 antigen-like protein E, transcript variant X2	1.587	0.0221157	up	3.98	3.39	3.74	4.88	6.51	6.61	3.70333	6
rna-XM_027290015.1	gene-sgip1	sgip1	SH3 domain GRB2 like endophilin interacting protein 1, transcript variant X11	61.074	0.0223034	up	0	0	0	0.11	0.02	0.07	0	0.0666667
rna-XM_027290000.1	gene-spata6	spata6	spermatogenesis associated 6, transcript variant X2	25.922	0.0223458	up	0.03	0	0	0.5	0.19	0.31	0.01	0.333333
rna-XM_019261194.2	gene-LOC104922392	LOC104922392	monoacylglycerol lipase ABHD2-B, transcript variant X2	1.774	0.0223471	up	2.65	1.95	2.91	6.04	4.29	3.27	2.50333	4.53333
rna-XM_010748917.3	gene-LOC104933463	LOC104933463	tropomyosin beta chain, transcript variant X4	18.163	0.0224475	up	0.03	0.13	0	0.75	0.5	1.85	0.0533333	1.03333
rna-XM_010756593.3	gene-arg2	arg2	arginase 2	1.56	0.0225172	up	17.58	13.89	13.05	23.79	17.11	30	14.84	23.6333
rna-XM_027276034.1	gene-LOC109140471	LOC109140471	hypothetical protein, transcript variant X5	41.652	0.0229208	up	0	0	0	0.2	0.16	0.08	0	0.146667
rna-XM_010735213.2	gene-alkbh3	alkbh3	alkB homolog 3, alpha-ketoglutaratedependent dioxygenase, transcript variant X5	1.945	0.0229457	up	1.25	1.69	1.05	3.16	2.54	2.25	1.33	2.65
rna-XM_010746750.3	gene-rnf152	rnf152	ring finger protein 152	3.944	0.023118	up	0.22	0.06	0.24	0.94	0.49	0.67	0.173333	0.7
rna-XM_019275381.2	gene-slco2a1	slco2a1	solute carrier organic anion transporter family member 2A1	1.59	0.0236065	up	3.47	2.46	2.43	5.07	4.68	3.78	2.78667	4.51
rna-XM_027275254.1	gene-LOC109138083	LOC109138083	B2 bradykinin receptor-like	37.862	0.0236128	up	0	0	0	0.3	0.44	0.24	0	0.326667
rna-XM_010746709.3	gene-LOC104931657	LOC104931657	vacuolar protein sorting-associated protein 26B-like, transcript variant X1	1688.26	0.0236342	up	0	0	0	0	3.43	5.9	0	3.11
rna-XM_010751142.3	gene-gpat4	gpat4	glycerol-3-phosphate acyltransferase 4, transcript variant X2	1.729	0.0237825	up	5.06	3.52	3.1	6.83	5.22	8.52	3.89333	6.85667
rna-XM_019277372.2	gene-mllt1	mllt1	MLLT1, super elongation complex subunit, transcript variant X1	1.503	0.0239128	up	1.22	0.89	1.1	1.63	1.36	1.95	1.07	1.64667
rna-XM_027289068.1	gene-LOC104933157	LOC104933157	microfibril-associated glycoprotein 4	2.001	0.0239156	up	11.97	15.56	8.46	35.52	17.9	20.14	11.9967	24.52
rna-XM_027275968.1	gene-LOC113744884	LOC113744884	WNT1-inducible-signaling pathway protein 2-like, transcript variant X1	50.801	0.0239829	up	0	0	0	0	0.21	0.23	0	0.146667
rna-XM_010737206.3	gene-LOC104923986	LOC104923986	fatty acid-binding protein, intestinal	6.328	0.0241049	up	0.1	0.26	0.13	0.78	1.71	0.82	0.163333	1.10333
rna-XM_027276295.1	gene-LOC104931896	LOC104931896	globoside alpha-1,3-N-acetylgalactosaminyltransferase 1, transcript variant X3	2.149	0.0241458	up	10.97	9.05	5.46	19.49	10.58	25.84	8.49333	18.6367
rna-XM_019278310.2	gene-LOC104925412	LOC104925412	probable palmitoyltransferase ZDHHC8, transcript variant X1	2.022	0.0242848	up	1.17	1.14	0.83	1.95	2.89	1.66	1.04667	2.16667
rna-XM_027289399.1	gene-LOC104917731	LOC104917731	elongation factor 1-delta, transcript variant X11	44.116	0.0243835	up	0	0	0	0.26	0.72	0.25	0	0.41
rna-XM_027287132.1	gene-LOC104925498	LOC104925498	titin, transcript variant X7	121.647	0.0244906	up	0	0	0	0.09	0.01	0.27	0	0.123333
rna-XM_019272048.2	gene-LOC104918914	LOC104918914	rho GTPase-activating protein 17, transcript variant X3	2.098	0.0248211	up	1.93	0.75	1.55	3.75	2.68	2.58	1.41	3.00333
rna-XM_010751802.3	gene-LOC104935892	LOC104935892	serine/threonine-protein kinase NLK2	39.911	0.0249166	up	0	0	0	0.12	0.13	0.05	0	0.1
rna-XM_027283463.1	gene-LOC104921170	LOC104921170	breast cancer anti-estrogen resistance protein 3, transcript variant X2	33.268	0.0250595	up	0	0	0	0.07	0.07	0.07	0	0.07
rna-XM_027290157.1	gene-adgrl2	adgrl2	adhesion G protein-coupled receptor L2, transcript variant X26	49.54	0.0250662	up	0	0	0	0	0.09	0.08	0	0.0566667
rna-XM_019276982.2	gene-LOC104937223	LOC104937223	basic leucine zipper and W2 domain-containing protein 1-A, transcript variant X2	30.571	0.025144	up	0.18	0	0	4.44	0.82	0.93	0.06	2.06333
rna-XM_019256934.2	gene-LOC104927444	LOC104927444	protein phosphatase 1 regulatory subunit 12B-like, transcript variant X4	32.945	0.0254807	up	0	0	0	0.02	0.03	0.03	0	0.0266667
rna-XM_019275489.2	gene-LOC104933796	LOC104933796	ADP-ribosyl cyclase/cyclic ADP-ribose hydrolase 1, transcript variant X3	1.916	0.0255387	up	10.18	6.66	7.84	23.85	11.22	12.96	8.22667	16.01
rna-XM_027273923.1	gene-LOC109137325	LOC109137325	collagenase 3, transcript variant X1	2.393	0.0255499	up	1.54	2.27	1.61	6.42	3.78	3.08	1.80667	4.42667
rna-XM_019260130.2	gene-LOC104920093	LOC104920093	matrix metalloproteinase-17	1.78	0.0256472	up	1.28	1.6	1.62	2.59	2.73	2.92	1.5	2.74667
rna-XM_019253463.2	gene-LOC109136858	LOC109136858	protein shisa-7	34.94	0.0257056	up	0	0	0	0.06	0.06	0.03	0	0.05
rna-XM_027276272.1	gene-itga2b	itga2b	integrin subunit alpha 2b, transcript variant X2	1270.7	0.025917	up	0	0	0	2.48	0	5.78	0	2.75333
rna-XM_010745348.3	gene-fgf7	fgf7	fibroblast growth factor 7, transcript variant X1	32.452	0.0261226	up	0	0	0	0.1	0.14	0.15	0	0.13
rna-XM_019269130.2	gene-arhgef28	arhgef28	Rho guanine nucleotide exchange factor 28, transcript variant X1	2.229	0.0261283	up	0.27	0.37	0.23	0.82	0.53	0.64	0.29	0.663333
rna-XM_027285539.1	gene-jmjd8	jmjd8	jumonji domain containing 8, transcript variant X1	46.508	0.0261625	up	0	0	0	0.2	0.24	0.81	0	0.416667
rna-XM_027285826.1	gene-LOC104940175	LOC104940175	interferon-induced very large GTPase 1, transcript variant X2	2.891	0.0262461	up	0.21	0.1	0.3	0.57	0.57	0.65	0.203333	0.596667
rna-XM_019275956.2	gene-mef2c	mef2c	myocyte enhancer factor 2C, transcript variant X5	726.879	0.0264042	up	0	0	0	1.51	0	2.19	0	1.23333
rna-XM_019255224.2	gene-LOC104934318	LOC104934318	transcriptional regulator Myc-B	1.918	0.0264453	up	2.95	4.23	2.87	6.87	4.39	8.52	3.35	6.59333
rna-XM_027290347.1	gene-LOC104929347	LOC104929347	voltage-dependent R-type calcium channel subunit alpha-1E	11.403	0.026648	up	0.02	0.01	0.01	0.02	0.3	0.12	0.0133333	0.146667
rna-XM_027285260.1	gene-LOC104920593	LOC104920593	endothelin receptor type B, transcript variant X3	1.53	0.0267161	up	9.09	5.51	5.5	9.48	9.73	12.13	6.7	10.4467
rna-XM_027275705.1	gene-LOC113744768	LOC113744768	stefin-C-like	45.714	0.0267277	up	0	0	0	3.44	8.25	1.71	0	4.46667
rna-XM_019269702.2	gene-pold4	pold4	DNA polymerase delta 4, accessory subunit, transcript variant X1	148.182	0.026751	up	0	0	0	0.49	0.23	5.66	0	2.12667
rna-XM_027282087.1	gene-srek1	srek1	splicing regulatory glutamic acid and lysine rich protein 1, transcript variant X7	846.463	0.0267601	up	0	0	0	2.12	2.23	0	0	1.45
rna-XM_010737667.3	gene-LOC104924350	LOC104924350	interleukin-8	1.861	0.0267627	up	97.28	49.74	43.13	94.5	138.93	122.79	63.3833	118.74
rna-XM_027274713.1	gene-inf2	inf2	inverted formin, FH2 and WH2 domain containing, transcript variant X3	2.426	0.026766	up	0.78	1.29	0.4	1.96	1.79	2.43	0.823333	2.06
rna-XM_027281319.1	gene-LOC104920081	LOC104920081	multiple C2 and transmembrane domain-containing protein 2, transcript variant X4	31.599	0.0268324	up	0	0	0	0.08	0.1	0.07	0	0.0833333
rna-XM_010737856.3	gene-sec16a	sec16a	SEC16 homolog A, endoplasmic reticulum export factor, transcript variant X1	1.679	0.0268384	up	2.71	1.7	2.51	2.65	4.6	4.63	2.30667	3.96
rna-XM_019262182.2	gene-LOC104929652	LOC104929652	transcription factor E2-alpha-like, transcript variant X6	10.671	0.0269483	up	0	0.11	0.23	1.68	1.08	0.93	0.113333	1.23
rna-XM_027283405.1	gene-gtf3c1	gtf3c1	general transcription factor IIIC subunit 1, transcript variant X2	851.99	0.0272611	up	0	0	0	0	0.87	1.89	0	0.92
rna-XM_019261361.2	gene-kdelc2	kdelc2	KDEL motif containing 2, transcript variant X2	2.298	0.0275934	up	1.75	1.65	0.9	3.78	3.43	2.88	1.43333	3.36333
rna-XM_010748861.3	gene-LOC104933418	LOC104933418	hypothetical protein, transcript variant X1	1.732	0.0276266	up	3.19	2.79	2.27	6.18	3.96	4.45	2.75	4.86333
rna-XM_019272699.2	gene-wdr90	wdr90	WD repeat domain 90, transcript variant X1	3.056	0.0276519	up	0.21	0.27	0.17	0.29	1.1	0.67	0.216667	0.686667
rna-XM_010742670.3	gene-gamt	gamt	guanidinoacetate N-methyltransferase	7.646	0.0276874	up	0.24	0.07	0.15	0.94	1.99	0.81	0.153333	1.24667
rna-XM_027281992.1	gene-morn5	morn5	MORN repeat containing 5, transcript variant X3	45.957	0.0277387	up	0	0	0	0.11	0.39	0.09	0	0.196667
rna-XM_027284890.1	gene-LOC109140123	LOC109140123	germ cell-specific gene 1-like protein, transcript variant X6	42.108	0.0277604	up	0	0	0	0.53	0.16	0.15	0	0.28
rna-XM_019279097.2	gene-LOC104928641	LOC104928641	transcription factor HES-2	32.6	0.0280134	up	0	0	0	0.14	0.13	0.28	0	0.183333
rna-XM_019271375.2	gene-tdrkh	tdrkh	tudor and KH domain containing, transcript variant X4	3.446	0.0282395	up	0.56	0.25	0.24	0.99	1.77	0.94	0.35	1.23333
rna-XM_010737712.3	gene-LOC104924384	LOC104924384	epsin-1, transcript variant X2	20.682	0.028362	up	0.03	0	0	0.28	0.19	0.33	0.01	0.266667
rna-XM_019277937.2	gene-tmx1	tmx1	thioredoxin related transmembrane protein 1	1.502	0.0285479	up	12.93	15.08	14.17	26.97	15.43	22.51	14.06	21.6367
rna-XM_010749641.3	gene-LOC104934064	LOC104934064	leucine-rich repeat-containing protein 17	1.906	0.0287318	up	1.68	1.94	1.28	4.5	2.41	2.64	1.63333	3.18333
rna-XM_019278727.2	gene-LOC104934127	LOC104934127	peptidyl-prolyl cis-trans isomerase	1.78	0.0290072	up	123.45	61.03	136.33	227.54	187.86	161.08	106.937	192.16
rna-XM_027278847.1	gene-LOC104935153	LOC104935153	protein-glutamine gamma-glutamyltransferase E	8.343	0.0290222	up	0.11	0.05	0.05	0.38	1.22	0.18	0.07	0.593333
rna-XM_019259109.2	gene-LOC104929538	LOC104929538	serine/threonine-protein phosphatase 2A 56 kDa regulatory subunit epsilon isoform, transcript variant X3	1.784	0.0290248	up	3.56	4.24	1.9	5.18	6.37	6.22	3.23333	5.92333
rna-XM_010742170.3	gene-chd8	chd8	chromodomain helicase DNA binding protein 8, transcript variant X3	2.224	0.0290393	up	0.68	1.27	1.02	3.55	1.43	1.82	0.99	2.26667
rna-XM_010734527.3	gene-ikzf1	ikzf1	IKAROS family zinc finger 1, transcript variant X2	1.658	0.0290525	up	4.65	4.11	6.03	7.48	11.19	6.39	4.93	8.35333
rna-XM_027281159.1	gene-tdp1	tdp1	tyrosyl-DNA phosphodiesterase 1, transcript variant X2	135.213	0.0291042	up	0.01	0	0	2.53	0	0.09	0.00333333	0.873333
rna-XM_010733247.3	gene-LOC104920865	LOC104920865	ubiquitin carboxyl-terminal hydrolase 2, transcript variant X2	35.926	0.0293637	up	0	0	0	0.09	0.13	0.04	0	0.0866667
rna-XM_019275811.2	gene-wscd2	wscd2	WSC domain containing 2, transcript variant X2	2.425	0.0293837	up	0.58	1.54	1.2	2.25	2.07	4	1.10667	2.77333
rna-XM_027275530.1	gene-ep400	ep400	E1A binding protein p400, transcript variant X2	441.8	0.029447	up	0	0	0	0	0.45	0.51	0	0.32
rna-XM_019262515.2	gene-LOC104931339	LOC104931339	arginine-glutamic acid dipeptide repeats protein, transcript variant X2	2.256	0.0294952	up	0.43	0.7	0.98	1.08	1.87	1.95	0.703333	1.63333
rna-XM_027290155.1	gene-adgrl2	adgrl2	adhesion G protein-coupled receptor L2, transcript variant X13	28.062	0.0295197	up	0	0	0	0.03	0.04	0.04	0	0.0366667
rna-XM_027278357.1	gene-plat	plat	plasminogen activator, tissue type, transcript variant X4	39.127	0.0297676	up	0.08	0.02	0	2.62	0.01	1.53	0.0333333	1.38667
rna-XM_019260176.2	gene-LOC104931845	LOC104931845	regulator of G-protein signaling 17, transcript variant X5	420.877	0.0298139	up	0	0	0	0	1.27	1.46	0	0.91
rna-XM_019274206.2	gene-osbpl6	osbpl6	oxysterol binding protein like 6, transcript variant X4	481.155	0.0300908	up	0	0	0	0	0.59	1.26	0	0.616667
rna-XM_027284217.1	gene-LOC104926776	LOC104926776	rho-associated protein kinase 2, transcript variant X4	2.261	0.0303414	up	0.3	0.28	0.26	0.72	0.61	0.63	0.28	0.653333
rna-XM_019263720.2	gene-LOC104923012	LOC104923012	transducin-like enhancer protein 4, transcript variant X1	84.421	0.0303613	up	0	0	0	0.18	0.29	0.01	0	0.16
rna-XM_027277653.1	gene-ttc37	ttc37	tetratricopeptide repeat domain 37, transcript variant X2	455.145	0.0304115	up	0	0	0	0	0.67	1.42	0	0.696667
rna-XM_027281403.1	gene-LOC104920144	LOC104920144	GC-rich sequence DNA-binding factor 2, transcript variant X4	22.968	0.0306464	up	0.25	0	0	1.06	1.15	3.69	0.0833333	1.96667
rna-XM_019277754.2	gene-aatk	aatk	apoptosis associated tyrosine kinase, transcript variant X2	1.549	0.0307233	up	0.67	0.75	0.8	0.99	1.21	1.34	0.74	1.18
rna-XM_010745511.3	gene-LOC104930657	LOC104930657	inactive carboxypeptidase-like protein X2, transcript variant X3	378.812	0.0307259	up	0	0	0	0.91	0.83	0	0	0.58
rna-XM_027273387.1	gene-LOC113744330	LOC113744330	endonuclease domain-containing 1 protein-like, transcript variant X2	65.099	0.030744	up	0	0	0	0.11	1.18	0	0	0.43
rna-XM_010757285.3	gene-LOC104940632	LOC104940632	nuclear receptor subfamily 2 group C member 1, transcript variant X1	2.948	0.0307601	up	0.89	0.55	0.6	0.76	2.79	2.59	0.68	2.04667
rna-XM_027278914.1	gene-pxn	pxn	paxillin, transcript variant X2	2.201	0.0308432	up	0.72	1.21	1.89	3.1	3.3	2.26	1.27333	2.88667
rna-XM_019267427.2	gene-LOC104932643	LOC104932643	nuclear receptor coactivator 2, transcript variant X3	434.187	0.030939	up	0	0	0	0.76	1.28	0	0	0.68
rna-XM_019263439.2	gene-LOC104940258	LOC104940258	tetraspanin-9, transcript variant X3	400.41	0.0309872	up	0	0	0	0.62	0.71	0	0	0.443333
rna-XM_027274122.1	gene-svil	svil	supervillin, transcript variant X15	37.847	0.0310433	up	0	0	0	0.03	0.06	0.01	0	0.0333333
rna-XM_019270311.2	gene-LOC104931214	LOC104931214	interleukin-1 receptor accessory protein-like 1-B, transcript variant X3	36.309	0.0311425	up	0	0	0	0.12	0	0.13	0	0.0833333
rna-XM_019257586.2	gene-romo1	romo1	reactive oxygen species modulator 1	1.631	0.031406	up	71.31	104.01	90.68	133.47	108.05	198.69	88.6667	146.737
rna-XM_019266382.2	gene-srrm1	srrm1	serine and arginine repetitive matrix 1, transcript variant X6	596.932	0.0314935	up	0	0	0	2.86	0	0.68	0	1.18
rna-XM_027274508.1	gene-luzp1	luzp1	leucine zipper protein 1, transcript variant X3	376.052	0.0315017	up	0	0	0	0.43	0.39	0	0	0.273333
rna-XM_027274935.1	gene-tecpr2	tecpr2	tectonin beta-propeller repeat containing 2, transcript variant X1	363.469	0.0316202	up	0	0	0	0	0.6	1.02	0	0.54
rna-XM_010731351.3	gene-errfi1	errfi1	ERBB receptor feedback inhibitor 1	1.576	0.0316559	up	1.96	2.85	1.81	3.39	3.32	4.01	2.20667	3.57333
rna-XM_019274843.2	gene-LOC104929070	LOC104929070	leukocyte elastase inhibitor, transcript variant X2	28.942	0.0317973	up	0	0	0	0.15	0.06	0.13	0	0.113333
rna-XM_027278284.1	gene-LOC113743982	LOC113743982	uncharacterized LOC113743982, transcript variant X3	59.068	0.031956	up	0	0	0	0.57	0.22	0.04	0	0.276667
rna-XM_010734470.3	gene-LOC104921819	LOC104921819	tyrosine-protein kinase ZAP-70, transcript variant X2	3.626	0.0319797	up	1.36	0.48	0.42	1.07	4.36	2.87	0.753333	2.76667
rna-XM_019264559.2	gene-LOC104924428	LOC104924428	transcription factor 7, transcript variant X2	1.718	0.0320011	up	1.79	1.15	1.1	2.65	2.52	1.89	1.34667	2.35333
rna-XR_003462374.1	gene-LOC113745745	LOC113745745	uncharacterized LOC113745745, transcript variant X2	62.45	0.0321314	up	0	0	0	0.42	0.18	0.02	0	0.206667
rna-XM_010735248.3	gene-LOC104922426	LOC104922426	transforming growth factor beta-3 proprotein, transcript variant X1	2.568	0.0321774	up	0.53	0.35	0.32	0.84	1.24	1.05	0.4	1.04333
rna-XM_010743739.3	gene-LOC104929269	LOC104929269	arrestin domain-containing protein 3-like	34.522	0.0321964	up	0	0	0	0.31	0.08	0.11	0	0.166667
rna-XM_019269758.2	gene-LOC104929970	LOC104929970	caskin-1, transcript variant X3	1.882	0.0322361	up	0.73	0.78	0.84	1.09	2.26	1.2	0.783333	1.51667
rna-XM_019267285.2	gene-LOC104922198	LOC104922198	uncharacterized LOC104922198, transcript variant X5	1.97	0.0322925	up	0.56	1.08	1.21	1.61	2.32	1.87	0.95	1.93333
rna-XR_003462763.1	gene-LOC104938639	LOC104938639	multidrug resistance-associated protein 1-like, transcript variant X5	301.769	0.0323315	up	0	0	0	0.41	0	0.52	0	0.31
rna-XM_027274371.1	gene-LOC104939158	LOC104939158	microtubule-associated protein 4, transcript variant X7	1.888	0.0323651	up	1.1	0.6	0.63	1.58	1.61	1.28	0.776667	1.49
rna-XM_027277068.1	gene-LOC104928292	LOC104928292	hepatic leukemia factor, transcript variant X1	29.324	0.032416	up	0	0	0	0.13	0.38	0.26	0	0.256667
rna-XM_027289502.1	gene-tcf7l2	tcf7l2	transcription factor 7 like 2, transcript variant X10	20.099	0.0327657	up	0.06	0	0	0.39	0.35	0.57	0.02	0.436667
rna-XM_027273420.1	gene-htatsf1	htatsf1	HIV-1 Tat specific factor 1, transcript variant X3	491.046	0.0328335	up	0	0	0	6.81	0	1.6	0	2.80333
rna-XM_010750284.3	gene-LOC104934592	LOC104934592	far upstream element-binding protein 2, transcript variant X1	3.338	0.0328346	up	0.76	0.26	0.28	1.32	1.87	1.23	0.433333	1.47333
rna-XM_027277667.1	gene-mpdz	mpdz	multiple PDZ domain crumbs cell polarity complex component, transcript variant X10	3.95	0.0330606	up	0.05	0.05	0.19	0.39	0.32	0.5	0.0966667	0.403333
rna-XM_027282703.1	gene-tmem246	tmem246	transmembrane protein 246, transcript variant X1	2.043	0.0330607	up	0.59	0.99	0.91	1.53	1.35	2.38	0.83	1.75333
rna-XM_010757007.3	gene-LOC104940407	LOC104940407	transcription cofactor vestigial-like protein 2	8.595	0.0334237	up	0.03	0.03	0.03	0.4	0.31	0.1	0.03	0.27
rna-XM_019264785.2	gene-dnmbp	dnmbp	dynamin binding protein, transcript variant X4	19.595	0.0334249	up	0	0.04	0	0.51	0.34	0.06	0.0133333	0.303333
rna-XM_019276648.1	gene-LOC104935739	LOC104935739	leucine-rich repeat and immunoglobulin-like domain-containing nogo receptor-interacting protein 1, transcript variant X1	1.588	0.0334273	up	1.26	1.54	2.02	2.41	2.48	2.98	1.60667	2.62333
rna-XM_019264870.2	gene-kif21b	kif21b	kinesin family member 21B, transcript variant X5	305.655	0.0334707	up	0	0	0	0.54	0.51	0	0	0.35
rna-XM_010735622.3	gene-rasgef1c	rasgef1c	RasGEF domain family member 1C, transcript variant X1	1.743	0.033546	up	2.71	1.29	1.75	3.45	3.65	3.1	1.91667	3.4
rna-XM_010748318.3	gene-LOC104932970	LOC104932970	sodium channel protein type 8 subunit alpha, transcript variant X6	304.337	0.0335525	up	0	0	0	0.29	0.34	0	0	0.21
rna-XM_027272653.1	gene-LOC104933705	LOC104933705	guanine nucleotide-binding protein G(o) subunit alpha, transcript variant X2	2.032	0.0336304	up	5.63	3.95	2.39	4.96	10.58	9.29	3.99	8.27667
rna-NM_001303362.1	gene-LOC104920743	LOC104920743	cytochrome P450 1A1	1.624	0.0337014	up	5	2.65	2.91	5.49	5.51	6.43	3.52	5.81
rna-XM_027280001.1	gene-ift80	ift80	intraflagellar transport 80, transcript variant X3	387.951	0.0337017	up	0	0	0	2.26	0.81	0	0	1.02333
rna-XM_027290529.1	gene-LOC104935235	LOC104935235	FRAS1-related extracellular matrix protein 1, transcript variant X1	298.444	0.0337301	up	0	0	0	0.46	0.42	0	0	0.293333
rna-XM_027275587.1	gene-LOC104935487	LOC104935487	plexin-B3, transcript variant X7	1.612	0.0338426	up	0.51	0.35	0.49	0.67	0.78	0.79	0.45	0.746667
rna-XM_027290057.1	gene-farp2	farp2	FERM, ARH/RhoGEF and pleckstrin domain protein 2, transcript variant X4	260.224	0.0338873	up	0	0	0	0.85	0	1.03	0	0.626667
rna-XM_027290859.1	gene-rif1	rif1	replication timing regulatory factor 1, transcript variant X1	437.48	0.0341317	up	0	0	0	0	1.27	0	0	0.423333
rna-XM_019268772.2	gene-gorab	gorab	golgin, RAB6 interacting	455.829	0.0341928	up	0	0	0	0.68	0	3.43	0	1.37
rna-XM_010736274.3	gene-kiaa0556	kiaa0556	KIAA0556 ortholog, transcript variant X1	1.815	0.0342073	up	1.81	0.88	1.07	2.55	1.69	2.71	1.25333	2.31667
rna-XM_019269152.2	gene-rspo2	rspo2	R-spondin 2, transcript variant X2	23.426	0.0342607	up	0	0	0	0.15	0.18	0.16	0	0.163333
rna-XM_027274028.1	gene-ipo4	ipo4	importin 4, transcript variant X1	1.643	0.0343202	up	2.73	1.89	1.5	2.83	4.14	3.3	2.04	3.42333
rna-XM_027280047.1	gene-synrg	synrg	synergin gamma, transcript variant X8	376.575	0.0344505	up	0	0	0	0	1.49	0.42	0	0.636667
rna-XM_027285639.1	gene-LOC104917648	LOC104917648	NACHT, LRR and PYD domains-containing protein 3, transcript variant X3	1.591	0.0344739	up	4.14	7.74	5.58	9.32	8.3	10.99	5.82	9.53667
rna-XM_019259918.2	gene-LOC109136685	LOC109136685	E3 ubiquitin-protein ligase Midline-1, transcript variant X1	1.596	0.0344852	up	0.92	1.11	0.98	1.65	1.76	1.52	1.00333	1.64333
rna-XM_027286543.1	gene-macf1	macf1	microtubule-actin crosslinking factor 1, transcript variant X25	1.75	0.0345658	up	0.67	0.28	0.48	0.9	0.91	0.72	0.476667	0.843333
rna-XM_019255694.2	gene-secisbp2	secisbp2	SECIS binding protein 2, transcript variant X1	361.677	0.0346479	up	0	0	0	0	0.42	1.5	0	0.64
rna-XM_027274065.1	gene-LOC104925287	LOC104925287	uncharacterized LOC104925287, transcript variant X2	2.534	0.0346633	up	0.53	0.25	0.17	0.56	0.76	1.14	0.316667	0.82
rna-XM_027277235.1	gene-LOC104923470	LOC104923470	probable global transcription activator SNF2L2, transcript variant X2	401.252	0.0347631	up	0	0	0	0.32	1.17	0	0	0.496667
rna-XM_027273080.1	gene-LOC104940616	LOC104940616	E3 ubiquitin/ISG15 ligase TRIM25-like	239.284	0.0348359	up	0	0	0	0.98	0	1	0	0.66
rna-XM_027279770.1	gene-LOC104919344	LOC104919344	voltage-gated potassium channel subunit beta-2, transcript variant X6	23.89	0.0348905	up	0	0	0	0.12	0.14	0.21	0	0.156667
rna-XM_019253818.2	gene-pla2g6	pla2g6	phospholipase A2 group VI, transcript variant X1	174.264	0.0349968	up	0	0	0	0.7	0	0.43	0	0.376667
rna-XM_027276010.1	gene-LOC104921867	LOC104921867	poly(rC)-binding protein 3, transcript variant X2	24.077	0.0350209	up	0	0	0	0.05	0.08	0.1	0	0.0766667
rna-XM_027288936.1	gene-kmt2d	kmt2d	lysine methyltransferase 2D, transcript variant X2	239.416	0.0350309	up	0	0	0	0.16	0	0.13	0	0.0966667
rna-XM_019273640.2	gene-LOC104940486	LOC104940486	membrane-associated guanylate kinase, WW and PDZ domain-containing protein 2, transcript variant X1	258.358	0.0351635	up	0	0	0	0.52	0	0.26	0	0.26
rna-XM_027279877.1	gene-plxna1	plxna1	plexin A1, transcript variant X1	2.9	0.0351694	up	0.87	0.21	0.23	1.14	1.11	1.6	0.436667	1.28333
rna-XM_010736396.3	gene-rab3gap2	rab3gap2	RAB3 GTPase activating non-catalytic protein subunit 2, transcript variant X3	1.902	0.0351837	up	1.25	0.96	0.63	1.91	2.26	1.35	0.946667	1.84
rna-XM_027288743.1	gene-LOC104939665	LOC104939665	membrane cofactor protein-like, transcript variant X4	313.503	0.0352373	up	0	0	0	0	0	3.26	0	1.08667
rna-XM_010732512.3	gene-clip1	clip1	CAP-Gly domain containing linker protein 1, transcript variant X3	264.384	0.0355112	up	0	0	0	0	0.49	0.24	0	0.243333
rna-XM_019270968.2	gene-LOC104919508	LOC104919508	bile acid receptor, transcript variant X1	335.32	0.0355339	up	0	0	0	3.68	0	0	0	1.22667
rna-XM_019272763.2	gene-zc3h13	zc3h13	zinc finger CCCH-type containing 13	1.611	0.0355647	up	0.81	0.88	0.61	1.34	1.02	1.44	0.766667	1.26667
rna-XM_010755978.3	gene-sbno1	sbno1	strawberry notch homolog 1, transcript variant X2	291.887	0.0356526	up	0	0	0	0.62	0.27	0	0	0.296667
rna-XM_019255555.2	gene-LOC104929238	LOC104929238	ras-related protein Rab-26	1.767	0.0356764	up	0.95	1.02	0.82	1.89	1.63	1.53	0.93	1.68333
rna-XM_010753425.3	gene-LOC104937235	LOC104937235	cytochrome b-245 heavy chain, transcript variant X2	1.835	0.0358153	up	5.13	5.32	4.59	7.57	6.07	14.67	5.01333	9.43667
rna-XM_027282574.1	gene-LOC104922088	LOC104922088	gamma-adducin, transcript variant X10	1.852	0.0360095	up	1.18	0.66	1.3	1.75	2.57	1.61	1.04667	1.97667
rna-XM_010733696.3	gene-tacc1	tacc1	transforming acidic coiled-coil containing protein 1, transcript variant X3	228.687	0.036082	up	0	0	0	0	0.74	0.86	0	0.533333
rna-XM_027282272.1	gene-LOC104924182	LOC104924182	endoglin, transcript variant X5	245.34	0.0360932	up	0	0	0	0	1.15	0.63	0	0.593333
rna-XM_027274581.1	gene-ralgapa1	ralgapa1	Ral GTPase activating protein catalytic alpha subunit 1, transcript variant X6	2.219	0.0361376	up	1.15	0.49	0.42	1.6	1.04	2.03	0.686667	1.55667
rna-XM_019266574.2	gene-LOC104933205	LOC104933205	E3 ubiquitin/ISG15 ligase TRIM25, transcript variant X2	246.678	0.0361972	up	0	0	0	0.88	1.24	0	0	0.706667
rna-XM_027282854.1	gene-pkn1	pkn1	protein kinase N1, transcript variant X4	255.181	0.0362425	up	0	0	0	0.37	0	0.97	0	0.446667
rna-XM_027284455.1	gene-tbc1d32	tbc1d32	TBC1 domain family member 32, transcript variant X3	43.02	0.0362697	up	0	0	0	0.08	0.28	0	0	0.12
rna-XM_019273726.2	gene-rnf6	rnf6	ring finger protein 6, transcript variant X1	1.745	0.0363027	up	1.95	1.21	2.54	3.46	3.98	2.69	1.9	3.37667
rna-XM_019258646.2	gene-klhl11	klhl11	kelch like family member 11, transcript variant X3	223.328	0.0364717	up	0	0	0	0	0.76	0.62	0	0.46
rna-XM_027282179.1	gene-LOC104936388	LOC104936388	molybdopterin synthase sulfur carrier subunit-like, transcript variant X2	51.345	0.0367893	up	0.14	0	0	6.57	5.36	0	0.0466667	3.97667
rna-XM_019254715.2	gene-nsd3	nsd3	nuclear receptor binding SET domain protein 3, transcript variant X2	265.723	0.0367956	up	0	0	0	0	0.17	0.48	0	0.216667
rna-XM_010729412.3	gene-LOC104917848	LOC104917848	tropomyosin alpha-1 chain, transcript variant X3	1.708	0.0368961	up	4.39	7.46	7.72	8.56	11.78	14.02	6.52333	11.4533
rna-XM_019258217.2	gene-LOC104933811	LOC104933811	carbohydrate sulfotransferase 6-like, transcript variant X2	215.671	0.0369057	up	0	0	0	0.25	0	0.43	0	0.226667
rna-XM_027289539.1	gene-LOC104921044	LOC104921044	calcium/calmodulin-dependent protein kinase type II subunit gamma, transcript variant X3	238.838	0.0372298	up	0	0	0	0.74	0.41	0	0	0.383333
rna-XM_010744837.3	gene-pglyrp2	pglyrp2	peptidoglycan recognition protein 2, transcript variant X1	3.091	0.0373579	up	1.96	1.5	1.37	7.47	1.41	6.34	1.61	5.07333
rna-XM_019275843.2	gene-uaca	uaca	uveal autoantigen with coiled-coil domains and ankyrin repeats	250.168	0.0374858	up	0	0	0	0	0.22	0.62	0	0.28
rna-XM_027290368.1	gene-hps3	hps3	HPS3, biogenesis of lysosomal organelles complex 2 subunit 1, transcript variant X2	39.139	0.0375767	up	0	0	0	0.18	0.19	0	0	0.123333
rna-XM_027285610.1	gene-LOC104930707	LOC104930707	progestin and adipoQ receptor family member 4, transcript variant X3	232.462	0.0376022	up	0	0	0	1.02	0.56	0	0	0.526667
rna-XM_027285071.1	gene-LOC104920984	LOC104920984	probable cation-transporting ATPase 13A3, transcript variant X7	340.39	0.0376089	up	0	0	0	0.22	0	1.26	0	0.493333
rna-XM_010750992.3	gene-LOC104935186	LOC104935186	acyl-CoA-binding domain-containing protein 4, transcript variant X1	2.749	0.0376221	up	1.85	1.49	0.63	4.04	5.28	1.79	1.32333	3.70333
rna-XM_019256275.2	gene-acsl3	acsl3	acyl-CoA synthetase long chain family member 3, transcript variant X3	217.736	0.0376244	up	0	0	0	0.86	0	0.4	0	0.42
rna-XM_019265041.2	gene-LOC104935379	LOC104935379	probable glutamate receptor	2.44	0.037944	up	3.37	1.28	1.02	4.62	3.82	5.58	1.89	4.67333
rna-XM_010729250.3	gene-LOC104917724	LOC104917724	von Willebrand factor C domain-containing protein 2-like	2.472	0.0379758	up	0.34	0.29	0.44	0.67	0.98	1.08	0.356667	0.91
rna-XM_010737936.3	gene-LOC104924550	LOC104924550	hypothetical protein	1.653	0.0380972	up	5.44	8.82	7.14	10.99	14.49	10.69	7.13333	12.0567
rna-XM_027283421.1	gene-LOC104926852	LOC104926852	hemicentin-1, transcript variant X1	1.54	0.038121	up	7.56	5	6.15	9.77	7.41	12.15	6.23667	9.77667
rna-XM_027275669.1	gene-LOC104933535	LOC104933535	extracellular sulfatase Sulf-2, transcript variant X9	219.7	0.0381693	up	0	0	0	0.36	0.61	0	0	0.323333
rna-XM_019262900.2	gene-LOC104930958	LOC104930958	vacuolar fusion protein MON1 homolog B, transcript variant X2	21.275	0.0381928	up	0.12	0	0	1.18	1.25	0.24	0.04	0.89
rna-XM_019264981.2	gene-LOC104918625	LOC104918625	zinc finger protein 2, transcript variant X1	203.259	0.0381944	up	0	0	0	0	1.69	1.07	0	0.92
rna-XM_010754533.3	gene-LOC104938176	LOC104938176	histone-lysine N-methyltransferase Smyd1	30.196	0.0382025	up	0	0	0	0.07	0.27	0.07	0	0.136667
rna-XM_010731846.3	gene-LOC104919765	LOC104919765	polycomb protein SCMH1, transcript variant X4	235.141	0.0382069	up	0	0	0	0	0.33	0.92	0	0.416667
rna-XR_003461684.1	gene-LOC104918999	LOC104918999	coiled-coil domain-containing protein 158, transcript variant X2	237.127	0.0383208	up	0	0	0	1.2	0	0.38	0	0.526667
rna-XM_027291260.1	gene-LOC104936109	LOC104936109	voltage-dependent R-type calcium channel subunit alpha-1E, transcript variant X5	24.417	0.0383947	up	0	0	0	0.01	0.02	0.03	0	0.02
rna-XM_019260053.2	gene-LOC104935439	LOC104935439	echinoderm microtubule-associated protein-like 6, transcript variant X2	204.172	0.0384214	up	0	0	0	0.31	0.31	0	0	0.206667
rna-XM_019257070.2	gene-LOC104937576	LOC104937576	protein NLRC3, transcript variant X5	191.049	0.0385396	up	0	0	0	0.64	0	0.39	0	0.343333
rna-XM_027276885.1	gene-LOC104939709	LOC104939709	serine/threonine-protein kinase ppk4, transcript variant X5	191.26	0.0385682	up	0	0	0	0	0.64	0.82	0	0.486667
rna-XM_010732707.3	gene-LOC104920442	LOC104920442	angiopoietin-2	1.52	0.0385905	up	2.41	3.06	2.77	5.45	4.04	3.33	2.74667	4.27333
rna-XM_027276960.1	gene-LOC109141242	LOC109141242	major histocompatibility complex class I-related gene protein-like, transcript variant X6	23.41	0.0386073	up	0	0	0	0.25	0.13	0.1	0	0.16
rna-XM_010748725.3	gene-ndufaf3	ndufaf3	NADH:ubiquinone oxidoreductase complex assembly factor 3	2.195	0.0386366	up	3.64	2.12	2.05	5.26	7.9	4.24	2.60333	5.8
rna-XM_027273120.1	gene-LOC113744015	LOC113744015	angiopoietin-related protein 7-like	1.797	0.0386376	up	1.31	2.3	2.7	3.33	3.85	4.49	2.10333	3.89
rna-XM_027278727.1	gene-LOC104929631	LOC104929631	protein jagged-2, transcript variant X2	266.085	0.0386819	up	0	0	0	0	0.74	0.19	0	0.31
rna-XR_003463627.1	gene-zhx1	zhx1	zinc fingers and homeoboxes 1, transcript variant X2	63.744	0.0387511	up	0	0	0	0.04	0	0.56	0	0.2
rna-XM_019253312.2	gene-sun1	sun1	Sad1 and UNC84 domain containing 1, transcript variant X4	179.793	0.0387692	up	0	0	0	0.41	0	0.36	0	0.256667
rna-XM_019256820.2	gene-ncln	ncln	nicalin, transcript variant X3	21.366	0.0388195	up	0	0.1	0	1.21	1.01	0.19	0.0333333	0.803333
rna-XM_019261643.2	gene-lama2	lama2	laminin subunit alpha 2, transcript variant X3	311.919	0.0388793	up	0	0	0	0.53	0	0.09	0	0.206667
rna-XM_010737876.3	gene-LOC104924511	LOC104924511	metalloproteinase inhibitor 3	1.59	0.0390677	up	6.43	5.48	4.11	7.5	6.67	11.9	5.34	8.69
rna-XM_027290036.1	gene-dock7	dock7	dedicator of cytokinesis 7, transcript variant X11	206.982	0.0392312	up	0	0	0	0	0.18	0.44	0	0.206667
rna-XM_019255480.2	gene-LOC104925339	LOC104925339	transmembrane protein 163, transcript variant X3	255.577	0.0392388	up	0	0	0	0.23	0.81	0	0	0.346667
rna-XM_019267796.2	gene-LOC104927908	LOC104927908	membrane-associated guanylate kinase, WW and PDZ domain-containing protein 1, transcript variant X5	187.916	0.0392437	up	0	0	0	0.2	0	0.41	0	0.203333
rna-XM_010741560.3	gene-zzz3	zzz3	zinc finger ZZ-type containing 3, transcript variant X1	237.522	0.0392699	up	0	0	0	0	0	1.37	0	0.456667
rna-XM_027287783.1	gene-dysf	dysf	dysferlin, transcript variant X3	180.356	0.0393082	up	0	0	0	0	0.17	0.19	0	0.12
rna-XM_019274368.2	gene-safb2	safb2	scaffold attachment factor B2, transcript variant X1	1.841	0.0393249	up	8.83	4.6	4.84	11.8	7.24	15.19	6.09	11.41
rna-XM_027281698.1	gene-mybpc3	mybpc3	myosin binding protein C, cardiac, transcript variant X2	180.203	0.0394081	up	0	0	0	0	0.52	0.43	0	0.316667
rna-XM_019262052.1	gene-LOC104918291	LOC104918291	dipeptidyl aminopeptidase-like protein 6, transcript variant X5	1.921	0.0395021	up	1.35	0.88	1.64	2.24	3.5	1.86	1.29	2.53333
rna-XM_019273906.2	gene-LOC104919939	LOC104919939	rap guanine nucleotide exchange factor 3, transcript variant X2	3.39	0.0395787	up	0.48	1.35	0.33	1.58	4.44	1.53	0.72	2.51667
rna-XM_027288714.1	gene-bgn	bgn	biglycan, transcript variant X1	2.846	0.0396286	up	0.76	0.63	0.64	2.42	2.02	1.49	0.676667	1.97667
rna-XM_027291217.1	gene-kansl1l	kansl1l	KAT8 regulatory NSL complex subunit 1 like, transcript variant X1	187.058	0.0396694	up	0	0	0	0.49	0.5	0	0	0.33
rna-XM_027281793.1	gene-dmxl2	dmxl2	Dmx like 2, transcript variant X11	169.054	0.0396859	up	0	0	0	0.15	0	0.18	0	0.11
rna-XM_027274276.1	gene-rttn	rttn	rotatin, transcript variant X2	191.737	0.0397113	up	0	0	0	0.25	0.36	0	0	0.203333
rna-XM_027274718.1	gene-runx3	runx3	runt related transcription factor 3, transcript variant X2	1.964	0.0397456	up	2.87	1.61	3.15	3.5	4.02	7.8	2.54333	5.10667
rna-XM_010744561.3	gene-LOC104929923	LOC104929923	dixin-A, transcript variant X2	19.517	0.0397615	up	0.03	0	0	0.07	0.31	0.24	0.01	0.206667
rna-XM_019274585.2	gene-mcfd2	mcfd2	multiple coagulation factor deficiency 2, transcript variant X2	4.25	0.0398024	up	1.42	1.97	0.14	4.44	5.34	5.62	1.17667	5.13333
rna-XM_019256067.2	gene-hhip	hhip	hedgehog interacting protein, transcript variant X2	2.082	0.0398915	up	0.72	0.77	0.35	1.28	1.43	1.2	0.613333	1.30333
rna-XM_027290035.1	gene-dock7	dock7	dedicator of cytokinesis 7, transcript variant X8	13.061	0.0398976	up	0.06	0.01	0	0.65	0.18	0.19	0.0233333	0.34
rna-XM_027272738.1	gene-LOC104940620	LOC104940620	pleckstrin homology domain-containing family A member 5, transcript variant X8	187.824	0.0400579	up	0	0	0	0.52	0.35	0	0	0.29
rna-XM_010737887.3	gene-rpap3	rpap3	RNA polymerase II associated protein 3, transcript variant X1	178.197	0.0400671	up	0	0	0	0	0.83	0.54	0	0.456667
rna-XM_027291805.1	gene-atp8a1	atp8a1	ATPase phospholipid transporting 8A1, transcript variant X2	186.26	0.0401224	up	0	0	0	0.24	0.35	0	0	0.196667
rna-XM_010738293.3	gene-LOC104924828	LOC104924828	TIR domain-containing adapter molecule 1, transcript variant X1	2.692	0.0402155	up	3.34	1.18	0.76	5.25	5.76	3.36	1.76	4.79
rna-XM_010738133.3	gene-LOC104924699	LOC104924699	ATP-dependent 6-phosphofructokinase, platelet type, transcript variant X2	159.767	0.0402217	up	0	0	0	0.31	0.84	0	0	0.383333
rna-XM_010738763.3	gene-LOC104925195	LOC104925195	ephrin-B2	1.599	0.0403479	up	2.9	2.31	1.64	3.16	4.03	3.99	2.28333	3.72667
rna-XM_019259905.2	gene-ntrk2	ntrk2	neurotrophic receptor tyrosine kinase 2, transcript variant X2	2.314	0.0404242	up	0.34	0.35	0.17	0.97	0.59	0.49	0.286667	0.683333
rna-XM_019266308.2	gene-ggps1	ggps1	geranylgeranyl diphosphate synthase 1, transcript variant X4	288.36	0.0404313	up	0	0	0	3.1	0.59	0	0	1.23
rna-XM_019277068.2	gene-kalrn	kalrn	kalirin RhoGEF kinase, transcript variant X1	170.014	0.0405791	up	0	0	0	0	0.16	0.11	0	0.09
rna-XM_027284127.1	gene-epha7	epha7	EPH receptor A7, transcript variant X4	176.966	0.0406016	up	0	0	0	0.31	0.26	0	0	0.19
gene-LOC113745126	gene-LOC113745126	LOC113745126	-	1.526	0.0406058	up	51.33	60.9	37.71	65.42	69.85	95.5	49.98	76.9233
rna-XM_027277855.1	gene-LOC104930056	LOC104930056	WASH complex subunit 2-like, transcript variant X5	258.035	0.040638	up	0	0	0	0	1	0.2	0	0.4
rna-XM_027284828.1	gene-LOC104931116	LOC104931116	protein TANC2, transcript variant X5	158.229	0.0406914	up	0	0	0	0.19	0	0.2	0	0.13
rna-XM_027288123.1	gene-frem1	frem1	FRAS1 related extracellular matrix 1, transcript variant X3	162.236	0.0407051	up	0	0	0	0.27	0	0.19	0	0.153333
rna-XM_019264938.2	gene-LOC104926607	LOC104926607	collagen type IV alpha-3-binding protein, transcript variant X7	2.482	0.0407332	up	1.9	0.76	0.5	2.08	2.62	3.26	1.05333	2.65333
rna-XM_019256481.2	gene-tbl1xr1	tbl1xr1	transducin beta like 1 X-linked receptor 1, transcript variant X3	175.938	0.0407367	up	0	0	0	0.43	0.34	0	0	0.256667
rna-XM_027291684.1	gene-jam2	jam2	junctional adhesion molecule 2, transcript variant X3	1.556	0.0407759	up	5.01	2.91	2.88	5.88	5.63	5.58	3.6	5.69667
rna-XM_027290653.1	gene-cherp	cherp	calcium homeostasis endoplasmic reticulum protein, transcript variant X1	165.339	0.0408059	up	0	0	0	0.65	0	0.38	0	0.343333
rna-XM_019273927.2	gene-LOC109141883	LOC109141883	platelet endothelial cell adhesion molecule-like, transcript variant X7	1.749	0.0408882	up	1.97	1.51	1.35	2.58	2.25	3.79	1.61	2.87333
rna-XM_010743026.3	gene-hs3st1	hs3st1	heparan sulfate-glucosamine 3-sulfotransferase 1	1.773	0.0409467	up	5.28	5.69	2.51	9.09	6.99	8.34	4.49333	8.14
rna-XM_010745890.3	gene-LOC104930979	LOC104930979	disintegrin and metalloproteinase domain-containing protein 11, transcript variant X3	170.568	0.0411142	up	0	0	0	0.77	0.7	0	0	0.49
rna-XM_019260390.2	gene-arhgap5	arhgap5	Rho GTPase activating protein 5, transcript variant X2	170.484	0.0414077	up	0	0	0	0.4	0.29	0	0	0.23
rna-XM_019262350.2	gene-rasgrp2	rasgrp2	RAS guanyl releasing protein 2, transcript variant X3	1.726	0.0415183	up	1.84	1.73	3.61	4.53	3.86	4.31	2.39333	4.23333
rna-XM_027289206.1	gene-LOC109138257	LOC109138257	uncharacterized LOC109138257, transcript variant X1	156.303	0.0417639	up	0	0	0	0	1.16	0.91	0	0.69
rna-XM_019277658.2	gene-LOC104919104	LOC104919104	protein-glutamine gamma-glutamyltransferase K	3.48	0.0419137	up	0.39	0.15	0.15	0.65	0.69	1.12	0.23	0.82
rna-XM_019272556.2	gene-LOC104919270	LOC104919270	plexin-A1, transcript variant X1	150.466	0.041924	up	0	0	0	0.14	0	0.21	0	0.116667
rna-XM_027275713.1	gene-akap11	akap11	A-kinase anchoring protein 11, transcript variant X6	218.027	0.0419367	up	0	0	0	0.12	0.45	0	0	0.19
rna-XM_019276034.2	gene-LOC104922613	LOC104922613	janus kinase and microtubule-interacting protein 1, transcript variant X2	243.255	0.0419619	up	0	0	0	0	0.64	0.12	0	0.253333
rna-XM_019261674.2	gene-LOC104926828	LOC104926828	calcium-regulated heat stable protein 1, transcript variant X1	2.172	0.0419774	up	3.28	2.08	4.89	11.09	5.74	5.79	3.41667	7.54
gene-LOC113745000	gene-LOC113745000	LOC113745000	-	19.237	0.0420369	up	0	0	0	0.24	0.17	0.15	0	0.186667
rna-XM_019258462.2	gene-LOC104919402	LOC104919402	transmembrane anterior posterior transformation protein 1 homolog, transcript variant X1	197.187	0.0421222	up	0	0	0	0.19	0	0.78	0	0.323333
rna-XM_027276890.1	gene-LOC104939709	LOC104939709	serine/threonine-protein kinase ppk4, transcript variant X6	1.532	0.0421989	up	2.77	2.16	2.65	4.96	2.83	4.06	2.52667	3.95
rna-XM_027277482.1	gene-hdac4	hdac4	histone deacetylase 4, transcript variant X1	152.731	0.0422146	up	0	0	0	0	0.16	0.22	0	0.126667
rna-XM_027275303.1	gene-LOC104939700	LOC104939700	sodium bicarbonate cotransporter 3	161.91	0.0422176	up	0	0	0	0.3	0.42	0	0	0.24
rna-XM_010737919.3	gene-angptl2	angptl2	angiopoietin like 2	1.978	0.0422257	up	2.88	1.23	1.26	3.9	3.09	3.79	1.79	3.59333
rna-XM_010754334.3	gene-aadat	aadat	aminoadipate aminotransferase, transcript variant X1	2.078	0.0422354	up	0.89	0.92	1.02	2.64	1.65	1.74	0.943333	2.01
rna-XM_010733368.3	gene-LOC104920956	LOC104920956	plasmalemma vesicle-associated protein-like, transcript variant X1	1.549	0.0422576	up	60.51	79.4	54.18	74.7	96.61	137.44	64.6967	102.917
rna-XM_027280505.1	gene-lsamp	lsamp	limbic system associated membrane protein, transcript variant X2	150.912	0.0423938	up	0	0	0	0	0.38	0.29	0	0.223333
rna-XM_027274075.1	gene-mpp7	mpp7	membrane palmitoylated protein 7, transcript variant X2	150.721	0.0426332	up	0	0	0	0	0.3	0.46	0	0.253333
rna-XM_027277668.1	gene-mpdz	mpdz	multiple PDZ domain crumbs cell polarity complex component, transcript variant X11	2.837	0.0428184	up	0.24	0.11	0.11	0.25	0.58	0.52	0.153333	0.45
rna-XM_019277020.2	gene-mia3	mia3	MIA SH3 domain ER export factor 3, transcript variant X4	146.506	0.0429713	up	0	0	0	0	0.25	0.35	0	0.2
rna-XM_019264300.2	gene-aste1	aste1	asteroid homolog 1, transcript variant X2	2.459	0.0429971	up	0.41	0.28	0.35	0.95	0.7	0.97	0.346667	0.873333
rna-XM_027284116.1	gene-LOC104938686	LOC104938686	suppressor of cytokine signaling 2, transcript variant X3	142.24	0.0431295	up	0	0	0	1.06	0	0.67	0	0.576667
rna-XM_027275958.1	gene-setd5	setd5	SET domain containing 5, transcript variant X1	210.281	0.0432142	up	0	0	0	0.5	0.12	0	0	0.206667
rna-XM_027282571.1	gene-LOC104922088	LOC104922088	gamma-adducin, transcript variant X7	169.124	0.0432661	up	0	0	0	0.18	0	0.58	0	0.253333
rna-XM_019264285.2	gene-LOC104923114	LOC104923114	protein CBFA2T1, transcript variant X3	144.728	0.0434818	up	0	0	0	0	0.4	0.26	0	0.22
rna-XM_027286082.1	gene-vwde	vwde	von Willebrand factor D and EGF domains, transcript variant X2	147.75	0.0435513	up	0	0	0	0.25	0.22	0	0	0.156667
rna-XM_019261928.2	gene-micall2	micall2	MICAL like 2, transcript variant X1	203.958	0.0436125	up	0	0	0	0.24	1	0	0	0.413333
rna-XM_019253881.2	gene-acsf3	acsf3	acyl-CoA synthetase family member 3, transcript variant X5	153.722	0.0436993	up	0	0	0	0.73	0.42	0	0	0.383333
rna-XM_027273901.1	gene-LOC104919726	LOC104919726	unconventional myosin-Ic, transcript variant X1	181.856	0.0438267	up	0	0	0	0.24	0.78	0	0	0.34
rna-XR_003464063.1	gene-LOC104928082	LOC104928082	small conductance calcium-activated potassium channel protein 2, transcript variant X2	135.253	0.0440111	up	0	0	0	0	0.3	0.36	0	0.22
rna-XM_010754553.3	gene-LOC104938193	LOC104938193	platelet-derived growth factor subunit A	24.529	0.0440125	up	0	0	0	0.03	0.19	0.1	0	0.106667
rna-XM_019254428.2	gene-clstn1	clstn1	calsyntenin 1, transcript variant X2	138.935	0.0440171	up	0	0	0	0.36	0	0.19	0	0.183333
rna-XM_027275606.1	gene-LOC104937449	LOC104937449	polymeric immunoglobulin receptor-like, transcript variant X1	1.724	0.0440894	up	2.19	3.09	1.89	3.77	3.57	5.35	2.39	4.23
rna-XM_019268362.2	gene-elmsan1	elmsan1	ELM2 and Myb/SANT domain containing 1, transcript variant X2	1.515	0.0441167	up	1.12	0.84	1.45	1.85	1.53	1.91	1.13667	1.76333
rna-XM_019258481.2	gene-LOC104920614	LOC104920614	CXXC-type zinc finger protein 5, transcript variant X1	2.555	0.0441606	up	0.45	0.44	0.5	1.36	1.22	1.08	0.463333	1.22
rna-XM_027284664.1	gene-LOC104937737	LOC104937737	uncharacterized LOC104937737, transcript variant X4	143.298	0.0443255	up	0	0	0	0	0.44	0.88	0	0.44
rna-XM_027279789.1	gene-magi1	magi1	membrane associated guanylate kinase, WW and PDZ domain containing 1, transcript variant X10	3.515	0.0443458	up	0.19	0.24	0.1	0.33	0.36	1.22	0.176667	0.636667
rna-XM_019279182.2	gene-LOC104930287	LOC104930287	serine/threonine-protein kinase Nek8, transcript variant X1	24.892	0.0444776	up	0	0	0	0.07	0.12	0.02	0	0.07
rna-XM_019266041.2	gene-LOC104938457	LOC104938457	calcium/calmodulin-dependent 3',5'-cyclic nucleotide phosphodiesterase 1A, transcript variant X1	3.208	0.0444824	up	0.3	0.15	0.22	0.79	0.62	0.77	0.223333	0.726667
rna-XM_019262301.2	gene-LOC104929675	LOC104929675	voltage-dependent calcium channel beta subunit-associated regulatory protein, transcript variant X1	132.865	0.0444829	up	0	0	0	0.3	0	0.17	0	0.156667
rna-XM_027286887.1	gene-tti2	tti2	TELO2 interacting protein 2, transcript variant X2	366.839	0.0446567	up	0	0	0	4.45	0	0.31	0	1.58667
rna-XM_019275443.2	gene-ewsr1	ewsr1	EWS RNA binding protein 1, transcript variant X3	185.171	0.0446993	up	0	0	0	0	0.28	1.82	0	0.7
rna-XM_010736111.3	gene-triqk	triqk	triple QxxK/R motif containing, transcript variant X2	2.952	0.0447397	up	0.4	0.41	0.5	0.86	0.89	2.24	0.436667	1.33
rna-XM_027275131.1	gene-meis2	meis2	Meis homeobox 2, transcript variant X4	35.635	0.0448971	up	0.01	0	0	0.25	0	0.23	0.00333333	0.16
rna-XM_027274846.1	gene-arel1	arel1	apoptosis resistant E3 ubiquitin protein ligase 1, transcript variant X3	122.678	0.0449357	up	0	0	0	0.23	0	0.28	0	0.17
rna-XM_019254941.2	gene-LOC104917954	LOC104917954	rho guanine nucleotide exchange factor 10-like protein, transcript variant X2	1.7	0.0450812	up	1.02	0.53	1.2	1.54	1.55	1.68	0.916667	1.59
rna-XM_010732294.3	gene-stard10	stard10	StAR related lipid transfer domain containing 10, transcript variant X1	1.723	0.0451783	up	3.39	1.99	1.82	4.96	4.28	3.37	2.4	4.20333
rna-XM_010752748.3	gene-LOC104936677	LOC104936677	von Willebrand factor A domain-containing protein 1	1.509	0.0451983	up	3.88	5.23	5.6	8.89	8.18	5.66	4.90333	7.57667
rna-XM_019265334.2	gene-casp2	casp2	caspase 2, transcript variant X1	125.323	0.0452127	up	0	0	0	0	0.44	0.42	0	0.286667
rna-XM_027276766.1	gene-LOC113745247	LOC113745247	chromatin complexes subunit BAP18-like, transcript variant X2	119.884	0.0452413	up	0	0	0	1.09	0	1.12	0	0.736667
rna-XM_019273092.2	gene-taok2	taok2	TAO kinase 2, transcript variant X3	15.843	0.0453704	up	0.02	0	0	0.07	0.09	0.13	0.00666667	0.0966667
rna-XM_027288854.1	gene-ttpal	ttpal	alpha tocopherol transfer protein like, transcript variant X1	118.927	0.0454463	up	0	0	0	0.6	0	0.53	0	0.376667
rna-XM_027278702.1	gene-syne2	syne2	spectrin repeat containing nuclear envelope protein 2, transcript variant X1	134.351	0.0454475	up	0	0	0	0.17	0.12	0	0	0.0966667
rna-XM_027278703.1	gene-syne2	syne2	spectrin repeat containing nuclear envelope protein 2, transcript variant X2	134.351	0.0454475	up	0	0	0	0.17	0.12	0	0	0.0966667
rna-XM_027287304.1	gene-LOC113747463	LOC113747463	hamartin-like, transcript variant X1	157.435	0.0454639	up	0	0	0	0	0.24	0.81	0	0.35
rna-XM_010747885.3	gene-LOC104932611	LOC104932611	hepcidin	2.102	0.0455094	up	49.68	30.17	17.4	99.5	45.53	61.11	32.4167	68.7133
rna-XM_019273782.2	gene-znf217	znf217	zinc finger protein 217, transcript variant X3	138.01	0.0456474	up	0	0	0	0	0.31	0.75	0	0.353333
rna-XM_027275722.1	gene-LOC104938490	LOC104938490	gamma-aminobutyric acid type B receptor subunit 2, transcript variant X1	91.237	0.0458717	up	0	0	0	1.28	0	0.66	0	0.646667
rna-XM_019278222.2	gene-LOC104926067	LOC104926067	VIP36-like protein, transcript variant X1	148.026	0.0459635	up	0	0	0	0	0.23	0.71	0	0.313333
rna-XM_019260313.2	gene-sned1	sned1	sushi, nidogen and EGF like domains 1, transcript variant X2	138.944	0.0460326	up	0	0	0	0.47	0	0.17	0	0.213333
rna-XM_027287503.1	gene-LOC104932676	LOC104932676	cadherin-7, transcript variant X1	119.302	0.0460683	up	0	0	0	0	0.32	0.36	0	0.226667
rna-XM_027277902.1	gene-LOC104931147	LOC104931147	bone morphogenetic protein 1	1.58	0.0460764	up	5.86	3.46	3.29	8.6	5.87	5.81	4.20333	6.76
rna-XM_019259668.2	gene-LOC104930952	LOC104930952	zinc finger MIZ domain-containing protein 1, transcript variant X4	124.631	0.0460978	up	0	0	0	0	0.25	0.43	0	0.226667
rna-XM_019263263.2	gene-LOC104921945	LOC104921945	rho GTPase-activating protein 7	1.842	0.0461158	up	0.53	0.5	0.4	0.98	0.88	0.82	0.476667	0.893333
rna-XM_027280934.1	gene-LOC104939912	LOC104939912	von Willebrand factor A domain-containing protein 5A-like, transcript variant X1	127.13	0.0461368	up	0	0	0	0.5	0.39	0	0	0.296667
rna-XM_027282696.1	gene-LOC104920031	LOC104920031	uncharacterized LOC104920031, transcript variant X4	32.543	0.0462462	up	0.01	0	0	0.52	0	0.19	0.00333333	0.236667
rna-XM_027273091.1	gene-LOC104940260	LOC104940260	ras and EF-hand domain-containing protein homolog, transcript variant X5	159.522	0.0462703	up	0	0	0	0.17	0.59	0	0	0.253333
rna-XM_019272800.2	gene-cpeb3	cpeb3	cytoplasmic polyadenylation element binding protein 3, transcript variant X3	156.63	0.0462853	up	0	0	0	0.34	0.11	0	0	0.15
rna-XM_027274214.1	gene-smchd1	smchd1	structural maintenance of chromosomes flexible hinge domain containing 1, transcript variant X2	145.738	0.0463067	up	0	0	0	0.36	0.14	0	0	0.166667
rna-XM_010740122.3	gene-phospho1	phospho1	phosphoethanolamine/phosphocholine phosphatase, transcript variant X1	129.516	0.0463079	up	0	0	0	0	0.92	0.44	0	0.453333
rna-XM_019277566.2	gene-LOC109136672	LOC109136672	LIM and senescent cell antigen-like-containing domain protein 1, transcript variant X4	1.719	0.0464312	up	2.84	1.78	1.74	5.02	3.06	3.03	2.12	3.70333
rna-XM_019269349.2	gene-adamts14	adamts14	ADAM metallopeptidase with thrombospondin type 1 motif 14, transcript variant X1	124.179	0.0464372	up	0	0	0	0.29	0.33	0	0	0.206667
rna-XM_019259600.2	gene-LOC104935903	LOC104935903	serine/threonine-protein kinase BRSK2, transcript variant X3	138.99	0.0464574	up	0	0	0	0.35	0.15	0	0	0.166667
rna-XM_010747815.3	gene-LOC104932547	LOC104932547	rho guanine nucleotide exchange factor 25, transcript variant X2	1.53	0.0464655	up	1.64	1.83	1.1	2.21	2.4	2.55	1.52333	2.38667
rna-XM_027277637.1	gene-LOC104921320	LOC104921320	synaptopodin-2-like, transcript variant X2	1.508	0.0464873	up	1.85	2.11	1.92	2.11	2.99	4.01	1.96	3.03667
rna-XM_019274619.2	gene-emid1	emid1	EMI domain containing 1, transcript variant X3	1.674	0.0465225	up	1.2	1.08	1.04	2.02	1.71	1.95	1.10667	1.89333
rna-XM_010731531.3	gene-LOC104919493	LOC104919493	putative uncharacterized protein MYH16, transcript variant X1	128.848	0.0465736	up	0	0	0	0.38	0.23	0	0	0.203333
rna-XM_019276750.2	gene-abhd12	abhd12	abhydrolase domain containing 12, transcript variant X6	112.481	0.0467023	up	0	0	0	0.69	0	0.99	0	0.56
rna-XM_019275808.2	gene-myo9a	myo9a	myosin IXA, transcript variant X4	112.822	0.0467578	up	0	0	0	0.1	0	0.15	0	0.0833333
rna-XM_019274906.2	gene-tnip2	tnip2	TNFAIP3 interacting protein 2, transcript variant X2	1.953	0.0467812	up	1.07	1.34	2.45	2.95	2.88	3.93	1.62	3.25333
rna-XM_019254595.2	gene-ate1	ate1	arginyltransferase 1, transcript variant X2	124.289	0.046784	up	0	0	0	1.05	0.72	0	0	0.59
rna-XM_019270722.2	gene-pde1b	pde1b	phosphodiesterase 1B	1.681	0.0468406	up	2.25	2.6	2.72	3.4	3.61	6.05	2.52333	4.35333
rna-XM_027287212.1	gene-LOC104919610	LOC104919610	DENN domain-containing protein 3, transcript variant X3	125.896	0.0469313	up	0	0	0	0.2	0.34	0	0	0.18
rna-XM_010732177.3	gene-LOC104920025	LOC104920025	protocadherin alpha-C2-like, transcript variant X1	1.59	0.0469606	up	2.03	1.37	1.1	2.83	2.51	1.94	1.5	2.42667
rna-XM_019265609.2	gene-nav3	nav3	neuron navigator 3, transcript variant X8	46.411	0.0469962	up	0	0	0.01	0.49	0.26	0	0.00333333	0.25
gene-LOC113746670	gene-LOC113746670	LOC113746670	-	11.852	0.0470139	up	0	0.04	0.01	0.17	0.47	0.21	0.0166667	0.283333
rna-XM_019266757.2	gene-depdc5	depdc5	DEP domain containing 5, transcript variant X7	139.589	0.047198	up	0	0	0	0	0.45	0.14	0	0.196667
rna-XM_027280231.1	gene-trip12	trip12	thyroid hormone receptor interactor 12, transcript variant X11	113.638	0.0472547	up	0	0	0	0	0.18	0.25	0	0.143333
rna-XM_010734741.3	gene-LOC104922035	LOC104922035	elastase-1	53.633	0.0472626	up	0.32	0	0.22	0.14	30.13	0.2	0.18	10.1567
rna-XM_019265413.2	gene-LOC109139987	LOC109139987	small integral membrane protein 29, transcript variant X2	119.985	0.0473413	up	0	0	0	0.39	0	0.92	0	0.436667
rna-XM_019258271.2	gene-dusp27	dusp27	dual specificity phosphatase 27, atypical, transcript variant X2	11.53	0.0473635	up	0	0	0	0.04	0.01	0.06	0	0.0366667
rna-XM_019277215.2	gene-LOC104928860	LOC104928860	synaptotagmin-7, transcript variant X3	105.747	0.0474983	up	0	0	0	0.1	0	0.1	0	0.0666667
rna-XM_010736283.3	gene-LOC104923242	LOC104923242	hypothetical protein, transcript variant X1	1.857	0.0476189	up	5.08	3.31	2.22	6.63	5.59	7.79	3.53667	6.67
rna-XM_019271883.2	gene-LOC109141477	LOC109141477	ETS translocation variant 5, transcript variant X3	110.246	0.0477205	up	0	0	0	0	0.51	0.39	0	0.3
rna-XM_010756845.3	gene-LOC104940277	LOC104940277	RIB43A-like with coiled-coils protein 2	21.035	0.0478659	up	0	0	0	0.12	0.06	0.28	0	0.153333
rna-XM_010751943.3	gene-plcd4	plcd4	phospholipase C delta 4, transcript variant X1	1.628	0.0479205	up	3.82	2.55	1.88	5.25	3.61	4.82	2.75	4.56
rna-XM_019272431.2	gene-hook3	hook3	hook microtubule tethering protein 3, transcript variant X1	161.782	0.0480291	up	0	0	0	0.09	0	0.53	0	0.206667
rna-XM_027281512.1	gene-usp8	usp8	ubiquitin specific peptidase 8, transcript variant X2	110.134	0.0480749	up	0	0	0	0	0.31	0.2	0	0.17
rna-XM_027287205.1	gene-scmh1	scmh1	Scm polycomb group protein homolog 1, transcript variant X7	135.515	0.0480949	up	0	0	0	0.75	0	0.2	0	0.316667
rna-XM_027288952.1	gene-mgll	mgll	monoglyceride lipase, transcript variant X2	1.947	0.048162	up	0.99	2	2.74	2.81	3.75	4.96	1.91	3.84
rna-XM_010755703.3	gene-LOC104939201	LOC104939201	ELAV-like protein 1, transcript variant X4	135.718	0.0482139	up	0	0	0	0	0	1.39	0	0.463333
rna-XM_010742127.3	gene-stx18	stx18	syntaxin 18	1.552	0.0482298	up	4.03	6.67	7.19	10.1	8.53	9.86	5.96333	9.49667
rna-XM_027280858.1	gene-pipox	pipox	pipecolic acid and sarcosine oxidase, transcript variant X2	13.436	0.0483014	up	0	0.02	0	0.13	0.16	0.12	0.00666667	0.136667
rna-XM_027281204.1	gene-LOC113746269	LOC113746269	FH1/FH2 domain-containing protein 3-like, transcript variant X1	121.801	0.0483074	up	0	0	0	0.19	0	0.56	0	0.25
rna-XM_027288833.1	gene-LOC104927446	LOC104927446	retinitis pigmentosa 1-like 1 protein, transcript variant X3	112.405	0.0483478	up	0	0	0	0.28	0	0.64	0	0.306667
rna-XM_019266619.2	gene-LOC104925749	LOC104925749	zinc finger protein 219-like, transcript variant X3	105.979	0.0483944	up	0	0	0	0.11	0	0.19	0	0.1
rna-XM_019276339.2	gene-LOC104926036	LOC104926036	dynactin subunit 1, transcript variant X1	110.062	0.0484768	up	0	0	0	0	0.5	0.9	0	0.466667
rna-XM_027281802.1	gene-LOC104936320	LOC104936320	uncharacterized LOC104936320, transcript variant X3	7.377	0.0486283	up	2.72	6.66	0	34.69	18.93	17.7	3.12667	23.7733
rna-XM_027288076.1	gene-LOC104925006	LOC104925006	calcium/calmodulin-dependent protein kinase type II delta chain, transcript variant X13	125.886	0.0486347	up	0	0	0	0	0.22	0.67	0	0.296667
rna-XM_019253073.2	gene-mecom	mecom	MDS1 and EVI1 complex locus, transcript variant X1	99.44	0.0487007	up	0	0	0	0.17	0	0.19	0	0.12
rna-XM_010754377.3	gene-mfsd9	mfsd9	major facilitator superfamily domain containing 9	1.954	0.048771	up	1.12	0.78	1.04	2.59	1.4	1.88	0.98	1.95667
rna-XM_019256931.2	gene-colec10	colec10	collectin subfamily member 10	5.667	0.0489315	up	0.07	0.13	0.13	0.5	0.8	0.71	0.11	0.67
rna-XM_027283156.1	gene-LOC104926858	LOC104926858	protein NLRC3, transcript variant X2	145.676	0.0489843	up	0	0	0	0.09	0	0.48	0	0.19
rna-XM_019274202.2	gene-LOC104922684	LOC104922684	muscleblind-like protein 2a, transcript variant X5	133.267	0.048989	up	0	0	0	0	0.42	0.12	0	0.18
rna-XM_019268657.2	gene-adam15	adam15	ADAM metallopeptidase domain 15, transcript variant X1	119.167	0.0492967	up	0	0	0	0.2	0	0.66	0	0.286667
rna-XM_019258864.2	gene-LOC104932486	LOC104932486	nanos homolog 1	18.62	0.0494433	up	0	0	0	0.03	0.01	0.05	0	0.03
rna-XM_010746759.3	gene-kdm1a	kdm1a	lysine demethylase 1A, transcript variant X3	1.789	0.0495729	up	0.76	0.83	1.21	1.36	1.95	1.82	0.933333	1.71
rna-XM_010733297.3	gene-LOC104920902	LOC104920902	arf-GAP domain and FG repeat-containing protein 1-like, transcript variant X1	1.576	0.0496055	up	3.61	3.28	2.74	6.68	5.35	3.45	3.21	5.16
rna-XM_027283730.1	gene-LOC104924351	LOC104924351	calcium/calmodulin-dependent protein kinase type II delta 2 chain, transcript variant X10	114.823	0.0496969	up	0	0	0	0	0.53	0.2	0	0.243333
rna-XM_027279007.1	gene-LOC104931955	LOC104931955	rho guanine nucleotide exchange factor 25, transcript variant X2	152.124	0.0497645	up	0	0	0	0.17	0	1.09	0	0.42
rna-XM_010737015.3	gene-LOC104923826	LOC104923826	high affinity cationic amino acid transporter 1, transcript variant X3	110.518	0.0498425	up	0	0	0	0.37	0	0.14	0	0.17
rna-XM_019259230.2	gene-LOC104933384	LOC104933384	solute carrier family 26 member 10	2.363	0.049949	up	1.29	0.34	0.92	1.8	2.27	2.04	0.85	2.03667
rna-XM_027288895.1	gene-LOC109138771	LOC109138771	forkhead box protein J3, transcript variant X8	96.816	0.0499705	up	0	0	0	0	0.24	0.26	0	0.166667
rna-XM_019271065.2	gene-pigp	pigp	phosphatidylinositol glycan anchor biosynthesis class P, transcript variant X3	2.562	0.0499928	up	2.39	1.23	1.6	6.14	4.07	3.32	1.74	4.51
rna-XM_027284281.1	gene-ankrd6	ankrd6	ankyrin repeat domain 6, transcript variant X11	0.002	1.91e-05	down	1.16	0.72	1.8	0	0	0	1.22667	0
rna-XM_027290473.1	gene-ranbp3	ranbp3	RAN binding protein 3, transcript variant X4	0.002	8.8e-05	down	5.82	1.47	1.87	0	0	0.01	3.05333	0.00333333
rna-XM_019265087.2	gene-tnrc18	tnrc18	trinucleotide repeat containing 18, transcript variant X3	0.001	8.91e-05	down	0.51	0.63	0.48	0	0	0	0.54	0
rna-XM_027282190.1	gene-dhx29	dhx29	DExH-box helicase 29, transcript variant X3	0.002	0.00027007	down	1.2	1.23	1.19	0	0	0	1.20667	0
rna-XM_027291950.1	gene-atp8a1	atp8a1	ATPase phospholipid transporting 8A1, transcript variant X6	0.002	0.000397679	down	0.71	0.4	0.57	0	0	0	0.56	0
rna-XM_010754320.3	gene-LOC104937995	LOC104937995	sodium- and chloride-dependent GABA transporter 2, transcript variant X2	0.225	0.000539079	down	6.67	12.89	14.2	2.8	3.05	1.97	11.2533	2.60667
rna-XM_010741552.3	gene-sgms1	sgms1	sphingomyelin synthase 1, transcript variant X1	0.47	0.000568557	down	3.62	3.39	3.86	2.02	1.67	1.54	3.62333	1.74333
rna-XM_027278967.1	gene-LOC104929060	LOC104929060	nuclear receptor subfamily 1 group D member 1, transcript variant X2	0.001	0.000703137	down	3.03	1.55	0.73	0	0	0	1.77	0
rna-XM_027273336.1	gene-ncor1	ncor1	nuclear receptor corepressor 1, transcript variant X3	0.002	0.000724678	down	0.58	0.24	0.28	0	0	0	0.366667	0
rna-XM_019262606.2	gene-LOC104935066	LOC104935066	histone deacetylase 4, transcript variant X6	0.002	0.000753059	down	0.63	0.37	0.33	0	0	0	0.443333	0
rna-XM_019259522.2	gene-gne	gne	glucosamine (UDP-N-acetyl)-2-epimerase/N-acetylmannosamine kinase, transcript variant X2	0.003	0.000825169	down	0.59	0.64	0.43	0	0	0	0.553333	0
rna-XM_010732507.3	gene-LOC104920286	LOC104920286	rab5 GDP/GTP exchange factor, transcript variant X1	0.49	0.000841314	down	18.82	16.73	13.56	6.66	9.51	8.42	16.37	8.19667
rna-XM_027283141.1	gene-lrba	lrba	LPS responsive beige-like anchor protein, transcript variant X5	0.352	0.000925356	down	0.73	0.76	0.77	0.33	0.25	0.24	0.753333	0.273333
rna-XM_027280478.1	gene-usp16	usp16	ubiquitin specific peptidase 16, transcript variant X2	0.552	0.000966317	down	21.31	26.54	26.64	16.05	13.48	12.58	24.83	14.0367
rna-XM_027286743.1	gene-wdr75	wdr75	WD repeat domain 75, transcript variant X1	0.002	0.00104061	down	0.68	0.46	1.19	0	0	0	0.776667	0
rna-XM_027291811.1	gene-fubp1	fubp1	far upstream element binding protein 1, transcript variant X4	0.342	0.00104259	down	2.99	4.24	3.9	1.58	1.42	0.91	3.71	1.30333
rna-XM_019259273.2	gene-kmt2d	kmt2d	lysine methyltransferase 2D, transcript variant X4	0.363	0.00109906	down	0.52	0.65	0.8	0.23	0.29	0.21	0.656667	0.243333
rna-XM_027283180.1	gene-LOC104933922	LOC104933922	kinesin-associated protein 3, transcript variant X2	0.002	0.00111395	down	0.35	1.35	0.99	0	0	0	0.896667	0
rna-XM_010730463.3	gene-rrm2b	rrm2b	ribonucleotide reductase regulatory TP53 inducible subunit M2B	0.644	0.00118549	down	50.44	55.26	55.49	35.01	39.53	31.47	53.73	35.3367
rna-XM_010733267.3	gene-LOC104920880	LOC104920880	inositol polyphosphate 5-phosphatase K-like, transcript variant X5	0.003	0.001294	down	0.91	0.51	0.69	0	0	0	0.703333	0
rna-XM_027283280.1	gene-LOC113746660	LOC113746660	tripartite motif-containing protein 16-like	0.568	0.00137305	down	15.09	16.46	19.85	10.77	9.88	9.2	17.1333	9.95
rna-XM_019277763.2	gene-LOC104936231	LOC104936231	alpha-N-acetylgalactosaminide alpha-2,6-sialyltransferase 2, transcript variant X2	0.544	0.00139826	down	6.87	5.79	5.11	3.74	2.99	3.13	5.92333	3.28667
rna-XM_019276616.2	gene-cep83	cep83	centrosomal protein 83, transcript variant X3	0.003	0.0014211	down	0.94	0.57	1.03	0	0	0	0.846667	0
rna-XM_019257670.2	gene-rab31	rab31	RAB31, member RAS oncogene family	0.562	0.00188101	down	9.84	10.34	9.19	6.55	4.51	5.83	9.79	5.63
rna-XM_027290519.1	gene-LOC104918499	LOC104918499	torsin-1A-interacting protein 2-like, transcript variant X1	0.332	0.00189503	down	6.89	8.77	13.01	2.67	4.28	2.81	9.55667	3.25333
rna-XM_019271618.2	gene-ncapg2	ncapg2	non-SMC condensin II complex subunit G2, transcript variant X3	0.003	0.00223858	down	0.7	0.24	0.66	0	0	0	0.533333	0
rna-XM_010749062.3	gene-ccl17	ccl17	C-C motif chemokine ligand 17	0.554	0.00230316	down	200.58	207.72	291.19	134.88	144.06	115.61	233.163	131.517
rna-XM_027274512.1	gene-LOC113744544	LOC113744544	uncharacterized LOC113744544, transcript variant X3	0.004	0.00232498	down	2.13	3.56	2.23	0	0	0	2.64	0
rna-XM_019260871.2	gene-pik3c2g	pik3c2g	phosphatidylinositol-4-phosphate 3-kinase catalytic subunit type 2 gamma, transcript variant X4	0.005	0.00248022	down	0.29	0.32	0.22	0	0	0	0.276667	0
rna-XM_027284848.1	gene-LOC104926566	LOC104926566	general transcription factor IIH subunit 2-like, transcript variant X4	0.004	0.00252407	down	1.52	2.31	1.13	0	0	0	1.65333	0
rna-XM_010744891.3	gene-ccar1	ccar1	cell division cycle and apoptosis regulator 1, transcript variant X1	0.438	0.00254899	down	2.17	2.57	2.23	0.88	0.9	1.35	2.32333	1.04333
rna-XM_019278720.2	gene-LOC104936399	LOC104936399	membrane-associated phosphatidylinositol transfer protein 2, transcript variant X1	0.001	0.00263714	down	0.77	0.08	0.71	0	0	0	0.52	0
rna-XM_019271559.2	gene-rxra	rxra	retinoid X receptor alpha, transcript variant X2	0.002	0.00269255	down	1.48	0.37	0.21	0	0	0	0.686667	0
rna-XM_027275487.1	gene-abhd12	abhd12	abhydrolase domain containing 12, transcript variant X5	0.005	0.00274496	down	0.73	1.23	0.86	0	0	0	0.94	0
rna-XM_027279101.1	gene-LOC104925372	LOC104925372	60S ribosomal protein L36a, transcript variant X2	0.397	0.00278665	down	536.87	454.89	385.08	106.99	216.31	220.25	458.947	181.183
rna-XM_010735334.3	gene-adar	adar	adenosine deaminase, RNA specific, transcript variant X3	0.473	0.00279183	down	5.17	6.2	5.21	3.5	2.55	1.97	5.52667	2.67333
rna-XM_027272586.1	gene-LOC104937696	LOC104937696	NAD-dependent protein deacetylase sirtuin-3, transcript variant X2	0.004	0.00281702	down	0.65	1.12	0.35	0	0	0	0.706667	0
rna-XM_019277878.2	gene-aldoc	aldoc	aldolase, fructose-bisphosphate C, transcript variant X1	0.016	0.0028807	down	0.54	0.15	0.42	0	0	0	0.37	0
rna-XM_027287445.1	gene-vps13c	vps13c	vacuolar protein sorting 13 homolog C, transcript variant X4	0.004	0.00289643	down	0.12	0.25	0.09	0	0	0	0.153333	0
rna-XM_027279864.1	gene-LOC104933148	LOC104933148	NEDD8-activating enzyme E1 catalytic subunit, transcript variant X4	0.005	0.00299405	down	0.62	0.78	1.06	0	0	0	0.82	0
rna-XM_027283416.1	gene-LOC113746675	LOC113746675	zinc finger protein 345-like, transcript variant X5	0.004	0.00306902	down	1.13	0.29	0.59	0	0	0	0.67	0
rna-XM_019257447.2	gene-LOC104926406	LOC104926406	nucleolar and coiled-body phosphoprotein 1, transcript variant X1	0.003	0.00309674	down	0.79	0.18	0.76	0	0	0	0.576667	0
rna-XM_019272518.2	gene-LOC104938526	LOC104938526	acetyl-coenzyme A synthetase, cytoplasmic, transcript variant X2	0.637	0.00315013	down	6.36	4.62	5.54	3.82	3.6	3.31	5.50667	3.57667
rna-XM_010738966.3	gene-LOC104925362	LOC104925362	multidrug resistance-associated protein 5	0.647	0.00315735	down	5.96	7.74	7.23	4.91	4.36	4.62	6.97667	4.63
rna-XM_010741905.3	gene-cpvl	cpvl	carboxypeptidase, vitellogenic like, transcript variant X1	0.519	0.00320751	down	56.18	85.47	89.65	39.24	46.52	37.39	77.1	41.05
rna-NM_001303366.1	gene-pept1	pept1	solute carrier family 15 member 1	0.005	0.00324497	down	0.75	0.32	0.59	0	0	0	0.553333	0
rna-XM_010757234.3	gene-LOC104940592	LOC104940592	very long-chain acyl-CoA synthetase	0.659	0.00330235	down	6.75	7.21	6.73	4.1	4.74	5.13	6.89667	4.65667
rna-XM_010736112.3	gene-LOC104923114	LOC104923114	protein CBFA2T1, transcript variant X4	0.005	0.00331398	down	0.25	0.24	0.33	0	0	0	0.273333	0
rna-XM_027291666.1	gene-poglut1	poglut1	protein O-glucosyltransferase 1, transcript variant X1	0.006	0.00344433	down	0.5	0.58	0.49	0	0	0	0.523333	0
rna-XM_010750496.3	gene-acp7	acp7	acid phosphatase 7, tartrate resistant (putative), transcript variant X1	0.607	0.00349989	down	13.35	16.96	13.74	10.25	8.37	8.74	14.6833	9.12
rna-XM_010732397.3	gene-alas2	alas2	5'-aminolevulinate synthase 2, transcript variant X2	0.349	0.00394831	down	32.4	76.2	41.7	20.51	18.79	14.62	50.1	17.9733
rna-XM_027285132.1	gene-LOC104927738	LOC104927738	chromobox protein homolog 1	0.465	0.0040803	down	9.9	13.65	13.98	7.09	4.05	6.77	12.51	5.97
rna-XM_010737356.3	gene-ccnl1	ccnl1	cyclin L1, transcript variant X2	0.454	0.00414103	down	6.67	8.18	10.21	3.84	2.81	5.01	8.35333	3.88667
rna-XM_027285275.1	gene-nfatc2ip	nfatc2ip	nuclear factor of activated T cells 2 interacting protein, transcript variant X2	0.004	0.00416335	down	3.03	0.72	1.66	0	0	0	1.80333	0
rna-XM_010730460.3	gene-LOC104918648	LOC104918648	protein LYRIC, transcript variant X1	0.617	0.00431233	down	10.64	12.55	13.79	9.19	7.22	6.96	12.3267	7.79
rna-XM_027277349.1	gene-mcph1	mcph1	microcephalin 1, transcript variant X4	0.006	0.00431713	down	0.69	0.36	0.27	0	0	0	0.44	0
rna-XM_027288412.1	gene-tpx2	tpx2	TPX2, microtubule nucleation factor, transcript variant X2	0.183	0.00437159	down	1.81	1.62	1.34	0.2	0.47	0.21	1.59	0.293333
rna-XM_019259254.2	gene-huwe1	huwe1	HECT, UBA and WWE domain containing 1, E3 ubiquitin protein ligase, transcript variant X7	0.386	0.00439981	down	1.21	1.32	1.65	0.32	0.62	0.72	1.39333	0.553333
rna-XM_027275001.1	gene-actn1	actn1	actinin alpha 1, transcript variant X2	0.392	0.00450227	down	10.33	7.76	9.95	2.13	5.18	3.93	9.34667	3.74667
rna-XM_027273968.1	gene-golga3	golga3	golgin A3, transcript variant X2	0.006	0.00459042	down	0.25	0.11	0.21	0	0	0	0.19	0
rna-XM_027290005.1	gene-aes	aes	amino-terminal enhancer of split, transcript variant X4	0.006	0.00493742	down	0.18	0.15	0.32	0	0	0	0.216667	0
rna-XM_019270512.2	gene-LOC104930106	LOC104930106	nuclear factor of activated T-cells 5-like, transcript variant X3	0.651	0.00507214	down	2.29	1.82	1.79	1.21	1.31	1.41	1.96667	1.31
rna-XM_019263504.2	gene-itgb4	itgb4	integrin subunit beta 4, transcript variant X4	0.007	0.00512754	down	0.16	0.09	0.19	0	0	0	0.146667	0
rna-XM_027276294.1	gene-LOC104931896	LOC104931896	globoside alpha-1,3-N-acetylgalactosaminyltransferase 1, transcript variant X2	0.33	0.00525003	down	3.47	2.45	3.13	0.68	1.06	1.3	3.01667	1.01333
rna-XM_027281557.1	gene-LOC104923019	LOC104923019	LIM domain only protein 7, transcript variant X2	0.006	0.00549512	down	0.39	0.23	0.14	0	0	0	0.253333	0
rna-XM_019266118.2	gene-scrn2	scrn2	secernin 2, transcript variant X4	0.008	0.00583925	down	0.45	0.39	0.62	0	0	0	0.486667	0
rna-XM_019266762.2	gene-LOC104931862	LOC104931862	acyl-coenzyme A thioesterase 11, transcript variant X3	0.008	0.00592714	down	0.3	0.46	0.5	0	0	0	0.42	0
rna-XM_027280813.1	gene-LOC104936114	LOC104936114	calcineurin B homologous protein 2	0.663	0.00593578	down	36.57	41.44	32.04	22.23	23.86	28.46	36.6833	24.85
rna-XM_027276177.1	gene-zbtb1	zbtb1	zinc finger and BTB domain containing 1, transcript variant X1	0.528	0.00599569	down	7.78	6.13	8.14	2.7	4.52	4.68	7.35	3.96667
rna-XR_003462470.1	gene-LOC104937145	LOC104937145	uncharacterized LOC104937145, transcript variant X3	0.008	0.00626049	down	0.69	0.98	0.61	0	0	0	0.76	0
rna-XM_019272683.2	gene-LOC104925416	LOC104925416	calcium-independent phospholipase A2-gamma, transcript variant X2	0.008	0.00629829	down	0.23	0.22	0.17	0	0	0	0.206667	0
rna-XM_027283780.1	gene-LOC104926533	LOC104926533	lysozyme g	0.564	0.00634527	down	99.15	132.5	118.42	84.83	52.41	64.7	116.69	67.3133
rna-XM_027277072.1	gene-LOC104928143	LOC104928143	ankyrin repeat and SOCS box protein 3, transcript variant X2	0.004	0.00642762	down	2.21	0.24	0.7	0	0	0	1.05	0
rna-XM_027272776.1	gene-LOC104920478	LOC104920478	oxysterol-binding protein-related protein 5, transcript variant X2	0.005	0.00655006	down	0.35	0.08	0.5	0	0	0	0.31	0
rna-XM_019258432.2	gene-LOC109138412	LOC109138412	uncharacterized LOC109138412, transcript variant X3	0.009	0.00664126	down	0.23	0.23	0.18	0	0	0	0.213333	0
rna-XM_027289166.1	gene-LOC104918928	LOC104918928	zinc finger CCCH domain-containing protein 7B, transcript variant X2	0.001	0.00668765	down	1.82	0.6	0	0	0	0	0.806667	0
rna-XM_019270292.2	gene-LOC104931652	LOC104931652	filamin A-interacting protein 1-like, transcript variant X4	0.008	0.00679889	down	0.17	0.27	0.13	0	0	0	0.19	0
rna-XM_027287123.1	gene-cndp2	cndp2	carnosine dipeptidase 2, transcript variant X3	0.499	0.0068575	down	32.73	50.62	52.33	16.85	27.62	25.04	45.2267	23.17
rna-XM_019257548.2	gene-LOC104926156	LOC104926156	phosphatidate phosphatase LPIN2, transcript variant X7	0.002	0.00698279	down	0.83	0	1.36	0	0	0	0.73	0
rna-XR_003463233.1	gene-LOC113746932	LOC113746932	uncharacterized LOC113746932	0.623	0.00715016	down	9.62	10.97	10.08	5.67	6.97	6.9	10.2233	6.51333
rna-XM_027283911.1	gene-LOC104926775	LOC104926775	beta/gamma crystallin domain-containing protein 1, transcript variant X2	0.008	0.00720676	down	0.2	0.07	0.1	0	0	0	0.123333	0
rna-XM_027285578.1	gene-LOC104932060	LOC104932060	ran GTPase-activating protein 1, transcript variant X3	0.009	0.00725979	down	0.35	0.35	0.35	0	0	0	0.35	0
rna-XM_019261560.2	gene-LOC104923019	LOC104923019	LIM domain only protein 7, transcript variant X5	0.009	0.00731695	down	0.15	0.21	0.17	0	0	0	0.176667	0
rna-XM_019262782.2	gene-eps15	eps15	epidermal growth factor receptor pathway substrate 15, transcript variant X4	0.019	0.00732092	down	0.56	0.59	1.7	0.05	0	0	0.95	0.0166667
rna-XM_019275856.2	gene-LOC104930056	LOC104930056	WASH complex subunit 2-like, transcript variant X1	0.525	0.00743564	down	13.34	14.46	10.85	5.96	5.24	9.61	12.8833	6.93667
rna-XM_019258482.2	gene-LOC104920614	LOC104920614	CXXC-type zinc finger protein 5, transcript variant X2	0.008	0.00744627	down	0.9	0.32	0.4	0	0	0	0.54	0
rna-XM_019262959.2	gene-LOC104930965	LOC104930965	bromodomain and PHD finger-containing protein 3, transcript variant X1	0.013	0.00757197	down	0.12	1.53	0.59	0	0.03	0	0.746667	0.01
rna-XM_010745705.3	gene-rnf19b	rnf19b	ring finger protein 19B	0.598	0.00765169	down	7.39	8.55	9.38	4.35	6.6	4.57	8.44	5.17333
rna-XM_019261186.2	gene-piga	piga	phosphatidylinositol glycan anchor biosynthesis class A, transcript variant X3	0.007	0.00769102	down	1.02	0.26	0.43	0	0	0	0.57	0
rna-XM_027283945.1	gene-LOC104940140	LOC104940140	leukocyte elastase inhibitor, transcript variant X5	0.009	0.00770582	down	0.44	0.93	0.66	0	0	0	0.676667	0
rna-XM_027279263.1	gene-LOC104936390	LOC104936390	myosin regulatory light polypeptide 9	0.537	0.00804462	down	7.54	8.56	7.85	4.27	5.35	3.51	7.98333	4.37667
rna-XM_010729853.3	gene-LOC113743982	LOC113743982	uncharacterized LOC113743982, transcript variant X2	0.009	0.00827352	down	0.33	0.4	0.64	0	0	0	0.456667	0
rna-XM_027284915.1	gene-cenpt	cenpt	centromere protein T, transcript variant X3	0.01	0.00830367	down	0.21	0.32	0.2	0	0	0	0.243333	0
rna-XM_019261616.2	gene-oxsm	oxsm	3-oxoacyl-ACP synthase, mitochondrial, transcript variant X2	0.009	0.00851151	down	0.31	0.88	0.59	0	0	0	0.593333	0
rna-XM_019273955.2	gene-LOC109141895	LOC109141895	next to BRCA1 gene 1 protein, transcript variant X3	0.458	0.00886051	down	1.57	1.07	1.34	0.84	0.51	0.51	1.32667	0.62
rna-XR_003463378.1	gene-LOC104935895	LOC104935895	myc-associated zinc finger protein, transcript variant X1	0.643	0.00893494	down	4.04	3.11	3.95	2.59	2.3	2.4	3.7	2.43
rna-XM_019259256.2	gene-huwe1	huwe1	HECT, UBA and WWE domain containing 1, E3 ubiquitin protein ligase, transcript variant X9	0.582	0.00894366	down	1.74	1.08	1.67	0.81	0.8	1.06	1.49667	0.89
rna-XM_019271769.2	gene-smad2	smad2	SMAD family member 2, transcript variant X2	0.432	0.00896429	down	1.82	1.13	1.59	0.45	0.85	0.7	1.51333	0.666667
rna-XM_010738973.3	gene-btk	btk	Bruton tyrosine kinase, transcript variant X2	0.637	0.00900662	down	8.39	9.41	8.77	5.76	6.86	4.7	8.85667	5.77333
rna-XM_027274690.1	gene-ralgapa2	ralgapa2	Ral GTPase activating protein catalytic alpha subunit 2, transcript variant X3	0.01	0.00901331	down	0.19	0.09	0.08	0	0	0	0.12	0
rna-XM_027281282.1	gene-ankrd11	ankrd11	ankyrin repeat domain 11, transcript variant X3	0.003	0.00903845	down	0	0.67	0.68	0	0	0	0.45	0
rna-XM_027282357.1	gene-shld2	shld2	shieldin complex subunit 2, transcript variant X1	0.01	0.00904505	down	0.24	0.16	0.34	0	0	0	0.246667	0
rna-XM_027272763.1	gene-pidd1	pidd1	p53-induced death domain protein 1, transcript variant X1	0.592	0.00911801	down	2.3	1.65	2.06	1.14	1.27	1.22	2.00333	1.21
rna-XM_019266464.2	gene-LOC104926780	LOC104926780	apolipoprotein B-100	0.011	0.0094444	down	0.06	0.09	0.05	0	0	0	0.0666667	0
rna-XM_010739133.3	gene-LOC104925501	LOC104925501	serum paraoxonase/arylesterase 2	0.559	0.00944917	down	7.18	5.22	5.83	3.56	3.34	3.47	6.07667	3.45667
rna-XM_010741687.3	gene-cndp2	cndp2	carnosine dipeptidase 2, transcript variant X2	0.549	0.00951446	down	98.96	184.51	145.28	86.89	80.49	74.43	142.917	80.6033
rna-XM_010729993.3	gene-LOC104918290	LOC104918290	rho GTPase-activating protein 21, transcript variant X3	0.275	0.00958881	down	0.51	1.35	1.56	0.29	0.43	0.25	1.14	0.323333
rna-NM_001303343.1	gene-cxcl13	cxcl13	C-X-C motif chemokine ligand 13	0.631	0.00960265	down	2027.81	1437.93	1311.53	836.3	1077.67	1135.75	1592.42	1016.57
rna-XM_027275397.1	gene-LOC104933857	LOC104933857	protein DEK, transcript variant X3	0.01	0.00964385	down	0.34	0.31	0.64	0	0	0	0.43	0
rna-XM_019256485.2	gene-zbtb46	zbtb46	zinc finger and BTB domain containing 46, transcript variant X2	0.001	0.00983151	down	2.36	0.04	1.17	0	0	0	1.19	0
rna-XM_027280116.1	gene-LOC104928524	LOC104928524	NACHT and WD repeat domain-containing protein 2, transcript variant X4	0.004	0.0103838	down	0.37	0	0.54	0	0	0	0.303333	0
rna-XM_019262254.2	gene-lama3	lama3	laminin subunit alpha 3, transcript variant X1	0.03	0.0105351	down	0.05	0.03	0.03	0	0	0	0.0366667	0
rna-XM_027277736.1	gene-macrod2	macrod2	MACRO domain containing 2, transcript variant X1	0.571	0.0108349	down	11.87	14.81	15.61	6.05	10.61	8.11	14.0967	8.25667
rna-XM_027286953.1	gene-flad1	flad1	flavin adenine dinucleotide synthetase 1, transcript variant X2	0.013	0.0109015	down	0.23	0.3	0.26	0	0	0	0.263333	0
rna-XM_019266565.2	gene-LOC104933548	LOC104933548	adenylate cyclase type 4	0.618	0.0109058	down	3.99	5.33	4.99	2.83	2.53	3.73	4.77	3.03
rna-XM_027287760.1	gene-LOC104932937	LOC104932937	interferon-induced very large GTPase 1, transcript variant X1	0.618	0.0111352	down	165.88	252.23	231.82	152.55	142.74	117.26	216.643	137.517
rna-XM_027291015.1	gene-slc35a5	slc35a5	solute carrier family 35 member A5, transcript variant X4	0.487	0.0112472	down	4.12	4.34	2.66	2.01	1.74	1.78	3.70667	1.84333
rna-XM_027286789.1	gene-LOC104940075	LOC104940075	NLR family CARD domain-containing protein 3, transcript variant X3	0.582	0.0114951	down	4.93	8.26	6.74	4.47	3.87	3.58	6.64333	3.97333
rna-XM_019261545.2	gene-LOC104923256	LOC104923256	histone acetyltransferase KAT7, transcript variant X3	0.014	0.0116131	down	0.2	0.18	0.22	0	0	0	0.2	0
rna-XM_027289937.1	gene-szt2	szt2	SZT2, KICSTOR complex subunit, transcript variant X7	0.004	0.0116605	down	0	0.26	0.42	0	0	0	0.226667	0
rna-XM_027286212.1	gene-LOC104924415	LOC104924415	major histocompatibility complex class I-related gene protein	0.613	0.0117034	down	38.2	46.29	49.92	31.32	32.01	20.91	44.8033	28.08
rna-XM_019274425.2	gene-mre11	mre11	MRE11 homolog, double strand break repair nuclease, transcript variant X1	0.569	0.0117367	down	5.55	4.95	7.35	3.39	2.84	4.13	5.95	3.45333
rna-XM_027280121.1	gene-LOC104934877	LOC104934877	alpha-1,3-mannosyl-glycoprotein 4-beta-N-acetylglucosaminyltransferase B, transcript variant X2	0.006	0.0117431	down	0.6	0.13	1.62	0	0	0	0.783333	0
rna-XM_019263476.2	gene-fancd2	fancd2	FA complementation group D2, transcript variant X4	0.643	0.011804	down	4.77	3.48	3.27	2.37	2.84	2.34	3.84	2.51667
rna-XM_027287732.1	gene-LOC104925199	LOC104925199	tudor domain-containing protein 7B, transcript variant X2	0.014	0.0118681	down	0.12	0.08	0.07	0	0	0	0.09	0
rna-XM_019270967.2	gene-LOC104919507	LOC104919507	bromodomain and PHD finger-containing protein 3, transcript variant X3	0.283	0.011992	down	1	0.72	0.69	0.35	0.19	0.14	0.803333	0.226667
rna-XM_027278213.1	gene-slc15a4	slc15a4	solute carrier family 15 member 4, transcript variant X2	0.499	0.0120229	down	3.78	5.13	6.5	1.84	3.26	2.79	5.13667	2.63
rna-NM_001303359.1	gene-LOC104918687	LOC104918687	hemoglobin subunit alpha-like	0.41	0.0121444	down	2597.32	3304.88	2111.5	1570.42	580.48	1167.83	2671.23	1106.24
rna-XM_019271596.2	gene-haus3	haus3	HAUS augmin like complex subunit 3	0.012	0.0122679	down	0.18	0.46	0.2	0	0	0	0.28	0
rna-XR_003461666.1	gene-LOC104924642	LOC104924642	interferon alpha-inducible protein 27-like protein 2A, transcript variant X3	0.444	0.0123382	down	4.86	4.8	2.45	1.8	2.11	1.58	4.03667	1.83
rna-XM_027281809.1	gene-LOC104936323	LOC104936323	E3 ubiquitin-protein ligase MARCH5, transcript variant X3	0.286	0.0124067	down	1.54	3.47	3.34	0.66	1.16	0.63	2.78333	0.816667
rna-XM_027277666.1	gene-mpdz	mpdz	multiple PDZ domain crumbs cell polarity complex component, transcript variant X9	0.049	0.0124886	down	0.22	0.17	0.18	0.02	0.01	0	0.19	0.01
rna-XM_027291262.1	gene-abi3bp	abi3bp	ABI family member 3 binding protein, transcript variant X6	0.01	0.0127106	down	0.07	0.27	0.31	0	0	0	0.216667	0
rna-XM_019272014.2	gene-gla	gla	galactosidase alpha	0.589	0.0128599	down	9.82	14.31	15.28	7.8	6.97	9	13.1367	7.92333
rna-XR_003463801.1	gene-fmnl3	fmnl3	formin like 3, transcript variant X3	0.013	0.01288	down	0.12	0.18	0.07	0	0	0	0.123333	0
rna-XM_010739420.3	gene-ccnf	ccnf	cyclin F, transcript variant X1	0.647	0.0129103	down	3.25	2.78	2.71	2.2	1.68	1.9	2.91333	1.92667
rna-XM_019275112.2	gene-LOC104930217	LOC104930217	RUN domain-containing protein 3A, transcript variant X1	0.014	0.0129892	down	0.23	0.54	0.36	0	0	0	0.376667	0
rna-XM_027285012.1	gene-pde4dip	pde4dip	phosphodiesterase 4D interacting protein, transcript variant X6	0.013	0.0129966	down	0.07	0.07	0.02	0	0	0	0.0533333	0
rna-XM_019263112.2	gene-LOC109139448	LOC109139448	zinc finger BED domain-containing protein 1	0.028	0.0131966	down	0.45	0.24	0.66	0	0	0.03	0.45	0.01
rna-XM_019265615.2	gene-osbpl8	osbpl8	oxysterol binding protein like 8, transcript variant X7	0.59	0.0131972	down	4.15	5.61	3.76	3.14	2.09	2.96	4.50667	2.73
rna-XM_027273904.1	gene-sytl2	sytl2	synaptotagmin like 2, transcript variant X2	0.016	0.0134254	down	0.12	0.09	0.08	0	0	0	0.0966667	0
rna-XM_010753309.3	gene-snapc2	snapc2	small nuclear RNA activating complex polypeptide 2, transcript variant X3	0.012	0.0134586	down	0.24	0.23	0.66	0	0	0	0.376667	0
rna-XM_010735282.3	gene-pcdh7	pcdh7	protocadherin 7, transcript variant X2	0.006	0.0135529	down	0.26	0	0.39	0	0	0	0.216667	0
rna-XM_027272228.1	gene-LOC104917715	LOC104917715	mucolipin-3, transcript variant X2	0.01	0.0136377	down	0.64	0.11	0.26	0	0	0	0.336667	0
rna-XM_019277088.2	gene-kif15	kif15	kinesin family member 15, transcript variant X1	0.368	0.0136731	down	1.02	0.74	1.34	0.29	0.47	0.4	1.03333	0.386667
rna-XM_010754052.3	gene-LOC104937657	LOC104937657	histone deacetylase 7, transcript variant X2	0.624	0.0136912	down	2.7	2.24	1.96	1.54	1.63	1.22	2.3	1.46333
rna-XM_019252859.2	gene-LOC104918693	LOC104918693	hemoglobin subunit beta	0.477	0.013957	down	7941.09	6817.15	5431.16	4220.45	1806.66	3688.45	6729.8	3238.52
rna-XM_027285415.1	gene-LOC109142533	LOC109142533	leucine-rich repeat flightless-interacting protein 2, transcript variant X9	0.006	0.0141111	down	0.56	0.17	0	0	0	0	0.243333	0
rna-XM_010735109.3	gene-LOC104922310	LOC104922310	NAD(P)(+)--arginine ADP-ribosyltransferase 1	0.558	0.0141609	down	11.1	11.22	13.36	8.87	4.91	6.53	11.8933	6.77
rna-XM_027274386.1	gene-LOC113744505	LOC113744505	copine-3-like	0.23	0.0142573	down	0.76	1.94	3.43	0.37	0.67	0.41	2.04333	0.483333
rna-XM_027279638.1	gene-vps13d	vps13d	vacuolar protein sorting 13 homolog D, transcript variant X4	0.566	0.0143115	down	0.9	1.58	1.01	0.66	0.69	0.68	1.16333	0.676667
rna-XM_019270357.2	gene-puf60	puf60	poly(U) binding splicing factor 60, transcript variant X1	0.004	0.0143368	down	0.4	0	3.78	0	0	0	1.39333	0
rna-XR_003462463.1	gene-LOC113745863	LOC113745863	uncharacterized LOC113745863	0.362	0.0143373	down	6.85	7.66	7.12	2.94	1.42	3.6	7.21	2.65333
rna-XM_019260418.2	gene-clasp1	clasp1	cytoplasmic linker associated protein 1, transcript variant X18	0.015	0.0143554	down	0.05	0.04	0.09	0	0	0	0.06	0
rna-XM_019277744.2	gene-LOC104936234	LOC104936234	E3 ubiquitin-protein ligase rnf213-beta, transcript variant X1	0.548	0.0144004	down	21.69	25.21	19.92	11.54	8.47	17.6	22.2733	12.5367
rna-XM_027285438.1	gene-LOC104918683	LOC104918683	hemoglobin subunit alpha-1, transcript variant X1	0.517	0.0144585	down	15115	21117.6	16564	13142.7	6891.18	7573.3	17598.9	9202.4
rna-XM_019273105.2	gene-LOC104926881	LOC104926881	ataxin-2-like protein, transcript variant X2	0.53	0.0145329	down	2.97	2.61	2.31	1.79	1.01	1.46	2.63	1.42
rna-XM_027285785.1	gene-LOC104940306	LOC104940306	rho GTPase-activating protein 44-like, transcript variant X3	0.029	0.014903	down	0.12	0.35	0.07	0	0	0.01	0.18	0.00333333
rna-XM_019258062.2	gene-LOC104921896	LOC104921896	sorbin and SH3 domain-containing protein 1, transcript variant X7	0.014	0.0149997	down	0.05	0.11	0.03	0	0	0	0.0633333	0
rna-XM_027290262.1	gene-ptprc	ptprc	protein tyrosine phosphatase, receptor type C, transcript variant X3	0.33	0.0150949	down	56.21	47.2	23.05	7.76	11.26	23.73	42.1533	14.25
rna-XM_027281690.1	gene-LOC104934315	LOC104934315	zinc finger and BTB domain-containing protein 14, transcript variant X3	0.467	0.0152241	down	2.08	3.03	2.77	1.34	1.32	1.11	2.62667	1.25667
rna-XM_027285004.1	gene-xylt2	xylt2	xylosyltransferase 2, transcript variant X3	0.208	0.0152495	down	0.89	1.13	1.44	0.44	0.21	0.07	1.15333	0.24
rna-XM_019278379.2	gene-LOC104924493	LOC104924493	Polyadenylate-binding protein, cytoplasmic and nuclear, transcript variant X1	0.017	0.015276	down	0.25	0.29	0.46	0	0	0	0.333333	0
rna-XM_019266527.2	gene-asah1	asah1	N-acylsphingosine amidohydrolase 1	0.583	0.0154444	down	101.49	188.39	154.44	78.37	91.1	96.71	148.107	88.7267
rna-XM_027284456.1	gene-LOC104923892	LOC104923892	hyaluronan mediated motility receptor, transcript variant X2	0.284	0.0154643	down	2.17	2.6	2.75	0.48	1.34	0.36	2.50667	0.726667
rna-XM_019259922.2	gene-LOC104933116	LOC104933116	transducin-like enhancer protein 1, transcript variant X3	0.008	0.0155131	down	0.36	0	0.38	0	0	0	0.246667	0
rna-XM_027287076.1	gene-LOC104923770	LOC104923770	furin-like protease kpc-1, transcript variant X3	0.016	0.0155218	down	0.25	0.23	0.1	0	0	0	0.193333	0
rna-XM_019256454.2	gene-LOC104931676	LOC104931676	potassium voltage-gated channel subfamily D member 3, transcript variant X2	0.013	0.0155579	down	0.04	0.11	0.17	0	0	0	0.106667	0
rna-XM_019252854.2	gene-LOC109136734	LOC109136734	hemoglobin subunit beta	0.517	0.0158465	down	2343.89	3176.98	2063.78	1835.7	922.08	1205.62	2528.22	1321.13
rna-XM_027288972.1	gene-LOC104932903	LOC104932903	probable E3 ubiquitin-protein ligase DTX3, transcript variant X2	0.013	0.0158647	down	0.12	0.51	0.24	0	0	0	0.29	0
rna-XM_010737839.3	gene-cixh18orf25	cixh18orf25	chromosome IX C18orf25 homolog, transcript variant X4	0.364	0.0160402	down	2.09	4.53	1.9	1.37	1.1	0.72	2.84	1.06333
rna-XM_027291951.1	gene-kmt2e	kmt2e	lysine methyltransferase 2E, transcript variant X9	0.006	0.0162328	down	1.22	0	0.44	0.01	0	0	0.553333	0.00333333
rna-XM_010740462.3	gene-LOC104926581	LOC104926581	GRAM domain-containing protein 4, transcript variant X3	0.034	0.0162431	down	0.46	0.58	0.83	0	0	0.06	0.623333	0.02
rna-XM_019268475.2	gene-rmnd5b	rmnd5b	required for meiotic nuclear division 5 homolog B, transcript variant X1	0.572	0.0162805	down	16.95	9.7	17.38	10.07	6.94	8.62	14.6767	8.54333
rna-XM_027277152.1	gene-ankfn1	ankfn1	ankyrin repeat and fibronectin type III domain containing 1, transcript variant X1	0.038	0.0163363	down	0.23	0.06	0.08	0	0	0.01	0.123333	0.00333333
rna-XM_027285443.1	gene-LOC113744048	LOC113744048	hemoglobin subunit beta-like	0.485	0.0163808	down	2277.28	3152.57	2057.88	1495.1	701.69	1447.15	2495.91	1214.65
rna-XM_019266869.2	gene-LOC104930574	LOC104930574	contactin-3, transcript variant X3	0.011	0.0164051	down	1.38	0.29	0.29	0	0	0	0.653333	0
rna-XR_003463566.1	gene-LOC113747325	LOC113747325	uncharacterized LOC113747325	0.02	0.0167677	down	0.3	0.28	0.26	0	0	0	0.28	0
rna-XM_027277302.1	gene-LOC104930683	LOC104930683	6-phosphofructo-2-kinase/fructose-2,6-bisphosphatase 2, transcript variant X4	0.012	0.0167732	down	0.59	0.1	0.19	0	0	0	0.293333	0
rna-XM_019266981.2	gene-phex	phex	phosphate regulating endopeptidase homolog X-linked, transcript variant X1	0.501	0.0168864	down	2.72	2.59	2.21	1.25	1.7	0.89	2.50667	1.28
rna-XM_019267588.2	gene-LOC109140542	LOC109140542	heme transporter hrg1-A-like	0.573	0.0170947	down	70.88	117.69	133.52	57.19	58.44	73.83	107.363	63.1533
rna-XM_010750329.3	gene-LOC104934621	LOC104934621	mitoferrin-1	0.563	0.0172592	down	12.29	15.62	10.83	9.43	5.01	7.91	12.9133	7.45
rna-XM_027281724.1	gene-ctsd	ctsd	cathepsin D	0.559	0.0173346	down	563.36	1023.17	1049.51	424.84	564.76	522.84	878.68	504.147
rna-XM_010730796.3	gene-LOC104918911	LOC104918911	hemoglobin subunit beta-2	0.519	0.0176799	down	3965.06	5598.71	4444.47	3568.05	1780.57	2003.47	4669.41	2450.7
rna-XM_027272401.1	gene-LOC113744085	LOC113744085	protein FAM169B-like, transcript variant X2	0.02	0.0179035	down	0.28	0.22	0.13	0	0	0	0.21	0
rna-XM_010730520.3	gene-LOC104918692	LOC104918692	hemoglobin subunit alpha-A	0.519	0.0180126	down	8696.91	8570.99	6216.91	4996.39	2398.49	4937.63	7828.27	4110.84
rna-XM_027291913.1	gene-rad51ap1	rad51ap1	RAD51 associated protein 1, transcript variant X3	0.02	0.0180163	down	0.46	0.2	0.26	0	0	0	0.306667	0
rna-XM_027276053.1	gene-gpr180	gpr180	G protein-coupled receptor 180, transcript variant X2	0.034	0.0181602	down	0.06	0.37	0.38	0.01	0	0	0.27	0.00333333
rna-XM_027274505.1	gene-LOC104940408	LOC104940408	cathepsin L1, transcript variant X2	0.66	0.0182501	down	127.49	171.69	147.9	92.21	124.72	84.7	149.027	100.543
rna-XM_027272619.1	gene-LOC104933373	LOC104933373	voltage-dependent calcium channel subunit alpha-2/delta-4, transcript variant X2	0.021	0.0182943	down	0.09	0.05	0.06	0	0	0	0.0666667	0
rna-XM_019263850.2	gene-cbr1	cbr1	carbonyl reductase 1, transcript variant X3	0.324	0.0185543	down	8.29	25.98	8.01	5.06	3.71	5.38	14.0933	4.71667
rna-XM_010744681.3	gene-LOC104930016	LOC104930016	ABC transporter G family member 23, transcript variant X2	0.45	0.0189576	down	1.65	1.56	0.78	0.51	0.75	0.58	1.33	0.613333
rna-XM_027277585.1	gene-tnip1	tnip1	TNFAIP3 interacting protein 1, transcript variant X7	0.18	0.0191132	down	6.77	2.89	0.76	0.32	0.81	0.77	3.47333	0.633333
rna-XM_027272689.1	gene-LOC109140079	LOC109140079	toll-like receptor 10, transcript variant X5	0.013	0.0191716	down	0.2	0.27	0.04	0	0	0	0.17	0
rna-XM_010752837.3	gene-ift52	ift52	intraflagellar transport 52, transcript variant X1	0.398	0.0192293	down	4.76	5	4.85	2.64	2.32	0.96	4.87	1.97333
rna-XM_010734391.3	gene-cpo	cpo	carboxypeptidase O, transcript variant X1	0.019	0.0194054	down	0.23	0.11	0.36	0	0	0	0.233333	0
rna-XM_019259047.2	gene-LOC104920950	LOC104920950	CMP-N-acetylneuraminate-beta-1,4-galactoside alpha-2,3-sialyltransferase, transcript variant X5	0.485	0.0194828	down	4.49	2.86	2.57	2.26	1.57	1.07	3.30667	1.63333
rna-XM_027290332.1	gene-ncl	ncl	nucleolin, transcript variant X2	0.006	0.0195108	down	67.01	16.93	0	0	0.53	0	27.98	0.176667
rna-XM_019269794.2	gene-sema6a	sema6a	semaphorin 6A, transcript variant X5	0.018	0.0196347	down	0.11	0.13	0.04	0	0	0	0.0933333	0
rna-XM_019273716.2	gene-LOC104918110	LOC104918110	serine/threonine-protein phosphatase 6 regulatory subunit 2-like, transcript variant X4	0.03	0.0197505	down	0.21	0.12	0.65	0.03	0	0	0.326667	0.01
rna-XM_010746450.3	gene-LOC104931439	LOC104931439	receptor-type tyrosine-protein phosphatase F, transcript variant X12	0.445	0.020403	down	0.74	0.89	0.91	0.56	0.33	0.26	0.846667	0.383333
rna-XM_010746323.3	gene-tspo	tspo	translocator protein, transcript variant X1	0.642	0.0205311	down	53.31	50.9	34.22	24.73	29.36	36.6	46.1433	30.23
rna-XM_019265462.2	gene-fech	fech	ferrochelatase	0.597	0.0205874	down	7.85	9.91	6.9	6.29	3.53	5.28	8.22	5.03333
rna-XM_019272210.2	gene-LOC104917754	LOC104917754	FYVE and coiled-coil domain-containing protein 1, transcript variant X2	0.488	0.0207058	down	4.2	3.73	3.94	1.03	2.03	2.88	3.95667	1.98
rna-XM_019256477.2	gene-LOC104927484	LOC104927484	DNA topoisomerase 1-like, transcript variant X2	0.607	0.0208942	down	2.36	3	2.32	1.72	1.62	1.43	2.56	1.59
rna-XM_027286087.1	gene-LOC104928897	LOC104928897	thrombospondin type-1 domain-containing protein 7A, transcript variant X1	0.009	0.0209803	down	0	0.61	1.21	0	0.01	0	0.606667	0.00333333
rna-XM_019264713.2	gene-isg20l2	isg20l2	interferon stimulated exonuclease gene 20 like 2, transcript variant X2	0.364	0.0210717	down	6.16	11.33	4.68	3.97	2.08	2.2	7.39	2.75
rna-XM_010734670.3	gene-naaa	naaa	N-acylethanolamine acid amidase, transcript variant X2	0.529	0.021208	down	6.05	9.46	9.61	3.37	5.3	4.95	8.37333	4.54
rna-XR_003463837.1	gene-LOC104928364	LOC104928364	uncharacterized LOC104928364, transcript variant X4	0.223	0.0212655	down	0.3	0.26	0.21	0.06	0.04	0.07	0.256667	0.0566667
rna-XM_019268691.2	gene-r3hdm2	r3hdm2	R3H domain containing 2, transcript variant X4	0.02	0.0214545	down	0.16	0.1	0.04	0	0	0	0.1	0
rna-XM_027274712.1	gene-inf2	inf2	inverted formin, FH2 and WH2 domain containing, transcript variant X2	0.001	0.0216837	down	3.61	0	1.48	0	0	0	1.69667	0
rna-XM_010740312.3	gene-hmbs	hmbs	hydroxymethylbilane synthase, transcript variant X1	0.471	0.0218236	down	10.1	16.98	11.61	9.45	4.23	5	12.8967	6.22667
rna-XM_027287399.1	gene-LOC113747489	LOC113747489	uncharacterized LOC113747489, transcript variant X1	0.556	0.0220214	down	273.79	323.87	477.12	269.09	155.52	183.98	358.26	202.863
rna-XM_019269221.2	gene-nsfl1c	nsfl1c	NSFL1 cofactor	0.465	0.0221027	down	8.13	21.56	20.66	7.82	8.35	7.92	16.7833	8.03
rna-XM_027278189.1	gene-add2	add2	adducin 2, transcript variant X6	0.021	0.0227128	down	0.31	0.07	0.14	0	0	0	0.173333	0
rna-XM_019277750.2	gene-LOC104936234	LOC104936234	E3 ubiquitin-protein ligase rnf213-beta, transcript variant X6	0.407	0.0227804	down	17.57	22.59	24.32	15.61	5.75	5.53	21.4933	8.96333
rna-XM_010730579.3	gene-usp31	usp31	ubiquitin specific peptidase 31, transcript variant X1	0.661	0.0230031	down	1.53	1.67	1.94	1.41	0.93	1.13	1.71333	1.15667
rna-XM_027283941.1	gene-LOC104920006	LOC104920006	neuronal acetylcholine receptor subunit alpha-7, transcript variant X3	0.025	0.0231485	down	0.12	0.07	0.05	0	0	0	0.08	0
rna-XM_010744992.3	gene-LOC104930258	LOC104930258	transcription factor MafG, transcript variant X1	0.639	0.0232255	down	4.09	2.9	4.24	1.94	2.33	3.07	3.74333	2.44667
rna-XM_010739771.3	gene-LOC104926008	LOC104926008	tumor necrosis factor ligand superfamily member 6, transcript variant X1	0.596	0.0234176	down	3.19	3.94	3.46	2.03	1.72	2.73	3.53	2.16
rna-XM_019254551.2	gene-LOC109137114	LOC109137114	histone H2B 1/2	0.029	0.0234611	down	0.49	0.45	0.46	0	0	0	0.466667	0
rna-XM_019258357.2	gene-LOC104928227	LOC104928227	caspase-3-like, transcript variant X1	0.614	0.0235581	down	22.62	29.83	36.23	15.88	23.8	16.07	29.56	18.5833
rna-XM_019265264.2	gene-dock7	dock7	dedicator of cytokinesis 7, transcript variant X13	0.065	0.023617	down	0.15	0.22	0.12	0.02	0.01	0	0.163333	0.01
rna-XM_027275992.1	gene-uspl1	uspl1	ubiquitin specific peptidase like 1, transcript variant X2	0.001	0.02366	down	4.51	0	3.96	0	0	0	2.82333	0
rna-XM_019276422.2	gene-LOC104919081	LOC104919081	tripartite motif-containing protein 66, transcript variant X2	0.504	0.0238288	down	6.11	5.51	11.33	4.61	4.44	2.79	7.65	3.94667
rna-XM_027277908.1	gene-LOC104936293	LOC104936293	lysine-specific demethylase 2B, transcript variant X2	0.001	0.0242257	down	0	4.26	8.52	0	0	0	4.26	0
rna-XR_003462725.1	gene-acsf3	acsf3	acyl-CoA synthetase family member 3, transcript variant X2	0.03	0.0244636	down	0.11	0.09	0.07	0	0	0	0.09	0
rna-XM_019254309.2	gene-LOC104924291	LOC104924291	rho GTPase-activating protein 22, transcript variant X2	0.616	0.0244678	down	11.26	9.94	10.72	6.57	4.5	9.07	10.64	6.71333
rna-XM_019255671.2	gene-LOC104918997	LOC104918997	flavin reductase (NADPH), transcript variant X4	0.013	0.0244765	down	1.09	0.08	1.11	0	0	0	0.76	0
rna-XM_027282542.1	gene-LOC109139141	LOC109139141	CMRF35-like molecule 1	0.028	0.0245012	down	0.12	1.86	1.55	0	0.07	0	1.17667	0.0233333
rna-XM_010752414.3	gene-il7r	il7r	interleukin 7 receptor	0.653	0.0247484	down	12.43	12.35	15.41	7.21	11.75	7.9	13.3967	8.95333
rna-XM_010734644.3	gene-LOC104921954	LOC104921954	Krueppel-like factor 9	0.531	0.0248554	down	4.14	3.5	2.79	2.41	1.37	1.87	3.47667	1.88333
rna-XM_027278696.1	gene-LOC104929538	LOC104929538	serine/threonine-protein phosphatase 2A 56 kDa regulatory subunit epsilon isoform, transcript variant X2	0.249	0.0251126	down	1.6	0.34	0.93	0.25	0.24	0.23	0.956667	0.24
rna-XM_019266828.2	gene-LOC104939945	LOC104939945	peripheral plasma membrane protein CASK, transcript variant X9	0.5	0.0252353	down	1.1	0.91	1.22	0.56	0.63	0.46	1.07667	0.55
rna-XM_019255190.2	gene-slc26a2	slc26a2	solute carrier family 26 member 2	0.543	0.0253464	down	1.64	2.66	3.17	1.47	1.47	1.22	2.49	1.38667
rna-XM_010742261.3	gene-LOC104928051	LOC104928051	apolipoprotein Eb	0.027	0.0253577	down	0.18	0.16	0.39	0	0	0	0.243333	0
rna-XM_027287135.1	gene-LOC104925498	LOC104925498	titin, transcript variant X10	0.609	0.0254878	down	2.31	1.5	1.7	1.43	0.9	1.08	1.83667	1.13667
rna-XM_010736669.3	gene-hic1	hic1	HIC ZBTB transcriptional repressor 1, transcript variant X3	0.365	0.0255528	down	0.5	0.26	0.35	0.14	0.09	0.18	0.37	0.136667
rna-XR_003462406.1	gene-LOC109142416	LOC109142416	uncharacterized LOC109142416, transcript variant X3	0.528	0.0256823	down	10.55	6.89	5.14	3.98	5.16	2.98	7.52667	4.04
rna-XM_010733280.3	gene-LOC104920888	LOC104920888	alkaline phosphatase, transcript variant X1	0.029	0.0258615	down	0.11	0.2	0.1	0	0	0	0.136667	0
rna-XM_010744200.3	gene-LOC104929630	LOC104929630	E3 ubiquitin-protein ligase TRIM21	0.639	0.0258938	down	22.48	28.88	35.5	22.63	19.12	15.03	28.9533	18.9267
rna-XM_027274234.1	gene-sh3kbp1	sh3kbp1	SH3 domain containing kinase binding protein 1, transcript variant X3	0.001	0.0259116	down	1.92	0	4.29	0	0	0	2.07	0
rna-XM_027280244.1	gene-si	si	sucrase-isomaltase, transcript variant X2	0.026	0.0259714	down	0.07	0.02	0.06	0	0	0	0.05	0
rna-XM_010738137.3	gene-LOC104924699	LOC104924699	ATP-dependent 6-phosphofructokinase, platelet type, transcript variant X6	0.02	0.0260027	down	0	0.13	0.3	0	0	0	0.143333	0
rna-XM_027288288.1	gene-LOC104920225	LOC104920225	chymotrypsin-C-like, transcript variant X1	0.027	0.0261852	down	0.61	0.18	0.47	0	0	0	0.42	0
rna-XM_027273218.1	gene-irf1	irf1	interferon regulatory factor 1, transcript variant X1	0.472	0.0261911	down	4.22	3.31	3.2	1.27	2.13	1.75	3.57667	1.71667
rna-XM_027277434.1	gene-aak1	aak1	AP2 associated kinase 1, transcript variant X6	0.006	0.0261996	down	0.58	0.12	0.01	0	0	0	0.236667	0
rna-XM_010731310.3	gene-LOC104919321	LOC104919321	ammonium transporter Rh type A	0.55	0.0263167	down	3.61	3.28	3.16	2.2	1.44	2	3.35	1.88
rna-XM_019264503.2	gene-LOC104921639	LOC104921639	solute carrier family 23 member 2, transcript variant X3	0.605	0.0263313	down	5.23	9.36	5.73	4.12	4.77	3.75	6.77333	4.21333
rna-XM_027278458.1	gene-rmi1	rmi1	RecQ mediated genome instability 1, transcript variant X1	0.001	0.0264912	down	1.66	0	2.92	0	0	0	1.52667	0
rna-XM_027275486.1	gene-abhd12	abhd12	abhydrolase domain containing 12, transcript variant X3	0.002	0.026532	down	3.37	3.36	0	0	0	0	2.24333	0
rna-XM_019274882.2	gene-tlr3	tlr3	toll like receptor 3, transcript variant X5	0.002	0.0266302	down	0	1.71	1.7	0	0	0	1.13667	0
rna-XM_027291193.1	gene-ttf2	ttf2	transcription termination factor 2, transcript variant X2	0.002	0.0266428	down	0	1.29	2.1	0	0	0	1.13	0
rna-XM_027277356.1	gene-LOC104940100	LOC104940100	AP-3 complex subunit mu-1, transcript variant X2	0.54	0.0266635	down	4.08	2.25	3.71	2.09	1.52	1.89	3.34667	1.83333
rna-XM_027282968.1	gene-casp6	casp6	caspase 6, transcript variant X1	0.507	0.026721	down	3.91	5.53	5.91	2.97	1.54	3.48	5.11667	2.66333
rna-XM_019274852.2	gene-LOC104918171	LOC104918171	crystallin J1B-like, transcript variant X1	0.556	0.0267308	down	22.53	36.19	22.11	20.68	12.29	13.05	26.9433	15.34
rna-XM_019262081.2	gene-LOC104923274	LOC104923274	SH3 and multiple ankyrin repeat domains protein 1, transcript variant X2	0.002	0.0267554	down	0.68	0.61	0	0	0	0	0.43	0
rna-XM_010737430.3	gene-trip12	trip12	thyroid hormone receptor interactor 12, transcript variant X3	0.545	0.0268349	down	1.3	1.59	1.83	0.57	0.99	1.08	1.57333	0.88
rna-XM_027290590.1	gene-rock1	rock1	Rho associated coiled-coil containing protein kinase 1, transcript variant X2	0.424	0.0269143	down	1.39	0.81	0.78	0.61	0.35	0.32	0.993333	0.426667
rna-XM_019270786.2	gene-ripor2	ripor2	RHO family interacting cell polarization regulator 2, transcript variant X4	0.001	0.0269353	down	0	2.3	0.82	0	0	0	1.04	0
rna-XM_027272704.1	gene-LOC104920469	LOC104920469	USP6 N-terminal-like protein, transcript variant X1	0.001	0.0270008	down	3.46	0	1.23	0	0	0	1.56333	0
rna-XM_027291490.1	gene-map4k4	map4k4	mitogen-activated protein kinase kinase kinase kinase 4, transcript variant X8	0.043	0.0270207	down	0.7	0.22	0.41	0.05	0	0	0.443333	0.0166667
rna-XM_010757288.3	gene-LOC104940635	LOC104940635	methionine aminopeptidase 2, transcript variant X1	0.593	0.0270982	down	12.75	16.04	13	9.92	5.42	10.03	13.93	8.45667
rna-XM_027289942.1	gene-myo9b	myo9b	myosin IXB, transcript variant X1	0.002	0.0271509	down	0.71	0	0.63	0	0	0	0.446667	0
rna-XM_019275379.2	gene-sap130	sap130	Sin3A associated protein 130, transcript variant X3	0.433	0.0271987	down	1.04	2.18	1.51	0.71	0.45	0.95	1.57667	0.703333
rna-XM_027277149.1	gene-LOC104928147	LOC104928147	tripartite motif-containing protein 16-like protein, transcript variant X2	0.631	0.0272393	down	6.13	7.56	5.37	3.16	4.09	5.09	6.35333	4.11333
rna-XM_019274401.2	gene-LOC104918039	LOC104918039	Down syndrome cell adhesion molecule-like protein 1 homolog, transcript variant X1	0.017	0.0273448	down	0.46	0	0.24	0	0	0.01	0.233333	0.00333333
rna-XM_027284950.1	gene-znf326	znf326	zinc finger protein 326, transcript variant X1	0.659	0.0273759	down	4.55	4.63	4.75	2.93	3.21	3.24	4.64333	3.12667
rna-XM_027289692.1	gene-cic	cic	capicua transcriptional repressor, transcript variant X2	0.001	0.0276632	down	0	0.33	0.96	0	0	0	0.43	0
rna-XM_027277907.1	gene-LOC104936293	LOC104936293	lysine-specific demethylase 2B, transcript variant X1	0.034	0.0276747	down	0.89	4.18	9.5	0	0.51	0	4.85667	0.17
rna-XM_019277195.2	gene-LOC104922333	LOC104922333	kinesin-like protein KIF23, transcript variant X2	0.645	0.0278246	down	5.04	4.22	5.63	2.58	4.17	3.07	4.96333	3.27333
rna-XM_010757131.3	gene-tsku	tsku	tsukushi, small leucine rich proteoglycan, transcript variant X2	0.002	0.0279122	down	0	2.26	1.52	0	0	0	1.26	0
rna-XM_027276156.1	gene-pdcl3	pdcl3	phosducin like 3, transcript variant X1	0.031	0.0279793	down	0.33	0.15	0.15	0	0	0	0.21	0
rna-XM_010738494.3	gene-uros	uros	uroporphyrinogen III synthase, transcript variant X1	0.56	0.0279974	down	12.19	14.53	11.41	5.49	5.8	10.54	12.71	7.27667
rna-XM_027282602.1	gene-saraf	saraf	store-operated calcium entry associated regulatory factor, transcript variant X2	0.001	0.0281612	down	1.45	4.62	0	0	0	0	2.02333	0
rna-XM_027279521.1	gene-pex7	pex7	peroxisomal biogenesis factor 7, transcript variant X2	0.044	0.0282006	down	0.83	0.44	0.36	0	0	0.06	0.543333	0.02
rna-XM_027279287.1	gene-LOC104933193	LOC104933193	kinesin-like protein KIF26A	0.019	0.0283103	down	0	0.72	0.6	0.01	0	0.01	0.44	0.00666667
rna-XM_019273127.2	gene-ppp4r3a	ppp4r3a	protein phosphatase 4 regulatory subunit 3A, transcript variant X3	0.635	0.0283382	down	7.15	4.91	5.94	3.16	3.26	5.26	6	3.89333
rna-XM_027279308.1	gene-LOC104938413	LOC104938413	ribonucleoside-diphosphate reductase subunit M2, transcript variant X3	0.596	0.0283548	down	8.18	6.86	5.58	3.78	5.31	3.43	6.87333	4.17333
rna-XM_010755087.3	gene-LOC104938666	LOC104938666	myocyte-specific enhancer factor 2C, transcript variant X1	0.01	0.0283775	down	0.02	0.39	0	0	0	0	0.136667	0
rna-XM_010746792.3	gene-zup1	zup1	zinc finger containing ubiquitin peptidase 1, transcript variant X4	0.305	0.0284165	down	3.14	1.07	1.76	0.47	0.51	0.86	1.99	0.613333
rna-XM_010749447.3	gene-LOC104933902	LOC104933902	acidic mammalian chitinase-like	0.055	0.0286585	down	0.47	0.21	1.46	0.07	0.04	0	0.713333	0.0366667
rna-XM_010738394.3	gene-sap30bp	sap30bp	SAP30 binding protein, transcript variant X2	0.003	0.0287017	down	0	2.88	3.34	0	0	0	2.07333	0
rna-XM_010741613.3	gene-pck2	pck2	phosphoenolpyruvate carboxykinase 2, mitochondrial	0.532	0.0287022	down	3.14	2.62	1.9	0.93	1.58	1.65	2.55333	1.38667
rna-XM_027284279.1	gene-ankrd6	ankrd6	ankyrin repeat domain 6, transcript variant X7	0.002	0.0287073	down	1.48	0	1.2	0	0	0	0.893333	0
rna-XM_010744686.3	gene-LOC104930021	LOC104930021	actin-related protein 2-A, transcript variant X1	0.17	0.0287382	down	15.1	11.68	2.29	3.06	1.56	0.37	9.69	1.66333
rna-XM_027285656.1	gene-LOC113747132	LOC113747132	tripartite motif-containing protein 16-like	0.647	0.0289724	down	16.69	15.52	20.87	13.62	13.02	8.4	17.6933	11.68
rna-XM_027282271.1	gene-tmem70	tmem70	transmembrane protein 70, transcript variant X3	0.037	0.0290405	down	0.38	0.35	0.34	0	0	0	0.356667	0
rna-XM_019261326.2	gene-chd3	chd3	chromodomain helicase DNA binding protein 3, transcript variant X1	0.002	0.0292315	down	1.01	0	0.44	0	0	0	0.483333	0
rna-XM_027276376.1	gene-LOC104939640	LOC104939640	stonustoxin subunit beta-like, transcript variant X2	0.025	0.0293041	down	0.13	0.03	0.16	0	0	0	0.106667	0
rna-XM_027274120.1	gene-svil	svil	supervillin, transcript variant X10	0.037	0.0293547	down	0.02	0.02	0.03	0	0	0	0.0233333	0
rna-XM_010730519.3	gene-LOC104918690	LOC104918690	hemoglobin subunit beta	0.603	0.0295716	down	24264.1	32083.5	25808.5	23260	12874.9	13980.2	27385.4	16705
rna-XM_027277935.1	gene-dock3	dock3	dedicator of cytokinesis 3, transcript variant X5	0.02	0.0295868	down	0.01	0.07	0.05	0	0	0	0.0433333	0
rna-XM_010733290.3	gene-chrd	chrd	chordin	0.035	0.0296013	down	0.03	0.06	0.06	0	0	0	0.05	0
rna-XM_027275394.1	gene-LOC104938791	LOC104938791	collagen alpha-6(VI) chain-like, transcript variant X2	0.003	0.0296449	down	0.73	0.54	0	0	0	0	0.423333	0
rna-XR_002042997.2	gene-cd226	cd226	CD226 molecule, transcript variant X5	0.027	0.0296496	down	0.61	0.46	0	0	0	0	0.356667	0
rna-XM_019267226.2	gene-rab42	rab42	RAB42, member RAS oncogene family, transcript variant X2	0.454	0.0298053	down	0.92	1.96	1.54	0.55	0.86	0.65	1.47333	0.686667
rna-XM_027279498.1	gene-nop56	nop56	NOP56 ribonucleoprotein	0.455	0.0299209	down	39.86	30.36	12.2	10.75	15.54	11.87	27.4733	12.72
rna-XM_010739543.3	gene-tp63	tp63	tumor protein p63, transcript variant X9	0.003	0.0300524	down	1.27	0	1.39	0	0	0	0.886667	0
rna-XM_010746992.3	gene-LOC104931883	LOC104931883	protocadherin-10, transcript variant X2	0.097	0.0301645	down	0.83	0.86	1.33	0	0.11	0.19	1.00667	0.1
rna-XM_010745211.3	gene-LOC104930425	LOC104930425	calcitonin gene-related peptide type 1 receptor	0.001	0.0303863	down	0.89	0	4.31	0	0	0	1.73333	0
rna-XM_027290955.1	gene-dop1b	dop1b	DOP1 leucine zipper like protein B, transcript variant X1	0.002	0.0305612	down	1.92	0	0	0	0	0	0.64	0
rna-XM_010733805.3	gene-LOC104921315	LOC104921315	pre-mRNA-splicing factor ATP-dependent RNA helicase DHX15, transcript variant X2	0.458	0.0306192	down	2.73	3.54	6.5	1.77	2.71	1.51	4.25667	1.99667
rna-XM_010734640.3	gene-LOC104921950	LOC104921950	regulator of G protein signaling 12, transcript variant X1	0.002	0.0306629	down	1.12	0.38	0	0	0	0	0.5	0
rna-XM_027282726.1	gene-LOC104930269	LOC104930269	Fc receptor-like protein 3, transcript variant X1	0.608	0.0307278	down	6.32	7.07	5.6	4.37	2.64	4.8	6.33	3.93667
rna-XM_010741252.3	gene-snap25	snap25	synaptosome associated protein 25, transcript variant X1	0.035	0.0307747	down	0.29	0.18	0.45	0	0	0	0.306667	0
rna-XM_027282827.1	gene-LOC104936946	LOC104936946	oxysterol-binding protein 1, transcript variant X2	0.047	0.0307765	down	0.5	0.37	0.37	0	0.06	0	0.413333	0.02
rna-XM_027289358.1	gene-kiaa0556	kiaa0556	KIAA0556 ortholog, transcript variant X3	0.003	0.0308071	down	0	0.6	0.61	0	0	0	0.403333	0
rna-XM_019270300.2	gene-mbnl1	mbnl1	muscleblind like splicing regulator 1, transcript variant X7	0.003	0.030925	down	0.64	0	0.55	0	0	0	0.396667	0
rna-XM_019271344.2	gene-LOC104935191	LOC104935191	rho GTPase-activating protein 23, transcript variant X4	0.003	0.0311071	down	0.42	0.57	0	0	0	0	0.33	0
rna-XM_027285115.1	gene-LOC109136602	LOC109136602	putative cyclin-dependent serine/threonine-protein kinase DDB_G0272797/DDB_G0274007, transcript variant X3	0.034	0.0312364	down	0	0.06	0.06	0	0	0	0.04	0
rna-XM_019264331.2	gene-ehmt2	ehmt2	euchromatic histone lysine methyltransferase 2, transcript variant X7	0.003	0.0313055	down	0	0.93	0.64	0	0	0	0.523333	0
rna-XM_027289570.1	gene-LOC104929149	LOC104929149	somatostatin receptor type 2, transcript variant X2	0.294	0.0313834	down	0.33	0.23	0.34	0.08	0.12	0.07	0.3	0.09
rna-XM_027290105.1	gene-mast2	mast2	microtubule associated serine/threonine kinase 2, transcript variant X3	0.003	0.0314346	down	0.37	0.28	0	0	0	0	0.216667	0
rna-XR_003461961.1	gene-LOC113745067	LOC113745067	uncharacterized LOC113745067	0.091	0.0316155	down	0.33	0.58	0.82	0	0	0.01	0.576667	0.00333333
rna-XM_027274870.1	gene-LOC104921403	LOC104921403	ras-related protein Rab-15-like	0.069	0.0319414	down	0.9	0.37	0.23	0.05	0	0.04	0.5	0.03
rna-XR_003463202.1	gene-LOC104926712	LOC104926712	protein farnesyltransferase subunit beta, transcript variant X2	0.28	0.0319893	down	4.84	4.28	1.97	1.38	0.37	1.41	3.69667	1.05333
rna-XM_019255171.2	gene-chn2	chn2	chimerin 2, transcript variant X2	0.039	0.032071	down	0.12	0.05	0.08	0	0	0	0.0833333	0
rna-XM_027275198.1	gene-LOC104918999	LOC104918999	coiled-coil domain-containing protein 158, transcript variant X1	0.573	0.0321601	down	2.54	1.97	2.85	1.16	1.27	1.89	2.45333	1.44
rna-XM_027276892.1	gene-LOC104939709	LOC104939709	serine/threonine-protein kinase ppk4, transcript variant X7	0.003	0.0322663	down	0.72	0	1.16	0	0	0	0.626667	0
rna-XM_027290751.1	gene-LOC104932497	LOC104932497	interferon alpha/beta receptor 1a, transcript variant X4	0.003	0.0323059	down	4.65	0	0	0	0	0	1.55	0
rna-XM_010750441.3	gene-fundc1	fundc1	FUN14 domain containing 1	0.003	0.0325232	down	5.68	2.08	0	0	0	0	2.58667	0
rna-XM_027291242.1	gene-trpm2	trpm2	transient receptor potential cation channel subfamily M member 2, transcript variant X2	0.518	0.0325844	down	1.42	2.13	1.81	1.24	0.57	1.04	1.78667	0.95
rna-XM_027288332.1	gene-LOC104928353	LOC104928353	SPRY domain-containing protein 3	0.265	0.0325884	down	1.77	3.16	4.47	0.29	1.72	0.55	3.13333	0.853333
rna-XM_027283334.1	gene-gab1	gab1	GRB2 associated binding protein 1, transcript variant X2	0.002	0.0325914	down	0.46	1.87	0	0	0	0	0.776667	0
rna-XM_027283606.1	gene-LOC113746699	LOC113746699	tripartite motif-containing protein 16-like	0.562	0.0326092	down	5.34	7.07	4.09	3.42	3.45	2.6	5.5	3.15667
rna-XM_010730803.3	gene-bricd5	bricd5	BRICHOS domain containing 5, transcript variant X2	0.041	0.0327048	down	0.11	0.06	0.1	0	0	0	0.09	0
rna-XM_027291959.1	gene-dgki	dgki	diacylglycerol kinase iota, transcript variant X5	0.004	0.0327292	down	0	0.4	0.4	0	0	0	0.266667	0
rna-XM_027282997.1	gene-LOC109139820	LOC109139820	uncharacterized LOC109139820	0.019	0.0328223	down	0.49	0.87	0.06	0	0	0	0.473333	0
rna-XR_002042586.2	gene-tnpo1	tnpo1	transportin 1, transcript variant X2	0.039	0.0329701	down	0.05	0.06	0.11	0	0	0	0.0733333	0
rna-XM_027280621.1	gene-snrpa	snrpa	small nuclear ribonucleoprotein polypeptide A	0.003	0.0329749	down	0	1.89	4.11	0	0	0	2	0
rna-XM_010757052.3	gene-LOC104940444	LOC104940444	guanine nucleotide-binding protein G(i) subunit alpha-1	0.553	0.0330678	down	11.34	19.34	10.51	5.44	8.19	9.81	13.73	7.81333
rna-XM_010732314.3	gene-LOC104920146	LOC104920146	cathepsin B	0.658	0.0331502	down	1437.71	2502.45	2363.33	1329.02	1461.03	1467.42	2101.16	1419.16
rna-XM_027288305.1	gene-LOC109136736	LOC109136736	hemoglobin embryonic subunit alpha-like, transcript variant X2	0.56	0.033298	down	5181.53	7237.71	5070.61	4738.6	2237.19	2855.31	5829.95	3277.03
rna-XM_010733628.3	gene-LOC104921169	LOC104921169	cdc42-interacting protein 4 homolog, transcript variant X2	0.655	0.0334103	down	8	11.77	11.48	8.36	5.42	7.23	10.4167	7.00333
rna-XM_027277132.1	gene-asah2	asah2	N-acylsphingosine amidohydrolase 2, transcript variant X2	0.019	0.0334187	down	0.03	0.4	0.12	0	0	0	0.183333	0
rna-XM_027274807.1	gene-kdm1a	kdm1a	lysine demethylase 1A, transcript variant X2	0.553	0.0334646	down	1.83	1.21	1.74	0.89	0.91	0.89	1.59333	0.896667
rna-XM_027277481.1	gene-myo1h	myo1h	myosin IH	0.029	0.0336067	down	0.08	0.01	0.07	0	0	0	0.0533333	0
rna-XM_019274811.2	gene-emsy	emsy	EMSY, BRCA2 interacting transcriptional repressor, transcript variant X1	0.004	0.0337639	down	0.6	0	0.49	0	0	0	0.363333	0
rna-XM_019269580.2	gene-LOC104938557	LOC104938557	ubinuclein-2, transcript variant X1	0.002	0.0337746	down	2	0	0.35	0	0	0	0.783333	0
rna-XM_027290109.1	gene-mast2	mast2	microtubule associated serine/threonine kinase 2, transcript variant X7	0.004	0.0339393	down	0	0.33	0.23	0	0	0	0.186667	0
rna-XM_027289370.1	gene-srcap	srcap	Snf2 related CREBBP activator protein, transcript variant X1	0.016	0.0339911	down	0.97	0	1.05	0	0	0.03	0.673333	0.01
rna-XM_010752495.3	gene-LOC104936447	LOC104936447	cell surface glycoprotein MUC18, transcript variant X4	0.004	0.0340464	down	1.12	0.53	0	0	0	0	0.55	0
rna-XM_019279064.2	gene-LOC104940385	LOC104940385	serine/threonine-protein phosphatase 2A 56 kDa regulatory subunit gamma isoform, transcript variant X3	0.004	0.0340742	down	0	0.66	0.54	0	0	0	0.4	0
rna-XM_027286823.1	gene-rhbdl2	rhbdl2	rhomboid like 2, transcript variant X2	0.004	0.0341057	down	1.77	0.88	0	0	0	0	0.883333	0
rna-XM_027276501.1	gene-LOC104938779	LOC104938779	carbonic anhydrase, transcript variant X2	0.567	0.0341816	down	25.93	25.67	23.28	22.04	11.37	9.93	24.96	14.4467
rna-XM_027288553.1	gene-LOC104933283	LOC104933283	transcriptional enhancer factor TEF-5-like	0.293	0.0342703	down	1.76	0.87	0.65	0.16	0.36	0.45	1.09333	0.323333
rna-XM_027291829.1	gene-LOC113748350	LOC113748350	protein NLRC3-like	0.598	0.0343484	down	4.46	4.93	6.82	3.27	3.45	3.19	5.40333	3.30333
rna-XM_027288154.1	gene-LOC113747653	LOC113747653	zinc-binding protein A33-like	0.034	0.0344167	down	0.13	0.52	0.37	0	0	0	0.34	0
rna-XM_027290285.1	gene-LOC104919067	LOC104919067	cytoplasmic polyadenylation element-binding protein 2, transcript variant X2	0.004	0.0344465	down	0.53	0.56	0	0	0	0	0.363333	0
rna-XR_003464189.1	gene-LOC109138026	LOC109138026	uncharacterized LOC109138026, transcript variant X2	0.037	0.034484	down	0.38	0.12	0.17	0	0	0	0.223333	0
rna-XM_027277569.1	gene-tnip1	tnip1	TNFAIP3 interacting protein 1, transcript variant X4	0.054	0.0345075	down	6.33	2.37	7.03	0.85	0	0	5.24333	0.283333
rna-XM_027284924.1	gene-cenpt	cenpt	centromere protein T, transcript variant X8	0.004	0.0345093	down	1.02	0.9	0	0	0	0	0.64	0
rna-XM_027277835.1	gene-LOC104933118	LOC104933118	mothers against decapentaplegic homolog 4, transcript variant X1	0.004	0.0345981	down	0.71	0.39	0	0	0	0	0.366667	0
rna-XM_019274204.2	gene-osbpl6	osbpl6	oxysterol binding protein like 6, transcript variant X2	0.002	0.0347191	down	1.32	0.23	0	0	0	0	0.516667	0
rna-XR_003463844.1	gene-LOC104928632	LOC104928632	lysine-specific demethylase 9, transcript variant X2	0.004	0.0347739	down	0.73	0	0.44	0	0	0	0.39	0
rna-XM_027290351.1	gene-babam1	babam1	BRISC and BRCA1 A complex member 1, transcript variant X2	0.004	0.0348234	down	1.98	1.28	0	0	0	0	1.08667	0
rna-XM_027275047.1	gene-mark3	mark3	microtubule affinity regulating kinase 3, transcript variant X3	0.412	0.0348388	down	2.15	3.31	2.03	1.65	0.56	0.94	2.49667	1.05
rna-XM_027282102.1	gene-LOC104934130	LOC104934130	poly(ADP-ribose) glycohydrolase, transcript variant X2	0.312	0.0349907	down	3.15	9.27	8.36	4.13	1.14	1.39	6.92667	2.22
rna-XM_027281712.1	gene-akap13	akap13	A-kinase anchoring protein 13, transcript variant X2	0.004	0.0350771	down	0	0	0.56	0	0	0	0.186667	0
rna-XM_027274678.1	gene-tiam2	tiam2	T cell lymphoma invasion and metastasis 2, transcript variant X3	0.644	0.0351033	down	1.54	1.34	1.24	0.99	0.76	0.96	1.37333	0.903333
rna-XM_027281342.1	gene-znf280d	znf280d	zinc finger protein 280D	0.005	0.0351596	down	0	0.59	0.59	0	0	0	0.393333	0
rna-XM_027289808.1	gene-LOC104923276	LOC104923276	myoferlin, transcript variant X3	0.54	0.0351844	down	1.44	2.13	1.81	0.81	1.46	0.72	1.79333	0.996667
rna-XM_019260171.2	gene-LOC104931845	LOC104931845	regulator of G-protein signaling 17, transcript variant X1	0.004	0.0355808	down	0	0.92	0.48	0	0	0	0.466667	0
rna-XM_010747835.3	gene-LOC104932573	LOC104932573	rho GTPase-activating protein 12, transcript variant X1	0.017	0.0355915	down	0	1.05	0.81	0	0	0.03	0.62	0.01
rna-XM_010746760.3	gene-kdm1a	kdm1a	lysine demethylase 1A, transcript variant X4	0.004	0.0357291	down	1.98	0	0	0	0	0	0.66	0
rna-XM_027275028.1	gene-nusap1	nusap1	nucleolar and spindle associated protein 1, transcript variant X3	0.004	0.0357621	down	0	2.11	0.96	0	0	0	1.02333	0
rna-XM_019277665.2	gene-LOC104936024	LOC104936024	MICOS complex subunit mic25a, transcript variant X3	0.04	0.035794	down	0.12	0.1	0.27	0	0	0	0.163333	0
rna-XM_027277661.1	gene-mpdz	mpdz	multiple PDZ domain crumbs cell polarity complex component, transcript variant X4	0.005	0.0358679	down	0	0.33	0.22	0	0	0	0.183333	0
rna-XM_027279284.1	gene-LOC113745854	LOC113745854	kinase D-interacting substrate of 220 kDa B, transcript variant X1	0.004	0.0359534	down	0.56	0	0.27	0	0	0	0.276667	0
rna-XM_027286031.1	gene-ascc3	ascc3	activating signal cointegrator 1 complex subunit 3, transcript variant X3	0.004	0.0360053	down	0.23	0	0.44	0	0	0	0.223333	0
rna-XM_027283147.1	gene-dclk2	dclk2	doublecortin like kinase 2, transcript variant X5	0.005	0.0361185	down	0	0.45	0.35	0	0	0	0.266667	0
rna-XR_003463041.1	gene-LOC109141470	LOC109141470	uncharacterized LOC109141470	0.043	0.0363131	down	0.32	0.15	0.15	0	0	0	0.206667	0
rna-XM_019254040.2	gene-dcun1d2	dcun1d2	defective in cullin neddylation 1 domain containing 2, transcript variant X5	0.005	0.0363621	down	0.74	0.6	0	0	0	0	0.446667	0
rna-XM_010753697.3	gene-tcerg1	tcerg1	transcription elongation regulator 1, transcript variant X4	0.637	0.0363837	down	3.06	2.95	2.05	1.96	1.78	1.51	2.68667	1.75
rna-XM_019268386.2	gene-LOC104939237	LOC104939237	rho GTPase-activating protein 39, transcript variant X5	0.005	0.0363985	down	0	0.34	0.71	0	0	0	0.35	0
rna-XR_003462236.1	gene-LOC109142197	LOC109142197	uncharacterized LOC109142197, transcript variant X2	0.005	0.0365003	down	0	0.63	0.28	0	0	0	0.303333	0
rna-XM_019254797.2	gene-recql4	recql4	RecQ like helicase 4, transcript variant X2	0.005	0.0367643	down	0.53	0.31	0	0	0	0	0.28	0
rna-XM_019274891.2	gene-LOC104937264	LOC104937264	polyubiquitin	0.569	0.0369123	down	874.13	1557.7	1481.6	762.27	983.03	527.26	1304.48	757.52
rna-XM_019273480.2	gene-LOC109141780	LOC109141780	poly [ADP-ribose] polymerase 11, transcript variant X2	0.599	0.0369144	down	25.65	31.09	46	26.95	19.1	16.72	34.2467	20.9233
rna-XM_010730907.3	gene-LOC104919005	LOC104919005	RNA exonuclease 1 homolog, transcript variant X4	0.002	0.0370915	down	3.15	0.28	0	0	0	0	1.14333	0
rna-XM_027279032.1	gene-LOC104939093	LOC104939093	dnaJ homolog subfamily C member 16, transcript variant X2	0.003	0.0371089	down	0	0.26	1.4	0	0	0	0.553333	0
rna-XM_019275457.2	gene-LOC104940563	LOC104940563	tax1-binding protein 1 homolog A, transcript variant X4	0.002	0.0374921	down	3.08	0.24	0	0	0	0	1.10667	0
rna-XM_027286367.1	gene-ptpn23	ptpn23	protein tyrosine phosphatase, non-receptor type 23	0.003	0.0377127	down	1.06	0.15	0	0	0	0	0.403333	0
rna-XM_027290081.1	gene-LOC104921728	LOC104921728	Hypothetical protein, transcript variant X2	0.006	0.0377203	down	0	0.44	0.3	0	0	0	0.246667	0
rna-XM_019260829.2	gene-pyroxd2	pyroxd2	pyridine nucleotide-disulphide oxidoreductase domain 2, transcript variant X1	0.006	0.0379828	down	0.84	0.98	0	0	0	0	0.606667	0
rna-XM_019253300.2	gene-LOC104924763	LOC104924763	lymphoid-restricted membrane protein, transcript variant X1	0.006	0.0380086	down	0.41	0.29	0	0	0	0	0.233333	0
rna-XM_010754829.3	gene-gcc1	gcc1	GRIP and coiled-coil domain containing 1, transcript variant X1	0.005	0.0380153	down	1.16	0.49	0	0	0	0	0.55	0
rna-XM_010745514.3	gene-pold2	pold2	DNA polymerase delta 2, accessory subunit, transcript variant X2	0.532	0.0382045	down	4.21	5.83	4.7	1.57	3.16	3.32	4.91333	2.68333
rna-XM_010734968.3	gene-traip	traip	TRAF interacting protein	0.62	0.0382737	down	3.21	3.43	4	2.56	2.09	2.09	3.54667	2.24667
rna-XM_027285274.1	gene-atxn2l	atxn2l	ataxin 2 like, transcript variant X3	0.005	0.0384708	down	0.41	0.86	0	0	0	0	0.423333	0
rna-XM_027275836.1	gene-nvl	nvl	nuclear VCP-like, transcript variant X2	0.006	0.0385217	down	0.74	0.7	0	0	0	0	0.48	0
rna-XM_027274986.1	gene-LOC104929991	LOC104929991	DNA (cytosine-5)-methyltransferase 3A, transcript variant X4	0.005	0.0386343	down	0.2	0.45	0	0	0	0	0.216667	0
rna-XM_010733977.3	gene-gabrd	gabrd	gamma-aminobutyric acid type A receptor delta subunit	0.149	0.0386532	down	0.32	0.37	0.15	0.05	0.03	0.05	0.28	0.0433333
rna-XM_027278890.1	gene-LOC104925141	LOC104925141	serine/threonine-protein kinase WNK2, transcript variant X10	0.042	0.0386813	down	0.03	0.01	0.02	0	0	0	0.02	0
rna-XM_027273931.1	gene-LOC104919444	LOC104919444	platelet-derived growth factor receptor beta, transcript variant X3	0.006	0.0387037	down	0	0.47	0.5	0	0	0	0.323333	0
rna-XM_019266614.2	gene-LOC104933546	LOC104933546	protein KHNYN, transcript variant X2	0.594	0.0387705	down	5.15	4.97	9.6	3.5	3.72	4.79	6.57333	4.00333
rna-XM_027272796.1	gene-ptdss2	ptdss2	phosphatidylserine synthase 2, transcript variant X2	0.317	0.0387958	down	0.61	1.07	0.95	0.16	0.48	0.21	0.876667	0.283333
rna-XM_027290170.1	gene-rabgap1l	rabgap1l	RAB GTPase activating protein 1 like, transcript variant X2	0.27	0.0389033	down	0.19	0.54	0.25	0.1	0.09	0.08	0.326667	0.09
rna-XM_010732454.3	gene-sema6d	sema6d	semaphorin 6D, transcript variant X5	0.006	0.0390374	down	0.4	0.23	0	0	0	0	0.21	0
rna-XM_027274012.1	gene-pdss1	pdss1	decaprenyl diphosphate synthase subunit 1, transcript variant X2	0.005	0.0392199	down	0	0.47	1.24	0	0	0	0.57	0
rna-XM_027279168.1	gene-LOC104932906	LOC104932906	apoptotic chromatin condensation inducer in the nucleus	0.006	0.0394291	down	0	0.6	0.26	0	0	0	0.286667	0
rna-XM_027281237.1	gene-LOC113746275	LOC113746275	isocitrate dehydrogenase [NAD] subunit alpha, mitochondrial-like, transcript variant X2	0.247	0.0395906	down	2.29	1.4	1.94	0.15	0.5	0.76	1.87667	0.47
rna-XM_019272710.2	gene-necap2	necap2	NECAP endocytosis associated 2	0.614	0.039603	down	14.75	8.38	14.05	8.35	9.14	5.73	12.3933	7.74
rna-XM_010742245.3	gene-sigmar1	sigmar1	sigma non-opioid intracellular receptor 1, transcript variant X2	0.004	0.0396792	down	0	2.61	0	0	0	0	0.87	0
rna-XM_027280576.1	gene-urb1	urb1	URB1 ribosome biogenesis homolog, transcript variant X2	0.055	0.0397831	down	1.37	0.64	0.6	0	0	0.14	0.87	0.0466667
rna-XM_027277530.1	gene-ralgds	ralgds	ral guanine nucleotide dissociation stimulator, transcript variant X6	0.006	0.0398377	down	0	0.18	0.31	0	0	0	0.163333	0
rna-XM_010757011.3	gene-qki	qki	QKI, KH domain containing RNA binding, transcript variant X1	0.006	0.0399144	down	0	0.66	0.89	0	0	0	0.516667	0
rna-XM_010737465.3	gene-cobll1	cobll1	cordon-bleu WH2 repeat protein like 1, transcript variant X3	0.006	0.0399193	down	0.6	0.38	0	0	0	0	0.326667	0
rna-XM_027278628.1	gene-nadk2	nadk2	NAD kinase 2, mitochondrial, transcript variant X8	0.006	0.0401907	down	0	0.73	0.45	0	0	0	0.393333	0
rna-XM_019271143.2	gene-mcf2l	mcf2l	MCF.2 cell line derived transforming sequence like, transcript variant X4	0.593	0.0402447	down	7.87	6.99	5.49	4.14	5.62	2.56	6.78333	4.10667
rna-XM_027274118.1	gene-ccny	ccny	cyclin Y, transcript variant X5	0.006	0.0402487	down	0.26	0	0.43	0	0	0	0.23	0
rna-XM_027277079.1	gene-syde1	syde1	synapse defective Rho GTPase homolog 1, transcript variant X1	0.007	0.0402492	down	0	0.39	0.35	0	0	0	0.246667	0
rna-XM_027289965.1	gene-LOC104920550	LOC104920550	lactosylceramide 1,3-N-acetyl-beta-D-glucosaminyltransferase A, transcript variant X7	0.313	0.040322	down	8.89	10.06	7.33	5.75	0.94	1.68	8.76	2.79
rna-XM_027277296.1	gene-wdr92	wdr92	WD repeat domain 92, transcript variant X2	0.466	0.0403418	down	2.06	3.96	3.2	1.74	1.3	1.37	3.07333	1.47
rna-XM_027286301.1	gene-LOC104940361	LOC104940361	DENN domain-containing protein 3, transcript variant X3	0.006	0.0403814	down	0.45	0	0.33	0	0	0	0.26	0
rna-XM_027290143.1	gene-LOC104932408	LOC104932408	TBC1 domain family member 7, transcript variant X1	0.006	0.0404854	down	1.14	0	1.75	0	0	0	0.963333	0
rna-XM_027279194.1	gene-aggf1	aggf1	angiogenic factor with G-patch and FHA domains 1, transcript variant X1	0.665	0.0405102	down	6.51	3.86	4.94	2.88	4.01	3.49	5.10333	3.46
rna-XM_010745885.3	gene-LOC104930975	LOC104930975	probable phosphatase phospho1, transcript variant X2	0.443	0.0405196	down	1.47	2.96	2.36	0.97	0.59	1.54	2.26333	1.03333
rna-XM_019254940.2	gene-LOC104917954	LOC104917954	rho guanine nucleotide exchange factor 10-like protein, transcript variant X1	0.004	0.0406433	down	0	0.68	0.1	0	0	0	0.26	0
rna-XM_027281638.1	gene-LOC104930375	LOC104930375	transcriptional repressor CTCF, transcript variant X2	0.471	0.0408301	down	1.35	0.76	1.17	0.6	0.47	0.51	1.09333	0.526667
rna-XM_010750976.3	gene-LOC104935172	LOC104935172	heme oxygenase	0.523	0.0408333	down	1039.91	2694.01	2266.47	900.77	1325.55	993.16	2000.13	1073.16
rna-XM_019256989.2	gene-LOC104929349	LOC104929349	rho GTPase-activating protein 7, transcript variant X4	0.007	0.0412043	down	0.45	0.24	0	0	0	0	0.23	0
rna-XM_010755026.3	gene-braf	braf	B-Raf proto-oncogene, serine/threonine kinase, transcript variant X2	0.02	0.0412788	down	0.33	0	0.51	0	0.01	0	0.28	0.00333333
rna-XM_027277896.1	gene-col25a1	col25a1	collagen type XXV alpha 1 chain, transcript variant X6	0.006	0.0414586	down	0.42	0	0.16	0	0	0	0.193333	0
rna-XM_027291051.1	gene-asmtl	asmtl	acetylserotonin O-methyltransferase like, transcript variant X1	0.457	0.0416552	down	2.92	3.59	3.95	2.67	1.21	1	3.48667	1.62667
rna-XM_019273133.2	gene-sts	sts	steroid sulfatase, transcript variant X1	0.007	0.0416668	down	0	0.39	0.78	0	0	0	0.39	0
rna-XM_027287256.1	gene-LOC113747436	LOC113747436	far upstream element-binding protein 3-like, transcript variant X8	0.004	0.0417242	down	0	0.47	3.1	0	0	0	1.19	0
rna-XM_019262601.2	gene-LOC104935046	LOC104935046	ATP-dependent RNA helicase DDX3X, transcript variant X7	0.003	0.0419734	down	0.81	0	0.08	0	0	0	0.296667	0
rna-XM_027276503.1	gene-LOC104938779	LOC104938779	carbonic anhydrase, transcript variant X4	0.003	0.0420354	down	44.24	0	0	0	0	0.14	14.7467	0.0466667
rna-XM_019261265.2	gene-cdca3	cdca3	cell division cycle associated 3, transcript variant X1	0.65	0.0421015	down	12.97	11.17	10.56	8.08	5.17	9.77	11.5667	7.67333
rna-XM_027272278.1	gene-LOC104926581	LOC104926581	GRAM domain-containing protein 4, transcript variant X5	0.007	0.0423424	down	0	0.52	0	0	0	0	0.173333	0
rna-XM_027288982.1	gene-srm	srm	spermidine synthase	0.008	0.0424639	down	0	0.78	0.69	0	0	0	0.49	0
rna-XM_019262333.2	gene-LOC104918256	LOC104918256	bromodomain adjacent to zinc finger domain protein 2B, transcript variant X2	0.114	0.0425385	down	0.69	1.11	0.86	0	0.07	0.24	0.886667	0.103333
rna-XM_027287306.1	gene-LOC113747463	LOC113747463	hamartin-like, transcript variant X3	0.025	0.0427318	down	0.39	0	0.11	0.01	0	0	0.166667	0.00333333
rna-XM_027280435.1	gene-LOC104920795	LOC104920795	signal transducer and activator of transcription 1-alpha/beta, transcript variant X2	0.611	0.0427609	down	7.82	11.2	15.45	8.16	7.82	5.63	11.49	7.20333
rna-XM_019253077.2	gene-mecom	mecom	MDS1 and EVI1 complex locus, transcript variant X6	0.008	0.0428396	down	0	0.29	0.18	0	0	0	0.156667	0
rna-XM_027283175.1	gene-nthl1	nthl1	nth like DNA glycosylase 1, transcript variant X2	0.007	0.0430199	down	0.73	1.26	0	0	0	0	0.663333	0
rna-XM_019275492.2	gene-LOC104935147	LOC104935147	H-2 class II histocompatibility antigen, I-E alpha chain-like, transcript variant X2	0.567	0.043159	down	8.42	5.2	5.49	3.87	4.32	2.8	6.37	3.66333
rna-XM_027278042.1	gene-LOC104920651	LOC104920651	uncharacterized LOC104920651, transcript variant X1	0.007	0.0431968	down	0.48	0	0.27	0	0	0	0.25	0
rna-XM_010751176.3	gene-dhrs13	dhrs13	dehydrogenase/reductase 13	0.628	0.0432407	down	2.86	3.34	3.62	2.41	1.97	1.92	3.27333	2.1
rna-XM_027278358.1	gene-gda	gda	guanine deaminase	0.491	0.0432893	down	2.38	6.85	3.9	2.27	2.28	2.09	4.37667	2.21333
rna-XM_010755466.3	gene-LOC104938990	LOC104938990	6-phosphofructo-2-kinase/fructose-2,6-bisphosphatase 4, transcript variant X1	0.007	0.0433969	down	0.48	0	0.84	0	0	0	0.44	0
rna-XM_010730564.3	gene-tmem184a	tmem184a	transmembrane protein 184A	0.049	0.0434683	down	0.07	0.06	0.02	0	0	0	0.05	0
rna-XM_027273272.1	gene-larp1	larp1	La ribonucleoprotein domain family member 1, transcript variant X6	0.008	0.0436232	down	0.19	0	0.19	0	0	0	0.126667	0
rna-XM_027277545.1	gene-LOC104936405	LOC104936405	malectin, transcript variant X2	0.008	0.0437343	down	0.32	0	0.19	0	0	0	0.17	0
rna-XM_027282155.1	gene-cplane1	cplane1	ciliogenesis and planar polarity effector 1, transcript variant X6	0.008	0.0437647	down	0	0.09	0.18	0	0	0	0.09	0
rna-XM_019264558.2	gene-sec24a	sec24a	SEC24 homolog A, COPII coat complex component, transcript variant X1	0.008	0.0438312	down	0.41	0.23	0	0	0	0	0.213333	0
rna-XM_019256495.2	gene-znf512b	znf512b	zinc finger protein 512B, transcript variant X7	0.005	0.0438857	down	0	0.62	0.09	0	0	0	0.236667	0
rna-XM_027272097.1	gene-LOC113744057	LOC113744057	olfactomedin-like	0.588	0.0439307	down	22.55	11.33	9.82	8.83	8.3	8.93	14.5667	8.68667
rna-XM_027283692.1	gene-LOC104932196	LOC104932196	carboxypeptidase Z, transcript variant X1	0.008	0.0441202	down	0	0.56	0.34	0	0	0	0.3	0
rna-XM_027289858.1	gene-kif14	kif14	kinesin family member 14, transcript variant X1	0.007	0.0441243	down	0.35	0	0.15	0	0	0	0.166667	0
rna-XM_027277523.1	gene-LOC104930256	LOC104930256	apoptosis-stimulating of p53 protein 2, transcript variant X2	0.008	0.0443209	down	0.35	0	0.21	0	0	0	0.186667	0
rna-XM_027278210.1	gene-nfib	nfib	nuclear factor I B, transcript variant X4	0.008	0.0444507	down	0.23	0	0.12	0	0	0	0.116667	0
rna-XM_019265125.2	gene-tmod1	tmod1	tropomodulin 1, transcript variant X4	0.008	0.0444958	down	0.3	0.42	0	0	0	0	0.24	0
rna-XM_019258299.2	gene-LOC104934607	LOC104934607	desmin, transcript variant X2	0.008	0.0444977	down	0	1.3	0.56	0	0	0	0.62	0
rna-XM_027274029.1	gene-ipo4	ipo4	importin 4, transcript variant X2	0.623	0.044667	down	4.59	3.9	5	4.05	2.26	2.27	4.49667	2.86
rna-XM_027277592.1	gene-tnip1	tnip1	TNFAIP3 interacting protein 1, transcript variant X8	0.099	0.044686	down	0.94	0.51	0.38	0.04	0	0.14	0.61	0.06
rna-XM_027273294.1	gene-LOC113744312	LOC113744312	SLAIN motif-containing protein-like, transcript variant X2	0.058	0.0447045	down	0.37	0.2	0.29	0	0	0	0.286667	0
rna-XM_027282570.1	gene-LOC104922088	LOC104922088	gamma-adducin, transcript variant X6	0.006	0.0447388	down	0.6	0	0.14	0	0	0	0.246667	0
rna-XM_019253967.2	gene-ephb3	ephb3	EPH receptor B3, transcript variant X2	0.008	0.0449192	down	0.11	0	0.24	0	0	0	0.116667	0
rna-XM_010746618.3	gene-ubr5	ubr5	ubiquitin protein ligase E3 component n-recognin 5, transcript variant X8	0.008	0.0451135	down	0	0.08	0.2	0	0	0	0.0933333	0
rna-XM_027289042.1	gene-plekhm1	plekhm1	pleckstrin homology and RUN domain containing M1, transcript variant X2	0.009	0.0452018	down	0	0.24	0.31	0	0	0	0.183333	0
rna-XM_019278822.2	gene-LOC109143041	LOC109143041	ARF GTPase-activating protein GIT2, transcript variant X5	0.008	0.0452915	down	0	0	0.63	0	0	0	0.21	0
rna-XM_027280760.1	gene-blvrb	blvrb	biliverdin reductase B	0.611	0.045387	down	148.52	308.29	271.43	176.67	139.74	139.5	242.747	151.97
rna-XM_027276889.1	gene-LOC113745355	LOC113745355	gastrula zinc finger protein XlCGF9.1-like	0.049	0.0454836	down	0.36	1.3	0.68	0	0	0	0.78	0
rna-XM_027289776.1	gene-LOC104935904	LOC104935904	carnitine O-palmitoyltransferase 1, liver isoform, transcript variant X2	0.009	0.0455505	down	0.39	0	0.38	0	0	0	0.256667	0
rna-XM_019253779.2	gene-LOC104927066	LOC104927066	regulator of G protein signaling 14, transcript variant X3	0.009	0.0455967	down	0	0.33	0.69	0	0	0	0.34	0
rna-XM_027275736.1	gene-gtdc1	gtdc1	glycosyltransferase like domain containing 1, transcript variant X5	0.009	0.0456422	down	0.72	0.84	0	0	0	0	0.52	0
rna-XM_027291548.1	gene-LOC104925355	LOC104925355	uncharacterized LOC104925355	0.049	0.0456851	down	0.09	0.04	0.16	0	0	0	0.0966667	0
rna-XM_027273953.1	gene-LOC104934407	LOC104934407	solute carrier family 13 member 2, transcript variant X1	0.049	0.0456851	down	0.04	0.02	0.07	0	0	0	0.0433333	0
rna-XM_010738192.3	gene-smc4	smc4	structural maintenance of chromosomes 4, transcript variant X1	0.544	0.0459147	down	8.75	3.72	4.49	4.11	2.74	2.51	5.65333	3.12
rna-XM_027288064.1	gene-LOC104925006	LOC104925006	calcium/calmodulin-dependent protein kinase type II delta chain, transcript variant X1	0.005	0.0459891	down	1.27	0.15	0	0	0	0	0.473333	0
rna-XM_010746943.3	gene-zmynd11	zmynd11	zinc finger MYND-type containing 11, transcript variant X1	0.003	0.0461023	down	0.07	1.38	0	0	0	0	0.483333	0
rna-XM_027290444.1	gene-ift22	ift22	intraflagellar transport 22	0.009	0.046129	down	2.24	1.22	0	0	0	0	1.15333	0
rna-XM_027280974.1	gene-ap1ar	ap1ar	adaptor related protein complex 1 associated regulatory protein, transcript variant X3	0.009	0.046138	down	0.35	0.21	0	0	0	0	0.186667	0
rna-XM_027277194.1	gene-mamdc2	mamdc2	MAM domain containing 2, transcript variant X1	0.008	0.0464972	down	0	0.17	0.59	0	0	0	0.253333	0
rna-XM_027284830.1	gene-LOC104931116	LOC104931116	protein TANC2, transcript variant X7	0.009	0.0466349	down	0.1	0	0.16	0	0	0	0.0866667	0
rna-XM_010742341.3	gene-LOC104928118	LOC104928118	trafficking kinesin-binding protein 1, transcript variant X2	0.009	0.0466663	down	0.27	0	0.12	0	0	0	0.13	0
rna-XM_010736810.3	gene-LOC104923649	LOC104923649	guanine nucleotide-binding protein subunit alpha-11, transcript variant X1	0.098	0.0469412	down	0.1	0.13	0.12	0.01	0.02	0	0.116667	0.01
rna-XM_019259903.2	gene-ntrk2	ntrk2	neurotrophic receptor tyrosine kinase 2, transcript variant X1	0.01	0.0470022	down	0	0.17	0.12	0	0	0	0.0966667	0
rna-XM_027281286.1	gene-lama1	lama1	laminin subunit alpha 1, transcript variant X2	0.01	0.0470607	down	0.14	0.1	0	0	0	0	0.08	0
rna-XM_027278530.1	gene-prim2	prim2	DNA primase subunit 2, transcript variant X2	0.208	0.0470608	down	0.25	1.1	2.12	0.25	0.29	0.2	1.15667	0.246667
rna-XM_027288264.1	gene-plekhg5	plekhg5	pleckstrin homology and RhoGEF domain containing G5, transcript variant X1	0.007	0.0470996	down	0.82	0	0.18	0	0	0	0.333333	0
rna-XM_027279147.1	gene-LOC113744006	LOC113744006	uncharacterized LOC113744006, transcript variant X3	0.612	0.0471226	down	4.85	6.18	9.47	4.01	3.97	4.87	6.83333	4.28333
rna-XM_019261844.2	gene-LOC104919854	LOC104919854	uncharacterized LOC104919854	0.598	0.0471326	down	3.45	2.46	4.11	1.85	2.66	1.6	3.34	2.03667
rna-XM_027290790.1	gene-man1a2	man1a2	mannosidase alpha class 1A member 2, transcript variant X1	0.652	0.0471687	down	3.85	2.78	3.48	1.5	2.33	2.92	3.37	2.25
rna-XM_027284128.1	gene-epha7	epha7	EPH receptor A7, transcript variant X5	0.01	0.0472101	down	0.18	0	0.15	0	0	0	0.11	0
rna-XM_027283512.1	gene-LOC104937414	LOC104937414	pre-mRNA 3'-end-processing factor FIP1, transcript variant X5	0.008	0.0472652	down	0	0	2.32	0	0.01	0	0.773333	0.00333333
rna-XM_027280065.1	gene-abcc5	abcc5	ATP binding cassette subfamily C member 5, transcript variant X1	0.006	0.0473959	down	0.68	0.11	0	0	0	0	0.263333	0
rna-XM_019277930.2	gene-lgmn	lgmn	legumain	0.661	0.0474691	down	739.75	1236.6	1366.5	789	808.06	668.56	1114.28	755.207
rna-XM_027289732.1	gene-LOC104922252	LOC104922252	DNA-binding death effector domain-containing protein 2, transcript variant X2	0.025	0.0476474	down	0.8	0.43	0	0	0.02	0	0.41	0.00666667
rna-XR_003462764.1	gene-LOC104938639	LOC104938639	multidrug resistance-associated protein 1-like, transcript variant X6	0.01	0.0476717	down	0.15	0	0.15	0	0	0	0.1	0
rna-XM_027276351.1	gene-LOC113744989	LOC113744989	DDRGK domain-containing protein 1-like	0.005	0.0476855	down	2.86	0.3	0	0	0	0	1.05333	0
rna-XM_027286515.1	gene-LOC104935007	LOC104935007	gamma-enolase, transcript variant X3	0.057	0.0476915	down	0.04	0.1	0.07	0	0	0	0.07	0
rna-XM_027289819.1	gene-LOC104930402	LOC104930402	low-density lipoprotein receptor-related protein 2	0.057	0.0476915	down	0	0.01	0.01	0	0	0	0.00666667	0
rna-XR_003463251.1	gene-LOC104932466	LOC104932466	macoilin, transcript variant X3	0.057	0.04771	down	0.04	0.06	0.1	0	0	0	0.0666667	0
rna-XM_010743912.3	gene-LOC104929400	LOC104929400	metabotropic glutamate receptor 1, transcript variant X3	0.057	0.04771	down	0.02	0.03	0.04	0	0	0	0.03	0
rna-XM_019256898.2	gene-elmo2	elmo2	engulfment and cell motility 2, transcript variant X1	0.01	0.0478013	down	0	0.45	0.32	0	0	0	0.256667	0
rna-XM_010737494.3	gene-cdhr2	cdhr2	cadherin related family member 2	0.057	0.0478884	down	0.03	0.04	0.01	0	0	0	0.0266667	0
rna-XM_027273495.1	gene-fam222b	fam222b	family with sequence similarity 222 member B, transcript variant X3	0.01	0.0480717	down	0	0.3	0.23	0	0	0	0.176667	0
rna-XM_027284087.1	gene-abcd4	abcd4	ATP binding cassette subfamily D member 4, transcript variant X2	0.01	0.0481051	down	0.56	0	0.4	0	0	0	0.32	0
rna-XM_010742263.3	gene-LOC104928052	LOC104928052	apolipoprotein A-IV	0.057	0.0481192	down	0.22	0.07	0.14	0	0	0	0.143333	0
rna-XM_010756843.3	gene-ada2	ada2	adenosine deaminase 2, transcript variant X5	0.007	0.0481442	down	0.21	1.15	0	0	0	0	0.453333	0
rna-XM_019263573.2	gene-LOC104936968	LOC104936968	synaptophysin-like protein 2, transcript variant X2	0.384	0.0482603	down	6.58	1.46	6.2	2.52	1.56	1.45	4.74667	1.84333
rna-XM_027279999.1	gene-ift80	ift80	intraflagellar transport 80, transcript variant X1	0.365	0.0482665	down	1.33	0.54	1.83	0.36	0.62	0.4	1.23333	0.46
rna-XM_019267792.2	gene-LOC104935489	LOC104935489	sodium- and chloride-dependent taurine transporter, transcript variant X2	0.288	0.048282	down	5.1	1.54	8.86	2.6	0.61	1.33	5.16667	1.51333
rna-XM_019261895.2	gene-LOC104929813	LOC104929813	trinucleotide repeat-containing gene 6C protein, transcript variant X3	0.009	0.0483409	down	0.06	0	0.14	0	0	0	0.0666667	0
rna-XM_027291462.1	gene-LOC104932672	LOC104932672	arf-GAP with SH3 domain, ANK repeat and PH domain-containing protein 1, transcript variant X3	0.011	0.0485397	down	0	0.2	0.22	0	0	0	0.14	0
rna-XM_027291409.1	gene-erbb4	erbb4	erb-b2 receptor tyrosine kinase 4, transcript variant X1	0.008	0.0485921	down	0.06	0	0.24	0	0	0	0.1	0
rna-XM_027274771.1	gene-LOC104937664	LOC104937664	la-related protein 1B, transcript variant X6	0.487	0.0486373	down	1.37	0.84	0.95	0.73	0.46	0.36	1.05333	0.516667
rna-XM_010730701.3	gene-tom1l2	tom1l2	target of myb1 like 2 membrane trafficking protein, transcript variant X1	0.01	0.0487009	down	0.32	0	0.21	0	0	0	0.176667	0
rna-XM_019277422.2	gene-slc35f6	slc35f6	solute carrier family 35 member F6	0.633	0.0487472	down	56.15	104.44	100.22	50.6	68.65	50.27	86.9367	56.5067
rna-XM_019275469.2	gene-LOC104922864	LOC104922864	DNA-binding protein SATB1, transcript variant X2	0.01	0.0487546	down	0.37	0.17	0	0	0	0	0.18	0
rna-XM_027275662.1	gene-LOC104933535	LOC104933535	extracellular sulfatase Sulf-2, transcript variant X3	0.01	0.0488646	down	0.16	0	0.26	0	0	0	0.14	0
rna-XM_027288602.1	gene-LOC104936357	LOC104936357	arf-GAP with coiled-coil, ANK repeat and PH domain-containing protein 3, transcript variant X2	0.01	0.0489939	down	0.4	0.22	0	0	0	0	0.206667	0
rna-XM_027276868.1	gene-LOC104939709	LOC104939709	serine/threonine-protein kinase ppk4, transcript variant X2	0.008	0.0490411	down	0.18	0.63	0	0	0	0	0.27	0
rna-XM_019256607.2	gene-rnf144b	rnf144b	ring finger protein 144B, transcript variant X3	0.011	0.0493158	down	0.51	0.37	0	0	0	0	0.293333	0
rna-XM_019275806.2	gene-myo9a	myo9a	myosin IXA, transcript variant X2	0.011	0.0493326	down	0.1	0	0.1	0	0	0	0.0666667	0
rna-XM_027279885.1	gene-LOC104930501	LOC104930501	RNA-binding protein 5, transcript variant X3	0.011	0.0493512	down	0.41	0.3	0	0	0	0	0.236667	0
rna-XM_027279531.1	gene-LOC104931283	LOC104931283	electroneutral sodium bicarbonate exchanger 1, transcript variant X1	0.014	0.0493925	down	0.52	0	0	0	0	0	0.173333	0
rna-XM_019273119.2	gene-LOC104928990	LOC104928990	guanine nucleotide-binding protein G(I)/G(S)/G(O) subunit gamma-13, transcript variant X2	0.01	0.0494294	down	0.19	0.35	0	0	0	0	0.18	0
rna-XM_010740827.3	gene-taok2	taok2	TAO kinase 2, transcript variant X4	0.009	0.0494609	down	0	0.25	0.08	0	0	0	0.11	0
rna-XM_019260234.2	gene-LOC104938605	LOC104938605	E3 ubiquitin-protein ligase RNF180, transcript variant X4	0.012	0.0495519	down	0	0.54	0.45	0	0	0	0.33	0
rna-XM_027285137.1	gene-LOC104929637	LOC104929637	receptor-type tyrosine-protein phosphatase S-like, transcript variant X4	0.01	0.0497475	down	0.09	0.18	0	0	0	0	0.09	0
rna-XM_010752013.3	gene-cnot1	cnot1	CCR4-NOT transcription complex subunit 1, transcript variant X6	0.563	0.0499647	down	1.92	1.94	0.96	0.66	1.17	0.95	1.60667	0.926667
rna-XM_027286505.1	gene-yars	yars	tyrosyl-tRNA synthetase, transcript variant X2	0.527	0.0499924	down	5.13	3.29	5.73	3.5	2.57	1.5	4.71667	2.52333
