# Supplementary material for: Comparative Transcriptomics Reveals the microRNA-Mediated Immune Response of Large Yellow Croaker (Larimichthys crocea) to Pseudomonas plecoglossicida Infection
Source: MDPI journal article supplement (doi:10.3390/fishes8010010), 2022-12-23
Supplement: s1 [file s1 › Table S8.xlsx]

## Sheet: Table S8
Table S8 Overview information of DEmRNA at 24 h
Transcript_ID	Gene_ID	Gene name	Gene description	FC(PP2/PBS2)	P value	Regulation	PBS2_1	PBS2_2	PBS2_3	PP2_1	PP2_2	PP2_3	PBS2	PP2
rna-XM_027273517.1	gene-nup98	nup98	nucleoporin 98, transcript variant X8	879.655	3.00885e-06	up	0	0	0	0.79	0.7	1.1	0	0.863333
rna-XM_027285304.1	gene-LOC104932606	LOC104932606	integrin alpha-6, transcript variant X2	835.551	1.56923e-05	up	0	0	0	1.02	1.69	3.09	0	1.93333
rna-XM_019275087.2	gene-LOC104928538	LOC104928538	sorting nexin-14, transcript variant X2	138.073	7.3441e-05	up	0	0.07	0.02	3.41	4.03	4.63	0.03	4.02333
rna-XM_019255212.2	gene-LOC104931049	LOC104931049	collagen alpha-1(XXVIII) chain, transcript variant X1	246.981	7.74571e-05	up	0	0	0	0.56	0.68	0.65	0	0.63
rna-XM_010733346.3	gene-wls	wls	Wnt ligand secretion mediator, transcript variant X2	177.663	0.000181193	up	0	0	0.08	8.53	5.62	3.1	0.0266667	5.75
rna-XM_027283353.1	gene-rexo5	rexo5	RNA exonuclease 5, transcript variant X2	250.636	0.000214438	up	0	0	0	0.46	0.99	0.66	0	0.703333
rna-XM_027283575.1	gene-LOC104937884	LOC104937884	zinc finger protein 638-like, transcript variant X3	3.767	0.000493998	up	0.37	0.47	0.44	1.45	1.4	1.98	0.426667	1.61
rna-XM_027290321.1	gene-LOC104918505	LOC104918505	transducin-like enhancer protein 4, transcript variant X3	468.469	0.000497631	up	0	0	0	0.75	0.63	0.49	0	0.623333
rna-XM_019267025.2	gene-LOC109140361	LOC109140361	protein FAM122A, transcript variant X2	1.665	0.000612427	up	1.94	1.99	1.84	3.2	3.07	3.35	1.92333	3.20667
rna-XM_027285415.1	gene-LOC109142533	LOC109142533	leucine-rich repeat flightless-interacting protein 2, transcript variant X9	382.636	0.000798904	up	0	0	0	0.61	0.43	0.44	0	0.493333
rna-XM_010751003.3	gene-fam177a1	fam177a1	family with sequence similarity 177 member A1	3.389	0.000996608	up	2.66	3.55	2.45	14.29	7.96	7.34	2.88667	9.86333
rna-XM_010741702.3	gene-LOC104927589	LOC104927589	solute carrier family 12 member 7, transcript variant X2	462.646	0.00112244	up	0	0	0	0.23	0.78	0.5	0	0.503333
rna-XM_019270238.2	gene-lingo3	lingo3	leucine rich repeat and Ig domain containing 3, transcript variant X2	514.162	0.00135178	up	0	0	0	0.21	0.65	0.9	0	0.586667
rna-XM_027278712.1	gene-LOC104937876	LOC104937876	A-kinase anchor protein 13-like, transcript variant X5	283.537	0.00144733	up	0	0	0	0.17	0.18	0.15	0	0.166667
rna-XM_010746169.3	gene-LOC104931217	LOC104931217	RAC-gamma serine/threonine-protein kinase, transcript variant X1	283.198	0.00147177	up	0	0	0	0.44	0.41	0.49	0	0.446667
rna-XR_003462606.1	gene-dgkq	dgkq	diacylglycerol kinase theta, transcript variant X2	330.132	0.00147602	up	0	0	0	0.33	0.69	0.35	0	0.456667
rna-XM_019269580.2	gene-LOC104938557	LOC104938557	ubinuclein-2, transcript variant X1	872.357	0.00151224	up	0	0	0	0.86	0.44	2.73	0	1.34333
rna-XM_019276060.2	gene-LOC109142397	LOC109142397	hypothetical protein, transcript variant X1	284.412	0.00152807	up	0	0	0	0.37	0.29	0.41	0	0.356667
rna-XM_010744959.3	gene-LOC104930231	LOC104930231	sesquipedalian-1, transcript variant X2	267.364	0.00170379	up	0	0	0	1.08	1.05	0.78	0	0.97
rna-XM_010734075.3	gene-LOC104921522	LOC104921522	argonaute RISC catalytic component 4, transcript variant X4	1.882	0.00179873	up	1.99	2.29	2.33	3.4	4.02	5.03	2.20333	4.15
rna-XM_010735437.3	gene-LOC104922577	LOC104922577	hypothetical protein, transcript variant X5	279.95	0.0018147	up	0	0	0	0.57	0.67	1.06	0	0.766667
rna-XM_027286694.1	gene-diaph1	diaph1	diaphanous related formin 1, transcript variant X2	320.193	0.00188532	up	0	0	0	0.21	0.26	0.54	0	0.336667
rna-XM_027284904.1	gene-caskin1	caskin1	CASK interacting protein 1, transcript variant X5	331.587	0.00224713	up	0	0	0	0.12	0.41	0.16	0	0.23
rna-XM_027281512.1	gene-usp8	usp8	ubiquitin specific peptidase 8, transcript variant X2	437.445	0.00230456	up	0	0	0	0.27	1.3	0.37	0	0.646667
rna-XM_019278655.2	gene-LOC104936934	LOC104936934	ras-specific guanine nucleotide-releasing factor 2, transcript variant X2	532.821	0.00232862	up	0	0	0	1.34	0.43	0.2	0	0.656667
rna-XM_019269800.2	gene-chtf18	chtf18	chromosome transmission fidelity factor 18, transcript variant X4	322.261	0.00235332	up	0	0	0	0.35	0.59	1.26	0	0.733333
rna-XR_002042962.2	gene-LOC104937829	LOC104937829	syndecan-2, transcript variant X2	3.746	0.00241097	up	2.51	4.57	6.64	23.92	15.83	11.87	4.57333	17.2067
rna-XM_027289312.1	gene-dnmbp	dnmbp	dynamin binding protein, transcript variant X3	416.839	0.00241886	up	0	0	0	0.93	0.2	0.25	0	0.46
rna-XM_019258739.2	gene-LOC104930614	LOC104930614	annexin A11, transcript variant X1	230.53	0.00252059	up	0	0	0	0.89	0.79	0.49	0	0.723333
rna-XM_010737973.3	gene-LOC104924582	LOC104924582	spindle and kinetochore-associated protein 2	1.672	0.0025419	up	5.39	5.08	6.77	9.28	9.49	10.21	5.74667	9.66
rna-XM_010733313.3	gene-pgam5	pgam5	PGAM family member 5, mitochondrial serine/threonine protein phosphatase, transcript variant X1	217.776	0.00258129	up	0	0	0.02	5.43	0.17	2.35	0.00666667	2.65
rna-XM_027275275.1	gene-fndc3b	fndc3b	fibronectin type III domain containing 3B, transcript variant X2	230.633	0.00276159	up	0	0	0	0.41	0.49	0.22	0	0.373333
rna-XM_019278536.2	gene-LOC104926638	LOC104926638	muscleblind-like protein 2a, transcript variant X6	205.133	0.00294159	up	0	0	0	0.27	0.19	0.28	0	0.246667
rna-XM_010746435.3	gene-LOC104931433	LOC104931433	ras-related protein Rab-8A	2.727	0.00297475	up	3.57	6.29	2.93	8.88	13.07	12.97	4.26333	11.64
rna-XM_027278081.1	gene-LOC104933467	LOC104933467	serine/threonine-protein kinase ULK1, transcript variant X4	193.339	0.00309597	up	0	0	0	0.33	0.38	0.4	0	0.37
rna-XM_019277186.2	gene-pgghg	pgghg	protein-glucosylgalactosylhydroxylysine glucosidase, transcript variant X6	543.859	0.00311153	up	0	0	0	0.48	0.48	2.74	0	1.23333
rna-XM_019263245.2	gene-znf410	znf410	zinc finger protein 410, transcript variant X4	1.869	0.00323207	up	3.42	3.67	5.02	6.85	7.86	8.04	4.03667	7.58333
rna-XM_027281176.1	gene-grk3	grk3	G protein-coupled receptor kinase 3, transcript variant X1	276.021	0.00358875	up	0	0	0	0.49	0.15	0.12	0	0.253333
rna-XM_027277231.1	gene-tmcc1	tmcc1	transmembrane and coiled-coil domain family 1, transcript variant X4	183.354	0.00367655	up	0	0	0	0.23	0.26	0.37	0	0.286667
rna-XM_019275544.2	gene-sema4d	sema4d	semaphorin 4D, transcript variant X2	185.973	0.00384245	up	0	0	0	0.29	0.26	0.49	0	0.346667
rna-XM_027284910.1	gene-LOC104919485	LOC104919485	phosphoribosyl pyrophosphate synthase-associated protein 2, transcript variant X2	1.98	0.00403774	up	3.95	3.81	4.17	9.26	9.03	5.53	3.97667	7.94
rna-XM_019276081.2	gene-LOC104919658	LOC104919658	uncharacterized LOC104919658, transcript variant X5	1.819	0.00409983	up	1.61	1.45	1.03	2.41	2.86	2.22	1.36333	2.49667
rna-XM_010737408.3	gene-LOC104924140	LOC104924140	putative monooxygenase p33MONOX, transcript variant X2	2.896	0.00433991	up	0.78	1.36	1.02	2.68	4.1	2.41	1.05333	3.06333
rna-XM_027288710.1	gene-LOC113747745	LOC113747745	cyclin-dependent kinase 11B-like, transcript variant X7	192.189	0.00437776	up	0	0	0	0.65	0.82	0.27	0	0.58
rna-XM_027286678.1	gene-LOC104930573	LOC104930573	uncharacterized LOC104930573, transcript variant X2	1.527	0.004497	up	151.1	119.71	146.3	216.28	239.46	186.09	139.037	213.943
rna-XM_027277356.1	gene-LOC104940100	LOC104940100	AP-3 complex subunit mu-1, transcript variant X2	3.286	0.0045392	up	1.4	0.74	0.98	2.39	4.5	3.48	1.04	3.45667
rna-XM_019269809.2	gene-LOC104939052	LOC104939052	C-Jun-amino-terminal kinase-interacting protein 4-like, transcript variant X7	191.441	0.00455022	up	0	0	0	0.33	0.11	0.19	0	0.21
rna-XM_027279849.1	gene-dram2	dram2	DNA damage regulated autophagy modulator 2	3.921	0.00464644	up	0.77	0.99	1.14	3.43	5.98	2.1	0.966667	3.83667
rna-XM_027290372.1	gene-hps3	hps3	HPS3, biogenesis of lysosomal organelles complex 2 subunit 1, transcript variant X5	184.722	0.00466914	up	0	0	0	0.55	0.37	0.18	0	0.366667
rna-XM_019275366.2	gene-tp63	tp63	tumor protein p63, transcript variant X4	216.641	0.00470125	up	0	0	0	0.17	0.74	0.54	0	0.483333
rna-XM_027282711.1	gene-LOC109138790	LOC109138790	butyrophilin subfamily 1 member A1-like, transcript variant X3	211.001	0.00477597	up	0	0	0	1.7	0.4	0.93	0	1.01
rna-XM_027276272.1	gene-itga2b	itga2b	integrin subunit alpha 2b, transcript variant X2	1682.62	0.00495167	up	0	0	0	8.75	0.57	1.08	0	3.46667
rna-XM_027286760.1	gene-LOC104927562	LOC104927562	serine/arginine repetitive matrix protein 1	1.684	0.00498613	up	4.11	4.18	4.28	6.52	6.83	7.93	4.19	7.09333
rna-XM_027284761.1	gene-clec16a	clec16a	C-type lectin domain containing 16A, transcript variant X4	45.058	0.00513014	up	0	0	0.1	1.44	1.74	1.38	0.0333333	1.52
rna-XM_027284629.1	gene-afdn	afdn	afadin, adherens junction formation factor, transcript variant X9	233.873	0.00530113	up	0	0	0	0.38	0.06	0.22	0	0.22
rna-XM_027291792.1	gene-ndfip2	ndfip2	Nedd4 family interacting protein 2	1679.23	0.00537721	up	0	0	0	0	5.44	4.33	0	3.25667
rna-XM_027283335.1	gene-gab1	gab1	GRB2 associated binding protein 1, transcript variant X4	136.014	0.00554467	up	0	0	0	0.27	0.25	0.2	0	0.24
rna-XM_019277870.2	gene-asxl2	asxl2	ASXL transcriptional regulator 2, transcript variant X3	2332.03	0.00560584	up	0	0	0	3.18	5.3	0	0	2.82667
rna-XM_010745777.3	gene-arrdc1	arrdc1	arrestin domain containing 1, transcript variant X1	2.423	0.00567462	up	5.85	11.89	5	17.81	18.81	18.48	7.58	18.3667
rna-XM_019274595.2	gene-ipo8	ipo8	importin 8, transcript variant X2	328.086	0.0058221	up	0	0	0	0.74	0.98	0	0	0.573333
rna-XM_019267191.2	gene-themis2	themis2	thymocyte selection associated family member 2, transcript variant X4	2.539	0.00584332	up	2.31	1.97	3.65	4.52	7.09	8.58	2.64333	6.73
rna-XM_027283992.1	gene-LOC104921993	LOC104921993	testis development-related protein, transcript variant X2	225.176	0.00594172	up	0	0	0	0.2	0.89	1.31	0	0.8
rna-XM_027273382.1	gene-alcam	alcam	activated leukocyte cell adhesion molecule, transcript variant X3	153.629	0.00606146	up	0	0	0	0.22	0.45	0.17	0	0.28
rna-XM_027272679.1	gene-LOC104921019	LOC104921019	ankyrin repeat domain-containing protein 26, transcript variant X7	181.807	0.0061626	up	0	0	0	0.09	0.3	0.08	0	0.156667
rna-XM_027272676.1	gene-LOC104921019	LOC104921019	ankyrin repeat domain-containing protein 26, transcript variant X4	141.34	0.00630004	up	0	0	0	0.11	0.08	0.18	0	0.123333
rna-XM_019267224.2	gene-mtf1	mtf1	metal regulatory transcription factor 1, transcript variant X2	152.313	0.00632146	up	0	0	0	0.08	0.24	0.21	0	0.176667
rna-XM_019253163.2	gene-LOC104939427	LOC104939427	polyhomeotic-like protein 1, transcript variant X4	121.572	0.00645069	up	0	0	0	0.19	0.15	0.15	0	0.163333
rna-XM_027275610.1	gene-LOC104937449	LOC104937449	polymeric immunoglobulin receptor-like, transcript variant X7	117.935	0.00667607	up	0	0	0	0.3	0.28	0.24	0	0.273333
rna-XM_019278202.2	gene-snapc4	snapc4	small nuclear RNA activating complex polypeptide 4, transcript variant X2	2.332	0.00694841	up	3.64	1.58	2.18	6.55	5.8	5.08	2.46667	5.81
rna-XM_027280511.1	gene-tbc1d2	tbc1d2	TBC1 domain family member 2, transcript variant X2	148.062	0.00695361	up	0	0	0	0.1	0.16	0.33	0	0.196667
rna-XM_027291489.1	gene-map4k4	map4k4	mitogen-activated protein kinase kinase kinase kinase 4, transcript variant X7	51.644	0.00711311	up	0	0.02	0	0.2	0.57	0.64	0.00666667	0.47
rna-XM_010744686.3	gene-LOC104930021	LOC104930021	actin-related protein 2-A, transcript variant X1	2.398	0.00727489	up	1.12	1.05	1.96	3.48	3.57	2.93	1.37667	3.32667
rna-XM_010730673.3	gene-LOC104918813	LOC104918813	testis-expressed protein 2, transcript variant X2	4.116	0.00727603	up	0.3	0.16	0.14	1.08	0.53	0.9	0.2	0.836667
rna-XM_027287660.1	gene-LOC109137074	LOC109137074	type-2 ice-structuring protein-like, transcript variant X1	3.471	0.00754861	up	21.02	12.3	20.58	110.81	35.99	44.1	17.9667	63.6333
rna-XM_027279376.1	gene-LOC104921075	LOC104921075	calponin homology domain-containing protein DDB_G0272472, transcript variant X2	411.27	0.00756151	up	0	0	0	0	1.11	0.81	0	0.64
rna-XM_027284580.1	gene-pgm3	pgm3	phosphoglucomutase 3, transcript variant X2	1.716	0.0076942	up	2.36	3.31	2.97	5.52	5.3	4.09	2.88	4.97
rna-XR_003463171.1	gene-LOC104926134	LOC104926134	dihydropyrimidinase-related protein 5, transcript variant X1	437.189	0.00772914	up	0	0	0	0.8	0.56	0	0	0.453333
rna-XM_027286309.1	gene-LOC104922067	LOC104922067	engulfment and cell motility protein 1, transcript variant X4	1.513	0.00783948	up	28.9	29.4	23.71	38.03	50.47	36.27	27.3367	41.59
rna-XM_019275231.2	gene-ckap4	ckap4	cytoskeleton associated protein 4, transcript variant X2	31.156	0.00784747	up	0.37	0	0.08	2.41	10.11	2.28	0.15	4.93333
rna-XM_027275841.1	gene-ascc2	ascc2	activating signal cointegrator 1 complex subunit 2, transcript variant X2	44.607	0.00791472	up	0	0.3	0	2.38	7.7	3.65	0.1	4.57667
rna-XM_019277120.2	gene-LOC104922135	LOC104922135	disintegrin and metalloproteinase domain-containing protein 17, transcript variant X1	110.615	0.00792504	up	0	0	0	0.27	0.18	0.14	0	0.196667
rna-XM_027284292.1	gene-cenpe	cenpe	centromere protein E	2.052	0.00797291	up	0.55	0.94	0.74	1.85	1.28	1.45	0.743333	1.52667
rna-XM_010751300.3	gene-cenpt	cenpt	centromere protein T, transcript variant X1	153.815	0.00801687	up	0	0	0	0.12	0.33	0.59	0	0.346667
rna-XM_019261626.2	gene-trappc5	trappc5	trafficking protein particle complex 5, transcript variant X3	145.524	0.00812607	up	0	0	0	0.28	0.85	1.23	0	0.786667
rna-XM_027276616.1	gene-tsc22d4	tsc22d4	TSC22 domain family member 4, transcript variant X3	100.709	0.00818407	up	0	0	0	0.44	0.47	0.49	0	0.466667
rna-XM_010748429.3	gene-LOC104933066	LOC104933066	mothers against decapentaplegic homolog 4, transcript variant X2	2.624	0.00822617	up	0.28	0.28	0.21	0.63	0.71	0.68	0.256667	0.673333
rna-XM_019278930.2	gene-brd1	brd1	bromodomain containing 1, transcript variant X1	2.14	0.00824916	up	0.59	0.89	0.58	1.62	1.42	1.38	0.686667	1.47333
rna-XM_010732437.3	gene-sema6d	sema6d	semaphorin 6D, transcript variant X2	101.651	0.00834781	up	0	0	0	0.09	0.11	0.13	0	0.11
rna-XM_010755000.3	gene-nr2c2	nr2c2	nuclear receptor subfamily 2 group C member 2, transcript variant X2	2.21	0.00842033	up	1.03	0.71	1.2	2.62	1.78	2.14	0.98	2.18
rna-XM_027280748.1	gene-rapgef2	rapgef2	Rap guanine nucleotide exchange factor 2, transcript variant X2	108.498	0.0084475	up	0	0	0	0.06	0.13	0.08	0	0.09
rna-XM_019272273.2	gene-tox2	tox2	TOX high mobility group box family member 2, transcript variant X6	2.659	0.00858893	up	0.71	0.73	0.5	2.25	1.7	1.24	0.646667	1.73
rna-XM_019255286.2	gene-npnt	npnt	nephronectin, transcript variant X3	100.596	0.00858908	up	0	0	0	0.27	0.32	0.2	0	0.263333
rna-XM_027291188.1	gene-LOC104939722	LOC104939722	uncharacterized LOC104939722	3.931	0.00858911	up	0.39	0.29	0.25	1.38	1.46	0.85	0.31	1.23
rna-XM_010733473.3	gene-LOC104921040	LOC104921040	long-chain-fatty-acid--CoA ligase 6, transcript variant X2	44.181	0.00875284	up	0.02	0	0	0.51	0.26	0.39	0.00666667	0.386667
rna-XM_027281784.1	gene-myo18b	myo18b	myosin XVIIIB, transcript variant X2	99.353	0.00888036	up	0	0	0	0.08	0.1	0.13	0	0.103333
rna-XR_002041639.2	gene-cd302	cd302	CD302 molecule, transcript variant X2	2.018	0.00936367	up	3.84	4.77	2.65	6.09	9.2	7.57	3.75333	7.62
rna-XM_027273512.1	gene-nup98	nup98	nucleoporin 98, transcript variant X3	1.526	0.00958451	up	2.01	1.86	2.44	3.31	3.61	2.75	2.10333	3.22333
rna-XM_019261307.2	gene-gale	gale	UDP-galactose-4-epimerase, transcript variant X2	1.802	0.00963089	up	4.34	3.73	3.95	6.43	7.02	8.39	4.00667	7.28
rna-XM_027278191.1	gene-taok3	taok3	TAO kinase 3, transcript variant X4	89.226	0.00965793	up	0	0	0	0.23	0.17	0.22	0	0.206667
rna-XM_010749063.3	gene-LOC104933570	LOC104933570	septin-7, transcript variant X2	368.232	0.00966229	up	0	0.04	0	0	5.25	10.28	0.0133333	5.17667
rna-XM_027276499.1	gene-LOC104928201	LOC104928201	disks large-associated protein 1, transcript variant X2	104.148	0.00967579	up	0	0	0	0.11	0.04	0.05	0	0.0666667
rna-XM_019257329.2	gene-ptpn21	ptpn21	protein tyrosine phosphatase, non-receptor type 21, transcript variant X2	92.272	0.00973632	up	0	0	0	0.08	0.14	0.11	0	0.11
rna-XM_027286077.1	gene-nsmce2	nsmce2	NSE2 (MMS21) homolog, SMC5-SMC6 complex SUMO ligase, transcript variant X3	112.323	0.00975449	up	0	0	0	0.58	1.77	0.7	0	1.01667
rna-XM_019270331.2	gene-LOC109141109	LOC109141109	rho-related GTP-binding protein RhoG-like, transcript variant X1	87.775	0.00992499	up	0	0	0	0.48	0.61	0.7	0	0.596667
rna-XM_027279255.1	gene-LOC113744035	LOC113744035	uncharacterized LOC113744035, transcript variant X3	2.179	0.0101446	up	2.41	2.32	2.78	7.86	4.93	3.74	2.50333	5.51
rna-XM_019265768.2	gene-znf346	znf346	zinc finger protein 346, transcript variant X3	1.693	0.0103081	up	1.04	1.03	1.11	1.93	1.64	1.83	1.06	1.8
rna-XM_019261940.2	gene-kdm8	kdm8	lysine demethylase 8, transcript variant X1	83.63	0.0104116	up	0	0	0	0.18	0.25	0.22	0	0.216667
rna-XM_027283158.1	gene-LOC104926858	LOC104926858	protein NLRC3, transcript variant X3	201.714	0.0104167	up	0	0	0	0.16	0.56	0.05	0	0.256667
rna-XM_010739173.3	gene-macrod1	macrod1	MACRO domain containing 1, transcript variant X2	97.829	0.010491	up	0	0	0	0.43	0.61	0.21	0	0.416667
rna-XM_027288237.1	gene-slc39a6	slc39a6	solute carrier family 39 member 6, transcript variant X1	2.476	0.0105135	up	1.75	1.13	0.71	2.67	3.78	2.53	1.19667	2.99333
rna-XM_027280935.1	gene-LOC104939912	LOC104939912	von Willebrand factor A domain-containing protein 5A-like, transcript variant X2	162.838	0.0105233	up	0	0	0	0.5	0.54	0.06	0	0.366667
rna-XM_019257844.2	gene-zfc3h1	zfc3h1	zinc finger C3H1-type containing	2.37	0.0106366	up	2.45	1.93	1.08	3.02	5.28	4.69	1.82	4.33
rna-XM_027279219.1	gene-arhgap9	arhgap9	Rho GTPase activating protein 9, transcript variant X4	2.473	0.0106804	up	0.47	0.61	0.61	1.74	1.06	1.41	0.563333	1.40333
rna-XM_027273886.1	gene-fdxacb1	fdxacb1	ferredoxin-fold anticodon binding domain containing 1, transcript variant X1	295.976	0.010754	up	0	0	0	0	0.51	2.28	0	0.93
rna-XM_027286423.1	gene-ccdc127	ccdc127	coiled-coil domain containing 127, transcript variant X3	42.769	0.0112573	up	0	0	0.09	0.48	1.66	2.09	0.03	1.41
rna-XM_019279586.2	gene-LOC104924089	LOC104924089	Krueppel-like factor 8, transcript variant X2	1.593	0.011383	up	1.17	1.32	1.38	1.73	1.97	2.47	1.29	2.05667
rna-XM_027284486.1	gene-LOC104922426	LOC104922426	transforming growth factor beta-3 proprotein, transcript variant X2	30.038	0.0115913	up	0	0	0	0.09	0.08	0.18	0	0.116667
rna-XM_019279024.2	gene-epb41l2	epb41l2	erythrocyte membrane protein band 4.1 like 2, transcript variant X5	136.161	0.0117883	up	0	0	0	0.23	0.19	0.03	0	0.15
rna-XM_019263449.2	gene-c2cd2	c2cd2	C2 calcium dependent domain containing 2, transcript variant X1	1.906	0.0119639	up	1.48	1.04	1.71	2.83	2.42	2.85	1.41	2.7
rna-XM_027280554.1	gene-agfg1	agfg1	ArfGAP with FG repeats 1, transcript variant X1	91.176	0.0121667	up	0	0	0	0.42	0.15	0.15	0	0.24
rna-XM_019267822.2	gene-nccrp1	nccrp1	non-specific cytotoxic cell receptor protein 1 homolog (zebrafish)	1.506	0.0125147	up	272.38	338.97	222.96	434.76	372.52	464.94	278.103	424.073
rna-XM_019279317.2	gene-LOC104938074	LOC104938074	zinc finger E-box-binding homeobox 2-like, transcript variant X2	1.503	0.0125871	up	2.21	1.99	2.56	3.05	3.71	3.44	2.25333	3.4
rna-XM_019275164.2	gene-LOC104924797	LOC104924797	pleckstrin homology domain-containing family G member 3, transcript variant X3	89.42	0.0126245	up	0	0	0	0.22	0.09	0.07	0	0.126667
rna-XR_003462269.1	gene-LOC113745631	LOC113745631	uncharacterized LOC113745631	107.982	0.0128006	up	0	0	0	0.75	0.3	1.67	0	0.906667
rna-XM_027273675.1	gene-LOC104934254	LOC104934254	neuronal PAS domain-containing protein 2, transcript variant X7	438.998	0.013081	up	0	0	0	0.01	0.93	0.47	0	0.47
rna-XM_027285075.1	gene-LOC104929914	LOC104929914	cytosolic phospholipase A2 gamma	52.037	0.0130983	up	0	0.03	0	0.19	0.34	1.57	0.01	0.7
rna-XM_019265256.2	gene-dock7	dock7	dedicator of cytokinesis 7, transcript variant X4	189.761	0.0131175	up	0	0	0	0.33	0.02	0.18	0	0.176667
rna-XM_010729267.3	gene-atp6v1h	atp6v1h	ATPase H+ transporting V1 subunit H, transcript variant X2	74.362	0.0135984	up	0	0	0	0.48	0.23	0.21	0	0.306667
rna-XM_010748615.3	gene-LOC104933223	LOC104933223	solute carrier family 45 member 3, transcript variant X4	3.534	0.0136318	up	0.28	0.3	0.48	1.84	1.3	0.65	0.353333	1.26333
rna-XM_010735707.3	gene-cd151	cd151	CD151 molecule (Raph blood group), transcript variant X1	1.666	0.01366	up	3.04	4.86	4.85	6.94	6.52	7.82	4.25	7.09333
rna-XM_027278347.1	gene-LOC104930980	LOC104930980	polymeric immunoglobulin receptor, transcript variant X5	2.239	0.0137306	up	2.41	4.58	2.45	7.55	7.83	5.93	3.14667	7.10333
rna-XM_019262406.2	gene-LOC109139287	LOC109139287	uncharacterized LOC109139287, transcript variant X2	78.103	0.0138542	up	0	0	0	0.18	0.14	0.4	0	0.24
rna-XM_019264785.2	gene-dnmbp	dnmbp	dynamin binding protein, transcript variant X4	175.2	0.0138965	up	0	0	0	0	0.62	0.16	0	0.26
rna-XM_019265774.2	gene-nsd1	nsd1	nuclear receptor binding SET domain protein 1, transcript variant X2	1.553	0.0142493	up	1.79	2.68	2.27	4.25	3.25	3	2.24667	3.5
rna-NM_001303340.1	gene-alpl	alpl	alkaline phosphatase, biomineralization associated	1.654	0.0142985	up	62.94	73.84	39.93	102.16	101.77	89.98	58.9033	97.97
rna-XM_019275362.2	gene-nme7	nme7	NME/NM23 family member 7, transcript variant X1	65.9	0.0143433	up	0	0	0	0.46	0.23	0.32	0	0.336667
rna-XM_019261148.2	gene-LOC104918330	LOC104918330	transcription factor MafG, transcript variant X6	70.888	0.0143825	up	0	0	0	0.12	0.12	0.05	0	0.0966667
rna-XM_027289784.1	gene-LOC104929212	LOC104929212	ATP-dependent RNA helicase DHX8	1.671	0.0148251	up	4.02	4.38	5.8	6	8.24	9.53	4.73333	7.92333
rna-XM_010737435.3	gene-trip12	trip12	thyroid hormone receptor interactor 12, transcript variant X10	2.002	0.0151183	up	1.02	0.7	0.78	1.84	2.07	1.16	0.833333	1.69
rna-XM_027284321.1	gene-LOC109137671	LOC109137671	uncharacterized LOC109137671	62.324	0.0153283	up	0	0	0	0.56	0.65	0.32	0	0.51
rna-XM_010736951.3	gene-nrarp	nrarp	NOTCH regulated ankyrin repeat protein, transcript variant X2	91.926	0.0153784	up	0	0.01	0	2.22	0.08	0.11	0.00333333	0.803333
rna-XM_019257417.2	gene-abi3bp	abi3bp	ABI family member 3 binding protein, transcript variant X4	73.304	0.0155366	up	0	0	0	0.22	0.06	0.16	0	0.146667
rna-XM_027286759.1	gene-galnt1	galnt1	polypeptide N-acetylgalactosaminyltransferase 1, transcript variant X3	3.221	0.0155957	up	2.21	0.54	1.13	4.37	5.05	3.24	1.29333	4.22
rna-XM_019262726.2	gene-metap1	metap1	methionyl aminopeptidase 1	5.326	0.0156992	up	1.75	0.31	0.65	2.54	3.99	8.02	0.903333	4.85
rna-XM_019269698.2	gene-siah1	siah1	siah E3 ubiquitin protein ligase 1, transcript variant X3	56.891	0.016035	up	0	0	0	0.13	0.1	0.16	0	0.13
rna-XM_027291593.1	gene-LOC104931488	LOC104931488	zinc finger protein 513-like, transcript variant X2	2.305	0.0160595	up	1.74	2.03	4.28	6.41	6.29	5.99	2.68333	6.23
rna-XM_019277992.2	gene-numb	numb	NUMB, endocytic adaptor protein, transcript variant X5	154.047	0.016475	up	0.01	0	0	0	0.56	1.54	0.00333333	0.7
rna-XM_027284361.1	gene-LOC104939981	LOC104939981	coiled-coil domain-containing protein 180, transcript variant X1	56.619	0.0168021	up	0	0	0	0.07	0.12	0.08	0	0.09
rna-XM_027286249.1	gene-rarb	rarb	retinoic acid receptor beta, transcript variant X2	25.709	0.0169788	up	0	0	0	0.18	0.05	0.12	0	0.116667
rna-XM_019267187.2	gene-arhgef1	arhgef1	Rho guanine nucleotide exchange factor 1, transcript variant X3	1.876	0.0170412	up	3.81	3.04	2.4	6.51	7.24	3.73	3.08333	5.82667
rna-XM_019270690.2	gene-LOC104923075	LOC104923075	RLA class II histocompatibility antigen, DP alpha-1 chain-like, transcript variant X2	118.456	0.0171339	up	0	0	0	1.36	0.55	0	0	0.636667
rna-XM_019259896.2	gene-LOC104919295	LOC104919295	serine/threonine-protein kinase D3, transcript variant X2	4.068	0.0171696	up	0.18	0.17	0.33	0.49	0.69	1.63	0.226667	0.936667
rna-XM_019268020.2	gene-LOC104923885	LOC104923885	neurexin-1a, transcript variant X10	52.37	0.017531	up	0	0	0	0.05	0.08	0.07	0	0.0666667
rna-XM_019272197.2	gene-LOC104931955	LOC104931955	rho guanine nucleotide exchange factor 25, transcript variant X4	3.107	0.0175751	up	0.77	0.28	0.74	1.87	2.32	1.42	0.596667	1.87
rna-XM_010731417.3	gene-ccna2	ccna2	cyclin A2, transcript variant X1	1.58	0.0176889	up	3.75	5.42	5.38	6.55	8.28	8.24	4.85	7.69
rna-XM_019261134.2	gene-LOC104932118	LOC104932118	inositol hexakisphosphate and diphosphoinositol-pentakisphosphate kinase 2, transcript variant X2	2.277	0.0177006	up	0.4	0.29	0.45	0.66	0.97	0.98	0.38	0.87
rna-XM_027279041.1	gene-cast	cast	calpastatin, transcript variant X7	59.622	0.0177825	up	0	0	0	0.11	0.13	0.04	0	0.0933333
rna-XM_027289242.1	gene-LOC109138259	LOC109138259	integrin alpha-M-like, transcript variant X3	1.644	0.0178891	up	2.6	3.6	2.46	3.72	5.64	4.91	2.88667	4.75667
rna-XM_019258991.2	gene-mtf2	mtf2	metal response element binding transcription factor 2, transcript variant X2	63.826	0.0179676	up	0	0	0	0.22	0.09	0.07	0	0.126667
rna-XM_027274711.1	gene-inf2	inf2	inverted formin, FH2 and WH2 domain containing, transcript variant X1	20.666	0.0183947	up	0.1	0	2.45	18.47	20.54	14.18	0.85	17.73
rna-XM_027286538.1	gene-macf1	macf1	microtubule-actin crosslinking factor 1, transcript variant X20	2.383	0.018401	up	0.1	0.11	0.16	0.29	0.39	0.17	0.123333	0.283333
rna-XM_027277288.1	gene-LOC104930903	LOC104930903	uncharacterized LOC104930903, transcript variant X2	2.644	0.0184291	up	0.46	0.42	0.32	1.04	0.86	1.32	0.4	1.07333
rna-XM_027282407.1	gene-primpol	primpol	primase and DNA directed polymerase, transcript variant X4	79.337	0.0185472	up	0	0	0	0.51	0.61	0	0	0.373333
rna-XM_027281570.1	gene-ganab	ganab	glucosidase II alpha subunit, transcript variant X1	1.682	0.0186066	up	1.27	1.51	1.96	2.46	2.49	3.04	1.58	2.66333
rna-XM_010743926.3	gene-tp53i3	tp53i3	tumor protein p53 inducible protein 3, transcript variant X1	1.599	0.0187876	up	13.9	20.54	15.2	30.6	29.85	19.65	16.5467	26.7
rna-XM_019253917.2	gene-setdb1	setdb1	SET domain bifurcated 1, transcript variant X3	3.212	0.019206	up	0.59	0.56	0.18	1.65	1.07	1.6	0.443333	1.44
rna-XM_010750219.3	gene-fastkd2	fastkd2	FAST kinase domains 2	2.682	0.0194839	up	1.54	0.81	2.73	4.81	5.08	3.87	1.69333	4.58667
rna-XM_027287147.1	gene-ice1	ice1	interactor of little elongation complex ELL subunit 1, transcript variant X3	2.126	0.0198516	up	0.97	0.67	0.51	1.38	1.61	1.61	0.716667	1.53333
rna-XM_027278753.1	gene-sptbn5	sptbn5	spectrin beta, non-erythrocytic 5	2.127	0.0200614	up	0.37	0.31	0.33	0.49	0.59	1.07	0.336667	0.716667
rna-XM_010741396.3	gene-LOC104927340	LOC104927340	trypsin	45.205	0.0200625	up	0.14	0.22	0.85	1.89	0.92	53.06	0.403333	18.6233
rna-XM_027285924.1	gene-zc3h7a	zc3h7a	zinc finger CCCH-type containing 7A, transcript variant X1	79.134	0.0201346	up	0	0	0	0.23	0	0.35	0	0.193333
rna-XM_010745483.3	gene-LOC104930635	LOC104930635	neurotrimin, transcript variant X1	47.056	0.0202077	up	0	0	0	0.06	0.07	0.12	0	0.0833333
rna-XM_027290459.1	gene-LOC109136699	LOC109136699	tumor necrosis factor receptor superfamily member 5, transcript variant X1	3.374	0.020277	up	0.69	0.29	0.67	2.21	2.08	1.39	0.55	1.89333
rna-XM_010742150.3	gene-LOC104927956	LOC104927956	1-phosphatidylinositol 4,5-bisphosphate phosphodiesterase delta-1, transcript variant X2	47.196	0.0204569	up	0	0	0	0.15	0.13	0.07	0	0.116667
rna-XM_027287331.1	gene-LOC109142698	LOC109142698	C-type lectin domain family 10 member A	2.333	0.0204849	up	3.15	1.8	1.9	4.38	5.19	6.63	2.28333	5.4
rna-XM_027284023.1	gene-LOC104926785	LOC104926785	calpain-3, transcript variant X1	2.753	0.0207165	up	1.48	2.13	0.55	3.64	3.6	4.22	1.38667	3.82
rna-XM_010741678.3	gene-hdgf	hdgf	heparin binding growth factor	2.161	0.0207981	up	14.58	17.74	6.08	30.08	24.61	28.61	12.8	27.7667
rna-XM_010742228.3	gene-LOC104928019	LOC104928019	cAMP-dependent protein kinase type II-alpha regulatory subunit, transcript variant X1	1.545	0.0208067	up	8.63	7.42	8.18	10.13	11.2	16.22	8.07667	12.5167
rna-XM_019268476.2	gene-rmnd5b	rmnd5b	required for meiotic nuclear division 5 homolog B, transcript variant X2	2.562	0.0208256	up	4	2.37	6.18	5.99	13.82	12.54	4.18333	10.7833
rna-XM_019254564.2	gene-ablim1	ablim1	actin binding LIM protein 1, transcript variant X3	48.047	0.0213255	up	0	0	0	0.14	0.12	0.05	0	0.103333
rna-XM_019268055.2	gene-akap17a	akap17a	A-kinase anchoring protein 17A, transcript variant X1	1.674	0.0213774	up	1.77	1.54	2.04	3.24	2.84	2.95	1.78333	3.01
rna-XM_019263514.2	gene-sap30bp	sap30bp	SAP30 binding protein, transcript variant X1	1.738	0.0214277	up	2.72	4.26	4.4	6.89	6.38	6.62	3.79333	6.63
rna-XM_027290999.1	gene-gorasp2	gorasp2	golgi reassembly stacking protein 2, transcript variant X1	60.923	0.0214285	up	0	0	0	0.21	0.04	0.15	0	0.133333
rna-XM_010735267.3	gene-LOC104922441	LOC104922441	L-threonine 3-dehydrogenase, mitochondrial, transcript variant X2	1.79	0.0214394	up	28.52	44.88	29.89	62.22	82.58	41.28	34.43	62.0267
rna-XM_019258221.2	gene-znf276	znf276	zinc finger protein 276, transcript variant X3	107.698	0.0214515	up	0.02	0	0	1.97	1.22	0	0.00666667	1.06333
rna-XM_027276382.1	gene-LOC109137018	LOC109137018	interferon-inducible GTPase 5, transcript variant X3	27.751	0.0215975	up	0.57	0	0	3.89	9.97	2.74	0.19	5.53333
rna-XM_027276740.1	gene-LOC104934855	LOC104934855	microtubule-associated protein 9, transcript variant X3	69.674	0.0216097	up	0	0	0	0.06	0.16	0.44	0	0.22
rna-XM_019255779.2	gene-dcaf6	dcaf6	DDB1 and CUL4 associated factor 6, transcript variant X4	48.939	0.0217313	up	0	0	0	0.15	0.11	0.05	0	0.103333
rna-XM_019261235.2	gene-ddr1	ddr1	discoidin domain receptor tyrosine kinase 1, transcript variant X5	41.449	0.0218862	up	0	0	0	0.07	0.04	0.06	0	0.0566667
rna-XM_027287067.1	gene-LOC104932168	LOC104932168	membrane-spanning 4-domains subfamily A member 8, transcript variant X3	1.618	0.0221591	up	128.25	85.93	110.25	177.81	134.17	218.88	108.143	176.953
rna-XM_019260178.2	gene-pdcd11	pdcd11	programmed cell death 11, transcript variant X2	1.642	0.0221712	up	4.03	3.4	3.56	4.56	5.36	8.14	3.66333	6.02
rna-XM_010752213.3	gene-nacc2	nacc2	NACC family member 2, transcript variant X4	1.66	0.0221751	up	1.15	1.96	1.48	2.53	3.1	2	1.53	2.54333
rna-XM_027276386.1	gene-LOC113745011	LOC113745011	NLR family CARD domain-containing protein 3-like	1.898	0.0222065	up	8.79	8.94	12.64	18.02	19.99	21.3	10.1233	19.77
rna-XM_027282728.1	gene-afmid	afmid	arylformamidase, transcript variant X1	3.538	0.0222229	up	1.22	0.45	0.46	2.16	3.28	2.29	0.71	2.57667
rna-XM_027275375.1	gene-LOC113744684	LOC113744684	tripartite motif-containing protein 16-like	1.824	0.0223758	up	3.13	3.36	3.91	8.31	4.55	6.28	3.46667	6.38
rna-XM_010729403.3	gene-pstpip1	pstpip1	proline-serine-threonine phosphatase interacting protein 1, transcript variant X2	1.664	0.0223805	up	4.02	4.79	2.97	5.1	7.09	7.47	3.92667	6.55333
rna-XM_019255300.2	gene-dkk2	dkk2	dickkopf WNT signaling pathway inhibitor 2, transcript variant X1	58.645	0.0223875	up	0	0	0	0.22	0.26	0	0	0.16
rna-XM_019256877.2	gene-LOC104937242	LOC104937242	natural resistance-associated macrophage protein 2, transcript variant X1	3.076	0.0228158	up	0.71	2.58	1.76	3.06	4.24	8.1	1.68333	5.13333
rna-XM_010741092.3	gene-LOC104927092	LOC104927092	endoplasmic reticulum junction formation protein lunapark-B, transcript variant X1	318.455	0.0229275	up	0	0	0	0	2.46	0.02	0	0.826667
rna-XM_019272070.2	gene-mosmo	mosmo	modulator of smoothened, transcript variant X2	44.015	0.0231239	up	0	0	0	0.16	0.19	0.07	0	0.14
rna-XM_027288366.1	gene-lama5	lama5	laminin subunit alpha 5, transcript variant X3	20.729	0.0238553	up	0.04	0	0.16	1.01	3.11	0.17	0.0666667	1.43
rna-XM_027286496.1	gene-LOC104920194	LOC104920194	metastasis suppressor protein 1, transcript variant X3	68.763	0.0243237	up	0	0	0	0.09	0.2	0.02	0	0.103333
rna-XM_027272483.1	gene-zbed4	zbed4	zinc finger BED-type containing 4, transcript variant X4	904.847	0.02452	up	0	0	0	2.79	0	1.23	0	1.34
rna-XR_003463322.1	gene-jmjd6	jmjd6	jumonji domain containing 6, arginine demethylase and lysine hydroxylase, transcript variant X2	969.171	0.0248705	up	0	0	0	4.9	2.39	0	0	2.43
rna-XM_027281245.1	gene-LOC104939493	LOC104939493	chymotrypsin A	32.046	0.0251282	up	0.51	0.26	2.02	3.81	1.57	85.75	0.93	30.3767
rna-XM_027289087.1	gene-LOC104938682	LOC104938682	uncharacterized LOC104938682, transcript variant X2	35.808	0.0252145	up	0	0	0	0.03	0.06	0.05	0	0.0466667
rna-XM_019255831.2	gene-was	was	Wiskott-Aldrich syndrome, transcript variant X2	1.622	0.0252989	up	7.27	4.7	4.88	8.48	11.42	7.68	5.61667	9.19333
rna-XM_010732769.3	gene-h6pd	h6pd	hexose-6-phosphate dehydrogenase/glucose 1-dehydrogenase, transcript variant X1	598.295	0.0253113	up	0	0	0	0	1.84	1.33	0	1.05667
rna-XM_019274328.2	gene-LOC104920755	LOC104920755	protein LSM14 homolog A, transcript variant X2	1.516	0.0257423	up	3.01	2.47	2.43	4.6	4.3	3.19	2.63667	4.03
rna-XM_019261876.2	gene-znf207	znf207	zinc finger protein 207, transcript variant X2	45.247	0.0258159	up	0	0	0	0.07	0.14	0.28	0	0.163333
rna-XM_019259122.2	gene-LOC104939018	LOC104939018	hypothetical protein, transcript variant X1	1222.22	0.0258563	up	0	0	0	6.59	2.07	0	0	2.88667
rna-XM_027274027.1	gene-LOC109138445	LOC109138445	chymotrypsin-like elastase family member 1	57.471	0.0259983	up	0	0.32	0.12	0.75	0.34	25.98	0.146667	9.02333
rna-XM_027274926.1	gene-LOC104929996	LOC104929996	ribosomal protein S6 kinase alpha-5, transcript variant X2	88.442	0.0260223	up	0	0	0	0.01	0.12	0.18	0	0.103333
rna-XM_027289326.1	gene-bahcc1	bahcc1	BAH domain and coiled-coil containing 1, transcript variant X3	612.44	0.0262293	up	0	0	0	0	0.84	0.38	0	0.406667
rna-XM_027285215.1	gene-anapc2	anapc2	anaphase promoting complex subunit 2, transcript variant X5	504.548	0.0262611	up	0	0	0	0	1.65	2.09	0	1.24667
rna-XM_027285213.1	gene-anapc2	anapc2	anaphase promoting complex subunit 2, transcript variant X3	587.341	0.0263354	up	0	0	0	0	1.43	2.9	0	1.44333
rna-XM_019272803.2	gene-cpeb3	cpeb3	cytoplasmic polyadenylation element binding protein 3, transcript variant X6	2.516	0.0263745	up	0.16	0.24	0.39	0.46	0.73	0.8	0.263333	0.663333
rna-XM_019266219.2	gene-LOC104926188	LOC104926188	rho guanine nucleotide exchange factor 18, transcript variant X2	694.995	0.0264563	up	0	0	0	1.15	2.62	0	0	1.25667
rna-XM_027277774.1	gene-LOC104925812	LOC104925812	protein FAM83H-like, transcript variant X2	508.09	0.0266665	up	0	0	0	0	0.63	1.05	0	0.56
rna-XM_010734739.3	gene-LOC104922033	LOC104922033	elastase-1	35.101	0.0266732	up	0.31	0.08	0.23	0.81	0.25	21.52	0.206667	7.52667
rna-XM_019278986.2	gene-szt2	szt2	SZT2, KICSTOR complex subunit, transcript variant X4	1.937	0.0268255	up	0.64	0.55	0.52	0.61	1.44	1.28	0.57	1.11
rna-XM_019267759.2	gene-LOC104929832	LOC104929832	E3 ubiquitin-protein ligase HECW2, transcript variant X2	452.778	0.0268609	up	0	0	0	0	0.59	0.54	0	0.376667
rna-XM_019262600.2	gene-LOC104935046	LOC104935046	ATP-dependent RNA helicase DDX3X, transcript variant X6	493.742	0.0270007	up	0	0	0	0.49	0	0.91	0	0.466667
rna-XM_019273710.2	gene-LOC104918110	LOC104918110	serine/threonine-protein phosphatase 6 regulatory subunit 2-like, transcript variant X2	458.808	0.0270809	up	0	0	0	0	0.92	0.61	0	0.51
rna-XM_010752851.3	gene-tmem71	tmem71	transmembrane protein 71, transcript variant X1	2.354	0.027112	up	0.85	0.85	1.73	1.78	2.96	3.37	1.14333	2.70333
rna-XM_027274975.1	gene-nin	nin	ninein, transcript variant X2	1.539	0.0271271	up	1.34	1.13	1.14	1.57	1.97	2.03	1.20333	1.85667
rna-XM_010730939.3	gene-kank4	kank4	KN motif and ankyrin repeat domains 4, transcript variant X1	2.443	0.0273369	up	0.7	0.27	0.7	1.32	1.87	0.94	0.556667	1.37667
rna-XM_010737431.3	gene-trip12	trip12	thyroid hormone receptor interactor 12, transcript variant X4	2.429	0.027343	up	0.21	0.21	0.37	0.68	0.66	0.57	0.263333	0.636667
rna-XR_003463535.1	gene-LOC104939468	LOC104939468	gastrula zinc finger protein XlCGF57.1, transcript variant X3	40.299	0.027349	up	0	0	0	0.1	0.19	0.05	0	0.113333
rna-XM_019273848.2	gene-LOC104936322	LOC104936322	beta-centractin	1.51	0.0274627	up	18.87	21.31	13.98	34.5	23.44	24.25	18.0533	27.3967
rna-XM_019265856.2	gene-bach2	bach2	BTB domain and CNC homolog 2, transcript variant X5	40.996	0.0275099	up	0	0	0	0.02	0.09	0.04	0	0.05
rna-XM_027275703.1	gene-LOC113744762	LOC113744762	sorting nexin-12-like	116.989	0.0276989	up	0	0	0	2.56	1.19	0.05	0	1.26667
rna-XM_027287195.1	gene-LOC104929582	LOC104929582	ral guanine nucleotide dissociation stimulator-like 2, transcript variant X3	1.528	0.0277144	up	3.56	3.44	2.46	5.45	3.94	5.11	3.15333	4.83333
rna-XM_010751838.3	gene-cdh5	cdh5	cadherin 5	1727.31	0.0277779	up	0	0	0	0.88	0	5.15	0	2.01
rna-XM_027286816.1	gene-snx13	snx13	sorting nexin 13, transcript variant X2	478.416	0.02784	up	0	0	0	0.66	1.14	0	0	0.6
rna-XM_027272032.1	gene-celf2	celf2	CUGBP Elav-like family member 2, transcript variant X24	47.91	0.0278938	up	0	0	0	0.02	0.13	0.11	0	0.0866667
rna-XM_010732768.3	gene-LOC104920492	LOC104920492	retinoid-binding protein 7	2.784	0.0281463	up	12.8	16.04	4.96	36.07	43.79	16.59	11.2667	32.15
rna-XM_010731585.3	gene-slc16a9	slc16a9	solute carrier family 16 member 9, transcript variant X1	1.619	0.0282295	up	6.96	10.61	6.58	12.65	10.21	16.21	8.05	13.0233
rna-XM_027284729.1	gene-LOC109138253	LOC109138253	uncharacterized LOC109138253	33.63	0.0283156	up	0.12	0	0.06	0.03	4.61	1.81	0.06	2.15
rna-XM_027283015.1	gene-LOC104925456	LOC104925456	somatostatin receptor type 5	30.444	0.0283603	up	0	0	0	0.09	0.07	0.08	0	0.08
rna-XM_010739947.3	gene-ppp1r1b	ppp1r1b	protein phosphatase 1 regulatory inhibitor subunit 1B, transcript variant X1	2.337	0.0284445	up	0.72	0.78	0.43	1.37	1.91	1.27	0.643333	1.51667
rna-XM_027289992.1	gene-LOC104940290	LOC104940290	receptor-type tyrosine-protein phosphatase F, transcript variant X10	63.146	0.0284465	up	0	0	0	0.13	0.01	0.05	0	0.0633333
rna-XM_027287665.1	gene-LOC109140827	LOC109140827	uncharacterized LOC109140827, transcript variant X2	37.387	0.02845	up	0	0	0	0.04	0.13	0.08	0	0.0833333
rna-XM_010731289.3	gene-gale	gale	UDP-galactose-4-epimerase, transcript variant X3	2.074	0.0285622	up	1.77	2.03	1.28	3.7	3.47	3.47	1.69333	3.54667
rna-XM_019268495.2	gene-LOC104940643	LOC104940643	CUGBP Elav-like family member 2, transcript variant X3	41.729	0.029044	up	0.01	0	0	0.01	0.09	0.44	0.00333333	0.18
rna-XM_010729491.3	gene-gar1	gar1	GAR1 ribonucleoprotein, transcript variant X1	1.816	0.0290846	up	3.71	6.07	4.04	10.56	9.05	5.69	4.60667	8.43333
rna-XM_027275561.1	gene-LOC113744735	LOC113744735	tyrosine-protein phosphatase non-receptor type 18-like, transcript variant X1	401.932	0.0291615	up	0	0	0	1.88	3.26	0	0	1.71333
rna-XM_019271227.2	gene-LOC104936893	LOC104936893	filamin-C, transcript variant X10	352.577	0.0292685	up	0	0	0	0.51	0	0.31	0	0.273333
rna-XM_010742540.3	gene-ap1s2	ap1s2	adaptor related protein complex 1 subunit sigma 2, transcript variant X9	32.42	0.0292883	up	0	0	0	0.67	0.29	0.37	0	0.443333
rna-XM_019268298.2	gene-kdm6a	kdm6a	lysine demethylase 6A, transcript variant X2	574.872	0.029289	up	0	0	0	1.65	0.46	0	0	0.703333
rna-XM_010735433.3	gene-nfyc	nfyc	nuclear transcription factor Y subunit gamma, transcript variant X7	4.395	0.0294244	up	3.58	0.65	0.63	4.74	6.92	10.04	1.62	7.23333
rna-XR_002042701.2	gene-cih2orf69	cih2orf69	chromosome I C2orf69 homolog, transcript variant X2	382.87	0.0296047	up	0	0	0	0.74	0	1.68	0	0.806667
rna-XM_027275357.1	gene-LOC104939988	LOC104939988	zinc finger protein 879, transcript variant X3	333.296	0.0296099	up	0	0	0	0	1.04	1.31	0	0.783333
rna-XM_027282086.1	gene-srek1	srek1	splicing regulatory glutamic acid and lysine rich protein 1, transcript variant X6	318.688	0.0302037	up	0	0	0	0	0.6	0.86	0	0.486667
rna-XM_019269035.2	gene-LOC104928144	LOC104928144	ATP-binding cassette sub-family A member 5, transcript variant X1	1.92	0.0302891	up	1.92	0.78	1.1	2.31	2.63	2.41	1.26667	2.45
rna-XR_003464013.1	gene-midn	midn	midnolin, transcript variant X2	334.677	0.0303512	up	0	0	0	0.78	0.59	0	0	0.456667
rna-XM_019253103.2	gene-LOC104923826	LOC104923826	high affinity cationic amino acid transporter 1, transcript variant X5	24.831	0.0306213	up	0.01	0	0	0.28	0.04	0.09	0.00333333	0.136667
rna-XM_027291632.1	gene-nid2	nid2	nidogen 2, transcript variant X7	40.147	0.0308807	up	0	0	0	0.04	0.06	0.01	0	0.0366667
rna-XM_027284835.1	gene-cenpu	cenpu	centromere protein U, transcript variant X2	377.528	0.0310973	up	0	0	0	1.31	0	4.14	0	1.81667
rna-XM_027276325.1	gene-fuk	fuk	fucokinase, transcript variant X1	707.562	0.0311678	up	0	0	0	3.7	0.61	0	0	1.43667
rna-XM_019269632.2	gene-LOC109140959	LOC109140959	transcription factor E2-alpha, transcript variant X4	68.626	0.0311975	up	0	0	0.01	0	0.74	0.33	0.00333333	0.356667
rna-XM_027286173.1	gene-LOC113747243	LOC113747243	zinc finger BED domain-containing protein 1-like, transcript variant X1	35.456	0.0312366	up	0	0	0	0.18	0.23	0	0	0.136667
rna-XM_027283112.1	gene-LOC104921560	LOC104921560	perforin-1, transcript variant X3	488.209	0.0312645	up	0	0	0	4.74	1.12	0	0	1.95333
rna-XM_027272413.1	gene-zcrb1	zcrb1	zinc finger CCHC-type and RNA binding motif containing 1, transcript variant X1	332.315	0.0313753	up	0	0	0	7.72	0	2.9	0	3.54
rna-XM_027279210.1	gene-rdh5	rdh5	retinol dehydrogenase 5, transcript variant X4	39.693	0.0313934	up	0	0	0	0.17	0.03	0.14	0	0.113333
gene-LOC113746880	gene-LOC113746880	LOC113746880	-	296.707	0.0313971	up	0	0	0	1.7	1.9	0	0	1.2
rna-XM_019278645.2	gene-LOC104934934	LOC104934934	tetratricopeptide repeat protein 28, transcript variant X2	295.483	0.0314201	up	0	0	0	0.37	0.39	0	0	0.253333
rna-XM_010754823.3	gene-LOC104938433	LOC104938433	high choriolytic enzyme 1	66.666	0.0315946	up	0.08	0	0	0.09	0.26	7.14	0.0266667	2.49667
rna-XM_027273324.1	gene-srrt	srrt	serrate, RNA effector molecule, transcript variant X2	2.21	0.03163	up	1.55	1.02	1.37	1.65	2.88	4.22	1.31333	2.91667
rna-XM_019262338.2	gene-LOC104918256	LOC104918256	bromodomain adjacent to zinc finger domain protein 2B, transcript variant X7	469.167	0.0317043	up	0	0	0	0.92	0	0.18	0	0.366667
rna-XM_019259266.2	gene-LOC104932970	LOC104932970	sodium channel protein type 8 subunit alpha, transcript variant X4	328.841	0.0317809	up	0	0	0	0	0.48	0.17	0	0.216667
rna-XR_003461684.1	gene-LOC104918999	LOC104918999	coiled-coil domain-containing protein 158, transcript variant X2	286.725	0.0317896	up	0	0	0	0.85	0.99	0	0	0.613333
rna-XM_019257631.2	gene-LOC104932961	LOC104932961	uncharacterized LOC104932961, transcript variant X1	72.662	0.0318458	up	0	0.08	0	1.3	4.63	0	0.0266667	1.97667
rna-XM_010746402.3	gene-LOC104931404	LOC104931404	protein shisa-5, transcript variant X1	1.518	0.0319463	up	6.01	10.98	7.75	12.94	13.35	11.44	8.24667	12.5767
rna-XM_019268375.2	gene-LOC104939122	LOC104939122	death-inducer obliterator 1, transcript variant X1	304.444	0.0319546	up	0	0	0	0	0.52	0.22	0	0.246667
rna-XM_019278435.2	gene-LOC104933609	LOC104933609	ATP-dependent RNA helicase DDX3X, transcript variant X1	406.055	0.0320255	up	0	0	0	0	1.29	0.3	0	0.53
rna-XM_010732285.3	gene-LOC104920125	LOC104920125	leucine-rich repeat-containing protein 51, transcript variant X1	310.727	0.032047	up	0	0	0	0.94	1.91	0	0	0.95
rna-XM_019277780.2	gene-LOC104937339	LOC104937339	microtubule-associated protein tau, transcript variant X15	47.475	0.0320944	up	0	0	0	0.33	0	0.04	0	0.123333
rna-XM_010732416.3	gene-LOC104920226	LOC104920226	chymotrypsin-like elastase family member 2A	38.743	0.0321382	up	0.46	0.24	1.66	1.87	0.91	90.06	0.786667	30.9467
rna-XM_019274880.2	gene-tlr3	tlr3	toll like receptor 3, transcript variant X2	505.112	0.0324346	up	0	0	0	2.65	0.49	0	0	1.04667
rna-XM_019256064.2	gene-prmt9	prmt9	protein arginine methyltransferase 9	282.714	0.0324455	up	0	0	0	0.53	0	1.15	0	0.56
rna-XM_027286132.1	gene-col16a1	col16a1	collagen type XVI alpha 1 chain, transcript variant X1	507.927	0.0328161	up	0	0	0	0.22	0	1.42	0	0.546667
rna-XM_010737721.3	gene-LOC104924390	LOC104924390	hepatoma-derived growth factor-related protein 2, transcript variant X3	2.381	0.0328986	up	1.92	0.97	0.88	3.19	2.36	3.54	1.25667	3.03
rna-XM_019262607.2	gene-LOC104935066	LOC104935066	histone deacetylase 4, transcript variant X7	249.333	0.0329022	up	0	0	0	0	0.46	0.31	0	0.256667
rna-XM_027275002.1	gene-actn1	actn1	actinin alpha 1, transcript variant X3	373.288	0.0329577	up	0	0	0	0	3.57	0	0	1.19
rna-XM_027291698.1	gene-LOC104929102	LOC104929102	probable ribonuclease ZC3H12C, transcript variant X2	289.771	0.032997	up	0	0	0	0.78	0	0.28	0	0.353333
rna-XM_019278527.2	gene-sncaip	sncaip	synuclein alpha interacting protein, transcript variant X2	255.858	0.0330446	up	0	0	0	0.36	0.36	0	0	0.24
rna-XM_010744594.3	gene-tent5a	tent5a	terminal nucleotidyltransferase 5A	2.455	0.033084	up	0.8	0.97	1.71	4.17	2.13	2.33	1.16	2.87667
rna-XM_019273673.2	gene-mybl1	mybl1	MYB proto-oncogene like 1, transcript variant X2	261.126	0.0331442	up	0	0	0	0.4	0.58	0	0	0.326667
rna-XM_019274426.2	gene-dnajb9	dnajb9	DnaJ heat shock protein family (Hsp40) member B9, transcript variant X2	2.233	0.0331779	up	1.49	1.37	2.21	2.85	2.84	5.68	1.69	3.79
rna-XM_010747436.3	gene-hoxc8	hoxc8	homeobox C8	25.166	0.0332997	up	0	0	0	0.05	0.05	0.05	0	0.05
rna-XM_019271980.2	gene-shoc2	shoc2	SHOC2, leucine rich repeat scaffold protein, transcript variant X2	394.105	0.0333074	up	0	0	0	0.32	1.41	0	0	0.576667
rna-XM_027280512.1	gene-LOC104930607	LOC104930607	transmembrane protein 87A-like, transcript variant X2	338.559	0.0333237	up	0	0	0	1.79	0	0	0	0.596667
rna-XR_003462930.1	gene-cc2d1a	cc2d1a	coiled-coil and C2 domain containing 1A, transcript variant X4	239.373	0.0334552	up	0	0	0	0.67	0	0.4	0	0.356667
rna-XM_027282721.1	gene-atf7ip	atf7ip	activating transcription factor 7 interacting protein, transcript variant X7	268.733	0.0335109	up	0	0	0	0.99	0.51	0	0	0.5
rna-XM_019259837.2	gene-pkp4	pkp4	plakophilin 4, transcript variant X5	260.5	0.0337068	up	0	0	0	0.83	0.45	0	0	0.426667
rna-XM_010741394.3	gene-LOC104927319	LOC104927319	furin-1-like, transcript variant X4	252.483	0.0337526	up	0	0	0	0.29	0.47	0	0	0.253333
rna-XM_027281499.1	gene-LOC113746327	LOC113746327	60S ribosomal protein L12, transcript variant X3	269.957	0.0339069	up	0	0	0	0	12.41	4.53	0	5.64667
rna-XR_003461746.1	gene-ythdc2	ythdc2	YTH domain containing 2, transcript variant X4	218.124	0.0341092	up	0	0	0	0.37	0	0.4	0	0.256667
rna-XM_010743188.3	gene-LOC104928835	LOC104928835	sodium/calcium exchanger 1, transcript variant X2	236.265	0.0342793	up	0	0	0	0.2	0.27	0	0	0.156667
rna-XM_027278417.1	gene-LOC104939402	LOC104939402	protocadherin alpha-C2, transcript variant X8	33.285	0.0345812	up	0	0	0	0.04	0	0.12	0	0.0533333
rna-XM_010736041.3	gene-nbn	nbn	nibrin	1.724	0.0346681	up	1.78	1.84	2.27	3.68	4.41	2.16	1.96333	3.41667
rna-XM_027287458.1	gene-LOC104938693	LOC104938693	transcription factor HIVEP3-like, transcript variant X6	225.004	0.0346935	up	0	0	0	0.34	0.35	0	0	0.23
rna-XM_027274397.1	gene-ppp1r16a	ppp1r16a	protein phosphatase 1 regulatory subunit 16A, transcript variant X2	279.351	0.03476	up	0	0	0	1.24	0	0.34	0	0.526667
rna-XM_027272802.1	gene-snapc5	snapc5	small nuclear RNA activating complex polypeptide 5, transcript variant X2	2.853	0.0347912	up	0.86	1.49	1.02	2.28	4.09	3.35	1.12333	3.24
rna-XM_019255937.2	gene-LOC104932278	LOC104932278	misshapen-like kinase 1, transcript variant X1	1.781	0.0348499	up	0.73	1	1.32	1.61	2.5	1.33	1.01667	1.81333
rna-XM_019265683.2	gene-mapk6	mapk6	mitogen-activated protein kinase 6, transcript variant X3	232.875	0.0348559	up	0	0	0	0.87	0	0.38	0	0.416667
rna-XM_010729956.3	gene-LOC104918258	LOC104918258	WD repeat, SAM and U-box domain-containing protein 1, transcript variant X4	2.175	0.0352861	up	1.57	1.09	1.39	2.19	2.68	4.01	1.35	2.96
rna-XM_019256075.2	gene-rbpms	rbpms	RNA binding protein, mRNA processing factor, transcript variant X4	226.634	0.0354012	up	0	0	0	0.54	0.95	0	0	0.496667
rna-XM_019264562.2	gene-LOC104924428	LOC104924428	transcription factor 7, transcript variant X6	200.212	0.0354098	up	0	0	0	0	0.6	0.54	0	0.38
rna-XM_027291341.1	gene-chaf1b	chaf1b	chromatin assembly factor 1 subunit B, transcript variant X2	314.926	0.0355636	up	0	0	0	2.74	0.62	0	0	1.12
rna-XM_027287223.1	gene-LOC104927339	LOC104927339	polyserase-2	27.378	0.0356173	up	0.47	0.79	2.71	2.79	1.33	104.24	1.32333	36.12
rna-XM_027284262.1	gene-mia3	mia3	MIA SH3 domain ER export factor 3, transcript variant X5	237.035	0.0357718	up	0	0	0	0	0.69	0.24	0	0.31
rna-XM_027285785.1	gene-LOC104940306	LOC104940306	rho GTPase-activating protein 44-like, transcript variant X3	26.578	0.0358109	up	0	0	0	0.05	0.12	0.07	0	0.08
rna-XM_027290586.1	gene-LOC104929477	LOC104929477	E3 ubiquitin-protein ligase HERC2, transcript variant X2	3.488	0.0359509	up	0.07	0.2	0.04	0.47	0.23	0.39	0.103333	0.363333
rna-XM_019256081.2	gene-LOC104926581	LOC104926581	GRAM domain-containing protein 4, transcript variant X2	312.26	0.0359897	up	0	0	0	0.88	0.12	0	0	0.333333
rna-XM_027289330.1	gene-slc38a10	slc38a10	solute carrier family 38 member 10, transcript variant X2	209.014	0.0363273	up	0	0	0	0.29	0	0.65	0	0.313333
rna-XM_027289967.1	gene-zbtb7a	zbtb7a	zinc finger and BTB domain containing 7A, transcript variant X3	198.784	0.036338	up	0	0	0	0.25	0.24	0	0	0.163333
rna-XM_019255735.2	gene-otc	otc	ornithine carbamoyltransferase	1.779	0.0364585	up	18.01	15.49	17.71	34.51	16.91	40.32	17.07	30.58
rna-XM_027280392.1	gene-LOC104935221	LOC104935221	poly [ADP-ribose] polymerase 14, transcript variant X2	14.114	0.0366395	up	0.39	0.68	0.36	0.31	1.17	18.37	0.476667	6.61667
rna-XM_010735735.3	gene-LOC104922804	LOC104922804	chymotrypsin-like elastase family member 2A	26.127	0.0366494	up	0.21	0.14	1.91	2.42	1.19	56.24	0.753333	19.95
rna-XM_019263225.2	gene-heatr5a	heatr5a	HEAT repeat containing 5A, transcript variant X4	356.706	0.0367433	up	0	0	0	0.71	0	0.09	0	0.266667
rna-XM_027280457.1	gene-LOC104923549	LOC104923549	dixin-A, transcript variant X1	183.217	0.0367726	up	0	0	0	1.73	0	1.19	0	0.973333
rna-XM_019262126.2	gene-LOC104919218	LOC104919218	fibroblast growth factor 12, transcript variant X3	4.542	0.0368337	up	0.49	0.07	0.6	0.93	1.78	2.57	0.386667	1.76
rna-XM_027291664.1	gene-LOC104937500	LOC104937500	vang-like protein 1, transcript variant X8	177.254	0.0374389	up	0	0	0	0	0.39	0.53	0	0.306667
rna-XM_019263977.2	gene-LOC104925373	LOC104925373	CREB-binding protein, transcript variant X1	172.553	0.0376138	up	0	0	0	0.25	0	0.18	0	0.143333
rna-XM_019265078.2	gene-pde8b	pde8b	phosphodiesterase 8B, transcript variant X1	28.17	0.0380003	up	0	0	0	0.02	0.07	0.02	0	0.0366667
rna-XM_010733697.3	gene-tacc1	tacc1	transforming acidic coiled-coil containing protein 1, transcript variant X4	76.781	0.0380877	up	0	0	0.03	2.32	0.2	0	0.01	0.84
rna-XM_019266514.2	gene-LOC104926141	LOC104926141	serine/threonine-protein kinase LATS1, transcript variant X2	179.356	0.0381382	up	0	0	0	0	0.26	0.49	0	0.25
rna-XM_010730905.3	gene-LOC104919005	LOC104919005	RNA exonuclease 1 homolog, transcript variant X1	191.896	0.0382822	up	0	0	0	0.27	0	0.71	0	0.326667
rna-XM_019277744.2	gene-LOC104936234	LOC104936234	E3 ubiquitin-protein ligase rnf213-beta, transcript variant X1	2.012	0.0383473	up	25.44	9.26	11.7	34.74	33.83	25.72	15.4667	31.43
rna-XM_027281364.1	gene-LOC104930106	LOC104930106	nuclear factor of activated T-cells 5-like, transcript variant X2	266.87	0.0383832	up	0	0	0	0	0.54	0.09	0	0.21
rna-XM_027272422.1	gene-tbc1d22a	tbc1d22a	TBC1 domain family member 22A, transcript variant X1	198.545	0.0384598	up	0	0	0	0	0.17	0.5	0	0.223333
rna-XM_027279217.1	gene-arhgap9	arhgap9	Rho GTPase activating protein 9, transcript variant X2	166.991	0.0385212	up	0	0	0	0	0.36	0.54	0	0.3
rna-XM_019257383.2	gene-mycbp2	mycbp2	MYC binding protein 2, E3 ubiquitin protein ligase, transcript variant X7	1.662	0.0386649	up	0.54	0.58	0.39	0.73	1.15	0.64	0.503333	0.84
rna-XM_027290274.1	gene-mutyh	mutyh	mutY DNA glycosylase, transcript variant X3	170.645	0.0386785	up	0	0	0	0.81	0.68	0	0	0.496667
rna-XM_027274735.1	gene-lrrc9	lrrc9	leucine rich repeat containing 9, transcript variant X7	25.441	0.0387587	up	0	0	0	0.03	0.06	0.02	0	0.0366667
rna-XM_027291153.1	gene-LOC104935178	LOC104935178	partitioning defective 3 homolog, transcript variant X4	228.333	0.0390297	up	0	0	0	0	0.11	0.5	0	0.203333
rna-XM_027284907.1	gene-caskin1	caskin1	CASK interacting protein 1, transcript variant X8	176.783	0.0391552	up	0	0	0	0.27	0	0.1	0	0.123333
rna-XM_019279354.2	gene-LOC104920058	LOC104920058	spectrin beta chain, erythrocytic, transcript variant X1	2.722	0.0392226	up	0.22	0.08	0.18	0.39	0.6	0.31	0.16	0.433333
rna-XM_019272518.2	gene-LOC104938526	LOC104938526	acetyl-coenzyme A synthetase, cytoplasmic, transcript variant X2	1.527	0.0392622	up	2.87	3.59	2.51	4.24	5.98	3.54	2.99	4.58667
rna-XM_027286274.1	gene-ubap2l	ubap2l	ubiquitin associated protein 2 like, transcript variant X1	54.105	0.0392778	up	0	0.06	0	0.02	3.62	0.13	0.02	1.25667
rna-XM_010739074.3	gene-LOC104925227	LOC104925227	C-terminal-binding protein 2, transcript variant X2	2.928	0.0392984	up	0.17	0.36	0.58	1.06	0.81	1.39	0.37	1.08667
rna-XM_010746069.3	gene-tbl1xr1	tbl1xr1	transducin beta like 1 X-linked receptor 1, transcript variant X4	2.452	0.0393501	up	0.24	0.55	0.43	0.88	1.5	0.63	0.406667	1.00333
rna-XM_027280911.1	gene-pqlc2l	pqlc2l	PQ loop repeat containing 2 like, transcript variant X1	152.96	0.0394271	up	0	0	0	0.47	0	0.56	0	0.343333
rna-XM_027291556.1	gene-sh3yl1	sh3yl1	SH3 and SYLF domain containing 1, transcript variant X2	22.204	0.0394945	up	0	0	0	0.07	0.07	0.12	0	0.0866667
rna-XM_027286433.1	gene-cep85	cep85	centrosomal protein 85, transcript variant X3	157.356	0.039508	up	0	0	0	0	0.36	0.54	0	0.3
rna-XM_027281116.1	gene-ppip5k1	ppip5k1	diphosphoinositol pentakisphosphate kinase 1, transcript variant X2	199.774	0.0395508	up	0	0	0	0.13	0.42	0	0	0.183333
rna-XM_019261205.2	gene-mast3	mast3	microtubule associated serine/threonine kinase 3, transcript variant X2	1.589	0.0396092	up	2.07	4.2	4.12	5.7	5.75	5.07	3.46333	5.50667
rna-XM_027273835.1	gene-LOC104932600	LOC104932600	Down syndrome cell adhesion molecule homolog, transcript variant X1	142.972	0.0396375	up	0	0	0	0.16	0	0.24	0	0.133333
rna-XM_010740860.3	gene-erbb2	erbb2	erb-b2 receptor tyrosine kinase 2, transcript variant X1	160.741	0.0396442	up	0	0	0	0	0.36	0.2	0	0.186667
rna-XM_027282051.1	gene-LOC104925421	LOC104925421	nipped-B-like protein, transcript variant X1	153.681	0.0396464	up	0	0	0	0	0.21	0.16	0	0.123333
rna-XM_019258028.2	gene-tedc2	tedc2	tubulin epsilon and delta complex 2, transcript variant X4	5.409	0.039683	up	0.08	0.15	0.05	0.52	0.66	0.42	0.0933333	0.533333
rna-XM_027275670.1	gene-LOC104937445	LOC104937445	suppressor of tumorigenicity 14 protein	25.266	0.0398104	up	0	0	0.01	0.03	0.41	0.07	0.00333333	0.17
rna-XR_003464156.1	gene-gpr143	gpr143	G protein-coupled receptor 143, transcript variant X2	147.689	0.0398795	up	0	0	0	0.73	0	0.78	0	0.503333
rna-XM_019263432.2	gene-LOC104927176	LOC104927176	monocarboxylate transporter 7, transcript variant X2	2.259	0.0399176	up	0.81	3.33	2.09	4.59	4.93	4.51	2.07667	4.67667
rna-XM_027283686.1	gene-LOC109138713	LOC109138713	ewing's tumor-associated antigen 1, transcript variant X2	18.294	0.0399713	up	0	0	0.2	2.01	1.08	0.71	0.0666667	1.26667
rna-XM_027275571.1	gene-ep400	ep400	E1A binding protein p400, transcript variant X9	178.388	0.0400377	up	0	0	0	0	0.28	0.09	0	0.123333
rna-XM_027276940.1	gene-LOC104939383	LOC104939383	centrosomal protein of 85 kDa-like, transcript variant X4	156.099	0.0400726	up	0	0	0	0	0.37	0.65	0	0.34
rna-XM_027272147.1	gene-LOC109136695	LOC109136695	choline kinase alpha, transcript variant X2	151.903	0.0401023	up	0	0	0	0.27	0	0.44	0	0.236667
rna-XM_027283044.1	gene-LOC113746624	LOC113746624	vacuolar ATPase assembly integral membrane protein vma21-like	25.402	0.0402113	up	0	0	0	0.36	1.2	1.28	0	0.946667
rna-XM_010734741.3	gene-LOC104922035	LOC104922035	elastase-1	33.281	0.040279	up	0.07	0	0.48	1.1	0.22	17.84	0.183333	6.38667
rna-XM_027277246.1	gene-LOC104923470	LOC104923470	probable global transcription activator SNF2L2, transcript variant X3	162.357	0.0402915	up	0	0	0	0	0.4	0.17	0	0.19
rna-XM_027274332.1	gene-LOC104934169	LOC104934169	disco-interacting protein 2 homolog C, transcript variant X2	261.074	0.0404437	up	0	0	0	0.13	0.83	0	0	0.32
rna-XM_019277396.2	gene-ivns1abp	ivns1abp	influenza virus NS1A binding protein, transcript variant X2	316.397	0.040445	up	0	0	0	1.96	0.22	0	0	0.726667
rna-XM_027277567.1	gene-LOC104921673	LOC104921673	protease-associated domain-containing protein 1, transcript variant X2	157.103	0.0404699	up	0	0	0	1.62	2.5	0	0	1.37333
rna-XM_027290982.1	gene-LOC104938538	LOC104938538	uncharacterized LOC104938538, transcript variant X2	2.647	0.040473	up	0.71	0.67	1.8	3.02	1.59	3.86	1.06	2.82333
rna-XM_019261130.2	gene-LOC104932118	LOC104932118	inositol hexakisphosphate and diphosphoinositol-pentakisphosphate kinase 2, transcript variant X1	178.217	0.0406363	up	0	0	0	0.14	0	0.45	0	0.196667
rna-XM_027274004.1	gene-trmt2a	trmt2a	tRNA methyltransferase 2 homolog A, transcript variant X3	145.372	0.0407065	up	0	0	0	0	0.58	0.38	0	0.32
rna-XM_027281403.1	gene-LOC104920144	LOC104920144	GC-rich sequence DNA-binding factor 2, transcript variant X4	347.639	0.0407727	up	0	0	0	2.03	0.19	0	0	0.74
rna-XM_027280198.1	gene-sipa1l3	sipa1l3	signal induced proliferation associated 1 like 3, transcript variant X2	173.227	0.0408078	up	0	0	0	0.1	0.27	0	0	0.123333
rna-XM_010742093.3	gene-LOC104927908	LOC104927908	membrane-associated guanylate kinase, WW and PDZ domain-containing protein 1, transcript variant X7	188.925	0.0410601	up	0	0	0	0.46	0.13	0	0	0.196667
rna-XM_027272110.1	gene-LOC104933817	LOC104933817	non-muscle caldesmon, transcript variant X2	206.656	0.0411714	up	0	0	0	0	1	0.19	0	0.396667
rna-XM_027282348.1	gene-LOC113746486	LOC113746486	uncharacterized LOC113746486, transcript variant X2	135.135	0.0412955	up	0	0	0	0.62	0	0.51	0	0.376667
rna-XM_027286300.1	gene-LOC104940361	LOC104940361	DENN domain-containing protein 3, transcript variant X2	151.661	0.0413133	up	0	0	0	0	0.23	0.5	0	0.243333
rna-XM_019274539.2	gene-cc2d1b	cc2d1b	coiled-coil and C2 domain containing 1B, transcript variant X3	225.15	0.041388	up	0	0	0	0	0.87	0.14	0	0.336667
rna-XM_019259161.2	gene-aig1	aig1	androgen induced 1	2.059	0.0414878	up	2.17	1.56	1.47	3.91	4.07	2.9	1.73333	3.62667
rna-XM_027276722.1	gene-fat3	fat3	FAT atypical cadherin 3, transcript variant X5	261.466	0.0416214	up	0	0	0	0	0.3	0.03	0	0.11
rna-XM_019260668.2	gene-fbxo16	fbxo16	F-box protein 16	22.571	0.0416435	up	0	0	0	0.02	0.04	0.06	0	0.04
rna-XM_019262634.2	gene-LOC104927464	LOC104927464	zinc finger protein 879, transcript variant X1	1.634	0.041696	up	2.18	3.84	3.98	5.33	5.53	5.54	3.33333	5.46667
rna-XM_027272402.1	gene-LOC113744085	LOC113744085	protein FAM169B-like, transcript variant X3	130.851	0.0417423	up	0	0	0	0.83	0	0.77	0	0.533333
rna-XM_027278636.1	gene-LOC109143108	LOC109143108	bile salt-activated lipase, transcript variant X3	45.654	0.0420261	up	0.07	0	0	0.19	0.04	3.47	0.0233333	1.23333
rna-XM_010748642.3	gene-fbh1	fbh1	F-box DNA helicase 1, transcript variant X2	135.819	0.0422799	up	0	0	0	0.32	0.31	0	0	0.21
rna-XM_027288427.1	gene-mib1	mib1	mindbomb E3 ubiquitin protein ligase 1, transcript variant X5	127.23	0.0424238	up	0	0	0	0.19	0	0.25	0	0.146667
rna-XM_010739878.3	gene-klhl11	klhl11	kelch like family member 11, transcript variant X1	1.559	0.0425514	up	3.76	2.11	3.79	5.38	4.9	4.89	3.22	5.05667
rna-XM_019262452.2	gene-bap1	bap1	BRCA1 associated protein 1, transcript variant X3	1.991	0.0425751	up	0.82	1.71	1.02	3.23	1.93	1.94	1.18333	2.36667
rna-XM_010744339.3	gene-LOC104929745	LOC104929745	zinc finger protein 865, transcript variant X3	195.621	0.0426529	up	0	0	0	0	0.09	0.5	0	0.196667
rna-XR_797188.3	gene-pdgfa	pdgfa	platelet derived growth factor subunit A, transcript variant X1	70.656	0.0426911	up	0.01	0	0	0	1.24	0.04	0.00333333	0.426667
rna-XM_019277470.2	gene-snx14	snx14	sorting nexin 14, transcript variant X7	2.111	0.0427748	up	0.66	0.63	0.53	1.21	1.76	0.9	0.606667	1.29
rna-XM_027278656.1	gene-LOC104922895	LOC104922895	phosphatidylinositol 4-phosphate 5-kinase type-1 beta, transcript variant X2	128.217	0.0429011	up	0	0	0	0	0.44	0.27	0	0.236667
rna-XM_010737459.3	gene-fign	fign	fidgetin, microtubule severing factor, transcript variant X1	130.801	0.0429025	up	0	0	0	0.19	0.2	0	0	0.13
rna-XR_003463637.1	gene-LOC104919610	LOC104919610	DENN domain-containing protein 3, transcript variant X2	126.907	0.0429344	up	0	0	0	0	0.36	0.23	0	0.196667
rna-XM_019266772.2	gene-LOC104931865	LOC104931865	casein kinase I, transcript variant X4	1.7	0.0429719	up	4.1	5.22	2.79	5.48	9.4	5.8	4.03667	6.89333
rna-XM_010743275.3	gene-ppp1r14b	ppp1r14b	protein phosphatase 1 regulatory inhibitor subunit 14B	2.328	0.0430394	up	0.79	1	0.49	2.61	1.83	0.91	0.76	1.78333
rna-XM_010742565.3	gene-LOC104928275	LOC104928275	protein transport protein Sec31A	2.644	0.0430645	up	0.57	3.41	2.18	6.12	4.97	5.13	2.05333	5.40667
rna-XM_027281604.1	gene-LOC104918267	LOC104918267	interleukin-1 receptor accessory protein, transcript variant X3	2.999	0.043098	up	6.03	3.22	14.41	30.53	30.91	10.31	7.88667	23.9167
rna-XM_019258238.2	gene-letm1	letm1	leucine zipper and EF-hand containing transmembrane protein 1, transcript variant X3	121.626	0.0431262	up	0	0	0	0.17	0	0.21	0	0.126667
rna-XM_027285575.1	gene-LOC104932080	LOC104932080	zinc finger CCCH domain-containing protein 7B, transcript variant X3	2.527	0.0432437	up	0.36	1.06	0.6	2.04	0.96	2.09	0.673333	1.69667
rna-XM_019268484.2	gene-synpo	synpo	synaptopodin, transcript variant X1	1.937	0.0432476	up	1.23	1.26	2.79	4.18	3.71	2.4	1.76	3.43
rna-XM_027289901.1	gene-LOC104920723	LOC104920723	protein unc-13 homolog A, transcript variant X2	30.723	0.043278	up	0	0	0	0.01	0.02	0.07	0	0.0333333
rna-XM_010750466.3	gene-tmem131l	tmem131l	transmembrane 131 like, transcript variant X1	1.541	0.0433063	up	4.01	3.71	5.87	7.76	8.27	5.05	4.53	7.02667
rna-XM_027286266.1	gene-LOC104921522	LOC104921522	argonaute RISC catalytic component 4, transcript variant X7	138.686	0.043323	up	0	0	0	0.29	0.14	0	0	0.143333
rna-XM_027279032.1	gene-LOC104939093	LOC104939093	dnaJ homolog subfamily C member 16, transcript variant X2	131.532	0.043346	up	0	0	0	0.27	0.42	0	0	0.23
rna-XM_027286349.1	gene-LOC113747268	LOC113747268	trypsin-1	23.64	0.0434959	up	0.62	0.31	2.77	2.31	1.19	85.16	1.23333	29.5533
rna-XM_010732350.3	gene-dna2	dna2	DNA replication helicase/nuclease 2, transcript variant X1	187.449	0.0437038	up	0	0	0	0.65	0.12	0	0	0.256667
rna-XM_027291613.1	gene-LOC104917976	LOC104917976	inosine-uridine preferring nucleoside hydrolase, transcript variant X2	1.93	0.0439306	up	4.16	2.25	2.57	7.42	5.53	4.68	2.99333	5.87667
rna-XM_027277056.1	gene-LOC109140859	LOC109140859	stonustoxin subunit beta-like, transcript variant X1	1.852	0.0440511	up	5.2	6.27	10.81	18.51	8.91	13.98	7.42667	13.8
rna-XM_027281892.1	gene-dis3l	dis3l	DIS3 like exosome 3'-5' exoribonuclease, transcript variant X2	126.762	0.0440561	up	0	0	0	0	0.23	0.48	0	0.236667
rna-XM_019260087.2	gene-LOC104920221	LOC104920221	PR domain zinc finger protein 2, transcript variant X4	4.78	0.0440778	up	0.41	0.12	0.19	2.4	0.88	0.23	0.24	1.17
rna-XM_027272382.1	gene-recql	recql	RecQ like helicase, transcript variant X2	120.755	0.0440786	up	0	0	0	0	0.43	0.25	0	0.226667
rna-XM_027286461.1	gene-rims2	rims2	regulating synaptic membrane exocytosis 2, transcript variant X30	27.134	0.0441354	up	0	0	0	0.02	0.05	0.01	0	0.0266667
rna-XM_027287650.1	gene-LOC104937830	LOC104937830	myelin-oligodendrocyte glycoprotein-like, transcript variant X1	12.15	0.0442032	up	0	0.08	0.4	0.88	1.22	3.84	0.16	1.98
rna-XM_010733488.3	gene-msi1	msi1	musashi RNA binding protein 1, transcript variant X1	134.834	0.0442079	up	0	0	0	0.62	0	0.21	0	0.276667
rna-XM_019273860.2	gene-zbtb48	zbtb48	zinc finger and BTB domain containing 48, transcript variant X3	112.805	0.0446797	up	0	0	0	0.33	0	0.22	0	0.183333
rna-XM_019278449.2	gene-kmt2e	kmt2e	lysine methyltransferase 2E, transcript variant X4	116.124	0.0447522	up	0	0	0	0	0.14	0.23	0	0.123333
rna-XM_019262632.2	gene-calcr	calcr	calcitonin receptor, transcript variant X1	19.362	0.0450206	up	0	0	0	0.05	0	0.07	0	0.04
rna-XR_003463207.1	gene-LOC104921999	LOC104921999	structural maintenance of chromosomes protein 6, transcript variant X5	116.555	0.0450593	up	0	0	0	0	0.17	0.32	0	0.163333
rna-XM_027288347.1	gene-wdr6	wdr6	WD repeat domain 6, transcript variant X1	2.581	0.0452073	up	0.67	0.28	1.27	1.7	1.75	2.32	0.74	1.92333
rna-XM_027274512.1	gene-LOC113744544	LOC113744544	uncharacterized LOC113744544, transcript variant X3	33.833	0.0455152	up	0	0.03	0	1.3	0.89	0	0.01	0.73
rna-XM_019253354.2	gene-LOC104927930	LOC104927930	rac GTPase-activating protein 1, transcript variant X2	106.638	0.0456936	up	0	0	0	0	0.37	0.28	0	0.216667
rna-XM_027274429.1	gene-LOC104929372	LOC104929372	ubiquitin thioesterase Zranb1, transcript variant X3	123.541	0.0457952	up	0	0	0	0.74	0	0	0	0.246667
rna-XM_027273995.1	gene-sulf1	sulf1	sulfatase 1, transcript variant X5	110.62	0.0459241	up	0	0	0	0	0.16	0.28	0	0.146667
rna-XM_019255962.2	gene-LOC104930291	LOC104930291	uncharacterized LOC104930291, transcript variant X2	262.078	0.0460223	up	0	0	0	0.34	0	4.95	0	1.76333
rna-XM_010748958.3	gene-puf60	puf60	poly(U) binding splicing factor 60, transcript variant X6	1.883	0.0460456	up	6.07	9.85	5.5	14.68	18.54	7.4	7.14	13.54
rna-XM_027286127.1	gene-adgrb2	adgrb2	adhesion G protein-coupled receptor B2, transcript variant X1	110.713	0.0460513	up	0	0	0	0.21	0.15	0	0	0.12
rna-XM_027276351.1	gene-LOC113744989	LOC113744989	DDRGK domain-containing protein 1-like	99.901	0.0461032	up	0	0	0	1.58	0	0	0	0.526667
rna-XM_010731633.3	gene-stk40	stk40	serine/threonine kinase 40, transcript variant X4	3.244	0.0461168	up	0.9	0.3	0.57	0.57	2.31	2.9	0.59	1.92667
rna-XM_027277071.1	gene-LOC104928143	LOC104928143	ankyrin repeat and SOCS box protein 3, transcript variant X1	120.128	0.0461506	up	0	0	0	0.43	0.95	0	0	0.46
rna-XM_019265937.2	gene-mgp	mgp	matrix Gla protein, transcript variant X3	134.961	0.0462889	up	0	0	0	2.95	0.88	0	0	1.27667
rna-XM_019263541.2	gene-slc39a14	slc39a14	solute carrier family 39 member 14, transcript variant X3	109.892	0.0464946	up	0	0	0	0.39	0	0.17	0	0.186667
rna-XM_019254268.2	gene-LOC104924290	LOC104924290	putative ZDHHC-type palmitoyltransferase 6, transcript variant X5	1.834	0.0465171	up	1.82	1.36	1.05	2.08	2.31	3.41	1.41	2.6
rna-XM_027288090.1	gene-ctdnep1	ctdnep1	CTD nuclear envelope phosphatase 1, transcript variant X2	115.968	0.0466039	up	0	0	0	0.69	0.32	0	0	0.336667
rna-XM_027288272.1	gene-LOC104932111	LOC104932111	ankyrin repeat domain-containing protein SOWAHB, transcript variant X2	132.459	0.0466076	up	0	0	0	0.8	0.24	0	0	0.346667
rna-XM_019279428.2	gene-LOC104939709	LOC104939709	serine/threonine-protein kinase ppk4, transcript variant X10	1.549	0.0466341	up	1.94	3.35	2.59	3.91	3.99	4.34	2.62667	4.08
rna-XM_027291549.1	gene-LOC104935649	LOC104935649	kalirin, transcript variant X1	18.311	0.0467105	up	0	0	0	0.08	0.04	0	0	0.04
rna-XM_010734117.3	gene-trim25	trim25	tripartite motif containing 25, transcript variant X1	1.84	0.0467288	up	0.99	1.39	1.87	2.84	3.48	1.55	1.41667	2.62333
rna-XM_019267815.2	gene-LOC104931677	LOC104931677	MAP/microtubule affinity-regulating kinase 4, transcript variant X4	19.728	0.0468379	up	0	0	0	0.08	0.04	0.03	0	0.05
rna-XM_027291620.1	gene-ncam2	ncam2	neural cell adhesion molecule 2, transcript variant X1	18.339	0.0470068	up	0	0	0	0.06	0.04	0	0	0.0333333
rna-XM_027272068.1	gene-gata6	gata6	GATA binding protein 6, transcript variant X2	103.844	0.0472031	up	0	0	0	0	0.54	0.28	0	0.273333
rna-XM_027276157.1	gene-LOC113744939	LOC113744939	ribosome biogenesis protein wdr12-like	18.921	0.0472515	up	0	0	0	1.73	1.92	0.77	0	1.47333
rna-XM_027275836.1	gene-nvl	nvl	nuclear VCP-like, transcript variant X2	142.328	0.0472643	up	0	0	0	0.21	0.95	0	0	0.386667
rna-XM_019271944.2	gene-LOC104932515	LOC104932515	cone cGMP-specific 3',5'-cyclic phosphodiesterase subunit alpha', transcript variant X4	24.143	0.0472933	up	0	0	0	0.1	0	0.03	0	0.0433333
rna-XM_010743363.3	gene-LOC104928956	LOC104928956	motilin receptor-like	19.617	0.0473979	up	0	0	0	0.07	0.02	0.06	0	0.05
rna-XM_027275460.1	gene-cul1	cul1	cullin 1, transcript variant X1	99.039	0.0474389	up	0	0	0	0	0.23	0.35	0	0.193333
rna-XM_019274749.2	gene-usp30	usp30	ubiquitin specific peptidase 30, transcript variant X3	125.886	0.0475282	up	0	0	0	0.83	0.24	0	0	0.356667
rna-XM_010730997.3	gene-zar1	zar1	zygote arrest 1	19.7	0.0475404	up	0	0	0	0.06	0.17	0.15	0	0.126667
rna-XM_027277225.1	gene-LOC104923470	LOC104923470	probable global transcription activator SNF2L2, transcript variant X1	1.821	0.0475557	up	2.11	2.47	1.05	3.92	3.98	2.39	1.87667	3.43
rna-XM_027281993.1	gene-morn5	morn5	MORN repeat containing 5, transcript variant X4	101.027	0.04757	up	0	0	0	0	0.98	0.53	0	0.503333
rna-XR_003462486.1	gene-LOC104931327	LOC104931327	protransforming growth factor alpha, transcript variant X2	21.976	0.0476435	up	0	0	0	0.05	0.02	0.11	0	0.06
rna-XM_027275822.1	gene-actr6	actr6	ARP6 actin related protein 6 homolog, transcript variant X1	500.655	0.0476523	up	0	0	0	0.21	0	8.52	0	2.91
rna-XM_010734672.3	gene-LOC104921977	LOC104921977	cathepsin B	25.673	0.0476736	up	0	0	0	0.11	0.34	0.05	0	0.166667
rna-XM_010740371.3	gene-LOC104926502	LOC104926502	riboflavin transporter 2-like, transcript variant X3	94.857	0.0477135	up	0	0	0	0	0.73	0.8	0	0.51
rna-XM_027289491.1	gene-LOC109139288	LOC109139288	sodium-dependent neutral amino acid transporter B(0)AT2-like, transcript variant X3	2.136	0.0477504	up	2.15	0.9	1.68	4.48	1.85	3.83	1.57667	3.38667
rna-XM_027279774.1	gene-eogt	eogt	EGF domain specific O-linked N-acetylglucosamine transferase, transcript variant X5	141.574	0.0478201	up	0	0	0	0.93	0	0.16	0	0.363333
rna-XM_019270588.2	gene-LOC109141161	LOC109141161	transmembrane protein 169, transcript variant X1	93.873	0.0478991	up	0	0	0	0.33	0	0.44	0	0.256667
rna-XM_027286059.1	gene-LOC104938823	LOC104938823	protein SON, transcript variant X5	97.665	0.0479053	up	0	0	0	0	0.33	0.2	0	0.176667
rna-XM_027283144.1	gene-dclk2	dclk2	doublecortin like kinase 2, transcript variant X2	106.765	0.0479891	up	0	0	0	0	0.3	0.12	0	0.14
rna-XM_019269703.2	gene-pold4	pold4	DNA polymerase delta 4, accessory subunit, transcript variant X2	132.116	0.0480576	up	0	0	0	4.75	0	0.96	0	1.90333
rna-XM_019259912.2	gene-agtpbp1	agtpbp1	ATP/GTP binding protein 1, transcript variant X1	118.212	0.0480956	up	0	0	0	0	0.32	0.09	0	0.136667
rna-XM_019263392.2	gene-haao	haao	3-hydroxyanthranilate 3,4-dioxygenase, transcript variant X1	93.358	0.04824	up	0	0	0	0	0.88	1.16	0	0.68
rna-XM_010753573.3	gene-LOC104937361	LOC104937361	eyes absent homolog 3, transcript variant X1	97.502	0.0482895	up	0	0	0	0.23	0.2	0	0	0.143333
rna-XM_019256729.2	gene-camsap2	camsap2	calmodulin regulated spectrin associated protein family member 2, transcript variant X6	97.136	0.0482917	up	0	0	0	0.15	0.15	0	0	0.1
rna-XM_019267185.2	gene-LOC109140397	LOC109140397	anionic trypsin-1	24.309	0.0483086	up	0.28	0.44	2.24	1.05	1.07	70.24	0.986667	24.12
rna-XR_003462458.1	gene-taf1b	taf1b	TATA-box binding protein associated factor, RNA polymerase I subunit B, transcript variant X2	98.635	0.0485349	up	0	0	0	0.55	0.36	0	0	0.303333
rna-XM_019272054.2	gene-grid2ip	grid2ip	Grid2 interacting protein, transcript variant X5	93.163	0.0485845	up	0	0	0	0.19	0	0.11	0	0.1
rna-XM_019279003.2	gene-furin	furin	furin, paired basic amino acid cleaving enzyme, transcript variant X2	92.465	0.0486009	up	0	0	0	0	0.17	0.25	0	0.14
rna-XM_027278998.1	gene-eif4enif1	eif4enif1	eukaryotic translation initiation factor 4E nuclear import factor 1, transcript variant X2	97.557	0.0486063	up	0	0	0	0	0.23	0.45	0	0.226667
rna-XM_019262889.2	gene-cxiih17orf53	cxiih17orf53	chromosome XII C17orf53 homolog, transcript variant X1	100.62	0.0486464	up	0	0	0	0.38	0.68	0	0	0.353333
rna-XM_027280064.1	gene-sucnr1	sucnr1	succinate receptor 1, transcript variant X3	88.799	0.0490014	up	0	0	0	0	0.92	0.75	0	0.556667
rna-XM_019271696.2	gene-LOC104934758	LOC104934758	growth factor receptor-bound protein 10, transcript variant X2	91.771	0.049113	up	0	0	0	0.2	0	0.11	0	0.103333
rna-XM_027279511.1	gene-birc6	birc6	baculoviral IAP repeat containing 6, transcript variant X6	2.401	0.0491859	up	0.61	0.28	1.14	2.07	1.88	0.98	0.676667	1.64333
rna-XM_027290395.1	gene-dab1	dab1	DAB1, reelin adaptor protein, transcript variant X12	108.755	0.0492109	up	0	0	0	0.12	0	0.42	0	0.18
rna-XM_019257468.2	gene-fam117b	fam117b	family with sequence similarity 117 member B, transcript variant X1	88.365	0.0494416	up	0	0	0	0	0.25	0.17	0	0.14
rna-XM_027286432.1	gene-cep85	cep85	centrosomal protein 85, transcript variant X2	1.602	0.0494553	up	3.27	4.93	2.29	5.65	6.32	4.88	3.49667	5.61667
rna-XM_019253227.2	gene-LOC104925715	LOC104925715	coagulation factor X, transcript variant X3	92.05	0.0494753	up	0	0	0	0.51	0.65	0	0	0.386667
rna-XM_010732415.3	gene-LOC104920225	LOC104920225	chymotrypsin-C-like, transcript variant X2	941.353	0.0495159	up	0	0	0	0	0.34	27.57	0	9.30333
rna-XM_010743726.3	gene-col4a3bp	col4a3bp	collagen type IV alpha 3 binding protein, transcript variant X2	96.956	0.0497253	up	0	0	0	0.43	0	0.16	0	0.196667
rna-XM_027281083.1	gene-LOC104932290	LOC104932290	myopalladin, transcript variant X2	86.1	0.0498216	up	0	0	0	0	0.16	0.22	0	0.126667
rna-XM_027286373.1	gene-kirrel2	kirrel2	kirre like nephrin family adhesion molecule 2, transcript variant X1	2.481	0.049831	up	0.15	0.39	0.34	0.78	0.84	0.56	0.293333	0.726667
rna-XM_019272544.2	gene-znf711	znf711	zinc finger protein 711, transcript variant X2	108.504	0.0498668	up	0	0	0	0.36	0.12	0	0	0.16
rna-XM_019275086.2	gene-LOC104928538	LOC104928538	sorting nexin-14, transcript variant X1	0.001	8.45456e-07	down	3.21	2.74	2.64	0	0	0	2.86333	0
rna-XM_010750547.3	gene-LOC104934801	LOC104934801	actin-related protein 2/3 complex subunit 5	0.002	3.81169e-05	down	193.87	115.94	173.86	0.79	0	0	161.223	0.263333
rna-XM_027274712.1	gene-inf2	inf2	inverted formin, FH2 and WH2 domain containing, transcript variant X2	0	5.29124e-05	down	9.88	15.89	27.42	0	0	0	17.73	0
rna-XM_027279515.1	gene-birc6	birc6	baculoviral IAP repeat containing 6, transcript variant X7	0.001	6.99973e-05	down	0.46	0.4	0.7	0	0	0	0.52	0
rna-XM_010745511.3	gene-LOC104930657	LOC104930657	inactive carboxypeptidase-like protein X2, transcript variant X3	0.001	7.11368e-05	down	3.02	2.1	1.44	0	0	0	2.18667	0
rna-XM_019257548.2	gene-LOC104926156	LOC104926156	phosphatidate phosphatase LPIN2, transcript variant X7	0.001	8.21525e-05	down	0.89	1.43	1.28	0	0	0	1.2	0
rna-XM_019260046.2	gene-LOC104939522	LOC104939522	CSC1-like protein 2, transcript variant X2	0.348	0.000117589	down	3.89	2.91	3.01	1.14	1.06	1.23	3.27	1.14333
rna-XM_019256598.2	gene-rap1gap2	rap1gap2	RAP1 GTPase activating protein 2, transcript variant X8	0.004	0.000136252	down	0.39	0.5	0.43	0	0	0	0.44	0
rna-XM_010739807.3	gene-amotl2	amotl2	angiomotin like 2, transcript variant X1	0.005	0.000253209	down	0.58	1.04	0.72	0	0	0.01	0.78	0.00333333
rna-XM_019256485.2	gene-zbtb46	zbtb46	zinc finger and BTB domain containing 46, transcript variant X2	0.001	0.000264527	down	1.44	0.64	1.23	0	0	0	1.10333	0
rna-XM_010739644.3	gene-zfp36l2	zfp36l2	ZFP36 ring finger protein like 2	0.631	0.000272805	down	44.75	48.45	48.95	28.96	32.82	28.25	47.3833	30.01
rna-XM_027283113.1	gene-LOC104921560	LOC104921560	perforin-1, transcript variant X4	0.001	0.000281867	down	2.03	3.69	6.14	0	0	0	3.95333	0
rna-XM_010750936.3	gene-LOC104935137	LOC104935137	prostaglandin E2 receptor EP4 subtype	0.497	0.000318449	down	17.95	22	21.9	8.78	10.52	11.55	20.6167	10.2833
rna-XM_010733746.3	gene-LOC104921265	LOC104921265	regulator of G-protein signaling 13	0.583	0.000345492	down	207.57	273.34	249.83	138.49	146.65	144.46	243.58	143.2
rna-XM_027288123.1	gene-frem1	frem1	FRAS1 related extracellular matrix 1, transcript variant X3	0.001	0.000419777	down	0.32	0.8	0.84	0	0	0	0.653333	0
rna-XM_019253098.2	gene-LOC104933049	LOC104933049	beta-2 adrenergic receptor, transcript variant X1	0.466	0.000467077	down	3.4	3.9	4.32	1.86	1.86	1.72	3.87333	1.81333
rna-XM_027285211.1	gene-anapc2	anapc2	anaphase promoting complex subunit 2, transcript variant X1	0.001	0.000542278	down	4.81	3.54	1.05	0	0	0	3.13333	0
rna-XM_010733955.3	gene-LOC104921431	LOC104921431	tumor protein p53-inducible nuclear protein 2	0.538	0.000544195	down	30.61	33.91	37.19	20.25	19.83	15.14	33.9033	18.4067
rna-XM_010740176.3	gene-LOC104926341	LOC104926341	C-X-C chemokine receptor type 4	0.494	0.000650582	down	172.02	231.55	256.06	113.03	96.32	117.99	219.877	109.113
rna-XM_010735214.3	gene-cxivh11orf96	cxivh11orf96	chromosome XIV C11orf96 homolog	0.316	0.000669346	down	100.21	154.72	221.72	49.61	55.65	46.15	158.883	50.47
rna-XM_019273775.2	gene-LOC104928638	LOC104928638	homeodomain-interacting protein kinase 1, transcript variant X1	0.002	0.000689108	down	0.67	0.47	0.54	0	0	0	0.56	0
rna-XM_019278125.2	gene-kiaa0100	kiaa0100	KIAA0100 ortholog, transcript variant X8	0.001	0.000703015	down	0.62	1	0.26	0	0	0	0.626667	0
rna-XM_010747193.3	gene-plbd1	plbd1	phospholipase B domain containing 1	0.661	0.000754766	down	16.75	18.42	19.63	12.27	12.38	11.75	18.2667	12.1333
rna-XM_010755828.3	gene-sla2	sla2	Src like adaptor 2	0.512	0.000907733	down	61.01	72.12	75.49	28.09	39.41	40	69.54	35.8333
rna-XM_027277072.1	gene-LOC104928143	LOC104928143	ankyrin repeat and SOCS box protein 3, transcript variant X2	0.001	0.000982078	down	4.6	0.96	2.77	0	0	0	2.77667	0
rna-XM_027286604.1	gene-pi4kb	pi4kb	phosphatidylinositol 4-kinase beta, transcript variant X2	0.003	0.00105743	down	0.32	0.47	0.54	0	0	0	0.443333	0
rna-XM_027284515.1	gene-LOC109138582	LOC109138582	uncharacterized LOC109138582, transcript variant X3	0.473	0.00132659	down	10.87	11.65	9.88	5.64	5.02	4.81	10.8	5.15667
rna-XM_010732734.3	gene-itga11	itga11	integrin subunit alpha 11, transcript variant X1	0.003	0.00140235	down	0.63	0.56	0.29	0	0	0	0.493333	0
rna-XM_010749872.3	gene-bmpr1a	bmpr1a	bone morphogenetic protein receptor type 1A, transcript variant X2	0.003	0.00140299	down	0.97	0.32	0.65	0	0	0	0.646667	0
rna-XM_019254203.2	gene-LOC104925155	LOC104925155	pyruvate dehydrogenase (acetyl-transferring) kinase isozyme 2, mitochondrial-like	0.613	0.00144995	down	14.74	14.69	16.29	10.84	8.41	8.97	15.24	9.40667
rna-XM_019278661.2	gene-LOC104937607	LOC104937607	CAP-Gly domain-containing linker protein 1, transcript variant X3	0.003	0.00154691	down	0.6	1.39	0.45	0	0	0	0.813333	0
rna-XM_019271403.2	gene-myocd	myocd	myocardin, transcript variant X6	0.002	0.00154736	down	0.84	0.21	0.65	0	0	0	0.566667	0
rna-XM_027288498.1	gene-LOC104931989	LOC104931989	neuron navigator 1, transcript variant X4	0.002	0.00157394	down	0.11	0.65	0.47	0	0	0	0.41	0
rna-XM_010732782.3	gene-polr3e	polr3e	RNA polymerase III subunit E, transcript variant X1	0.462	0.00160258	down	5.58	4.78	3.64	2.34	2.24	1.92	4.66667	2.16667
rna-XM_027289328.1	gene-bahcc1	bahcc1	BAH domain and coiled-coil containing 1, transcript variant X5	0.003	0.00163667	down	0.16	0.14	0.31	0	0	0	0.203333	0
rna-XM_019253820.2	gene-pla2g6	pla2g6	phospholipase A2 group VI, transcript variant X3	0.003	0.00165009	down	0.56	1.06	0.45	0	0	0	0.69	0
rna-XM_010747533.3	gene-LOC104932343	LOC104932343	serine/threonine-protein kinase SIK2	0.55	0.00168323	down	12.92	11.05	10.96	5.11	7.1	7.06	11.6433	6.42333
rna-XM_027274974.1	gene-nin	nin	ninein, transcript variant X1	0.003	0.00171651	down	0.23	0.44	0.42	0	0	0	0.363333	0
rna-XM_010748452.3	gene-LOC104933085	LOC104933085	nuclear receptor subfamily 1 group D member 2	0.605	0.00182734	down	27.36	22.64	30.91	17.05	15.07	17.08	26.97	16.4
rna-XM_019263439.2	gene-LOC104940258	LOC104940258	tetraspanin-9, transcript variant X3	0.003	0.00188104	down	0.17	0.36	0.63	0	0	0	0.386667	0
rna-XM_019261174.2	gene-LOC104932346	LOC104932346	amyloid-beta A4 protein, transcript variant X1	0.578	0.00193243	down	13.71	10.4	13.95	7.48	8.05	6.64	12.6867	7.39
rna-XR_003461543.1	gene-simc1	simc1	SUMO interacting motifs containing 1, transcript variant X4	0.004	0.00199329	down	0.58	0.63	0.78	0	0	0	0.663333	0
rna-XM_010742595.3	gene-filip1l	filip1l	filamin A interacting protein 1 like, transcript variant X2	0.571	0.00201195	down	29.88	42.44	44.76	23.33	23.91	19.87	39.0267	22.37
rna-XM_010730222.3	gene-LOC104918453	LOC104918453	chemokine XC receptor 1-like, transcript variant X1	0.606	0.00206736	down	37.16	38.66	28.81	23.18	19.31	21.44	34.8767	21.31
rna-XM_010729180.3	gene-cebpd	cebpd	CCAAT enhancer binding protein delta	0.571	0.00208978	down	61.82	66.04	91.78	42.26	40.15	44.04	73.2133	42.15
rna-XM_027290975.1	gene-ndufc1	ndufc1	NADH:ubiquinone oxidoreductase subunit C1, transcript variant X2	0.001	0.00212759	down	71.49	11.3	16.49	0	0	0	33.0933	0
rna-XM_027281173.1	gene-lrp4	lrp4	LDL receptor related protein 4, transcript variant X2	0.492	0.00213446	down	2.24	2.09	1.71	0.92	1.23	0.84	2.01333	0.996667
rna-XM_027284359.1	gene-snapc4	snapc4	small nuclear RNA activating complex polypeptide 4, transcript variant X3	0.048	0.0021739	down	3.87	5.77	4.62	0.01	0.3	0.36	4.75333	0.223333
rna-XM_027281568.1	gene-LOC104929376	LOC104929376	metallophosphoesterase MPPED2, transcript variant X1	0.004	0.00218084	down	0.38	0.43	0.7	0	0	0	0.503333	0
rna-XM_027280105.1	gene-gramd1b	gramd1b	GRAM domain containing 1B, transcript variant X14	0.004	0.00218117	down	0.2	0.24	0.3	0	0	0	0.246667	0
rna-XM_027286193.1	gene-ripor2	ripor2	RHO family interacting cell polarization regulator 2, transcript variant X3	0.002	0.00246167	down	0.28	0.23	1.04	0	0	0	0.516667	0
rna-XM_019272599.2	gene-ext2	ext2	exostosin glycosyltransferase 2, transcript variant X2	0.334	0.00286468	down	2.09	3.58	2.31	1	1.01	0.67	2.66	0.893333
rna-XM_019263090.2	gene-dusp8	dusp8	dual specificity phosphatase 8, transcript variant X4	0.004	0.00322758	down	0.46	0.38	0.16	0	0	0	0.333333	0
rna-XM_019261506.2	gene-tsen54	tsen54	tRNA splicing endonuclease subunit 54, transcript variant X2	0.005	0.00327787	down	1.64	1.12	0.77	0	0	0	1.17667	0
rna-XM_019253002.2	gene-LOC104940115	LOC104940115	dickkopf-related protein 2, transcript variant X1	0.408	0.00342701	down	5.37	5.8	6.13	3.07	1.88	2.16	5.76667	2.37
rna-XM_027279779.1	gene-cvih1orf159	cvih1orf159	chromosome VI C1orf159 homolog, transcript variant X2	0.005	0.00344665	down	0.49	0.86	0.86	0	0	0	0.736667	0
rna-XM_019274326.2	gene-aktip	aktip	AKT interacting protein, transcript variant X1	0.305	0.003451	down	4.59	3.05	3.12	1.43	1.07	0.81	3.58667	1.10333
rna-XM_019256769.2	gene-LOC104926929	LOC104926929	uncharacterized LOC104926929, transcript variant X2	0.006	0.00346858	down	1.38	0.1	2.76	0	0	0.02	1.41333	0.00666667
rna-XM_010737901.3	gene-ankib1	ankib1	ankyrin repeat and IBR domain containing 1, transcript variant X3	0.313	0.00367723	down	2.74	1.61	1.66	0.9	0.57	0.43	2.00333	0.633333
rna-XM_027275355.1	gene-selenbp1	selenbp1	selenium binding protein 1, transcript variant X2	0.006	0.00369636	down	0.74	0.59	0.63	0	0	0	0.653333	0
rna-XM_010745494.3	gene-LOC104930634	LOC104930634	disks large homolog 5, transcript variant X2	0.594	0.00375382	down	2.39	2.39	2.15	1.13	1.5	1.49	2.31	1.37333
rna-XM_019269036.2	gene-LOC104928144	LOC104928144	ATP-binding cassette sub-family A member 5, transcript variant X2	0.523	0.00378728	down	2.7	2.99	3.57	1.98	1.24	1.63	3.08667	1.61667
rna-XM_027280730.1	gene-LOC104935453	LOC104935453	lissencephaly-1 homolog, transcript variant X2	0.004	0.00384325	down	0.21	0.61	0.17	0	0	0	0.33	0
rna-XM_010734350.3	gene-LOC104921727	LOC104921727	bromodomain testis-specific protein, transcript variant X4	0.005	0.0038944	down	0.28	0.2	0.6	0	0	0	0.36	0
rna-XM_010745836.3	gene-pik3r1	pik3r1	phosphoinositide-3-kinase regulatory subunit 1, transcript variant X2	0.659	0.00392335	down	10.96	13.25	15.15	8.1	9.37	8.53	13.12	8.66667
rna-XM_027280251.1	gene-LOC113746031	LOC113746031	rhomboid-related protein 4-like, transcript variant X1	0.002	0.00397523	down	0.34	3.36	1.33	0	0	0	1.67667	0
rna-XM_027280670.1	gene-capn5	capn5	calpain 5, transcript variant X1	0.5	0.00397582	down	21.24	16.12	16.06	11.88	7.12	7.91	17.8067	8.97
rna-XM_010752790.3	gene-LOC104936711	LOC104936711	uncharacterized LOC104936711, transcript variant X1	0.371	0.0040401	down	1.46	1.41	0.89	0.6	0.44	0.37	1.25333	0.47
rna-XM_027282818.1	gene-pcm1	pcm1	pericentriolar material 1, transcript variant X2	0.006	0.00405314	down	0.18	0.15	0.19	0	0	0	0.173333	0
rna-XM_027274779.1	gene-rab3gap2	rab3gap2	RAB3 GTPase activating non-catalytic protein subunit 2, transcript variant X2	0.065	0.00413924	down	0.15	0.95	0.69	0.05	0.03	0.04	0.596667	0.04
rna-XM_019270564.2	gene-micall1	micall1	MICAL like 1, transcript variant X2	0.005	0.00420318	down	0.17	0.27	0.52	0	0	0	0.32	0
rna-XM_027281189.1	gene-plekhg4	plekhg4	pleckstrin homology and RhoGEF domain containing G4, transcript variant X3	0.005	0.00437101	down	0.26	0.1	0.28	0	0	0	0.213333	0
rna-XM_010748103.3	gene-suv39h1	suv39h1	suppressor of variegation 3-9 homolog 1, transcript variant X2	0.005	0.00441934	down	0.27	0.32	0.83	0	0	0	0.473333	0
rna-XM_027272944.1	gene-LOC104940256	LOC104940256	UPF0606 protein KIAA1549, transcript variant X2	0.006	0.00445289	down	0.09	0.13	0.22	0	0	0	0.146667	0
rna-XM_019258337.2	gene-drg2	drg2	developmentally regulated GTP binding protein 2, transcript variant X2	0.246	0.00448203	down	6.69	6.01	2.58	1.43	1.03	1.33	5.09333	1.26333
rna-XM_027273680.1	gene-LOC104931671	LOC104931671	heterogeneous nuclear ribonucleoprotein L, transcript variant X2	0.004	0.00463152	down	0.88	0.23	1.22	0	0	0	0.776667	0
rna-XM_019261986.2	gene-LOC104928201	LOC104928201	disks large-associated protein 1, transcript variant X3	0.006	0.00478493	down	0.1	0.07	0.15	0	0	0	0.106667	0
rna-XM_019262421.2	gene-LOC104927811	LOC104927811	transcription factor SOX-6, transcript variant X8	0.006	0.00481804	down	0.27	0.1	0.19	0	0	0	0.186667	0
rna-XM_010739982.3	gene-sec62	sec62	SEC62 homolog, preprotein translocation factor, transcript variant X1	0.58	0.00482335	down	6.24	8.28	6.6	3.6	5.05	3.64	7.04	4.09667
rna-XM_010744240.3	gene-sugp1	sugp1	SURP and G-patch domain containing 1, transcript variant X2	0.266	0.00491855	down	2.25	2.2	1.64	0.65	0.34	0.63	2.03	0.54
rna-XM_010741613.3	gene-pck2	pck2	phosphoenolpyruvate carboxykinase 2, mitochondrial	0.277	0.00494477	down	2.76	1.99	1.22	0.71	0.41	0.54	1.99	0.553333
rna-XM_019272190.2	gene-LOC104931955	LOC104931955	rho guanine nucleotide exchange factor 25, transcript variant X3	0.63	0.00495471	down	7.74	6.79	7.08	4.69	3.92	5.07	7.20333	4.56
rna-XM_027288423.1	gene-mib1	mib1	mindbomb E3 ubiquitin protein ligase 1, transcript variant X3	0.004	0.00497006	down	0.51	0.12	0.16	0	0	0	0.263333	0
rna-XM_019254428.2	gene-clstn1	clstn1	calsyntenin 1, transcript variant X2	0.006	0.00500098	down	0.25	0.13	0.21	0	0	0	0.196667	0
rna-XM_019274919.2	gene-tmem131l	tmem131l	transmembrane 131 like, transcript variant X3	0.452	0.00517185	down	3.49	2.43	1.95	1.26	1.05	1.26	2.62333	1.19
rna-XM_027287275.1	gene-LOC104922577	LOC104922577	hypothetical protein, transcript variant X4	0.521	0.00530457	down	8.97	6.9	8.27	5.39	4.12	3.19	8.04667	4.23333
rna-XM_027286676.1	gene-LOC104934390	LOC104934390	RNA/RNP complex-1-interacting phosphatase, transcript variant X2	0.007	0.00533312	down	0.83	0.83	0.59	0	0	0	0.75	0
rna-XM_019272643.2	gene-LOC104928079	LOC104928079	ankyrin repeat and SAM domain-containing protein 1A, transcript variant X6	0.004	0.00542452	down	1.15	0.16	0.64	0	0	0	0.65	0
rna-XM_019267681.2	gene-znf366	znf366	zinc finger protein 366	0.612	0.00547491	down	10.95	13.53	9.33	6.64	6.27	7.84	11.27	6.91667
rna-XM_019259611.2	gene-LOC104922268	LOC104922268	calcium uptake protein 3, mitochondrial, transcript variant X11	0.007	0.00555488	down	0.3	0.5	0.31	0	0	0	0.37	0
rna-XM_019276422.2	gene-LOC104919081	LOC104919081	tripartite motif-containing protein 66, transcript variant X2	0.22	0.00559162	down	12.5	3.28	6.81	1.01	2.22	1.78	7.53	1.67
rna-XM_027287816.1	gene-LOC109139829	LOC109139829	Fc receptor-like protein 5, transcript variant X3	0.007	0.00562445	down	0.24	0.19	0.29	0	0	0	0.24	0
rna-XM_027286369.1	gene-LOC104940563	LOC104940563	tax1-binding protein 1 homolog A, transcript variant X2	0.007	0.0057414	down	0.25	0.15	0.27	0	0	0	0.223333	0
rna-XM_027274662.1	gene-LOC104920053	LOC104920053	TRAF2 and NCK-interacting protein kinase, transcript variant X3	0.004	0.00580377	down	0.42	0.21	0.05	0	0	0	0.226667	0
rna-XM_027283411.1	gene-LOC104926849	LOC104926849	MICAL-like protein 2, transcript variant X2	0.487	0.00585078	down	2.09	2.65	2.01	1.3	0.87	1.12	2.25	1.09667
rna-XM_027272197.1	gene-tmpo	tmpo	thymopoietin, transcript variant X3	0.006	0.00587651	down	0.75	0.32	0.23	0	0	0	0.433333	0
rna-XM_019276922.2	gene-LOC104924039	LOC104924039	liprin-beta-1, transcript variant X2	0.586	0.00608877	down	21.58	13.31	16.53	9.59	10.78	9.97	17.14	10.1133
rna-XM_027276103.1	gene-LOC113744918	LOC113744918	NADH dehydrogenase [ubiquinone] flavoprotein 1, mitochondrial-like	0.004	0.00611	down	4	0.88	5.83	0	0	0	3.57	0
rna-XM_019266827.2	gene-LOC104939945	LOC104939945	peripheral plasma membrane protein CASK, transcript variant X8	0.004	0.00621968	down	0.54	0.55	0.07	0	0	0	0.386667	0
rna-XM_027284621.1	gene-afdn	afdn	afadin, adherens junction formation factor, transcript variant X1	0.005	0.00622537	down	0.17	0.36	0.05	0	0	0	0.193333	0
rna-XM_027273580.1	gene-rad50	rad50	RAD50 double strand break repair protein, transcript variant X2	0.008	0.00627731	down	0.22	0.17	0.2	0	0	0	0.196667	0
rna-XM_010752451.3	gene-fbxo31	fbxo31	F-box protein 31, transcript variant X1	0.005	0.0065894	down	0.26	0.79	0.14	0	0	0	0.396667	0
rna-XM_027290981.1	gene-LOC104938538	LOC104938538	uncharacterized LOC104938538, transcript variant X1	0.652	0.00663492	down	6.27	5.41	6.23	4.17	3.91	3.66	5.97	3.91333
rna-XR_003462411.1	gene-LOC113745795	LOC113745795	uncharacterized LOC113745795	0.516	0.0066809	down	3.46	5.02	5.83	2.96	2.18	2.27	4.77	2.47
rna-XM_010734113.3	gene-LOC104921545	LOC104921545	neuronal pentraxin-1	0.652	0.00672455	down	11.16	16.45	15.51	9.81	9.5	8.9	14.3733	9.40333
rna-XM_010734347.3	gene-LOC104921727	LOC104921727	bromodomain testis-specific protein, transcript variant X1	0.007	0.00681705	down	0.4	0.2	0.14	0	0	0	0.246667	0
rna-XM_019263242.2	gene-znf410	znf410	zinc finger protein 410, transcript variant X1	0.291	0.00689957	down	6.62	5	2.95	1.9	1.63	0.75	4.85667	1.42667
rna-XM_010751230.3	gene-LOC104935398	LOC104935398	serine/threonine-protein kinase SAPK4	0.65	0.00692295	down	12.71	16.15	19.72	10.52	10.8	10.37	16.1933	10.5633
rna-XM_027285220.1	gene-LOC104932773	LOC104932773	transferrin receptor protein 1	0.609	0.00700965	down	7.42	8.7	9.66	4.39	6.59	4.78	8.59333	5.25333
rna-XR_797456.3	gene-ankrd44	ankrd44	ankyrin repeat domain 44, transcript variant X2	0.002	0.00710948	down	0.92	0	0.58	0	0	0	0.5	0
rna-XM_019272364.2	gene-LOC104921848	LOC104921848	anoctamin-8, transcript variant X1	0.008	0.00714157	down	0.11	0.16	0.09	0	0	0	0.12	0
rna-XM_010744350.3	gene-osbpl8	osbpl8	oxysterol binding protein like 8, transcript variant X3	0.389	0.00716584	down	0.91	1.81	1.73	0.46	0.56	0.71	1.48333	0.576667
rna-XR_003462150.1	gene-LOC113745451	LOC113745451	uncharacterized LOC113745451	0.641	0.00720409	down	608.42	820.97	879.38	571.77	478.03	607.43	769.59	552.41
rna-XM_027290845.1	gene-itga4	itga4	integrin subunit alpha 4, transcript variant X2	0.647	0.00721908	down	7.15	6.77	6.29	3.49	4.76	4.84	6.73667	4.36333
rna-XM_019258422.2	gene-LOC104930724	LOC104930724	polypyrimidine tract-binding protein 2, transcript variant X3	0.586	0.00723978	down	5.27	4.52	3.87	2.91	2.45	2.67	4.55333	2.67667
rna-XM_019267930.2	gene-LOC104930910	LOC104930910	EGF containing fibulin extracellular matrix protein 1, transcript variant X2	0.007	0.0072685	down	0.4	0.13	0.33	0	0	0	0.286667	0
rna-XM_027273394.1	gene-tspoap1	tspoap1	TSPO associated protein 1, transcript variant X4	0.005	0.0072988	down	0.13	0.05	0.29	0	0	0	0.156667	0
rna-XM_010738639.3	gene-mafb	mafb	MAF bZIP transcription factor B	0.637	0.00734123	down	58.28	55.04	52.85	37.48	42.41	26.71	55.39	35.5333
rna-XM_010737356.3	gene-ccnl1	ccnl1	cyclin L1, transcript variant X2	0.543	0.00749151	down	10.53	9.03	13.88	5.09	7.72	5.45	11.1467	6.08667
rna-XM_027287493.1	gene-LOC104932169	LOC104932169	membrane-spanning 4-domains subfamily A member 8, transcript variant X1	0.572	0.00756183	down	26.22	24.39	20.25	16.27	14.88	9.89	23.62	13.68
rna-XM_010742836.3	gene-filip1	filip1	filamin A interacting protein 1, transcript variant X1	0.367	0.00763912	down	1.51	1.49	2.17	0.41	0.84	0.64	1.72333	0.63
rna-XM_019270194.2	gene-prr18	prr18	proline rich 18	0.478	0.00768827	down	4.74	8.55	7.11	2.73	3.86	3.18	6.8	3.25667
rna-XM_027277664.1	gene-mpdz	mpdz	multiple PDZ domain crumbs cell polarity complex component, transcript variant X7	0.021	0.00771325	down	0.2	0.24	0.11	0.01	0	0	0.183333	0.00333333
rna-XM_027287027.1	gene-ptpru	ptpru	protein tyrosine phosphatase, receptor type U, transcript variant X2	0.009	0.00773771	down	0.15	0.19	0.1	0	0	0	0.146667	0
rna-XM_019269020.2	gene-LOC104928151	LOC104928151	dual specificity mitogen-activated protein kinase kinase 6, transcript variant X3	0.438	0.00781668	down	0.76	1.09	0.99	0.31	0.5	0.43	0.946667	0.413333
rna-XM_010732507.3	gene-LOC104920286	LOC104920286	rab5 GDP/GTP exchange factor, transcript variant X1	0.655	0.00784381	down	11.03	16.81	13.4	9.16	9.33	8.61	13.7467	9.03333
rna-XM_019263536.2	gene-kank1	kank1	KN motif and ankyrin repeat domains 1	0.006	0.00789707	down	0.09	0.14	0.4	0	0	0	0.21	0
rna-XM_010735624.3	gene-dync1li2	dync1li2	dynein cytoplasmic 1 light intermediate chain 2, transcript variant X2	0.464	0.00795772	down	1.51	2.62	2.45	0.97	1.23	0.86	2.19333	1.02
rna-XM_027289856.1	gene-LOC109142720	LOC109142720	breast cancer anti-estrogen resistance protein 3 homolog, transcript variant X2	0.009	0.00804006	down	0.24	0.13	0.16	0	0	0	0.176667	0
rna-XM_019276635.2	gene-LOC104923718	LOC104923718	SLIT-ROBO Rho GTPase-activating protein 1, transcript variant X2	0.007	0.00809645	down	0.11	0.3	0.07	0	0	0	0.16	0
rna-XR_003463363.1	gene-LOC113747128	LOC113747128	uncharacterized LOC113747128, transcript variant X2	0.009	0.00809919	down	0.08	0.06	0.13	0	0	0	0.09	0
rna-XM_027283984.1	gene-disp1	disp1	dispatched RND transporter family member 1, transcript variant X4	0.459	0.00840219	down	1.11	1.1	1.23	0.5	0.54	0.55	1.14667	0.53
rna-XM_027274553.1	gene-snx14	snx14	sorting nexin 14, transcript variant X2	0.009	0.00849874	down	0.14	0.33	0.22	0	0	0	0.23	0
rna-XM_027280296.1	gene-LOC113746045	LOC113746045	uncharacterized LOC113746045, transcript variant X2	0.571	0.00894029	down	6.55	7.4	8.93	4.29	4.13	4.73	7.62667	4.38333
rna-XM_019257523.2	gene-LOC104920353	LOC104920353	ubiquitin-associated protein 2, transcript variant X5	0.599	0.00929039	down	4.25	3.27	3.09	2.42	1.99	1.98	3.53667	2.13
rna-XM_010751423.3	gene-trip11	trip11	thyroid hormone receptor interactor 11	0.463	0.00936411	down	2.1	1.55	2.03	0.56	1.12	0.96	1.89333	0.88
rna-XM_019260412.2	gene-clasp1	clasp1	cytoplasmic linker associated protein 1, transcript variant X11	0.011	0.00942127	down	0.09	0.07	0.07	0	0	0	0.0766667	0
rna-XM_027291592.1	gene-LOC104931488	LOC104931488	zinc finger protein 513-like, transcript variant X1	0.442	0.00943834	down	5.83	6.43	8.95	3.98	1.84	3.57	7.07	3.13
rna-XM_019273010.2	gene-nars2	nars2	asparaginyl-tRNA synthetase 2, mitochondrial	0.441	0.00951147	down	7.45	8.16	8.84	4.27	2.17	4.4	8.15	3.61333
rna-XM_019254971.2	gene-kif2a	kif2a	kinesin family member 2A, transcript variant X3	0.009	0.00957142	down	0.38	0.18	0.16	0	0	0	0.24	0
rna-XM_010734424.3	gene-LOC104921782	LOC104921782	protein phosphatase 1 regulatory subunit 15A, transcript variant X1	0.628	0.00965468	down	33.54	30.29	31.74	15.39	20.22	24.65	31.8567	20.0867
rna-XM_010741270.3	gene-LOC104927238	LOC104927238	thrombomodulin	0.5	0.00969809	down	42.93	77.93	57.36	28.23	39.51	21.69	59.4067	29.81
rna-XM_027282066.1	gene-nedd4l	nedd4l	neural precursor cell expressed, developmentally down-regulated 4-like, E3 ubiquitin protein ligase, transcript variant X2	0.008	0.00980488	down	0.21	0.05	0.15	0	0	0	0.136667	0
rna-XM_027290208.1	gene-anapc4	anapc4	anaphase promoting complex subunit 4, transcript variant X2	0.011	0.0099341	down	0.24	0.19	0.35	0	0	0	0.26	0
rna-XM_010735699.3	gene-LOC104922773	LOC104922773	transcription factor SOX-4	0.553	0.00993635	down	3.84	4.9	4.86	3.2	2.59	1.77	4.53333	2.52
rna-XM_027282456.1	gene-rfx1	rfx1	regulatory factor X1, transcript variant X3	0.011	0.0101177	down	0.19	0.16	0.09	0	0	0	0.146667	0
rna-XM_019275471.2	gene-LOC104922864	LOC104922864	DNA-binding protein SATB1, transcript variant X3	0.009	0.0102098	down	0.36	0.15	0.1	0	0	0	0.203333	0
rna-XM_010745837.3	gene-pik3r1	pik3r1	phosphoinositide-3-kinase regulatory subunit 1, transcript variant X3	0.424	0.0103994	down	2.71	1.5	2.85	1.12	0.78	1.1	2.35333	1
rna-XM_019254944.2	gene-LOC104921293	LOC104921293	thrombospondin-4-B	0.055	0.0105323	down	0.28	1.23	0.13	0.04	0.02	0.03	0.546667	0.03
rna-XM_027291576.1	gene-LOC104931467	LOC104931467	semaphorin-5B, transcript variant X4	0.012	0.0108586	down	0.08	0.15	0.08	0	0	0	0.103333	0
rna-XM_019276005.2	gene-LOC104922815	LOC104922815	GDNF family receptor alpha-2	0.384	0.0109636	down	2.38	1.41	2.06	0.66	0.98	0.62	1.95	0.753333
rna-XM_027289598.1	gene-yipf1	yipf1	Yip1 domain family member 1, transcript variant X2	0.012	0.0113013	down	0.35	0.24	0.18	0	0	0	0.256667	0
rna-XM_019253973.2	gene-ephb3	ephb3	EPH receptor B3, transcript variant X9	0.011	0.0113842	down	0.05	0.07	0.14	0	0	0	0.0866667	0
rna-XM_010741269.3	gene-LOC104927237	LOC104927237	thrombomodulin-like	0.56	0.0114656	down	33.2	49.98	62.36	26.58	32.51	22.88	48.5133	27.3233
rna-XM_027290960.1	gene-cnot11	cnot11	CCR4-NOT transcription complex subunit 11, transcript variant X1	0.552	0.0114815	down	4.67	5.13	4.82	2.4	2.89	2.84	4.87333	2.71
rna-XM_027279783.1	gene-magi1	magi1	membrane associated guanylate kinase, WW and PDZ domain containing 1, transcript variant X3	0.01	0.0115104	down	0.06	0.07	0.2	0	0	0	0.11	0
rna-XM_010737059.3	gene-LOC104923868	LOC104923868	V-type proton ATPase subunit S1	0.652	0.0116676	down	34.22	50.76	35.56	23.09	26.45	29.22	40.18	26.2533
rna-XM_027278482.1	gene-LOC104919183	LOC104919183	glycerophosphodiester phosphodiesterase domain-containing protein 5, transcript variant X4	0.01	0.0117705	down	0.15	0.55	0.35	0	0	0	0.35	0
rna-XM_019276933.2	gene-LOC109142615	LOC109142615	cryptochrome-1	0.564	0.011835	down	2.75	2.79	2.83	1.68	1.3	1.75	2.79	1.57667
rna-XM_027284371.1	gene-LOC104939981	LOC104939981	coiled-coil domain-containing protein 180, transcript variant X13	0.012	0.0119827	down	0.1	0.23	0.09	0	0	0	0.14	0
rna-XM_027285876.1	gene-LOC113747166	LOC113747166	E3 ubiquitin/ISG15 ligase TRIM25-like	0.555	0.0121189	down	14.71	14.89	11.47	6.41	8	8.68	13.69	7.69667
rna-XM_027278335.1	gene-LOC104930015	LOC104930015	E3 ubiquitin-protein ligase pellino homolog 1, transcript variant X12	0.012	0.0123064	down	0.2	0.09	0.09	0	0	0	0.126667	0
rna-XM_027287996.1	gene-LOC104932933	LOC104932933	up-regulator of cell proliferation-like	0.388	0.0124481	down	2.37	3.84	1.22	0.84	1.04	1	2.47667	0.96
rna-XM_027290354.1	gene-vamp4	vamp4	vesicle associated membrane protein 4, transcript variant X1	0.014	0.012476	down	0.26	0.19	0.32	0	0	0	0.256667	0
rna-XM_019278830.2	gene-zmat5	zmat5	zinc finger matrin-type 5, transcript variant X7	0.009	0.0125872	down	0.34	1.39	0.36	0	0	0	0.696667	0
rna-XM_019278466.2	gene-LOC104937385	LOC104937385	nuclear receptor-interacting protein 2	0.631	0.01269	down	7.58	7.37	9.13	4.91	5.79	4.63	8.02667	5.11
rna-XM_010731004.3	gene-rasl11b	rasl11b	RAS like family 11 member B	0.422	0.0127156	down	3.19	4.5	4.33	1.91	1.51	1.68	4.00667	1.7
rna-XM_019258157.2	gene-LOC104918365	LOC104918365	protein FAM19A2, transcript variant X2	0.013	0.0128086	down	0.21	0.32	0.55	0	0	0	0.36	0
rna-XM_010734005.3	gene-tbc1d4	tbc1d4	TBC1 domain family member 4, transcript variant X5	0.618	0.0131271	down	1.88	1.71	1.9	1.37	0.96	1.07	1.83	1.13333
rna-XM_027284092.1	gene-LOC104930747	LOC104930747	protocadherin-1, transcript variant X2	0.497	0.0136306	down	2.23	2.87	3.25	1.87	1.21	1.09	2.78333	1.39
rna-XM_010733441.3	gene-gnb1l	gnb1l	G protein subunit beta 1 like, transcript variant X2	0.014	0.0136666	down	0.53	0.26	0.39	0	0	0	0.393333	0
rna-XM_027282870.1	gene-upf2	upf2	UPF2, regulator of nonsense mediated mRNA decay, transcript variant X2	0.258	0.0137058	down	1.47	1.2	1.58	0.58	0.13	0.39	1.41667	0.366667
rna-XM_027278210.1	gene-nfib	nfib	nuclear factor I B, transcript variant X4	0.011	0.0138138	down	0.1	0.13	0.03	0	0	0	0.0866667	0
rna-XM_019262354.2	gene-pcdh17	pcdh17	protocadherin 17, transcript variant X3	0.302	0.0139735	down	0.44	1.12	1.8	0.37	0.29	0.36	1.12	0.34
rna-XM_010742899.3	gene-ddit4	ddit4	DNA damage inducible transcript 4, transcript variant X1	0.513	0.0141878	down	11.42	13.57	17.51	10	5.1	6.85	14.1667	7.31667
rna-XM_019256749.2	gene-LOC104926447	LOC104926447	uncharacterized LOC104926447, transcript variant X2	0.592	0.0144278	down	1.85	1.58	2.07	0.94	1.41	0.92	1.83333	1.09
rna-XM_019272352.2	gene-LOC104921837	LOC104921837	interferon-induced protein 44, transcript variant X3	0.433	0.0146771	down	24.19	19.47	10.35	10.4	7.88	5.35	18.0033	7.87667
rna-XM_027278647.1	gene-LOC104937030	LOC104937030	leukemia inhibitory factor receptor, transcript variant X3	0.006	0.0146963	down	0	0.91	0.2	0	0	0	0.37	0
rna-XM_027285317.1	gene-col18a1	col18a1	collagen type XVIII alpha 1 chain, transcript variant X5	0.027	0.0150426	down	0.12	0.03	0.01	0	0	0	0.0533333	0
rna-XM_027279116.1	gene-LOC104928542	LOC104928542	collagen alpha-1(XII) chain, transcript variant X7	0.007	0.0151372	down	0.04	0.02	0.17	0	0	0	0.0766667	0
rna-XM_027287630.1	gene-LOC109139696	LOC109139696	putative selection and upkeep of intraepithelial T-cells protein 1 homolog, transcript variant X3	0.009	0.015236	down	1.62	0.23	0.4	0	0	0	0.75	0
rna-XM_027274739.1	gene-fermt2	fermt2	fermitin family member 2, transcript variant X3	0.654	0.0152891	down	3.62	3.77	4.04	2.97	2.58	1.95	3.81	2.5
rna-XM_027272918.1	gene-znf469	znf469	zinc finger protein 469, transcript variant X2	0.022	0.0153198	down	0.04	0.04	0.53	0	0.01	0	0.203333	0.00333333
rna-XM_027288034.1	gene-LOC109142944	LOC109142944	low affinity immunoglobulin gamma Fc region receptor II, transcript variant X3	0.012	0.0154332	down	1.03	0.24	0.46	0	0	0	0.576667	0
rna-XM_010754144.3	gene-LOC104937829	LOC104937829	syndecan-2, transcript variant X1	0.581	0.0155366	down	35.28	51.17	33.08	17.18	29.15	23.24	39.8433	23.19
rna-XM_010751871.3	gene-LOC104935954	LOC104935954	regulator of G-protein signaling 21	0.458	0.0155764	down	9.68	17.28	24.27	7.49	9.69	6.46	17.0767	7.88
rna-XM_027273323.1	gene-srrt	srrt	serrate, RNA effector molecule, transcript variant X1	0.026	0.0156073	down	3.49	5.93	0.41	0	0	0.24	3.27667	0.08
rna-XM_019260893.2	gene-LOC104936228	LOC104936228	endothelial PAS domain-containing protein 1, transcript variant X1	0.633	0.0156099	down	3.75	6.12	5.44	3.66	3.14	2.91	5.10333	3.23667
rna-XM_019255433.2	gene-LOC104933516	LOC104933516	vacuole membrane protein 1, transcript variant X2	0.658	0.0157439	down	9.62	13.19	8.54	6.4	7.97	6.34	10.45	6.90333
rna-XM_019253078.2	gene-mecom	mecom	MDS1 and EVI1 complex locus, transcript variant X7	0.017	0.0157934	down	0.05	0.07	0.09	0	0	0	0.07	0
rna-XM_027289769.1	gene-LOC104938513	LOC104938513	contactin-associated protein-like 4, transcript variant X1	0.224	0.0160164	down	0.22	0.11	0.22	0.03	0.05	0.05	0.183333	0.0433333
rna-XM_027278239.1	gene-LOC104919548	LOC104919548	ankyrin-3, transcript variant X5	0.017	0.016032	down	0.02	0.03	0.03	0	0	0	0.0266667	0
rna-XM_019262825.2	gene-wnk4	wnk4	WNK lysine deficient protein kinase 4, transcript variant X1	0.006	0.0162313	down	1.39	0.64	0	0	0.01	0	0.676667	0.00333333
rna-XM_027286869.1	gene-LOC104927578	LOC104927578	pre-B-cell leukemia transcription factor-interacting protein 1, transcript variant X5	0.591	0.0163822	down	2.29	1.86	2.06	1.08	1.48	1.12	2.07	1.22667
rna-XM_010733514.3	gene-LOC104921072	LOC104921072	ras-GEF domain-containing family member 1B-B	0.509	0.0164313	down	9.92	16.61	22.96	9.75	6.81	8.65	16.4967	8.40333
rna-XM_010740203.3	gene-LOC104926360	LOC104926360	ADP-ribosylation factor-like protein 5B	0.611	0.0167385	down	46.76	76.84	55.19	29.58	44.98	35.18	59.5967	36.58
rna-XM_010737156.3	gene-bcl6b	bcl6b	BCL6B, transcription repressor	0.376	0.0167503	down	4.1	3.01	5.45	0.91	2.47	1.38	4.18667	1.58667
rna-XM_027279681.1	gene-arhgef3	arhgef3	Rho guanine nucleotide exchange factor 3, transcript variant X2	0.649	0.0167956	down	1.99	1.97	1.95	1.29	1.28	1.29	1.97	1.28667
rna-XM_027288087.1	gene-LOC104925006	LOC104925006	calcium/calmodulin-dependent protein kinase type II delta chain, transcript variant X24	0.605	0.0170572	down	2.97	3.45	2.92	1.69	1.77	2.2	3.11333	1.88667
rna-XM_010746365.3	gene-mgp	mgp	matrix Gla protein, transcript variant X1	0.333	0.0170718	down	4.44	4.19	6.75	1.17	2.3	1.69	5.12667	1.72
rna-XM_010739528.3	gene-sap130	sap130	Sin3A associated protein 130, transcript variant X1	0.519	0.0170912	down	4.49	3.11	4.98	1.84	3.07	1.67	4.19333	2.19333
rna-XM_019268827.2	gene-trip6	trip6	thyroid hormone receptor interactor 6, transcript variant X4	0.634	0.0171862	down	3.48	3.28	2.83	2.29	2.19	1.63	3.19667	2.03667
rna-XM_019279123.2	gene-dnase2	dnase2	deoxyribonuclease 2, lysosomal, transcript variant X1	0.557	0.0174383	down	16.65	12.66	9.29	9.07	5.83	6.79	12.8667	7.23
rna-XM_027286677.1	gene-LOC104930573	LOC104930573	uncharacterized LOC104930573, transcript variant X1	0.377	0.0175133	down	23.04	88.88	61.35	25.32	18.78	21.62	57.7567	21.9067
rna-XM_010735900.3	gene-noct	noct	nocturnin, transcript variant X1	0.303	0.0176088	down	0.9	2.01	1.43	0.57	0.22	0.53	1.44667	0.44
rna-XM_019272167.2	gene-dennd1a	dennd1a	DENN domain containing 1A, transcript variant X2	0.607	0.0177639	down	4.1	5.98	5.11	3.41	2.22	3.58	5.06333	3.07
rna-XM_010734254.3	gene-polb	polb	DNA polymerase beta	0.341	0.0178528	down	2.69	4.15	6.61	2.29	0.84	1.47	4.48333	1.53333
rna-XM_010741455.3	gene-chga	chga	chromogranin A	0.157	0.0178559	down	1.03	1.8	0.36	0.15	0.18	0.16	1.06333	0.163333
rna-XM_019254494.2	gene-LOC104931613	LOC104931613	unconventional myosin-X-like, transcript variant X1	0.005	0.0179641	down	0.31	0.1	0.01	0	0	0	0.14	0
rna-XM_027281785.1	gene-myo18b	myo18b	myosin XVIIIB, transcript variant X3	0.019	0.0181834	down	0.04	0.04	0.08	0	0	0	0.0533333	0
rna-XM_010752511.3	gene-LOC104936474	LOC104936474	homeodomain-interacting protein kinase 3-like	0.051	0.0182213	down	0.04	3.62	1.98	0.12	0.12	0.05	1.88	0.0966667
rna-XM_027276355.1	gene-LOC104939703	LOC104939703	SH3 domain-binding protein 4, transcript variant X3	0.02	0.018229	down	0.09	0.07	0.12	0	0	0	0.0933333	0
rna-XM_027291000.1	gene-gorasp2	gorasp2	golgi reassembly stacking protein 2, transcript variant X2	0.021	0.0194853	down	0.13	0.11	0.08	0	0	0	0.106667	0
rna-XM_010751974.3	gene-rasgrp3	rasgrp3	RAS guanyl releasing protein 3, transcript variant X1	0.584	0.0199137	down	2.19	3.11	2.51	1.8	1.64	1.14	2.60333	1.52667
rna-XM_010735884.3	gene-LOC104922922	LOC104922922	protein shisa-8, transcript variant X2	0.022	0.0201593	down	0.05	0.04	0.03	0	0	0	0.04	0
rna-XM_027286532.1	gene-macf1	macf1	microtubule-actin crosslinking factor 1, transcript variant X14	0.019	0.0201736	down	0.01	0.08	0.45	0	0	0.01	0.18	0.00333333
rna-NM_001303376.1	gene-esr1	esr1	estrogen receptor 1	0.576	0.0204351	down	4.32	3.11	3.93	2.74	1.91	1.95	3.78667	2.2
rna-XM_019256448.2	gene-sept3	2022-09-03	septin 3, transcript variant X1	0.019	0.0205672	down	0.35	0.13	0.35	0	0	0	0.276667	0
rna-XM_010738250.3	gene-akt1	akt1	AKT serine/threonine kinase 1, transcript variant X2	0.424	0.0206667	down	1.19	1.52	1.12	0.42	0.7	0.5	1.27667	0.54
rna-XM_010743993.3	gene-LOC104929461	LOC104929461	apolipoprotein Eb	0.558	0.0207796	down	119.47	242.23	198.6	121.65	115.06	77.65	186.767	104.787
rna-XM_019275535.2	gene-add1	add1	adducin 1, transcript variant X8	0.033	0.0208142	down	0.71	0.94	3.25	0	0.16	0	1.63333	0.0533333
rna-XM_010755675.3	gene-LOC104939176	LOC104939176	nuclear receptor coactivator 3, transcript variant X1	0.496	0.0210463	down	2.48	1.67	3.14	1.69	0.91	1.03	2.43	1.21
rna-XM_010748150.3	gene-LOC104932832	LOC104932832	fin bud initiation factor	0.467	0.0211182	down	4.15	4.12	2.74	1.39	1.8	1.98	3.67	1.72333
rna-XM_010741182.3	gene-LOC104927162	LOC104927162	pyruvate dehydrogenase (acetyl-transferring) kinase isozyme 2, mitochondrial	0.389	0.0211233	down	4.3	8.88	11.69	4.7	1.92	3.08	8.29	3.23333
rna-XM_027277625.1	gene-fancc	fancc	FA complementation group C, transcript variant X7	0.023	0.0211308	down	0.06	0.11	0.08	0	0	0	0.0833333	0
rna-XM_019254367.2	gene-camkk1	camkk1	calcium/calmodulin dependent protein kinase kinase 1, transcript variant X3	0.522	0.0211876	down	1.12	1.61	1.26	0.55	0.62	0.91	1.33	0.693333
rna-XM_019273922.2	gene-LOC104932111	LOC104932111	ankyrin repeat domain-containing protein SOWAHB, transcript variant X1	0.644	0.021279	down	5.63	6.04	6.85	4.89	3.08	4.01	6.17333	3.99333
rna-XM_027289993.1	gene-LOC104940290	LOC104940290	receptor-type tyrosine-protein phosphatase F, transcript variant X11	0.02	0.0213689	down	0.05	0.03	0.08	0	0	0	0.0533333	0
rna-XM_010740413.3	gene-LOC104926538	LOC104926538	protein CYR61	0.444	0.021491	down	1.75	1.44	2.24	0.89	0.81	0.72	1.81	0.806667
rna-XM_027291262.1	gene-abi3bp	abi3bp	ABI family member 3 binding protein, transcript variant X6	0.017	0.0216551	down	0.17	0.04	0.15	0	0	0	0.12	0
rna-XM_019256248.2	gene-LOC104933668	LOC104933668	ras and Rab interactor 2, transcript variant X2	0.312	0.0217846	down	0.79	0.7	0.6	0.36	0.11	0.18	0.696667	0.216667
rna-XM_019277708.2	gene-exoc1	exoc1	exocyst complex component 1, transcript variant X1	0.029	0.0219635	down	0.66	4.46	0.79	0	0.17	0	1.97	0.0566667
rna-XM_027279922.1	gene-LOC104930668	LOC104930668	aldehyde dehydrogenase, dimeric NADP-preferring, transcript variant X2	0.023	0.0220281	down	0.11	0.19	0.21	0	0	0	0.17	0
rna-XM_010731632.3	gene-stk40	stk40	serine/threonine kinase 40, transcript variant X1	0.602	0.022041	down	4.16	6.08	3.7	3.49	2.7	2.23	4.64667	2.80667
rna-XM_019266945.2	gene-LOC104932059	LOC104932059	thyrotroph embryonic factor, transcript variant X3	0.618	0.0221654	down	9.16	10.86	14.57	9.24	6.45	5.77	11.53	7.15333
rna-XM_019279318.2	gene-LOC104938074	LOC104938074	zinc finger E-box-binding homeobox 2-like, transcript variant X3	0.36	0.0222398	down	1.23	1.99	3.54	1.1	0.9	0.45	2.25333	0.816667
rna-XM_027284101.1	gene-plekhg1	plekhg1	pleckstrin homology and RhoGEF domain containing G1, transcript variant X4	0.541	0.0223391	down	2.73	4.47	4.9	1.93	1.67	2.92	4.03333	2.17333
rna-XM_027289701.1	gene-LOC104932545	LOC104932545	chromodomain-helicase-DNA-binding protein 4, transcript variant X3	0.015	0.022619	down	0.18	0.01	0.88	0	0	0.01	0.356667	0.00333333
rna-XM_010744721.3	gene-LOC104930048	LOC104930048	ankyrin repeat and KH domain-containing protein 1, transcript variant X2	0.652	0.0227935	down	2.31	1.94	2.78	1.27	1.54	1.78	2.34333	1.53
rna-XM_027273534.1	gene-LOC113744340	LOC113744340	collagen alpha-1(XIII) chain-like, transcript variant X5	0.576	0.0227956	down	1.42	2.07	1.99	1.07	1.09	1	1.82667	1.05333
rna-XM_027290125.1	gene-LOC104918307	LOC104918307	histone-lysine N-methyltransferase 2C, transcript variant X4	0.548	0.0229447	down	1.34	1.64	1.24	0.92	0.46	0.94	1.40667	0.773333
rna-XM_019265777.2	gene-nsd1	nsd1	nuclear receptor binding SET domain protein 1, transcript variant X5	0.001	0.0229816	down	1.26	0	1.32	0	0	0	0.86	0
rna-XR_003462050.1	gene-LOC113745222	LOC113745222	uncharacterized LOC113745222	0.025	0.0230814	down	0.19	3.08	0.8	0	0.09	0	1.35667	0.03
rna-XM_010739207.3	gene-kcnk4	kcnk4	potassium two pore domain channel subfamily K member 4	0.589	0.0232554	down	2.5	3.01	4.77	2.24	1.98	1.85	3.42667	2.02333
rna-XM_027272410.1	gene-pphln1	pphln1	periphilin 1, transcript variant X7	0.023	0.0233752	down	0.19	0.09	0.21	0	0	0	0.163333	0
rna-XM_027290332.1	gene-ncl	ncl	nucleolin, transcript variant X2	0	0.0234635	down	91.2	0	28.42	0	0	0	39.8733	0
rna-XM_027281616.1	gene-cnst	cnst	consortin, connexin sorting protein, transcript variant X2	0.002	0.0235705	down	1.23	0	0.94	0	0	0	0.723333	0
rna-XM_010729837.3	gene-pbxip1	pbxip1	PBX homeobox interacting protein 1, transcript variant X4	0.64	0.0236734	down	3.01	2.43	2.97	1.9	1.53	1.97	2.80333	1.8
rna-XM_027290686.1	gene-itga6	itga6	integrin subunit alpha 6, transcript variant X2	0.592	0.0236967	down	4.46	4.43	2.95	2.19	2.93	1.93	3.94667	2.35
rna-XM_019258348.2	gene-rbbp6	rbbp6	RB binding protein 6, ubiquitin ligase, transcript variant X2	0.49	0.0237317	down	2.05	1.84	2.36	0.96	0.62	1.49	2.08333	1.02333
rna-XM_010735234.3	gene-eif4ebp3	eif4ebp3	eukaryotic translation initiation factor 4E binding protein 3	0.607	0.0239164	down	31.91	25.39	46.29	24.49	17.97	21.11	34.53	21.19
rna-XM_010734615.3	gene-LOC104921934	LOC104921934	Nuclear factor interleukin-3-regulated protein	0.001	0.0243968	down	0	1.95	1.63	0	0	0	1.19333	0
rna-XM_010756784.3	gene-brpf1	brpf1	bromodomain and PHD finger containing 1, transcript variant X4	0.344	0.0245181	down	1.91	1.32	2.01	0.91	0.23	0.67	1.74667	0.603333
rna-XM_027276599.1	gene-LOC104939280	LOC104939280	sodium/glucose cotransporter 4, transcript variant X2	0.026	0.0245194	down	0.16	0.1	0.19	0	0	0	0.15	0
rna-XM_010731222.3	gene-mybpc3	mybpc3	myosin binding protein C, cardiac, transcript variant X9	0.643	0.0246338	down	7.41	8.29	9.32	7.26	4.68	4.22	8.34	5.38667
rna-XM_010729602.3	gene-LOC104917997	LOC104917997	egl nine homolog 2	0.659	0.0246634	down	9.14	9.06	8.68	5.02	7.97	4.82	8.96	5.93667
rna-XM_019275039.2	gene-LOC104928537	LOC104928537	5'-nucleotidase	0.499	0.0249122	down	4.54	12.19	8.66	3.87	4.3	4.5	8.46333	4.22333
rna-XM_019273553.2	gene-LOC104928005	LOC104928005	GRAM domain-containing protein 2B, transcript variant X2	0.483	0.0249197	down	1.21	2.05	1.36	0.81	0.75	0.68	1.54	0.746667
rna-XM_027274715.1	gene-inf2	inf2	inverted formin, FH2 and WH2 domain containing, transcript variant X5	0.001	0.0249386	down	3.34	1.52	0	0	0	0	1.62	0
rna-XM_019265592.2	gene-dmxl2	dmxl2	Dmx like 2, transcript variant X6	0.003	0.0250874	down	0.55	0	0.16	0	0	0	0.236667	0
rna-XM_019253142.2	gene-LOC104932888	LOC104932888	uncharacterized LOC104932888, transcript variant X2	0.022	0.0252555	down	0.38	0.49	0	0	0	0	0.29	0
rna-XM_019276639.2	gene-LOC104923718	LOC104923718	SLIT-ROBO Rho GTPase-activating protein 1, transcript variant X6	0.021	0.0253191	down	0.06	0.04	0.16	0	0	0	0.0866667	0
rna-XM_027282935.1	gene-LOC104933918	LOC104933918	nucleoprotein TPR, transcript variant X1	0.001	0.0253265	down	0.7	1.13	0	0	0	0	0.61	0
rna-XM_010746444.3	gene-LOC104931439	LOC104931439	receptor-type tyrosine-protein phosphatase F, transcript variant X4	0.012	0.0253684	down	0.6	0	0.42	0.01	0	0	0.34	0.00333333
rna-XM_019256576.2	gene-rims2	rims2	regulating synaptic membrane exocytosis 2, transcript variant X26	0.026	0.0255518	down	0.02	0.05	0.03	0	0	0	0.0333333	0
rna-XM_010739991.3	gene-LOC104926188	LOC104926188	rho guanine nucleotide exchange factor 18, transcript variant X1	0.002	0.0257804	down	0	1.69	1.32	0	0	0	1.00333	0
rna-XM_019266944.2	gene-LOC104932059	LOC104932059	thyrotroph embryonic factor, transcript variant X2	0.415	0.0257932	down	0.83	1.5	1.83	0.37	0.58	0.77	1.38667	0.573333
rna-XM_027291285.1	gene-ramp1	ramp1	receptor activity modifying protein 1, transcript variant X1	0.028	0.0258133	down	0.14	0.08	0.08	0	0	0	0.1	0
rna-XM_010748694.3	gene-appl2	appl2	adaptor protein, phosphotyrosine interacting with PH domain and leucine zipper 2	0.001	0.0259308	down	0	2.99	1.08	0	0	0	1.35667	0
rna-XM_027283282.1	gene-LOC104930833	LOC104930833	bifunctional heparan sulfate N-deacetylase/N-sulfotransferase 4, transcript variant X2	0.403	0.0259432	down	1.3	0.88	1.35	0.31	0.45	0.67	1.17667	0.476667
rna-XM_027290930.1	gene-ppig	ppig	peptidylprolyl isomerase G, transcript variant X4	0.001	0.0259662	down	3.55	0	1.56	0	0	0	1.70333	0
rna-XM_019279320.2	gene-LOC104938074	LOC104938074	zinc finger E-box-binding homeobox 2-like, transcript variant X4	0.376	0.0260099	down	0.76	1.16	1.43	0.66	0.36	0.25	1.11667	0.423333
rna-XM_010735291.3	gene-LOC104922463	LOC104922463	protein prune homolog 2, transcript variant X2	0.216	0.0260937	down	0.89	2.93	0.9	0.3	0.54	0.18	1.57333	0.34
rna-XM_010741162.3	gene-LOC104927144	LOC104927144	ephrin type-A receptor 2, transcript variant X2	0.465	0.0261376	down	1.32	2.33	2.9	1.31	1.08	0.67	2.18333	1.02
rna-XM_010734981.3	gene-zbtb10	zbtb10	zinc finger and BTB domain containing 10, transcript variant X2	0.642	0.026345	down	2.58	2.45	3.12	1.69	1.49	2.07	2.71667	1.75
rna-XM_019255040.2	gene-nrip1	nrip1	nuclear receptor interacting protein 1, transcript variant X3	0.039	0.0263696	down	0.86	0.2	0.52	0	0.06	0	0.526667	0.02
rna-XM_027281360.1	gene-LOC113746306	LOC113746306	adhesion G-protein coupled receptor G5-like	0.365	0.0264051	down	2.17	3.3	2.57	0.72	1.4	0.83	2.68	0.983333
rna-XM_010749447.3	gene-LOC104933902	LOC104933902	acidic mammalian chitinase-like	0.014	0.0266441	down	0.45	0.45	0.03	0	0	0	0.31	0
rna-XM_027277341.1	gene-ercc6	ercc6	ERCC excision repair 6, chromatin remodeling factor, transcript variant X2	0.002	0.0267365	down	0.93	0	1.02	0	0	0	0.65	0
rna-XM_027273875.1	gene-kctd7	kctd7	potassium channel tetramerization domain containing 7, transcript variant X3	0.002	0.0267788	down	1.7	0	1.33	0	0	0	1.01	0
rna-XM_027277549.1	gene-LOC104922999	LOC104922999	rho guanine nucleotide exchange factor 28-like, transcript variant X3	0.03	0.0269589	down	0.03	0.03	0.04	0	0	0	0.0333333	0
rna-XM_027274277.1	gene-march6	2022-03-06	membrane associated ring-CH-type finger 6, transcript variant X1	0.002	0.0269805	down	1.27	0	1.76	0	0	0	1.01	0
rna-XM_027273105.1	gene-LOC104920490	LOC104920490	tyrosine-protein phosphatase non-receptor type 5, transcript variant X1	0.479	0.0270408	down	2.11	2.36	2.97	1.87	0.9	0.81	2.48	1.19333
rna-XM_027285061.1	gene-hgs	hgs	hepatocyte growth factor-regulated tyrosine kinase substrate, transcript variant X1	0.002	0.0271577	down	1.28	0	1.36	0	0	0	0.88	0
rna-XM_027283507.1	gene-ift27	ift27	intraflagellar transport 27, transcript variant X1	0.02	0.0272124	down	1.08	0.29	0.21	0	0	0	0.526667	0
rna-XM_010741258.3	gene-LOC104927227	LOC104927227	membrane progestin receptor beta	0.031	0.0273222	down	0.17	0.13	0.21	0	0	0	0.17	0
rna-XM_027273356.1	gene-pcnx3	pcnx3	pecanex 3, transcript variant X2	0.002	0.0276204	down	0	0.48	0.35	0	0	0	0.276667	0
rna-XM_019256998.2	gene-suclg1	suclg1	succinate-CoA ligase alpha subunit, transcript variant X2	0.002	0.0277367	down	3.53	0	3.78	0	0	0	2.43667	0
rna-XR_003462410.1	gene-LOC104931323	LOC104931323	peptidyl-prolyl cis-trans isomerase FKBP5, transcript variant X2	0.492	0.0277391	down	2.45	5.46	5.93	1.69	2.74	2.37	4.61333	2.26667
rna-XR_003461455.1	gene-LOC113744333	LOC113744333	uncharacterized LOC113744333	0.437	0.0277816	down	314.83	165.81	215.92	176.97	82	80.32	232.187	113.097
rna-XM_027281033.1	gene-LOC113746252	LOC113746252	tripartite motif-containing protein 16-like, transcript variant X2	0.542	0.027922	down	4.34	3.87	3.45	2.6	2.23	1.56	3.88667	2.13
rna-XM_027284011.1	gene-LOC104926784	LOC104926784	zinc finger protein 106, transcript variant X1	0.002	0.0279407	down	0	1.79	0.63	0	0	0	0.806667	0
rna-XM_010753250.3	gene-sncaip	sncaip	synuclein alpha interacting protein, transcript variant X1	0.597	0.02805	down	0.83	1.01	0.93	0.48	0.6	0.58	0.923333	0.553333
rna-XM_019260661.2	gene-rrad	rrad	RRAD, Ras related glycolysis inhibitor and calcium channel regulator	0.424	0.02821	down	15.94	49.57	26.21	11.67	18.28	9.09	30.5733	13.0133
rna-XM_027279772.1	gene-LOC104931338	LOC104931338	enolase	0	0.0282484	down	42.28	0	0	0	0	0.01	14.0933	0.00333333
rna-XM_027274499.1	gene-LOC104935283	LOC104935283	A-kinase anchor protein 9, transcript variant X2	0.002	0.0283593	down	0.23	0.57	0	0	0	0	0.266667	0
rna-XM_027282530.1	gene-bptf	bptf	bromodomain PHD finger transcription factor, transcript variant X3	0.568	0.0283938	down	1.29	1.01	1.47	0.81	0.89	0.46	1.25667	0.72
rna-XM_019261238.2	gene-LOC104922250	LOC104922250	sodium/potassium-transporting ATPase subunit alpha-3, transcript variant X3	0.001	0.02852	down	0	0	4.58	0	0	0	1.52667	0
rna-XM_010740703.3	gene-ahcyl1	ahcyl1	adenosylhomocysteinase like 1, transcript variant X1	0.177	0.0285541	down	0.18	0.63	1.09	0.13	0.14	0.06	0.633333	0.11
rna-XM_019277111.2	gene-zfyve28	zfyve28	zinc finger FYVE-type containing 28, transcript variant X3	0.015	0.0286239	down	0.24	0	0.36	0	0	0	0.2	0
rna-XM_010734119.3	gene-trim25	trim25	tripartite motif containing 25, transcript variant X3	0.591	0.0287263	down	3.57	2.36	3.23	2.16	1.28	2	3.05333	1.81333
rna-XM_010741674.3	gene-gse1	gse1	Gse1 coiled-coil protein, transcript variant X1	0.002	0.0287754	down	0	0.3	1.03	0	0	0	0.443333	0
rna-XM_019259043.2	gene-LOC104920998	LOC104920998	artemin, transcript variant X1	0.032	0.0287937	down	0.07	0.05	0.08	0	0	0	0.0666667	0
rna-XR_003463980.1	gene-mprip	mprip	myosin phosphatase Rho interacting protein, transcript variant X9	0.003	0.0287978	down	0.69	0	0.62	0	0	0	0.436667	0
rna-XM_027275983.1	gene-ogt	ogt	O-linked N-acetylglucosamine (GlcNAc) transferase, transcript variant X1	0.002	0.0288941	down	2.01	0.64	0	0	0	0	0.883333	0
rna-XM_019268180.2	gene-LOC104937120	LOC104937120	immunoglobulin kappa light chain-like, transcript variant X1	0.032	0.0289493	down	0.16	0.3	0.25	0	0	0	0.236667	0
rna-XM_027278274.1	gene-wdfy3	wdfy3	WD repeat and FYVE domain containing 3, transcript variant X3	0.003	0.0289994	down	0.35	0	0.2	0	0	0	0.183333	0
rna-XM_019278933.2	gene-zbed4	zbed4	zinc finger BED-type containing 4, transcript variant X2	0.013	0.0290581	down	0	1.69	2.39	0	0	0.05	1.36	0.0166667
rna-XM_010729517.3	gene-itih5	itih5	inter-alpha-trypsin inhibitor heavy chain family member 5	0.272	0.029063	down	0.81	0.79	0.89	0.41	0.17	0.1	0.83	0.226667
rna-XM_019265418.2	gene-LOC109139987	LOC109139987	small integral membrane protein 29, transcript variant X3	0.003	0.0290961	down	0	2.3	1.61	0	0	0	1.30333	0
rna-XM_027284138.1	gene-utrn	utrn	utrophin, transcript variant X2	0.002	0.0291021	down	0	0.64	0.2	0	0	0	0.28	0
rna-XM_010735772.3	gene-LOC104922834	LOC104922834	MAGUK p55 subfamily member 6, transcript variant X3	0.244	0.0293378	down	0.78	0.35	0.61	0.15	0.16	0.12	0.58	0.143333
rna-XM_019274859.2	gene-LOC104930157	LOC104930157	NFU1 iron-sulfur cluster scaffold homolog, mitochondrial, transcript variant X1	0.003	0.0294432	down	8.17	4.32	0	0	0	0	4.16333	0
rna-XR_003463851.1	gene-pip4k2c	pip4k2c	phosphatidylinositol-5-phosphate 4-kinase type 2 gamma, transcript variant X2	0.003	0.0296841	down	0	1.65	1.64	0	0	0	1.09667	0
rna-XM_010738283.3	gene-arhgap5	arhgap5	Rho GTPase activating protein 5, transcript variant X1	0.519	0.0297266	down	1.71	1.3	1.54	0.53	0.77	1.06	1.51667	0.786667
rna-XM_027288953.1	gene-ralbp1	ralbp1	ralA binding protein 1, transcript variant X2	0.003	0.0299211	down	0	1.07	0.92	0	0	0	0.663333	0
rna-XM_027290091.1	gene-clock	clock	clock circadian regulator, transcript variant X1	0.003	0.0299627	down	0	0.56	0.36	0	0	0	0.306667	0
rna-XM_027290716.1	gene-tmem50b	tmem50b	transmembrane protein 50B, transcript variant X3	0.002	0.0299967	down	3.55	1.51	0	0	0	0	1.68667	0
rna-XM_027273538.1	gene-LOC104939317	LOC104939317	follistatin-related protein 1, transcript variant X1	0.03	0.0300255	down	0.25	0.1	0.24	0	0	0	0.196667	0
rna-XM_010749090.3	gene-cmas	cmas	cytidine monophosphate N-acetylneuraminic acid synthetase	0.485	0.0301208	down	5.3	4.94	7.66	1.73	2.65	4.3	5.96667	2.89333
rna-XM_019264585.2	gene-LOC104924243	LOC104924243	core histone macro-H2A.1, transcript variant X3	0.033	0.0302833	down	0.24	0.12	0.19	0	0	0	0.183333	0
rna-XM_010748009.3	gene-LOC104932709	LOC104932709	transmembrane protein 184B-like, transcript variant X1	0.452	0.0304014	down	2.61	2.76	3.85	2.2	0.75	1.23	3.07333	1.39333
rna-XM_019255683.2	gene-LOC104919005	LOC104919005	RNA exonuclease 1 homolog, transcript variant X2	0.003	0.0304332	down	0	0.78	0.83	0	0	0	0.536667	0
rna-XM_027284908.1	gene-caskin1	caskin1	CASK interacting protein 1, transcript variant X9	0.304	0.0304928	down	0.25	0.27	0.54	0.06	0.12	0.15	0.353333	0.11
rna-XM_027289341.1	gene-LOC104931535	LOC104931535	adhesion G protein-coupled receptor L2, transcript variant X16	0.037	0.0304955	down	0.28	0.13	0.03	0.01	0	0	0.146667	0.00333333
rna-XM_019272084.2	gene-bahcc1	bahcc1	BAH domain and coiled-coil containing 1, transcript variant X7	0.003	0.0307158	down	0.25	0	0.37	0	0	0	0.206667	0
rna-XM_027278200.1	gene-LOC104930405	LOC104930405	protocadherin gamma-C5, transcript variant X6	0.017	0.0308385	down	0.01	0.1	0.12	0	0	0	0.0766667	0
rna-XM_027281987.1	gene-rapgef1	rapgef1	Rap guanine nucleotide exchange factor 1, transcript variant X5	0.003	0.0310426	down	0	1.2	0.48	0	0	0	0.56	0
rna-XM_027286821.1	gene-LOC104927464	LOC104927464	zinc finger protein 879, transcript variant X3	0.018	0.0311317	down	1.08	0	1.47	0	0	0.02	0.85	0.00666667
rna-XM_019256593.2	gene-zfpm2	zfpm2	zinc finger protein, FOG family member 2, transcript variant X1	0.054	0.0311672	down	0.01	0.11	0.08	0	0	0	0.0666667	0
rna-XM_027283149.1	gene-dclk2	dclk2	doublecortin like kinase 2, transcript variant X7	0.031	0.0312013	down	0.05	0.15	0.07	0	0	0	0.09	0
rna-XM_019266377.2	gene-runx3	runx3	runt related transcription factor 3, transcript variant X4	0.384	0.0312202	down	0.98	1.26	1.3	0.72	0.4	0.24	1.18	0.453333
rna-XM_027290431.1	gene-ect2	ect2	epithelial cell transforming 2, transcript variant X6	0.025	0.031367	down	0.02	0.08	0.1	0	0	0	0.0666667	0
rna-XM_027285756.1	gene-mtf2	mtf2	metal response element binding transcription factor 2, transcript variant X1	0.003	0.0314289	down	0	0.61	1.43	0	0	0	0.68	0
rna-XM_010730984.3	gene-c1qtnf7	c1qtnf7	C1q and TNF related 7	0.179	0.0314525	down	0.4	0.74	1.18	0.15	0.12	0.14	0.773333	0.136667
rna-XM_027273497.1	gene-LOC104934416	LOC104934416	lissencephaly-1 homolog B, transcript variant X3	0.312	0.0315227	down	1.57	1.46	1.03	0.44	0.26	0.56	1.35333	0.42
rna-XM_019267732.2	gene-LOC104927233	LOC104927233	kinesin-like protein KIF13B, transcript variant X1	0.003	0.0317624	down	0	0.27	0.61	0	0	0	0.293333	0
rna-XM_027274993.1	gene-clip1	clip1	CAP-Gly domain containing linker protein 1, transcript variant X8	0.004	0.0322955	down	0	0.37	0.32	0	0	0	0.23	0
rna-XM_019274882.2	gene-tlr3	tlr3	toll like receptor 3, transcript variant X5	0.004	0.0324995	down	0	1.07	0.63	0	0	0	0.566667	0
rna-XM_019254943.2	gene-LOC104917948	LOC104917948	tribbles homolog 2, transcript variant X2	0.538	0.032608	down	4.78	4.26	6.2	4.01	2.45	1.8	5.08	2.75333
rna-XM_027290553.1	gene-obscn	obscn	obscurin, cytoskeletal calmodulin and titin-interacting RhoGEF, transcript variant X10	0.246	0.0328136	down	0.06	0.24	0.14	0.04	0.05	0.02	0.146667	0.0366667
rna-XM_027274956.1	gene-rock2	rock2	Rho associated coiled-coil containing protein kinase 2, transcript variant X1	0.003	0.0328447	down	0.97	0	0.24	0	0	0	0.403333	0
rna-XM_027279634.1	gene-vps13d	vps13d	vacuolar protein sorting 13 homolog D, transcript variant X3	0.235	0.0328949	down	0.36	0.51	1.13	0.28	0.16	0.04	0.666667	0.16
rna-XM_019257820.2	gene-LOC104938293	LOC104938293	transcription initiation factor TFIID subunit 4, transcript variant X1	0.004	0.0330165	down	0	0.43	0.72	0	0	0	0.383333	0
rna-XM_019252887.2	gene-svil	svil	supervillin, transcript variant X4	0.038	0.0332705	down	0.02	0.03	0.02	0	0	0	0.0233333	0
rna-XM_010747443.3	gene-LOC104932266	LOC104932266	probable serine/threonine-protein kinase kinX, transcript variant X5	0.003	0.0332844	down	0.28	1.16	0	0	0	0	0.48	0
rna-XM_019262518.2	gene-prmt7	prmt7	protein arginine methyltransferase 7	0.452	0.0333338	down	3.96	1.7	4.55	1.3	1.8	1.56	3.40333	1.55333
rna-XM_027288941.1	gene-LOC104926546	LOC104926546	kin of IRRE-like protein 1, transcript variant X2	0.295	0.033511	down	2.18	2.62	3.36	1.6	0.61	0.21	2.72	0.806667
rna-XM_010733233.3	gene-gpcpd1	gpcpd1	glycerophosphocholine phosphodiesterase 1, transcript variant X4	0.415	0.0335448	down	5.32	1.94	4.76	1.52	1.13	2.36	4.00667	1.67
rna-XM_010737545.3	gene-fuom	fuom	fucose mutarotase, transcript variant X1	0.562	0.0336574	down	16.93	13.82	17	8.98	9.67	8.94	15.9167	9.19667
rna-XM_019270511.2	gene-LOC104930106	LOC104930106	nuclear factor of activated T-cells 5-like, transcript variant X1	0.529	0.0336828	down	3.21	3.56	3.52	1.01	1.7	2.72	3.43	1.81
rna-XM_019273155.2	gene-LOC109136602	LOC109136602	putative cyclin-dependent serine/threonine-protein kinase DDB_G0272797/DDB_G0274007, transcript variant X1	0.608	0.0337504	down	2.37	1.67	3	1.54	1.3	1.46	2.34667	1.43333
rna-XM_027289262.1	gene-gigyf2	gigyf2	GRB10 interacting GYF protein 2, transcript variant X3	0.004	0.0338376	down	0.56	0.57	0	0	0	0	0.376667	0
rna-XM_027274983.1	gene-LOC104929991	LOC104929991	DNA (cytosine-5)-methyltransferase 3A, transcript variant X1	0.017	0.0339147	down	0	0.42	0.14	0	0	0.01	0.186667	0.00333333
rna-XM_027279118.1	gene-LOC104928542	LOC104928542	collagen alpha-1(XII) chain, transcript variant X9	0.034	0.0339661	down	0.02	0.02	0.01	0	0	0	0.0166667	0
rna-XM_019273272.2	gene-cdk5	cdk5	cyclin dependent kinase 5	0.629	0.0340826	down	8.03	8.15	4.42	4.17	4.66	4.18	6.86667	4.33667
rna-XM_019272513.2	gene-mapre1	mapre1	microtubule associated protein RP/EB family member 1, transcript variant X1	0.004	0.0343242	down	0.32	0	0.82	0	0	0	0.38	0
rna-XM_019272485.2	gene-LOC109141579	LOC109141579	G protein-activated inward rectifier potassium channel 1-like	0.495	0.0345686	down	1.92	4.41	3.35	1.43	1.9	1.46	3.22667	1.59667
rna-XM_027283122.1	gene-arfip1	arfip1	ADP ribosylation factor interacting protein 1, transcript variant X3	0.004	0.0346433	down	0.51	0.96	0	0	0	0	0.49	0
rna-XM_019272283.2	gene-kti12	kti12	KTI12 chromatin associated homolog	0.004	0.0346878	down	4.07	0	2.5	0	0	0	2.19	0
rna-XM_027287301.1	gene-LOC104926093	LOC104926093	AT-rich interactive domain-containing protein 1A, transcript variant X1	0.002	0.0347068	down	0.13	0	1.15	0	0	0	0.426667	0
rna-XM_027288461.1	gene-LOC104931656	LOC104931656	cyclin-dependent kinase 17, transcript variant X5	0.028	0.0347127	down	0.2	0.04	0.06	0	0	0	0.1	0
rna-XM_027275760.1	gene-LOC104937042	LOC104937042	uncharacterized LOC104937042	0.005	0.0347166	down	0.68	0	0.59	0	0	0	0.423333	0
rna-XM_027285903.1	gene-LOC104920803	LOC104920803	nck-associated protein 5, transcript variant X1	0.004	0.0348039	down	0.36	0.26	0	0	0	0	0.206667	0
rna-XM_019257070.2	gene-LOC104937576	LOC104937576	protein NLRC3, transcript variant X5	0.005	0.0349393	down	0	0.64	0.47	0	0	0	0.37	0
rna-XM_027290809.1	gene-LOC104927782	LOC104927782	neurabin-1, transcript variant X3	0.481	0.0350953	down	2.39	1.47	3.6	1.26	1.57	0.79	2.48667	1.20667
rna-XM_019268376.2	gene-LOC104939122	LOC104939122	death-inducer obliterator 1, transcript variant X2	0.651	0.0351034	down	0.91	1.18	1.09	0.59	0.72	0.76	1.06	0.69
rna-XM_027285312.1	gene-LOC104935880	LOC104935880	caskin-2, transcript variant X6	0.004	0.0351654	down	0	0.66	0.31	0	0	0	0.323333	0
rna-XM_027272601.1	gene-c2cd5	c2cd5	C2 calcium dependent domain containing 5, transcript variant X2	0.005	0.035195	down	0	0.41	0.41	0	0	0	0.273333	0
rna-XM_010735030.3	gene-LOC104922249	LOC104922249	nectin-2, transcript variant X1	0.495	0.0352562	down	1.27	1.19	1.74	0.75	0.96	0.39	1.4	0.7
rna-XM_019255521.2	gene-LOC104925336	LOC104925336	R3H domain-containing protein 1, transcript variant X6	0.004	0.0352928	down	0.39	0.65	0	0	0	0	0.346667	0
rna-XM_027282855.1	gene-pkn1	pkn1	protein kinase N1, transcript variant X5	0.003	0.0354013	down	0	1.24	0.28	0	0	0	0.506667	0
rna-XM_010757136.3	gene-LOC104940513	LOC104940513	glycerophosphodiester phosphodiesterase domain-containing protein 5, transcript variant X2	0.035	0.0355221	down	0.1	0.04	0.13	0	0	0	0.09	0
rna-XM_019260842.2	gene-LOC104929884	LOC104929884	slit homolog 1 protein, transcript variant X3	0.005	0.035553	down	0	0.38	0.19	0	0	0	0.19	0
rna-XM_019254730.2	gene-numa1	numa1	nuclear mitotic apparatus protein 1, transcript variant X1	0.002	0.0355549	down	0	2.28	0	0	0	0	0.76	0
rna-XM_027291821.1	gene-LOC104934541	LOC104934541	ras-associated and pleckstrin homology domains-containing protein 1	0.658	0.0355753	down	1.67	2	2.55	1.61	1.1	1.39	2.07333	1.36667
rna-XM_019258917.2	gene-mfn1	mfn1	mitofusin 1, transcript variant X2	0.005	0.0356307	down	0.59	0.73	0	0	0	0	0.44	0
rna-XM_027290357.1	gene-LOC104928391	LOC104928391	ATP-binding cassette sub-family A member 1, transcript variant X3	0.003	0.0357887	down	0.6	0	0.14	0	0	0	0.246667	0
rna-XM_027277776.1	gene-znf804a	znf804a	zinc finger protein 804A	0.462	0.0358162	down	0.54	0.51	0.53	0.25	0.28	0.19	0.526667	0.24
rna-XM_027288056.1	gene-LOC104936986	LOC104936986	receptor-interacting serine/threonine-protein kinase 3	0.004	0.0359309	down	1	0.35	0	0	0	0	0.45	0
rna-XM_010734018.3	gene-sulf1	sulf1	sulfatase 1, transcript variant X2	0.005	0.0360439	down	0	0.37	0.41	0	0	0	0.26	0
rna-XM_027276408.1	gene-LOC113744046	LOC113744046	cold shock domain-containing protein E1-like, transcript variant X5	0.11	0.0360545	down	0.88	1.1	0.79	0.16	0	0.14	0.923333	0.1
rna-XM_027284125.1	gene-epha7	epha7	EPH receptor A7, transcript variant X2	0.005	0.036165	down	0	0.43	0.22	0	0	0	0.216667	0
rna-XM_027289776.1	gene-LOC104935904	LOC104935904	carnitine O-palmitoyltransferase 1, liver isoform, transcript variant X2	0.005	0.0361806	down	0.93	0	0.48	0	0	0	0.47	0
rna-XM_027291633.1	gene-nid2	nid2	nidogen 2, transcript variant X8	0.049	0.0365814	down	0.02	0.03	0.11	0	0.01	0	0.0533333	0.00333333
rna-XM_027280047.1	gene-synrg	synrg	synergin gamma, transcript variant X8	0.005	0.0366525	down	0.35	0.63	0	0	0	0	0.326667	0
rna-XM_027281159.1	gene-tdp1	tdp1	tyrosyl-DNA phosphodiesterase 1, transcript variant X2	0.007	0.0367528	down	1.53	0	0	0	0	0	0.51	0
rna-XM_027276105.1	gene-LOC113744919	LOC113744919	histone-lysine N-methyltransferase 2A-like	0.005	0.0368116	down	0.44	0.57	0	0	0	0	0.336667	0
rna-XM_010747609.3	gene-fmnl3	fmnl3	formin like 3, transcript variant X1	0.005	0.0368405	down	1.11	0	0	0	0	0	0.37	0
rna-XM_027281322.1	gene-LOC104935452	LOC104935452	alpha-1,3-galactosyltransferase 2	0.144	0.0368481	down	0.24	0.28	0.12	0.02	0.04	0.03	0.213333	0.03
rna-XM_027281119.1	gene-LOC104926625	LOC104926625	SH3 and PX domain-containing protein 2A, transcript variant X2	0.005	0.0369687	down	0.18	0	0.14	0	0	0	0.106667	0
rna-XM_019253840.2	gene-hnrnph3	hnrnph3	heterogeneous nuclear ribonucleoprotein H3, transcript variant X2	0.053	0.0369772	down	1	1.78	1.94	0	0.25	0	1.57333	0.0833333
rna-XM_010739344.3	gene-sgk1	sgk1	serum/glucocorticoid regulated kinase 1, transcript variant X3	0.63	0.0370351	down	6.23	5.83	8.09	5	4.9	2.88	6.71667	4.26
rna-XM_019271686.2	gene-LOC104940418	LOC104940418	C-C chemokine receptor type 5, transcript variant X2	0.004	0.0373204	down	1.76	0.47	0	0	0	0	0.743333	0
rna-XM_019265895.2	gene-LOC104935895	LOC104935895	myc-associated zinc finger protein, transcript variant X2	0.005	0.0373336	down	0.63	0.61	0	0	0	0	0.413333	0
rna-XM_027281348.1	gene-sema4b	sema4b	semaphorin 4B, transcript variant X2	0.005	0.0373482	down	0	0.25	0.58	0	0	0	0.276667	0
rna-XM_027277752.1	gene-parg	parg	poly(ADP-ribose) glycohydrolase, transcript variant X3	0.275	0.0375326	down	0.93	0.67	0.72	0.13	0.4	0.11	0.773333	0.213333
rna-XM_027278971.1	gene-LOC104932266	LOC104932266	probable serine/threonine-protein kinase kinX, transcript variant X4	0.004	0.0375538	down	0	0.86	0.17	0	0	0	0.343333	0
rna-XM_027282192.1	gene-LOC104923680	LOC104923680	SH2 domain-containing protein 3C, transcript variant X1	0.004	0.037828	down	0.86	0	0.19	0	0	0	0.35	0
rna-XM_027286071.1	gene-LOC104937728	LOC104937728	shootin-1-like	0.534	0.0379763	down	0.95	1.21	1.45	0.52	0.83	0.58	1.20333	0.643333
rna-XM_019270468.2	gene-LOC104927461	LOC104927461	AFG3-like protein 1, transcript variant X2	0.005	0.0381058	down	0	0.64	0.3	0	0	0	0.313333	0
rna-XM_019278161.2	gene-htt	htt	huntingtin, transcript variant X2	0.002	0.0381235	down	0	0.64	0.06	0	0	0	0.233333	0
rna-XM_027278527.1	gene-LOC104923199	LOC104923199	protocadherin-20, transcript variant X2	0.011	0.0383616	down	0.61	0.06	0.02	0	0	0	0.23	0
rna-XM_019277414.2	gene-LOC104933395	LOC104933395	deleted in malignant brain tumors 1 protein, transcript variant X1	0.557	0.0387223	down	6.73	4.64	10.91	4.6	4.58	3.33	7.42667	4.17
rna-XM_010743769.3	gene-llgl2	llgl2	LLGL scribble cell polarity complex component 2, transcript variant X4	0.604	0.0387707	down	2.25	1.59	1.68	1.24	0.88	1.23	1.84	1.11667
rna-XM_019255724.2	gene-pou2f1	pou2f1	POU class 2 homeobox 1, transcript variant X14	0.022	0.0389373	down	0	0.06	0.18	0	0	0	0.08	0
rna-XM_019262248.2	gene-LOC104918292	LOC104918292	5'-AMP-activated protein kinase subunit gamma-2, transcript variant X7	0.006	0.0389445	down	0.64	0.79	0	0	0	0	0.476667	0
rna-XM_019272189.2	gene-zdhhc12	zdhhc12	zinc finger DHHC-type containing 12, transcript variant X1	0.006	0.0389527	down	0	0.89	1.17	0	0	0	0.686667	0
rna-XM_027291806.1	gene-fubp1	fubp1	far upstream element binding protein 1, transcript variant X3	0.012	0.0389789	down	0.11	0.01	5.78	0	0.07	0	1.96667	0.0233333
rna-XM_019264301.2	gene-LOC104922095	LOC104922095	rap guanine nucleotide exchange factor 5	0.662	0.0390427	down	1.39	1.72	1.65	1.22	1.13	0.81	1.58667	1.05333
rna-XM_019274056.2	gene-LOC104936844	LOC104936844	pleckstrin homology domain-containing family O member 1-A, transcript variant X3	0.04	0.0390464	down	0.03	0.08	0.03	0	0	0	0.0466667	0
rna-XM_019278646.2	gene-LOC104934931	LOC104934931	phosphatidylinositol 4-kinase alpha, transcript variant X1	0.005	0.0391676	down	0.11	0.36	0	0	0	0	0.156667	0
rna-XM_027274424.1	gene-LOC104929372	LOC104929372	ubiquitin thioesterase Zranb1, transcript variant X1	0.004	0.0392727	down	0.86	0.21	0	0	0	0	0.356667	0
rna-XM_019266700.2	gene-plekhg3	plekhg3	pleckstrin homology and RhoGEF domain containing G3, transcript variant X2	0.005	0.0392727	down	0.18	0	0.57	0	0	0	0.25	0
rna-XM_019268618.2	gene-LOC104930919	LOC104930919	cAMP-specific 3',5'-cyclic phosphodiesterase 4D, transcript variant X2	0.006	0.0392872	down	0	0.26	0.3	0	0	0	0.186667	0
rna-XM_027285311.1	gene-LOC104935880	LOC104935880	caskin-2, transcript variant X5	0.006	0.0393038	down	0.31	0	0.35	0	0	0	0.22	0
rna-XM_010730251.3	gene-LOC104918477	LOC104918477	sphingosine 1-phosphate receptor 3	0.588	0.0393578	down	3.51	4.81	5.59	3.76	2.39	2.07	4.63667	2.74
rna-XM_019268817.2	gene-zbtb4	zbtb4	zinc finger and BTB domain containing 4, transcript variant X4	0.303	0.0394327	down	2.14	1.38	2.27	0.19	0.38	1.18	1.93	0.583333
rna-XM_027288492.1	gene-LOC109141590	LOC109141590	DNA (cytosine-5)-methyltransferase 3B, transcript variant X2	0.583	0.0395476	down	7.63	7.64	7.15	3.16	4.83	5.2	7.47333	4.39667
rna-XM_019258550.2	gene-slco5a1	slco5a1	solute carrier organic anion transporter family member 5A1, transcript variant X1	0.329	0.0396441	down	0.37	0.53	0.43	0.11	0.23	0.1	0.443333	0.146667
rna-XM_027289065.1	gene-LOC104928460	LOC104928460	otolith matrix protein OMM-64, transcript variant X2	0.064	0.0398276	down	0.31	0.32	0.46	0	0	0.05	0.363333	0.0166667
rna-XR_003462852.1	gene-LOC104934694	LOC104934694	protein phosphatase Slingshot homolog 1, transcript variant X2	0.004	0.0398413	down	0	0.1	0.49	0	0	0	0.196667	0
rna-XM_019268209.2	gene-LOC104940528	LOC104940528	P2X purinoceptor 5, transcript variant X1	0.049	0.0399732	down	1.96	3.34	0.54	0	0.28	0	1.94667	0.0933333
rna-XM_019273033.2	gene-lrfn5	lrfn5	leucine rich repeat and fibronectin type III domain containing 5, transcript variant X2	0.006	0.0400164	down	0.57	0	0.22	0	0	0	0.263333	0
rna-XM_019274356.2	gene-LOC104918505	LOC104918505	transducin-like enhancer protein 4, transcript variant X2	0.612	0.0400317	down	3.69	3.78	4.69	3.53	2.31	1.64	4.05333	2.49333
rna-XM_027275346.1	gene-LOC104936770	LOC104936770	membrane-spanning 4-domains subfamily A member 4A-like	0.651	0.040067	down	18.57	23.87	16.66	12.1	10.07	16.55	19.7	12.9067
rna-XM_019258551.2	gene-LOC104926096	LOC104926096	transcription factor HIVEP3-like, transcript variant X1	0.007	0.0400716	down	0.28	0	0.24	0	0	0	0.173333	0
rna-XM_027274544.1	gene-ipcef1	ipcef1	interaction protein for cytohesin exchange factors 1, transcript variant X1	0.006	0.0400851	down	0.77	0	0.49	0	0	0	0.42	0
rna-XM_027282826.1	gene-LOC104936946	LOC104936946	oxysterol-binding protein 1, transcript variant X1	0.019	0.0402378	down	0.12	0.09	0	0	0	0	0.07	0
rna-XM_019266308.2	gene-ggps1	ggps1	geranylgeranyl diphosphate synthase 1, transcript variant X4	0.006	0.040261	down	0	0.59	1.52	0	0	0	0.703333	0
rna-XM_019277566.2	gene-LOC109136672	LOC109136672	LIM and senescent cell antigen-like-containing domain protein 1, transcript variant X4	0.612	0.0403351	down	4.46	6.63	6.25	3.93	4.4	2.34	5.78	3.55667
rna-XM_027282091.1	gene-ptpn13	ptpn13	protein tyrosine phosphatase, non-receptor type 13, transcript variant X4	0.006	0.0403957	down	0.12	0	0.22	0	0	0	0.113333	0
rna-XM_019267852.2	gene-LOC104940665	LOC104940665	dynamin-1-like protein, transcript variant X3	0.005	0.0404748	down	1.5	0	0.41	0	0	0	0.636667	0
rna-XM_019273705.2	gene-armc1	armc1	armadillo repeat containing 1, transcript variant X4	0.007	0.0406062	down	1.26	0	1.88	0	0	0	1.04667	0
rna-XM_027275505.1	gene-LOC104934710	LOC104934710	zinc finger protein 70, transcript variant X2	0.006	0.0406576	down	0	0.53	1	0	0	0	0.51	0
rna-XM_010754411.3	gene-ncbp1	ncbp1	nuclear cap binding protein subunit 1, transcript variant X1	0.662	0.0407265	down	13.39	7.63	8.58	6.69	6.75	6.33	9.86667	6.59
rna-XM_027274937.1	gene-tecpr2	tecpr2	tectonin beta-propeller repeat containing 2, transcript variant X3	0.006	0.0409244	down	0	0.17	0.51	0	0	0	0.226667	0
rna-XM_019274971.2	gene-LOC104923451	LOC104923451	transcriptional regulator ATRX, transcript variant X1	0.657	0.0409273	down	2.15	1.98	1.48	1.27	1.26	1.17	1.87	1.23333
rna-XM_010747507.3	gene-mrpl30	mrpl30	mitochondrial ribosomal protein L30	0.006	0.0410027	down	1.83	5.43	0	0	0	0	2.42	0
rna-XM_027284133.1	gene-LOC104924693	LOC104924693	serine/threonine-protein phosphatase 2A 56 kDa regulatory subunit gamma isoform, transcript variant X2	0.002	0.0410669	down	2.57	0	0.13	0	0	0	0.9	0
rna-XM_010731484.3	gene-usp10	usp10	ubiquitin specific peptidase 10, transcript variant X3	0.361	0.0411663	down	1.99	1.89	0.47	0.65	0.37	0.55	1.45	0.523333
rna-XM_027290835.1	gene-ptpn4	ptpn4	protein tyrosine phosphatase, non-receptor type 4, transcript variant X2	0.007	0.0412088	down	0.39	0.22	0	0	0	0	0.203333	0
rna-XM_027285773.1	gene-LOC104929443	LOC104929443	ubiquitin carboxyl-terminal hydrolase 43-like, transcript variant X1	0.004	0.0413731	down	0.14	0	1.25	0	0	0	0.463333	0
rna-XM_027288854.1	gene-ttpal	ttpal	alpha tocopherol transfer protein like, transcript variant X1	0.005	0.0414267	down	0	0.32	1.43	0	0	0	0.583333	0
rna-XM_010742314.3	gene-LOC104928092	LOC104928092	PDZ domain-containing protein GIPC3, transcript variant X1	0.02	0.0414557	down	0.02	0.05	4.89	0	0.06	0.03	1.65333	0.03
rna-XM_027280629.1	gene-bcas3	bcas3	BCAS3, microtubule associated cell migration factor, transcript variant X7	0.006	0.0414702	down	0	0.22	0.73	0	0	0	0.316667	0
rna-XR_003462470.1	gene-LOC104937145	LOC104937145	uncharacterized LOC104937145, transcript variant X3	0.007	0.0415195	down	1.29	1.2	0	0	0	0	0.83	0
rna-XM_027288532.1	gene-LOC104934583	LOC104934583	death effector domain-containing protein, transcript variant X5	0.007	0.0416912	down	0.21	0	0.44	0	0	0	0.216667	0
rna-XM_019273101.2	gene-abca2	abca2	ATP binding cassette subfamily A member 2, transcript variant X3	0.007	0.041869	down	0.14	0	0.14	0	0	0	0.0933333	0
rna-XM_027291089.1	gene-stk39	stk39	serine/threonine kinase 39, transcript variant X2	0.007	0.0418902	down	0.43	0	0.48	0	0	0	0.303333	0
rna-XM_027286158.1	gene-LOC109142234	LOC109142234	C-type lectin domain family 4 member E	0.238	0.0419827	down	1.18	1.18	1.14	0.34	0.33	0.15	1.16667	0.273333
rna-XM_027272291.1	gene-ptpro	ptpro	protein tyrosine phosphatase, receptor type O, transcript variant X2	0.155	0.0420845	down	3.95	0.32	3.63	0.41	0.09	0.72	2.63333	0.406667
rna-XR_002042138.2	gene-rbm26	rbm26	RNA binding motif protein 26, transcript variant X1	0.604	0.0421291	down	3.57	4.59	3.57	2.05	3.4	1.66	3.91	2.37
rna-XM_027277902.1	gene-LOC104931147	LOC104931147	bone morphogenetic protein 1	0.526	0.0421864	down	6.21	8.55	7.21	3.48	6.07	2.07	7.32333	3.87333
rna-XM_027285413.1	gene-LOC109142533	LOC109142533	leucine-rich repeat flightless-interacting protein 2, transcript variant X8	0.008	0.042242	down	0	0	0.52	0	0	0	0.173333	0
rna-XM_027287725.1	gene-chd3	chd3	chromodomain helicase DNA binding protein 3, transcript variant X3	0.403	0.0423128	down	0.67	0.52	0.41	0.14	0.19	0.31	0.533333	0.213333
rna-XM_019262335.2	gene-LOC104918256	LOC104918256	bromodomain adjacent to zinc finger domain protein 2B, transcript variant X4	0.431	0.0423788	down	0.46	1.21	0.74	0.3	0.51	0.23	0.803333	0.346667
rna-XM_027278462.1	gene-hnrnpk	hnrnpk	heterogeneous nuclear ribonucleoprotein K, transcript variant X3	0.008	0.0424112	down	0.67	0	0.57	0	0	0	0.413333	0
rna-XM_027283651.1	gene-cep290	cep290	centrosomal protein 290, transcript variant X3	0.006	0.0424144	down	0.32	0.11	0	0	0	0	0.143333	0
rna-XM_019259680.2	gene-LOC109138681	LOC109138681	zinc finger BED domain-containing protein 1, transcript variant X1	0.006	0.0424154	down	0.87	0.31	0	0	0	0	0.393333	0
rna-XM_027273493.1	gene-LOC104923440	LOC104923440	transient receptor potential cation channel subfamily V member 1, transcript variant X3	0.004	0.0425787	down	1.62	0	0.22	0	0	0	0.613333	0
rna-XM_019264502.2	gene-LOC104921639	LOC104921639	solute carrier family 23 member 2, transcript variant X2	0.007	0.0426093	down	0.14	0.29	0	0	0	0	0.143333	0
rna-XM_027289743.1	gene-LOC104923885	LOC104923885	neurexin-1a, transcript variant X2	0.007	0.042799	down	0	0.43	0.15	0	0	0	0.193333	0
rna-XM_019253824.2	gene-LOC104920185	LOC104920185	XK-related protein 5-like, transcript variant X2	0.006	0.0428594	down	0	0.11	0.51	0	0	0	0.206667	0
rna-XM_019267806.2	gene-LOC104927910	LOC104927910	uncharacterized LOC104927910, transcript variant X4	0.034	0.0429364	down	0.03	0.28	0	0	0	0	0.103333	0
rna-XM_019277718.2	gene-LOC104938682	LOC104938682	uncharacterized LOC104938682, transcript variant X3	0.051	0.0429455	down	0.02	0.02	0.03	0	0	0	0.0233333	0
rna-XM_027284930.1	gene-LOC104927737	LOC104927737	NACHT, LRR and PYD domains-containing protein 12-like	0.037	0.042964	down	0.05	0.02	0.11	0	0	0	0.06	0
rna-XM_019269185.2	gene-setd5	setd5	SET domain containing 5, transcript variant X8	0.008	0.0429842	down	0.23	0.16	0	0	0	0	0.13	0
rna-XM_010734481.3	gene-rfx2	rfx2	regulatory factor X2, transcript variant X3	0.594	0.043021	down	1.29	1.52	1.72	0.82	0.79	1.08	1.51	0.896667
rna-XM_027279329.1	gene-ip6k1	ip6k1	inositol hexakisphosphate kinase 1, transcript variant X4	0.007	0.0430516	down	0.33	0	0.18	0	0	0	0.17	0
rna-XM_019271816.2	gene-kcnt1	kcnt1	potassium sodium-activated channel subfamily T member 1, transcript variant X6	0.039	0.0430959	down	0.35	0.36	0.02	0.03	0	0	0.243333	0.01
rna-XM_027273272.1	gene-larp1	larp1	La ribonucleoprotein domain family member 1, transcript variant X6	0.008	0.0431591	down	0.2	0.17	0	0	0	0	0.123333	0
rna-XM_027278036.1	gene-LOC104930614	LOC104930614	annexin A11, transcript variant X3	0.521	0.0431635	down	7.46	3.53	3.73	2.74	3.01	2.01	4.90667	2.58667
rna-XM_027283816.1	gene-LOC104934095	LOC104934095	zinc finger protein ubi-d4, transcript variant X2	0.04	0.0432225	down	0.95	1.53	0.07	0.1	0	0	0.85	0.0333333
rna-XM_019253967.2	gene-ephb3	ephb3	EPH receptor B3, transcript variant X2	0.008	0.0433549	down	0.21	0	0.13	0	0	0	0.113333	0
rna-XM_019261537.2	gene-LOC104922633	LOC104922633	high-affinity choline transporter 1, transcript variant X3	0.008	0.0433627	down	0	0.32	0.38	0	0	0	0.233333	0
rna-XM_010750615.3	gene-LOC104934855	LOC104934855	microtubule-associated protein 9, transcript variant X1	0.008	0.0433897	down	0.52	0.66	0	0	0	0	0.393333	0
rna-XM_019263902.2	gene-LOC104930405	LOC104930405	protocadherin gamma-C5, transcript variant X33	0.557	0.0435129	down	0.84	1.22	1.53	0.71	0.73	0.56	1.19667	0.666667
rna-XM_027286793.1	gene-LOC113744044	LOC113744044	protein NLRC3-like	0.41	0.0435216	down	7.82	16.46	12.39	3.2	2.73	8.99	12.2233	4.97333
rna-XM_027284826.1	gene-LOC104931116	LOC104931116	protein TANC2, transcript variant X3	0.008	0.0435331	down	0.18	0	0.11	0	0	0	0.0966667	0
rna-XM_027291126.1	gene-cxviiih21orf62	cxviiih21orf62	chromosome XVIII C21orf62 homolog, transcript variant X4	0.008	0.0435344	down	0.11	0	0.23	0	0	0	0.113333	0
rna-XM_010745586.3	gene-comtd1	comtd1	catechol-O-methyltransferase domain containing 1, transcript variant X1	0.563	0.043595	down	43.28	44.48	18.97	19.22	23.82	17.88	35.5767	20.3067
rna-XR_003462389.1	gene-LOC104928264	LOC104928264	uncharacterized LOC104928264, transcript variant X1	0.04	0.0436419	down	0.27	0.09	0.45	0	0	0	0.27	0
rna-XM_027279687.1	gene-LOC104919474	LOC104919474	high mobility group protein HMGI-C, transcript variant X6	0.008	0.0437027	down	0.38	0.21	0	0	0	0	0.196667	0
rna-XM_019264952.2	gene-mast4	mast4	microtubule associated serine/threonine kinase family member 4, transcript variant X4	0.007	0.0437468	down	0	0.19	0.08	0	0	0	0.09	0
rna-XM_019260022.2	gene-frmd4a	frmd4a	FERM domain containing 4A, transcript variant X7	0.008	0.0437929	down	0.2	0	0.2	0	0	0	0.133333	0
rna-XM_027290117.1	gene-LOC104927963	LOC104927963	lysine-specific demethylase 4B-like, transcript variant X1	0.008	0.0439024	down	0.34	0	0.16	0	0	0	0.166667	0
rna-XM_019277757.2	gene-LOC104937342	LOC104937342	brain-specific angiogenesis inhibitor 1-associated protein 2, transcript variant X3	0.06	0.0439277	down	0.29	0.17	0.18	0	0	0.03	0.213333	0.01
rna-XR_002042762.2	gene-LOC109141472	LOC109141472	uncharacterized LOC109141472	0.04	0.0439966	down	1.67	1.03	0.33	0	0	0	1.01	0
rna-XM_010737876.3	gene-LOC104924511	LOC104924511	metalloproteinase inhibitor 3	0.601	0.0443255	down	8.07	10.79	11.13	6.03	8.42	3.68	9.99667	6.04333
rna-XM_027278838.1	gene-LOC104933223	LOC104933223	solute carrier family 45 member 3, transcript variant X2	0.008	0.044335	down	0.3	0	0.36	0	0	0	0.22	0
rna-XR_003462247.1	gene-ube3b	ube3b	ubiquitin protein ligase E3B, transcript variant X2	0.366	0.0447472	down	0.82	0.39	0.52	0.25	0.26	0.12	0.576667	0.21
rna-XM_027283971.1	gene-LOC104926135	LOC104926135	DNA (cytosine-5)-methyltransferase 3A, transcript variant X6	0.009	0.0447496	down	0	0.29	0.19	0	0	0	0.16	0
rna-XM_019260587.2	gene-LOC104928835	LOC104928835	sodium/calcium exchanger 1, transcript variant X1	0.262	0.0448118	down	0.41	0.23	0.32	0.03	0.05	0.17	0.32	0.0833333
rna-XM_010755089.3	gene-LOC104938666	LOC104938666	myocyte-specific enhancer factor 2C, transcript variant X3	0.007	0.044904	down	0	0.13	0.43	0	0	0	0.186667	0
rna-XM_027274132.1	gene-LOC104922457	LOC104922457	partitioning defective 3 homolog, transcript variant X2	0.009	0.0449406	down	0	0.19	0.13	0	0	0	0.106667	0
rna-XM_019258574.2	gene-LOC104935580	LOC104935580	dystroglycan, transcript variant X2	0.009	0.0450322	down	0.26	0.4	0	0	0	0	0.22	0
rna-XM_019262947.2	gene-LOC104920503	LOC104920503	RNA-binding protein 6, transcript variant X2	0.012	0.0451935	down	0.49	0	0	0	0	0	0.163333	0
rna-XM_027281747.1	gene-LOC104937942	LOC104937942	serine/threonine-protein phosphatase 2B catalytic subunit alpha isoform, transcript variant X3	0.008	0.045232	down	0.23	0	0.53	0	0	0	0.253333	0
rna-XM_027282087.1	gene-srek1	srek1	splicing regulatory glutamic acid and lysine rich protein 1, transcript variant X7	0.007	0.0452323	down	0	0.79	0	0	0	0	0.263333	0
rna-XM_027281228.1	gene-cog8	cog8	component of oligomeric golgi complex 8, transcript variant X4	0.006	0.0452556	down	0.28	1.59	0	0	0	0	0.623333	0
rna-XR_003463981.1	gene-LOC104938095	LOC104938095	mitofusin-1, transcript variant X13	0.031	0.0454067	down	0.3	0	0.04	0	0	0	0.113333	0
rna-XM_019258960.2	gene-usp13	usp13	ubiquitin specific peptidase 13, transcript variant X1	0.006	0.0454103	down	0.79	0	0.17	0	0	0	0.32	0
rna-XM_019278336.2	gene-rfx3	rfx3	regulatory factor X3, transcript variant X2	0.009	0.0454134	down	0.16	0	0.27	0	0	0	0.143333	0
rna-XM_027275419.1	gene-LOC104937926	LOC104937926	palmdelphin, transcript variant X1	0.056	0.0454313	down	0.02	0.02	0.02	0	0	0	0.02	0
rna-XM_010738137.3	gene-LOC104924699	LOC104924699	ATP-dependent 6-phosphofructokinase, platelet type, transcript variant X6	0.046	0.0455162	down	0.11	0	0.07	0	0	0	0.06	0
rna-XM_027282437.1	gene-nacc1	nacc1	nucleus accumbens associated 1, transcript variant X6	0.009	0.0456186	down	0.09	0	0.14	0	0	0	0.0766667	0
rna-XM_027281859.1	gene-LOC104932419	LOC104932419	zinc finger protein 774, transcript variant X1	0.007	0.0456495	down	0.29	0.95	0	0	0	0	0.413333	0
rna-XM_027285610.1	gene-LOC104930707	LOC104930707	progestin and adipoQ receptor family member 4, transcript variant X3	0.006	0.0459047	down	0.15	1	0	0	0	0	0.383333	0
rna-XM_019262803.2	gene-LOC104933955	LOC104933955	protein TANC2, transcript variant X8	0.009	0.0459223	down	0	0.09	0.18	0	0	0	0.09	0
rna-XM_027275197.1	gene-dync1h1	dync1h1	dynein cytoplasmic 1 heavy chain 1, transcript variant X1	0.374	0.0459449	down	0.78	1.04	0.3	0.13	0.28	0.38	0.706667	0.263333
rna-XR_003463707.1	gene-LOC113747585	LOC113747585	low affinity immunoglobulin gamma Fc region receptor II-like, transcript variant X3	0.009	0.0459908	down	1.98	1.12	0	0	0	0	1.03333	0
rna-XM_019262598.2	gene-LOC104935046	LOC104935046	ATP-dependent RNA helicase DDX3X, transcript variant X4	0.113	0.046036	down	0.96	0.48	0.65	0	0.02	0.21	0.696667	0.0766667
rna-XM_019272289.2	gene-LOC104917848	LOC104917848	tropomyosin alpha-1 chain, transcript variant X8	0.006	0.0464182	down	0	0.24	1.56	0	0	0	0.6	0
rna-XM_027280067.1	gene-abcc5	abcc5	ATP binding cassette subfamily C member 5, transcript variant X3	0.008	0.0464185	down	0.42	0	0.14	0	0	0	0.186667	0
rna-XM_010741962.3	gene-LOC104927796	LOC104927796	RNA-binding protein Nova-1, transcript variant X2	0.01	0.0465723	down	0	0.13	0.09	0	0	0	0.0733333	0
rna-XM_019261952.2	gene-shisa9	shisa9	shisa family member 9, transcript variant X1	0.009	0.0466395	down	0.17	0.15	0	0	0	0	0.106667	0
rna-XM_019278094.2	gene-phka2	phka2	phosphorylase kinase regulatory subunit alpha 2, transcript variant X4	0.01	0.0466759	down	0	0.3	0.32	0	0	0	0.206667	0
rna-XM_010755173.3	gene-LOC104938730	LOC104938730	vacuolar protein 8-like	0.294	0.0466993	down	1.87	1.31	1.24	0.16	0.44	0.7	1.47333	0.433333
rna-XM_027277075.1	gene-LOC104936552	LOC104936552	multiple inositol polyphosphate phosphatase 1, transcript variant X1	0.059	0.046714	down	0.47	1.64	1.27	0	0	0.18	1.12667	0.06
rna-XM_027277357.1	gene-LOC104940100	LOC104940100	AP-3 complex subunit mu-1, transcript variant X3	0.649	0.0467757	down	4.41	5.8	4.53	3.45	2.38	3.77	4.91333	3.2
rna-XM_019257520.2	gene-LOC104920353	LOC104920353	ubiquitin-associated protein 2, transcript variant X1	0.009	0.0467936	down	0.18	0	0.34	0	0	0	0.173333	0
rna-XM_019269448.2	gene-LOC104940048	LOC104940048	diamine acetyltransferase 2, transcript variant X2	0.01	0.046914	down	1.34	0	1.9	0	0	0	1.08	0
rna-XM_019256062.2	gene-rbpms	rbpms	RNA binding protein, mRNA processing factor, transcript variant X2	0.507	0.0469737	down	2.69	5.71	5.35	3.43	2.12	1.45	4.58333	2.33333
rna-XM_027281828.1	gene-LOC104924300	LOC104924300	uncharacterized LOC104924300, transcript variant X1	0.01	0.0471051	down	0.48	0	0.33	0	0	0	0.27	0
rna-XM_010732201.3	gene-LOC104920048	LOC104920048	claudin-11	0.413	0.0471448	down	4.97	2.87	6.67	3.44	1.24	1.37	4.83667	2.01667
rna-XM_027272097.1	gene-LOC113744057	LOC113744057	olfactomedin-like	0.346	0.0471987	down	9.21	36.36	20.27	9.38	10.78	2.77	21.9467	7.64333
rna-XM_010732196.3	gene-fndc3b	fndc3b	fibronectin type III domain containing 3B, transcript variant X1	0.535	0.047276	down	0.83	0.94	1.27	0.54	0.49	0.61	1.01333	0.546667
rna-XM_027275555.1	gene-LOC104933590	LOC104933590	neural cell adhesion molecule L1.1, transcript variant X1	0.008	0.0473042	down	0	0.49	0.13	0	0	0	0.206667	0
rna-XM_019256989.2	gene-LOC104929349	LOC104929349	rho GTPase-activating protein 7, transcript variant X4	0.01	0.0473162	down	0.24	0	0.19	0	0	0	0.143333	0
rna-XM_027282867.1	gene-LOC104926535	LOC104926535	EVI5-like protein, transcript variant X2	0.01	0.0473296	down	0.3	0.29	0	0	0	0	0.196667	0
rna-XM_019276048.2	gene-LOC104938704	LOC104938704	zinc finger protein 35-like, transcript variant X1	0.01	0.0473503	down	0	0.5	0.31	0	0	0	0.27	0
rna-XM_027286404.1	gene-LOC104928643	LOC104928643	bromodomain-containing protein 2, transcript variant X2	0.008	0.0473629	down	0	0.18	0.58	0	0	0	0.253333	0
rna-XM_010750585.3	gene-LOC104934832	LOC104934832	tumor necrosis factor ligand superfamily member 11	0.56	0.0473894	down	1.77	1.39	1.7	0.92	1.07	0.76	1.62	0.916667
rna-XM_027276857.1	gene-LOC113745327	LOC113745327	heat shock cognate 71 kDa protein-like	0.305	0.0474783	down	70.28	71.11	11.71	13.99	9.48	24.26	51.0333	15.91
rna-XM_027282573.1	gene-LOC104922088	LOC104922088	gamma-adducin, transcript variant X9	0.028	0.0475074	down	0	1.22	0.83	0.05	0	0	0.683333	0.0166667
rna-XM_027275003.1	gene-clip1	clip1	CAP-Gly domain containing linker protein 1, transcript variant X9	0.008	0.0475211	down	0.07	0.28	0	0	0	0	0.116667	0
rna-XM_027272236.1	gene-rtcb	rtcb	RNA 2',3'-cyclic phosphate and 5'-OH ligase	0.004	0.0475733	down	1.31	0.11	0	0	0	0	0.473333	0
rna-XM_019278806.2	gene-LOC104931165	LOC104931165	histone-lysine N-methyltransferase SETD1B-A, transcript variant X4	0.459	0.047661	down	0.83	0.44	0.35	0.17	0.27	0.31	0.54	0.25
rna-XM_010747966.3	gene-LOC104932679	LOC104932679	protein disulfide-isomerase TMX3	0.059	0.0478178	down	0.09	0.09	0.09	0	0	0	0.09	0
rna-XM_019264251.2	gene-LOC104929091	LOC104929091	histone-lysine N-methyltransferase ASH1L, transcript variant X2	0.512	0.0478257	down	0.95	0.62	0.5	0.29	0.51	0.27	0.69	0.356667
rna-XM_010751343.3	gene-ascc2	ascc2	activating signal cointegrator 1 complex subunit 2, transcript variant X1	0.421	0.0478611	down	7.02	7.52	7.18	4.18	0.94	4.02	7.24	3.04667
rna-XM_019276984.2	gene-mpp5	mpp5	membrane palmitoylated protein 5, transcript variant X3	0.009	0.0478769	down	0	0.24	0.57	0	0	0	0.27	0
rna-XM_027277771.1	gene-LOC104929776	LOC104929776	collagen alpha-1(XVII) chain-like, transcript variant X6	0.01	0.0480059	down	0	0.14	0.15	0	0	0	0.0966667	0
rna-XM_010736796.3	gene-safb2	safb2	scaffold attachment factor B2, transcript variant X2	0.655	0.0480335	down	13.53	7.91	15.22	7.36	8.47	8.34	12.22	8.05667
rna-XM_027290224.1	gene-cfh	cfh	complement factor H	0.444	0.0480751	down	7.05	26.69	14.92	8.51	8.62	4.49	16.22	7.20667
rna-XM_019263505.2	gene-itgb4	itgb4	integrin subunit beta 4, transcript variant X5	0.007	0.0480834	down	0	0.06	0.34	0	0	0	0.133333	0
rna-XM_019268804.2	gene-LOC104923863	LOC104923863	proto-oncogene tyrosine-protein kinase Src, transcript variant X4	0.539	0.0480935	down	2.31	3.39	3.18	1.48	2.41	0.92	2.96	1.60333
rna-XM_010754489.3	gene-LOC104938140	LOC104938140	C-C motif chemokine 3	0.662	0.0481015	down	54.72	86.48	102.51	52.67	65.55	46.96	81.2367	55.06
rna-XM_019266027.2	gene-wdr6	wdr6	WD repeat domain 6, transcript variant X2	0.491	0.0481612	down	1.93	3.05	1.59	1.31	1.36	0.57	2.19	1.08
rna-XM_027284684.1	gene-LOC109140071	LOC109140071	protein CEBPZOS	0.173	0.0481878	down	0.83	2.13	1.11	0.23	0.28	0.17	1.35667	0.226667
rna-XM_027279877.1	gene-plxna1	plxna1	plexin A1, transcript variant X1	0.461	0.0482267	down	0.67	0.96	0.71	0.61	0.21	0.26	0.78	0.36
rna-XM_027281810.1	gene-LOC104921967	LOC104921967	FERM domain-containing protein 4B, transcript variant X5	0.008	0.0482273	down	0.48	0.16	0	0	0	0	0.213333	0
rna-XM_019278295.2	gene-slain2	slain2	SLAIN motif family member 2, transcript variant X1	0.009	0.0483801	down	0.44	0	0.19	0	0	0	0.21	0
rna-XM_027283145.1	gene-dclk2	dclk2	doublecortin like kinase 2, transcript variant X3	0.01	0.0484105	down	0	0.15	0.24	0	0	0	0.13	0
rna-XM_027288200.1	gene-asb10	asb10	ankyrin repeat and SOCS box containing 10, transcript variant X3	0.051	0.0484235	down	0.09	0.03	0.09	0	0	0	0.07	0
rna-XM_027288665.1	gene-LOC104932572	LOC104932572	beta-1,4 N-acetylgalactosaminyltransferase 1, transcript variant X1	0.01	0.0484863	down	0.23	0.19	0	0	0	0	0.14	0
rna-XM_019271098.2	gene-LOC104919678	LOC104919678	toll-like receptor 13, transcript variant X2	0.349	0.0484934	down	6.76	4.95	10.37	2.72	0.7	4.26	7.36	2.56
rna-XM_010737315.3	gene-map3k7	map3k7	mitogen-activated protein kinase kinase kinase 7, transcript variant X1	0.451	0.048606	down	2.71	1.63	2.67	0.74	0.66	1.75	2.33667	1.05
rna-XM_019262297.2	gene-LOC104924845	LOC104924845	midnolin-A, transcript variant X1	0.498	0.0486111	down	7.62	9.35	17.01	4.31	8.71	4.04	11.3267	5.68667
rna-XM_019264231.2	gene-clasp2	clasp2	cytoplasmic linker associated protein 2, transcript variant X3	0.009	0.0486714	down	0.25	0.09	0	0	0	0	0.113333	0
rna-XM_010754576.3	gene-LOC104938216	LOC104938216	cyclic AMP-responsive element-binding protein 3-like protein 4, transcript variant X2	0.471	0.0486956	down	1.69	2.38	2.58	1.51	0.72	0.92	2.21667	1.05
rna-XR_003464049.1	gene-polrmt	polrmt	RNA polymerase mitochondrial, transcript variant X2	0.01	0.0487849	down	0.23	0.18	0	0	0	0	0.136667	0
rna-XM_019257453.2	gene-LOC104926386	LOC104926386	dedicator of cytokinesis protein 9-like, transcript variant X2	0.011	0.0488276	down	0.11	0.14	0	0	0	0	0.0833333	0
rna-XM_027289482.1	gene-LOC104932880	LOC104932880	microtubule-associated protein futsch, transcript variant X7	0.011	0.0489012	down	0.21	0.16	0	0	0	0	0.123333	0
rna-XM_019262298.2	gene-LOC104924845	LOC104924845	midnolin-A, transcript variant X2	0.129	0.048914	down	10.37	26.13	4.27	0.04	1.51	3.66	13.59	1.73667
rna-XM_010732337.3	gene-tbp	tbp	TATA-box binding protein, transcript variant X2	0.505	0.0489322	down	7.28	12.02	4.64	4.89	3.02	4.25	7.98	4.05333
rna-XM_019275672.2	gene-map3k4	map3k4	mitogen-activated protein kinase kinase kinase 4, transcript variant X1	0.393	0.0489488	down	1.53	1.19	0.95	0.61	0.68	0.16	1.22333	0.483333
rna-XR_003462053.1	gene-LOC113745229	LOC113745229	uncharacterized LOC113745229	0.034	0.0489683	down	1.58	40.72	2.86	1.43	0	0	15.0533	0.476667
rna-XM_019261244.2	gene-usp5	usp5	ubiquitin specific peptidase 5, transcript variant X1	0.008	0.04898	down	0	0.9	0.19	0	0	0	0.363333	0
rna-XM_010732482.3	gene-pdlim5	pdlim5	PDZ and LIM domain 5, transcript variant X1	0.54	0.0489933	down	2.5	1.6	3.35	1.59	1.5	0.96	2.48333	1.35
rna-XM_027283423.1	gene-LOC104926852	LOC104926852	hemicentin-1, transcript variant X3	0.009	0.0490015	down	1.26	0.5	0	0	0	0	0.586667	0
rna-XM_019277118.2	gene-eml1	eml1	EMAP like 1, transcript variant X7	0.01	0.0490193	down	0	0.13	0.33	0	0	0	0.153333	0
rna-XM_010749444.3	gene-LOC104933900	LOC104933900	acidic mammalian chitinase-like	0.045	0.0491323	down	0.07	0.19	0.04	0	0	0	0.1	0
rna-XM_027291391.1	gene-LOC104931308	LOC104931308	CLIP-associating protein 1-B-like, transcript variant X5	0.008	0.0492058	down	0	0.28	0.06	0	0	0	0.113333	0
rna-XR_003462882.1	gene-LOC113746448	LOC113746448	uncharacterized LOC113746448	0.045	0.0492243	down	35.2	7.17	13.89	0	0	0	18.7533	0
rna-XM_027283788.1	gene-rnf220	rnf220	ring finger protein 220, transcript variant X5	0.012	0.0492418	down	0	0.39	0	0	0	0	0.13	0
rna-XM_019256263.2	gene-pnkp	pnkp	polynucleotide kinase 3'-phosphatase, transcript variant X3	0.009	0.0492584	down	0.3	0.83	0	0	0	0	0.376667	0
rna-XM_027288332.1	gene-LOC104928353	LOC104928353	SPRY domain-containing protein 3	0.527	0.0492954	down	3.04	3.63	2.44	1.36	0.96	2.47	3.03667	1.59667
rna-XM_019274464.2	gene-LOC104925971	LOC104925971	RIMS-binding protein 2, transcript variant X2	0.011	0.049404	down	0.37	0	0.48	0	0	0	0.283333	0
rna-XM_027289642.1	gene-dock1	dock1	dedicator of cytokinesis 1, transcript variant X1	0.011	0.049473	down	0.13	0	0.14	0	0	0	0.09	0
rna-XM_019267695.2	gene-LOC104927228	LOC104927228	zinc finger protein 395, transcript variant X1	0.011	0.0495097	down	0.83	0	0	0	0	0	0.276667	0
rna-XM_010739801.3	gene-scly	scly	selenocysteine lyase, transcript variant X2	0.512	0.0496246	down	3.61	2.87	2.55	1.54	1.33	1.79	3.01	1.55333
rna-XM_027273643.1	gene-pknox2	pknox2	PBX/knotted 1 homeobox 2, transcript variant X3	0.011	0.0496628	down	0	0.27	0.28	0	0	0	0.183333	0
rna-XM_027274637.1	gene-LOC104932475	LOC104932475	dynactin subunit 1, transcript variant X7	0.007	0.0497489	down	0	0.09	0.5	0	0	0	0.196667	0
rna-XM_019276339.2	gene-LOC104926036	LOC104926036	dynactin subunit 1, transcript variant X1	0.011	0.049838	down	0.38	0.75	0	0	0	0	0.376667	0
rna-XM_019253073.2	gene-mecom	mecom	MDS1 and EVI1 complex locus, transcript variant X1	0.011	0.0498766	down	0.15	0	0.15	0	0	0	0.1	0
