# Supplementary material for: Comparative Transcriptomics Reveals the microRNA-Mediated Immune Response of Large Yellow Croaker (Larimichthys crocea) to Pseudomonas plecoglossicida Infection
Source: MDPI journal article supplement (doi:10.3390/fishes8010010), 2022-12-23
Supplement: s1 [file s1 › Table S9.xlsx]

## Sheet: Table S9
Table S9 Overview information of DEmiRNA target genes at 12 h
miRNA name	target transcript id	target gene id	target gene name	target gene description	start_miranda	end_miranda	score_miranda	energy_miranda	paired_miranda	start_rnahybrid	end_rnahybrid	energy_rnahybrid	pvalue_rnahybrid	paired_rnahybrid	miRTarBase
lcr-miR-N58	rna-XM_019277584.2	gene-unc80	unc80	unc-80 homolog, NALCN channel complex subunit, transcript variant X13	403	427	171	-32.58	miRNA: 3' acuuGUAAG-UUGCGACAGCCACUc 5' **:*|||||*:|||||||:|||||* target: 5' gagcCATTCTGACGCTGTTGGTGAc 3'	402	425	-36.7	0.000718	target: 5' AUUCUGACGCUGUUGGUGAC 3' ||||*:|||||||:|||||* miRNA: 3' UAAG-UUGCGACAGCCACUC 5'	no
lcr-miR-N58	rna-XM_010749433.3	gene-LOC104933891	LOC104933891	suppressor of cytokine signaling 3, transcript variant X1	413	438	164	-26.57	miRNA: 3' acuUGUAAGUUGCG--ACAGCCACUc 5' ***:|:*||||:||***||||||||* target: 5' gacGCGATCAATGCGACGTCGGTGAt 3'	411	434	-31.8	0.002832	target: 5' CGAUCAAUGCGACGUCGGUGAU 3' |:*||||:||***||||||||* miRNA: 3' GUAAGUUGCGA--CAGCCACUC 5'	no
lcr-miR-N58	rna-XM_019259787.2	gene-LOC104936242	LOC104936242	transcription factor E2F3, transcript variant X2	564	588	179	-27.36	miRNA: 3' acuuGUAAGUUG-CGACAGCCACUc 5' ****:||||*||*|||||||||||* target: 5' atctTATTCCACGGCTGTCGGTGAt 3'	562	585	-32.5	0.003485	target: 5' UAUUCCACGGCUGUCGGUGAU 3' :||||*||*|||||||||||* miRNA: 3' GUAAGUUG-CGACAGCCACUC 5'	no
lcr-miR-N58	rna-XM_010742583.3	gene-igfbp2	igfbp2	insulin like growth factor binding protein 2	259	284	162	-25.52	miRNA: 3' acUUGUAAGUUG-CG--ACAGCCACUc 5' |*:||:*|||:|*||**|||||||||* target: 5' taGACG-TCAGCTGCAGTGTCGGTGAc 3'	260	283	-29.4	0.003153	target: 5' -UCAGCUGCAGUGUCGGUGAC 3' *|||:|*||**|||||||||* miRNA: 3' AAGUUG-CG--ACAGCCACUC 5'	no
lcr-miR-N58	rna-XM_019277579.2	gene-unc80	unc80	unc-80 homolog, NALCN channel complex subunit, transcript variant X13	403	427	171	-32.58	miRNA: 3' acuuGUAAG-UUGCGACAGCCACUc 5' **:*|||||*:|||||||:|||||* target: 5' gagcCATTCTGACGCTGTTGGTGAc 3'	402	425	-36.7	0.000718	target: 5' AUUCUGACGCUGUUGGUGAC 3' ||||*:|||||||:|||||* miRNA: 3' UAAG-UUGCGACAGCCACUC 5'	no
lcr-miR-N58	rna-XM_019277577.2	gene-unc80	unc80	unc-80 homolog, NALCN channel complex subunit, transcript variant X13	403	427	171	-32.58	miRNA: 3' acuuGUAAG-UUGCGACAGCCACUc 5' **:*|||||*:|||||||:|||||* target: 5' gagcCATTCTGACGCTGTTGGTGAc 3'	402	425	-36.7	0.000718	target: 5' AUUCUGACGCUGUUGGUGAC 3' ||||*:|||||||:|||||* miRNA: 3' UAAG-UUGCGACAGCCACUC 5'	no
lcr-miR-N58	rna-XM_010741060.3	gene-hes4	hes4	hes family bHLH transcription factor 4, transcript variant X1	229	250	167	-25.09	miRNA: 3' acUUGUAAGUUGCGACAGCCACUc 5' **||||||:::*|**||||||||| target: 5' ccAACATTTGGAG--GTCGGTGAg 3'	230	253	-28.2	0.005621	target: 5' UUUGGAG--GUCGGUGAGA 3' ||:::*|**|||||||||* miRNA: 3' AAGUUGCGACAGCCACUC- 5'	no
lcr-miR-N58	rna-XM_019260192.2	gene-kidins220	kidins220	kinase D interacting substrate 220, transcript variant X3	39	62	169	-24.37	miRNA: 3' acuuguaAGUUGCGACAGCCACUc 5' ***::**|::|:|:|||||||||* target: 5' gttgttcTTGATGTTGTCGGTGAc 3'	41	64	-29.7	0.004371	target: 5' UUCUUGAUGUUGUCGGUGAC 3' |||**:|:|:|||||||||* miRNA: 3' AAG--UUGCGACAGCCACUC 5'	no
lcr-miR-N58	rna-XM_019277581.2	gene-unc80	unc80	unc-80 homolog, NALCN channel complex subunit, transcript variant X13	403	427	171	-32.58	miRNA: 3' acuuGUAAG-UUGCGACAGCCACUc 5' **:*|||||*:|||||||:|||||* target: 5' gagcCATTCTGACGCTGTTGGTGAc 3'	402	425	-36.7	0.000718	target: 5' AUUCUGACGCUGUUGGUGAC 3' ||||*:|||||||:|||||* miRNA: 3' UAAG-UUGCGACAGCCACUC 5'	no
lcr-miR-N58	rna-XM_027291372.1	gene-unc80	unc80	unc-80 homolog, NALCN channel complex subunit, transcript variant X13	403	427	171	-32.58	miRNA: 3' acuuGUAAG-UUGCGACAGCCACUc 5' **:*|||||*:|||||||:|||||* target: 5' gagcCATTCTGACGCTGTTGGTGAc 3'	402	425	-36.7	0.000718	target: 5' AUUCUGACGCUGUUGGUGAC 3' ||||*:|||||||:|||||* miRNA: 3' UAAG-UUGCGACAGCCACUC 5'	no
lcr-miR-N58	rna-XM_010739283.3	gene-LOC104925620	LOC104925620	WD repeat-containing protein 26	1022	1046	172	-35.14	miRNA: 3' acuuguaAGU-UGCGACAGCCACUc 5' *|::*:*|||*|||:|||||||||| target: 5' ggggggaTCAGACGTTGTCGGTGAg 3'	1022	1045	-34.7	0.002914	target: 5' UCAGACGUUGUCGGUGAGG 3' |**:|||:||||||||||* miRNA: 3' AAGUUGCGACAGCCACUC- 5'	no
lcr-miR-N58	rna-XM_019277593.2	gene-unc80	unc80	unc-80 homolog, NALCN channel complex subunit, transcript variant X13	403	427	171	-32.58	miRNA: 3' acuuGUAAG-UUGCGACAGCCACUc 5' **:*|||||*:|||||||:|||||* target: 5' gagcCATTCTGACGCTGTTGGTGAc 3'	402	425	-36.7	0.000718	target: 5' AUUCUGACGCUGUUGGUGAC 3' ||||*:|||||||:|||||* miRNA: 3' UAAG-UUGCGACAGCCACUC 5'	no
lcr-miR-N58	rna-XM_019277582.2	gene-unc80	unc80	unc-80 homolog, NALCN channel complex subunit, transcript variant X13	403	427	171	-32.58	miRNA: 3' acuuGUAAG-UUGCGACAGCCACUc 5' **:*|||||*:|||||||:|||||* target: 5' gagcCATTCTGACGCTGTTGGTGAc 3'	402	425	-36.7	0.000718	target: 5' AUUCUGACGCUGUUGGUGAC 3' ||||*:|||||||:|||||* miRNA: 3' UAAG-UUGCGACAGCCACUC 5'	no
lcr-miR-N58	rna-XM_019277587.2	gene-unc80	unc80	unc-80 homolog, NALCN channel complex subunit, transcript variant X13	403	427	171	-32.58	miRNA: 3' acuuGUAAG-UUGCGACAGCCACUc 5' **:*|||||*:|||||||:|||||* target: 5' gagcCATTCTGACGCTGTTGGTGAc 3'	402	425	-36.7	0.000718	target: 5' AUUCUGACGCUGUUGGUGAC 3' ||||*:|||||||:|||||* miRNA: 3' UAAG-UUGCGACAGCCACUC 5'	no
lcr-miR-N58	rna-XM_019277589.2	gene-unc80	unc80	unc-80 homolog, NALCN channel complex subunit, transcript variant X13	403	427	171	-32.58	miRNA: 3' acuuGUAAG-UUGCGACAGCCACUc 5' **:*|||||*:|||||||:|||||* target: 5' gagcCATTCTGACGCTGTTGGTGAc 3'	402	425	-36.7	0.000717	target: 5' AUUCUGACGCUGUUGGUGAC 3' ||||*:|||||||:|||||* miRNA: 3' UAAG-UUGCGACAGCCACUC 5'	no
lcr-miR-N58	rna-XM_027282424.1	gene-LOC113746497	LOC113746497	butyrophilin subfamily 2 member A2-like, transcript variant X2	551	574	161	-25.53	miRNA: 3' acuUGUAAGUUGCGACAGCCACUc 5' ***|||**|**:*||||||||||| target: 5' cccACAGACTTTACTGTCGGTGAg 3'	543	566	-31.8	0.005269	target: 5' UGCCCACAGACUUUACUGUCGGUGAGU 3' |*|*****:||****|||||||||||* miRNA: 3' AAG-----UUGC---GACAGCCACUC- 5'	no
lcr-miR-N58	rna-XM_019258993.2	gene-ccdc18	ccdc18	coiled-coil domain containing 18, transcript variant X1	425	449	161	-28.28	miRNA: 3' acUUGUAA-GUUGCGACAGCCACUc 5' ||:|::||*|*|:|||||:|||||* target: 5' tgGATGTTCCCATGCTGTTGGTGAc 3'	424	447	-33.8	0.0011	target: 5' GUUCCCAUGCUGUUGGUGAC 3' :|||**|:|||||:|||||* miRNA: 3' UAAGU-UGCGACAGCCACUC 5'	no
lcr-miR-N58	rna-XM_019277590.2	gene-unc80	unc80	unc-80 homolog, NALCN channel complex subunit, transcript variant X13	403	427	171	-32.58	miRNA: 3' acuuGUAAG-UUGCGACAGCCACUc 5' **:*|||||*:|||||||:|||||* target: 5' gagcCATTCTGACGCTGTTGGTGAc 3'	402	425	-36.7	0.000718	target: 5' AUUCUGACGCUGUUGGUGAC 3' ||||*:|||||||:|||||* miRNA: 3' UAAG-UUGCGACAGCCACUC 5'	no
lcr-miR-N58	rna-XM_019260191.2	gene-kidins220	kidins220	kinase D interacting substrate 220, transcript variant X3	39	62	169	-24.37	miRNA: 3' acuuguaAGUUGCGACAGCCACUc 5' ***::**|::|:|:|||||||||* target: 5' gttgttcTTGATGTTGTCGGTGAc 3'	41	64	-29.7	0.004371	target: 5' UUCUUGAUGUUGUCGGUGAC 3' |||**:|:|:|||||||||* miRNA: 3' AAG--UUGCGACAGCCACUC 5'	no
lcr-miR-N58	rna-XM_019260189.2	gene-kidins220	kidins220	kinase D interacting substrate 220, transcript variant X3	39	62	169	-24.37	miRNA: 3' acuuguaAGUUGCGACAGCCACUc 5' ***::**|::|:|:|||||||||* target: 5' gttgttcTTGATGTTGTCGGTGAc 3'	41	64	-29.7	0.004371	target: 5' UUCUUGAUGUUGUCGGUGAC 3' |||**:|:|:|||||||||* miRNA: 3' AAG--UUGCGACAGCCACUC 5'	no
lcr-miR-N58	rna-XM_010738077.3	gene-LOC104924661	LOC104924661	putative testis-specific Y-encoded-like protein 3, transcript variant X3	334	359	168	-28.75	miRNA: 3' acUUGUAAGU-UGCG-ACAGCCACUc 5' **|:|*|*:|*||||*|||||||||| target: 5' acAGCCTCTACACGCATGTCGGTGAg 3'	322	345	-33.5	0.002317	target: 5' CGCACAACAGCCUCUACACGCAUGUCGGUGAGA 3' **||*************||||*||||||||||* miRNA: 3' AAGU-------------UGCG-ACAGCCACUC- 5'	no
lcr-miR-N58	rna-XM_019277585.2	gene-unc80	unc80	unc-80 homolog, NALCN channel complex subunit, transcript variant X13	403	427	171	-32.58	miRNA: 3' acuuGUAAG-UUGCGACAGCCACUc 5' **:*|||||*:|||||||:|||||* target: 5' gagcCATTCTGACGCTGTTGGTGAc 3'	402	425	-36.7	0.000718	target: 5' AUUCUGACGCUGUUGGUGAC 3' ||||*:|||||||:|||||* miRNA: 3' UAAG-UUGCGACAGCCACUC 5'	no
lcr-miR-N58	rna-XM_019255180.2	gene-LOC104924661	LOC104924661	putative testis-specific Y-encoded-like protein 3, transcript variant X3	334	359	168	-28.75	miRNA: 3' acUUGUAAGU-UGCG-ACAGCCACUc 5' **|:|*|*:|*||||*|||||||||| target: 5' acAGCCTCTACACGCATGTCGGTGAg 3'	322	345	-33.5	0.002317	target: 5' CGCACAACAGCCUCUACACGCAUGUCGGUGAGA 3' **||*************||||*||||||||||* miRNA: 3' AAGU-------------UGCG-ACAGCCACUC- 5'	no
lcr-miR-N58	rna-XM_019277578.2	gene-unc80	unc80	unc-80 homolog, NALCN channel complex subunit, transcript variant X13	403	427	171	-32.58	miRNA: 3' acuuGUAAG-UUGCGACAGCCACUc 5' **:*|||||*:|||||||:|||||* target: 5' gagcCATTCTGACGCTGTTGGTGAc 3'	402	425	-36.7	0.000718	target: 5' AUUCUGACGCUGUUGGUGAC 3' ||||*:|||||||:|||||* miRNA: 3' UAAG-UUGCGACAGCCACUC 5'	no
lcr-miR-N58	rna-XM_027282422.1	gene-LOC113746497	LOC113746497	butyrophilin subfamily 2 member A2-like, transcript variant X2	551	574	161	-25.53	miRNA: 3' acuUGUAAGUUGCGACAGCCACUc 5' ***|||**|**:*||||||||||| target: 5' cccACAGACTTTACTGTCGGTGAg 3'	543	566	-31.8	0.005247	target: 5' UGCCCACAGACUUUACUGUCGGUGAGU 3' |*|*****:||****|||||||||||* miRNA: 3' AAG-----UUGC---GACAGCCACUC- 5'	no
lcr-miR-N58	rna-XM_019276000.2	gene-nol6	nol6	nucleolar protein 6	167	193	164	-22.24	miRNA: 3' acUUGUAAGU-UGCGAC--AGCCACUc 5' *||*||*|||*|:|:||**|||||||* target: 5' agACCAATCACATGTTGTTTCGGTGAa 3'	167	190	-26.1	0.005894	target: 5' AUCACAUGUUGUUUCGGUGAA 3' *|||*|:|:||**|||||||* miRNA: 3' AAGU-UGCGAC--AGCCACUC 5'	no
lcr-miR-N58	rna-XM_019277580.2	gene-unc80	unc80	unc-80 homolog, NALCN channel complex subunit, transcript variant X13	403	427	171	-32.58	miRNA: 3' acuuGUAAG-UUGCGACAGCCACUc 5' **:*|||||*:|||||||:|||||* target: 5' gagcCATTCTGACGCTGTTGGTGAc 3'	402	425	-36.7	0.000718	target: 5' AUUCUGACGCUGUUGGUGAC 3' ||||*:|||||||:|||||* miRNA: 3' UAAG-UUGCGACAGCCACUC 5'	no
lcr-miR-N58	rna-XM_010738691.3	gene-LOC104925139	LOC104925139	parapinopsin	45	68	177	-24.59	miRNA: 3' acuUGUAAGUUGCGACAGCCACUc 5' ***||*|*|||||:*||||||||* target: 5' gtcACCTGCAACGTCGTCGGTGAa 3'	39	62	-29.6	4.5e-05	target: 5' GUCACCUGCAACGUCGUCGGUGAA 3' **||****|||||:*||||||||* miRNA: 3' --GUAA--GUUGCGACAGCCACUC 5'	no
lcr-miR-N58	rna-XM_027279500.1	gene-gnl3	gnl3	G protein nucleolar 3	334	357	170	-28.93	miRNA: 3' acuuguAAGUUGCGACAGCCACUc 5' ****:*||*:|:|:|||||||||| target: 5' cttctcTTGGATGTTGTCGGTGAg 3'	339	362	-31	0.001263	target: 5' UUGGAUGUUGUCGGUGAGU 3' ||*:|:|:||||||||||* miRNA: 3' AAGUUGCGACAGCCACUC- 5'	no
lcr-miR-N58	rna-XM_019260190.2	gene-kidins220	kidins220	kinase D interacting substrate 220, transcript variant X3	39	62	169	-24.37	miRNA: 3' acuuguaAGUUGCGACAGCCACUc 5' ***::**|::|:|:|||||||||* target: 5' gttgttcTTGATGTTGTCGGTGAc 3'	41	64	-29.7	0.004371	target: 5' UUCUUGAUGUUGUCGGUGAC 3' |||**:|:|:|||||||||* miRNA: 3' AAG--UUGCGACAGCCACUC 5'	no
lcr-miR-N58	rna-XM_019277576.2	gene-unc80	unc80	unc-80 homolog, NALCN channel complex subunit, transcript variant X13	403	427	171	-32.58	miRNA: 3' acuuGUAAG-UUGCGACAGCCACUc 5' **:*|||||*:|||||||:|||||* target: 5' gagcCATTCTGACGCTGTTGGTGAc 3'	402	425	-36.7	0.000718	target: 5' AUUCUGACGCUGUUGGUGAC 3' ||||*:|||||||:|||||* miRNA: 3' UAAG-UUGCGACAGCCACUC 5'	no
lcr-miR-N58	rna-XM_019277592.2	gene-unc80	unc80	unc-80 homolog, NALCN channel complex subunit, transcript variant X13	403	427	171	-32.58	miRNA: 3' acuuGUAAG-UUGCGACAGCCACUc 5' **:*|||||*:|||||||:|||||* target: 5' gagcCATTCTGACGCTGTTGGTGAc 3'	402	425	-36.7	0.000718	target: 5' AUUCUGACGCUGUUGGUGAC 3' ||||*:|||||||:|||||* miRNA: 3' UAAG-UUGCGACAGCCACUC 5'	no
lcr-miR-N58	rna-XM_019259788.2	gene-LOC104936242	LOC104936242	transcription factor E2F3, transcript variant X2	564	588	179	-27.36	miRNA: 3' acuuGUAAGUUG-CGACAGCCACUc 5' ****:||||*||*|||||||||||* target: 5' atctTATTCCACGGCTGTCGGTGAt 3'	562	585	-32.5	0.003485	target: 5' UAUUCCACGGCUGUCGGUGAU 3' :||||*||*|||||||||||* miRNA: 3' GUAAGUUG-CGACAGCCACUC 5'	no
lcr-miR-N58	rna-XM_019277586.2	gene-unc80	unc80	unc-80 homolog, NALCN channel complex subunit, transcript variant X13	403	427	171	-32.58	miRNA: 3' acuuGUAAG-UUGCGACAGCCACUc 5' **:*|||||*:|||||||:|||||* target: 5' gagcCATTCTGACGCTGTTGGTGAc 3'	402	425	-36.7	0.000718	target: 5' AUUCUGACGCUGUUGGUGAC 3' ||||*:|||||||:|||||* miRNA: 3' UAAG-UUGCGACAGCCACUC 5'	no
lcr-miR-N58	rna-XM_010741069.3	gene-hes4	hes4	hes family bHLH transcription factor 4, transcript variant X1	229	250	167	-25.09	miRNA: 3' acUUGUAAGUUGCGACAGCCACUc 5' **||||||:::*|**||||||||| target: 5' ccAACATTTGGAG--GTCGGTGAg 3'	230	253	-28.2	0.005621	target: 5' UUUGGAG--GUCGGUGAGA 3' ||:::*|**|||||||||* miRNA: 3' AAGUUGCGACAGCCACUC- 5'	no
lcr-miR-N58	rna-XM_010738076.3	gene-LOC104924661	LOC104924661	putative testis-specific Y-encoded-like protein 3, transcript variant X3	334	359	168	-28.75	miRNA: 3' acUUGUAAGU-UGCG-ACAGCCACUc 5' **|:|*|*:|*||||*|||||||||| target: 5' acAGCCTCTACACGCATGTCGGTGAg 3'	322	345	-33.5	0.002317	target: 5' CGCACAACAGCCUCUACACGCAUGUCGGUGAGA 3' **||*************||||*||||||||||* miRNA: 3' AAGU-------------UGCG-ACAGCCACUC- 5'	no
lcr-miR-N58	rna-XM_019258992.2	gene-ccdc18	ccdc18	coiled-coil domain containing 18, transcript variant X1	425	449	161	-28.28	miRNA: 3' acUUGUAA-GUUGCGACAGCCACUc 5' ||:|::||*|*|:|||||:|||||* target: 5' tgGATGTTCCCATGCTGTTGGTGAc 3'	424	447	-33.8	0.0011	target: 5' GUUCCCAUGCUGUUGGUGAC 3' :|||**|:|||||:|||||* miRNA: 3' UAAGU-UGCGACAGCCACUC 5'	no
lcr-miR-N58	rna-XM_010743976.3	gene-LOC104929452	LOC104929452	replication protein A 70 kDa DNA-binding subunit	253	278	169	-23.81	miRNA: 3' acuuguAAGUU--GCGACAGCCACUc 5' |**:**|||||**|*||||||||||* target: 5' tttggtTTCAAATCTCTGTCGGTGAt 3'	254	277	-27.5	0.008646	target: 5' -UUCAAAUCUCUGUCGGUGAU 3' *|||||****||||||||||* miRNA: 3' UAAGUUGC--GACAGCCACUC 5'	no
lcr-miR-N58	rna-XM_019277591.2	gene-unc80	unc80	unc-80 homolog, NALCN channel complex subunit, transcript variant X13	403	427	171	-32.58	miRNA: 3' acuuGUAAG-UUGCGACAGCCACUc 5' **:*|||||*:|||||||:|||||* target: 5' gagcCATTCTGACGCTGTTGGTGAc 3'	402	425	-36.7	0.000718	target: 5' AUUCUGACGCUGUUGGUGAC 3' ||||*:|||||||:|||||* miRNA: 3' UAAG-UUGCGACAGCCACUC 5'	no
lcr-miR-N58	rna-XM_019277583.2	gene-unc80	unc80	unc-80 homolog, NALCN channel complex subunit, transcript variant X13	403	427	171	-32.58	miRNA: 3' acuuGUAAG-UUGCGACAGCCACUc 5' **:*|||||*:|||||||:|||||* target: 5' gagcCATTCTGACGCTGTTGGTGAc 3'	402	425	-36.7	0.000718	target: 5' AUUCUGACGCUGUUGGUGAC 3' ||||*:|||||||:|||||* miRNA: 3' UAAG-UUGCGACAGCCACUC 5'	no
lcr-miR-N58	rna-XM_027289488.1	gene-LOC104933891	LOC104933891	suppressor of cytokine signaling 3, transcript variant X1	413	438	164	-26.57	miRNA: 3' acuUGUAAGUUGCG--ACAGCCACUc 5' ***:|:*||||:||***||||||||* target: 5' gacGCGATCAATGCGACGTCGGTGAt 3'	411	434	-31.8	0.002832	target: 5' CGAUCAAUGCGACGUCGGUGAU 3' |:*||||:||***||||||||* miRNA: 3' GUAAGUUGCGA--CAGCCACUC 5'	no
lcr-miR-N58	rna-XM_019260187.2	gene-kidins220	kidins220	kinase D interacting substrate 220, transcript variant X3	39	62	169	-24.37	miRNA: 3' acuuguaAGUUGCGACAGCCACUc 5' ***::**|::|:|:|||||||||* target: 5' gttgttcTTGATGTTGTCGGTGAc 3'	41	64	-29.7	0.004371	target: 5' UUCUUGAUGUUGUCGGUGAC 3' |||**:|:|:|||||||||* miRNA: 3' AAG--UUGCGACAGCCACUC 5'	no
lcr-miR-N65	rna-XM_019264316.2	gene-rnf5	rnf5	ring finger protein 5	758	776	181	-29.39	miRNA: 3' uaGACACUGAACGAGAAUu 5' ||:|||||||||||||||| target: 5' atTTGTGACTTGCTCTTAa 3'	757	775	-33.3	0.001796	target: 5' UGACUUGCUCUUAAA 3' ||||||||||||||* miRNA: 3' ACUGAACGAGAAUU- 5'	no
lcr-miR-N65	rna-XM_019264557.2	gene-LOC109139809	LOC109139809	cytokine-like protein 1	138	157	164	-23.14	miRNA: 3' uaGACAC-UGAACGAGAAUu 5' |*|||||**:|||||||||| target: 5' aaCTGTGCTTTTGCTCTTAa 3'	139	157	-25.1	0.009197	target: 5' GCUUUUGCUCUUAAA 3' |**:||||||||||* miRNA: 3' CU-GAACGAGAAUU- 5'	no
lcr-miR-N65	rna-XM_010735924.3	gene-LOC104922961	LOC104922961	phosphoglucomutase-like protein 5	356	374	161	-24.04	miRNA: 3' uaGACACUGAACGAGAAUu 5' :|:||||:||||||:|||* target: 5' gtTTGTGGCTTGCTTTTAt 3'	355	373	-29.4	0.003042	target: 5' UGGCUUGCUUUUAU 3' ||:||||||:|||* miRNA: 3' ACUGAACGAGAAUU 5'	no
lcr-miR-N82	rna-XM_027273939.1	gene-LOC104938060	LOC104938060	disks large homolog 4, transcript variant X6	360	380	164	-28.89	miRNA: 3' ucuggGUCUCCGUCUGGGUCu 5' :****||||||**|||||||* target: 5' gacagCAGAGGGTGACCCAGc 3'	358	378	-38.3	6.6e-05	target: 5' GCAGAGGGUGACCCAGC 3' *||||||**|||||||* miRNA: 3' -GUCUCCGUCUGGGUCU 5'	no
lcr-miR-N82	rna-XM_027291414.1	gene-erbb4	erbb4	erb-b2 receptor tyrosine kinase 4, transcript variant X1	3437	3458	162	-26.84	miRNA: 3' ucUGGGUCU-CCGUCUGGGUCu 5' **|*::|||**||||||||||: target: 5' taAATTAGACTGCAGACCCAGg 3'	3429	3449	-33.4	0.009827	target: 5' AAAUUAGACUGCAGACCCAGGC 3' *****|||**||||||||||:* miRNA: 3' -----UCUC-CGUCUGGGUCU- 5'	no
lcr-miR-N82	rna-XM_027275135.1	gene-meis2	meis2	Meis homeobox 2, transcript variant X2	2329	2349	163	-32.1	miRNA: 3' ucUGGGUCUCCGUCUGGGUCu 5' |||||||****|||||||||: target: 5' agACCCAATCCCAGACCCAGg 3'	2321	2341	-35.3	0.003167	target: 5' AGACCCAAUCCCAGACCCAGGC 3' |||********|||||||||:* miRNA: 3' UCUCC------GUCUGGGUCU- 5'	no
lcr-miR-N82	rna-XM_027275214.1	gene-e2f2	e2f2	E2F transcription factor 2, transcript variant X2	804	824	161	-26.05	miRNA: 3' ucugGGUCUCCGUCUGGGUCu 5' ||**|::||**|||||||||| target: 5' agtaCTGGACCCAGACCCAGa 3'	796	816	-32.1	0.004918	target: 5' CCAGUACUGGACCCAGACCCAGAG 3' ||||****||***||||||||||* miRNA: 3' GGUCU---CC---GUCUGGGUCU- 5'	no
lcr-miR-N82	rna-XM_027285136.1	gene-LOC104929637	LOC104929637	receptor-type tyrosine-protein phosphatase S-like, transcript variant X4	2089	2110	162	-31.51	miRNA: 3' ucUG-GGUCUCCGUCUGGGUCu 5' :*||*::|||||||||||:||* target: 5' gtACATTAGAGGCAGACCTAGt 3'	2082	2102	-35.1	0.002375	target: 5' UACAUUAGAGGCAGACCUAGU 3' ****::|||||||||||:||* miRNA: 3' ----GGUCUCCGUCUGGGUCU 5'	no
lcr-miR-N82	rna-XM_019279124.2	gene-paqr6	paqr6	progestin and adipoQ receptor family member 6, transcript variant X2	198	221	162	-25.73	miRNA: 3' ucUGGGUCUCCG---UCUGGGUCu 5' **||:||||*||***:|||||||* target: 5' ttACTCAGAAGCTGAGGACCCAGt 3'	199	219	-30	0.00496	target: 5' AGAAGCUGAGGACCCAGU 3' |||*||***:|||||||* miRNA: 3' UCUCCG---UCUGGGUCU 5'	no
lcr-miR-N82	rna-XM_027281140.1	gene-LOC104932139	LOC104932139	histone-binding protein RBBP7	30	52	161	-28.46	miRNA: 3' ucuGGGUCUC--CGUCUGGGUCu 5' |**|||*|||***|||||||||* target: 5' actCCCTGAGCTCCAGACCCAGc 3'	32	52	-29.9	0.000917	target: 5' UGAGCUCCAGACCCAGC 3' *|||***|||||||||* miRNA: 3' UCUCC--GUCUGGGUCU 5'	no
lcr-miR-N82	rna-XM_010730829.3	gene-nop16	nop16	NOP16 nucleolar protein	66	86	164	-31.21	miRNA: 3' ucuggGUCUCCGUCUGGGUCu 5' **|**||**|||||||||||: target: 5' caagaCATTGGCAGACCCAGg 3'	50	70	-37	1.6e-05	target: 5' GUGACAGAAGCAAGACAUUGGCAGACCCAGGA 3' **||***************|||||||||||:* miRNA: 3' GUCU---------------CCGUCUGGGUCU- 5'	no
lcr-miR-N82	rna-XM_027285143.1	gene-LOC104929637	LOC104929637	receptor-type tyrosine-protein phosphatase S-like, transcript variant X4	2089	2110	162	-31.51	miRNA: 3' ucUG-GGUCUCCGUCUGGGUCu 5' :*||*::|||||||||||:||* target: 5' gtACATTAGAGGCAGACCTAGt 3'	2082	2102	-35.1	0.002375	target: 5' UACAUUAGAGGCAGACCUAGU 3' ****::|||||||||||:||* miRNA: 3' ----GGUCUCCGUCUGGGUCU 5'	no
lcr-miR-N82	rna-XM_019254939.2	gene-LOC104922022	LOC104922022	syntaxin-binding protein 5, transcript variant X4	1827	1850	165	-29.43	miRNA: 3' ucUGGGU--CUC-CGUCUGGGUCu 5' **||::|**|||*||||||||||: target: 5' taACTTATGGAGTGCAGACCCAGg 3'	1827	1847	-33.8	0.005033	target: 5' AUGGAGUGCAGACCCAGGG 3' **:|||*||||||||||:* miRNA: 3' --UCUC-CGUCUGGGUCU- 5'	no
lcr-miR-N82	rna-XM_027281103.1	gene-LOC104932418	LOC104932418	USP6 N-terminal-like protein, transcript variant X3	1181	1200	161	-23.79	miRNA: 3' ucUGGGUCUCCGUCUGGGUCu 5' :*||*|*|||*:||||||||* target: 5' gaACAC-GAGTTAGACCCAGt 3'	618	638	-30.6	0.009058	target: 5' CAGUAGAACACGAGUUAGACCCAGU 3' ||*********|||*:||||||||* miRNA: 3' GU---------CUCCGUCUGGGUCU 5'	no
lcr-miR-N82	rna-XM_027273947.1	gene-LOC104938060	LOC104938060	disks large homolog 4, transcript variant X6	360	380	164	-28.89	miRNA: 3' ucuggGUCUCCGUCUGGGUCu 5' :****||||||**|||||||* target: 5' gacagCAGAGGGTGACCCAGc 3'	358	378	-38.3	6.6e-05	target: 5' GCAGAGGGUGACCCAGC 3' *||||||**|||||||* miRNA: 3' -GUCUCCGUCUGGGUCU 5'	no
lcr-miR-N82	rna-XM_027273538.1	gene-LOC104939317	LOC104939317	follistatin-related protein 1, transcript variant X1	45	65	171	-29.51	miRNA: 3' ucUGGGUCUCCGUCUGGGUCu 5' |||*|||||**|||||||||* target: 5' agAACCAGAACCAGACCCAGc 3'	44	64	-31.6	2.2e-05	target: 5' CAGAACCAGACCCAGC 3' ||||**|||||||||* miRNA: 3' GUCUCCGUCUGGGUCU 5'	no
lcr-miR-N82	rna-XM_027273950.1	gene-LOC104938060	LOC104938060	disks large homolog 4, transcript variant X6	360	380	164	-28.89	miRNA: 3' ucuggGUCUCCGUCUGGGUCu 5' :****||||||**|||||||* target: 5' gacagCAGAGGGTGACCCAGc 3'	358	378	-38.3	6.6e-05	target: 5' GCAGAGGGUGACCCAGC 3' *||||||**|||||||* miRNA: 3' -GUCUCCGUCUGGGUCU 5'	no
lcr-miR-N82	rna-XM_019254862.2	gene-LOC104928063	LOC104928063	sodium channel subunit beta-1	869	889	171	-34.04	miRNA: 3' ucUGGGUCUCCGUCUGGGUCu 5' |||:||*|:||*||||||||| target: 5' agATCCCGGGGAAGACCCAGa 3'	868	888	-37	0.000662	target: 5' CCGGGGAAGACCCAGAA 3' |*|:||*|||||||||* miRNA: 3' GUCUCCGUCUGGGUCU- 5'	no
lcr-miR-N82	rna-XM_027285135.1	gene-LOC104929637	LOC104929637	receptor-type tyrosine-protein phosphatase S-like, transcript variant X4	2089	2110	162	-31.51	miRNA: 3' ucUG-GGUCUCCGUCUGGGUCu 5' :*||*::|||||||||||:||* target: 5' gtACATTAGAGGCAGACCTAGt 3'	2082	2102	-35.1	0.002375	target: 5' UACAUUAGAGGCAGACCUAGU 3' ****::|||||||||||:||* miRNA: 3' ----GGUCUCCGUCUGGGUCU 5'	no
lcr-miR-N82	rna-XM_019264019.2	gene-LOC104929428	LOC104929428	transcription factor Sox-1a, transcript variant X1	2513	2532	172	-35.09	miRNA: 3' ucuGGGUCUCCGUCUGGGUCu 5' |**|||:||*||||||||||| target: 5' accCCCGGA-GCAGACCCAGa 3'	2508	2528	-39.9	0.000713	target: 5' CCCGGA-GCAGACCCAGAA 3' |**:||*|||||||||||* miRNA: 3' G--UCUCCGUCUGGGUCU- 5'	no
lcr-miR-N82	rna-XM_027286650.1	gene-LOC104939032	LOC104939032	bcl-2/adenovirus E1B 19 kDa-interacting protein 2-like protein, transcript variant X1	28	48	162	-30.51	miRNA: 3' ucuggguCUCCGUCUGGGUCu 5' *******||*||||||||||: target: 5' tccaggtGAAGCAGACCCAGg 3'	24	44	-33.7	0.000155	target: 5' CAGGUGAAGCAGACCCAGGG 3' |||:****||||||||||:* miRNA: 3' GUCUC---CGUCUGGGUCU- 5'	no
lcr-miR-N82	rna-XM_010755503.3	gene-LOC104939027	LOC104939027	RNA-binding protein 38	67	87	162	-29.11	miRNA: 3' ucuGGGUCUCCGUCUGGGUCu 5' *|*||||*:||**|||||||* target: 5' tgcCCCACGGGGTGACCCAGc 3'	67	87	-33.6	0.001998	target: 5' ACGGGGUGACCCAGC 3' |*:||**|||||||* miRNA: 3' UCUCCGUCUGGGUCU 5'	no
lcr-miR-N82	rna-XM_027289038.1	gene-cep131	cep131	centrosomal protein 131, transcript variant X2	1908	1929	165	-36.32	miRNA: 3' ucuGGGUCU-CCGUCUGGGUCu 5' |**||||||*|||||||:|||: target: 5' aatCCCAGACGGCAGACTCAGg 3'	1909	1929	-37.5	0.000712	target: 5' AGACGGCAGACUCAGGC 3' |||*|||||||:|||:* miRNA: 3' UCU-CCGUCUGGGUCU- 5'	no
lcr-miR-N82	rna-XM_010729610.3	gene-LOC104918005	LOC104918005	interferon-induced very large GTPase 1	343	361	160	-28.82	miRNA: 3' ucUGGGUCUCCGUCUGGGUCu 5' :*|||::|:|**||||||||: target: 5' gcACCTGGGG--AGACCCAGg 3'	304	324	-27.7	0.005811	target: 5' CUGGGG-AGACCCAGGA 3' |*|:||*||||||||:* miRNA: 3' GUCUCCGUCUGGGUCU- 5'	no
lcr-miR-N82	rna-XM_010757002.3	gene-e2f2	e2f2	E2F transcription factor 2, transcript variant X2	804	824	161	-26.05	miRNA: 3' ucugGGUCUCCGUCUGGGUCu 5' ||**|::||**|||||||||| target: 5' agtaCTGGACCCAGACCCAGa 3'	796	816	-32.1	0.004918	target: 5' CCAGUACUGGACCCAGACCCAGAG 3' ||||****||***||||||||||* miRNA: 3' GGUCU---CC---GUCUGGGUCU- 5'	no
lcr-miR-N82	rna-XM_027275133.1	gene-meis2	meis2	Meis homeobox 2, transcript variant X2	2329	2349	163	-32.1	miRNA: 3' ucUGGGUCUCCGUCUGGGUCu 5' |||||||****|||||||||: target: 5' agACCCAATCCCAGACCCAGg 3'	2321	2341	-35.3	0.003167	target: 5' AGACCCAAUCCCAGACCCAGGC 3' |||********|||||||||:* miRNA: 3' UCUCC------GUCUGGGUCU- 5'	no
lcr-miR-N82	rna-XM_010747888.3	gene-etfb	etfb	electron transfer flavoprotein subunit beta	595	615	163	-27.9	miRNA: 3' ucUGGGUCUCCGUCUGGGUCu 5' **::||*|**||||||||||| target: 5' ctGTCCTGCAGCAGACCCAGa 3'	580	600	-31.7	0.003019	target: 5' U-GAGAAACACUGUCCUGCAGCAGACCCAGAC 3' :*|||***************|||||||||||* miRNA: 3' GUCUC---------------CGUCUGGGUCU- 5'	no
lcr-miR-N82	rna-XM_027279736.1	gene-arhgef6	arhgef6	Rac/Cdc42 guanine nucleotide exchange factor 6, transcript variant X1	1682	1702	162	-27.67	miRNA: 3' ucuGGGUCUCCGUCUGGGUCu 5' :**|:|*|:|*:||||||||* target: 5' gacCTCTGGGTTAGACCCAGc 3'	1680	1700	-32.6	0.00653	target: 5' CUGGGUUAGACCCAGC 3' **:||*:||||||||* miRNA: 3' UCUCC-GUCUGGGUCU 5'	no
lcr-miR-N82	rna-XM_019276557.2	gene-dtx1	dtx1	deltex E3 ubiquitin ligase 1, transcript variant X3	2617	2637	171	-31.58	miRNA: 3' ucUGGGUCUCCGUCUGGGUCu 5' *|||||||:*|:*|||||||* target: 5' tgACCCAGGCGTCGACCCAGt 3'	2615	2635	-34.5	0.005313	target: 5' AGGCGUCGACCCAGU 3' ||:*|:*|||||||* miRNA: 3' UCUCCGUCUGGGUCU 5'	no
lcr-miR-N82	rna-XM_027281104.1	gene-LOC104932418	LOC104932418	USP6 N-terminal-like protein, transcript variant X3	1181	1200	161	-23.79	miRNA: 3' ucUGGGUCUCCGUCUGGGUCu 5' :*||*|*|||*:||||||||* target: 5' gaACAC-GAGTTAGACCCAGt 3'	618	638	-30.6	0.009058	target: 5' CAGUAGAACACGAGUUAGACCCAGU 3' ||*********|||*:||||||||* miRNA: 3' GU---------CUCCGUCUGGGUCU 5'	no
lcr-miR-N82	rna-XM_027273942.1	gene-LOC104938060	LOC104938060	disks large homolog 4, transcript variant X6	360	380	164	-28.89	miRNA: 3' ucuggGUCUCCGUCUGGGUCu 5' :****||||||**|||||||* target: 5' gacagCAGAGGGTGACCCAGc 3'	358	378	-38.3	6.6e-05	target: 5' GCAGAGGGUGACCCAGC 3' *||||||**|||||||* miRNA: 3' -GUCUCCGUCUGGGUCU 5'	no
lcr-miR-N82	rna-XM_027282732.1	gene-st7	st7	suppression of tumorigenicity 7, transcript variant X3	14	34	169	-30.72	miRNA: 3' ucugGGUCUCCGUCUGGGUCu 5' *|:*|||||**|||||||||: target: 5' cggaCCAGAATCAGACCCAGg 3'	14	34	-33.1	0.000203	target: 5' CAGAAUCAGACCCAGGA 3' ||||**|||||||||:* miRNA: 3' GUCUCCGUCUGGGUCU- 5'	no
lcr-miR-N82	rna-XM_019273501.2	gene-LOC104928754	LOC104928754	uncharacterized protein C11orf95 homolog, transcript variant X1	546	567	170	-37.4	miRNA: 3' ucUGGGU-CUCCGUCUGGGUCu 5' |||:|||*||||*:|||||||: target: 5' agATCCAGGAGGGGGACCCAGg 3'	545	565	-40	0.000248	target: 5' CAGGAGGGGGACCCAGGA 3' ||*||||*:|||||||:* miRNA: 3' GU-CUCCGUCUGGGUCU- 5'	no
lcr-miR-N82	rna-XM_027285145.1	gene-LOC104929637	LOC104929637	receptor-type tyrosine-protein phosphatase S-like, transcript variant X4	2089	2110	162	-31.51	miRNA: 3' ucUG-GGUCUCCGUCUGGGUCu 5' :*||*::|||||||||||:||* target: 5' gtACATTAGAGGCAGACCTAGt 3'	2082	2102	-35.1	0.002375	target: 5' UACAUUAGAGGCAGACCUAGU 3' ****::|||||||||||:||* miRNA: 3' ----GGUCUCCGUCUGGGUCU 5'	no
lcr-miR-N82	rna-XM_019259299.2	gene-LOC104932572	LOC104932572	beta-1,4 N-acetylgalactosaminyltransferase 1, transcript variant X2	2037	2057	169	-36.54	miRNA: 3' ucugGGUCUCCGUCUGGGUCu 5' ||:*:|*||||:||||||||| target: 5' aggaTCTGAGGTAGACCCAGa 3'	2035	2055	-39.2	0.000398	target: 5' U-GAGGUAGACCCAGAU 3' :*||||:|||||||||* miRNA: 3' GUCUCCGUCUGGGUCU- 5'	no
lcr-miR-N82	rna-XM_019273052.2	gene-LOC104938060	LOC104938060	disks large homolog 4, transcript variant X6	360	380	164	-28.89	miRNA: 3' ucuggGUCUCCGUCUGGGUCu 5' :****||||||**|||||||* target: 5' gacagCAGAGGGTGACCCAGc 3'	358	378	-38.3	6.6e-05	target: 5' GCAGAGGGUGACCCAGC 3' *||||||**|||||||* miRNA: 3' -GUCUCCGUCUGGGUCU 5'	no
lcr-miR-N82	rna-XM_027281105.1	gene-LOC104932418	LOC104932418	USP6 N-terminal-like protein, transcript variant X3	1181	1200	161	-23.79	miRNA: 3' ucUGGGUCUCCGUCUGGGUCu 5' :*||*|*|||*:||||||||* target: 5' gaACAC-GAGTTAGACCCAGt 3'	618	638	-30.6	0.009058	target: 5' CAGUAGAACACGAGUUAGACCCAGU 3' ||*********|||*:||||||||* miRNA: 3' GU---------CUCCGUCUGGGUCU 5'	no
lcr-miR-N82	rna-XM_027282737.1	gene-st7	st7	suppression of tumorigenicity 7, transcript variant X3	14	34	169	-30.72	miRNA: 3' ucugGGUCUCCGUCUGGGUCu 5' *|:*|||||**|||||||||: target: 5' cggaCCAGAATCAGACCCAGg 3'	14	34	-33.1	0.000203	target: 5' CAGAAUCAGACCCAGGA 3' ||||**|||||||||:* miRNA: 3' GUCUCCGUCUGGGUCU- 5'	no
lcr-miR-N82	rna-XM_019273502.2	gene-LOC104928754	LOC104928754	uncharacterized protein C11orf95 homolog, transcript variant X1	546	567	170	-37.4	miRNA: 3' ucUGGGU-CUCCGUCUGGGUCu 5' |||:|||*||||*:|||||||: target: 5' agATCCAGGAGGGGGACCCAGg 3'	545	565	-40	0.000248	target: 5' CAGGAGGGGGACCCAGGA 3' ||*||||*:|||||||:* miRNA: 3' GU-CUCCGUCUGGGUCU- 5'	no
lcr-miR-N82	rna-XM_027273941.1	gene-LOC104938060	LOC104938060	disks large homolog 4, transcript variant X6	360	380	164	-28.89	miRNA: 3' ucuggGUCUCCGUCUGGGUCu 5' :****||||||**|||||||* target: 5' gacagCAGAGGGTGACCCAGc 3'	358	378	-38.3	6.6e-05	target: 5' GCAGAGGGUGACCCAGC 3' *||||||**|||||||* miRNA: 3' -GUCUCCGUCUGGGUCU 5'	no
lcr-miR-N82	rna-XM_027290439.1	gene-acbd6	acbd6	acyl-CoA binding domain containing 6, transcript variant X2	80	101	170	-33.16	miRNA: 3' ucUGGGUCUC-CGUCUGGGUCu 5' **:|:|||||*|*||||||||| target: 5' ctGCTCAGAGAGGAGACCCAGa 3'	127	147	-32.4	0.000161	target: 5' AGAGAGGAGACCCAGAU 3' ||||*|*|||||||||* miRNA: 3' UCUC-CGUCUGGGUCU- 5'	no
lcr-miR-N82	rna-XM_019260110.2	gene-cnnm2	cnnm2	cyclin and CBS domain divalent metal cation transport mediator 2	9	28	165	-32.32	miRNA: 3' ucUGGGUCUCCGUCUGGGUCu 5' :*:|||:|*||*||||||||| target: 5' gaGCCCGGTGG-AGACCCAGa 3'	10	30	-36	0.00196	target: 5' GGUGG-AGACCCAGAC 3' :|*||*|||||||||* miRNA: 3' UCUCCGUCUGGGUCU- 5'	no
lcr-miR-N82	rna-XM_019264779.2	gene-arsb	arsb	arylsulfatase B	871	890	168	-31.76	miRNA: 3' ucuGGGUCUCCGUCUGGGUCu 5' :|*|||||*||*||||||||: target: 5' ggcCCCAG-GGAAGACCCAGg 3'	870	890	-34.7	0.002571	target: 5' CAG-GGAAGACCCAGGA 3' |||*||*||||||||:* miRNA: 3' GUCUCCGUCUGGGUCU- 5'	no
lcr-miR-N82	rna-XM_027273944.1	gene-LOC104938060	LOC104938060	disks large homolog 4, transcript variant X6	360	380	164	-28.89	miRNA: 3' ucuggGUCUCCGUCUGGGUCu 5' :****||||||**|||||||* target: 5' gacagCAGAGGGTGACCCAGc 3'	358	378	-38.3	6.6e-05	target: 5' GCAGAGGGUGACCCAGC 3' *||||||**|||||||* miRNA: 3' -GUCUCCGUCUGGGUCU 5'	no
lcr-miR-N82	rna-XM_027291409.1	gene-erbb4	erbb4	erb-b2 receptor tyrosine kinase 4, transcript variant X1	3437	3458	162	-26.84	miRNA: 3' ucUGGGUCU-CCGUCUGGGUCu 5' **|*::|||**||||||||||: target: 5' taAATTAGACTGCAGACCCAGg 3'	3429	3449	-33.4	0.009827	target: 5' AAAUUAGACUGCAGACCCAGGC 3' *****|||**||||||||||:* miRNA: 3' -----UCUC-CGUCUGGGUCU- 5'	no
lcr-miR-N82	rna-XM_019254936.2	gene-LOC104922022	LOC104922022	syntaxin-binding protein 5, transcript variant X4	1827	1850	165	-29.43	miRNA: 3' ucUGGGU--CUC-CGUCUGGGUCu 5' **||::|**|||*||||||||||: target: 5' taACTTATGGAGTGCAGACCCAGg 3'	1827	1847	-33.8	0.005033	target: 5' AUGGAGUGCAGACCCAGGG 3' **:|||*||||||||||:* miRNA: 3' --UCUC-CGUCUGGGUCU- 5'	no
lcr-miR-N82	rna-XM_010736922.3	gene-sbf1	sbf1	SET binding factor 1, transcript variant X2	3548	3567	161	-27.71	miRNA: 3' ucUGGGUCUCCGUCUGGGUCu 5' **|:||||***|||||||||* target: 5' ccATCCAG-TTCAGACCCAGc 3'	5265	5285	-36.7	0.003093	target: 5' UGGAGCUCUGCAGAACCCAGAC 3' ::|||****||||*|||||||* miRNA: 3' GUCUC----CGUC-UGGGUCU- 5'	no
lcr-miR-N82	rna-XM_027286652.1	gene-LOC104939032	LOC104939032	bcl-2/adenovirus E1B 19 kDa-interacting protein 2-like protein, transcript variant X1	28	48	162	-30.51	miRNA: 3' ucuggguCUCCGUCUGGGUCu 5' *******||*||||||||||: target: 5' tccaggtGAAGCAGACCCAGg 3'	24	44	-33.7	0.000155	target: 5' CAGGUGAAGCAGACCCAGGG 3' |||:****||||||||||:* miRNA: 3' GUCUC---CGUCUGGGUCU- 5'	no
lcr-miR-N82	rna-XM_027275517.1	gene-entpd6	entpd6	ectonucleoside triphosphate diphosphohydrolase 6 (putative)	66	86	165	-29.24	miRNA: 3' ucugGGUCUCCGUCUGGGUCu 5' **:*|||||**|:|||||||| target: 5' ccgaCCAGACCCGGACCCAGa 3'	55	75	-37.7	0.000326	target: 5' CAGACCCGACCAGACCCGGAC 3' ||||******|||||||:||* miRNA: 3' GUCUCC----GUCUGGGUCU- 5'	no
lcr-miR-N82	rna-XM_027273949.1	gene-LOC104938060	LOC104938060	disks large homolog 4, transcript variant X6	360	380	164	-28.89	miRNA: 3' ucuggGUCUCCGUCUGGGUCu 5' :****||||||**|||||||* target: 5' gacagCAGAGGGTGACCCAGc 3'	358	378	-38.3	6.6e-05	target: 5' GCAGAGGGUGACCCAGC 3' *||||||**|||||||* miRNA: 3' -GUCUCCGUCUGGGUCU 5'	no
lcr-miR-N82	rna-XM_027279727.1	gene-arhgef6	arhgef6	Rac/Cdc42 guanine nucleotide exchange factor 6, transcript variant X1	1682	1702	162	-27.67	miRNA: 3' ucuGGGUCUCCGUCUGGGUCu 5' :**|:|*|:|*:||||||||* target: 5' gacCTCTGGGTTAGACCCAGc 3'	1680	1700	-32.6	0.00653	target: 5' CUGGGUUAGACCCAGC 3' **:||*:||||||||* miRNA: 3' UCUCC-GUCUGGGUCU 5'	no
lcr-miR-N82	rna-XM_027282100.1	gene-ogdh	ogdh	oxoglutarate dehydrogenase, transcript variant X2	405	425	163	-26.4	miRNA: 3' ucUGGGUCUCCGUCUGGGUCu 5' **::::*|*|||||||||||| target: 5' ctGTTTTGTGGCAGACCCAGa 3'	401	421	-33.8	0.001252	target: 5' UGUUUUGUGGCAGACCCAGAC 3' ******|*||||||||||||* miRNA: 3' U-----CUCCGUCUGGGUCU- 5'	no
lcr-miR-N82	rna-XM_027291410.1	gene-erbb4	erbb4	erb-b2 receptor tyrosine kinase 4, transcript variant X1	3437	3458	162	-26.84	miRNA: 3' ucUGGGUCU-CCGUCUGGGUCu 5' **|*::|||**||||||||||: target: 5' taAATTAGACTGCAGACCCAGg 3'	3429	3449	-33.4	0.009827	target: 5' AAAUUAGACUGCAGACCCAGGC 3' *****|||**||||||||||:* miRNA: 3' -----UCUC-CGUCUGGGUCU- 5'	no
lcr-miR-N82	rna-XM_027291415.1	gene-erbb4	erbb4	erb-b2 receptor tyrosine kinase 4, transcript variant X1	3437	3458	162	-26.84	miRNA: 3' ucUGGGUCU-CCGUCUGGGUCu 5' **|*::|||**||||||||||: target: 5' taAATTAGACTGCAGACCCAGg 3'	3429	3449	-33.4	0.009827	target: 5' AAAUUAGACUGCAGACCCAGGC 3' *****|||**||||||||||:* miRNA: 3' -----UCUC-CGUCUGGGUCU- 5'	no
lcr-miR-N82	rna-XM_027275134.1	gene-meis2	meis2	Meis homeobox 2, transcript variant X2	2329	2349	163	-32.1	miRNA: 3' ucUGGGUCUCCGUCUGGGUCu 5' |||||||****|||||||||: target: 5' agACCCAATCCCAGACCCAGg 3'	2321	2341	-35.3	0.003167	target: 5' AGACCCAAUCCCAGACCCAGGC 3' |||********|||||||||:* miRNA: 3' UCUCC------GUCUGGGUCU- 5'	no
lcr-miR-N82	rna-XM_027279730.1	gene-arhgef6	arhgef6	Rac/Cdc42 guanine nucleotide exchange factor 6, transcript variant X1	1682	1702	162	-27.67	miRNA: 3' ucuGGGUCUCCGUCUGGGUCu 5' :**|:|*|:|*:||||||||* target: 5' gacCTCTGGGTTAGACCCAGc 3'	1680	1700	-32.6	0.00653	target: 5' CUGGGUUAGACCCAGC 3' **:||*:||||||||* miRNA: 3' UCUCC-GUCUGGGUCU 5'	no
lcr-miR-N82	rna-XM_019257865.2	gene-sbf1	sbf1	SET binding factor 1, transcript variant X2	3548	3567	161	-27.71	miRNA: 3' ucUGGGUCUCCGUCUGGGUCu 5' **|:||||***|||||||||* target: 5' ccATCCAG-TTCAGACCCAGc 3'	5265	5285	-36.7	0.003093	target: 5' UGGAGCUCUGCAGAACCCAGAC 3' ::|||****||||*|||||||* miRNA: 3' GUCUC----CGUC-UGGGUCU- 5'	no
lcr-miR-N82	rna-XM_027285140.1	gene-LOC104929637	LOC104929637	receptor-type tyrosine-protein phosphatase S-like, transcript variant X4	2089	2110	162	-31.51	miRNA: 3' ucUG-GGUCUCCGUCUGGGUCu 5' :*||*::|||||||||||:||* target: 5' gtACATTAGAGGCAGACCTAGt 3'	2082	2102	-35.1	0.002375	target: 5' UACAUUAGAGGCAGACCUAGU 3' ****::|||||||||||:||* miRNA: 3' ----GGUCUCCGUCUGGGUCU 5'	no
lcr-miR-N82	rna-XM_027274944.1	gene-traf3	traf3	TNF receptor associated factor 3	491	511	165	-31.7	miRNA: 3' ucugGGUCUCCGUCUGGGUCu 5' :*:*||||:**|||||||||: target: 5' gagaCCAGGTACAGACCCAGg 3'	489	509	-32.6	0.001838	target: 5' CCAGGUACAGACCCAGGA 3' ||||:**|||||||||:* miRNA: 3' GGUCUCCGUCUGGGUCU- 5'	no
lcr-miR-N82	rna-XM_010754661.3	gene-LOC104938294	LOC104938294	carbohydrate sulfotransferase 8-like, transcript variant X2	24	42	160	-30.28	miRNA: 3' ucUGGGUCUCCGUCUGGGUCu 5' ||||:|**|||::|||||||: target: 5' agACTC--AGGTGGACCCAGg 3'	43	63	-27.6	0.006988	target: 5' CAGGUAGACUCAGGUGGACCCAGGU 3' |||********|||::|||||||:* miRNA: 3' GUC--------UCCGUCUGGGUCU- 5'	no
lcr-miR-N82	rna-XM_027281549.1	gene-LOC104925842	LOC104925842	very-long-chain 3-oxoacyl-CoA reductase-B	32	51	162	-27.56	miRNA: 3' ucuggGUCUCCGUCUGGGUCu 5' :*|**||||||*:|||||||* target: 5' gcaaaCAGAGG-GGACCCAGc 3'	27	47	-31.7	0.003847	target: 5' CAAACAGAGG-GGACCCAGC 3' ****||||||*:|||||||* miRNA: 3' ----GUCUCCGUCUGGGUCU 5'	no
lcr-miR-N82	rna-XM_027285137.1	gene-LOC104929637	LOC104929637	receptor-type tyrosine-protein phosphatase S-like, transcript variant X4	2089	2110	162	-31.51	miRNA: 3' ucUG-GGUCUCCGUCUGGGUCu 5' :*||*::|||||||||||:||* target: 5' gtACATTAGAGGCAGACCTAGt 3'	2082	2102	-35.1	0.002375	target: 5' UACAUUAGAGGCAGACCUAGU 3' ****::|||||||||||:||* miRNA: 3' ----GGUCUCCGUCUGGGUCU 5'	no
lcr-miR-N82	rna-XM_027285142.1	gene-LOC104929637	LOC104929637	receptor-type tyrosine-protein phosphatase S-like, transcript variant X4	2089	2110	162	-31.51	miRNA: 3' ucUG-GGUCUCCGUCUGGGUCu 5' :*||*::|||||||||||:||* target: 5' gtACATTAGAGGCAGACCTAGt 3'	2082	2102	-35.1	0.002375	target: 5' UACAUUAGAGGCAGACCUAGU 3' ****::|||||||||||:||* miRNA: 3' ----GGUCUCCGUCUGGGUCU 5'	no
lcr-miR-N82	rna-XM_019273422.2	gene-LOC104932418	LOC104932418	USP6 N-terminal-like protein, transcript variant X3	1181	1200	161	-23.79	miRNA: 3' ucUGGGUCUCCGUCUGGGUCu 5' :*||*|*|||*:||||||||* target: 5' gaACAC-GAGTTAGACCCAGt 3'	618	638	-30.6	0.009058	target: 5' CAGUAGAACACGAGUUAGACCCAGU 3' ||*********|||*:||||||||* miRNA: 3' GU---------CUCCGUCUGGGUCU 5'	no
lcr-miR-N82	rna-XM_019254938.2	gene-LOC104922022	LOC104922022	syntaxin-binding protein 5, transcript variant X4	1827	1850	165	-29.43	miRNA: 3' ucUGGGU--CUC-CGUCUGGGUCu 5' **||::|**|||*||||||||||: target: 5' taACTTATGGAGTGCAGACCCAGg 3'	1827	1847	-33.8	0.005033	target: 5' AUGGAGUGCAGACCCAGGG 3' **:|||*||||||||||:* miRNA: 3' --UCUC-CGUCUGGGUCU- 5'	no
lcr-miR-N82	rna-XM_019264020.2	gene-LOC104929428	LOC104929428	transcription factor Sox-1a, transcript variant X1	2513	2532	172	-35.09	miRNA: 3' ucuGGGUCUCCGUCUGGGUCu 5' |**|||:||*||||||||||| target: 5' accCCCGGA-GCAGACCCAGa 3'	2508	2528	-39.9	0.000713	target: 5' CCCGGA-GCAGACCCAGAA 3' |**:||*|||||||||||* miRNA: 3' G--UCUCCGUCUGGGUCU- 5'	no
lcr-miR-N82	rna-XM_019279125.2	gene-paqr6	paqr6	progestin and adipoQ receptor family member 6, transcript variant X2	198	221	162	-25.73	miRNA: 3' ucUGGGUCUCCG---UCUGGGUCu 5' **||:||||*||***:|||||||* target: 5' ttACTCAGAAGCTGAGGACCCAGt 3'	199	219	-30	0.00496	target: 5' AGAAGCUGAGGACCCAGU 3' |||*||***:|||||||* miRNA: 3' UCUCCG---UCUGGGUCU 5'	no
lcr-miR-N82	rna-XM_019273051.2	gene-LOC104938060	LOC104938060	disks large homolog 4, transcript variant X6	360	380	164	-28.89	miRNA: 3' ucuggGUCUCCGUCUGGGUCu 5' :****||||||**|||||||* target: 5' gacagCAGAGGGTGACCCAGc 3'	358	378	-38.3	6.6e-05	target: 5' GCAGAGGGUGACCCAGC 3' *||||||**|||||||* miRNA: 3' -GUCUCCGUCUGGGUCU 5'	no
lcr-miR-N82	rna-XM_027275826.1	gene-LOC104938294	LOC104938294	carbohydrate sulfotransferase 8-like, transcript variant X2	24	42	160	-30.28	miRNA: 3' ucUGGGUCUCCGUCUGGGUCu 5' ||||:|**|||::|||||||: target: 5' agACTC--AGGTGGACCCAGg 3'	43	63	-27.6	0.006988	target: 5' CAGGUAGACUCAGGUGGACCCAGGU 3' |||********|||::|||||||:* miRNA: 3' GUC--------UCCGUCUGGGUCU- 5'	no
lcr-miR-N82	rna-XM_027286651.1	gene-LOC104939032	LOC104939032	bcl-2/adenovirus E1B 19 kDa-interacting protein 2-like protein, transcript variant X1	28	48	162	-30.51	miRNA: 3' ucuggguCUCCGUCUGGGUCu 5' *******||*||||||||||: target: 5' tccaggtGAAGCAGACCCAGg 3'	24	44	-33.7	0.000155	target: 5' CAGGUGAAGCAGACCCAGGG 3' |||:****||||||||||:* miRNA: 3' GUCUC---CGUCUGGGUCU- 5'	no
lcr-miR-N82	rna-XM_019278717.2	gene-ogdh	ogdh	oxoglutarate dehydrogenase, transcript variant X2	405	425	163	-26.4	miRNA: 3' ucUGGGUCUCCGUCUGGGUCu 5' **::::*|*|||||||||||| target: 5' ctGTTTTGTGGCAGACCCAGa 3'	401	421	-33.8	0.001252	target: 5' UGUUUUGUGGCAGACCCAGAC 3' ******|*||||||||||||* miRNA: 3' U-----CUCCGUCUGGGUCU- 5'	no
lcr-miR-N82	rna-XM_027282735.1	gene-st7	st7	suppression of tumorigenicity 7, transcript variant X3	14	34	169	-30.72	miRNA: 3' ucugGGUCUCCGUCUGGGUCu 5' *|:*|||||**|||||||||: target: 5' cggaCCAGAATCAGACCCAGg 3'	14	34	-33.1	0.000203	target: 5' CAGAAUCAGACCCAGGA 3' ||||**|||||||||:* miRNA: 3' GUCUCCGUCUGGGUCU- 5'	no
lcr-miR-N82	rna-XM_027275827.1	gene-LOC104938294	LOC104938294	carbohydrate sulfotransferase 8-like, transcript variant X2	24	42	160	-30.28	miRNA: 3' ucUGGGUCUCCGUCUGGGUCu 5' ||||:|**|||::|||||||: target: 5' agACTC--AGGTGGACCCAGg 3'	43	63	-27.6	0.006988	target: 5' CAGGUAGACUCAGGUGGACCCAGGU 3' |||********|||::|||||||:* miRNA: 3' GUC--------UCCGUCUGGGUCU- 5'	no
lcr-miR-N82	rna-XM_027289037.1	gene-cep131	cep131	centrosomal protein 131, transcript variant X2	1908	1929	165	-36.32	miRNA: 3' ucuGGGUCU-CCGUCUGGGUCu 5' |**||||||*|||||||:|||: target: 5' aatCCCAGACGGCAGACTCAGg 3'	1909	1929	-37.5	0.000712	target: 5' AGACGGCAGACUCAGGC 3' |||*|||||||:|||:* miRNA: 3' UCU-CCGUCUGGGUCU- 5'	no
lcr-miR-N82	rna-XM_027291413.1	gene-erbb4	erbb4	erb-b2 receptor tyrosine kinase 4, transcript variant X1	3437	3458	162	-26.84	miRNA: 3' ucUGGGUCU-CCGUCUGGGUCu 5' **|*::|||**||||||||||: target: 5' taAATTAGACTGCAGACCCAGg 3'	3429	3449	-33.4	0.009827	target: 5' AAAUUAGACUGCAGACCCAGGC 3' *****|||**||||||||||:* miRNA: 3' -----UCUC-CGUCUGGGUCU- 5'	no
lcr-miR-N82	rna-XM_027275132.1	gene-meis2	meis2	Meis homeobox 2, transcript variant X2	2329	2349	163	-32.1	miRNA: 3' ucUGGGUCUCCGUCUGGGUCu 5' |||||||****|||||||||: target: 5' agACCCAATCCCAGACCCAGg 3'	2321	2341	-35.3	0.003167	target: 5' AGACCCAAUCCCAGACCCAGGC 3' |||********|||||||||:* miRNA: 3' UCUCC------GUCUGGGUCU- 5'	no
lcr-miR-N82	rna-XM_010730901.3	gene-LOC104919001	LOC104919001	sia-alpha-2,3-Gal-beta-1,4-GlcNAc-R:alpha 2,8-sialyltransferase	29	51	160	-31.33	miRNA: 3' ucuGGGUCUC-CGU-CUGGGUCu 5' :**:||||||**||*|||||||| target: 5' gacTCCAGAGACCATGACCCAGa 3'	27	47	-35.2	0.004105	target: 5' CCAGAGACCAUGACCCAGAU 3' ||||||**||*||||||||* miRNA: 3' GGUCUCC-GU-CUGGGUCU- 5'	no
lcr-miR-N82	rna-XM_027273946.1	gene-LOC104938060	LOC104938060	disks large homolog 4, transcript variant X6	360	380	164	-28.89	miRNA: 3' ucuggGUCUCCGUCUGGGUCu 5' :****||||||**|||||||* target: 5' gacagCAGAGGGTGACCCAGc 3'	358	378	-38.3	6.6e-05	target: 5' GCAGAGGGUGACCCAGC 3' *||||||**|||||||* miRNA: 3' -GUCUCCGUCUGGGUCU 5'	no
lcr-miR-N82	rna-XM_027281486.1	gene-LOC104935759	LOC104935759	death-associated protein kinase 3, transcript variant X2	257	277	174	-31.73	miRNA: 3' ucuGGGUCUCCGUCUGGGUCu 5' :**|||||**||||||||||* target: 5' gtcCCCAGCAGCAGACCCAGc 3'	255	275	-33.5	0.000209	target: 5' CCAGCAGCAGACCCAGC 3' ||||**||||||||||* miRNA: 3' GGUCUCCGUCUGGGUCU 5'	no
lcr-miR-N82	rna-XM_019276563.2	gene-dtx1	dtx1	deltex E3 ubiquitin ligase 1, transcript variant X3	2617	2637	171	-31.58	miRNA: 3' ucUGGGUCUCCGUCUGGGUCu 5' *|||||||:*|:*|||||||* target: 5' tgACCCAGGCGTCGACCCAGt 3'	2615	2635	-34.5	0.005313	target: 5' AGGCGUCGACCCAGU 3' ||:*|:*|||||||* miRNA: 3' UCUCCGUCUGGGUCU 5'	no
lcr-miR-N82	rna-XM_019259298.2	gene-LOC104932572	LOC104932572	beta-1,4 N-acetylgalactosaminyltransferase 1, transcript variant X2	2037	2057	169	-36.54	miRNA: 3' ucugGGUCUCCGUCUGGGUCu 5' ||:*:|*||||:||||||||| target: 5' aggaTCTGAGGTAGACCCAGa 3'	2035	2055	-39.2	0.000398	target: 5' U-GAGGUAGACCCAGAU 3' :*||||:|||||||||* miRNA: 3' GUCUCCGUCUGGGUCU- 5'	no
lcr-miR-N82	rna-XM_019257863.2	gene-sbf1	sbf1	SET binding factor 1, transcript variant X2	3548	3567	161	-27.71	miRNA: 3' ucUGGGUCUCCGUCUGGGUCu 5' **|:||||***|||||||||* target: 5' ccATCCAG-TTCAGACCCAGc 3'	5265	5285	-36.7	0.003093	target: 5' UGGAGCUCUGCAGAACCCAGAC 3' ::|||****||||*|||||||* miRNA: 3' GUCUC----CGUC-UGGGUCU- 5'	no
lcr-miR-N82	rna-XM_027273943.1	gene-LOC104938060	LOC104938060	disks large homolog 4, transcript variant X6	360	380	164	-28.89	miRNA: 3' ucuggGUCUCCGUCUGGGUCu 5' :****||||||**|||||||* target: 5' gacagCAGAGGGTGACCCAGc 3'	358	378	-38.3	6.6e-05	target: 5' GCAGAGGGUGACCCAGC 3' *||||||**|||||||* miRNA: 3' -GUCUCCGUCUGGGUCU 5'	no
lcr-miR-N82	rna-XM_010743096.3	gene-LOC104928754	LOC104928754	uncharacterized protein C11orf95 homolog, transcript variant X1	546	567	170	-37.4	miRNA: 3' ucUGGGU-CUCCGUCUGGGUCu 5' |||:|||*||||*:|||||||: target: 5' agATCCAGGAGGGGGACCCAGg 3'	545	565	-40	0.000248	target: 5' CAGGAGGGGGACCCAGGA 3' ||*||||*:|||||||:* miRNA: 3' GU-CUCCGUCUGGGUCU- 5'	no
lcr-miR-N82	rna-XM_010733637.3	gene-LOC104921177	LOC104921177	stonustoxin subunit alpha, transcript variant X2	286	306	162	-28.54	miRNA: 3' ucuGGGUCUCCGUCUGGGUCu 5' ***|||*|:*|*||||||||| target: 5' cttCCCTGGAGAAGACCCAGa 3'	289	309	-30.9	0.002422	target: 5' GGAGA-AGACCCAGAA 3' :|||**|||||||||* miRNA: 3' UCUCCGUCUGGGUCU- 5'	no
lcr-miR-N82	rna-XM_027285134.1	gene-LOC104929637	LOC104929637	receptor-type tyrosine-protein phosphatase S-like, transcript variant X4	2089	2110	162	-31.51	miRNA: 3' ucUG-GGUCUCCGUCUGGGUCu 5' :*||*::|||||||||||:||* target: 5' gtACATTAGAGGCAGACCTAGt 3'	2082	2102	-35.1	0.002375	target: 5' UACAUUAGAGGCAGACCUAGU 3' ****::|||||||||||:||* miRNA: 3' ----GGUCUCCGUCUGGGUCU 5'	no
lcr-miR-N82	rna-XM_019257866.2	gene-sbf1	sbf1	SET binding factor 1, transcript variant X2	3548	3567	161	-27.71	miRNA: 3' ucUGGGUCUCCGUCUGGGUCu 5' **|:||||***|||||||||* target: 5' ccATCCAG-TTCAGACCCAGc 3'	5265	5285	-36.7	0.003093	target: 5' UGGAGCUCUGCAGAACCCAGAC 3' ::|||****||||*|||||||* miRNA: 3' GUCUC----CGUC-UGGGUCU- 5'	no
lcr-miR-N82	rna-XM_027281488.1	gene-LOC104935759	LOC104935759	death-associated protein kinase 3, transcript variant X2	257	277	174	-31.73	miRNA: 3' ucuGGGUCUCCGUCUGGGUCu 5' :**|||||**||||||||||* target: 5' gtcCCCAGCAGCAGACCCAGc 3'	255	275	-33.5	0.00021	target: 5' CCAGCAGCAGACCCAGC 3' ||||**||||||||||* miRNA: 3' GGUCUCCGUCUGGGUCU 5'	no
lcr-miR-N82	rna-XM_027291416.1	gene-erbb4	erbb4	erb-b2 receptor tyrosine kinase 4, transcript variant X1	3437	3458	162	-26.84	miRNA: 3' ucUGGGUCU-CCGUCUGGGUCu 5' **|*::|||**||||||||||: target: 5' taAATTAGACTGCAGACCCAGg 3'	3429	3449	-33.4	0.009827	target: 5' AAAUUAGACUGCAGACCCAGGC 3' *****|||**||||||||||:* miRNA: 3' -----UCUC-CGUCUGGGUCU- 5'	no
lcr-miR-N82	rna-XM_027289039.1	gene-cep131	cep131	centrosomal protein 131, transcript variant X2	1908	1929	165	-36.32	miRNA: 3' ucuGGGUCU-CCGUCUGGGUCu 5' |**||||||*|||||||:|||: target: 5' aatCCCAGACGGCAGACTCAGg 3'	1909	1929	-37.5	0.000712	target: 5' AGACGGCAGACUCAGGC 3' |||*|||||||:|||:* miRNA: 3' UCU-CCGUCUGGGUCU- 5'	no
lcr-miR-N82	rna-XM_019279126.2	gene-paqr6	paqr6	progestin and adipoQ receptor family member 6, transcript variant X2	198	221	162	-25.73	miRNA: 3' ucUGGGUCUCCG---UCUGGGUCu 5' **||:||||*||***:|||||||* target: 5' ttACTCAGAAGCTGAGGACCCAGt 3'	199	219	-30	0.00496	target: 5' AGAAGCUGAGGACCCAGU 3' |||*||***:|||||||* miRNA: 3' UCUCCG---UCUGGGUCU 5'	no
lcr-miR-N82	rna-XM_027279732.1	gene-arhgef6	arhgef6	Rac/Cdc42 guanine nucleotide exchange factor 6, transcript variant X1	1682	1702	162	-27.67	miRNA: 3' ucuGGGUCUCCGUCUGGGUCu 5' :**|:|*|:|*:||||||||* target: 5' gacCTCTGGGTTAGACCCAGc 3'	1680	1700	-32.6	0.00653	target: 5' CUGGGUUAGACCCAGC 3' **:||*:||||||||* miRNA: 3' UCUCC-GUCUGGGUCU 5'	no
lcr-miR-N82	rna-XM_027282736.1	gene-st7	st7	suppression of tumorigenicity 7, transcript variant X3	14	34	169	-30.72	miRNA: 3' ucugGGUCUCCGUCUGGGUCu 5' *|:*|||||**|||||||||: target: 5' cggaCCAGAATCAGACCCAGg 3'	14	34	-33.1	0.000203	target: 5' CAGAAUCAGACCCAGGA 3' ||||**|||||||||:* miRNA: 3' GUCUCCGUCUGGGUCU- 5'	no
lcr-miR-N82	rna-XM_010735102.3	gene-tbc1d20	tbc1d20	TBC1 domain family member 20	1078	1098	163	-28.16	miRNA: 3' ucUGGGUCUCCGUCUGGGUCu 5' *|:|*|||*||*:|||||||* target: 5' tgGCACAGTGGGGGACCCAGt 3'	1077	1097	-32.2	0.003193	target: 5' AGUGGGGGACCCAGU 3' ||*||*:|||||||* miRNA: 3' UCUCCGUCUGGGUCU 5'	no
lcr-miR-N82	rna-XM_027275828.1	gene-LOC104938294	LOC104938294	carbohydrate sulfotransferase 8-like, transcript variant X2	24	42	160	-30.28	miRNA: 3' ucUGGGUCUCCGUCUGGGUCu 5' ||||:|**|||::|||||||: target: 5' agACTC--AGGTGGACCCAGg 3'	43	63	-27.6	0.006988	target: 5' CAGGUAGACUCAGGUGGACCCAGGU 3' |||********|||::|||||||:* miRNA: 3' GUC--------UCCGUCUGGGUCU- 5'	no
lcr-miR-N82	rna-XM_027278584.1	gene-LOC104920102	LOC104920102	tankyrase-1, transcript variant X3	582	603	162	-33.98	miRNA: 3' ucUGGGUCUCC-GUCUGGGUCu 5' |*||||*||||*||||:||||| target: 5' acACCCTGAGGCCAGATCCAGa 3'	583	603	-37.1	0.001737	target: 5' UGAGGCCAGAUCCAGAA 3' *||||*||||:|||||* miRNA: 3' UCUCC-GUCUGGGUCU- 5'	no
lcr-miR-N82	rna-XM_027285141.1	gene-LOC104929637	LOC104929637	receptor-type tyrosine-protein phosphatase S-like, transcript variant X4	2089	2110	162	-31.51	miRNA: 3' ucUG-GGUCUCCGUCUGGGUCu 5' :*||*::|||||||||||:||* target: 5' gtACATTAGAGGCAGACCTAGt 3'	2082	2102	-35.1	0.002375	target: 5' UACAUUAGAGGCAGACCUAGU 3' ****::|||||||||||:||* miRNA: 3' ----GGUCUCCGUCUGGGUCU 5'	no
lcr-miR-N82	rna-XM_027285139.1	gene-LOC104929637	LOC104929637	receptor-type tyrosine-protein phosphatase S-like, transcript variant X4	2089	2110	162	-31.51	miRNA: 3' ucUG-GGUCUCCGUCUGGGUCu 5' :*||*::|||||||||||:||* target: 5' gtACATTAGAGGCAGACCTAGt 3'	2082	2102	-35.1	0.002375	target: 5' UACAUUAGAGGCAGACCUAGU 3' ****::|||||||||||:||* miRNA: 3' ----GGUCUCCGUCUGGGUCU 5'	no
lcr-miR-N82	rna-XM_027286649.1	gene-LOC104939032	LOC104939032	bcl-2/adenovirus E1B 19 kDa-interacting protein 2-like protein, transcript variant X1	28	48	162	-30.51	miRNA: 3' ucuggguCUCCGUCUGGGUCu 5' *******||*||||||||||: target: 5' tccaggtGAAGCAGACCCAGg 3'	24	44	-33.7	0.000155	target: 5' CAGGUGAAGCAGACCCAGGG 3' |||:****||||||||||:* miRNA: 3' GUCUC---CGUCUGGGUCU- 5'	no
lcr-miR-N82	rna-XM_027282733.1	gene-st7	st7	suppression of tumorigenicity 7, transcript variant X3	14	34	169	-30.72	miRNA: 3' ucugGGUCUCCGUCUGGGUCu 5' *|:*|||||**|||||||||: target: 5' cggaCCAGAATCAGACCCAGg 3'	14	34	-33.1	0.000203	target: 5' CAGAAUCAGACCCAGGA 3' ||||**|||||||||:* miRNA: 3' GUCUCCGUCUGGGUCU- 5'	no
lcr-miR-N82	rna-XM_027282257.1	gene-slc9a6	slc9a6	solute carrier family 9 member A6	7	26	164	-30.68	miRNA: 3' ucuGGGUCUCCGUCUGGGUCu 5' ***:||||**||||||||||| target: 5' tctTCCAG-CGCAGACCCAGa 3'	549	569	-32.8	0.000612	target: 5' AGC-GCAGACCCAGAC 3' ||**|||||||||||* miRNA: 3' UCUCCGUCUGGGUCU- 5'	no
lcr-miR-N82	rna-XM_010732918.3	gene-sh3bgrl	sh3bgrl	SH3 domain binding glutamate rich protein like	44	64	171	-29.57	miRNA: 3' ucUGGGUCUCCGUCUGGGUCu 5' |*|||||||**::|||||||| target: 5' aaACCCAGACCTGGACCCAGa 3'	45	65	-33.4	0.0009	target: 5' AGACCUGGACCCAGAC 3' |||**::||||||||* miRNA: 3' UCUCCGUCUGGGUCU- 5'	no
lcr-miR-N82	rna-XM_027286696.1	gene-LOC113747301	LOC113747301	LIM domain transcription factor LMO4.1-like, transcript variant X2	211	231	171	-28.59	miRNA: 3' ucUGGGUCUCCGUCUGGGUCu 5' |*:||*:|||*|||||||||* target: 5' atGCCAGGAGCCAGACCCAGc 3'	208	228	-31.8	0.000181	target: 5' CCAGGAGCCAGACCCAGC 3' |||*|||*|||||||||* miRNA: 3' GGU-CUCCGUCUGGGUCU 5'	no
lcr-miR-N82	rna-XM_019277561.2	gene-agpat3	agpat3	1-acylglycerol-3-phosphate O-acyltransferase 3	113	135	160	-31.41	miRNA: 3' ucugGGUCUC--CGUCUGGGUCu 5' **:*||||:|**|*||||||||* target: 5' caggCCAGGGGAGGAGACCCAGc 3'	113	133	-34.3	0.003847	target: 5' AGGGGAGG-AGACCCAGC 3' ***:||||*||||||||* miRNA: 3' G--UCUCCGUCUGGGUCU 5'	no
lcr-miR-N82	rna-XM_010732259.3	gene-LOC104920104	LOC104920104	nodal homolog 2-A	47	67	163	-24.05	miRNA: 3' ucUGGGUCUCCGUCUGGGUCu 5' **||:*||**|:||||||||| target: 5' ccACTAAGCCGTAGACCCAGa 3'	58	78	-33.6	0.000281	target: 5' CAGAGGAGUCUCCAGCCACCGAGCUACUCAGAG 3' ||||||******|||**********||:||||* miRNA: 3' GUCUCC------GUC----------UGGGUCU- 5'	no
lcr-miR-N82	rna-XM_019267820.2	gene-fez1	fez1	fasciculation and elongation protein zeta 1	199	218	165	-29.33	miRNA: 3' ucUGGGUCUCCGUCUGGGUCu 5' |*:|:|||*|*|||||||||| target: 5' aaGCTCAG-GCCAGACCCAGa 3'	200	220	-32.5	0.001962	target: 5' AG-GCCAGACCCAGAA 3' ||*|*||||||||||* miRNA: 3' UCUCCGUCUGGGUCU- 5'	no
lcr-miR-N82	rna-XM_027273945.1	gene-LOC104938060	LOC104938060	disks large homolog 4, transcript variant X6	360	380	164	-28.89	miRNA: 3' ucuggGUCUCCGUCUGGGUCu 5' :****||||||**|||||||* target: 5' gacagCAGAGGGTGACCCAGc 3'	358	378	-38.3	6.6e-05	target: 5' GCAGAGGGUGACCCAGC 3' *||||||**|||||||* miRNA: 3' -GUCUCCGUCUGGGUCU 5'	no
lcr-miR-N82	rna-XM_019254261.2	gene-fam240a	fam240a	family with sequence similarity 240 member A	635	655	163	-26.58	miRNA: 3' ucUGGGUCUCCGUCUGGGUCu 5' **|*|::||*|*||||||||| target: 5' ccAACTGGAAGGAGACCCAGa 3'	626	646	-33.7	0.000484	target: 5' CGUCCAACUGGAAGG-AGACCCAGAA 3' |********:|*|||*|||||||||* miRNA: 3' G--------UC-UCCGUCUGGGUCU- 5'	no
lcr-miR-N82	rna-XM_027288666.1	gene-LOC104932572	LOC104932572	beta-1,4 N-acetylgalactosaminyltransferase 1, transcript variant X2	2037	2057	169	-36.54	miRNA: 3' ucugGGUCUCCGUCUGGGUCu 5' ||:*:|*||||:||||||||| target: 5' aggaTCTGAGGTAGACCCAGa 3'	2035	2055	-39.2	0.000398	target: 5' U-GAGGUAGACCCAGAU 3' :*||||:|||||||||* miRNA: 3' GUCUCCGUCUGGGUCU- 5'	no
lcr-miR-N82	rna-XM_010738277.3	gene-pak6	pak6	p21 (RAC1) activated kinase 6, transcript variant X2	115	135	167	-30.76	miRNA: 3' ucugggUCUCCGUCUGGGUCu 5' **:|**|||*||||||||||| target: 5' ctgcagAGAAGCAGACCCAGa 3'	108	128	-34.6	0.001022	target: 5' GCUGCAGAGAAGCAGACCCAGAC 3' ****|||||**|||||||||||* miRNA: 3' ----GUCUC--CGUCUGGGUCU- 5'	no
lcr-miR-N82	rna-XM_010731145.3	gene-klhl24	klhl24	kelch like family member 24	1852	1872	167	-29.8	miRNA: 3' ucUGGGUCUCCGUCUGGGUCu 5' |*|:||**||||*|||||||| target: 5' acATCCTCAGGCTGACCCAGa 3'	1852	1872	-32.5	0.006622	target: 5' UCAGGCUGACCCAGAG 3' **||||*||||||||* miRNA: 3' UCUCCGUCUGGGUCU- 5'	no
lcr-miR-N82	rna-XM_010736975.3	gene-LOC104923789	LOC104923789	protein CYR61	1188	1207	173	-35.16	miRNA: 3' ucUGGGUCUCCGUCUGGGUCu 5' |||||||||*|*||||||||| target: 5' agACCCAGAAG-AGACCCAGa 3'	1186	1206	-38.1	0.000216	target: 5' CAGAAG-AGACCCAGAC 3' ||||*|*|||||||||* miRNA: 3' GUCUCCGUCUGGGUCU- 5'	no
lcr-miR-N82	rna-XM_019261833.2	gene-LOC104921177	LOC104921177	stonustoxin subunit alpha, transcript variant X2	286	306	162	-28.54	miRNA: 3' ucuGGGUCUCCGUCUGGGUCu 5' ***|||*|:*|*||||||||| target: 5' cttCCCTGGAGAAGACCCAGa 3'	289	309	-30.9	0.002422	target: 5' GGAGA-AGACCCAGAA 3' :|||**|||||||||* miRNA: 3' UCUCCGUCUGGGUCU- 5'	no
lcr-miR-N82	rna-XM_027278256.1	gene-dtx1	dtx1	deltex E3 ubiquitin ligase 1, transcript variant X3	2617	2637	171	-31.58	miRNA: 3' ucUGGGUCUCCGUCUGGGUCu 5' *|||||||:*|:*|||||||* target: 5' tgACCCAGGCGTCGACCCAGt 3'	2615	2635	-34.5	0.005304	target: 5' AGGCGUCGACCCAGU 3' ||:*|:*|||||||* miRNA: 3' UCUCCGUCUGGGUCU 5'	no
lcr-miR-N82	rna-XM_010736923.3	gene-sbf1	sbf1	SET binding factor 1, transcript variant X2	3548	3567	161	-27.71	miRNA: 3' ucUGGGUCUCCGUCUGGGUCu 5' **|:||||***|||||||||* target: 5' ccATCCAG-TTCAGACCCAGc 3'	5265	5285	-36.7	0.003093	target: 5' UGGAGCUCUGCAGAACCCAGAC 3' ::|||****||||*|||||||* miRNA: 3' GUCUC----CGUC-UGGGUCU- 5'	no
lcr-miR-N82	rna-XM_027273740.1	gene-lrch2	lrch2	leucine rich repeats and calponin homology domain containing 2	1202	1222	171	-29.51	miRNA: 3' ucUGGGUCUCCGUCUGGGUCu 5' |||*|||||**|||||||||* target: 5' agAACCAGAACCAGACCCAGc 3'	1200	1220	-31.6	0.003948	target: 5' CCAACAUGGGCUAGGACCCAGC 3' |||****:|||**:|||||||* miRNA: 3' GGUC---UCCG--UCUGGGUCU 5'	no
lcr-miR-N82	rna-XM_027290679.1	gene-acvr1c	acvr1c	activin A receptor type 1C	149	170	165	-36.57	miRNA: 3' ucuGGGUCUC-CGUCUGGGUCu 5' |**|||||||*|||||:||||: target: 5' accCCCAGAGAGCAGATCCAGg 3'	151	171	-38.2	6.9e-05	target: 5' AGAGAGCAGAUCCAGGU 3' ||||*|||||:||||:* miRNA: 3' UCUC-CGUCUGGGUCU- 5'	no
lcr-miR-N82	rna-XM_019275841.2	gene-glce	glce	glucuronic acid epimerase	4261	4281	164	-30.76	miRNA: 3' ucUG-GGUCUCCGUCUGGGUCu 5' *|||*|||*|||*||||||||| target: 5' tgACACCACAGG-AGACCCAGa 3'	4257	4277	-33.7	0.009642	target: 5' CACAGG-AGACCCAGAG 3' ||*|||*|||||||||* miRNA: 3' GUCUCCGUCUGGGUCU- 5'	no
lcr-miR-N82	rna-XM_027291411.1	gene-erbb4	erbb4	erb-b2 receptor tyrosine kinase 4, transcript variant X1	3437	3458	162	-26.84	miRNA: 3' ucUGGGUCU-CCGUCUGGGUCu 5' **|*::|||**||||||||||: target: 5' taAATTAGACTGCAGACCCAGg 3'	3429	3449	-33.4	0.009827	target: 5' AAAUUAGACUGCAGACCCAGGC 3' *****|||**||||||||||:* miRNA: 3' -----UCUC-CGUCUGGGUCU- 5'	no
lcr-miR-N82	rna-XM_019274136.2	gene-LOC104939317	LOC104939317	follistatin-related protein 1, transcript variant X1	45	65	171	-29.51	miRNA: 3' ucUGGGUCUCCGUCUGGGUCu 5' |||*|||||**|||||||||* target: 5' agAACCAGAACCAGACCCAGc 3'	44	64	-31.6	2.2e-05	target: 5' CAGAACCAGACCCAGC 3' ||||**|||||||||* miRNA: 3' GUCUCCGUCUGGGUCU 5'	no
lcr-miR-N82	rna-XM_010755119.3	gene-LOC104938688	LOC104938688	protein SCO2 homolog, mitochondrial	42	63	162	-27.08	miRNA: 3' ucUGGGUC-UCCGUCUGGGUCu 5' *||*||||*|**|||||||||* target: 5' tgAACCAGAACTCAGACCCAGc 3'	1	21	-29	0.000926	target: 5' CAGCUGAACCAGAACUCAGACCCAGC 3' |||**|**********|||||||||* miRNA: 3' GUCUCC----------GUCUGGGUCU 5'	no
lcr-miR-N82	rna-XM_019264522.2	gene-LOC104921676	LOC104921676	keratin-associated protein 19-2-like	40	59	161	-27.43	miRNA: 3' ucUGGGUCUCCGUCUGGGUCu 5' **||||*||**:||||||||: target: 5' ccACCC-GAAATAGACCCAGg 3'	50	70	-33.9	0.001117	target: 5' CAGGCCCAAGCCCAGAC 3' |||:**||*:||||||* miRNA: 3' GUCUCCGUCUGGGUCU- 5'	no
lcr-miR-N82	rna-XM_010738049.3	gene-LOC104924638	LOC104924638	galectin-8	2423	2443	179	-42.86	miRNA: 3' ucUGGGUCUCCGUCUGGGUCu 5' ||||||*|:|||:|||||||| target: 5' agACCCTGGGGCGGACCCAGa 3'	2420	2440	-46.4	1.6e-05	target: 5' CUGGGGCGGACCCAGAA 3' |*|:|||:||||||||* miRNA: 3' GUCUCCGUCUGGGUCU- 5'	no
lcr-miR-N82	rna-XM_019254937.2	gene-LOC104922022	LOC104922022	syntaxin-binding protein 5, transcript variant X4	1827	1850	165	-29.43	miRNA: 3' ucUGGGU--CUC-CGUCUGGGUCu 5' **||::|**|||*||||||||||: target: 5' taACTTATGGAGTGCAGACCCAGg 3'	1827	1847	-33.8	0.005033	target: 5' AUGGAGUGCAGACCCAGGG 3' **:|||*||||||||||:* miRNA: 3' --UCUC-CGUCUGGGUCU- 5'	no
lcr-miR-N82	rna-XM_010747840.3	gene-LOC104932572	LOC104932572	beta-1,4 N-acetylgalactosaminyltransferase 1, transcript variant X2	2037	2057	169	-36.54	miRNA: 3' ucugGGUCUCCGUCUGGGUCu 5' ||:*:|*||||:||||||||| target: 5' aggaTCTGAGGTAGACCCAGa 3'	2035	2055	-39.2	0.000398	target: 5' U-GAGGUAGACCCAGAU 3' :*||||:|||||||||* miRNA: 3' GUCUCCGUCUGGGUCU- 5'	no
lcr-miR-N82	rna-XM_019263583.2	gene-LOC104935772	LOC104935772	RNA/RNP complex-1-interacting phosphatase	196	216	179	-36.01	miRNA: 3' ucUGGGUCUCCGUCUGGGUCu 5' |||||||||**|||||||||* target: 5' agACCCAGACCCAGACCCAGc 3'	163	183	-28.9	0.001064	target: 5' CAGACCCAGACCCAGC 3' ||||**|||||||||* miRNA: 3' GUCUCCGUCUGGGUCU 5'	no
lcr-miR-N82	rna-XM_027288665.1	gene-LOC104932572	LOC104932572	beta-1,4 N-acetylgalactosaminyltransferase 1, transcript variant X2	2037	2057	169	-36.54	miRNA: 3' ucugGGUCUCCGUCUGGGUCu 5' ||:*:|*||||:||||||||| target: 5' aggaTCTGAGGTAGACCCAGa 3'	2035	2055	-39.2	0.000398	target: 5' U-GAGGUAGACCCAGAU 3' :*||||:|||||||||* miRNA: 3' GUCUCCGUCUGGGUCU- 5'	no
lcr-miR-N82	rna-XM_027282734.1	gene-st7	st7	suppression of tumorigenicity 7, transcript variant X3	14	34	169	-30.72	miRNA: 3' ucugGGUCUCCGUCUGGGUCu 5' *|:*|||||**|||||||||: target: 5' cggaCCAGAATCAGACCCAGg 3'	14	34	-33.1	0.000203	target: 5' CAGAAUCAGACCCAGGA 3' ||||**|||||||||:* miRNA: 3' GUCUCCGUCUGGGUCU- 5'	no
lcr-miR-N82	rna-XM_019257864.2	gene-sbf1	sbf1	SET binding factor 1, transcript variant X2	3548	3567	161	-27.71	miRNA: 3' ucUGGGUCUCCGUCUGGGUCu 5' **|:||||***|||||||||* target: 5' ccATCCAG-TTCAGACCCAGc 3'	5265	5285	-36.7	0.003093	target: 5' UGGAGCUCUGCAGAACCCAGAC 3' ::|||****||||*|||||||* miRNA: 3' GUCUC----CGUC-UGGGUCU- 5'	no
lcr-miR-N82	rna-XM_027273948.1	gene-LOC104938060	LOC104938060	disks large homolog 4, transcript variant X6	360	380	164	-28.89	miRNA: 3' ucuggGUCUCCGUCUGGGUCu 5' :****||||||**|||||||* target: 5' gacagCAGAGGGTGACCCAGc 3'	358	378	-38.3	6.6e-05	target: 5' GCAGAGGGUGACCCAGC 3' *||||||**|||||||* miRNA: 3' -GUCUCCGUCUGGGUCU 5'	no
lcr-miR-N82	rna-XM_027290864.1	gene-LOC104932093	LOC104932093	DCN1-like protein 1, transcript variant X2	395	414	161	-28.85	miRNA: 3' ucUGGGUCUCCGUCUGGGUCu 5' **||**:||||*||||||||| target: 5' caACAGGGAGG-AGACCCAGa 3'	313	333	-28.4	0.008698	target: 5' GCAGAGGAAGUCGUGGCCCAGAU 3' *||||||*|*****|:||||||* miRNA: 3' -GUCUCCGU-----CUGGGUCU- 5'	no
lcr-miR-N82	rna-XM_027286695.1	gene-LOC113747301	LOC113747301	LIM domain transcription factor LMO4.1-like, transcript variant X2	211	231	171	-28.59	miRNA: 3' ucUGGGUCUCCGUCUGGGUCu 5' |*:||*:|||*|||||||||* target: 5' atGCCAGGAGCCAGACCCAGc 3'	208	228	-31.8	0.000181	target: 5' CCAGGAGCCAGACCCAGC 3' |||*|||*|||||||||* miRNA: 3' GGU-CUCCGUCUGGGUCU 5'	no
lcr-miR-N82	rna-XM_010739908.3	gene-pgap2	pgap2	post-GPI attachment to proteins 2	704	724	165	-31.65	miRNA: 3' ucugggucUCCGUCUGGGUCu 5' |*******||||||||||||| target: 5' actggatcAGGCAGACCCAGa 3'	706	726	-36	0.001917	target: 5' ---AGGCAGACCCAGAG 3' ***|||||||||||||* miRNA: 3' GUCUCCGUCUGGGUCU- 5'	no
lcr-miR-N82	rna-XM_027277898.1	gene-ptch1	ptch1	patched 1	1859	1880	162	-29.08	miRNA: 3' ucUGG-GUCUCCGUCUGGGUCu 5' **|||*|||***|||||||||| target: 5' caACCACAGTTCCAGACCCAGa 3'	162	182	-32.6	0.008177	target: 5' GGACUGGCACAGGCCAGCCCAGC 3' :||**||||*******:|||||* miRNA: 3' UCU--CCGUC------UGGGUCU 5'	no
lcr-miR-N82	rna-XM_010738411.3	gene-aif1l	aif1l	allograft inflammatory factor 1 like	496	519	160	-29.44	miRNA: 3' ucugGGUCUC---CGUCUGGGUCu 5' :|**||||||****|||||||||* target: 5' ggtgCCAGAGATTACAGACCCAGc 3'	495	515	-36.2	0.000574	target: 5' CAGAGAUUACAGACCCAGC 3' |||||****|||||||||* miRNA: 3' GUCUCC---GUCUGGGUCU 5'	no
lcr-miR-N83	rna-XM_027273941.1	gene-LOC104938060	LOC104938060	disks large homolog 4, transcript variant X6	360	380	164	-28.89	miRNA: 3' ucuggGUCUCCGUCUGGGUCu 5' :****||||||**|||||||* target: 5' gacagCAGAGGGTGACCCAGc 3'	358	378	-38.3	6.6e-05	target: 5' GCAGAGGGUGACCCAGC 3' *||||||**|||||||* miRNA: 3' -GUCUCCGUCUGGGUCU 5'	no
lcr-miR-N83	rna-XM_019257864.2	gene-sbf1	sbf1	SET binding factor 1, transcript variant X2	3548	3567	161	-27.71	miRNA: 3' ucUGGGUCUCCGUCUGGGUCu 5' **|:||||***|||||||||* target: 5' ccATCCAG-TTCAGACCCAGc 3'	5265	5285	-36.7	0.003093	target: 5' UGGAGCUCUGCAGAACCCAGAC 3' ::|||****||||*|||||||* miRNA: 3' GUCUC----CGUC-UGGGUCU- 5'	no
lcr-miR-N83	rna-XM_010736923.3	gene-sbf1	sbf1	SET binding factor 1, transcript variant X2	3548	3567	161	-27.71	miRNA: 3' ucUGGGUCUCCGUCUGGGUCu 5' **|:||||***|||||||||* target: 5' ccATCCAG-TTCAGACCCAGc 3'	5265	5285	-36.7	0.003093	target: 5' UGGAGCUCUGCAGAACCCAGAC 3' ::|||****||||*|||||||* miRNA: 3' GUCUC----CGUC-UGGGUCU- 5'	no
lcr-miR-N83	rna-XM_027273946.1	gene-LOC104938060	LOC104938060	disks large homolog 4, transcript variant X6	360	380	164	-28.89	miRNA: 3' ucuggGUCUCCGUCUGGGUCu 5' :****||||||**|||||||* target: 5' gacagCAGAGGGTGACCCAGc 3'	358	378	-38.3	6.6e-05	target: 5' GCAGAGGGUGACCCAGC 3' *||||||**|||||||* miRNA: 3' -GUCUCCGUCUGGGUCU 5'	no
lcr-miR-N83	rna-XM_010747840.3	gene-LOC104932572	LOC104932572	beta-1,4 N-acetylgalactosaminyltransferase 1, transcript variant X2	2037	2057	169	-36.54	miRNA: 3' ucugGGUCUCCGUCUGGGUCu 5' ||:*:|*||||:||||||||| target: 5' aggaTCTGAGGTAGACCCAGa 3'	2035	2055	-39.2	0.000398	target: 5' U-GAGGUAGACCCAGAU 3' :*||||:|||||||||* miRNA: 3' GUCUCCGUCUGGGUCU- 5'	no
lcr-miR-N83	rna-XM_027285140.1	gene-LOC104929637	LOC104929637	receptor-type tyrosine-protein phosphatase S-like, transcript variant X4	2089	2110	162	-31.51	miRNA: 3' ucUG-GGUCUCCGUCUGGGUCu 5' :*||*::|||||||||||:||* target: 5' gtACATTAGAGGCAGACCTAGt 3'	2082	2102	-35.1	0.002375	target: 5' UACAUUAGAGGCAGACCUAGU 3' ****::|||||||||||:||* miRNA: 3' ----GGUCUCCGUCUGGGUCU 5'	no
lcr-miR-N83	rna-XM_027285135.1	gene-LOC104929637	LOC104929637	receptor-type tyrosine-protein phosphatase S-like, transcript variant X4	2089	2110	162	-31.51	miRNA: 3' ucUG-GGUCUCCGUCUGGGUCu 5' :*||*::|||||||||||:||* target: 5' gtACATTAGAGGCAGACCTAGt 3'	2082	2102	-35.1	0.002375	target: 5' UACAUUAGAGGCAGACCUAGU 3' ****::|||||||||||:||* miRNA: 3' ----GGUCUCCGUCUGGGUCU 5'	no
lcr-miR-N83	rna-XM_027281549.1	gene-LOC104925842	LOC104925842	very-long-chain 3-oxoacyl-CoA reductase-B	32	51	162	-27.56	miRNA: 3' ucuggGUCUCCGUCUGGGUCu 5' :*|**||||||*:|||||||* target: 5' gcaaaCAGAGG-GGACCCAGc 3'	27	47	-31.7	0.003847	target: 5' CAAACAGAGG-GGACCCAGC 3' ****||||||*:|||||||* miRNA: 3' ----GUCUCCGUCUGGGUCU 5'	no
lcr-miR-N83	rna-XM_027273949.1	gene-LOC104938060	LOC104938060	disks large homolog 4, transcript variant X6	360	380	164	-28.89	miRNA: 3' ucuggGUCUCCGUCUGGGUCu 5' :****||||||**|||||||* target: 5' gacagCAGAGGGTGACCCAGc 3'	358	378	-38.3	6.6e-05	target: 5' GCAGAGGGUGACCCAGC 3' *||||||**|||||||* miRNA: 3' -GUCUCCGUCUGGGUCU 5'	no
lcr-miR-N83	rna-XM_027285145.1	gene-LOC104929637	LOC104929637	receptor-type tyrosine-protein phosphatase S-like, transcript variant X4	2089	2110	162	-31.51	miRNA: 3' ucUG-GGUCUCCGUCUGGGUCu 5' :*||*::|||||||||||:||* target: 5' gtACATTAGAGGCAGACCTAGt 3'	2082	2102	-35.1	0.002375	target: 5' UACAUUAGAGGCAGACCUAGU 3' ****::|||||||||||:||* miRNA: 3' ----GGUCUCCGUCUGGGUCU 5'	no
lcr-miR-N83	rna-XM_027275134.1	gene-meis2	meis2	Meis homeobox 2, transcript variant X2	2329	2349	163	-32.1	miRNA: 3' ucUGGGUCUCCGUCUGGGUCu 5' |||||||****|||||||||: target: 5' agACCCAATCCCAGACCCAGg 3'	2321	2341	-35.3	0.003167	target: 5' AGACCCAAUCCCAGACCCAGGC 3' |||********|||||||||:* miRNA: 3' UCUCC------GUCUGGGUCU- 5'	no
lcr-miR-N83	rna-XM_027290864.1	gene-LOC104932093	LOC104932093	DCN1-like protein 1, transcript variant X2	395	414	161	-28.85	miRNA: 3' ucUGGGUCUCCGUCUGGGUCu 5' **||**:||||*||||||||| target: 5' caACAGGGAGG-AGACCCAGa 3'	313	333	-28.4	0.008698	target: 5' GCAGAGGAAGUCGUGGCCCAGAU 3' *||||||*|*****|:||||||* miRNA: 3' -GUCUCCGU-----CUGGGUCU- 5'	no
lcr-miR-N83	rna-XM_027282732.1	gene-st7	st7	suppression of tumorigenicity 7, transcript variant X3	14	34	169	-30.72	miRNA: 3' ucugGGUCUCCGUCUGGGUCu 5' *|:*|||||**|||||||||: target: 5' cggaCCAGAATCAGACCCAGg 3'	14	34	-33.1	0.000203	target: 5' CAGAAUCAGACCCAGGA 3' ||||**|||||||||:* miRNA: 3' GUCUCCGUCUGGGUCU- 5'	no
lcr-miR-N83	rna-XM_027291411.1	gene-erbb4	erbb4	erb-b2 receptor tyrosine kinase 4, transcript variant X1	3437	3458	162	-26.84	miRNA: 3' ucUGGGUCU-CCGUCUGGGUCu 5' **|*::|||**||||||||||: target: 5' taAATTAGACTGCAGACCCAGg 3'	3429	3449	-33.4	0.009827	target: 5' AAAUUAGACUGCAGACCCAGGC 3' *****|||**||||||||||:* miRNA: 3' -----UCUC-CGUCUGGGUCU- 5'	no
lcr-miR-N83	rna-XM_027279732.1	gene-arhgef6	arhgef6	Rac/Cdc42 guanine nucleotide exchange factor 6, transcript variant X1	1682	1702	162	-27.67	miRNA: 3' ucuGGGUCUCCGUCUGGGUCu 5' :**|:|*|:|*:||||||||* target: 5' gacCTCTGGGTTAGACCCAGc 3'	1680	1700	-32.6	0.00653	target: 5' CUGGGUUAGACCCAGC 3' **:||*:||||||||* miRNA: 3' UCUCC-GUCUGGGUCU 5'	no
lcr-miR-N83	rna-XM_027273950.1	gene-LOC104938060	LOC104938060	disks large homolog 4, transcript variant X6	360	380	164	-28.89	miRNA: 3' ucuggGUCUCCGUCUGGGUCu 5' :****||||||**|||||||* target: 5' gacagCAGAGGGTGACCCAGc 3'	358	378	-38.3	6.6e-05	target: 5' GCAGAGGGUGACCCAGC 3' *||||||**|||||||* miRNA: 3' -GUCUCCGUCUGGGUCU 5'	no
lcr-miR-N83	rna-XM_027291414.1	gene-erbb4	erbb4	erb-b2 receptor tyrosine kinase 4, transcript variant X1	3437	3458	162	-26.84	miRNA: 3' ucUGGGUCU-CCGUCUGGGUCu 5' **|*::|||**||||||||||: target: 5' taAATTAGACTGCAGACCCAGg 3'	3429	3449	-33.4	0.009827	target: 5' AAAUUAGACUGCAGACCCAGGC 3' *****|||**||||||||||:* miRNA: 3' -----UCUC-CGUCUGGGUCU- 5'	no
lcr-miR-N83	rna-XM_019264020.2	gene-LOC104929428	LOC104929428	transcription factor Sox-1a, transcript variant X1	2513	2532	172	-35.09	miRNA: 3' ucuGGGUCUCCGUCUGGGUCu 5' |**|||:||*||||||||||| target: 5' accCCCGGA-GCAGACCCAGa 3'	2508	2528	-39.9	0.000713	target: 5' CCCGGA-GCAGACCCAGAA 3' |**:||*|||||||||||* miRNA: 3' G--UCUCCGUCUGGGUCU- 5'	no
lcr-miR-N83	rna-XM_027286695.1	gene-LOC113747301	LOC113747301	LIM domain transcription factor LMO4.1-like, transcript variant X2	211	231	171	-28.59	miRNA: 3' ucUGGGUCUCCGUCUGGGUCu 5' |*:||*:|||*|||||||||* target: 5' atGCCAGGAGCCAGACCCAGc 3'	208	228	-31.8	0.000181	target: 5' CCAGGAGCCAGACCCAGC 3' |||*|||*|||||||||* miRNA: 3' GGU-CUCCGUCUGGGUCU 5'	no
lcr-miR-N83	rna-XM_027281486.1	gene-LOC104935759	LOC104935759	death-associated protein kinase 3, transcript variant X2	257	277	174	-31.73	miRNA: 3' ucuGGGUCUCCGUCUGGGUCu 5' :**|||||**||||||||||* target: 5' gtcCCCAGCAGCAGACCCAGc 3'	255	275	-33.5	0.000209	target: 5' CCAGCAGCAGACCCAGC 3' ||||**||||||||||* miRNA: 3' GGUCUCCGUCUGGGUCU 5'	no
lcr-miR-N83	rna-XM_019254938.2	gene-LOC104922022	LOC104922022	syntaxin-binding protein 5, transcript variant X4	1827	1850	165	-29.43	miRNA: 3' ucUGGGU--CUC-CGUCUGGGUCu 5' **||::|**|||*||||||||||: target: 5' taACTTATGGAGTGCAGACCCAGg 3'	1827	1847	-33.8	0.005033	target: 5' AUGGAGUGCAGACCCAGGG 3' **:|||*||||||||||:* miRNA: 3' --UCUC-CGUCUGGGUCU- 5'	no
lcr-miR-N83	rna-XM_010754661.3	gene-LOC104938294	LOC104938294	carbohydrate sulfotransferase 8-like, transcript variant X2	24	42	160	-30.28	miRNA: 3' ucUGGGUCUCCGUCUGGGUCu 5' ||||:|**|||::|||||||: target: 5' agACTC--AGGTGGACCCAGg 3'	43	63	-27.6	0.006988	target: 5' CAGGUAGACUCAGGUGGACCCAGGU 3' |||********|||::|||||||:* miRNA: 3' GUC--------UCCGUCUGGGUCU- 5'	no
lcr-miR-N83	rna-XM_027282257.1	gene-slc9a6	slc9a6	solute carrier family 9 member A6	7	26	164	-30.68	miRNA: 3' ucuGGGUCUCCGUCUGGGUCu 5' ***:||||**||||||||||| target: 5' tctTCCAG-CGCAGACCCAGa 3'	549	569	-32.8	0.000612	target: 5' AGC-GCAGACCCAGAC 3' ||**|||||||||||* miRNA: 3' UCUCCGUCUGGGUCU- 5'	no
lcr-miR-N83	rna-XM_019279126.2	gene-paqr6	paqr6	progestin and adipoQ receptor family member 6, transcript variant X2	198	221	162	-25.73	miRNA: 3' ucUGGGUCUCCG---UCUGGGUCu 5' **||:||||*||***:|||||||* target: 5' ttACTCAGAAGCTGAGGACCCAGt 3'	199	219	-30	0.00496	target: 5' AGAAGCUGAGGACCCAGU 3' |||*||***:|||||||* miRNA: 3' UCUCCG---UCUGGGUCU 5'	no
lcr-miR-N83	rna-XM_019259299.2	gene-LOC104932572	LOC104932572	beta-1,4 N-acetylgalactosaminyltransferase 1, transcript variant X2	2037	2057	169	-36.54	miRNA: 3' ucugGGUCUCCGUCUGGGUCu 5' ||:*:|*||||:||||||||| target: 5' aggaTCTGAGGTAGACCCAGa 3'	2035	2055	-39.2	0.000398	target: 5' U-GAGGUAGACCCAGAU 3' :*||||:|||||||||* miRNA: 3' GUCUCCGUCUGGGUCU- 5'	no
lcr-miR-N83	rna-XM_027277898.1	gene-ptch1	ptch1	patched 1	1859	1880	162	-29.08	miRNA: 3' ucUGG-GUCUCCGUCUGGGUCu 5' **|||*|||***|||||||||| target: 5' caACCACAGTTCCAGACCCAGa 3'	162	182	-32.6	0.008177	target: 5' GGACUGGCACAGGCCAGCCCAGC 3' :||**||||*******:|||||* miRNA: 3' UCU--CCGUC------UGGGUCU 5'	no
lcr-miR-N83	rna-XM_027288666.1	gene-LOC104932572	LOC104932572	beta-1,4 N-acetylgalactosaminyltransferase 1, transcript variant X2	2037	2057	169	-36.54	miRNA: 3' ucugGGUCUCCGUCUGGGUCu 5' ||:*:|*||||:||||||||| target: 5' aggaTCTGAGGTAGACCCAGa 3'	2035	2055	-39.2	0.000398	target: 5' U-GAGGUAGACCCAGAU 3' :*||||:|||||||||* miRNA: 3' GUCUCCGUCUGGGUCU- 5'	no
lcr-miR-N83	rna-XM_027273943.1	gene-LOC104938060	LOC104938060	disks large homolog 4, transcript variant X6	360	380	164	-28.89	miRNA: 3' ucuggGUCUCCGUCUGGGUCu 5' :****||||||**|||||||* target: 5' gacagCAGAGGGTGACCCAGc 3'	358	378	-38.3	6.6e-05	target: 5' GCAGAGGGUGACCCAGC 3' *||||||**|||||||* miRNA: 3' -GUCUCCGUCUGGGUCU 5'	no
lcr-miR-N83	rna-XM_019254939.2	gene-LOC104922022	LOC104922022	syntaxin-binding protein 5, transcript variant X4	1827	1850	165	-29.43	miRNA: 3' ucUGGGU--CUC-CGUCUGGGUCu 5' **||::|**|||*||||||||||: target: 5' taACTTATGGAGTGCAGACCCAGg 3'	1827	1847	-33.8	0.005033	target: 5' AUGGAGUGCAGACCCAGGG 3' **:|||*||||||||||:* miRNA: 3' --UCUC-CGUCUGGGUCU- 5'	no
lcr-miR-N83	rna-XM_027278584.1	gene-LOC104920102	LOC104920102	tankyrase-1, transcript variant X3	582	603	162	-33.98	miRNA: 3' ucUGGGUCUCC-GUCUGGGUCu 5' |*||||*||||*||||:||||| target: 5' acACCCTGAGGCCAGATCCAGa 3'	583	603	-37.1	0.001737	target: 5' UGAGGCCAGAUCCAGAA 3' *||||*||||:|||||* miRNA: 3' UCUCC-GUCUGGGUCU- 5'	no
lcr-miR-N83	rna-XM_027286649.1	gene-LOC104939032	LOC104939032	bcl-2/adenovirus E1B 19 kDa-interacting protein 2-like protein, transcript variant X1	28	48	162	-30.51	miRNA: 3' ucuggguCUCCGUCUGGGUCu 5' *******||*||||||||||: target: 5' tccaggtGAAGCAGACCCAGg 3'	24	44	-33.7	0.000155	target: 5' CAGGUGAAGCAGACCCAGGG 3' |||:****||||||||||:* miRNA: 3' GUCUC---CGUCUGGGUCU- 5'	no
lcr-miR-N83	rna-XM_027282737.1	gene-st7	st7	suppression of tumorigenicity 7, transcript variant X3	14	34	169	-30.72	miRNA: 3' ucugGGUCUCCGUCUGGGUCu 5' *|:*|||||**|||||||||: target: 5' cggaCCAGAATCAGACCCAGg 3'	14	34	-33.1	0.000203	target: 5' CAGAAUCAGACCCAGGA 3' ||||**|||||||||:* miRNA: 3' GUCUCCGUCUGGGUCU- 5'	no
lcr-miR-N83	rna-XM_010739908.3	gene-pgap2	pgap2	post-GPI attachment to proteins 2	704	724	165	-31.65	miRNA: 3' ucugggucUCCGUCUGGGUCu 5' |*******||||||||||||| target: 5' actggatcAGGCAGACCCAGa 3'	706	726	-36	0.001917	target: 5' ---AGGCAGACCCAGAG 3' ***|||||||||||||* miRNA: 3' GUCUCCGUCUGGGUCU- 5'	no
lcr-miR-N83	rna-XM_019254862.2	gene-LOC104928063	LOC104928063	sodium channel subunit beta-1	869	889	171	-34.04	miRNA: 3' ucUGGGUCUCCGUCUGGGUCu 5' |||:||*|:||*||||||||| target: 5' agATCCCGGGGAAGACCCAGa 3'	868	888	-37	0.000662	target: 5' CCGGGGAAGACCCAGAA 3' |*|:||*|||||||||* miRNA: 3' GUCUCCGUCUGGGUCU- 5'	no
lcr-miR-N83	rna-XM_019273052.2	gene-LOC104938060	LOC104938060	disks large homolog 4, transcript variant X6	360	380	164	-28.89	miRNA: 3' ucuggGUCUCCGUCUGGGUCu 5' :****||||||**|||||||* target: 5' gacagCAGAGGGTGACCCAGc 3'	358	378	-38.3	6.6e-05	target: 5' GCAGAGGGUGACCCAGC 3' *||||||**|||||||* miRNA: 3' -GUCUCCGUCUGGGUCU 5'	no
lcr-miR-N83	rna-XM_027286650.1	gene-LOC104939032	LOC104939032	bcl-2/adenovirus E1B 19 kDa-interacting protein 2-like protein, transcript variant X1	28	48	162	-30.51	miRNA: 3' ucuggguCUCCGUCUGGGUCu 5' *******||*||||||||||: target: 5' tccaggtGAAGCAGACCCAGg 3'	24	44	-33.7	0.000155	target: 5' CAGGUGAAGCAGACCCAGGG 3' |||:****||||||||||:* miRNA: 3' GUCUC---CGUCUGGGUCU- 5'	no
lcr-miR-N83	rna-XM_010738277.3	gene-pak6	pak6	p21 (RAC1) activated kinase 6, transcript variant X2	115	135	167	-30.76	miRNA: 3' ucugggUCUCCGUCUGGGUCu 5' **:|**|||*||||||||||| target: 5' ctgcagAGAAGCAGACCCAGa 3'	108	128	-34.6	0.001022	target: 5' GCUGCAGAGAAGCAGACCCAGAC 3' ****|||||**|||||||||||* miRNA: 3' ----GUCUC--CGUCUGGGUCU- 5'	no
lcr-miR-N83	rna-XM_027285142.1	gene-LOC104929637	LOC104929637	receptor-type tyrosine-protein phosphatase S-like, transcript variant X4	2089	2110	162	-31.51	miRNA: 3' ucUG-GGUCUCCGUCUGGGUCu 5' :*||*::|||||||||||:||* target: 5' gtACATTAGAGGCAGACCTAGt 3'	2082	2102	-35.1	0.002375	target: 5' UACAUUAGAGGCAGACCUAGU 3' ****::|||||||||||:||* miRNA: 3' ----GGUCUCCGUCUGGGUCU 5'	no
lcr-miR-N83	rna-XM_027285137.1	gene-LOC104929637	LOC104929637	receptor-type tyrosine-protein phosphatase S-like, transcript variant X4	2089	2110	162	-31.51	miRNA: 3' ucUG-GGUCUCCGUCUGGGUCu 5' :*||*::|||||||||||:||* target: 5' gtACATTAGAGGCAGACCTAGt 3'	2082	2102	-35.1	0.002375	target: 5' UACAUUAGAGGCAGACCUAGU 3' ****::|||||||||||:||* miRNA: 3' ----GGUCUCCGUCUGGGUCU 5'	no
lcr-miR-N83	rna-XM_027273944.1	gene-LOC104938060	LOC104938060	disks large homolog 4, transcript variant X6	360	380	164	-28.89	miRNA: 3' ucuggGUCUCCGUCUGGGUCu 5' :****||||||**|||||||* target: 5' gacagCAGAGGGTGACCCAGc 3'	358	378	-38.3	6.6e-05	target: 5' GCAGAGGGUGACCCAGC 3' *||||||**|||||||* miRNA: 3' -GUCUCCGUCUGGGUCU 5'	no
lcr-miR-N83	rna-XM_019260110.2	gene-cnnm2	cnnm2	cyclin and CBS domain divalent metal cation transport mediator 2	9	28	165	-32.32	miRNA: 3' ucUGGGUCUCCGUCUGGGUCu 5' :*:|||:|*||*||||||||| target: 5' gaGCCCGGTGG-AGACCCAGa 3'	10	30	-36	0.00196	target: 5' GGUGG-AGACCCAGAC 3' :|*||*|||||||||* miRNA: 3' UCUCCGUCUGGGUCU- 5'	no
lcr-miR-N83	rna-XM_010743096.3	gene-LOC104928754	LOC104928754	uncharacterized protein C11orf95 homolog, transcript variant X1	546	567	170	-37.4	miRNA: 3' ucUGGGU-CUCCGUCUGGGUCu 5' |||:|||*||||*:|||||||: target: 5' agATCCAGGAGGGGGACCCAGg 3'	545	565	-40	0.000248	target: 5' CAGGAGGGGGACCCAGGA 3' ||*||||*:|||||||:* miRNA: 3' GU-CUCCGUCUGGGUCU- 5'	no
lcr-miR-N83	rna-XM_010735102.3	gene-tbc1d20	tbc1d20	TBC1 domain family member 20	1078	1098	163	-28.16	miRNA: 3' ucUGGGUCUCCGUCUGGGUCu 5' *|:|*|||*||*:|||||||* target: 5' tgGCACAGTGGGGGACCCAGt 3'	1077	1097	-32.2	0.003193	target: 5' AGUGGGGGACCCAGU 3' ||*||*:|||||||* miRNA: 3' UCUCCGUCUGGGUCU 5'	no
lcr-miR-N83	rna-XM_027281104.1	gene-LOC104932418	LOC104932418	USP6 N-terminal-like protein, transcript variant X3	1181	1200	161	-23.79	miRNA: 3' ucUGGGUCUCCGUCUGGGUCu 5' :*||*|*|||*:||||||||* target: 5' gaACAC-GAGTTAGACCCAGt 3'	618	638	-30.6	0.009058	target: 5' CAGUAGAACACGAGUUAGACCCAGU 3' ||*********|||*:||||||||* miRNA: 3' GU---------CUCCGUCUGGGUCU 5'	no
lcr-miR-N83	rna-XM_019274136.2	gene-LOC104939317	LOC104939317	follistatin-related protein 1, transcript variant X1	45	65	171	-29.51	miRNA: 3' ucUGGGUCUCCGUCUGGGUCu 5' |||*|||||**|||||||||* target: 5' agAACCAGAACCAGACCCAGc 3'	44	64	-31.6	2.2e-05	target: 5' CAGAACCAGACCCAGC 3' ||||**|||||||||* miRNA: 3' GUCUCCGUCUGGGUCU 5'	no
lcr-miR-N83	rna-XM_010738411.3	gene-aif1l	aif1l	allograft inflammatory factor 1 like	496	519	160	-29.44	miRNA: 3' ucugGGUCUC---CGUCUGGGUCu 5' :|**||||||****|||||||||* target: 5' ggtgCCAGAGATTACAGACCCAGc 3'	495	515	-36.2	0.000574	target: 5' CAGAGAUUACAGACCCAGC 3' |||||****|||||||||* miRNA: 3' GUCUCC---GUCUGGGUCU 5'	no
lcr-miR-N83	rna-XM_019264522.2	gene-LOC104921676	LOC104921676	keratin-associated protein 19-2-like	40	59	161	-27.43	miRNA: 3' ucUGGGUCUCCGUCUGGGUCu 5' **||||*||**:||||||||: target: 5' ccACCC-GAAATAGACCCAGg 3'	50	70	-33.9	0.001117	target: 5' CAGGCCCAAGCCCAGAC 3' |||:**||*:||||||* miRNA: 3' GUCUCCGUCUGGGUCU- 5'	no
lcr-miR-N83	rna-XM_027281488.1	gene-LOC104935759	LOC104935759	death-associated protein kinase 3, transcript variant X2	257	277	174	-31.73	miRNA: 3' ucuGGGUCUCCGUCUGGGUCu 5' :**|||||**||||||||||* target: 5' gtcCCCAGCAGCAGACCCAGc 3'	255	275	-33.5	0.00021	target: 5' CCAGCAGCAGACCCAGC 3' ||||**||||||||||* miRNA: 3' GGUCUCCGUCUGGGUCU 5'	no
lcr-miR-N83	rna-XM_010732259.3	gene-LOC104920104	LOC104920104	nodal homolog 2-A	47	67	163	-24.05	miRNA: 3' ucUGGGUCUCCGUCUGGGUCu 5' **||:*||**|:||||||||| target: 5' ccACTAAGCCGTAGACCCAGa 3'	58	78	-33.6	0.000281	target: 5' CAGAGGAGUCUCCAGCCACCGAGCUACUCAGAG 3' ||||||******|||**********||:||||* miRNA: 3' GUCUCC------GUC----------UGGGUCU- 5'	no
lcr-miR-N83	rna-XM_019261833.2	gene-LOC104921177	LOC104921177	stonustoxin subunit alpha, transcript variant X2	286	306	162	-28.54	miRNA: 3' ucuGGGUCUCCGUCUGGGUCu 5' ***|||*|:*|*||||||||| target: 5' cttCCCTGGAGAAGACCCAGa 3'	289	309	-30.9	0.002422	target: 5' GGAGA-AGACCCAGAA 3' :|||**|||||||||* miRNA: 3' UCUCCGUCUGGGUCU- 5'	no
lcr-miR-N83	rna-XM_019254937.2	gene-LOC104922022	LOC104922022	syntaxin-binding protein 5, transcript variant X4	1827	1850	165	-29.43	miRNA: 3' ucUGGGU--CUC-CGUCUGGGUCu 5' **||::|**|||*||||||||||: target: 5' taACTTATGGAGTGCAGACCCAGg 3'	1827	1847	-33.8	0.005033	target: 5' AUGGAGUGCAGACCCAGGG 3' **:|||*||||||||||:* miRNA: 3' --UCUC-CGUCUGGGUCU- 5'	no
lcr-miR-N83	rna-XM_027275214.1	gene-e2f2	e2f2	E2F transcription factor 2, transcript variant X2	804	824	161	-26.05	miRNA: 3' ucugGGUCUCCGUCUGGGUCu 5' ||**|::||**|||||||||| target: 5' agtaCTGGACCCAGACCCAGa 3'	796	816	-32.1	0.004918	target: 5' CCAGUACUGGACCCAGACCCAGAG 3' ||||****||***||||||||||* miRNA: 3' GGUCU---CC---GUCUGGGUCU- 5'	no
lcr-miR-N83	rna-XM_027282735.1	gene-st7	st7	suppression of tumorigenicity 7, transcript variant X3	14	34	169	-30.72	miRNA: 3' ucugGGUCUCCGUCUGGGUCu 5' *|:*|||||**|||||||||: target: 5' cggaCCAGAATCAGACCCAGg 3'	14	34	-33.1	0.000203	target: 5' CAGAAUCAGACCCAGGA 3' ||||**|||||||||:* miRNA: 3' GUCUCCGUCUGGGUCU- 5'	no
lcr-miR-N83	rna-XM_019267820.2	gene-fez1	fez1	fasciculation and elongation protein zeta 1	199	218	165	-29.33	miRNA: 3' ucUGGGUCUCCGUCUGGGUCu 5' |*:|:|||*|*|||||||||| target: 5' aaGCTCAG-GCCAGACCCAGa 3'	200	220	-32.5	0.001962	target: 5' AG-GCCAGACCCAGAA 3' ||*|*||||||||||* miRNA: 3' UCUCCGUCUGGGUCU- 5'	no
lcr-miR-N83	rna-XM_027275827.1	gene-LOC104938294	LOC104938294	carbohydrate sulfotransferase 8-like, transcript variant X2	24	42	160	-30.28	miRNA: 3' ucUGGGUCUCCGUCUGGGUCu 5' ||||:|**|||::|||||||: target: 5' agACTC--AGGTGGACCCAGg 3'	43	63	-27.6	0.006988	target: 5' CAGGUAGACUCAGGUGGACCCAGGU 3' |||********|||::|||||||:* miRNA: 3' GUC--------UCCGUCUGGGUCU- 5'	no
lcr-miR-N83	rna-XM_019276563.2	gene-dtx1	dtx1	deltex E3 ubiquitin ligase 1, transcript variant X3	2617	2637	171	-31.58	miRNA: 3' ucUGGGUCUCCGUCUGGGUCu 5' *|||||||:*|:*|||||||* target: 5' tgACCCAGGCGTCGACCCAGt 3'	2615	2635	-34.5	0.005313	target: 5' AGGCGUCGACCCAGU 3' ||:*|:*|||||||* miRNA: 3' UCUCCGUCUGGGUCU 5'	no
lcr-miR-N83	rna-XM_027274944.1	gene-traf3	traf3	TNF receptor associated factor 3	491	511	165	-31.7	miRNA: 3' ucugGGUCUCCGUCUGGGUCu 5' :*:*||||:**|||||||||: target: 5' gagaCCAGGTACAGACCCAGg 3'	489	509	-32.6	0.001838	target: 5' CCAGGUACAGACCCAGGA 3' ||||:**|||||||||:* miRNA: 3' GGUCUCCGUCUGGGUCU- 5'	no
lcr-miR-N83	rna-XM_027285139.1	gene-LOC104929637	LOC104929637	receptor-type tyrosine-protein phosphatase S-like, transcript variant X4	2089	2110	162	-31.51	miRNA: 3' ucUG-GGUCUCCGUCUGGGUCu 5' :*||*::|||||||||||:||* target: 5' gtACATTAGAGGCAGACCTAGt 3'	2082	2102	-35.1	0.002375	target: 5' UACAUUAGAGGCAGACCUAGU 3' ****::|||||||||||:||* miRNA: 3' ----GGUCUCCGUCUGGGUCU 5'	no
lcr-miR-N83	rna-XM_019275841.2	gene-glce	glce	glucuronic acid epimerase	4261	4281	164	-30.76	miRNA: 3' ucUG-GGUCUCCGUCUGGGUCu 5' *|||*|||*|||*||||||||| target: 5' tgACACCACAGG-AGACCCAGa 3'	4257	4277	-33.7	0.009642	target: 5' CACAGG-AGACCCAGAG 3' ||*|||*|||||||||* miRNA: 3' GUCUCCGUCUGGGUCU- 5'	no
lcr-miR-N83	rna-XM_027285134.1	gene-LOC104929637	LOC104929637	receptor-type tyrosine-protein phosphatase S-like, transcript variant X4	2089	2110	162	-31.51	miRNA: 3' ucUG-GGUCUCCGUCUGGGUCu 5' :*||*::|||||||||||:||* target: 5' gtACATTAGAGGCAGACCTAGt 3'	2082	2102	-35.1	0.002375	target: 5' UACAUUAGAGGCAGACCUAGU 3' ****::|||||||||||:||* miRNA: 3' ----GGUCUCCGUCUGGGUCU 5'	no
lcr-miR-N83	rna-XM_027273948.1	gene-LOC104938060	LOC104938060	disks large homolog 4, transcript variant X6	360	380	164	-28.89	miRNA: 3' ucuggGUCUCCGUCUGGGUCu 5' :****||||||**|||||||* target: 5' gacagCAGAGGGTGACCCAGc 3'	358	378	-38.3	6.6e-05	target: 5' GCAGAGGGUGACCCAGC 3' *||||||**|||||||* miRNA: 3' -GUCUCCGUCUGGGUCU 5'	no
lcr-miR-N83	rna-XM_010747888.3	gene-etfb	etfb	electron transfer flavoprotein subunit beta	595	615	163	-27.9	miRNA: 3' ucUGGGUCUCCGUCUGGGUCu 5' **::||*|**||||||||||| target: 5' ctGTCCTGCAGCAGACCCAGa 3'	580	600	-31.7	0.003019	target: 5' U-GAGAAACACUGUCCUGCAGCAGACCCAGAC 3' :*|||***************|||||||||||* miRNA: 3' GUCUC---------------CGUCUGGGUCU- 5'	no
lcr-miR-N83	rna-XM_027275135.1	gene-meis2	meis2	Meis homeobox 2, transcript variant X2	2329	2349	163	-32.1	miRNA: 3' ucUGGGUCUCCGUCUGGGUCu 5' |||||||****|||||||||: target: 5' agACCCAATCCCAGACCCAGg 3'	2321	2341	-35.3	0.003167	target: 5' AGACCCAAUCCCAGACCCAGGC 3' |||********|||||||||:* miRNA: 3' UCUCC------GUCUGGGUCU- 5'	no
lcr-miR-N83	rna-XM_019273501.2	gene-LOC104928754	LOC104928754	uncharacterized protein C11orf95 homolog, transcript variant X1	546	567	170	-37.4	miRNA: 3' ucUGGGU-CUCCGUCUGGGUCu 5' |||:|||*||||*:|||||||: target: 5' agATCCAGGAGGGGGACCCAGg 3'	545	565	-40	0.000248	target: 5' CAGGAGGGGGACCCAGGA 3' ||*||||*:|||||||:* miRNA: 3' GU-CUCCGUCUGGGUCU- 5'	no
lcr-miR-N83	rna-XM_019257865.2	gene-sbf1	sbf1	SET binding factor 1, transcript variant X2	3548	3567	161	-27.71	miRNA: 3' ucUGGGUCUCCGUCUGGGUCu 5' **|:||||***|||||||||* target: 5' ccATCCAG-TTCAGACCCAGc 3'	5265	5285	-36.7	0.003093	target: 5' UGGAGCUCUGCAGAACCCAGAC 3' ::|||****||||*|||||||* miRNA: 3' GUCUC----CGUC-UGGGUCU- 5'	no
lcr-miR-N83	rna-XM_019277561.2	gene-agpat3	agpat3	1-acylglycerol-3-phosphate O-acyltransferase 3	113	135	160	-31.41	miRNA: 3' ucugGGUCUC--CGUCUGGGUCu 5' **:*||||:|**|*||||||||* target: 5' caggCCAGGGGAGGAGACCCAGc 3'	113	133	-34.3	0.003847	target: 5' AGGGGAGG-AGACCCAGC 3' ***:||||*||||||||* miRNA: 3' G--UCUCCGUCUGGGUCU 5'	no
lcr-miR-N83	rna-XM_027286652.1	gene-LOC104939032	LOC104939032	bcl-2/adenovirus E1B 19 kDa-interacting protein 2-like protein, transcript variant X1	28	48	162	-30.51	miRNA: 3' ucuggguCUCCGUCUGGGUCu 5' *******||*||||||||||: target: 5' tccaggtGAAGCAGACCCAGg 3'	24	44	-33.7	0.000155	target: 5' CAGGUGAAGCAGACCCAGGG 3' |||:****||||||||||:* miRNA: 3' GUCUC---CGUCUGGGUCU- 5'	no
lcr-miR-N83	rna-XM_027275826.1	gene-LOC104938294	LOC104938294	carbohydrate sulfotransferase 8-like, transcript variant X2	24	42	160	-30.28	miRNA: 3' ucUGGGUCUCCGUCUGGGUCu 5' ||||:|**|||::|||||||: target: 5' agACTC--AGGTGGACCCAGg 3'	43	63	-27.6	0.006988	target: 5' CAGGUAGACUCAGGUGGACCCAGGU 3' |||********|||::|||||||:* miRNA: 3' GUC--------UCCGUCUGGGUCU- 5'	no
lcr-miR-N83	rna-XM_027289038.1	gene-cep131	cep131	centrosomal protein 131, transcript variant X2	1908	1929	165	-36.32	miRNA: 3' ucuGGGUCU-CCGUCUGGGUCu 5' |**||||||*|||||||:|||: target: 5' aatCCCAGACGGCAGACTCAGg 3'	1909	1929	-37.5	0.000712	target: 5' AGACGGCAGACUCAGGC 3' |||*|||||||:|||:* miRNA: 3' UCU-CCGUCUGGGUCU- 5'	no
lcr-miR-N83	rna-XM_027282736.1	gene-st7	st7	suppression of tumorigenicity 7, transcript variant X3	14	34	169	-30.72	miRNA: 3' ucugGGUCUCCGUCUGGGUCu 5' *|:*|||||**|||||||||: target: 5' cggaCCAGAATCAGACCCAGg 3'	14	34	-33.1	0.000203	target: 5' CAGAAUCAGACCCAGGA 3' ||||**|||||||||:* miRNA: 3' GUCUCCGUCUGGGUCU- 5'	no
lcr-miR-N83	rna-XM_010736922.3	gene-sbf1	sbf1	SET binding factor 1, transcript variant X2	3548	3567	161	-27.71	miRNA: 3' ucUGGGUCUCCGUCUGGGUCu 5' **|:||||***|||||||||* target: 5' ccATCCAG-TTCAGACCCAGc 3'	5265	5285	-36.7	0.003093	target: 5' UGGAGCUCUGCAGAACCCAGAC 3' ::|||****||||*|||||||* miRNA: 3' GUCUC----CGUC-UGGGUCU- 5'	no
lcr-miR-N83	rna-XM_027273947.1	gene-LOC104938060	LOC104938060	disks large homolog 4, transcript variant X6	360	380	164	-28.89	miRNA: 3' ucuggGUCUCCGUCUGGGUCu 5' :****||||||**|||||||* target: 5' gacagCAGAGGGTGACCCAGc 3'	358	378	-38.3	6.6e-05	target: 5' GCAGAGGGUGACCCAGC 3' *||||||**|||||||* miRNA: 3' -GUCUCCGUCUGGGUCU 5'	no
lcr-miR-N83	rna-XM_010732918.3	gene-sh3bgrl	sh3bgrl	SH3 domain binding glutamate rich protein like	44	64	171	-29.57	miRNA: 3' ucUGGGUCUCCGUCUGGGUCu 5' |*|||||||**::|||||||| target: 5' aaACCCAGACCTGGACCCAGa 3'	45	65	-33.4	0.0009	target: 5' AGACCUGGACCCAGAC 3' |||**::||||||||* miRNA: 3' UCUCCGUCUGGGUCU- 5'	no
lcr-miR-N83	rna-XM_027291410.1	gene-erbb4	erbb4	erb-b2 receptor tyrosine kinase 4, transcript variant X1	3437	3458	162	-26.84	miRNA: 3' ucUGGGUCU-CCGUCUGGGUCu 5' **|*::|||**||||||||||: target: 5' taAATTAGACTGCAGACCCAGg 3'	3429	3449	-33.4	0.009827	target: 5' AAAUUAGACUGCAGACCCAGGC 3' *****|||**||||||||||:* miRNA: 3' -----UCUC-CGUCUGGGUCU- 5'	no
lcr-miR-N83	rna-XM_010755503.3	gene-LOC104939027	LOC104939027	RNA-binding protein 38	67	87	162	-29.11	miRNA: 3' ucuGGGUCUCCGUCUGGGUCu 5' *|*||||*:||**|||||||* target: 5' tgcCCCACGGGGTGACCCAGc 3'	67	87	-33.6	0.001998	target: 5' ACGGGGUGACCCAGC 3' |*:||**|||||||* miRNA: 3' UCUCCGUCUGGGUCU 5'	no
lcr-miR-N83	rna-XM_027279736.1	gene-arhgef6	arhgef6	Rac/Cdc42 guanine nucleotide exchange factor 6, transcript variant X1	1682	1702	162	-27.67	miRNA: 3' ucuGGGUCUCCGUCUGGGUCu 5' :**|:|*|:|*:||||||||* target: 5' gacCTCTGGGTTAGACCCAGc 3'	1680	1700	-32.6	0.00653	target: 5' CUGGGUUAGACCCAGC 3' **:||*:||||||||* miRNA: 3' UCUCC-GUCUGGGUCU 5'	no
lcr-miR-N83	rna-XM_019273422.2	gene-LOC104932418	LOC104932418	USP6 N-terminal-like protein, transcript variant X3	1181	1200	161	-23.79	miRNA: 3' ucUGGGUCUCCGUCUGGGUCu 5' :*||*|*|||*:||||||||* target: 5' gaACAC-GAGTTAGACCCAGt 3'	618	638	-30.6	0.009058	target: 5' CAGUAGAACACGAGUUAGACCCAGU 3' ||*********|||*:||||||||* miRNA: 3' GU---------CUCCGUCUGGGUCU 5'	no
lcr-miR-N83	rna-XM_019254936.2	gene-LOC104922022	LOC104922022	syntaxin-binding protein 5, transcript variant X4	1827	1850	165	-29.43	miRNA: 3' ucUGGGU--CUC-CGUCUGGGUCu 5' **||::|**|||*||||||||||: target: 5' taACTTATGGAGTGCAGACCCAGg 3'	1827	1847	-33.8	0.005033	target: 5' AUGGAGUGCAGACCCAGGG 3' **:|||*||||||||||:* miRNA: 3' --UCUC-CGUCUGGGUCU- 5'	no
lcr-miR-N83	rna-XM_019276557.2	gene-dtx1	dtx1	deltex E3 ubiquitin ligase 1, transcript variant X3	2617	2637	171	-31.58	miRNA: 3' ucUGGGUCUCCGUCUGGGUCu 5' *|||||||:*|:*|||||||* target: 5' tgACCCAGGCGTCGACCCAGt 3'	2615	2635	-34.5	0.005313	target: 5' AGGCGUCGACCCAGU 3' ||:*|:*|||||||* miRNA: 3' UCUCCGUCUGGGUCU 5'	no
lcr-miR-N83	rna-XM_019259298.2	gene-LOC104932572	LOC104932572	beta-1,4 N-acetylgalactosaminyltransferase 1, transcript variant X2	2037	2057	169	-36.54	miRNA: 3' ucugGGUCUCCGUCUGGGUCu 5' ||:*:|*||||:||||||||| target: 5' aggaTCTGAGGTAGACCCAGa 3'	2035	2055	-39.2	0.000398	target: 5' U-GAGGUAGACCCAGAU 3' :*||||:|||||||||* miRNA: 3' GUCUCCGUCUGGGUCU- 5'	no
lcr-miR-N83	rna-XM_027290439.1	gene-acbd6	acbd6	acyl-CoA binding domain containing 6, transcript variant X2	80	101	170	-33.16	miRNA: 3' ucUGGGUCUC-CGUCUGGGUCu 5' **:|:|||||*|*||||||||| target: 5' ctGCTCAGAGAGGAGACCCAGa 3'	127	147	-32.4	0.000161	target: 5' AGAGAGGAGACCCAGAU 3' ||||*|*|||||||||* miRNA: 3' UCUC-CGUCUGGGUCU- 5'	no
lcr-miR-N83	rna-XM_027273538.1	gene-LOC104939317	LOC104939317	follistatin-related protein 1, transcript variant X1	45	65	171	-29.51	miRNA: 3' ucUGGGUCUCCGUCUGGGUCu 5' |||*|||||**|||||||||* target: 5' agAACCAGAACCAGACCCAGc 3'	44	64	-31.6	2.2e-05	target: 5' CAGAACCAGACCCAGC 3' ||||**|||||||||* miRNA: 3' GUCUCCGUCUGGGUCU 5'	no
lcr-miR-N83	rna-XM_027291409.1	gene-erbb4	erbb4	erb-b2 receptor tyrosine kinase 4, transcript variant X1	3437	3458	162	-26.84	miRNA: 3' ucUGGGUCU-CCGUCUGGGUCu 5' **|*::|||**||||||||||: target: 5' taAATTAGACTGCAGACCCAGg 3'	3429	3449	-33.4	0.009827	target: 5' AAAUUAGACUGCAGACCCAGGC 3' *****|||**||||||||||:* miRNA: 3' -----UCUC-CGUCUGGGUCU- 5'	no
lcr-miR-N83	rna-XM_027273942.1	gene-LOC104938060	LOC104938060	disks large homolog 4, transcript variant X6	360	380	164	-28.89	miRNA: 3' ucuggGUCUCCGUCUGGGUCu 5' :****||||||**|||||||* target: 5' gacagCAGAGGGTGACCCAGc 3'	358	378	-38.3	6.6e-05	target: 5' GCAGAGGGUGACCCAGC 3' *||||||**|||||||* miRNA: 3' -GUCUCCGUCUGGGUCU 5'	no
lcr-miR-N83	rna-XM_010736975.3	gene-LOC104923789	LOC104923789	protein CYR61	1188	1207	173	-35.16	miRNA: 3' ucUGGGUCUCCGUCUGGGUCu 5' |||||||||*|*||||||||| target: 5' agACCCAGAAG-AGACCCAGa 3'	1186	1206	-38.1	0.000216	target: 5' CAGAAG-AGACCCAGAC 3' ||||*|*|||||||||* miRNA: 3' GUCUCCGUCUGGGUCU- 5'	no
lcr-miR-N83	rna-XM_019279125.2	gene-paqr6	paqr6	progestin and adipoQ receptor family member 6, transcript variant X2	198	221	162	-25.73	miRNA: 3' ucUGGGUCUCCG---UCUGGGUCu 5' **||:||||*||***:|||||||* target: 5' ttACTCAGAAGCTGAGGACCCAGt 3'	199	219	-30	0.00496	target: 5' AGAAGCUGAGGACCCAGU 3' |||*||***:|||||||* miRNA: 3' UCUCCG---UCUGGGUCU 5'	no
lcr-miR-N83	rna-XM_027282733.1	gene-st7	st7	suppression of tumorigenicity 7, transcript variant X3	14	34	169	-30.72	miRNA: 3' ucugGGUCUCCGUCUGGGUCu 5' *|:*|||||**|||||||||: target: 5' cggaCCAGAATCAGACCCAGg 3'	14	34	-33.1	0.000203	target: 5' CAGAAUCAGACCCAGGA 3' ||||**|||||||||:* miRNA: 3' GUCUCCGUCUGGGUCU- 5'	no
lcr-miR-N83	rna-XM_027291415.1	gene-erbb4	erbb4	erb-b2 receptor tyrosine kinase 4, transcript variant X1	3437	3458	162	-26.84	miRNA: 3' ucUGGGUCU-CCGUCUGGGUCu 5' **|*::|||**||||||||||: target: 5' taAATTAGACTGCAGACCCAGg 3'	3429	3449	-33.4	0.009827	target: 5' AAAUUAGACUGCAGACCCAGGC 3' *****|||**||||||||||:* miRNA: 3' -----UCUC-CGUCUGGGUCU- 5'	no
lcr-miR-N83	rna-XM_019273051.2	gene-LOC104938060	LOC104938060	disks large homolog 4, transcript variant X6	360	380	164	-28.89	miRNA: 3' ucuggGUCUCCGUCUGGGUCu 5' :****||||||**|||||||* target: 5' gacagCAGAGGGTGACCCAGc 3'	358	378	-38.3	6.6e-05	target: 5' GCAGAGGGUGACCCAGC 3' *||||||**|||||||* miRNA: 3' -GUCUCCGUCUGGGUCU 5'	no
lcr-miR-N83	rna-XM_027275828.1	gene-LOC104938294	LOC104938294	carbohydrate sulfotransferase 8-like, transcript variant X2	24	42	160	-30.28	miRNA: 3' ucUGGGUCUCCGUCUGGGUCu 5' ||||:|**|||::|||||||: target: 5' agACTC--AGGTGGACCCAGg 3'	43	63	-27.6	0.006988	target: 5' CAGGUAGACUCAGGUGGACCCAGGU 3' |||********|||::|||||||:* miRNA: 3' GUC--------UCCGUCUGGGUCU- 5'	no
lcr-miR-N83	rna-XM_027282100.1	gene-ogdh	ogdh	oxoglutarate dehydrogenase, transcript variant X2	405	425	163	-26.4	miRNA: 3' ucUGGGUCUCCGUCUGGGUCu 5' **::::*|*|||||||||||| target: 5' ctGTTTTGTGGCAGACCCAGa 3'	401	421	-33.8	0.001252	target: 5' UGUUUUGUGGCAGACCCAGAC 3' ******|*||||||||||||* miRNA: 3' U-----CUCCGUCUGGGUCU- 5'	no
lcr-miR-N83	rna-XM_019257866.2	gene-sbf1	sbf1	SET binding factor 1, transcript variant X2	3548	3567	161	-27.71	miRNA: 3' ucUGGGUCUCCGUCUGGGUCu 5' **|:||||***|||||||||* target: 5' ccATCCAG-TTCAGACCCAGc 3'	5265	5285	-36.7	0.003093	target: 5' UGGAGCUCUGCAGAACCCAGAC 3' ::|||****||||*|||||||* miRNA: 3' GUCUC----CGUC-UGGGUCU- 5'	no
lcr-miR-N83	rna-XM_010755119.3	gene-LOC104938688	LOC104938688	protein SCO2 homolog, mitochondrial	42	63	162	-27.08	miRNA: 3' ucUGGGUC-UCCGUCUGGGUCu 5' *||*||||*|**|||||||||* target: 5' tgAACCAGAACTCAGACCCAGc 3'	1	21	-29	0.000926	target: 5' CAGCUGAACCAGAACUCAGACCCAGC 3' |||**|**********|||||||||* miRNA: 3' GUCUCC----------GUCUGGGUCU 5'	no
lcr-miR-N83	rna-XM_027285136.1	gene-LOC104929637	LOC104929637	receptor-type tyrosine-protein phosphatase S-like, transcript variant X4	2089	2110	162	-31.51	miRNA: 3' ucUG-GGUCUCCGUCUGGGUCu 5' :*||*::|||||||||||:||* target: 5' gtACATTAGAGGCAGACCTAGt 3'	2082	2102	-35.1	0.002375	target: 5' UACAUUAGAGGCAGACCUAGU 3' ****::|||||||||||:||* miRNA: 3' ----GGUCUCCGUCUGGGUCU 5'	no
lcr-miR-N83	rna-XM_010738049.3	gene-LOC104924638	LOC104924638	galectin-8	2423	2443	179	-42.86	miRNA: 3' ucUGGGUCUCCGUCUGGGUCu 5' ||||||*|:|||:|||||||| target: 5' agACCCTGGGGCGGACCCAGa 3'	2420	2440	-46.4	1.6e-05	target: 5' CUGGGGCGGACCCAGAA 3' |*|:|||:||||||||* miRNA: 3' GUCUCCGUCUGGGUCU- 5'	no
lcr-miR-N83	rna-XM_010730829.3	gene-nop16	nop16	NOP16 nucleolar protein	66	86	164	-31.21	miRNA: 3' ucuggGUCUCCGUCUGGGUCu 5' **|**||**|||||||||||: target: 5' caagaCATTGGCAGACCCAGg 3'	50	70	-37	1.6e-05	target: 5' GUGACAGAAGCAAGACAUUGGCAGACCCAGGA 3' **||***************|||||||||||:* miRNA: 3' GUCU---------------CCGUCUGGGUCU- 5'	no
lcr-miR-N83	rna-XM_027289037.1	gene-cep131	cep131	centrosomal protein 131, transcript variant X2	1908	1929	165	-36.32	miRNA: 3' ucuGGGUCU-CCGUCUGGGUCu 5' |**||||||*|||||||:|||: target: 5' aatCCCAGACGGCAGACTCAGg 3'	1909	1929	-37.5	0.000712	target: 5' AGACGGCAGACUCAGGC 3' |||*|||||||:|||:* miRNA: 3' UCU-CCGUCUGGGUCU- 5'	no
lcr-miR-N83	rna-XM_010731145.3	gene-klhl24	klhl24	kelch like family member 24	1852	1872	167	-29.8	miRNA: 3' ucUGGGUCUCCGUCUGGGUCu 5' |*|:||**||||*|||||||| target: 5' acATCCTCAGGCTGACCCAGa 3'	1852	1872	-32.5	0.006622	target: 5' UCAGGCUGACCCAGAG 3' **||||*||||||||* miRNA: 3' UCUCCGUCUGGGUCU- 5'	no
lcr-miR-N83	rna-XM_019264019.2	gene-LOC104929428	LOC104929428	transcription factor Sox-1a, transcript variant X1	2513	2532	172	-35.09	miRNA: 3' ucuGGGUCUCCGUCUGGGUCu 5' |**|||:||*||||||||||| target: 5' accCCCGGA-GCAGACCCAGa 3'	2508	2528	-39.9	0.000713	target: 5' CCCGGA-GCAGACCCAGAA 3' |**:||*|||||||||||* miRNA: 3' G--UCUCCGUCUGGGUCU- 5'	no
lcr-miR-N83	rna-XM_019263583.2	gene-LOC104935772	LOC104935772	RNA/RNP complex-1-interacting phosphatase	196	216	179	-36.01	miRNA: 3' ucUGGGUCUCCGUCUGGGUCu 5' |||||||||**|||||||||* target: 5' agACCCAGACCCAGACCCAGc 3'	163	183	-28.9	0.001064	target: 5' CAGACCCAGACCCAGC 3' ||||**|||||||||* miRNA: 3' GUCUCCGUCUGGGUCU 5'	no
lcr-miR-N83	rna-XM_010729610.3	gene-LOC104918005	LOC104918005	interferon-induced very large GTPase 1	343	361	160	-28.82	miRNA: 3' ucUGGGUCUCCGUCUGGGUCu 5' :*|||::|:|**||||||||: target: 5' gcACCTGGGG--AGACCCAGg 3'	304	324	-27.7	0.005811	target: 5' CUGGGG-AGACCCAGGA 3' |*|:||*||||||||:* miRNA: 3' GUCUCCGUCUGGGUCU- 5'	no
lcr-miR-N83	rna-XM_010730901.3	gene-LOC104919001	LOC104919001	sia-alpha-2,3-Gal-beta-1,4-GlcNAc-R:alpha 2,8-sialyltransferase	29	51	160	-31.33	miRNA: 3' ucuGGGUCUC-CGU-CUGGGUCu 5' :**:||||||**||*|||||||| target: 5' gacTCCAGAGACCATGACCCAGa 3'	27	47	-35.2	0.004105	target: 5' CCAGAGACCAUGACCCAGAU 3' ||||||**||*||||||||* miRNA: 3' GGUCUCC-GU-CUGGGUCU- 5'	no
lcr-miR-N83	rna-XM_027275133.1	gene-meis2	meis2	Meis homeobox 2, transcript variant X2	2329	2349	163	-32.1	miRNA: 3' ucUGGGUCUCCGUCUGGGUCu 5' |||||||****|||||||||: target: 5' agACCCAATCCCAGACCCAGg 3'	2321	2341	-35.3	0.003167	target: 5' AGACCCAAUCCCAGACCCAGGC 3' |||********|||||||||:* miRNA: 3' UCUCC------GUCUGGGUCU- 5'	no
lcr-miR-N83	rna-XM_027281105.1	gene-LOC104932418	LOC104932418	USP6 N-terminal-like protein, transcript variant X3	1181	1200	161	-23.79	miRNA: 3' ucUGGGUCUCCGUCUGGGUCu 5' :*||*|*|||*:||||||||* target: 5' gaACAC-GAGTTAGACCCAGt 3'	618	638	-30.6	0.009058	target: 5' CAGUAGAACACGAGUUAGACCCAGU 3' ||*********|||*:||||||||* miRNA: 3' GU---------CUCCGUCUGGGUCU 5'	no
lcr-miR-N83	rna-XM_027285143.1	gene-LOC104929637	LOC104929637	receptor-type tyrosine-protein phosphatase S-like, transcript variant X4	2089	2110	162	-31.51	miRNA: 3' ucUG-GGUCUCCGUCUGGGUCu 5' :*||*::|||||||||||:||* target: 5' gtACATTAGAGGCAGACCTAGt 3'	2082	2102	-35.1	0.002375	target: 5' UACAUUAGAGGCAGACCUAGU 3' ****::|||||||||||:||* miRNA: 3' ----GGUCUCCGUCUGGGUCU 5'	no
lcr-miR-N83	rna-XM_019254261.2	gene-fam240a	fam240a	family with sequence similarity 240 member A	635	655	163	-26.58	miRNA: 3' ucUGGGUCUCCGUCUGGGUCu 5' **|*|::||*|*||||||||| target: 5' ccAACTGGAAGGAGACCCAGa 3'	626	646	-33.7	0.000484	target: 5' CGUCCAACUGGAAGG-AGACCCAGAA 3' |********:|*|||*|||||||||* miRNA: 3' G--------UC-UCCGUCUGGGUCU- 5'	no
lcr-miR-N83	rna-XM_010733637.3	gene-LOC104921177	LOC104921177	stonustoxin subunit alpha, transcript variant X2	286	306	162	-28.54	miRNA: 3' ucuGGGUCUCCGUCUGGGUCu 5' ***|||*|:*|*||||||||| target: 5' cttCCCTGGAGAAGACCCAGa 3'	289	309	-30.9	0.002422	target: 5' GGAGA-AGACCCAGAA 3' :|||**|||||||||* miRNA: 3' UCUCCGUCUGGGUCU- 5'	no
lcr-miR-N83	rna-XM_019273502.2	gene-LOC104928754	LOC104928754	uncharacterized protein C11orf95 homolog, transcript variant X1	546	567	170	-37.4	miRNA: 3' ucUGGGU-CUCCGUCUGGGUCu 5' |||:|||*||||*:|||||||: target: 5' agATCCAGGAGGGGGACCCAGg 3'	545	565	-40	0.000248	target: 5' CAGGAGGGGGACCCAGGA 3' ||*||||*:|||||||:* miRNA: 3' GU-CUCCGUCUGGGUCU- 5'	no
lcr-miR-N83	rna-XM_027281140.1	gene-LOC104932139	LOC104932139	histone-binding protein RBBP7	30	52	161	-28.46	miRNA: 3' ucuGGGUCUC--CGUCUGGGUCu 5' |**|||*|||***|||||||||* target: 5' actCCCTGAGCTCCAGACCCAGc 3'	32	52	-29.9	0.000917	target: 5' UGAGCUCCAGACCCAGC 3' *|||***|||||||||* miRNA: 3' UCUCC--GUCUGGGUCU 5'	no
lcr-miR-N83	rna-XM_027273945.1	gene-LOC104938060	LOC104938060	disks large homolog 4, transcript variant X6	360	380	164	-28.89	miRNA: 3' ucuggGUCUCCGUCUGGGUCu 5' :****||||||**|||||||* target: 5' gacagCAGAGGGTGACCCAGc 3'	358	378	-38.3	6.6e-05	target: 5' GCAGAGGGUGACCCAGC 3' *||||||**|||||||* miRNA: 3' -GUCUCCGUCUGGGUCU 5'	no
lcr-miR-N83	rna-XM_019257863.2	gene-sbf1	sbf1	SET binding factor 1, transcript variant X2	3548	3567	161	-27.71	miRNA: 3' ucUGGGUCUCCGUCUGGGUCu 5' **|:||||***|||||||||* target: 5' ccATCCAG-TTCAGACCCAGc 3'	5265	5285	-36.7	0.003093	target: 5' UGGAGCUCUGCAGAACCCAGAC 3' ::|||****||||*|||||||* miRNA: 3' GUCUC----CGUC-UGGGUCU- 5'	no
lcr-miR-N83	rna-XM_027286651.1	gene-LOC104939032	LOC104939032	bcl-2/adenovirus E1B 19 kDa-interacting protein 2-like protein, transcript variant X1	28	48	162	-30.51	miRNA: 3' ucuggguCUCCGUCUGGGUCu 5' *******||*||||||||||: target: 5' tccaggtGAAGCAGACCCAGg 3'	24	44	-33.7	0.000155	target: 5' CAGGUGAAGCAGACCCAGGG 3' |||:****||||||||||:* miRNA: 3' GUCUC---CGUCUGGGUCU- 5'	no
lcr-miR-N83	rna-XM_027285141.1	gene-LOC104929637	LOC104929637	receptor-type tyrosine-protein phosphatase S-like, transcript variant X4	2089	2110	162	-31.51	miRNA: 3' ucUG-GGUCUCCGUCUGGGUCu 5' :*||*::|||||||||||:||* target: 5' gtACATTAGAGGCAGACCTAGt 3'	2082	2102	-35.1	0.002375	target: 5' UACAUUAGAGGCAGACCUAGU 3' ****::|||||||||||:||* miRNA: 3' ----GGUCUCCGUCUGGGUCU 5'	no
lcr-miR-N83	rna-XM_027279727.1	gene-arhgef6	arhgef6	Rac/Cdc42 guanine nucleotide exchange factor 6, transcript variant X1	1682	1702	162	-27.67	miRNA: 3' ucuGGGUCUCCGUCUGGGUCu 5' :**|:|*|:|*:||||||||* target: 5' gacCTCTGGGTTAGACCCAGc 3'	1680	1700	-32.6	0.00653	target: 5' CUGGGUUAGACCCAGC 3' **:||*:||||||||* miRNA: 3' UCUCC-GUCUGGGUCU 5'	no
lcr-miR-N83	rna-XM_027273939.1	gene-LOC104938060	LOC104938060	disks large homolog 4, transcript variant X6	360	380	164	-28.89	miRNA: 3' ucuggGUCUCCGUCUGGGUCu 5' :****||||||**|||||||* target: 5' gacagCAGAGGGTGACCCAGc 3'	358	378	-38.3	6.6e-05	target: 5' GCAGAGGGUGACCCAGC 3' *||||||**|||||||* miRNA: 3' -GUCUCCGUCUGGGUCU 5'	no
lcr-miR-N83	rna-XM_027279730.1	gene-arhgef6	arhgef6	Rac/Cdc42 guanine nucleotide exchange factor 6, transcript variant X1	1682	1702	162	-27.67	miRNA: 3' ucuGGGUCUCCGUCUGGGUCu 5' :**|:|*|:|*:||||||||* target: 5' gacCTCTGGGTTAGACCCAGc 3'	1680	1700	-32.6	0.00653	target: 5' CUGGGUUAGACCCAGC 3' **:||*:||||||||* miRNA: 3' UCUCC-GUCUGGGUCU 5'	no
lcr-miR-N83	rna-XM_027286696.1	gene-LOC113747301	LOC113747301	LIM domain transcription factor LMO4.1-like, transcript variant X2	211	231	171	-28.59	miRNA: 3' ucUGGGUCUCCGUCUGGGUCu 5' |*:||*:|||*|||||||||* target: 5' atGCCAGGAGCCAGACCCAGc 3'	208	228	-31.8	0.000181	target: 5' CCAGGAGCCAGACCCAGC 3' |||*|||*|||||||||* miRNA: 3' GGU-CUCCGUCUGGGUCU 5'	no
lcr-miR-N83	rna-XM_027291416.1	gene-erbb4	erbb4	erb-b2 receptor tyrosine kinase 4, transcript variant X1	3437	3458	162	-26.84	miRNA: 3' ucUGGGUCU-CCGUCUGGGUCu 5' **|*::|||**||||||||||: target: 5' taAATTAGACTGCAGACCCAGg 3'	3429	3449	-33.4	0.009827	target: 5' AAAUUAGACUGCAGACCCAGGC 3' *****|||**||||||||||:* miRNA: 3' -----UCUC-CGUCUGGGUCU- 5'	no
lcr-miR-N83	rna-XM_027290679.1	gene-acvr1c	acvr1c	activin A receptor type 1C	149	170	165	-36.57	miRNA: 3' ucuGGGUCUC-CGUCUGGGUCu 5' |**|||||||*|||||:||||: target: 5' accCCCAGAGAGCAGATCCAGg 3'	151	171	-38.2	6.9e-05	target: 5' AGAGAGCAGAUCCAGGU 3' ||||*|||||:||||:* miRNA: 3' UCUC-CGUCUGGGUCU- 5'	no
lcr-miR-N83	rna-XM_019278717.2	gene-ogdh	ogdh	oxoglutarate dehydrogenase, transcript variant X2	405	425	163	-26.4	miRNA: 3' ucUGGGUCUCCGUCUGGGUCu 5' **::::*|*|||||||||||| target: 5' ctGTTTTGTGGCAGACCCAGa 3'	401	421	-33.8	0.001252	target: 5' UGUUUUGUGGCAGACCCAGAC 3' ******|*||||||||||||* miRNA: 3' U-----CUCCGUCUGGGUCU- 5'	no
lcr-miR-N83	rna-XM_027275132.1	gene-meis2	meis2	Meis homeobox 2, transcript variant X2	2329	2349	163	-32.1	miRNA: 3' ucUGGGUCUCCGUCUGGGUCu 5' |||||||****|||||||||: target: 5' agACCCAATCCCAGACCCAGg 3'	2321	2341	-35.3	0.003167	target: 5' AGACCCAAUCCCAGACCCAGGC 3' |||********|||||||||:* miRNA: 3' UCUCC------GUCUGGGUCU- 5'	no
lcr-miR-N83	rna-XM_027278256.1	gene-dtx1	dtx1	deltex E3 ubiquitin ligase 1, transcript variant X3	2617	2637	171	-31.58	miRNA: 3' ucUGGGUCUCCGUCUGGGUCu 5' *|||||||:*|:*|||||||* target: 5' tgACCCAGGCGTCGACCCAGt 3'	2615	2635	-34.5	0.005304	target: 5' AGGCGUCGACCCAGU 3' ||:*|:*|||||||* miRNA: 3' UCUCCGUCUGGGUCU 5'	no
lcr-miR-N83	rna-XM_027288665.1	gene-LOC104932572	LOC104932572	beta-1,4 N-acetylgalactosaminyltransferase 1, transcript variant X2	2037	2057	169	-36.54	miRNA: 3' ucugGGUCUCCGUCUGGGUCu 5' ||:*:|*||||:||||||||| target: 5' aggaTCTGAGGTAGACCCAGa 3'	2035	2055	-39.2	0.000398	target: 5' U-GAGGUAGACCCAGAU 3' :*||||:|||||||||* miRNA: 3' GUCUCCGUCUGGGUCU- 5'	no
lcr-miR-N83	rna-XM_027275517.1	gene-entpd6	entpd6	ectonucleoside triphosphate diphosphohydrolase 6 (putative)	66	86	165	-29.24	miRNA: 3' ucugGGUCUCCGUCUGGGUCu 5' **:*|||||**|:|||||||| target: 5' ccgaCCAGACCCGGACCCAGa 3'	55	75	-37.7	0.000326	target: 5' CAGACCCGACCAGACCCGGAC 3' ||||******|||||||:||* miRNA: 3' GUCUCC----GUCUGGGUCU- 5'	no
lcr-miR-N83	rna-XM_027281103.1	gene-LOC104932418	LOC104932418	USP6 N-terminal-like protein, transcript variant X3	1181	1200	161	-23.79	miRNA: 3' ucUGGGUCUCCGUCUGGGUCu 5' :*||*|*|||*:||||||||* target: 5' gaACAC-GAGTTAGACCCAGt 3'	618	638	-30.6	0.009058	target: 5' CAGUAGAACACGAGUUAGACCCAGU 3' ||*********|||*:||||||||* miRNA: 3' GU---------CUCCGUCUGGGUCU 5'	no
lcr-miR-N83	rna-XM_019279124.2	gene-paqr6	paqr6	progestin and adipoQ receptor family member 6, transcript variant X2	198	221	162	-25.73	miRNA: 3' ucUGGGUCUCCG---UCUGGGUCu 5' **||:||||*||***:|||||||* target: 5' ttACTCAGAAGCTGAGGACCCAGt 3'	199	219	-30	0.00496	target: 5' AGAAGCUGAGGACCCAGU 3' |||*||***:|||||||* miRNA: 3' UCUCCG---UCUGGGUCU 5'	no
lcr-miR-N83	rna-XM_027282734.1	gene-st7	st7	suppression of tumorigenicity 7, transcript variant X3	14	34	169	-30.72	miRNA: 3' ucugGGUCUCCGUCUGGGUCu 5' *|:*|||||**|||||||||: target: 5' cggaCCAGAATCAGACCCAGg 3'	14	34	-33.1	0.000203	target: 5' CAGAAUCAGACCCAGGA 3' ||||**|||||||||:* miRNA: 3' GUCUCCGUCUGGGUCU- 5'	no
lcr-miR-N83	rna-XM_019264779.2	gene-arsb	arsb	arylsulfatase B	871	890	168	-31.76	miRNA: 3' ucuGGGUCUCCGUCUGGGUCu 5' :|*|||||*||*||||||||: target: 5' ggcCCCAG-GGAAGACCCAGg 3'	870	890	-34.7	0.002571	target: 5' CAG-GGAAGACCCAGGA 3' |||*||*||||||||:* miRNA: 3' GUCUCCGUCUGGGUCU- 5'	no
lcr-miR-N83	rna-XM_027273740.1	gene-lrch2	lrch2	leucine rich repeats and calponin homology domain containing 2	1202	1222	171	-29.51	miRNA: 3' ucUGGGUCUCCGUCUGGGUCu 5' |||*|||||**|||||||||* target: 5' agAACCAGAACCAGACCCAGc 3'	1200	1220	-31.6	0.003948	target: 5' CCAACAUGGGCUAGGACCCAGC 3' |||****:|||**:|||||||* miRNA: 3' GGUC---UCCG--UCUGGGUCU 5'	no
lcr-miR-N83	rna-XM_027289039.1	gene-cep131	cep131	centrosomal protein 131, transcript variant X2	1908	1929	165	-36.32	miRNA: 3' ucuGGGUCU-CCGUCUGGGUCu 5' |**||||||*|||||||:|||: target: 5' aatCCCAGACGGCAGACTCAGg 3'	1909	1929	-37.5	0.000712	target: 5' AGACGGCAGACUCAGGC 3' |||*|||||||:|||:* miRNA: 3' UCU-CCGUCUGGGUCU- 5'	no
lcr-miR-N83	rna-XM_010757002.3	gene-e2f2	e2f2	E2F transcription factor 2, transcript variant X2	804	824	161	-26.05	miRNA: 3' ucugGGUCUCCGUCUGGGUCu 5' ||**|::||**|||||||||| target: 5' agtaCTGGACCCAGACCCAGa 3'	796	816	-32.1	0.004918	target: 5' CCAGUACUGGACCCAGACCCAGAG 3' ||||****||***||||||||||* miRNA: 3' GGUCU---CC---GUCUGGGUCU- 5'	no
lcr-miR-N83	rna-XM_027291413.1	gene-erbb4	erbb4	erb-b2 receptor tyrosine kinase 4, transcript variant X1	3437	3458	162	-26.84	miRNA: 3' ucUGGGUCU-CCGUCUGGGUCu 5' **|*::|||**||||||||||: target: 5' taAATTAGACTGCAGACCCAGg 3'	3429	3449	-33.4	0.009827	target: 5' AAAUUAGACUGCAGACCCAGGC 3' *****|||**||||||||||:* miRNA: 3' -----UCUC-CGUCUGGGUCU- 5'	no
lcr-miR-N148	rna-XM_027278227.1	gene-LOC104930405	LOC104930405	protocadherin gamma-C5, transcript variant X13	840	861	165	-30.43	miRNA: 3' ucCUACUUGGGCGA-CGUCUCCu 5' **||*|:|||*|||*|||||||: target: 5' caGA-GGACCGGCTGGCAGAGGg 3'	843	864	-33.2	0.005265	target: 5' GACCGGCUGGCAGAGGGU 3' :|||*|||*|||||||:* miRNA: 3' UUGGGCGA-CGUCUCCU- 5'	no
lcr-miR-N148	rna-XM_010736090.3	gene-col11a1	col11a1	collagen type XI alpha 1 chain, transcript variant X2	250	271	170	-26.9	miRNA: 3' uccuACUUGGGCGACGUCUCCu 5' ****|||||*||:*|||||||| target: 5' cattTGAACGCGTGGCAGAGGa 3'	245	266	-35.9	0.000417	target: 5' AUUUGAACGCGUGGCAGAGGAG 3' ***|||||*||:*||||||||* miRNA: 3' ---ACUUGGGCGACGUCUCCU- 5'	no
lcr-miR-N148	rna-XM_010738984.3	gene-LOC104925377	LOC104925377	transcription factor AP-4, transcript variant X2	209	230	161	-30.65	miRNA: 3' ucCUACUUGGGCG-ACGUCUCCu 5' ||||||*::|*||*||||||||| target: 5' agGATG-GTCAGCGTGCAGAGGa 3'	208	229	-33.7	0.002484	target: 5' GGUCA-GCGUGCAGAGGAG 3' |:*|**||*|||||||||* miRNA: 3' CUUGGGCG-ACGUCUCCU- 5'	no
lcr-miR-N148	rna-XM_027280756.1	gene-sptbn4	sptbn4	spectrin beta, non-erythrocytic 4, transcript variant X1	2016	2037	172	-26.83	miRNA: 3' ucCUACUUGGGCGACGUCUCCu 5' :*||*|*:|||*|||||||||* target: 5' gaGAAGCGCCCACTGCAGAGGc 3'	2005	2026	-34.2	0.006184	target: 5' UUUGAGAAGCGCCCACUGCAGAGGC 3' **|||*****:|||*|||||||||* miRNA: 3' --ACU-----UGGGCGACGUCUCCU 5'	no
lcr-miR-N148	rna-XM_010736152.3	gene-tfap2a	tfap2a	transcription factor AP-2 alpha, transcript variant X5	327	348	160	-26.01	miRNA: 3' ucCUACUUGGGCGACGUCUCCu 5' |*||**||***||||||||||| target: 5' aaGAGAAAAAAGCTGCAGAGGa 3'	330	351	-30.4	0.001848	target: 5' AAAAAAGCUGCAGAGGAA 3' ||****|||||||||||* miRNA: 3' UUGGG-CGACGUCUCCU- 5'	no
lcr-miR-N148	rna-XM_027278255.1	gene-LOC104930405	LOC104930405	protocadherin gamma-C5, transcript variant X13	840	861	165	-30.43	miRNA: 3' ucCUACUUGGGCGA-CGUCUCCu 5' **||*|:|||*|||*|||||||: target: 5' caGA-GGACCGGCTGGCAGAGGg 3'	843	864	-33.2	0.005265	target: 5' GACCGGCUGGCAGAGGGU 3' :|||*|||*|||||||:* miRNA: 3' UUGGGCGA-CGUCUCCU- 5'	no
lcr-miR-N148	rna-XM_019260872.2	gene-plcz1	plcz1	phospholipase C zeta 1, transcript variant X1	164	188	161	-26.83	miRNA: 3' uccuACUUGG---GCGACGUCUCCu 5' *|**||*||:***|||||||||||| target: 5' tgccTGCACTGTGCGCTGCAGAGGa 3'	167	188	-31.4	0.001525	target: 5' CACUGUGCGCUGCAGAGGAA 3' *||:***||||||||||||* miRNA: 3' UUGG---GCGACGUCUCCU- 5'	no
lcr-miR-N148	rna-XM_010742076.3	gene-dnmbp	dnmbp	dynamin binding protein, transcript variant X1	595	616	162	-20.55	miRNA: 3' uccuACUUGGGCGACGUCUCCu 5' :***||||*:**|||||||||* target: 5' gtttTGAAGTGTCTGCAGAGGc 3'	570	591	-29.3	0.008713	target: 5' GAUUAUCUACUGGUUGCUAGUUUUGAAGUGUCUGCAGAGGC 3' ||*************:|:**********:|*|||||||||* miRNA: 3' CU-------------UGG----------GC-GACGUCUCCU 5'	no
lcr-miR-N148	rna-XM_019253035.2	gene-tfap2a	tfap2a	transcription factor AP-2 alpha, transcript variant X5	327	348	160	-26.01	miRNA: 3' ucCUACUUGGGCGACGUCUCCu 5' |*||**||***||||||||||| target: 5' aaGAGAAAAAAGCTGCAGAGGa 3'	330	351	-30.4	0.001848	target: 5' AAAAAAGCUGCAGAGGAA 3' ||****|||||||||||* miRNA: 3' UUGGG-CGACGUCUCCU- 5'	no
lcr-miR-N148	rna-XM_027274690.1	gene-ralgapa2	ralgapa2	Ral GTPase activating protein catalytic alpha subunit 2, transcript variant X4	552	572	172	-29.12	miRNA: 3' uccuACUUGGGCGACGUCUCCu 5' *|**||||*|:||||||||||: target: 5' tgttTGAA-CTGCTGCAGAGGg 3'	555	576	-33.4	0.004348	target: 5' AA-CUGCUGCAGAGGGG 3' ||*|:||||||||||:* miRNA: 3' UUGGGCGACGUCUCCU- 5'	no
lcr-miR-N148	rna-XM_019273906.2	gene-LOC104919939	LOC104919939	rap guanine nucleotide exchange factor 3, transcript variant X1	1746	1770	162	-29.27	miRNA: 3' ucCUACUUGGGC-GA--CGUCUCCu 5' :||||||||**|*||**|||||||: target: 5' ggGATGAACAGGACTAAGCAGAGGg 3'	1744	1765	-33.4	0.007126	target: 5' GAACAGGACUAAGCAGAGGGA 3' ||||**|*||**|||||||:* miRNA: 3' CUUGGGC-GA--CGUCUCCU- 5'	no
lcr-miR-N148	rna-XM_010753145.3	gene-thap1	thap1	THAP domain containing 1	485	506	164	-26.52	miRNA: 3' uccuacUUGGGCGACGUCUCCu 5' ******|||**||||||||||: target: 5' tcaccaAACAAGCTGCAGAGGg 3'	479	500	-36.6	0.000317	target: 5' UCACCAAACAAGCUGCAGAGGGU 3' **|||******||||||||||:* miRNA: 3' CUUGGG-----CGACGUCUCCU- 5'	no
lcr-miR-N148	rna-XM_027283100.1	gene-rab11fip4	rab11fip4	RAB11 family interacting protein 4, transcript variant X2	1	18	161	-27.34	miRNA: 3' uccuacuugGGCGACGUCUCCu 5' *****|***|:||||||||||| target: 5' ----agctgCTGCTGCAGAGGa 3'	5	26	-31	0.004646	target: 5' --GCUGCUGCAGAGGAU 3' ***|:|||||||||||* miRNA: 3' UUGGGCGACGUCUCCU- 5'	no
lcr-miR-N148	rna-XM_019263902.2	gene-LOC104930405	LOC104930405	protocadherin gamma-C5, transcript variant X13	840	861	165	-30.43	miRNA: 3' ucCUACUUGGGCGA-CGUCUCCu 5' **||*|:|||*|||*|||||||: target: 5' caGA-GGACCGGCTGGCAGAGGg 3'	843	864	-33.2	0.005265	target: 5' GACCGGCUGGCAGAGGGU 3' :|||*|||*|||||||:* miRNA: 3' UUGGGCGA-CGUCUCCU- 5'	no
lcr-miR-N148	rna-XM_019265245.2	gene-ror1	ror1	receptor tyrosine kinase like orphan receptor 1, transcript variant X1	1156	1177	164	-27.07	miRNA: 3' uccuacUUGGGCGACGUCUCCu 5' ***|**|:|:*||||||||||| target: 5' ttcaaaAGCTGGCTGCAGAGGa 3'	1160	1181	-32.5	0.009465	target: 5' AGCUGGCUGCAGAGGAC 3' |:|:*|||||||||||* miRNA: 3' UUGGGCGACGUCUCCU- 5'	no
lcr-miR-N148	rna-XM_027285649.1	gene-LOC104921308	LOC104921308	major facilitator superfamily domain-containing protein 8-like	69	90	164	-27.94	miRNA: 3' uccuacUUGGGCGACGUCUCCu 5' |**|**|::::||||||||||| target: 5' aatacaAGTTTGCTGCAGAGGa 3'	40	61	-32.5	0.001105	target: 5' UGCCCUGCACUUCUGAAAGAAUCAAUACAAGUUUGCUGCAGAGGAU 3' *************||||**************:::|||||||||||* miRNA: 3' -------------ACUU--------------GGGCGACGUCUCCU- 5'	no
lcr-miR-N148	rna-XM_019253881.2	gene-acsf3	acsf3	acyl-CoA synthetase family member 3, transcript variant X2	149	171	167	-28.9	miRNA: 3' uccuacUUG-GGCGACGUCUCCu 5' |**|**|||*|:||||||||||| target: 5' atcacaAACACTGCTGCAGAGGa 3'	133	154	-38.2	0.00015	target: 5' AACACCUCCCAUCACAAACACUGCUGCAGAGGAA 3' |**|||:***************|||||||||||* miRNA: 3' U--UGGG---------------CGACGUCUCCU- 5'	no
lcr-miR-N148	rna-XM_010735718.3	gene-acsf3	acsf3	acyl-CoA synthetase family member 3, transcript variant X2	149	171	167	-28.9	miRNA: 3' uccuacUUG-GGCGACGUCUCCu 5' |**|**|||*|:||||||||||| target: 5' atcacaAACACTGCTGCAGAGGa 3'	133	154	-38.2	0.00015	target: 5' AACACCUCCCAUCACAAACACUGCUGCAGAGGAA 3' |**|||:***************|||||||||||* miRNA: 3' U--UGGG---------------CGACGUCUCCU- 5'	no
lcr-miR-N148	rna-XM_027289312.1	gene-dnmbp	dnmbp	dynamin binding protein, transcript variant X1	595	616	162	-20.55	miRNA: 3' uccuACUUGGGCGACGUCUCCu 5' :***||||*:**|||||||||* target: 5' gtttTGAAGTGTCTGCAGAGGc 3'	570	591	-29.3	0.008713	target: 5' GAUUAUCUACUGGUUGCUAGUUUUGAAGUGUCUGCAGAGGC 3' ||*************:|:**********:|*|||||||||* miRNA: 3' CU-------------UGG----------GC-GACGUCUCCU 5'	no
lcr-miR-N148	rna-XM_019259155.2	gene-vash2	vash2	vasohibin 2	607	627	170	-30.69	miRNA: 3' ucCUACUUGGGCGACGUCUCCu 5' :*||*|:||:|*|||||||||| target: 5' gaGA-GGACTCACTGCAGAGGa 3'	601	622	-33.8	0.009199	target: 5' GAGAGGACUCACUGCAGAGGAU 3' ****|:||:|*||||||||||* miRNA: 3' ----CUUGGGCGACGUCUCCU- 5'	no
lcr-miR-N148	rna-XM_010748995.3	gene-rps6kb1	rps6kb1	ribosomal protein S6 kinase B1, transcript variant X1	453	475	167	-32.5	miRNA: 3' ucCUACUUGGG-CGACGUCUCCu 5' *||:*|||::|*|:||||||||: target: 5' tgGGAGAATTCGGTTGCAGAGGg 3'	453	474	-34.5	0.002873	target: 5' GAAUUCGGUUGCAGAGGGG 3' |||::|*|:||||||||:* miRNA: 3' CUUGGG-CGACGUCUCCU- 5'	no
lcr-miR-N148	rna-XM_027274626.1	gene-mta1	mta1	metastasis associated 1, transcript variant X5	642	663	166	-28.16	miRNA: 3' uccuacuuGGGCGACGUCUCCu 5' :****|**|:|||||||||||* target: 5' gctcagtcCTCGCTGCAGAGGc 3'	639	660	-32.2	0.004856	target: 5' CAGUCCUCGCUGCAGAGGC 3' **|**|:|||||||||||* miRNA: 3' --CUUGGGCGACGUCUCCU 5'	no
lcr-miR-N148	rna-XM_019259925.2	gene-golm1	golm1	golgi membrane protein 1, transcript variant X2	1197	1218	161	-28.62	miRNA: 3' uccuaCUUGGGCGACGUCUCCu 5' :|*:*|:::|:||*|||||||* target: 5' ggaggGGGTCTGCAGCAGAGGc 3'	1195	1216	-33.4	0.007375	target: 5' GGGUCUGCAGCAGAGGC 3' |:::|:||*|||||||* miRNA: 3' CUUGGGCGACGUCUCCU 5'	no
lcr-miR-N148	rna-XM_010757077.3	gene-LOC104940465	LOC104940465	hypoxanthine-guanine phosphoribosyltransferase-like	2	22	174	-32.76	miRNA: 3' ucCUACUUGGGCGACGUCUCCu 5' *|||||||**:||||||||||* target: 5' tgGATGAA-GTGCTGCAGAGGt 3'	2	23	-35.1	0.000166	target: 5' AAGU-GCUGCAGAGGU 3' ||*:*||||||||||* miRNA: 3' UUGGGCGACGUCUCCU 5'	no
lcr-miR-N148	rna-XM_019253036.2	gene-tfap2a	tfap2a	transcription factor AP-2 alpha, transcript variant X5	327	348	160	-26.01	miRNA: 3' ucCUACUUGGGCGACGUCUCCu 5' |*||**||***||||||||||| target: 5' aaGAGAAAAAAGCTGCAGAGGa 3'	330	351	-30.4	0.001848	target: 5' AAAAAAGCUGCAGAGGAA 3' ||****|||||||||||* miRNA: 3' UUGGG-CGACGUCUCCU- 5'	no
lcr-miR-N148	rna-XM_027278794.1	gene-ipo9	ipo9	importin 9	125	144	160	-27.02	miRNA: 3' uccUACUUGGGCGACGUCUCCu 5' |**|||::||:|**|||||||| target: 5' atcATGGGCCTG--GCAGAGGa 3'	121	142	-34	0.00056	target: 5' CAUGGGCCUG--GCAGAGGAA 3' **||::||:|**||||||||* miRNA: 3' --ACUUGGGCGACGUCUCCU- 5'	no
lcr-miR-N148	rna-XM_010732474.3	gene-golm1	golm1	golgi membrane protein 1, transcript variant X2	1197	1218	161	-28.62	miRNA: 3' uccuaCUUGGGCGACGUCUCCu 5' :|*:*|:::|:||*|||||||* target: 5' ggaggGGGTCTGCAGCAGAGGc 3'	1195	1216	-33.4	0.007375	target: 5' GGGUCUGCAGCAGAGGC 3' |:::|:||*|||||||* miRNA: 3' CUUGGGCGACGUCUCCU 5'	no
lcr-miR-N148	rna-XM_027281637.1	gene-LOC104930384	LOC104930384	flocculation protein FLO11	69	90	160	-28.44	miRNA: 3' ucCUACUUGGGCGACGUCUCCu 5' |||:||||*:*|**|||||||: target: 5' agGGTGAAATGGGGGCAGAGGg 3'	68	89	-31.9	0.00043	target: 5' GAAAUGGGGGCAGAGGGG 3' |||*:*|**|||||||:* miRNA: 3' CUUGGGCGACGUCUCCU- 5'	no
lcr-miR-N148	rna-XM_027287844.1	gene-LOC104931914	LOC104931914	cadherin-12, transcript variant X2	149	171	163	-28.53	miRNA: 3' ucCUACUUGGGC-GACGUCUCCu 5' **|*|*|:||||**||||||||| target: 5' ctGTTTAGCCCGAGTGCAGAGGa 3'	145	166	-34.1	5.4e-05	target: 5' GUUUAGCCCGAGUGCAGAGGAU 3' |***|:||||**|||||||||* miRNA: 3' C---UUGGGCG-ACGUCUCCU- 5'	no
lcr-miR-N148	rna-XM_010751066.3	gene-LOC104935257	LOC104935257	monocarboxylate transporter 4, transcript variant X4	1381	1402	160	-26.01	miRNA: 3' uccuacUUGGGCGACGUCUCCu 5' :**:**|:*::||||||||||| target: 5' gttgacAGATTGCTGCAGAGGa 3'	1372	1393	-38.2	0.000581	target: 5' GGGUUGACAGAUUGCUGCAGAGGAA 3' |:::*******::|||||||||||* miRNA: 3' CUUG-------GGCGACGUCUCCU- 5'	no
lcr-miR-N148	rna-XM_019274650.2	gene-pbx3	pbx3	PBX homeobox 3, transcript variant X6	54	75	160	-24.58	miRNA: 3' ucCUACUUGGGCGACGUCUCCu 5' *||*|||*||**|*|||||||| target: 5' tgGCTGACCCAACAGCAGAGGa 3'	30	51	-30	0.000953	target: 5' UGGACUCUUUUAAAAACCUGGCUGACCCAACAGCAGAGGAU 3' ||:||:|*************|||*********||||||||* miRNA: 3' ACUUGGG-------------CGA---------CGUCUCCU- 5'	no
lcr-miR-N148	rna-XM_027278234.1	gene-LOC104930405	LOC104930405	protocadherin gamma-C5, transcript variant X13	840	861	165	-30.43	miRNA: 3' ucCUACUUGGGCGA-CGUCUCCu 5' **||*|:|||*|||*|||||||: target: 5' caGA-GGACCGGCTGGCAGAGGg 3'	843	864	-33.2	0.005265	target: 5' GACCGGCUGGCAGAGGGU 3' :|||*|||*|||||||:* miRNA: 3' UUGGGCGA-CGUCUCCU- 5'	no
lcr-miR-N148	rna-XM_010729782.3	gene-LOC104918135	LOC104918135	transmembrane protein 116, transcript variant X2	395	415	166	-24.84	miRNA: 3' ucCUACUUGGGCGACGUCUCCu 5' :*||||*||*:||*|||||||: target: 5' gtGATG-ACATGCAGCAGAGGg 3'	390	411	-29.7	0.005477	target: 5' UGAUGACAUGCAGCAGAGGGC 3' |||**||*:||*|||||||:* miRNA: 3' ACU--UGGGCGACGUCUCCU- 5'	no
lcr-miR-N148	rna-XM_010736892.3	gene-LOC104923568	LOC104923568	F-box only protein 11, transcript variant X4	173	195	163	-29.81	miRNA: 3' ucCUAC-UUGGGCGACGUCUCCu 5' :*|:||*||***||||||||||| target: 5' gaGGTGAAAGAGGCTGCAGAGGa 3'	173	194	-33.7	0.001909	target: 5' GAAAGAGGCUGCAGAGGAA 3' |||****|||||||||||* miRNA: 3' CUUGGG-CGACGUCUCCU- 5'	no
lcr-miR-N148	rna-XM_027278282.1	gene-LOC104930405	LOC104930405	protocadherin gamma-C5, transcript variant X13	840	861	165	-30.43	miRNA: 3' ucCUACUUGGGCGA-CGUCUCCu 5' **||*|:|||*|||*|||||||: target: 5' caGA-GGACCGGCTGGCAGAGGg 3'	843	864	-33.2	0.005265	target: 5' GACCGGCUGGCAGAGGGU 3' :|||*|||*|||||||:* miRNA: 3' UUGGGCGA-CGUCUCCU- 5'	no
lcr-miR-N148	rna-XM_027285297.1	gene-LOC109136703	LOC109136703	neurabin-1, transcript variant X6	179	199	160	-26.37	miRNA: 3' uccuACUUGGGCGACGUCUCCu 5' ****||:|||:|**|||||||* target: 5' tcttTGGACCTG-AGCAGAGGt 3'	182	203	-29.8	0.007615	target: 5' GACCUGA-GCAGAGGU 3' :|||:|**|||||||* miRNA: 3' UUGGGCGACGUCUCCU 5'	no
lcr-miR-N148	rna-XM_010736093.3	gene-col11a1	col11a1	collagen type XI alpha 1 chain, transcript variant X2	250	271	170	-26.9	miRNA: 3' uccuACUUGGGCGACGUCUCCu 5' ****|||||*||:*|||||||| target: 5' cattTGAACGCGTGGCAGAGGa 3'	245	266	-35.9	0.000417	target: 5' AUUUGAACGCGUGGCAGAGGAG 3' ***|||||*||:*||||||||* miRNA: 3' ---ACUUGGGCGACGUCUCCU- 5'	no
lcr-miR-N148	rna-XM_027285299.1	gene-LOC109136703	LOC109136703	neurabin-1, transcript variant X6	179	199	160	-26.37	miRNA: 3' uccuACUUGGGCGACGUCUCCu 5' ****||:|||:|**|||||||* target: 5' tcttTGGACCTG-AGCAGAGGt 3'	182	203	-29.8	0.007615	target: 5' GACCUGA-GCAGAGGU 3' :|||:|**|||||||* miRNA: 3' UUGGGCGACGUCUCCU 5'	no
lcr-miR-N148	rna-XM_010730508.3	gene-LOC104918680	LOC104918680	dedicator of cytokinesis protein 7, transcript variant X2	777	797	165	-26.65	miRNA: 3' uccUACUUGGGCGACGUCUCCu 5' :**|||:|*::|:||||||||: target: 5' gaaATGGA-TTGTTGCAGAGGg 3'	774	795	-32.6	0.002622	target: 5' AUGGA-UUGUUGCAGAGGGA 3' *||:|*::|:||||||||:* miRNA: 3' -ACUUGGGCGACGUCUCCU- 5'	no
lcr-miR-N148	rna-XM_010745190.3	gene-LOC104930405	LOC104930405	protocadherin gamma-C5, transcript variant X13	840	861	165	-30.43	miRNA: 3' ucCUACUUGGGCGA-CGUCUCCu 5' **||*|:|||*|||*|||||||: target: 5' caGA-GGACCGGCTGGCAGAGGg 3'	843	864	-33.2	0.005265	target: 5' GACCGGCUGGCAGAGGGU 3' :|||*|||*|||||||:* miRNA: 3' UUGGGCGA-CGUCUCCU- 5'	no
lcr-miR-N148	rna-XM_019263903.2	gene-LOC104930405	LOC104930405	protocadherin gamma-C5, transcript variant X13	840	861	165	-30.43	miRNA: 3' ucCUACUUGGGCGA-CGUCUCCu 5' **||*|:|||*|||*|||||||: target: 5' caGA-GGACCGGCTGGCAGAGGg 3'	843	864	-33.2	0.005265	target: 5' GACCGGCUGGCAGAGGGU 3' :|||*|||*|||||||:* miRNA: 3' UUGGGCGA-CGUCUCCU- 5'	no
lcr-miR-N148	rna-XM_027289385.1	gene-mta3	mta3	metastasis associated 1 family member 3, transcript variant X2	1105	1126	167	-29.44	miRNA: 3' uccUACUUGGGCGACGUCUCCu 5' ***||***||:||||||||||: target: 5' tctATCTCCCTGCTGCAGAGGg 3'	1111	1132	-32.8	0.002677	target: 5' -CCCUGCUGCAGAGGGU 3' **||:||||||||||:* miRNA: 3' UUGGGCGACGUCUCCU- 5'	no
lcr-miR-N148	rna-XM_027273064.1	gene-plcz1	plcz1	phospholipase C zeta 1, transcript variant X1	164	188	161	-26.83	miRNA: 3' uccuACUUGG---GCGACGUCUCCu 5' *|**||*||:***|||||||||||| target: 5' tgccTGCACTGTGCGCTGCAGAGGa 3'	167	188	-31.4	0.001525	target: 5' CACUGUGCGCUGCAGAGGAA 3' *||:***||||||||||||* miRNA: 3' UUGG---GCGACGUCUCCU- 5'	no
lcr-miR-N148	rna-XM_027288403.1	gene-tpd52l2	tpd52l2	TPD52 like 2, transcript variant X1	2413	2434	168	-25.07	miRNA: 3' uccuacUUGGGCGACGUCUCCu 5' :*****|:||*||||||||||* target: 5' gctcacAGCCAGCTGCAGAGGc 3'	2401	2422	-33	0.006319	target: 5' AGCCCGCUCACAGCCAGCUGCAGAGGC 3' |:|||||***********||||||||* miRNA: 3' UUGGGCG-----------ACGUCUCCU 5'	no
lcr-miR-N148	rna-XM_010752397.3	gene-LOC104936370	LOC104936370	neural proliferation differentiation and control protein 1	83	106	162	-27.05	miRNA: 3' uccUACUU--GGGCGACGUCUCCu 5' :**|||:|**|:||:*|||||||| target: 5' gaaATGGAGGCTCGTGGCAGAGGa 3'	87	108	-32.8	0.001504	target: 5' GGCUCGUGGCAGAGGAC 3' ::|:||:*||||||||* miRNA: 3' UUGGGCGACGUCUCCU- 5'	no
lcr-miR-N148	rna-XM_010753347.3	gene-il20rb	il20rb	interleukin 20 receptor subunit beta	133	154	164	-29.37	miRNA: 3' ucCUACUUGGGCGACGUCUCCu 5' **|:|||****||||||||||| target: 5' caGGTGACAAAGCTGCAGAGGa 3'	133	154	-33	0.000285	target: 5' G-ACAAAGCUGCAGAGGAC 3' |*||***|||||||||||* miRNA: 3' CUUGGG-CGACGUCUCCU- 5'	no
lcr-miR-N148	rna-XM_010750406.3	gene-serf2	serf2	small EDRK-rich factor 2	212	234	166	-28.89	miRNA: 3' uccUACUUGGGCG-ACGUCUCCu 5' |**|||:*:|:||*||||||||| target: 5' acaATGGTTCTGCATGCAGAGGa 3'	214	235	-30.8	0.000793	target: 5' GUUCUGCAUGCAGAGGAG 3' :*:|:||*|||||||||* miRNA: 3' UUGGGCG-ACGUCUCCU- 5'	no
lcr-miR-N148	rna-XM_019271835.2	gene-camsap1	camsap1	calmodulin regulated spectrin associated protein 1, transcript variant X1	106	129	163	-27.32	miRNA: 3' uccuacUUGGGCGA--CGUCUCCu 5' :**:**||||:|||**|||||||* target: 5' gctggaAACCTGCTCGGCAGAGGc 3'	102	123	-33.1	0.004386	target: 5' UGGAAACCUGCUCGGCAGAGGC 3' ||:**|||:|||**|||||||* miRNA: 3' ACU--UGGGCGA--CGUCUCCU 5'	no
lcr-miR-N148	rna-XM_027290488.1	gene-slc39a3	slc39a3	solute carrier family 39 member 3, transcript variant X4	83	103	174	-31.81	miRNA: 3' ucCUACUUGGGCGACGUCUCCu 5' *|||*||||:|*|||||||||* target: 5' tgGACGAACTC-CTGCAGAGGt 3'	83	104	-34.7	2.5e-05	target: 5' AACUC-CUGCAGAGGU 3' |||:|*|||||||||* miRNA: 3' UUGGGCGACGUCUCCU 5'	no
lcr-miR-N148	rna-XM_010755232.3	gene-dmrt3	dmrt3	doublesex and mab-3 related transcription factor 3	12	35	171	-29.95	miRNA: 3' ucCUACUUGG--GCGACGUCUCCu 5' |*||||:||:**|||*|||||||| target: 5' atGATGGACTAACGCAGCAGAGGa 3'	13	34	-34.4	8e-05	target: 5' GACUAACGCAGCAGAGGAC 3' :||:**|||*||||||||* miRNA: 3' UUGG--GCGACGUCUCCU- 5'	no
lcr-miR-N148	rna-XM_019260394.2	gene-wac	wac	WW domain containing adaptor with coiled-coil	519	541	165	-27.97	miRNA: 3' uccuACUUGGGCG-ACGUCUCCu 5' ****||||||*||**|||||||| target: 5' tcacTGAACCGGCGAGCAGAGGa 3'	515	536	-36.8	0.000559	target: 5' ACUGAACCGGCGAGCAGAGGAG 3' **||||||*||**||||||||* miRNA: 3' --ACUUGGGCGA-CGUCUCCU- 5'	no
lcr-miR-N148	rna-XM_019274219.2	gene-LOC104931914	LOC104931914	cadherin-12, transcript variant X2	149	171	163	-28.53	miRNA: 3' ucCUACUUGGGC-GACGUCUCCu 5' **|*|*|:||||**||||||||| target: 5' ctGTTTAGCCCGAGTGCAGAGGa 3'	145	166	-34.1	5.4e-05	target: 5' GUUUAGCCCGAGUGCAGAGGAU 3' |***|:||||**|||||||||* miRNA: 3' C---UUGGGCG-ACGUCUCCU- 5'	no
lcr-miR-N148	rna-XM_027280755.1	gene-sptbn4	sptbn4	spectrin beta, non-erythrocytic 4, transcript variant X1	2016	2037	172	-26.83	miRNA: 3' ucCUACUUGGGCGACGUCUCCu 5' :*||*|*:|||*|||||||||* target: 5' gaGAAGCGCCCACTGCAGAGGc 3'	2005	2026	-34.2	0.006184	target: 5' UUUGAGAAGCGCCCACUGCAGAGGC 3' **|||*****:|||*|||||||||* miRNA: 3' --ACU-----UGGGCGACGUCUCCU 5'	no
lcr-miR-N148	rna-XM_027288404.1	gene-tpd52l2	tpd52l2	TPD52 like 2, transcript variant X1	2413	2434	168	-25.07	miRNA: 3' uccuacUUGGGCGACGUCUCCu 5' :*****|:||*||||||||||* target: 5' gctcacAGCCAGCTGCAGAGGc 3'	2401	2422	-33	0.006319	target: 5' AGCCCGCUCACAGCCAGCUGCAGAGGC 3' |:|||||***********||||||||* miRNA: 3' UUGGGCG-----------ACGUCUCCU 5'	no
lcr-miR-N148	rna-XM_019270268.2	gene-LOC104918489	LOC104918489	zinc finger protein GLIS1, transcript variant X2	1687	1708	172	-27.49	miRNA: 3' uccuacUUGGGCGACGUCUCCu 5' ***:**|||||||*|||||||* target: 5' tttgcaAACCCGCAGCAGAGGc 3'	1683	1704	-31.9	0.00682	target: 5' GCAAACCCGCAGCAGAGGC 3' |**|||||||*|||||||* miRNA: 3' C--UUGGGCGACGUCUCCU 5'	no
lcr-miR-N148	rna-XM_010736150.3	gene-tfap2a	tfap2a	transcription factor AP-2 alpha, transcript variant X5	327	348	160	-26.01	miRNA: 3' ucCUACUUGGGCGACGUCUCCu 5' |*||**||***||||||||||| target: 5' aaGAGAAAAAAGCTGCAGAGGa 3'	330	351	-30.4	0.001848	target: 5' AAAAAAGCUGCAGAGGAA 3' ||****|||||||||||* miRNA: 3' UUGGG-CGACGUCUCCU- 5'	no
lcr-miR-N148	rna-XM_027288408.1	gene-tpd52l2	tpd52l2	TPD52 like 2, transcript variant X1	2836	2857	168	-25.07	miRNA: 3' uccuacUUGGGCGACGUCUCCu 5' :*****|:||*||||||||||* target: 5' gctcacAGCCAGCTGCAGAGGc 3'	2824	2845	-33	0.007742	target: 5' AGCCCGCUCACAGCCAGCUGCAGAGGC 3' |:|||||***********||||||||* miRNA: 3' UUGGGCG-----------ACGUCUCCU 5'	no
lcr-miR-N148	rna-XM_027278244.1	gene-LOC104930405	LOC104930405	protocadherin gamma-C5, transcript variant X13	840	861	165	-30.43	miRNA: 3' ucCUACUUGGGCGA-CGUCUCCu 5' **||*|:|||*|||*|||||||: target: 5' caGA-GGACCGGCTGGCAGAGGg 3'	843	864	-33.2	0.005265	target: 5' GACCGGCUGGCAGAGGGU 3' :|||*|||*|||||||:* miRNA: 3' UUGGGCGA-CGUCUCCU- 5'	no
lcr-miR-N148	rna-XM_027289384.1	gene-mta3	mta3	metastasis associated 1 family member 3, transcript variant X2	1105	1126	167	-29.44	miRNA: 3' uccUACUUGGGCGACGUCUCCu 5' ***||***||:||||||||||: target: 5' tctATCTCCCTGCTGCAGAGGg 3'	1111	1132	-32.8	0.002677	target: 5' -CCCUGCUGCAGAGGGU 3' **||:||||||||||:* miRNA: 3' UUGGGCGACGUCUCCU- 5'	no
lcr-miR-N148	rna-XM_010751625.3	gene-slc39a3	slc39a3	solute carrier family 39 member 3, transcript variant X4	83	103	174	-31.81	miRNA: 3' ucCUACUUGGGCGACGUCUCCu 5' *|||*||||:|*|||||||||* target: 5' tgGACGAACTC-CTGCAGAGGt 3'	83	104	-34.7	2.5e-05	target: 5' AACUC-CUGCAGAGGU 3' |||:|*|||||||||* miRNA: 3' UUGGGCGACGUCUCCU 5'	no
lcr-miR-N148	rna-XM_027285301.1	gene-LOC109136703	LOC109136703	neurabin-1, transcript variant X6	179	199	160	-26.37	miRNA: 3' uccuACUUGGGCGACGUCUCCu 5' ****||:|||:|**|||||||* target: 5' tcttTGGACCTG-AGCAGAGGt 3'	182	203	-29.8	0.007615	target: 5' GACCUGA-GCAGAGGU 3' :|||:|**|||||||* miRNA: 3' UUGGGCGACGUCUCCU 5'	no
lcr-miR-N148	rna-XM_019271833.2	gene-camsap1	camsap1	calmodulin regulated spectrin associated protein 1, transcript variant X1	106	129	163	-27.32	miRNA: 3' uccuacUUGGGCGA--CGUCUCCu 5' :**:**||||:|||**|||||||* target: 5' gctggaAACCTGCTCGGCAGAGGc 3'	102	123	-33.1	0.004386	target: 5' UGGAAACCUGCUCGGCAGAGGC 3' ||:**|||:|||**|||||||* miRNA: 3' ACU--UGGGCGA--CGUCUCCU 5'	no
lcr-miR-N148	rna-XM_027278253.1	gene-LOC104930405	LOC104930405	protocadherin gamma-C5, transcript variant X13	840	861	165	-30.43	miRNA: 3' ucCUACUUGGGCGA-CGUCUCCu 5' **||*|:|||*|||*|||||||: target: 5' caGA-GGACCGGCTGGCAGAGGg 3'	843	864	-33.2	0.005265	target: 5' GACCGGCUGGCAGAGGGU 3' :|||*|||*|||||||:* miRNA: 3' UUGGGCGA-CGUCUCCU- 5'	no
lcr-miR-N148	rna-XM_027272193.1	gene-LOC113744060	LOC113744060	glucagon family neuropeptides-like, transcript variant X2	2218	2240	170	-30.09	miRNA: 3' uccUACUUGGGCG-ACGUCUCCu 5' *|*:|||:|*|||*||||||||* target: 5' tgtGTGAGCGCGCATGCAGAGGt 3'	2218	2239	-33	0.006008	target: 5' AGCGCGCAUGCAGAGGU 3' |:|*|||*||||||||* miRNA: 3' UUGGGCG-ACGUCUCCU 5'	no
lcr-miR-N148	rna-XM_019264785.2	gene-dnmbp	dnmbp	dynamin binding protein, transcript variant X1	595	616	162	-20.55	miRNA: 3' uccuACUUGGGCGACGUCUCCu 5' :***||||*:**|||||||||* target: 5' gtttTGAAGTGTCTGCAGAGGc 3'	570	591	-29.3	0.008713	target: 5' GAUUAUCUACUGGUUGCUAGUUUUGAAGUGUCUGCAGAGGC 3' ||*************:|:**********:|*|||||||||* miRNA: 3' CU-------------UGG----------GC-GACGUCUCCU 5'	no
lcr-miR-N148	rna-XM_027287166.1	gene-LOC104931065	LOC104931065	spliceosome RNA helicase DDX39B, transcript variant X1	162	183	162	-27.14	miRNA: 3' uccuacuuGGGCGACGUCUCCu 5' :****|**|||*|||||||||| target: 5' gtacagctCCCTCTGCAGAGGa 3'	166	187	-30.6	0.000938	target: 5' CUCCCUCUGCAGAGGAG 3' **|||*||||||||||* miRNA: 3' UUGGGCGACGUCUCCU- 5'	no
lcr-miR-N148	rna-XM_019253995.2	gene-sigirr	sigirr	single Ig and TIR domain containing	275	296	166	-23.27	miRNA: 3' uccuACUUGGGCGACGUCUCCu 5' ****|||:|:|*|*|||||||: target: 5' tcttTGAGCTCCCAGCAGAGGg 3'	278	299	-28.6	0.005827	target: 5' AGCUCCCAGCAGAGGGC 3' |:|:|*|*|||||||:* miRNA: 3' UUGGGCGACGUCUCCU- 5'	no
lcr-miR-N148	rna-XM_027278202.1	gene-LOC104930405	LOC104930405	protocadherin gamma-C5, transcript variant X13	840	861	165	-30.43	miRNA: 3' ucCUACUUGGGCGA-CGUCUCCu 5' **||*|:|||*|||*|||||||: target: 5' caGA-GGACCGGCTGGCAGAGGg 3'	843	864	-33.2	0.005265	target: 5' GACCGGCUGGCAGAGGGU 3' :|||*|||*|||||||:* miRNA: 3' UUGGGCGA-CGUCUCCU- 5'	no
lcr-miR-N148	rna-XM_010753749.3	gene-LOC104937512	LOC104937512	D(1)-like dopamine receptor	1416	1436	170	-29.42	miRNA: 3' ucCUACUUGGGCGACGUCUCCu 5' **|:||||*|:|*||||||||: target: 5' ctGGTGAAGCTG-TGCAGAGGg 3'	1416	1437	-31.6	0.007194	target: 5' AAGCUG-UGCAGAGGGU 3' ||*|:|*||||||||:* miRNA: 3' UUGGGCGACGUCUCCU- 5'	no
lcr-miR-N148	rna-XM_027278184.1	gene-LOC104930405	LOC104930405	protocadherin gamma-C5, transcript variant X13	840	861	165	-30.43	miRNA: 3' ucCUACUUGGGCGA-CGUCUCCu 5' **||*|:|||*|||*|||||||: target: 5' caGA-GGACCGGCTGGCAGAGGg 3'	843	864	-33.2	0.005265	target: 5' GACCGGCUGGCAGAGGGU 3' :|||*|||*|||||||:* miRNA: 3' UUGGGCGA-CGUCUCCU- 5'	no
lcr-miR-N148	rna-XM_027283048.1	gene-LOC104921153	LOC104921153	axin-1, transcript variant X1	314	335	160	-29.01	miRNA: 3' ucCUACUUGGGCGACGUCUCCu 5' **||||||*|||**||:||||| target: 5' caGATGAAACCGGAGCGGAGGa 3'	315	336	-35	0.00349	target: 5' AAACCGGAGCGGAGGAA 3' ||*|||**||:|||||* miRNA: 3' UUGGGCGACGUCUCCU- 5'	no
lcr-miR-N148	rna-XM_010756870.3	gene-LOC104940300	LOC104940300	brain-specific angiogenesis inhibitor 1-associated protein 2, transcript variant X2	1150	1171	164	-30.54	miRNA: 3' ucCUACUUGGGCGACGUCUCCu 5' :*|:*||:|::|:*|||||||* target: 5' gaGGAGAGCTTGTAGCAGAGGt 3'	1149	1170	-33.6	0.002153	target: 5' GAGCUUGUAGCAGAGGU 3' ||:|::|:*|||||||* miRNA: 3' CUUGGGCGACGUCUCCU 5'	no
lcr-miR-N148	rna-XM_027274624.1	gene-mta1	mta1	metastasis associated 1, transcript variant X5	642	663	166	-28.16	miRNA: 3' uccuacuuGGGCGACGUCUCCu 5' :****|**|:|||||||||||* target: 5' gctcagtcCTCGCTGCAGAGGc 3'	639	660	-32.2	0.004856	target: 5' CAGUCCUCGCUGCAGAGGC 3' **|**|:|||||||||||* miRNA: 3' --CUUGGGCGACGUCUCCU 5'	no
lcr-miR-N148	rna-XM_027278275.1	gene-LOC104930405	LOC104930405	protocadherin gamma-C5, transcript variant X13	840	861	165	-30.43	miRNA: 3' ucCUACUUGGGCGA-CGUCUCCu 5' **||*|:|||*|||*|||||||: target: 5' caGA-GGACCGGCTGGCAGAGGg 3'	843	864	-33.2	0.005265	target: 5' GACCGGCUGGCAGAGGGU 3' :|||*|||*|||||||:* miRNA: 3' UUGGGCGA-CGUCUCCU- 5'	no
lcr-miR-N148	rna-XM_019272688.2	gene-pigu	pigu	phosphatidylinositol glycan anchor biosynthesis class U	329	353	164	-29.24	miRNA: 3' uccuaCUUGGGC---GACGUCUCCu 5' :****|||||:|***|||||||||* target: 5' gcctgGAACCTGCGCCTGCAGAGGt 3'	333	354	-32.4	0.004987	target: 5' AACCUGCGCCUGCAGAGGU 3' ||||:||***||||||||* miRNA: 3' UUGGGCG---ACGUCUCCU 5'	no
lcr-miR-N148	rna-XM_027278247.1	gene-LOC104930405	LOC104930405	protocadherin gamma-C5, transcript variant X13	840	861	165	-30.43	miRNA: 3' ucCUACUUGGGCGA-CGUCUCCu 5' **||*|:|||*|||*|||||||: target: 5' caGA-GGACCGGCTGGCAGAGGg 3'	843	864	-33.2	0.005265	target: 5' GACCGGCUGGCAGAGGGU 3' :|||*|||*|||||||:* miRNA: 3' UUGGGCGA-CGUCUCCU- 5'	no
lcr-miR-N148	rna-XM_027281527.1	gene-ctxn2	ctxn2	cortexin 2, transcript variant X1	1100	1122	162	-27.81	miRNA: 3' uccuacuUGGGC-GACGUCUCCu 5' *******|||:|*|||||||||| target: 5' tctcactACCTGCCTGCAGAGGa 3'	1089	1110	-34.4	0.001483	target: 5' AAACUCUCACUACCUGCCUGCAGAGGAA 3' *|*********|||:|*||||||||||* miRNA: 3' CU---------UGGGC-GACGUCUCCU- 5'	no
lcr-miR-N148	rna-XM_019262296.2	gene-stk11	stk11	serine/threonine kinase 11, transcript variant X2	556	577	167	-26.67	miRNA: 3' uccUACUUGGGCGACGUCUCCu 5' :**|||:::*|*|||||||||| target: 5' gtcATGGGTGCACTGCAGAGGa 3'	540	561	-31.4	0.004907	target: 5' UGAGUAUCGCGCAGGCGGAGGAA 3' |||**|:|*|||**||:|||||* miRNA: 3' ACU--UGG-GCGA-CGUCUCCU- 5'	no
lcr-miR-N148	rna-XM_027281977.1	gene-LOC104920570	LOC104920570	bromodomain-containing protein 8	305	325	162	-26.81	miRNA: 3' uccuacUUGGGCGACGUCUCCu 5' :|*|**||||:*|||||||||| target: 5' ggtactAACCT-CTGCAGAGGa 3'	303	324	-32.2	0.005545	target: 5' CUAACCU-CUGCAGAGGAG 3' **||||:*||||||||||* miRNA: 3' C-UUGGGCGACGUCUCCU- 5'	no
lcr-miR-N148	rna-XM_019263899.2	gene-LOC104930405	LOC104930405	protocadherin gamma-C5, transcript variant X13	840	861	165	-30.43	miRNA: 3' ucCUACUUGGGCGA-CGUCUCCu 5' **||*|:|||*|||*|||||||: target: 5' caGA-GGACCGGCTGGCAGAGGg 3'	843	864	-33.2	0.005265	target: 5' GACCGGCUGGCAGAGGGU 3' :|||*|||*|||||||:* miRNA: 3' UUGGGCGA-CGUCUCCU- 5'	no
lcr-miR-N148	rna-XM_027277281.1	gene-snx2	snx2	sorting nexin 2, transcript variant X2	2258	2279	162	-29.55	miRNA: 3' uccuacuuGGGCGACGUCUCCu 5' :*|**|**::|||||||||||| target: 5' gagcagttTTCGCTGCAGAGGa 3'	2255	2276	-33.6	0.004786	target: 5' AGCAGUUUUCGCUGCAGAGGAA 3' |:|*****:||||||||||||* miRNA: 3' UUG-----GGCGACGUCUCCU- 5'	no
lcr-miR-N148	rna-XM_010737821.3	gene-LOC104924474	LOC104924474	V-type proton ATPase subunit d 1	235	259	162	-26.76	miRNA: 3' uccUACUUGGGC---GACGUCUCCu 5' ***||||:||:|***|*|||||||* target: 5' cacATGAGCCTGATCCAGCAGAGGt 3'	224	245	-30.4	0.006311	target: 5' AGAAUCACAUGAGCCUGAUCCAGCAGAGGU 3' *********|||:||:|*|***|||||||* miRNA: 3' ---------ACUUGGGCGA---CGUCUCCU 5'	no
lcr-miR-N148	rna-XM_019255601.2	gene-LOC104940462	LOC104940462	genetic suppressor element 1, transcript variant X1	640	661	160	-22.46	miRNA: 3' ucCUACUUGGGCGACGUCUCCu 5' **|:|*||**:*|||||||||| target: 5' ctGGTAAAGGTTCTGCAGAGGa 3'	620	641	-31.6	0.006639	target: 5' AAGUUGUUUGUGUGCUGGUAAAGGUUCUGCAGAGGAU 3' |************:|:*|:********|||||||||* miRNA: 3' U------------UGGGCG--------ACGUCUCCU- 5'	no
lcr-miR-N148	rna-XM_010736089.3	gene-col11a1	col11a1	collagen type XI alpha 1 chain, transcript variant X2	250	271	170	-26.9	miRNA: 3' uccuACUUGGGCGACGUCUCCu 5' ****|||||*||:*|||||||| target: 5' cattTGAACGCGTGGCAGAGGa 3'	245	266	-35.9	0.000417	target: 5' AUUUGAACGCGUGGCAGAGGAG 3' ***|||||*||:*||||||||* miRNA: 3' ---ACUUGGGCGACGUCUCCU- 5'	no
lcr-miR-N148	rna-XM_010735838.3	gene-LOC104922886	LOC104922886	atrial natriuretic peptide receptor 2, transcript variant X1	95	116	164	-30.36	miRNA: 3' ucCUACUUGGGCGACGUCUCCu 5' **|:|||*::|**||||||||| target: 5' ttGGTGATTTCCGTGCAGAGGa 3'	411	432	-28.3	0.006029	target: 5' AUUUCCG-UGCAGAGGAA 3' |**:|||*|||||||||* miRNA: 3' UU-GGGCGACGUCUCCU- 5'	no
lcr-miR-N148	rna-XM_019275504.2	gene-ctxn2	ctxn2	cortexin 2, transcript variant X1	1100	1122	162	-27.81	miRNA: 3' uccuacuUGGGC-GACGUCUCCu 5' *******|||:|*|||||||||| target: 5' tctcactACCTGCCTGCAGAGGa 3'	1089	1110	-34.4	0.001483	target: 5' AAACUCUCACUACCUGCCUGCAGAGGAA 3' *|*********|||:|*||||||||||* miRNA: 3' CU---------UGGGC-GACGUCUCCU- 5'	no
lcr-miR-N148	rna-XM_019262547.2	gene-LOC104935257	LOC104935257	monocarboxylate transporter 4, transcript variant X4	1381	1402	160	-26.01	miRNA: 3' uccuacUUGGGCGACGUCUCCu 5' :**:**|:*::||||||||||| target: 5' gttgacAGATTGCTGCAGAGGa 3'	1372	1393	-38.2	0.000581	target: 5' GGGUUGACAGAUUGCUGCAGAGGAA 3' |:::*******::|||||||||||* miRNA: 3' CUUG-------GGCGACGUCUCCU- 5'	no
lcr-miR-N148	rna-XM_027283264.1	gene-LOC104935786	LOC104935786	ETS-related transcription factor Elf-1, transcript variant X3	1380	1403	161	-24.82	miRNA: 3' uccuACUU--GGGCGACGUCUCCu 5' :***||||**||:|:*|||||||: target: 5' gattTGAAAGCCTGTAGCAGAGGg 3'	1377	1398	-34.2	0.001594	target: 5' UGAAAGCCUGUAGCAGAGGGA 3' |||**:||:|:*|||||||:* miRNA: 3' ACU--UGGGCGACGUCUCCU- 5'	no
lcr-miR-N148	rna-XM_019274652.2	gene-pbx3	pbx3	PBX homeobox 3, transcript variant X6	54	75	160	-24.58	miRNA: 3' ucCUACUUGGGCGACGUCUCCu 5' *||*|||*||**|*|||||||| target: 5' tgGCTGACCCAACAGCAGAGGa 3'	30	51	-30	0.000953	target: 5' UGGACUCUUUUAAAAACCUGGCUGACCCAACAGCAGAGGAU 3' ||:||:|*************|||*********||||||||* miRNA: 3' ACUUGGG-------------CGA---------CGUCUCCU- 5'	no
lcr-miR-N148	rna-XM_019273905.2	gene-LOC104919939	LOC104919939	rap guanine nucleotide exchange factor 3, transcript variant X1	1746	1770	162	-29.27	miRNA: 3' ucCUACUUGGGC-GA--CGUCUCCu 5' :||||||||**|*||**|||||||: target: 5' ggGATGAACAGGACTAAGCAGAGGg 3'	1744	1765	-33.4	0.007126	target: 5' GAACAGGACUAAGCAGAGGGA 3' ||||**|*||**|||||||:* miRNA: 3' CUUGGGC-GA--CGUCUCCU- 5'	no
lcr-miR-N148	rna-XM_019276872.2	gene-LOC104938279	LOC104938279	scavenger receptor cysteine-rich type 1 protein M130, transcript variant X3	93	114	162	-23.63	miRNA: 3' uccuACUUGGGCGACGUCUCCu 5' ****||:|**|*|||||||||: target: 5' ctccTGGAGACACTGCAGAGGg 3'	97	118	-28.1	0.004585	target: 5' GACA--CUGCAGAGGGU 3' :||***|||||||||:* miRNA: 3' UUGGGCGACGUCUCCU- 5'	no
lcr-miR-N148	rna-XM_027285295.1	gene-LOC109136703	LOC109136703	neurabin-1, transcript variant X6	179	199	160	-26.37	miRNA: 3' uccuACUUGGGCGACGUCUCCu 5' ****||:|||:|**|||||||* target: 5' tcttTGGACCTG-AGCAGAGGt 3'	182	203	-29.8	0.007615	target: 5' GACCUGA-GCAGAGGU 3' :|||:|**|||||||* miRNA: 3' UUGGGCGACGUCUCCU 5'	no
lcr-miR-N148	rna-XM_010738334.3	gene-LOC104924859	LOC104924859	hypothetical protein	4946	4967	164	-31.98	miRNA: 3' ucCUACUUGGGCGACGUCUCCu 5' **|:|***:|:||||||||||| target: 5' caGGTTCTTCTGCTGCAGAGGa 3'	4942	4963	-34.9	0.008346	target: 5' CU-UCUGCUGCAGAGGAG 3' ***:|:|||||||||||* miRNA: 3' CUUGGGCGACGUCUCCU- 5'	no
lcr-miR-N148	rna-XM_027273063.1	gene-plcz1	plcz1	phospholipase C zeta 1, transcript variant X1	164	188	161	-26.83	miRNA: 3' uccuACUUGG---GCGACGUCUCCu 5' *|**||*||:***|||||||||||| target: 5' tgccTGCACTGTGCGCTGCAGAGGa 3'	167	188	-31.4	0.001525	target: 5' CACUGUGCGCUGCAGAGGAA 3' *||:***||||||||||||* miRNA: 3' UUGG---GCGACGUCUCCU- 5'	no
lcr-miR-N148	rna-XM_027278224.1	gene-LOC104930405	LOC104930405	protocadherin gamma-C5, transcript variant X13	840	861	165	-30.43	miRNA: 3' ucCUACUUGGGCGA-CGUCUCCu 5' **||*|:|||*|||*|||||||: target: 5' caGA-GGACCGGCTGGCAGAGGg 3'	843	864	-33.2	0.005265	target: 5' GACCGGCUGGCAGAGGGU 3' :|||*|||*|||||||:* miRNA: 3' UUGGGCGA-CGUCUCCU- 5'	no
lcr-miR-N148	rna-XM_010736819.3	gene-LOC104923568	LOC104923568	F-box only protein 11, transcript variant X4	173	195	163	-29.81	miRNA: 3' ucCUAC-UUGGGCGACGUCUCCu 5' :*|:||*||***||||||||||| target: 5' gaGGTGAAAGAGGCTGCAGAGGa 3'	173	194	-33.7	0.001909	target: 5' GAAAGAGGCUGCAGAGGAA 3' |||****|||||||||||* miRNA: 3' CUUGGG-CGACGUCUCCU- 5'	no
lcr-miR-N148	rna-XM_027290490.1	gene-slc39a3	slc39a3	solute carrier family 39 member 3, transcript variant X4	83	103	174	-31.81	miRNA: 3' ucCUACUUGGGCGACGUCUCCu 5' *|||*||||:|*|||||||||* target: 5' tgGACGAACTC-CTGCAGAGGt 3'	83	104	-34.7	2.5e-05	target: 5' AACUC-CUGCAGAGGU 3' |||:|*|||||||||* miRNA: 3' UUGGGCGACGUCUCCU 5'	no
lcr-miR-N148	rna-XM_019266514.2	gene-LOC104926141	LOC104926141	serine/threonine-protein kinase LATS1, transcript variant X3	370	390	160	-24.28	miRNA: 3' uccuACUUGGGCGACGUCUCCu 5' *|**||||**|*|||||||||| target: 5' tgccTGAAAAC-CTGCAGAGGa 3'	359	380	-31.6	0.005449	target: 5' UGCGCUGCCUGAAAACCUGCAGAGGAA 3' ||****:||:|*****||||||||||* miRNA: 3' ACU---UGGGC-----GACGUCUCCU- 5'	no
lcr-miR-N148	rna-XM_010757073.3	gene-LOC104940462	LOC104940462	genetic suppressor element 1, transcript variant X1	640	661	160	-22.46	miRNA: 3' ucCUACUUGGGCGACGUCUCCu 5' **|:|*||**:*|||||||||| target: 5' ctGGTAAAGGTTCTGCAGAGGa 3'	620	641	-31.6	0.006639	target: 5' AAGUUGUUUGUGUGCUGGUAAAGGUUCUGCAGAGGAU 3' |************:|:*|:********|||||||||* miRNA: 3' U------------UGGGCG--------ACGUCUCCU- 5'	no
lcr-miR-N148	rna-XM_019265246.2	gene-ror1	ror1	receptor tyrosine kinase like orphan receptor 1, transcript variant X1	1156	1177	164	-27.07	miRNA: 3' uccuacUUGGGCGACGUCUCCu 5' ***|**|:|:*||||||||||| target: 5' ttcaaaAGCTGGCTGCAGAGGa 3'	1160	1181	-32.5	0.009465	target: 5' AGCUGGCUGCAGAGGAC 3' |:|:*|||||||||||* miRNA: 3' UUGGGCGACGUCUCCU- 5'	no
lcr-miR-N148	rna-XM_019253034.2	gene-tfap2a	tfap2a	transcription factor AP-2 alpha, transcript variant X5	327	348	160	-26.01	miRNA: 3' ucCUACUUGGGCGACGUCUCCu 5' |*||**||***||||||||||| target: 5' aaGAGAAAAAAGCTGCAGAGGa 3'	330	351	-30.4	0.001848	target: 5' AAAAAAGCUGCAGAGGAA 3' ||****|||||||||||* miRNA: 3' UUGGG-CGACGUCUCCU- 5'	no
lcr-miR-N148	rna-XM_027286604.1	gene-pi4kb	pi4kb	phosphatidylinositol 4-kinase beta, transcript variant X1	2160	2180	164	-30.33	miRNA: 3' ucCU-ACUUGGGCGACGUCUCCu 5' *|||*||||||:|**|||||||: target: 5' cgGACTGAACCTG--GCAGAGGg 3'	2158	2179	-33.6	0.004343	target: 5' GAACCUG--GCAGAGGGU 3' |||||:|**|||||||:* miRNA: 3' CUUGGGCGACGUCUCCU- 5'	no
lcr-miR-N148	rna-XM_027278195.1	gene-LOC104930405	LOC104930405	protocadherin gamma-C5, transcript variant X13	840	861	165	-30.43	miRNA: 3' ucCUACUUGGGCGA-CGUCUCCu 5' **||*|:|||*|||*|||||||: target: 5' caGA-GGACCGGCTGGCAGAGGg 3'	843	864	-33.2	0.005265	target: 5' GACCGGCUGGCAGAGGGU 3' :|||*|||*|||||||:* miRNA: 3' UUGGGCGA-CGUCUCCU- 5'	no
lcr-miR-N148	rna-XM_019257477.2	gene-LOC104937550	LOC104937550	xin actin-binding repeat-containing protein 2, transcript variant X1	12	31	160	-24.39	miRNA: 3' uccUACUUGGGCGACGUCUCCu 5' :**:||||**|*|||||||||* target: 5' gctGTGAA--CACTGCAGAGGc 3'	14	35	-28.2	0.001934	target: 5' AACA--CUGCAGAGGC 3' |||***|||||||||* miRNA: 3' UUGGGCGACGUCUCCU 5'	no
lcr-miR-N148	rna-XM_019268024.2	gene-LOC104923568	LOC104923568	F-box only protein 11, transcript variant X4	173	195	163	-29.81	miRNA: 3' ucCUAC-UUGGGCGACGUCUCCu 5' :*|:||*||***||||||||||| target: 5' gaGGTGAAAGAGGCTGCAGAGGa 3'	173	194	-33.7	0.001909	target: 5' GAAAGAGGCUGCAGAGGAA 3' |||****|||||||||||* miRNA: 3' CUUGGG-CGACGUCUCCU- 5'	no
lcr-miR-N148	rna-XM_027291558.1	gene-LOC104937550	LOC104937550	xin actin-binding repeat-containing protein 2, transcript variant X1	12	31	160	-24.39	miRNA: 3' uccUACUUGGGCGACGUCUCCu 5' :**:||||**|*|||||||||* target: 5' gctGTGAA--CACTGCAGAGGc 3'	14	35	-28.2	0.001934	target: 5' AACA--CUGCAGAGGC 3' |||***|||||||||* miRNA: 3' UUGGGCGACGUCUCCU 5'	no
lcr-miR-N148	rna-XM_019264786.2	gene-dnmbp	dnmbp	dynamin binding protein, transcript variant X1	595	616	162	-20.55	miRNA: 3' uccuACUUGGGCGACGUCUCCu 5' :***||||*:**|||||||||* target: 5' gtttTGAAGTGTCTGCAGAGGc 3'	570	591	-29.3	0.008713	target: 5' GAUUAUCUACUGGUUGCUAGUUUUGAAGUGUCUGCAGAGGC 3' ||*************:|:**********:|*|||||||||* miRNA: 3' CU-------------UGG----------GC-GACGUCUCCU 5'	no
lcr-miR-N148	rna-XM_027274627.1	gene-mta1	mta1	metastasis associated 1, transcript variant X5	642	663	166	-28.16	miRNA: 3' uccuacuuGGGCGACGUCUCCu 5' :****|**|:|||||||||||* target: 5' gctcagtcCTCGCTGCAGAGGc 3'	639	660	-32.2	0.004856	target: 5' CAGUCCUCGCUGCAGAGGC 3' **|**|:|||||||||||* miRNA: 3' --CUUGGGCGACGUCUCCU 5'	no
lcr-miR-N148	rna-XM_027285315.1	gene-stk11	stk11	serine/threonine kinase 11, transcript variant X2	556	577	167	-26.67	miRNA: 3' uccUACUUGGGCGACGUCUCCu 5' :**|||:::*|*|||||||||| target: 5' gtcATGGGTGCACTGCAGAGGa 3'	540	561	-31.4	0.004907	target: 5' UGAGUAUCGCGCAGGCGGAGGAA 3' |||**|:|*|||**||:|||||* miRNA: 3' ACU--UGG-GCGA-CGUCUCCU- 5'	no
lcr-miR-N148	rna-XM_027278188.1	gene-LOC104930405	LOC104930405	protocadherin gamma-C5, transcript variant X13	840	861	165	-30.43	miRNA: 3' ucCUACUUGGGCGA-CGUCUCCu 5' **||*|:|||*|||*|||||||: target: 5' caGA-GGACCGGCTGGCAGAGGg 3'	843	864	-33.2	0.005265	target: 5' GACCGGCUGGCAGAGGGU 3' :|||*|||*|||||||:* miRNA: 3' UUGGGCGA-CGUCUCCU- 5'	no
lcr-miR-N148	rna-XM_010734805.3	gene-cyhr1	cyhr1	cysteine and histidine rich 1	2008	2030	163	-33.19	miRNA: 3' ucCUACUUGGG-CGACGUCUCCu 5' *||:|||||::*|**|||||||: target: 5' tgGGTGAACTTGGAGGCAGAGGg 3'	399	420	-33.6	0.004402	target: 5' AACUUGGAGGCAGAGGGG 3' |||::|***|||||||:* miRNA: 3' UUGGGCGA-CGUCUCCU- 5'	no
lcr-miR-N148	rna-XM_010743839.3	gene-soat1	soat1	sterol O-acyltransferase 1	5	25	160	-26.46	miRNA: 3' uccuACUUGGGCGACGUCUCCu 5' *|**||:|*|:*|||||||||| target: 5' tgttTGGA-CTACTGCAGAGGa 3'	8	29	-31.1	0.009286	target: 5' GACUA-CUGCAGAGGAC 3' :||:**||||||||||* miRNA: 3' UUGGGCGACGUCUCCU- 5'	no
lcr-miR-N148	rna-XM_019265964.2	gene-LOC104939391	LOC104939391	thyroid hormone receptor-associated protein 3-like, transcript variant X1	278	299	167	-26.88	miRNA: 3' uccUACUUGGGCGACGUCUCCu 5' |**||||*||:|**|||||||| target: 5' aacATGATCCTGAAGCAGAGGa 3'	270	291	-31.6	0.004954	target: 5' GCAACAUGAUCCUGAAGCAGAGGAG 3' *****||||*||:|**||||||||* miRNA: 3' -----UACUUGGGCGACGUCUCCU- 5'	no
lcr-miR-N148	rna-XM_019268772.2	gene-gorab	gorab	golgin, RAB6 interacting	958	977	165	-29.63	miRNA: 3' ucCUACUUGGGCGACGUCUCCu 5' *||||||**:|*|||||||||* target: 5' tgGATGA--TCTCTGCAGAGGt 3'	958	979	-31.7	0.004597	target: 5' AGCAGACUGUACCUGACACGACUGUCGGGCUGCAGAGGGA 3' *******||*|||:**************||||||||||:* miRNA: 3' -------ACUUGGG--------------CGACGUCUCCU- 5'	no
lcr-miR-N148	rna-XM_019259924.2	gene-golm1	golm1	golgi membrane protein 1, transcript variant X2	1197	1218	161	-28.62	miRNA: 3' uccuaCUUGGGCGACGUCUCCu 5' :|*:*|:::|:||*|||||||* target: 5' ggaggGGGTCTGCAGCAGAGGc 3'	1195	1216	-33.4	0.007375	target: 5' GGGUCUGCAGCAGAGGC 3' |:::|:||*|||||||* miRNA: 3' CUUGGGCGACGUCUCCU 5'	no
lcr-miR-N148	rna-XM_027280757.1	gene-sptbn4	sptbn4	spectrin beta, non-erythrocytic 4, transcript variant X1	2016	2037	172	-26.83	miRNA: 3' ucCUACUUGGGCGACGUCUCCu 5' :*||*|*:|||*|||||||||* target: 5' gaGAAGCGCCCACTGCAGAGGc 3'	2005	2026	-34.2	0.006184	target: 5' UUUGAGAAGCGCCCACUGCAGAGGC 3' **|||*****:|||*|||||||||* miRNA: 3' --ACU-----UGGGCGACGUCUCCU 5'	no
lcr-miR-N148	rna-XM_027283050.1	gene-LOC104921153	LOC104921153	axin-1, transcript variant X1	314	335	160	-29.01	miRNA: 3' ucCUACUUGGGCGACGUCUCCu 5' **||||||*|||**||:||||| target: 5' caGATGAAACCGGAGCGGAGGa 3'	315	336	-35	0.00349	target: 5' AAACCGGAGCGGAGGAA 3' ||*|||**||:|||||* miRNA: 3' UUGGGCGACGUCUCCU- 5'	no
lcr-miR-N148	rna-XM_019257478.2	gene-LOC104937550	LOC104937550	xin actin-binding repeat-containing protein 2, transcript variant X1	12	31	160	-24.39	miRNA: 3' uccUACUUGGGCGACGUCUCCu 5' :**:||||**|*|||||||||* target: 5' gctGTGAA--CACTGCAGAGGc 3'	14	35	-28.2	0.001934	target: 5' AACA--CUGCAGAGGC 3' |||***|||||||||* miRNA: 3' UUGGGCGACGUCUCCU 5'	no
lcr-miR-N148	rna-XM_027288405.1	gene-tpd52l2	tpd52l2	TPD52 like 2, transcript variant X1	2413	2434	168	-25.07	miRNA: 3' uccuacUUGGGCGACGUCUCCu 5' :*****|:||*||||||||||* target: 5' gctcacAGCCAGCTGCAGAGGc 3'	2401	2422	-33	0.006319	target: 5' AGCCCGCUCACAGCCAGCUGCAGAGGC 3' |:|||||***********||||||||* miRNA: 3' UUGGGCG-----------ACGUCUCCU 5'	no
lcr-miR-N148	rna-XM_027278294.1	gene-LOC104930405	LOC104930405	protocadherin gamma-C5, transcript variant X13	840	861	165	-30.43	miRNA: 3' ucCUACUUGGGCGA-CGUCUCCu 5' **||*|:|||*|||*|||||||: target: 5' caGA-GGACCGGCTGGCAGAGGg 3'	843	864	-33.2	0.005265	target: 5' GACCGGCUGGCAGAGGGU 3' :|||*|||*|||||||:* miRNA: 3' UUGGGCGA-CGUCUCCU- 5'	no
lcr-miR-N148	rna-XM_019270267.2	gene-LOC104918489	LOC104918489	zinc finger protein GLIS1, transcript variant X2	1687	1708	172	-27.49	miRNA: 3' uccuacUUGGGCGACGUCUCCu 5' ***:**|||||||*|||||||* target: 5' tttgcaAACCCGCAGCAGAGGc 3'	1683	1704	-31.9	0.00682	target: 5' GCAAACCCGCAGCAGAGGC 3' |**|||||||*|||||||* miRNA: 3' C--UUGGGCGACGUCUCCU 5'	no
lcr-miR-N148	rna-XM_019254089.2	gene-LOC109137019	LOC109137019	potassium channel subfamily K member 16-like	1315	1337	171	-29.11	miRNA: 3' ucCUACUUGGG-CGACGUCUCCu 5' **|*||*:|||*||||||||||* target: 5' ttGCTGTGCCCAGCTGCAGAGGt 3'	1317	1338	-33.1	0.002623	target: 5' UGCCCAGCUGCAGAGGU 3' *:|||*||||||||||* miRNA: 3' UUGGG-CGACGUCUCCU 5'	no
lcr-miR-N148	rna-XM_010751525.3	gene-LOC104935658	LOC104935658	cytochrome b5 reductase 4	331	353	161	-24.86	miRNA: 3' uccuACUU-GGGCGACGUCUCCu 5' :***||||*:*:|:||||||||| target: 5' gcttTGAAGTGTGTTGCAGAGGa 3'	317	338	-33.8	0.000228	target: 5' UCCCAUGAGCUUUGAAGUGUGUUGCAGAGGAU 3' *****|||:|:********:|:|||||||||* miRNA: 3' -----ACUUGG--------GCGACGUCUCCU- 5'	no
lcr-miR-N148	rna-XM_019262548.2	gene-LOC104935257	LOC104935257	monocarboxylate transporter 4, transcript variant X4	1381	1402	160	-26.01	miRNA: 3' uccuacUUGGGCGACGUCUCCu 5' :**:**|:*::||||||||||| target: 5' gttgacAGATTGCTGCAGAGGa 3'	1372	1393	-38.2	0.000581	target: 5' GGGUUGACAGAUUGCUGCAGAGGAA 3' |:::*******::|||||||||||* miRNA: 3' CUUG-------GGCGACGUCUCCU- 5'	no
lcr-miR-N148	rna-XM_010745186.3	gene-LOC104930405	LOC104930405	protocadherin gamma-C5, transcript variant X13	840	861	165	-30.43	miRNA: 3' ucCUACUUGGGCGA-CGUCUCCu 5' **||*|:|||*|||*|||||||: target: 5' caGA-GGACCGGCTGGCAGAGGg 3'	843	864	-33.2	0.005265	target: 5' GACCGGCUGGCAGAGGGU 3' :|||*|||*|||||||:* miRNA: 3' UUGGGCGA-CGUCUCCU- 5'	no
lcr-miR-N148	rna-XM_019274651.2	gene-pbx3	pbx3	PBX homeobox 3, transcript variant X6	54	75	160	-24.58	miRNA: 3' ucCUACUUGGGCGACGUCUCCu 5' *||*|||*||**|*|||||||| target: 5' tgGCTGACCCAACAGCAGAGGa 3'	30	51	-30	0.000953	target: 5' UGGACUCUUUUAAAAACCUGGCUGACCCAACAGCAGAGGAU 3' ||:||:|*************|||*********||||||||* miRNA: 3' ACUUGGG-------------CGA---------CGUCUCCU- 5'	no
lcr-miR-N148	rna-XM_027278207.1	gene-LOC104930405	LOC104930405	protocadherin gamma-C5, transcript variant X13	840	861	165	-30.43	miRNA: 3' ucCUACUUGGGCGA-CGUCUCCu 5' **||*|:|||*|||*|||||||: target: 5' caGA-GGACCGGCTGGCAGAGGg 3'	843	864	-33.2	0.005265	target: 5' GACCGGCUGGCAGAGGGU 3' :|||*|||*|||||||:* miRNA: 3' UUGGGCGA-CGUCUCCU- 5'	no
lcr-miR-N148	rna-XM_027285296.1	gene-LOC109136703	LOC109136703	neurabin-1, transcript variant X6	179	199	160	-26.37	miRNA: 3' uccuACUUGGGCGACGUCUCCu 5' ****||:|||:|**|||||||* target: 5' tcttTGGACCTG-AGCAGAGGt 3'	182	203	-29.8	0.007615	target: 5' GACCUGA-GCAGAGGU 3' :|||:|**|||||||* miRNA: 3' UUGGGCGACGUCUCCU 5'	no
lcr-miR-N148	rna-XM_027285298.1	gene-LOC109136703	LOC109136703	neurabin-1, transcript variant X6	179	199	160	-26.37	miRNA: 3' uccuACUUGGGCGACGUCUCCu 5' ****||:|||:|**|||||||* target: 5' tcttTGGACCTG-AGCAGAGGt 3'	182	203	-29.8	0.007615	target: 5' GACCUGA-GCAGAGGU 3' :|||:|**|||||||* miRNA: 3' UUGGGCGACGUCUCCU 5'	no
lcr-miR-N148	rna-XM_027289652.1	gene-LOC104938095	LOC104938095	mitofusin-1, transcript variant X1	455	473	163	-24.55	miRNA: 3' uccUACUUGGGCGACGUCUCCu 5' ***|||||***||||||||||| target: 5' ttcATGAA---GCTGCAGAGGa 3'	450	471	-33.5	0.000417	target: 5' UCAUGAAGCUGCAGAGGAA 3' **|:***|||||||||||* miRNA: 3' CUUGGG-CGACGUCUCCU- 5'	no
lcr-miR-N148	rna-XM_027272194.1	gene-LOC113744060	LOC113744060	glucagon family neuropeptides-like, transcript variant X2	2218	2240	170	-30.09	miRNA: 3' uccUACUUGGGCG-ACGUCUCCu 5' *|*:|||:|*|||*||||||||* target: 5' tgtGTGAGCGCGCATGCAGAGGt 3'	2218	2239	-33	0.006008	target: 5' AGCGCGCAUGCAGAGGU 3' |:|*|||*||||||||* miRNA: 3' UUGGGCG-ACGUCUCCU 5'	no
lcr-miR-N148	rna-XM_019265697.2	gene-LOC104936244	LOC104936244	type I phosphatidylinositol 4,5-bisphosphate 4-phosphatase-B	491	510	165	-29.47	miRNA: 3' ucCUACUUGGGCGACGUCUCCu 5' ||||||||:*||**|||||||| target: 5' agGATGAATACG--GCAGAGGa 3'	490	511	-33.2	0.004438	target: 5' GAAUACG--GCAGAGGAG 3' |||:*||**||||||||* miRNA: 3' CUUGGGCGACGUCUCCU- 5'	no
lcr-miR-N148	rna-XM_019274076.2	gene-pi4kb	pi4kb	phosphatidylinositol 4-kinase beta, transcript variant X1	2160	2180	164	-30.33	miRNA: 3' ucCU-ACUUGGGCGACGUCUCCu 5' *|||*||||||:|**|||||||: target: 5' cgGACTGAACCTG--GCAGAGGg 3'	2158	2179	-33.6	0.004343	target: 5' GAACCUG--GCAGAGGGU 3' |||||:|**|||||||:* miRNA: 3' CUUGGGCGACGUCUCCU- 5'	no
lcr-miR-N148	rna-XM_019263955.2	gene-LOC104925377	LOC104925377	transcription factor AP-4, transcript variant X2	209	230	161	-30.65	miRNA: 3' ucCUACUUGGGCG-ACGUCUCCu 5' ||||||*::|*||*||||||||| target: 5' agGATG-GTCAGCGTGCAGAGGa 3'	208	229	-33.7	0.002484	target: 5' GGUCA-GCGUGCAGAGGAG 3' |:*|**||*|||||||||* miRNA: 3' CUUGGGCG-ACGUCUCCU- 5'	no
lcr-miR-N148	rna-XM_027277278.1	gene-snx2	snx2	sorting nexin 2, transcript variant X2	2258	2279	162	-29.55	miRNA: 3' uccuacuuGGGCGACGUCUCCu 5' :*|**|**::|||||||||||| target: 5' gagcagttTTCGCTGCAGAGGa 3'	2255	2276	-33.6	0.004786	target: 5' AGCAGUUUUCGCUGCAGAGGAA 3' |:|*****:||||||||||||* miRNA: 3' UUG-----GGCGACGUCUCCU- 5'	no
lcr-miR-N148	rna-XM_027278269.1	gene-LOC104930405	LOC104930405	protocadherin gamma-C5, transcript variant X13	840	861	165	-30.43	miRNA: 3' ucCUACUUGGGCGA-CGUCUCCu 5' **||*|:|||*|||*|||||||: target: 5' caGA-GGACCGGCTGGCAGAGGg 3'	843	864	-33.2	0.005265	target: 5' GACCGGCUGGCAGAGGGU 3' :|||*|||*|||||||:* miRNA: 3' UUGGGCGA-CGUCUCCU- 5'	no
lcr-miR-N148	rna-XM_019271834.2	gene-camsap1	camsap1	calmodulin regulated spectrin associated protein 1, transcript variant X1	106	129	163	-27.32	miRNA: 3' uccuacUUGGGCGA--CGUCUCCu 5' :**:**||||:|||**|||||||* target: 5' gctggaAACCTGCTCGGCAGAGGc 3'	102	123	-33.1	0.004386	target: 5' UGGAAACCUGCUCGGCAGAGGC 3' ||:**|||:|||**|||||||* miRNA: 3' ACU--UGGGCGA--CGUCUCCU 5'	no
lcr-miR-N148	rna-XM_027278286.1	gene-LOC104930405	LOC104930405	protocadherin gamma-C5, transcript variant X13	840	861	165	-30.43	miRNA: 3' ucCUACUUGGGCGA-CGUCUCCu 5' **||*|:|||*|||*|||||||: target: 5' caGA-GGACCGGCTGGCAGAGGg 3'	843	864	-33.2	0.005265	target: 5' GACCGGCUGGCAGAGGGU 3' :|||*|||*|||||||:* miRNA: 3' UUGGGCGA-CGUCUCCU- 5'	no
lcr-miR-N148	rna-XM_027290489.1	gene-slc39a3	slc39a3	solute carrier family 39 member 3, transcript variant X4	83	103	174	-31.81	miRNA: 3' ucCUACUUGGGCGACGUCUCCu 5' *|||*||||:|*|||||||||* target: 5' tgGACGAACTC-CTGCAGAGGt 3'	83	104	-34.7	2.5e-05	target: 5' AACUC-CUGCAGAGGU 3' |||:|*|||||||||* miRNA: 3' UUGGGCGACGUCUCCU 5'	no
lcr-miR-N148	rna-XM_010741877.3	gene-LOC104927735	LOC104927735	PRA1 family protein 3	18	40	163	-27.48	miRNA: 3' ucCUACUUGGGCG-ACGUCUCCu 5' ||||||||***|:*||||||||* target: 5' agGATGAAGAAGTGTGCAGAGGt 3'	17	38	-30.6	0.001509	target: 5' GAAGAAGUGUGCAGAGGU 3' |||***|:*||||||||* miRNA: 3' CUUGGGCG-ACGUCUCCU 5'	no
lcr-miR-N148	rna-XM_027277445.1	gene-golm1	golm1	golgi membrane protein 1, transcript variant X2	1197	1218	161	-28.62	miRNA: 3' uccuaCUUGGGCGACGUCUCCu 5' :|*:*|:::|:||*|||||||* target: 5' ggaggGGGTCTGCAGCAGAGGc 3'	1195	1216	-33.4	0.007375	target: 5' GGGUCUGCAGCAGAGGC 3' |:::|:||*|||||||* miRNA: 3' CUUGGGCGACGUCUCCU 5'	no
lcr-miR-N148	rna-XM_027278216.1	gene-LOC104930405	LOC104930405	protocadherin gamma-C5, transcript variant X13	840	861	165	-30.43	miRNA: 3' ucCUACUUGGGCGA-CGUCUCCu 5' **||*|:|||*|||*|||||||: target: 5' caGA-GGACCGGCTGGCAGAGGg 3'	843	864	-33.2	0.005265	target: 5' GACCGGCUGGCAGAGGGU 3' :|||*|||*|||||||:* miRNA: 3' UUGGGCGA-CGUCUCCU- 5'	no
lcr-miR-N148	rna-XM_027280754.1	gene-sptbn4	sptbn4	spectrin beta, non-erythrocytic 4, transcript variant X1	2016	2037	172	-26.83	miRNA: 3' ucCUACUUGGGCGACGUCUCCu 5' :*||*|*:|||*|||||||||* target: 5' gaGAAGCGCCCACTGCAGAGGc 3'	2005	2026	-34.2	0.006184	target: 5' UUUGAGAAGCGCCCACUGCAGAGGC 3' **|||*****:|||*|||||||||* miRNA: 3' --ACU-----UGGGCGACGUCUCCU 5'	no
lcr-miR-N148	rna-XM_027278201.1	gene-LOC104930405	LOC104930405	protocadherin gamma-C5, transcript variant X13	840	861	165	-30.43	miRNA: 3' ucCUACUUGGGCGA-CGUCUCCu 5' **||*|:|||*|||*|||||||: target: 5' caGA-GGACCGGCTGGCAGAGGg 3'	843	864	-33.2	0.005265	target: 5' GACCGGCUGGCAGAGGGU 3' :|||*|||*|||||||:* miRNA: 3' UUGGGCGA-CGUCUCCU- 5'	no
lcr-miR-N148	rna-XM_027278200.1	gene-LOC104930405	LOC104930405	protocadherin gamma-C5, transcript variant X13	840	861	165	-30.43	miRNA: 3' ucCUACUUGGGCGA-CGUCUCCu 5' **||*|:|||*|||*|||||||: target: 5' caGA-GGACCGGCTGGCAGAGGg 3'	843	864	-33.2	0.005265	target: 5' GACCGGCUGGCAGAGGGU 3' :|||*|||*|||||||:* miRNA: 3' UUGGGCGA-CGUCUCCU- 5'	no
lcr-miR-N148	rna-XM_019264784.2	gene-dnmbp	dnmbp	dynamin binding protein, transcript variant X1	595	616	162	-20.55	miRNA: 3' uccuACUUGGGCGACGUCUCCu 5' :***||||*:**|||||||||* target: 5' gtttTGAAGTGTCTGCAGAGGc 3'	570	591	-29.3	0.008713	target: 5' GAUUAUCUACUGGUUGCUAGUUUUGAAGUGUCUGCAGAGGC 3' ||*************:|:**********:|*|||||||||* miRNA: 3' CU-------------UGG----------GC-GACGUCUCCU 5'	no
lcr-miR-N148	rna-XM_010733304.3	gene-atp1b3	atp1b3	ATPase Na+/K+ transporting subunit beta 3	21	42	164	-28.72	miRNA: 3' uccuacUUGGGCGACGUCUCCu 5' |**:**|||||**||||||||* target: 5' aaaggaAACCCAATGCAGAGGc 3'	22	43	-32.4	0.003722	target: 5' -AACCCAAUGCAGAGGC 3' *|||||**||||||||* miRNA: 3' CUUGGGCGACGUCUCCU 5'	no
lcr-miR-N148	rna-XM_019260011.2	gene-LOC104918135	LOC104918135	transmembrane protein 116, transcript variant X2	395	415	166	-24.84	miRNA: 3' ucCUACUUGGGCGACGUCUCCu 5' :*||||*||*:||*|||||||: target: 5' gtGATG-ACATGCAGCAGAGGg 3'	390	411	-29.7	0.005477	target: 5' UGAUGACAUGCAGCAGAGGGC 3' |||**||*:||*|||||||:* miRNA: 3' ACU--UGGGCGACGUCUCCU- 5'	no
lcr-miR-N148	rna-XM_019279012.2	gene-LOC109143071	LOC109143071	phospholipase B1, membrane-associated	145	166	168	-23.9	miRNA: 3' ucCUACUUGGGCGACGUCUCCu 5' **||*|||*::*|||||||||* target: 5' caGAGGAAATTACTGCAGAGGt 3'	59	80	-34.7	0.000198	target: 5' AGAGUGGAUCACCUCCUGCAGAGGAG 3' *||*******|||:*||||||||||* miRNA: 3' -CU-------UGGGCGACGUCUCCU- 5'	no
lcr-miR-N148	rna-XM_027285300.1	gene-LOC109136703	LOC109136703	neurabin-1, transcript variant X6	179	199	160	-26.37	miRNA: 3' uccuACUUGGGCGACGUCUCCu 5' ****||:|||:|**|||||||* target: 5' tcttTGGACCTG-AGCAGAGGt 3'	182	203	-29.8	0.007615	target: 5' GACCUGA-GCAGAGGU 3' :|||:|**|||||||* miRNA: 3' UUGGGCGACGUCUCCU 5'	no
lcr-miR-N148	rna-XM_027278230.1	gene-LOC104930405	LOC104930405	protocadherin gamma-C5, transcript variant X13	840	861	165	-30.43	miRNA: 3' ucCUACUUGGGCGA-CGUCUCCu 5' **||*|:|||*|||*|||||||: target: 5' caGA-GGACCGGCTGGCAGAGGg 3'	843	864	-33.2	0.005265	target: 5' GACCGGCUGGCAGAGGGU 3' :|||*|||*|||||||:* miRNA: 3' UUGGGCGA-CGUCUCCU- 5'	no
lcr-miR-N148	rna-XM_010751678.3	gene-LOC104935786	LOC104935786	ETS-related transcription factor Elf-1, transcript variant X3	1380	1403	161	-24.82	miRNA: 3' uccuACUU--GGGCGACGUCUCCu 5' :***||||**||:|:*|||||||: target: 5' gattTGAAAGCCTGTAGCAGAGGg 3'	1377	1398	-34.2	0.001594	target: 5' UGAAAGCCUGUAGCAGAGGGA 3' |||**:||:|:*|||||||:* miRNA: 3' ACU--UGGGCGACGUCUCCU- 5'	no
lcr-miR-N148	rna-XM_010744214.3	gene-LOC104929611	LOC104929611	pyroglutamylated RF-amide peptide receptor	1317	1338	162	-27.14	miRNA: 3' uccuacuuGGGCGACGUCUCCu 5' **|*|***:|:||||||||||: target: 5' tagttaccTCTGCTGCAGAGGg 3'	1323	1344	-30.8	0.008268	target: 5' -CUCUGCUGCAGAGGGU 3' **:|:||||||||||:* miRNA: 3' UUGGGCGACGUCUCCU- 5'	no
lcr-miR-N148	rna-XM_027283049.1	gene-LOC104921153	LOC104921153	axin-1, transcript variant X1	314	335	160	-29.01	miRNA: 3' ucCUACUUGGGCGACGUCUCCu 5' **||||||*|||**||:||||| target: 5' caGATGAAACCGGAGCGGAGGa 3'	315	336	-35	0.00349	target: 5' AAACCGGAGCGGAGGAA 3' ||*|||**||:|||||* miRNA: 3' UUGGGCGACGUCUCCU- 5'	no
lcr-miR-N148	rna-XM_010734059.3	gene-hspa9	hspa9	heat shock protein family A (Hsp70) member 9	1052	1073	164	-32.79	miRNA: 3' ucCUACUUGGGCGACGUCUCCu 5' :*|:||::||*|**|||||||: target: 5' gaGGTGGGCCGGAGGCAGAGGg 3'	1049	1070	-32.7	0.002248	target: 5' UGGGCCGGAGGCAGAGGGC 3' ||::||*|**|||||||:* miRNA: 3' ACUUGGGCGACGUCUCCU- 5'	no
lcr-miR-N148	rna-XM_019255446.2	gene-rps6kb1	rps6kb1	ribosomal protein S6 kinase B1, transcript variant X1	453	475	167	-32.5	miRNA: 3' ucCUACUUGGG-CGACGUCUCCu 5' *||:*|||::|*|:||||||||: target: 5' tgGGAGAATTCGGTTGCAGAGGg 3'	453	474	-34.5	0.002873	target: 5' GAAUUCGGUUGCAGAGGGG 3' |||::|*|:||||||||:* miRNA: 3' CUUGGG-CGACGUCUCCU- 5'	no
lcr-miR-N148	rna-XM_027290780.1	gene-gpr45	gpr45	G protein-coupled receptor 45, transcript variant X2	201	224	163	-26.66	miRNA: 3' ucCUACUUGGG--CGACGUCUCCu 5' **||**|||||***|||||||||| target: 5' ttGAACAACCCCATCTGCAGAGGa 3'	201	222	-31.4	0.005166	target: 5' AACAACCCCAUCUGCAGAGGAA 3' |***||||***||||||||||* miRNA: 3' U---UGGGC--GACGUCUCCU- 5'	no
lcr-miR-N148	rna-XM_010736741.3	gene-LOC104923568	LOC104923568	F-box only protein 11, transcript variant X4	173	195	163	-29.81	miRNA: 3' ucCUAC-UUGGGCGACGUCUCCu 5' :*|:||*||***||||||||||| target: 5' gaGGTGAAAGAGGCTGCAGAGGa 3'	173	194	-33.7	0.001909	target: 5' GAAAGAGGCUGCAGAGGAA 3' |||****|||||||||||* miRNA: 3' CUUGGG-CGACGUCUCCU- 5'	no
lcr-miR-N148	rna-XM_010730864.3	gene-prr7	prr7	proline rich 7, synaptic	183	204	168	-29.3	miRNA: 3' ucCUACUUGGGCGACGUCUCCu 5' |||:|*||**:||||||||||* target: 5' agGGTTAAAGTGCTGCAGAGGc 3'	182	203	-31.9	0.007046	target: 5' UAAAGUGCUGCAGAGGC 3' *||**:||||||||||* miRNA: 3' CUUGGGCGACGUCUCCU 5'	no
lcr-miR-N148	rna-XM_010756871.3	gene-LOC104940300	LOC104940300	brain-specific angiogenesis inhibitor 1-associated protein 2, transcript variant X2	1769	1790	164	-30.54	miRNA: 3' ucCUACUUGGGCGACGUCUCCu 5' :*|:*||:|::|:*|||||||* target: 5' gaGGAGAGCTTGTAGCAGAGGt 3'	1768	1789	-33.6	0.003603	target: 5' GAGCUUGUAGCAGAGGU 3' ||:|::|:*|||||||* miRNA: 3' CUUGGGCGACGUCUCCU 5'	no
lcr-miR-N148	rna-XM_010745189.3	gene-LOC104930405	LOC104930405	protocadherin gamma-C5, transcript variant X13	840	861	165	-30.43	miRNA: 3' ucCUACUUGGGCGA-CGUCUCCu 5' **||*|:|||*|||*|||||||: target: 5' caGA-GGACCGGCTGGCAGAGGg 3'	843	864	-33.2	0.005265	target: 5' GACCGGCUGGCAGAGGGU 3' :|||*|||*|||||||:* miRNA: 3' UUGGGCGA-CGUCUCCU- 5'	no
lcr-miR-N148	rna-XM_010745985.3	gene-LOC104931065	LOC104931065	spliceosome RNA helicase DDX39B, transcript variant X1	162	183	162	-27.14	miRNA: 3' uccuacuuGGGCGACGUCUCCu 5' :****|**|||*|||||||||| target: 5' gtacagctCCCTCTGCAGAGGa 3'	166	187	-30.6	0.000938	target: 5' CUCCCUCUGCAGAGGAG 3' **|||*||||||||||* miRNA: 3' UUGGGCGACGUCUCCU- 5'	no
lcr-miR-N148	rna-XM_019265962.2	gene-LOC104939391	LOC104939391	thyroid hormone receptor-associated protein 3-like, transcript variant X1	278	299	167	-26.88	miRNA: 3' uccUACUUGGGCGACGUCUCCu 5' |**||||*||:|**|||||||| target: 5' aacATGATCCTGAAGCAGAGGa 3'	270	291	-31.6	0.004954	target: 5' GCAACAUGAUCCUGAAGCAGAGGAG 3' *****||||*||:|**||||||||* miRNA: 3' -----UACUUGGGCGACGUCUCCU- 5'	no
lcr-miR-N148	rna-XM_027286605.1	gene-pi4kb	pi4kb	phosphatidylinositol 4-kinase beta, transcript variant X1	2160	2180	164	-30.33	miRNA: 3' ucCU-ACUUGGGCGACGUCUCCu 5' *|||*||||||:|**|||||||: target: 5' cgGACTGAACCTG--GCAGAGGg 3'	2158	2179	-33.6	0.004343	target: 5' GAACCUG--GCAGAGGGU 3' |||||:|**|||||||:* miRNA: 3' CUUGGGCGACGUCUCCU- 5'	no
lcr-miR-N148	rna-XM_027278302.1	gene-LOC104930405	LOC104930405	protocadherin gamma-C5, transcript variant X13	840	861	165	-30.43	miRNA: 3' ucCUACUUGGGCGA-CGUCUCCu 5' **||*|:|||*|||*|||||||: target: 5' caGA-GGACCGGCTGGCAGAGGg 3'	843	864	-33.2	0.005265	target: 5' GACCGGCUGGCAGAGGGU 3' :|||*|||*|||||||:* miRNA: 3' UUGGGCGA-CGUCUCCU- 5'	no
lcr-miR-N148	rna-XM_027282463.1	gene-ybey	ybey	ybeY metalloendoribonuclease	831	854	163	-28.16	miRNA: 3' uccuaCUUGG-GCGA-CGUCUCCu 5' **|**|||||*||:|*|||||||* target: 5' tagtgGAACCGCGTTAGCAGAGGt 3'	824	845	-32.5	0.002571	target: 5' CUAGUGGAACCGCGUUAGCAGAGGU 3' ******|||||*||:|*|||||||* miRNA: 3' ------CUUGG-GCGA-CGUCUCCU 5'	no
lcr-miR-N148	rna-XM_027285848.1	gene-LOC104918807	LOC104918807	cytohesin-3, transcript variant X2	762	783	171	-25.58	miRNA: 3' uccUACUUGGGCGACGUCUCCu 5' |**||||:|::*:||||||||* target: 5' aaaATGAGCTTTTTGCAGAGGc 3'	764	785	-29	0.008158	target: 5' AGCUUUUUGCAGAGGC 3' |:|::*:||||||||* miRNA: 3' UUGGGCGACGUCUCCU 5'	no
lcr-miR-N148	rna-XM_027278300.1	gene-LOC104930405	LOC104930405	protocadherin gamma-C5, transcript variant X13	840	861	165	-30.43	miRNA: 3' ucCUACUUGGGCGA-CGUCUCCu 5' **||*|:|||*|||*|||||||: target: 5' caGA-GGACCGGCTGGCAGAGGg 3'	843	864	-33.2	0.005265	target: 5' GACCGGCUGGCAGAGGGU 3' :|||*|||*|||||||:* miRNA: 3' UUGGGCGA-CGUCUCCU- 5'	no
lcr-miR-N148	rna-XM_027274628.1	gene-mta1	mta1	metastasis associated 1, transcript variant X5	642	663	166	-28.16	miRNA: 3' uccuacuuGGGCGACGUCUCCu 5' :****|**|:|||||||||||* target: 5' gctcagtcCTCGCTGCAGAGGc 3'	639	660	-32.2	0.004856	target: 5' CAGUCCUCGCUGCAGAGGC 3' **|**|:|||||||||||* miRNA: 3' --CUUGGGCGACGUCUCCU 5'	no
lcr-miR-N148	rna-XM_019270269.2	gene-LOC104918489	LOC104918489	zinc finger protein GLIS1, transcript variant X2	1687	1708	172	-27.49	miRNA: 3' uccuacUUGGGCGACGUCUCCu 5' ***:**|||||||*|||||||* target: 5' tttgcaAACCCGCAGCAGAGGc 3'	1683	1704	-31.9	0.00682	target: 5' GCAAACCCGCAGCAGAGGC 3' |**|||||||*|||||||* miRNA: 3' C--UUGGGCGACGUCUCCU 5'	no
lcr-miR-N148	rna-XM_010730509.3	gene-LOC104918680	LOC104918680	dedicator of cytokinesis protein 7, transcript variant X2	777	797	165	-26.65	miRNA: 3' uccUACUUGGGCGACGUCUCCu 5' :**|||:|*::|:||||||||: target: 5' gaaATGGA-TTGTTGCAGAGGg 3'	774	795	-32.6	0.002622	target: 5' AUGGA-UUGUUGCAGAGGGA 3' *||:|*::|:||||||||:* miRNA: 3' -ACUUGGGCGACGUCUCCU- 5'	no
lcr-miR-N148	rna-XM_010735837.3	gene-LOC104922886	LOC104922886	atrial natriuretic peptide receptor 2, transcript variant X1	95	116	164	-30.36	miRNA: 3' ucCUACUUGGGCGACGUCUCCu 5' **|:|||*::|**||||||||| target: 5' ttGGTGATTTCCGTGCAGAGGa 3'	411	432	-28.3	0.006029	target: 5' AUUUCCG-UGCAGAGGAA 3' |**:|||*|||||||||* miRNA: 3' UU-GGGCGACGUCUCCU- 5'	no
lcr-miR-N148	rna-XM_027274625.1	gene-mta1	mta1	metastasis associated 1, transcript variant X5	642	663	166	-28.16	miRNA: 3' uccuacuuGGGCGACGUCUCCu 5' :****|**|:|||||||||||* target: 5' gctcagtcCTCGCTGCAGAGGc 3'	639	660	-32.2	0.004856	target: 5' CAGUCCUCGCUGCAGAGGC 3' **|**|:|||||||||||* miRNA: 3' --CUUGGGCGACGUCUCCU 5'	no
lcr-miR-N148	rna-XM_027283448.1	gene-LOC104929964	LOC104929964	suppressor of cytokine signaling 1	757	777	161	-26.62	miRNA: 3' uccUACUUGGGCGACGUCUCCu 5' ***:||*||**||||||||||: target: 5' taaGTG-ACAGGCTGCAGAGGg 3'	759	780	-30	0.007167	target: 5' -ACAGGCUGCAGAGGGA 3' *||**||||||||||:* miRNA: 3' UUGGGCGACGUCUCCU- 5'	no
lcr-miR-N148	rna-XM_027284711.1	gene-LOC104935257	LOC104935257	monocarboxylate transporter 4, transcript variant X4	1381	1402	160	-26.01	miRNA: 3' uccuacUUGGGCGACGUCUCCu 5' :**:**|:*::||||||||||| target: 5' gttgacAGATTGCTGCAGAGGa 3'	1372	1393	-38.2	0.000581	target: 5' GGGUUGACAGAUUGCUGCAGAGGAA 3' |:::*******::|||||||||||* miRNA: 3' CUUG-------GGCGACGUCUCCU- 5'	no
lcr-miR-N148	rna-XM_027288409.1	gene-tpd52l2	tpd52l2	TPD52 like 2, transcript variant X1	2413	2434	168	-25.07	miRNA: 3' uccuacUUGGGCGACGUCUCCu 5' :*****|:||*||||||||||* target: 5' gctcacAGCCAGCTGCAGAGGc 3'	2401	2422	-33	0.006319	target: 5' AGCCCGCUCACAGCCAGCUGCAGAGGC 3' |:|||||***********||||||||* miRNA: 3' UUGGGCG-----------ACGUCUCCU 5'	no
lcr-miR-N148	rna-XM_027288407.1	gene-tpd52l2	tpd52l2	TPD52 like 2, transcript variant X1	2413	2434	168	-25.07	miRNA: 3' uccuacUUGGGCGACGUCUCCu 5' :*****|:||*||||||||||* target: 5' gctcacAGCCAGCTGCAGAGGc 3'	2401	2422	-33	0.006319	target: 5' AGCCCGCUCACAGCCAGCUGCAGAGGC 3' |:|||||***********||||||||* miRNA: 3' UUGGGCG-----------ACGUCUCCU 5'	no
lcr-miR-N148	rna-XM_019263901.2	gene-LOC104930405	LOC104930405	protocadherin gamma-C5, transcript variant X13	840	861	165	-30.43	miRNA: 3' ucCUACUUGGGCGA-CGUCUCCu 5' **||*|:|||*|||*|||||||: target: 5' caGA-GGACCGGCTGGCAGAGGg 3'	843	864	-33.2	0.005265	target: 5' GACCGGCUGGCAGAGGGU 3' :|||*|||*|||||||:* miRNA: 3' UUGGGCGA-CGUCUCCU- 5'	no
lcr-miR-N148	rna-XM_027281983.1	gene-LOC104925547	LOC104925547	muscleblind-like protein 3, transcript variant X2	634	656	162	-25.53	miRNA: 3' uccUACUUGGG-CGACGUCUCCu 5' ***||**|::|*||||||||||| target: 5' tttATCTATTCAGCTGCAGAGGa 3'	631	652	-29.9	0.004867	target: 5' UAUCUAUUCAGCUGCAGAGGAG 3' *|:|:*****|||||||||||* miRNA: 3' UUGGG-----CGACGUCUCCU- 5'	no
lcr-miR-N148	rna-XM_027278192.1	gene-LOC104930405	LOC104930405	protocadherin gamma-C5, transcript variant X13	840	861	165	-30.43	miRNA: 3' ucCUACUUGGGCGA-CGUCUCCu 5' **||*|:|||*|||*|||||||: target: 5' caGA-GGACCGGCTGGCAGAGGg 3'	843	864	-33.2	0.005265	target: 5' GACCGGCUGGCAGAGGGU 3' :|||*|||*|||||||:* miRNA: 3' UUGGGCGA-CGUCUCCU- 5'	no
lcr-miR-N148	rna-XM_027288406.1	gene-tpd52l2	tpd52l2	TPD52 like 2, transcript variant X1	2413	2434	168	-25.07	miRNA: 3' uccuacUUGGGCGACGUCUCCu 5' :*****|:||*||||||||||* target: 5' gctcacAGCCAGCTGCAGAGGc 3'	2401	2422	-33	0.006319	target: 5' AGCCCGCUCACAGCCAGCUGCAGAGGC 3' |:|||||***********||||||||* miRNA: 3' UUGGGCG-----------ACGUCUCCU 5'	no
lcr-miR-N148	rna-XM_027280070.1	gene-lrch3	lrch3	leucine rich repeats and calponin homology domain containing 3, transcript variant X6	1603	1623	162	-27.16	miRNA: 3' ucCUACUUGGGCGACGUCUCCu 5' :|||*|||**|*|||||||||| target: 5' ggGACGAAGGC-CTGCAGAGGa 3'	1601	1622	-31.4	0.00817	target: 5' GAAGGC-CUGCAGAGGAU 3' |||**|*||||||||||* miRNA: 3' CUUGGGCGACGUCUCCU- 5'	no
lcr-miR-N148	rna-XM_027278267.1	gene-LOC104930405	LOC104930405	protocadherin gamma-C5, transcript variant X13	840	861	165	-30.43	miRNA: 3' ucCUACUUGGGCGA-CGUCUCCu 5' **||*|:|||*|||*|||||||: target: 5' caGA-GGACCGGCTGGCAGAGGg 3'	843	864	-33.2	0.005265	target: 5' GACCGGCUGGCAGAGGGU 3' :|||*|||*|||||||:* miRNA: 3' UUGGGCGA-CGUCUCCU- 5'	no
lcr-miR-N148	rna-XM_019255748.2	gene-gpr45	gpr45	G protein-coupled receptor 45, transcript variant X2	201	224	163	-26.66	miRNA: 3' ucCUACUUGGG--CGACGUCUCCu 5' **||**|||||***|||||||||| target: 5' ttGAACAACCCCATCTGCAGAGGa 3'	201	222	-31.4	0.005166	target: 5' AACAACCCCAUCUGCAGAGGAA 3' |***||||***||||||||||* miRNA: 3' U---UGGGC--GACGUCUCCU- 5'	no
lcr-miR-N148	rna-XM_019257265.2	gene-LOC104935786	LOC104935786	ETS-related transcription factor Elf-1, transcript variant X3	1380	1403	161	-24.82	miRNA: 3' uccuACUU--GGGCGACGUCUCCu 5' :***||||**||:|:*|||||||: target: 5' gattTGAAAGCCTGTAGCAGAGGg 3'	1377	1398	-34.2	0.001594	target: 5' UGAAAGCCUGUAGCAGAGGGA 3' |||**:||:|:*|||||||:* miRNA: 3' ACU--UGGGCGACGUCUCCU- 5'	no
lcr-miR-N148	rna-XM_019274653.2	gene-pbx3	pbx3	PBX homeobox 3, transcript variant X6	54	75	160	-24.58	miRNA: 3' ucCUACUUGGGCGACGUCUCCu 5' *||*|||*||**|*|||||||| target: 5' tgGCTGACCCAACAGCAGAGGa 3'	30	51	-30	0.000953	target: 5' UGGACUCUUUUAAAAACCUGGCUGACCCAACAGCAGAGGAU 3' ||:||:|*************|||*********||||||||* miRNA: 3' ACUUGGG-------------CGA---------CGUCUCCU- 5'	no
lcr-miR-N148	rna-XM_027278209.1	gene-LOC104930405	LOC104930405	protocadherin gamma-C5, transcript variant X13	840	861	165	-30.43	miRNA: 3' ucCUACUUGGGCGA-CGUCUCCu 5' **||*|:|||*|||*|||||||: target: 5' caGA-GGACCGGCTGGCAGAGGg 3'	843	864	-33.2	0.005265	target: 5' GACCGGCUGGCAGAGGGU 3' :|||*|||*|||||||:* miRNA: 3' UUGGGCGA-CGUCUCCU- 5'	no
lcr-miR-N148	rna-XM_027278262.1	gene-LOC104930405	LOC104930405	protocadherin gamma-C5, transcript variant X13	840	861	165	-30.43	miRNA: 3' ucCUACUUGGGCGA-CGUCUCCu 5' **||*|:|||*|||*|||||||: target: 5' caGA-GGACCGGCTGGCAGAGGg 3'	843	864	-33.2	0.005265	target: 5' GACCGGCUGGCAGAGGGU 3' :|||*|||*|||||||:* miRNA: 3' UUGGGCGA-CGUCUCCU- 5'	no
lcr-miR-N148	rna-XM_010730507.3	gene-LOC104918680	LOC104918680	dedicator of cytokinesis protein 7, transcript variant X2	777	797	165	-26.65	miRNA: 3' uccUACUUGGGCGACGUCUCCu 5' :**|||:|*::|:||||||||: target: 5' gaaATGGA-TTGTTGCAGAGGg 3'	774	795	-32.6	0.002622	target: 5' AUGGA-UUGUUGCAGAGGGA 3' *||:|*::|:||||||||:* miRNA: 3' -ACUUGGGCGACGUCUCCU- 5'	no
lcr-miR-N148	rna-XM_019265963.2	gene-LOC104939391	LOC104939391	thyroid hormone receptor-associated protein 3-like, transcript variant X1	278	299	167	-26.88	miRNA: 3' uccUACUUGGGCGACGUCUCCu 5' |**||||*||:|**|||||||| target: 5' aacATGATCCTGAAGCAGAGGa 3'	270	291	-31.6	0.004954	target: 5' GCAACAUGAUCCUGAAGCAGAGGAG 3' *****||||*||:|**||||||||* miRNA: 3' -----UACUUGGGCGACGUCUCCU- 5'	no
lcr-miR-N148	rna-XM_019255600.2	gene-LOC104940462	LOC104940462	genetic suppressor element 1, transcript variant X1	640	661	160	-22.46	miRNA: 3' ucCUACUUGGGCGACGUCUCCu 5' **|:|*||**:*|||||||||| target: 5' ctGGTAAAGGTTCTGCAGAGGa 3'	620	641	-31.6	0.006639	target: 5' AAGUUGUUUGUGUGCUGGUAAAGGUUCUGCAGAGGAU 3' |************:|:*|:********|||||||||* miRNA: 3' U------------UGGGCG--------ACGUCUCCU- 5'	no
lcr-miR-N148	rna-XM_010746013.3	gene-LOC104931087	LOC104931087	sclerostin domain-containing protein 1	2	22	164	-24.01	miRNA: 3' uccuACUUGGGCGACGUCUCCu 5' |***||||*:|*|||||||||: target: 5' acccTGAAATC-CTGCAGAGGg 3'	1	22	-27.6	0.003572	target: 5' AACCCUGAAAUCCUGCAGAGGGG 3' |||||*******|||||||||:* miRNA: 3' UUGGGC------GACGUCUCCU- 5'	no
lcr-miR-N148	rna-XM_027278258.1	gene-LOC104930405	LOC104930405	protocadherin gamma-C5, transcript variant X13	840	861	165	-30.43	miRNA: 3' ucCUACUUGGGCGA-CGUCUCCu 5' **||*|:|||*|||*|||||||: target: 5' caGA-GGACCGGCTGGCAGAGGg 3'	843	864	-33.2	0.005265	target: 5' GACCGGCUGGCAGAGGGU 3' :|||*|||*|||||||:* miRNA: 3' UUGGGCGA-CGUCUCCU- 5'	no
lcr-miR-N148	rna-XM_010748909.3	gene-hmgcs1	hmgcs1	3-hydroxy-3-methylglutaryl-CoA synthase 1	2207	2228	169	-31.62	miRNA: 3' uccuaCUUGGGCGACGUCUCCu 5' **|**|::||:|:||||||||* target: 5' ttgtaGGGCCTGTTGCAGAGGt 3'	2209	2230	-34.5	0.002771	target: 5' GGCCUGUUGCAGAGGU 3' ::||:|:||||||||* miRNA: 3' UUGGGCGACGUCUCCU 5'	no
lcr-miR-N148	rna-XM_027278279.1	gene-LOC104930405	LOC104930405	protocadherin gamma-C5, transcript variant X13	840	861	165	-30.43	miRNA: 3' ucCUACUUGGGCGA-CGUCUCCu 5' **||*|:|||*|||*|||||||: target: 5' caGA-GGACCGGCTGGCAGAGGg 3'	843	864	-33.2	0.005265	target: 5' GACCGGCUGGCAGAGGGU 3' :|||*|||*|||||||:* miRNA: 3' UUGGGCGA-CGUCUCCU- 5'	no
lcr-miR-N148	rna-XM_010739931.3	gene-LOC104926141	LOC104926141	serine/threonine-protein kinase LATS1, transcript variant X3	370	390	160	-24.28	miRNA: 3' uccuACUUGGGCGACGUCUCCu 5' *|**||||**|*|||||||||| target: 5' tgccTGAAAAC-CTGCAGAGGa 3'	359	380	-31.6	0.005449	target: 5' UGCGCUGCCUGAAAACCUGCAGAGGAA 3' ||****:||:|*****||||||||||* miRNA: 3' ACU---UGGGC-----GACGUCUCCU- 5'	no
lcr-miR-N148	rna-XM_010730840.3	gene-pgrmc1	pgrmc1	progesterone receptor membrane component 1	1774	1795	167	-27.69	miRNA: 3' uccUACUUGGGCGACGUCUCCu 5' ***:||:**|:||||||||||* target: 5' tttGTGGTGCTGCTGCAGAGGc 3'	1775	1796	-35.4	0.001438	target: 5' GUGCUGCUGCAGAGGC 3' :**|:||||||||||* miRNA: 3' UUGGGCGACGUCUCCU 5'	no
lcr-miR-N148	rna-XM_019275505.2	gene-ctxn2	ctxn2	cortexin 2, transcript variant X1	1100	1122	162	-27.81	miRNA: 3' uccuacuUGGGC-GACGUCUCCu 5' *******|||:|*|||||||||| target: 5' tctcactACCTGCCTGCAGAGGa 3'	1089	1110	-34.4	0.001483	target: 5' AAACUCUCACUACCUGCCUGCAGAGGAA 3' *|*********|||:|*||||||||||* miRNA: 3' CU---------UGGGC-GACGUCUCCU- 5'	no
lcr-miR-N149	rna-XM_027283049.1	gene-LOC104921153	LOC104921153	axin-1, transcript variant X1	314	335	160	-29.01	miRNA: 3' ucCUACUUGGGCGACGUCUCCu 5' **||||||*|||**||:||||| target: 5' caGATGAAACCGGAGCGGAGGa 3'	315	336	-35	0.00349	target: 5' AAACCGGAGCGGAGGAA 3' ||*|||**||:|||||* miRNA: 3' UUGGGCGACGUCUCCU- 5'	no
lcr-miR-N149	rna-XM_010730509.3	gene-LOC104918680	LOC104918680	dedicator of cytokinesis protein 7, transcript variant X2	777	797	165	-26.65	miRNA: 3' uccUACUUGGGCGACGUCUCCu 5' :**|||:|*::|:||||||||: target: 5' gaaATGGA-TTGTTGCAGAGGg 3'	774	795	-32.6	0.002622	target: 5' AUGGA-UUGUUGCAGAGGGA 3' *||:|*::|:||||||||:* miRNA: 3' -ACUUGGGCGACGUCUCCU- 5'	no
lcr-miR-N149	rna-XM_027284711.1	gene-LOC104935257	LOC104935257	monocarboxylate transporter 4, transcript variant X4	1381	1402	160	-26.01	miRNA: 3' uccuacUUGGGCGACGUCUCCu 5' :**:**|:*::||||||||||| target: 5' gttgacAGATTGCTGCAGAGGa 3'	1372	1393	-38.2	0.000581	target: 5' GGGUUGACAGAUUGCUGCAGAGGAA 3' |:::*******::|||||||||||* miRNA: 3' CUUG-------GGCGACGUCUCCU- 5'	no
lcr-miR-N149	rna-XM_027274628.1	gene-mta1	mta1	metastasis associated 1, transcript variant X5	642	663	166	-28.16	miRNA: 3' uccuacuuGGGCGACGUCUCCu 5' :****|**|:|||||||||||* target: 5' gctcagtcCTCGCTGCAGAGGc 3'	639	660	-32.2	0.004856	target: 5' CAGUCCUCGCUGCAGAGGC 3' **|**|:|||||||||||* miRNA: 3' --CUUGGGCGACGUCUCCU 5'	no
lcr-miR-N149	rna-XM_019262548.2	gene-LOC104935257	LOC104935257	monocarboxylate transporter 4, transcript variant X4	1381	1402	160	-26.01	miRNA: 3' uccuacUUGGGCGACGUCUCCu 5' :**:**|:*::||||||||||| target: 5' gttgacAGATTGCTGCAGAGGa 3'	1372	1393	-38.2	0.000581	target: 5' GGGUUGACAGAUUGCUGCAGAGGAA 3' |:::*******::|||||||||||* miRNA: 3' CUUG-------GGCGACGUCUCCU- 5'	no
lcr-miR-N149	rna-XM_019265963.2	gene-LOC104939391	LOC104939391	thyroid hormone receptor-associated protein 3-like, transcript variant X1	278	299	167	-26.88	miRNA: 3' uccUACUUGGGCGACGUCUCCu 5' |**||||*||:|**|||||||| target: 5' aacATGATCCTGAAGCAGAGGa 3'	270	291	-31.6	0.004954	target: 5' GCAACAUGAUCCUGAAGCAGAGGAG 3' *****||||*||:|**||||||||* miRNA: 3' -----UACUUGGGCGACGUCUCCU- 5'	no
lcr-miR-N149	rna-XM_010751066.3	gene-LOC104935257	LOC104935257	monocarboxylate transporter 4, transcript variant X4	1381	1402	160	-26.01	miRNA: 3' uccuacUUGGGCGACGUCUCCu 5' :**:**|:*::||||||||||| target: 5' gttgacAGATTGCTGCAGAGGa 3'	1372	1393	-38.2	0.000581	target: 5' GGGUUGACAGAUUGCUGCAGAGGAA 3' |:::*******::|||||||||||* miRNA: 3' CUUG-------GGCGACGUCUCCU- 5'	no
lcr-miR-N149	rna-XM_027281977.1	gene-LOC104920570	LOC104920570	bromodomain-containing protein 8	305	325	162	-26.81	miRNA: 3' uccuacUUGGGCGACGUCUCCu 5' :|*|**||||:*|||||||||| target: 5' ggtactAACCT-CTGCAGAGGa 3'	303	324	-32.2	0.005545	target: 5' CUAACCU-CUGCAGAGGAG 3' **||||:*||||||||||* miRNA: 3' C-UUGGGCGACGUCUCCU- 5'	no
lcr-miR-N149	rna-XM_027278209.1	gene-LOC104930405	LOC104930405	protocadherin gamma-C5, transcript variant X13	840	861	165	-30.43	miRNA: 3' ucCUACUUGGGCGA-CGUCUCCu 5' **||*|:|||*|||*|||||||: target: 5' caGA-GGACCGGCTGGCAGAGGg 3'	843	864	-33.2	0.005265	target: 5' GACCGGCUGGCAGAGGGU 3' :|||*|||*|||||||:* miRNA: 3' UUGGGCGA-CGUCUCCU- 5'	no
lcr-miR-N149	rna-XM_027286605.1	gene-pi4kb	pi4kb	phosphatidylinositol 4-kinase beta, transcript variant X1	2160	2180	164	-30.33	miRNA: 3' ucCU-ACUUGGGCGACGUCUCCu 5' *|||*||||||:|**|||||||: target: 5' cgGACTGAACCTG--GCAGAGGg 3'	2158	2179	-33.6	0.004343	target: 5' GAACCUG--GCAGAGGGU 3' |||||:|**|||||||:* miRNA: 3' CUUGGGCGACGUCUCCU- 5'	no
lcr-miR-N149	rna-XM_010739931.3	gene-LOC104926141	LOC104926141	serine/threonine-protein kinase LATS1, transcript variant X3	370	390	160	-24.28	miRNA: 3' uccuACUUGGGCGACGUCUCCu 5' *|**||||**|*|||||||||| target: 5' tgccTGAAAAC-CTGCAGAGGa 3'	359	380	-31.6	0.005449	target: 5' UGCGCUGCCUGAAAACCUGCAGAGGAA 3' ||****:||:|*****||||||||||* miRNA: 3' ACU---UGGGC-----GACGUCUCCU- 5'	no
lcr-miR-N149	rna-XM_027288405.1	gene-tpd52l2	tpd52l2	TPD52 like 2, transcript variant X1	2413	2434	168	-25.07	miRNA: 3' uccuacUUGGGCGACGUCUCCu 5' :*****|:||*||||||||||* target: 5' gctcacAGCCAGCTGCAGAGGc 3'	2401	2422	-33	0.006319	target: 5' AGCCCGCUCACAGCCAGCUGCAGAGGC 3' |:|||||***********||||||||* miRNA: 3' UUGGGCG-----------ACGUCUCCU 5'	no
lcr-miR-N149	rna-XM_019253995.2	gene-sigirr	sigirr	single Ig and TIR domain containing	275	296	166	-23.27	miRNA: 3' uccuACUUGGGCGACGUCUCCu 5' ****|||:|:|*|*|||||||: target: 5' tcttTGAGCTCCCAGCAGAGGg 3'	278	299	-28.6	0.005827	target: 5' AGCUCCCAGCAGAGGGC 3' |:|:|*|*|||||||:* miRNA: 3' UUGGGCGACGUCUCCU- 5'	no
lcr-miR-N149	rna-XM_027285299.1	gene-LOC109136703	LOC109136703	neurabin-1, transcript variant X6	179	199	160	-26.37	miRNA: 3' uccuACUUGGGCGACGUCUCCu 5' ****||:|||:|**|||||||* target: 5' tcttTGGACCTG-AGCAGAGGt 3'	182	203	-29.8	0.007615	target: 5' GACCUGA-GCAGAGGU 3' :|||:|**|||||||* miRNA: 3' UUGGGCGACGUCUCCU 5'	no
lcr-miR-N149	rna-XM_019274651.2	gene-pbx3	pbx3	PBX homeobox 3, transcript variant X6	54	75	160	-24.58	miRNA: 3' ucCUACUUGGGCGACGUCUCCu 5' *||*|||*||**|*|||||||| target: 5' tgGCTGACCCAACAGCAGAGGa 3'	30	51	-30	0.000953	target: 5' UGGACUCUUUUAAAAACCUGGCUGACCCAACAGCAGAGGAU 3' ||:||:|*************|||*********||||||||* miRNA: 3' ACUUGGG-------------CGA---------CGUCUCCU- 5'	no
lcr-miR-N149	rna-XM_027285300.1	gene-LOC109136703	LOC109136703	neurabin-1, transcript variant X6	179	199	160	-26.37	miRNA: 3' uccuACUUGGGCGACGUCUCCu 5' ****||:|||:|**|||||||* target: 5' tcttTGGACCTG-AGCAGAGGt 3'	182	203	-29.8	0.007615	target: 5' GACCUGA-GCAGAGGU 3' :|||:|**|||||||* miRNA: 3' UUGGGCGACGUCUCCU 5'	no
lcr-miR-N149	rna-XM_027274625.1	gene-mta1	mta1	metastasis associated 1, transcript variant X5	642	663	166	-28.16	miRNA: 3' uccuacuuGGGCGACGUCUCCu 5' :****|**|:|||||||||||* target: 5' gctcagtcCTCGCTGCAGAGGc 3'	639	660	-32.2	0.004856	target: 5' CAGUCCUCGCUGCAGAGGC 3' **|**|:|||||||||||* miRNA: 3' --CUUGGGCGACGUCUCCU 5'	no
lcr-miR-N149	rna-XM_027285296.1	gene-LOC109136703	LOC109136703	neurabin-1, transcript variant X6	179	199	160	-26.37	miRNA: 3' uccuACUUGGGCGACGUCUCCu 5' ****||:|||:|**|||||||* target: 5' tcttTGGACCTG-AGCAGAGGt 3'	182	203	-29.8	0.007615	target: 5' GACCUGA-GCAGAGGU 3' :|||:|**|||||||* miRNA: 3' UUGGGCGACGUCUCCU 5'	no
lcr-miR-N149	rna-XM_027272194.1	gene-LOC113744060	LOC113744060	glucagon family neuropeptides-like, transcript variant X2	2218	2240	170	-30.09	miRNA: 3' uccUACUUGGGCG-ACGUCUCCu 5' *|*:|||:|*|||*||||||||* target: 5' tgtGTGAGCGCGCATGCAGAGGt 3'	2218	2239	-33	0.006008	target: 5' AGCGCGCAUGCAGAGGU 3' |:|*|||*||||||||* miRNA: 3' UUGGGCG-ACGUCUCCU 5'	no
lcr-miR-N149	rna-XM_010736819.3	gene-LOC104923568	LOC104923568	F-box only protein 11, transcript variant X4	173	195	163	-29.81	miRNA: 3' ucCUAC-UUGGGCGACGUCUCCu 5' :*|:||*||***||||||||||| target: 5' gaGGTGAAAGAGGCTGCAGAGGa 3'	173	194	-33.7	0.001909	target: 5' GAAAGAGGCUGCAGAGGAA 3' |||****|||||||||||* miRNA: 3' CUUGGG-CGACGUCUCCU- 5'	no
lcr-miR-N149	rna-XM_027285315.1	gene-stk11	stk11	serine/threonine kinase 11, transcript variant X2	556	577	167	-26.67	miRNA: 3' uccUACUUGGGCGACGUCUCCu 5' :**|||:::*|*|||||||||| target: 5' gtcATGGGTGCACTGCAGAGGa 3'	540	561	-31.4	0.004907	target: 5' UGAGUAUCGCGCAGGCGGAGGAA 3' |||**|:|*|||**||:|||||* miRNA: 3' ACU--UGG-GCGA-CGUCUCCU- 5'	no
lcr-miR-N149	rna-XM_027289652.1	gene-LOC104938095	LOC104938095	mitofusin-1, transcript variant X1	455	473	163	-24.55	miRNA: 3' uccUACUUGGGCGACGUCUCCu 5' ***|||||***||||||||||| target: 5' ttcATGAA---GCTGCAGAGGa 3'	450	471	-33.5	0.000417	target: 5' UCAUGAAGCUGCAGAGGAA 3' **|:***|||||||||||* miRNA: 3' CUUGGG-CGACGUCUCCU- 5'	no
lcr-miR-N149	rna-XM_019253034.2	gene-tfap2a	tfap2a	transcription factor AP-2 alpha, transcript variant X5	327	348	160	-26.01	miRNA: 3' ucCUACUUGGGCGACGUCUCCu 5' |*||**||***||||||||||| target: 5' aaGAGAAAAAAGCTGCAGAGGa 3'	330	351	-30.4	0.001848	target: 5' AAAAAAGCUGCAGAGGAA 3' ||****|||||||||||* miRNA: 3' UUGGG-CGACGUCUCCU- 5'	no
lcr-miR-N149	rna-XM_010745189.3	gene-LOC104930405	LOC104930405	protocadherin gamma-C5, transcript variant X13	840	861	165	-30.43	miRNA: 3' ucCUACUUGGGCGA-CGUCUCCu 5' **||*|:|||*|||*|||||||: target: 5' caGA-GGACCGGCTGGCAGAGGg 3'	843	864	-33.2	0.005265	target: 5' GACCGGCUGGCAGAGGGU 3' :|||*|||*|||||||:* miRNA: 3' UUGGGCGA-CGUCUCCU- 5'	no
lcr-miR-N149	rna-XM_027288408.1	gene-tpd52l2	tpd52l2	TPD52 like 2, transcript variant X1	2836	2857	168	-25.07	miRNA: 3' uccuacUUGGGCGACGUCUCCu 5' :*****|:||*||||||||||* target: 5' gctcacAGCCAGCTGCAGAGGc 3'	2824	2845	-33	0.007742	target: 5' AGCCCGCUCACAGCCAGCUGCAGAGGC 3' |:|||||***********||||||||* miRNA: 3' UUGGGCG-----------ACGUCUCCU 5'	no
lcr-miR-N149	rna-XM_027278269.1	gene-LOC104930405	LOC104930405	protocadherin gamma-C5, transcript variant X13	840	861	165	-30.43	miRNA: 3' ucCUACUUGGGCGA-CGUCUCCu 5' **||*|:|||*|||*|||||||: target: 5' caGA-GGACCGGCTGGCAGAGGg 3'	843	864	-33.2	0.005265	target: 5' GACCGGCUGGCAGAGGGU 3' :|||*|||*|||||||:* miRNA: 3' UUGGGCGA-CGUCUCCU- 5'	no
lcr-miR-N149	rna-XM_010736741.3	gene-LOC104923568	LOC104923568	F-box only protein 11, transcript variant X4	173	195	163	-29.81	miRNA: 3' ucCUAC-UUGGGCGACGUCUCCu 5' :*|:||*||***||||||||||| target: 5' gaGGTGAAAGAGGCTGCAGAGGa 3'	173	194	-33.7	0.001909	target: 5' GAAAGAGGCUGCAGAGGAA 3' |||****|||||||||||* miRNA: 3' CUUGGG-CGACGUCUCCU- 5'	no
lcr-miR-N149	rna-XM_019271834.2	gene-camsap1	camsap1	calmodulin regulated spectrin associated protein 1, transcript variant X1	106	129	163	-27.32	miRNA: 3' uccuacUUGGGCGA--CGUCUCCu 5' :**:**||||:|||**|||||||* target: 5' gctggaAACCTGCTCGGCAGAGGc 3'	102	123	-33.1	0.004386	target: 5' UGGAAACCUGCUCGGCAGAGGC 3' ||:**|||:|||**|||||||* miRNA: 3' ACU--UGGGCGA--CGUCUCCU 5'	no
lcr-miR-N149	rna-XM_019279012.2	gene-LOC109143071	LOC109143071	phospholipase B1, membrane-associated	145	166	168	-23.9	miRNA: 3' ucCUACUUGGGCGACGUCUCCu 5' **||*|||*::*|||||||||* target: 5' caGAGGAAATTACTGCAGAGGt 3'	59	80	-34.7	0.000198	target: 5' AGAGUGGAUCACCUCCUGCAGAGGAG 3' *||*******|||:*||||||||||* miRNA: 3' -CU-------UGGGCGACGUCUCCU- 5'	no
lcr-miR-N149	rna-XM_019264784.2	gene-dnmbp	dnmbp	dynamin binding protein, transcript variant X1	595	616	162	-20.55	miRNA: 3' uccuACUUGGGCGACGUCUCCu 5' :***||||*:**|||||||||* target: 5' gtttTGAAGTGTCTGCAGAGGc 3'	570	591	-29.3	0.008713	target: 5' GAUUAUCUACUGGUUGCUAGUUUUGAAGUGUCUGCAGAGGC 3' ||*************:|:**********:|*|||||||||* miRNA: 3' CU-------------UGG----------GC-GACGUCUCCU 5'	no
lcr-miR-N149	rna-XM_027287166.1	gene-LOC104931065	LOC104931065	spliceosome RNA helicase DDX39B, transcript variant X1	162	183	162	-27.14	miRNA: 3' uccuacuuGGGCGACGUCUCCu 5' :****|**|||*|||||||||| target: 5' gtacagctCCCTCTGCAGAGGa 3'	166	187	-30.6	0.000938	target: 5' CUCCCUCUGCAGAGGAG 3' **|||*||||||||||* miRNA: 3' UUGGGCGACGUCUCCU- 5'	no
lcr-miR-N149	rna-XM_019273906.2	gene-LOC104919939	LOC104919939	rap guanine nucleotide exchange factor 3, transcript variant X1	1746	1770	162	-29.27	miRNA: 3' ucCUACUUGGGC-GA--CGUCUCCu 5' :||||||||**|*||**|||||||: target: 5' ggGATGAACAGGACTAAGCAGAGGg 3'	1744	1765	-33.4	0.007126	target: 5' GAACAGGACUAAGCAGAGGGA 3' ||||**|*||**|||||||:* miRNA: 3' CUUGGGC-GA--CGUCUCCU- 5'	no
lcr-miR-N149	rna-XM_027278282.1	gene-LOC104930405	LOC104930405	protocadherin gamma-C5, transcript variant X13	840	861	165	-30.43	miRNA: 3' ucCUACUUGGGCGA-CGUCUCCu 5' **||*|:|||*|||*|||||||: target: 5' caGA-GGACCGGCTGGCAGAGGg 3'	843	864	-33.2	0.005265	target: 5' GACCGGCUGGCAGAGGGU 3' :|||*|||*|||||||:* miRNA: 3' UUGGGCGA-CGUCUCCU- 5'	no
lcr-miR-N149	rna-XM_010742076.3	gene-dnmbp	dnmbp	dynamin binding protein, transcript variant X1	595	616	162	-20.55	miRNA: 3' uccuACUUGGGCGACGUCUCCu 5' :***||||*:**|||||||||* target: 5' gtttTGAAGTGTCTGCAGAGGc 3'	570	591	-29.3	0.008713	target: 5' GAUUAUCUACUGGUUGCUAGUUUUGAAGUGUCUGCAGAGGC 3' ||*************:|:**********:|*|||||||||* miRNA: 3' CU-------------UGG----------GC-GACGUCUCCU 5'	no
lcr-miR-N149	rna-XM_019275505.2	gene-ctxn2	ctxn2	cortexin 2, transcript variant X1	1100	1122	162	-27.81	miRNA: 3' uccuacuUGGGC-GACGUCUCCu 5' *******|||:|*|||||||||| target: 5' tctcactACCTGCCTGCAGAGGa 3'	1089	1110	-34.4	0.001483	target: 5' AAACUCUCACUACCUGCCUGCAGAGGAA 3' *|*********|||:|*||||||||||* miRNA: 3' CU---------UGGGC-GACGUCUCCU- 5'	no
lcr-miR-N149	rna-XM_019273905.2	gene-LOC104919939	LOC104919939	rap guanine nucleotide exchange factor 3, transcript variant X1	1746	1770	162	-29.27	miRNA: 3' ucCUACUUGGGC-GA--CGUCUCCu 5' :||||||||**|*||**|||||||: target: 5' ggGATGAACAGGACTAAGCAGAGGg 3'	1744	1765	-33.4	0.007126	target: 5' GAACAGGACUAAGCAGAGGGA 3' ||||**|*||**|||||||:* miRNA: 3' CUUGGGC-GA--CGUCUCCU- 5'	no
lcr-miR-N149	rna-XM_027290780.1	gene-gpr45	gpr45	G protein-coupled receptor 45, transcript variant X2	201	224	163	-26.66	miRNA: 3' ucCUACUUGGG--CGACGUCUCCu 5' **||**|||||***|||||||||| target: 5' ttGAACAACCCCATCTGCAGAGGa 3'	201	222	-31.4	0.005166	target: 5' AACAACCCCAUCUGCAGAGGAA 3' |***||||***||||||||||* miRNA: 3' U---UGGGC--GACGUCUCCU- 5'	no
lcr-miR-N149	rna-XM_019272688.2	gene-pigu	pigu	phosphatidylinositol glycan anchor biosynthesis class U	329	353	164	-29.24	miRNA: 3' uccuaCUUGGGC---GACGUCUCCu 5' :****|||||:|***|||||||||* target: 5' gcctgGAACCTGCGCCTGCAGAGGt 3'	333	354	-32.4	0.004987	target: 5' AACCUGCGCCUGCAGAGGU 3' ||||:||***||||||||* miRNA: 3' UUGGGCG---ACGUCUCCU 5'	no
lcr-miR-N149	rna-XM_010735837.3	gene-LOC104922886	LOC104922886	atrial natriuretic peptide receptor 2, transcript variant X1	95	116	164	-30.36	miRNA: 3' ucCUACUUGGGCGACGUCUCCu 5' **|:|||*::|**||||||||| target: 5' ttGGTGATTTCCGTGCAGAGGa 3'	411	432	-28.3	0.006029	target: 5' AUUUCCG-UGCAGAGGAA 3' |**:|||*|||||||||* miRNA: 3' UU-GGGCGACGUCUCCU- 5'	no
lcr-miR-N149	rna-XM_010756870.3	gene-LOC104940300	LOC104940300	brain-specific angiogenesis inhibitor 1-associated protein 2, transcript variant X2	1150	1171	164	-30.54	miRNA: 3' ucCUACUUGGGCGACGUCUCCu 5' :*|:*||:|::|:*|||||||* target: 5' gaGGAGAGCTTGTAGCAGAGGt 3'	1149	1170	-33.6	0.002153	target: 5' GAGCUUGUAGCAGAGGU 3' ||:|::|:*|||||||* miRNA: 3' CUUGGGCGACGUCUCCU 5'	no
lcr-miR-N149	rna-XM_027278253.1	gene-LOC104930405	LOC104930405	protocadherin gamma-C5, transcript variant X13	840	861	165	-30.43	miRNA: 3' ucCUACUUGGGCGA-CGUCUCCu 5' **||*|:|||*|||*|||||||: target: 5' caGA-GGACCGGCTGGCAGAGGg 3'	843	864	-33.2	0.005265	target: 5' GACCGGCUGGCAGAGGGU 3' :|||*|||*|||||||:* miRNA: 3' UUGGGCGA-CGUCUCCU- 5'	no
lcr-miR-N149	rna-XM_027289312.1	gene-dnmbp	dnmbp	dynamin binding protein, transcript variant X1	595	616	162	-20.55	miRNA: 3' uccuACUUGGGCGACGUCUCCu 5' :***||||*:**|||||||||* target: 5' gtttTGAAGTGTCTGCAGAGGc 3'	570	591	-29.3	0.008713	target: 5' GAUUAUCUACUGGUUGCUAGUUUUGAAGUGUCUGCAGAGGC 3' ||*************:|:**********:|*|||||||||* miRNA: 3' CU-------------UGG----------GC-GACGUCUCCU 5'	no
lcr-miR-N149	rna-XM_019270269.2	gene-LOC104918489	LOC104918489	zinc finger protein GLIS1, transcript variant X2	1687	1708	172	-27.49	miRNA: 3' uccuacUUGGGCGACGUCUCCu 5' ***:**|||||||*|||||||* target: 5' tttgcaAACCCGCAGCAGAGGc 3'	1683	1704	-31.9	0.00682	target: 5' GCAAACCCGCAGCAGAGGC 3' |**|||||||*|||||||* miRNA: 3' C--UUGGGCGACGUCUCCU 5'	no
lcr-miR-N149	rna-XM_019260011.2	gene-LOC104918135	LOC104918135	transmembrane protein 116, transcript variant X2	395	415	166	-24.84	miRNA: 3' ucCUACUUGGGCGACGUCUCCu 5' :*||||*||*:||*|||||||: target: 5' gtGATG-ACATGCAGCAGAGGg 3'	390	411	-29.7	0.005477	target: 5' UGAUGACAUGCAGCAGAGGGC 3' |||**||*:||*|||||||:* miRNA: 3' ACU--UGGGCGACGUCUCCU- 5'	no
lcr-miR-N149	rna-XM_027278258.1	gene-LOC104930405	LOC104930405	protocadherin gamma-C5, transcript variant X13	840	861	165	-30.43	miRNA: 3' ucCUACUUGGGCGA-CGUCUCCu 5' **||*|:|||*|||*|||||||: target: 5' caGA-GGACCGGCTGGCAGAGGg 3'	843	864	-33.2	0.005265	target: 5' GACCGGCUGGCAGAGGGU 3' :|||*|||*|||||||:* miRNA: 3' UUGGGCGA-CGUCUCCU- 5'	no
lcr-miR-N149	rna-XM_019262296.2	gene-stk11	stk11	serine/threonine kinase 11, transcript variant X2	556	577	167	-26.67	miRNA: 3' uccUACUUGGGCGACGUCUCCu 5' :**|||:::*|*|||||||||| target: 5' gtcATGGGTGCACTGCAGAGGa 3'	540	561	-31.4	0.004907	target: 5' UGAGUAUCGCGCAGGCGGAGGAA 3' |||**|:|*|||**||:|||||* miRNA: 3' ACU--UGG-GCGA-CGUCUCCU- 5'	no
lcr-miR-N149	rna-XM_010743839.3	gene-soat1	soat1	sterol O-acyltransferase 1	5	25	160	-26.46	miRNA: 3' uccuACUUGGGCGACGUCUCCu 5' *|**||:|*|:*|||||||||| target: 5' tgttTGGA-CTACTGCAGAGGa 3'	8	29	-31.1	0.009286	target: 5' GACUA-CUGCAGAGGAC 3' :||:**||||||||||* miRNA: 3' UUGGGCGACGUCUCCU- 5'	no
lcr-miR-N149	rna-XM_019263901.2	gene-LOC104930405	LOC104930405	protocadherin gamma-C5, transcript variant X13	840	861	165	-30.43	miRNA: 3' ucCUACUUGGGCGA-CGUCUCCu 5' **||*|:|||*|||*|||||||: target: 5' caGA-GGACCGGCTGGCAGAGGg 3'	843	864	-33.2	0.005265	target: 5' GACCGGCUGGCAGAGGGU 3' :|||*|||*|||||||:* miRNA: 3' UUGGGCGA-CGUCUCCU- 5'	no
lcr-miR-N149	rna-XM_010745985.3	gene-LOC104931065	LOC104931065	spliceosome RNA helicase DDX39B, transcript variant X1	162	183	162	-27.14	miRNA: 3' uccuacuuGGGCGACGUCUCCu 5' :****|**|||*|||||||||| target: 5' gtacagctCCCTCTGCAGAGGa 3'	166	187	-30.6	0.000938	target: 5' CUCCCUCUGCAGAGGAG 3' **|||*||||||||||* miRNA: 3' UUGGGCGACGUCUCCU- 5'	no
lcr-miR-N149	rna-XM_010752397.3	gene-LOC104936370	LOC104936370	neural proliferation differentiation and control protein 1	83	106	162	-27.05	miRNA: 3' uccUACUU--GGGCGACGUCUCCu 5' :**|||:|**|:||:*|||||||| target: 5' gaaATGGAGGCTCGTGGCAGAGGa 3'	87	108	-32.8	0.001504	target: 5' GGCUCGUGGCAGAGGAC 3' ::|:||:*||||||||* miRNA: 3' UUGGGCGACGUCUCCU- 5'	no
lcr-miR-N149	rna-XM_010750406.3	gene-serf2	serf2	small EDRK-rich factor 2	212	234	166	-28.89	miRNA: 3' uccUACUUGGGCG-ACGUCUCCu 5' |**|||:*:|:||*||||||||| target: 5' acaATGGTTCTGCATGCAGAGGa 3'	214	235	-30.8	0.000793	target: 5' GUUCUGCAUGCAGAGGAG 3' :*:|:||*|||||||||* miRNA: 3' UUGGGCG-ACGUCUCCU- 5'	no
lcr-miR-N149	rna-XM_010729782.3	gene-LOC104918135	LOC104918135	transmembrane protein 116, transcript variant X2	395	415	166	-24.84	miRNA: 3' ucCUACUUGGGCGACGUCUCCu 5' :*||||*||*:||*|||||||: target: 5' gtGATG-ACATGCAGCAGAGGg 3'	390	411	-29.7	0.005477	target: 5' UGAUGACAUGCAGCAGAGGGC 3' |||**||*:||*|||||||:* miRNA: 3' ACU--UGGGCGACGUCUCCU- 5'	no
lcr-miR-N149	rna-XM_027278279.1	gene-LOC104930405	LOC104930405	protocadherin gamma-C5, transcript variant X13	840	861	165	-30.43	miRNA: 3' ucCUACUUGGGCGA-CGUCUCCu 5' **||*|:|||*|||*|||||||: target: 5' caGA-GGACCGGCTGGCAGAGGg 3'	843	864	-33.2	0.005265	target: 5' GACCGGCUGGCAGAGGGU 3' :|||*|||*|||||||:* miRNA: 3' UUGGGCGA-CGUCUCCU- 5'	no
lcr-miR-N149	rna-XM_010751678.3	gene-LOC104935786	LOC104935786	ETS-related transcription factor Elf-1, transcript variant X3	1380	1403	161	-24.82	miRNA: 3' uccuACUU--GGGCGACGUCUCCu 5' :***||||**||:|:*|||||||: target: 5' gattTGAAAGCCTGTAGCAGAGGg 3'	1377	1398	-34.2	0.001594	target: 5' UGAAAGCCUGUAGCAGAGGGA 3' |||**:||:|:*|||||||:* miRNA: 3' ACU--UGGGCGACGUCUCCU- 5'	no
lcr-miR-N149	rna-XM_027278234.1	gene-LOC104930405	LOC104930405	protocadherin gamma-C5, transcript variant X13	840	861	165	-30.43	miRNA: 3' ucCUACUUGGGCGA-CGUCUCCu 5' **||*|:|||*|||*|||||||: target: 5' caGA-GGACCGGCTGGCAGAGGg 3'	843	864	-33.2	0.005265	target: 5' GACCGGCUGGCAGAGGGU 3' :|||*|||*|||||||:* miRNA: 3' UUGGGCGA-CGUCUCCU- 5'	no
lcr-miR-N149	rna-XM_027278294.1	gene-LOC104930405	LOC104930405	protocadherin gamma-C5, transcript variant X13	840	861	165	-30.43	miRNA: 3' ucCUACUUGGGCGA-CGUCUCCu 5' **||*|:|||*|||*|||||||: target: 5' caGA-GGACCGGCTGGCAGAGGg 3'	843	864	-33.2	0.005265	target: 5' GACCGGCUGGCAGAGGGU 3' :|||*|||*|||||||:* miRNA: 3' UUGGGCGA-CGUCUCCU- 5'	no
lcr-miR-N149	rna-XM_027280756.1	gene-sptbn4	sptbn4	spectrin beta, non-erythrocytic 4, transcript variant X1	2016	2037	172	-26.83	miRNA: 3' ucCUACUUGGGCGACGUCUCCu 5' :*||*|*:|||*|||||||||* target: 5' gaGAAGCGCCCACTGCAGAGGc 3'	2005	2026	-34.2	0.006184	target: 5' UUUGAGAAGCGCCCACUGCAGAGGC 3' **|||*****:|||*|||||||||* miRNA: 3' --ACU-----UGGGCGACGUCUCCU 5'	no
lcr-miR-N149	rna-XM_027283050.1	gene-LOC104921153	LOC104921153	axin-1, transcript variant X1	314	335	160	-29.01	miRNA: 3' ucCUACUUGGGCGACGUCUCCu 5' **||||||*|||**||:||||| target: 5' caGATGAAACCGGAGCGGAGGa 3'	315	336	-35	0.00349	target: 5' AAACCGGAGCGGAGGAA 3' ||*|||**||:|||||* miRNA: 3' UUGGGCGACGUCUCCU- 5'	no
lcr-miR-N149	rna-XM_019268024.2	gene-LOC104923568	LOC104923568	F-box only protein 11, transcript variant X4	173	195	163	-29.81	miRNA: 3' ucCUAC-UUGGGCGACGUCUCCu 5' :*|:||*||***||||||||||| target: 5' gaGGTGAAAGAGGCTGCAGAGGa 3'	173	194	-33.7	0.001909	target: 5' GAAAGAGGCUGCAGAGGAA 3' |||****|||||||||||* miRNA: 3' CUUGGG-CGACGUCUCCU- 5'	no
lcr-miR-N149	rna-XM_027278275.1	gene-LOC104930405	LOC104930405	protocadherin gamma-C5, transcript variant X13	840	861	165	-30.43	miRNA: 3' ucCUACUUGGGCGA-CGUCUCCu 5' **||*|:|||*|||*|||||||: target: 5' caGA-GGACCGGCTGGCAGAGGg 3'	843	864	-33.2	0.005265	target: 5' GACCGGCUGGCAGAGGGU 3' :|||*|||*|||||||:* miRNA: 3' UUGGGCGA-CGUCUCCU- 5'	no
lcr-miR-N149	rna-XM_010753347.3	gene-il20rb	il20rb	interleukin 20 receptor subunit beta	133	154	164	-29.37	miRNA: 3' ucCUACUUGGGCGACGUCUCCu 5' **|:|||****||||||||||| target: 5' caGGTGACAAAGCTGCAGAGGa 3'	133	154	-33	0.000285	target: 5' G-ACAAAGCUGCAGAGGAC 3' |*||***|||||||||||* miRNA: 3' CUUGGG-CGACGUCUCCU- 5'	no
lcr-miR-N149	rna-XM_027283264.1	gene-LOC104935786	LOC104935786	ETS-related transcription factor Elf-1, transcript variant X3	1380	1403	161	-24.82	miRNA: 3' uccuACUU--GGGCGACGUCUCCu 5' :***||||**||:|:*|||||||: target: 5' gattTGAAAGCCTGTAGCAGAGGg 3'	1377	1398	-34.2	0.001594	target: 5' UGAAAGCCUGUAGCAGAGGGA 3' |||**:||:|:*|||||||:* miRNA: 3' ACU--UGGGCGACGUCUCCU- 5'	no
lcr-miR-N149	rna-XM_027278200.1	gene-LOC104930405	LOC104930405	protocadherin gamma-C5, transcript variant X13	840	861	165	-30.43	miRNA: 3' ucCUACUUGGGCGA-CGUCUCCu 5' **||*|:|||*|||*|||||||: target: 5' caGA-GGACCGGCTGGCAGAGGg 3'	843	864	-33.2	0.005265	target: 5' GACCGGCUGGCAGAGGGU 3' :|||*|||*|||||||:* miRNA: 3' UUGGGCGA-CGUCUCCU- 5'	no
lcr-miR-N149	rna-XM_010733304.3	gene-atp1b3	atp1b3	ATPase Na+/K+ transporting subunit beta 3	21	42	164	-28.72	miRNA: 3' uccuacUUGGGCGACGUCUCCu 5' |**:**|||||**||||||||* target: 5' aaaggaAACCCAATGCAGAGGc 3'	22	43	-32.4	0.003722	target: 5' -AACCCAAUGCAGAGGC 3' *|||||**||||||||* miRNA: 3' CUUGGGCGACGUCUCCU 5'	no
lcr-miR-N149	rna-XM_027278267.1	gene-LOC104930405	LOC104930405	protocadherin gamma-C5, transcript variant X13	840	861	165	-30.43	miRNA: 3' ucCUACUUGGGCGA-CGUCUCCu 5' **||*|:|||*|||*|||||||: target: 5' caGA-GGACCGGCTGGCAGAGGg 3'	843	864	-33.2	0.005265	target: 5' GACCGGCUGGCAGAGGGU 3' :|||*|||*|||||||:* miRNA: 3' UUGGGCGA-CGUCUCCU- 5'	no
lcr-miR-N149	rna-XM_027278188.1	gene-LOC104930405	LOC104930405	protocadherin gamma-C5, transcript variant X13	840	861	165	-30.43	miRNA: 3' ucCUACUUGGGCGA-CGUCUCCu 5' **||*|:|||*|||*|||||||: target: 5' caGA-GGACCGGCTGGCAGAGGg 3'	843	864	-33.2	0.005265	target: 5' GACCGGCUGGCAGAGGGU 3' :|||*|||*|||||||:* miRNA: 3' UUGGGCGA-CGUCUCCU- 5'	no
lcr-miR-N149	rna-XM_027280070.1	gene-lrch3	lrch3	leucine rich repeats and calponin homology domain containing 3, transcript variant X6	1603	1623	162	-27.16	miRNA: 3' ucCUACUUGGGCGACGUCUCCu 5' :|||*|||**|*|||||||||| target: 5' ggGACGAAGGC-CTGCAGAGGa 3'	1601	1622	-31.4	0.00817	target: 5' GAAGGC-CUGCAGAGGAU 3' |||**|*||||||||||* miRNA: 3' CUUGGGCGACGUCUCCU- 5'	no
lcr-miR-N149	rna-XM_019274653.2	gene-pbx3	pbx3	PBX homeobox 3, transcript variant X6	54	75	160	-24.58	miRNA: 3' ucCUACUUGGGCGACGUCUCCu 5' *||*|||*||**|*|||||||| target: 5' tgGCTGACCCAACAGCAGAGGa 3'	30	51	-30	0.000953	target: 5' UGGACUCUUUUAAAAACCUGGCUGACCCAACAGCAGAGGAU 3' ||:||:|*************|||*********||||||||* miRNA: 3' ACUUGGG-------------CGA---------CGUCUCCU- 5'	no
lcr-miR-N149	rna-XM_027278192.1	gene-LOC104930405	LOC104930405	protocadherin gamma-C5, transcript variant X13	840	861	165	-30.43	miRNA: 3' ucCUACUUGGGCGA-CGUCUCCu 5' **||*|:|||*|||*|||||||: target: 5' caGA-GGACCGGCTGGCAGAGGg 3'	843	864	-33.2	0.005265	target: 5' GACCGGCUGGCAGAGGGU 3' :|||*|||*|||||||:* miRNA: 3' UUGGGCGA-CGUCUCCU- 5'	no
lcr-miR-N149	rna-XM_027280755.1	gene-sptbn4	sptbn4	spectrin beta, non-erythrocytic 4, transcript variant X1	2016	2037	172	-26.83	miRNA: 3' ucCUACUUGGGCGACGUCUCCu 5' :*||*|*:|||*|||||||||* target: 5' gaGAAGCGCCCACTGCAGAGGc 3'	2005	2026	-34.2	0.006184	target: 5' UUUGAGAAGCGCCCACUGCAGAGGC 3' **|||*****:|||*|||||||||* miRNA: 3' --ACU-----UGGGCGACGUCUCCU 5'	no
lcr-miR-N149	rna-XM_010745190.3	gene-LOC104930405	LOC104930405	protocadherin gamma-C5, transcript variant X13	840	861	165	-30.43	miRNA: 3' ucCUACUUGGGCGA-CGUCUCCu 5' **||*|:|||*|||*|||||||: target: 5' caGA-GGACCGGCTGGCAGAGGg 3'	843	864	-33.2	0.005265	target: 5' GACCGGCUGGCAGAGGGU 3' :|||*|||*|||||||:* miRNA: 3' UUGGGCGA-CGUCUCCU- 5'	no
lcr-miR-N149	rna-XM_027288407.1	gene-tpd52l2	tpd52l2	TPD52 like 2, transcript variant X1	2413	2434	168	-25.07	miRNA: 3' uccuacUUGGGCGACGUCUCCu 5' :*****|:||*||||||||||* target: 5' gctcacAGCCAGCTGCAGAGGc 3'	2401	2422	-33	0.006319	target: 5' AGCCCGCUCACAGCCAGCUGCAGAGGC 3' |:|||||***********||||||||* miRNA: 3' UUGGGCG-----------ACGUCUCCU 5'	no
lcr-miR-N149	rna-XM_019255446.2	gene-rps6kb1	rps6kb1	ribosomal protein S6 kinase B1, transcript variant X1	453	475	167	-32.5	miRNA: 3' ucCUACUUGGG-CGACGUCUCCu 5' *||:*|||::|*|:||||||||: target: 5' tgGGAGAATTCGGTTGCAGAGGg 3'	453	474	-34.5	0.002873	target: 5' GAAUUCGGUUGCAGAGGGG 3' |||::|*|:||||||||:* miRNA: 3' CUUGGG-CGACGUCUCCU- 5'	no
lcr-miR-N149	rna-XM_019263899.2	gene-LOC104930405	LOC104930405	protocadherin gamma-C5, transcript variant X13	840	861	165	-30.43	miRNA: 3' ucCUACUUGGGCGA-CGUCUCCu 5' **||*|:|||*|||*|||||||: target: 5' caGA-GGACCGGCTGGCAGAGGg 3'	843	864	-33.2	0.005265	target: 5' GACCGGCUGGCAGAGGGU 3' :|||*|||*|||||||:* miRNA: 3' UUGGGCGA-CGUCUCCU- 5'	no
lcr-miR-N149	rna-XM_027285301.1	gene-LOC109136703	LOC109136703	neurabin-1, transcript variant X6	179	199	160	-26.37	miRNA: 3' uccuACUUGGGCGACGUCUCCu 5' ****||:|||:|**|||||||* target: 5' tcttTGGACCTG-AGCAGAGGt 3'	182	203	-29.8	0.007615	target: 5' GACCUGA-GCAGAGGU 3' :|||:|**|||||||* miRNA: 3' UUGGGCGACGUCUCCU 5'	no
lcr-miR-N149	rna-XM_019255601.2	gene-LOC104940462	LOC104940462	genetic suppressor element 1, transcript variant X1	640	661	160	-22.46	miRNA: 3' ucCUACUUGGGCGACGUCUCCu 5' **|:|*||**:*|||||||||| target: 5' ctGGTAAAGGTTCTGCAGAGGa 3'	620	641	-31.6	0.006639	target: 5' AAGUUGUUUGUGUGCUGGUAAAGGUUCUGCAGAGGAU 3' |************:|:*|:********|||||||||* miRNA: 3' U------------UGGGCG--------ACGUCUCCU- 5'	no
lcr-miR-N149	rna-XM_010751525.3	gene-LOC104935658	LOC104935658	cytochrome b5 reductase 4	331	353	161	-24.86	miRNA: 3' uccuACUU-GGGCGACGUCUCCu 5' :***||||*:*:|:||||||||| target: 5' gcttTGAAGTGTGTTGCAGAGGa 3'	317	338	-33.8	0.000228	target: 5' UCCCAUGAGCUUUGAAGUGUGUUGCAGAGGAU 3' *****|||:|:********:|:|||||||||* miRNA: 3' -----ACUUGG--------GCGACGUCUCCU- 5'	no
lcr-miR-N149	rna-XM_010748995.3	gene-rps6kb1	rps6kb1	ribosomal protein S6 kinase B1, transcript variant X1	453	475	167	-32.5	miRNA: 3' ucCUACUUGGG-CGACGUCUCCu 5' *||:*|||::|*|:||||||||: target: 5' tgGGAGAATTCGGTTGCAGAGGg 3'	453	474	-34.5	0.002873	target: 5' GAAUUCGGUUGCAGAGGGG 3' |||::|*|:||||||||:* miRNA: 3' CUUGGG-CGACGUCUCCU- 5'	no
lcr-miR-N149	rna-XM_019259925.2	gene-golm1	golm1	golgi membrane protein 1, transcript variant X2	1197	1218	161	-28.62	miRNA: 3' uccuaCUUGGGCGACGUCUCCu 5' :|*:*|:::|:||*|||||||* target: 5' ggaggGGGTCTGCAGCAGAGGc 3'	1195	1216	-33.4	0.007375	target: 5' GGGUCUGCAGCAGAGGC 3' |:::|:||*|||||||* miRNA: 3' CUUGGGCGACGUCUCCU 5'	no
lcr-miR-N149	rna-XM_010730864.3	gene-prr7	prr7	proline rich 7, synaptic	183	204	168	-29.3	miRNA: 3' ucCUACUUGGGCGACGUCUCCu 5' |||:|*||**:||||||||||* target: 5' agGGTTAAAGTGCTGCAGAGGc 3'	182	203	-31.9	0.007046	target: 5' UAAAGUGCUGCAGAGGC 3' *||**:||||||||||* miRNA: 3' CUUGGGCGACGUCUCCU 5'	no
lcr-miR-N149	rna-XM_027278244.1	gene-LOC104930405	LOC104930405	protocadherin gamma-C5, transcript variant X13	840	861	165	-30.43	miRNA: 3' ucCUACUUGGGCGA-CGUCUCCu 5' **||*|:|||*|||*|||||||: target: 5' caGA-GGACCGGCTGGCAGAGGg 3'	843	864	-33.2	0.005265	target: 5' GACCGGCUGGCAGAGGGU 3' :|||*|||*|||||||:* miRNA: 3' UUGGGCGA-CGUCUCCU- 5'	no
lcr-miR-N149	rna-XM_027287844.1	gene-LOC104931914	LOC104931914	cadherin-12, transcript variant X2	149	171	163	-28.53	miRNA: 3' ucCUACUUGGGC-GACGUCUCCu 5' **|*|*|:||||**||||||||| target: 5' ctGTTTAGCCCGAGTGCAGAGGa 3'	145	166	-34.1	5.4e-05	target: 5' GUUUAGCCCGAGUGCAGAGGAU 3' |***|:||||**|||||||||* miRNA: 3' C---UUGGGCG-ACGUCUCCU- 5'	no
lcr-miR-N149	rna-XM_027283048.1	gene-LOC104921153	LOC104921153	axin-1, transcript variant X1	314	335	160	-29.01	miRNA: 3' ucCUACUUGGGCGACGUCUCCu 5' **||||||*|||**||:||||| target: 5' caGATGAAACCGGAGCGGAGGa 3'	315	336	-35	0.00349	target: 5' AAACCGGAGCGGAGGAA 3' ||*|||**||:|||||* miRNA: 3' UUGGGCGACGUCUCCU- 5'	no
lcr-miR-N149	rna-XM_010737821.3	gene-LOC104924474	LOC104924474	V-type proton ATPase subunit d 1	235	259	162	-26.76	miRNA: 3' uccUACUUGGGC---GACGUCUCCu 5' ***||||:||:|***|*|||||||* target: 5' cacATGAGCCTGATCCAGCAGAGGt 3'	224	245	-30.4	0.006311	target: 5' AGAAUCACAUGAGCCUGAUCCAGCAGAGGU 3' *********|||:||:|*|***|||||||* miRNA: 3' ---------ACUUGGGCGA---CGUCUCCU 5'	no
lcr-miR-N149	rna-XM_019260394.2	gene-wac	wac	WW domain containing adaptor with coiled-coil	519	541	165	-27.97	miRNA: 3' uccuACUUGGGCG-ACGUCUCCu 5' ****||||||*||**|||||||| target: 5' tcacTGAACCGGCGAGCAGAGGa 3'	515	536	-36.8	0.000559	target: 5' ACUGAACCGGCGAGCAGAGGAG 3' **||||||*||**||||||||* miRNA: 3' --ACUUGGGCGA-CGUCUCCU- 5'	no
lcr-miR-N149	rna-XM_019264786.2	gene-dnmbp	dnmbp	dynamin binding protein, transcript variant X1	595	616	162	-20.55	miRNA: 3' uccuACUUGGGCGACGUCUCCu 5' :***||||*:**|||||||||* target: 5' gtttTGAAGTGTCTGCAGAGGc 3'	570	591	-29.3	0.008713	target: 5' GAUUAUCUACUGGUUGCUAGUUUUGAAGUGUCUGCAGAGGC 3' ||*************:|:**********:|*|||||||||* miRNA: 3' CU-------------UGG----------GC-GACGUCUCCU 5'	no
lcr-miR-N149	rna-XM_019255748.2	gene-gpr45	gpr45	G protein-coupled receptor 45, transcript variant X2	201	224	163	-26.66	miRNA: 3' ucCUACUUGGG--CGACGUCUCCu 5' **||**|||||***|||||||||| target: 5' ttGAACAACCCCATCTGCAGAGGa 3'	201	222	-31.4	0.005166	target: 5' AACAACCCCAUCUGCAGAGGAA 3' |***||||***||||||||||* miRNA: 3' U---UGGGC--GACGUCUCCU- 5'	no
lcr-miR-N149	rna-XM_010730508.3	gene-LOC104918680	LOC104918680	dedicator of cytokinesis protein 7, transcript variant X2	777	797	165	-26.65	miRNA: 3' uccUACUUGGGCGACGUCUCCu 5' :**|||:|*::|:||||||||: target: 5' gaaATGGA-TTGTTGCAGAGGg 3'	774	795	-32.6	0.002622	target: 5' AUGGA-UUGUUGCAGAGGGA 3' *||:|*::|:||||||||:* miRNA: 3' -ACUUGGGCGACGUCUCCU- 5'	no
lcr-miR-N149	rna-XM_027278262.1	gene-LOC104930405	LOC104930405	protocadherin gamma-C5, transcript variant X13	840	861	165	-30.43	miRNA: 3' ucCUACUUGGGCGA-CGUCUCCu 5' **||*|:|||*|||*|||||||: target: 5' caGA-GGACCGGCTGGCAGAGGg 3'	843	864	-33.2	0.005265	target: 5' GACCGGCUGGCAGAGGGU 3' :|||*|||*|||||||:* miRNA: 3' UUGGGCGA-CGUCUCCU- 5'	no
lcr-miR-N149	rna-XM_010736152.3	gene-tfap2a	tfap2a	transcription factor AP-2 alpha, transcript variant X5	327	348	160	-26.01	miRNA: 3' ucCUACUUGGGCGACGUCUCCu 5' |*||**||***||||||||||| target: 5' aaGAGAAAAAAGCTGCAGAGGa 3'	330	351	-30.4	0.001848	target: 5' AAAAAAGCUGCAGAGGAA 3' ||****|||||||||||* miRNA: 3' UUGGG-CGACGUCUCCU- 5'	no
lcr-miR-N149	rna-XM_010757077.3	gene-LOC104940465	LOC104940465	hypoxanthine-guanine phosphoribosyltransferase-like	2	22	174	-32.76	miRNA: 3' ucCUACUUGGGCGACGUCUCCu 5' *|||||||**:||||||||||* target: 5' tgGATGAA-GTGCTGCAGAGGt 3'	2	23	-35.1	0.000166	target: 5' AAGU-GCUGCAGAGGU 3' ||*:*||||||||||* miRNA: 3' UUGGGCGACGUCUCCU 5'	no
lcr-miR-N149	rna-XM_027278216.1	gene-LOC104930405	LOC104930405	protocadherin gamma-C5, transcript variant X13	840	861	165	-30.43	miRNA: 3' ucCUACUUGGGCGA-CGUCUCCu 5' **||*|:|||*|||*|||||||: target: 5' caGA-GGACCGGCTGGCAGAGGg 3'	843	864	-33.2	0.005265	target: 5' GACCGGCUGGCAGAGGGU 3' :|||*|||*|||||||:* miRNA: 3' UUGGGCGA-CGUCUCCU- 5'	no
lcr-miR-N149	rna-XM_027290489.1	gene-slc39a3	slc39a3	solute carrier family 39 member 3, transcript variant X4	83	103	174	-31.81	miRNA: 3' ucCUACUUGGGCGACGUCUCCu 5' *|||*||||:|*|||||||||* target: 5' tgGACGAACTC-CTGCAGAGGt 3'	83	104	-34.7	2.5e-05	target: 5' AACUC-CUGCAGAGGU 3' |||:|*|||||||||* miRNA: 3' UUGGGCGACGUCUCCU 5'	no
lcr-miR-N149	rna-XM_027278794.1	gene-ipo9	ipo9	importin 9	125	144	160	-27.02	miRNA: 3' uccUACUUGGGCGACGUCUCCu 5' |**|||::||:|**|||||||| target: 5' atcATGGGCCTG--GCAGAGGa 3'	121	142	-34	0.00056	target: 5' CAUGGGCCUG--GCAGAGGAA 3' **||::||:|**||||||||* miRNA: 3' --ACUUGGGCGACGUCUCCU- 5'	no
lcr-miR-N149	rna-XM_027281637.1	gene-LOC104930384	LOC104930384	flocculation protein FLO11	69	90	160	-28.44	miRNA: 3' ucCUACUUGGGCGACGUCUCCu 5' |||:||||*:*|**|||||||: target: 5' agGGTGAAATGGGGGCAGAGGg 3'	68	89	-31.9	0.00043	target: 5' GAAAUGGGGGCAGAGGGG 3' |||*:*|**|||||||:* miRNA: 3' CUUGGGCGACGUCUCCU- 5'	no
lcr-miR-N149	rna-XM_019274076.2	gene-pi4kb	pi4kb	phosphatidylinositol 4-kinase beta, transcript variant X1	2160	2180	164	-30.33	miRNA: 3' ucCU-ACUUGGGCGACGUCUCCu 5' *|||*||||||:|**|||||||: target: 5' cgGACTGAACCTG--GCAGAGGg 3'	2158	2179	-33.6	0.004343	target: 5' GAACCUG--GCAGAGGGU 3' |||||:|**|||||||:* miRNA: 3' CUUGGGCGACGUCUCCU- 5'	no
lcr-miR-N149	rna-XM_010741877.3	gene-LOC104927735	LOC104927735	PRA1 family protein 3	18	40	163	-27.48	miRNA: 3' ucCUACUUGGGCG-ACGUCUCCu 5' ||||||||***|:*||||||||* target: 5' agGATGAAGAAGTGTGCAGAGGt 3'	17	38	-30.6	0.001509	target: 5' GAAGAAGUGUGCAGAGGU 3' |||***|:*||||||||* miRNA: 3' CUUGGGCG-ACGUCUCCU 5'	no
lcr-miR-N149	rna-XM_027289384.1	gene-mta3	mta3	metastasis associated 1 family member 3, transcript variant X2	1105	1126	167	-29.44	miRNA: 3' uccUACUUGGGCGACGUCUCCu 5' ***||***||:||||||||||: target: 5' tctATCTCCCTGCTGCAGAGGg 3'	1111	1132	-32.8	0.002677	target: 5' -CCCUGCUGCAGAGGGU 3' **||:||||||||||:* miRNA: 3' UUGGGCGACGUCUCCU- 5'	no
lcr-miR-N149	rna-XM_019263903.2	gene-LOC104930405	LOC104930405	protocadherin gamma-C5, transcript variant X13	840	861	165	-30.43	miRNA: 3' ucCUACUUGGGCGA-CGUCUCCu 5' **||*|:|||*|||*|||||||: target: 5' caGA-GGACCGGCTGGCAGAGGg 3'	843	864	-33.2	0.005265	target: 5' GACCGGCUGGCAGAGGGU 3' :|||*|||*|||||||:* miRNA: 3' UUGGGCGA-CGUCUCCU- 5'	no
lcr-miR-N149	rna-XM_027278195.1	gene-LOC104930405	LOC104930405	protocadherin gamma-C5, transcript variant X13	840	861	165	-30.43	miRNA: 3' ucCUACUUGGGCGA-CGUCUCCu 5' **||*|:|||*|||*|||||||: target: 5' caGA-GGACCGGCTGGCAGAGGg 3'	843	864	-33.2	0.005265	target: 5' GACCGGCUGGCAGAGGGU 3' :|||*|||*|||||||:* miRNA: 3' UUGGGCGA-CGUCUCCU- 5'	no
lcr-miR-N149	rna-XM_027281983.1	gene-LOC104925547	LOC104925547	muscleblind-like protein 3, transcript variant X2	634	656	162	-25.53	miRNA: 3' uccUACUUGGG-CGACGUCUCCu 5' ***||**|::|*||||||||||| target: 5' tttATCTATTCAGCTGCAGAGGa 3'	631	652	-29.9	0.004867	target: 5' UAUCUAUUCAGCUGCAGAGGAG 3' *|:|:*****|||||||||||* miRNA: 3' UUGGG-----CGACGUCUCCU- 5'	no
lcr-miR-N149	rna-XM_019265245.2	gene-ror1	ror1	receptor tyrosine kinase like orphan receptor 1, transcript variant X1	1156	1177	164	-27.07	miRNA: 3' uccuacUUGGGCGACGUCUCCu 5' ***|**|:|:*||||||||||| target: 5' ttcaaaAGCTGGCTGCAGAGGa 3'	1160	1181	-32.5	0.009465	target: 5' AGCUGGCUGCAGAGGAC 3' |:|:*|||||||||||* miRNA: 3' UUGGGCGACGUCUCCU- 5'	no
lcr-miR-N149	rna-XM_019253881.2	gene-acsf3	acsf3	acyl-CoA synthetase family member 3, transcript variant X2	149	171	167	-28.9	miRNA: 3' uccuacUUG-GGCGACGUCUCCu 5' |**|**|||*|:||||||||||| target: 5' atcacaAACACTGCTGCAGAGGa 3'	133	154	-38.2	0.00015	target: 5' AACACCUCCCAUCACAAACACUGCUGCAGAGGAA 3' |**|||:***************|||||||||||* miRNA: 3' U--UGGG---------------CGACGUCUCCU- 5'	no
lcr-miR-N149	rna-XM_019274219.2	gene-LOC104931914	LOC104931914	cadherin-12, transcript variant X2	149	171	163	-28.53	miRNA: 3' ucCUACUUGGGC-GACGUCUCCu 5' **|*|*|:||||**||||||||| target: 5' ctGTTTAGCCCGAGTGCAGAGGa 3'	145	166	-34.1	5.4e-05	target: 5' GUUUAGCCCGAGUGCAGAGGAU 3' |***|:||||**|||||||||* miRNA: 3' C---UUGGGCG-ACGUCUCCU- 5'	no
lcr-miR-N149	rna-XM_019259155.2	gene-vash2	vash2	vasohibin 2	607	627	170	-30.69	miRNA: 3' ucCUACUUGGGCGACGUCUCCu 5' :*||*|:||:|*|||||||||| target: 5' gaGA-GGACTCACTGCAGAGGa 3'	601	622	-33.8	0.009199	target: 5' GAGAGGACUCACUGCAGAGGAU 3' ****|:||:|*||||||||||* miRNA: 3' ----CUUGGGCGACGUCUCCU- 5'	no
lcr-miR-N149	rna-XM_027278224.1	gene-LOC104930405	LOC104930405	protocadherin gamma-C5, transcript variant X13	840	861	165	-30.43	miRNA: 3' ucCUACUUGGGCGA-CGUCUCCu 5' **||*|:|||*|||*|||||||: target: 5' caGA-GGACCGGCTGGCAGAGGg 3'	843	864	-33.2	0.005265	target: 5' GACCGGCUGGCAGAGGGU 3' :|||*|||*|||||||:* miRNA: 3' UUGGGCGA-CGUCUCCU- 5'	no
lcr-miR-N149	rna-XM_019274650.2	gene-pbx3	pbx3	PBX homeobox 3, transcript variant X6	54	75	160	-24.58	miRNA: 3' ucCUACUUGGGCGACGUCUCCu 5' *||*|||*||**|*|||||||| target: 5' tgGCTGACCCAACAGCAGAGGa 3'	30	51	-30	0.000953	target: 5' UGGACUCUUUUAAAAACCUGGCUGACCCAACAGCAGAGGAU 3' ||:||:|*************|||*********||||||||* miRNA: 3' ACUUGGG-------------CGA---------CGUCUCCU- 5'	no
lcr-miR-N149	rna-XM_027285297.1	gene-LOC109136703	LOC109136703	neurabin-1, transcript variant X6	179	199	160	-26.37	miRNA: 3' uccuACUUGGGCGACGUCUCCu 5' ****||:|||:|**|||||||* target: 5' tcttTGGACCTG-AGCAGAGGt 3'	182	203	-29.8	0.007615	target: 5' GACCUGA-GCAGAGGU 3' :|||:|**|||||||* miRNA: 3' UUGGGCGACGUCUCCU 5'	no
lcr-miR-N149	rna-XM_027288409.1	gene-tpd52l2	tpd52l2	TPD52 like 2, transcript variant X1	2413	2434	168	-25.07	miRNA: 3' uccuacUUGGGCGACGUCUCCu 5' :*****|:||*||||||||||* target: 5' gctcacAGCCAGCTGCAGAGGc 3'	2401	2422	-33	0.006319	target: 5' AGCCCGCUCACAGCCAGCUGCAGAGGC 3' |:|||||***********||||||||* miRNA: 3' UUGGGCG-----------ACGUCUCCU 5'	no
lcr-miR-N149	rna-XM_019253035.2	gene-tfap2a	tfap2a	transcription factor AP-2 alpha, transcript variant X5	327	348	160	-26.01	miRNA: 3' ucCUACUUGGGCGACGUCUCCu 5' |*||**||***||||||||||| target: 5' aaGAGAAAAAAGCTGCAGAGGa 3'	330	351	-30.4	0.001848	target: 5' AAAAAAGCUGCAGAGGAA 3' ||****|||||||||||* miRNA: 3' UUGGG-CGACGUCUCCU- 5'	no
lcr-miR-N149	rna-XM_027290488.1	gene-slc39a3	slc39a3	solute carrier family 39 member 3, transcript variant X4	83	103	174	-31.81	miRNA: 3' ucCUACUUGGGCGACGUCUCCu 5' *|||*||||:|*|||||||||* target: 5' tgGACGAACTC-CTGCAGAGGt 3'	83	104	-34.7	2.5e-05	target: 5' AACUC-CUGCAGAGGU 3' |||:|*|||||||||* miRNA: 3' UUGGGCGACGUCUCCU 5'	no
lcr-miR-N149	rna-XM_010735718.3	gene-acsf3	acsf3	acyl-CoA synthetase family member 3, transcript variant X2	149	171	167	-28.9	miRNA: 3' uccuacUUG-GGCGACGUCUCCu 5' |**|**|||*|:||||||||||| target: 5' atcacaAACACTGCTGCAGAGGa 3'	133	154	-38.2	0.00015	target: 5' AACACCUCCCAUCACAAACACUGCUGCAGAGGAA 3' |**|||:***************|||||||||||* miRNA: 3' U--UGGG---------------CGACGUCUCCU- 5'	no
lcr-miR-N149	rna-XM_027274624.1	gene-mta1	mta1	metastasis associated 1, transcript variant X5	642	663	166	-28.16	miRNA: 3' uccuacuuGGGCGACGUCUCCu 5' :****|**|:|||||||||||* target: 5' gctcagtcCTCGCTGCAGAGGc 3'	639	660	-32.2	0.004856	target: 5' CAGUCCUCGCUGCAGAGGC 3' **|**|:|||||||||||* miRNA: 3' --CUUGGGCGACGUCUCCU 5'	no
lcr-miR-N149	rna-XM_027278207.1	gene-LOC104930405	LOC104930405	protocadherin gamma-C5, transcript variant X13	840	861	165	-30.43	miRNA: 3' ucCUACUUGGGCGA-CGUCUCCu 5' **||*|:|||*|||*|||||||: target: 5' caGA-GGACCGGCTGGCAGAGGg 3'	843	864	-33.2	0.005265	target: 5' GACCGGCUGGCAGAGGGU 3' :|||*|||*|||||||:* miRNA: 3' UUGGGCGA-CGUCUCCU- 5'	no
lcr-miR-N149	rna-XM_019271835.2	gene-camsap1	camsap1	calmodulin regulated spectrin associated protein 1, transcript variant X1	106	129	163	-27.32	miRNA: 3' uccuacUUGGGCGA--CGUCUCCu 5' :**:**||||:|||**|||||||* target: 5' gctggaAACCTGCTCGGCAGAGGc 3'	102	123	-33.1	0.004386	target: 5' UGGAAACCUGCUCGGCAGAGGC 3' ||:**|||:|||**|||||||* miRNA: 3' ACU--UGGGCGA--CGUCUCCU 5'	no
lcr-miR-N149	rna-XM_027278302.1	gene-LOC104930405	LOC104930405	protocadherin gamma-C5, transcript variant X13	840	861	165	-30.43	miRNA: 3' ucCUACUUGGGCGA-CGUCUCCu 5' **||*|:|||*|||*|||||||: target: 5' caGA-GGACCGGCTGGCAGAGGg 3'	843	864	-33.2	0.005265	target: 5' GACCGGCUGGCAGAGGGU 3' :|||*|||*|||||||:* miRNA: 3' UUGGGCGA-CGUCUCCU- 5'	no
lcr-miR-N149	rna-XM_027283100.1	gene-rab11fip4	rab11fip4	RAB11 family interacting protein 4, transcript variant X2	1	18	161	-27.34	miRNA: 3' uccuacuugGGCGACGUCUCCu 5' *****|***|:||||||||||| target: 5' ----agctgCTGCTGCAGAGGa 3'	5	26	-31	0.004646	target: 5' --GCUGCUGCAGAGGAU 3' ***|:|||||||||||* miRNA: 3' UUGGGCGACGUCUCCU- 5'	no
lcr-miR-N149	rna-XM_027286604.1	gene-pi4kb	pi4kb	phosphatidylinositol 4-kinase beta, transcript variant X1	2160	2180	164	-30.33	miRNA: 3' ucCU-ACUUGGGCGACGUCUCCu 5' *|||*||||||:|**|||||||: target: 5' cgGACTGAACCTG--GCAGAGGg 3'	2158	2179	-33.6	0.004343	target: 5' GAACCUG--GCAGAGGGU 3' |||||:|**|||||||:* miRNA: 3' CUUGGGCGACGUCUCCU- 5'	no
lcr-miR-N149	rna-XM_027274690.1	gene-ralgapa2	ralgapa2	Ral GTPase activating protein catalytic alpha subunit 2, transcript variant X4	552	572	172	-29.12	miRNA: 3' uccuACUUGGGCGACGUCUCCu 5' *|**||||*|:||||||||||: target: 5' tgttTGAA-CTGCTGCAGAGGg 3'	555	576	-33.4	0.004348	target: 5' AA-CUGCUGCAGAGGGG 3' ||*|:||||||||||:* miRNA: 3' UUGGGCGACGUCUCCU- 5'	no
lcr-miR-N149	rna-XM_027288404.1	gene-tpd52l2	tpd52l2	TPD52 like 2, transcript variant X1	2413	2434	168	-25.07	miRNA: 3' uccuacUUGGGCGACGUCUCCu 5' :*****|:||*||||||||||* target: 5' gctcacAGCCAGCTGCAGAGGc 3'	2401	2422	-33	0.006319	target: 5' AGCCCGCUCACAGCCAGCUGCAGAGGC 3' |:|||||***********||||||||* miRNA: 3' UUGGGCG-----------ACGUCUCCU 5'	no
lcr-miR-N149	rna-XM_010736090.3	gene-col11a1	col11a1	collagen type XI alpha 1 chain, transcript variant X2	250	271	170	-26.9	miRNA: 3' uccuACUUGGGCGACGUCUCCu 5' ****|||||*||:*|||||||| target: 5' cattTGAACGCGTGGCAGAGGa 3'	245	266	-35.9	0.000417	target: 5' AUUUGAACGCGUGGCAGAGGAG 3' ***|||||*||:*||||||||* miRNA: 3' ---ACUUGGGCGACGUCUCCU- 5'	no
lcr-miR-N149	rna-XM_027285298.1	gene-LOC109136703	LOC109136703	neurabin-1, transcript variant X6	179	199	160	-26.37	miRNA: 3' uccuACUUGGGCGACGUCUCCu 5' ****||:|||:|**|||||||* target: 5' tcttTGGACCTG-AGCAGAGGt 3'	182	203	-29.8	0.007615	target: 5' GACCUGA-GCAGAGGU 3' :|||:|**|||||||* miRNA: 3' UUGGGCGACGUCUCCU 5'	no
lcr-miR-N149	rna-XM_027278184.1	gene-LOC104930405	LOC104930405	protocadherin gamma-C5, transcript variant X13	840	861	165	-30.43	miRNA: 3' ucCUACUUGGGCGA-CGUCUCCu 5' **||*|:|||*|||*|||||||: target: 5' caGA-GGACCGGCTGGCAGAGGg 3'	843	864	-33.2	0.005265	target: 5' GACCGGCUGGCAGAGGGU 3' :|||*|||*|||||||:* miRNA: 3' UUGGGCGA-CGUCUCCU- 5'	no
lcr-miR-N149	rna-XM_027278286.1	gene-LOC104930405	LOC104930405	protocadherin gamma-C5, transcript variant X13	840	861	165	-30.43	miRNA: 3' ucCUACUUGGGCGA-CGUCUCCu 5' **||*|:|||*|||*|||||||: target: 5' caGA-GGACCGGCTGGCAGAGGg 3'	843	864	-33.2	0.005265	target: 5' GACCGGCUGGCAGAGGGU 3' :|||*|||*|||||||:* miRNA: 3' UUGGGCGA-CGUCUCCU- 5'	no
lcr-miR-N149	rna-XM_019270268.2	gene-LOC104918489	LOC104918489	zinc finger protein GLIS1, transcript variant X2	1687	1708	172	-27.49	miRNA: 3' uccuacUUGGGCGACGUCUCCu 5' ***:**|||||||*|||||||* target: 5' tttgcaAACCCGCAGCAGAGGc 3'	1683	1704	-31.9	0.00682	target: 5' GCAAACCCGCAGCAGAGGC 3' |**|||||||*|||||||* miRNA: 3' C--UUGGGCGACGUCUCCU 5'	no
lcr-miR-N149	rna-XM_010735838.3	gene-LOC104922886	LOC104922886	atrial natriuretic peptide receptor 2, transcript variant X1	95	116	164	-30.36	miRNA: 3' ucCUACUUGGGCGACGUCUCCu 5' **|:|||*::|**||||||||| target: 5' ttGGTGATTTCCGTGCAGAGGa 3'	411	432	-28.3	0.006029	target: 5' AUUUCCG-UGCAGAGGAA 3' |**:|||*|||||||||* miRNA: 3' UU-GGGCGACGUCUCCU- 5'	no
lcr-miR-N149	rna-XM_027285649.1	gene-LOC104921308	LOC104921308	major facilitator superfamily domain-containing protein 8-like	69	90	164	-27.94	miRNA: 3' uccuacUUGGGCGACGUCUCCu 5' |**|**|::::||||||||||| target: 5' aatacaAGTTTGCTGCAGAGGa 3'	40	61	-32.5	0.001105	target: 5' UGCCCUGCACUUCUGAAAGAAUCAAUACAAGUUUGCUGCAGAGGAU 3' *************||||**************:::|||||||||||* miRNA: 3' -------------ACUU--------------GGGCGACGUCUCCU- 5'	no
lcr-miR-N149	rna-XM_010744214.3	gene-LOC104929611	LOC104929611	pyroglutamylated RF-amide peptide receptor	1317	1338	162	-27.14	miRNA: 3' uccuacuuGGGCGACGUCUCCu 5' **|*|***:|:||||||||||: target: 5' tagttaccTCTGCTGCAGAGGg 3'	1323	1344	-30.8	0.008268	target: 5' -CUCUGCUGCAGAGGGU 3' **:|:||||||||||:* miRNA: 3' UUGGGCGACGUCUCCU- 5'	no
lcr-miR-N149	rna-XM_027278202.1	gene-LOC104930405	LOC104930405	protocadherin gamma-C5, transcript variant X13	840	861	165	-30.43	miRNA: 3' ucCUACUUGGGCGA-CGUCUCCu 5' **||*|:|||*|||*|||||||: target: 5' caGA-GGACCGGCTGGCAGAGGg 3'	843	864	-33.2	0.005265	target: 5' GACCGGCUGGCAGAGGGU 3' :|||*|||*|||||||:* miRNA: 3' UUGGGCGA-CGUCUCCU- 5'	no
lcr-miR-N149	rna-XM_027273064.1	gene-plcz1	plcz1	phospholipase C zeta 1, transcript variant X1	164	188	161	-26.83	miRNA: 3' uccuACUUGG---GCGACGUCUCCu 5' *|**||*||:***|||||||||||| target: 5' tgccTGCACTGTGCGCTGCAGAGGa 3'	167	188	-31.4	0.001525	target: 5' CACUGUGCGCUGCAGAGGAA 3' *||:***||||||||||||* miRNA: 3' UUGG---GCGACGUCUCCU- 5'	no
lcr-miR-N149	rna-XM_010755232.3	gene-dmrt3	dmrt3	doublesex and mab-3 related transcription factor 3	12	35	171	-29.95	miRNA: 3' ucCUACUUGG--GCGACGUCUCCu 5' |*||||:||:**|||*|||||||| target: 5' atGATGGACTAACGCAGCAGAGGa 3'	13	34	-34.4	8e-05	target: 5' GACUAACGCAGCAGAGGAC 3' :||:**|||*||||||||* miRNA: 3' UUGG--GCGACGUCUCCU- 5'	no
lcr-miR-N149	rna-XM_027278247.1	gene-LOC104930405	LOC104930405	protocadherin gamma-C5, transcript variant X13	840	861	165	-30.43	miRNA: 3' ucCUACUUGGGCGA-CGUCUCCu 5' **||*|:|||*|||*|||||||: target: 5' caGA-GGACCGGCTGGCAGAGGg 3'	843	864	-33.2	0.005265	target: 5' GACCGGCUGGCAGAGGGU 3' :|||*|||*|||||||:* miRNA: 3' UUGGGCGA-CGUCUCCU- 5'	no
lcr-miR-N149	rna-XM_019264785.2	gene-dnmbp	dnmbp	dynamin binding protein, transcript variant X1	595	616	162	-20.55	miRNA: 3' uccuACUUGGGCGACGUCUCCu 5' :***||||*:**|||||||||* target: 5' gtttTGAAGTGTCTGCAGAGGc 3'	570	591	-29.3	0.008713	target: 5' GAUUAUCUACUGGUUGCUAGUUUUGAAGUGUCUGCAGAGGC 3' ||*************:|:**********:|*|||||||||* miRNA: 3' CU-------------UGG----------GC-GACGUCUCCU 5'	no
lcr-miR-N149	rna-XM_027280757.1	gene-sptbn4	sptbn4	spectrin beta, non-erythrocytic 4, transcript variant X1	2016	2037	172	-26.83	miRNA: 3' ucCUACUUGGGCGACGUCUCCu 5' :*||*|*:|||*|||||||||* target: 5' gaGAAGCGCCCACTGCAGAGGc 3'	2005	2026	-34.2	0.006184	target: 5' UUUGAGAAGCGCCCACUGCAGAGGC 3' **|||*****:|||*|||||||||* miRNA: 3' --ACU-----UGGGCGACGUCUCCU 5'	no
lcr-miR-N149	rna-XM_010753145.3	gene-thap1	thap1	THAP domain containing 1	485	506	164	-26.52	miRNA: 3' uccuacUUGGGCGACGUCUCCu 5' ******|||**||||||||||: target: 5' tcaccaAACAAGCTGCAGAGGg 3'	479	500	-36.6	0.000317	target: 5' UCACCAAACAAGCUGCAGAGGGU 3' **|||******||||||||||:* miRNA: 3' CUUGGG-----CGACGUCUCCU- 5'	no
lcr-miR-N149	rna-XM_027278227.1	gene-LOC104930405	LOC104930405	protocadherin gamma-C5, transcript variant X13	840	861	165	-30.43	miRNA: 3' ucCUACUUGGGCGA-CGUCUCCu 5' **||*|:|||*|||*|||||||: target: 5' caGA-GGACCGGCTGGCAGAGGg 3'	843	864	-33.2	0.005265	target: 5' GACCGGCUGGCAGAGGGU 3' :|||*|||*|||||||:* miRNA: 3' UUGGGCGA-CGUCUCCU- 5'	no
lcr-miR-N149	rna-XM_010756871.3	gene-LOC104940300	LOC104940300	brain-specific angiogenesis inhibitor 1-associated protein 2, transcript variant X2	1769	1790	164	-30.54	miRNA: 3' ucCUACUUGGGCGACGUCUCCu 5' :*|:*||:|::|:*|||||||* target: 5' gaGGAGAGCTTGTAGCAGAGGt 3'	1768	1789	-33.6	0.003603	target: 5' GAGCUUGUAGCAGAGGU 3' ||:|::|:*|||||||* miRNA: 3' CUUGGGCGACGUCUCCU 5'	no
lcr-miR-N149	rna-XM_019257265.2	gene-LOC104935786	LOC104935786	ETS-related transcription factor Elf-1, transcript variant X3	1380	1403	161	-24.82	miRNA: 3' uccuACUU--GGGCGACGUCUCCu 5' :***||||**||:|:*|||||||: target: 5' gattTGAAAGCCTGTAGCAGAGGg 3'	1377	1398	-34.2	0.001594	target: 5' UGAAAGCCUGUAGCAGAGGGA 3' |||**:||:|:*|||||||:* miRNA: 3' ACU--UGGGCGACGUCUCCU- 5'	no
lcr-miR-N149	rna-XM_027283448.1	gene-LOC104929964	LOC104929964	suppressor of cytokine signaling 1	757	777	161	-26.62	miRNA: 3' uccUACUUGGGCGACGUCUCCu 5' ***:||*||**||||||||||: target: 5' taaGTG-ACAGGCTGCAGAGGg 3'	759	780	-30	0.007167	target: 5' -ACAGGCUGCAGAGGGA 3' *||**||||||||||:* miRNA: 3' UUGGGCGACGUCUCCU- 5'	no
lcr-miR-N149	rna-XM_010738334.3	gene-LOC104924859	LOC104924859	hypothetical protein	4946	4967	164	-31.98	miRNA: 3' ucCUACUUGGGCGACGUCUCCu 5' **|:|***:|:||||||||||| target: 5' caGGTTCTTCTGCTGCAGAGGa 3'	4942	4963	-34.9	0.008346	target: 5' CU-UCUGCUGCAGAGGAG 3' ***:|:|||||||||||* miRNA: 3' CUUGGGCGACGUCUCCU- 5'	no
lcr-miR-N149	rna-XM_010753749.3	gene-LOC104937512	LOC104937512	D(1)-like dopamine receptor	1416	1436	170	-29.42	miRNA: 3' ucCUACUUGGGCGACGUCUCCu 5' **|:||||*|:|*||||||||: target: 5' ctGGTGAAGCTG-TGCAGAGGg 3'	1416	1437	-31.6	0.007194	target: 5' AAGCUG-UGCAGAGGGU 3' ||*|:|*||||||||:* miRNA: 3' UUGGGCGACGUCUCCU- 5'	no
lcr-miR-N149	rna-XM_019262547.2	gene-LOC104935257	LOC104935257	monocarboxylate transporter 4, transcript variant X4	1381	1402	160	-26.01	miRNA: 3' uccuacUUGGGCGACGUCUCCu 5' :**:**|:*::||||||||||| target: 5' gttgacAGATTGCTGCAGAGGa 3'	1372	1393	-38.2	0.000581	target: 5' GGGUUGACAGAUUGCUGCAGAGGAA 3' |:::*******::|||||||||||* miRNA: 3' CUUG-------GGCGACGUCUCCU- 5'	no
lcr-miR-N149	rna-XM_027285848.1	gene-LOC104918807	LOC104918807	cytohesin-3, transcript variant X2	762	783	171	-25.58	miRNA: 3' uccUACUUGGGCGACGUCUCCu 5' |**||||:|::*:||||||||* target: 5' aaaATGAGCTTTTTGCAGAGGc 3'	764	785	-29	0.008158	target: 5' AGCUUUUUGCAGAGGC 3' |:|::*:||||||||* miRNA: 3' UUGGGCGACGUCUCCU 5'	no
lcr-miR-N149	rna-XM_019265964.2	gene-LOC104939391	LOC104939391	thyroid hormone receptor-associated protein 3-like, transcript variant X1	278	299	167	-26.88	miRNA: 3' uccUACUUGGGCGACGUCUCCu 5' |**||||*||:|**|||||||| target: 5' aacATGATCCTGAAGCAGAGGa 3'	270	291	-31.6	0.004954	target: 5' GCAACAUGAUCCUGAAGCAGAGGAG 3' *****||||*||:|**||||||||* miRNA: 3' -----UACUUGGGCGACGUCUCCU- 5'	no
lcr-miR-N149	rna-XM_019265697.2	gene-LOC104936244	LOC104936244	type I phosphatidylinositol 4,5-bisphosphate 4-phosphatase-B	491	510	165	-29.47	miRNA: 3' ucCUACUUGGGCGACGUCUCCu 5' ||||||||:*||**|||||||| target: 5' agGATGAATACG--GCAGAGGa 3'	490	511	-33.2	0.004438	target: 5' GAAUACG--GCAGAGGAG 3' |||:*||**||||||||* miRNA: 3' CUUGGGCGACGUCUCCU- 5'	no
lcr-miR-N149	rna-XM_019266514.2	gene-LOC104926141	LOC104926141	serine/threonine-protein kinase LATS1, transcript variant X3	370	390	160	-24.28	miRNA: 3' uccuACUUGGGCGACGUCUCCu 5' *|**||||**|*|||||||||| target: 5' tgccTGAAAAC-CTGCAGAGGa 3'	359	380	-31.6	0.005449	target: 5' UGCGCUGCCUGAAAACCUGCAGAGGAA 3' ||****:||:|*****||||||||||* miRNA: 3' ACU---UGGGC-----GACGUCUCCU- 5'	no
lcr-miR-N149	rna-XM_019254089.2	gene-LOC109137019	LOC109137019	potassium channel subfamily K member 16-like	1315	1337	171	-29.11	miRNA: 3' ucCUACUUGGG-CGACGUCUCCu 5' **|*||*:|||*||||||||||* target: 5' ttGCTGTGCCCAGCTGCAGAGGt 3'	1317	1338	-33.1	0.002623	target: 5' UGCCCAGCUGCAGAGGU 3' *:|||*||||||||||* miRNA: 3' UUGGG-CGACGUCUCCU 5'	no
lcr-miR-N149	rna-XM_019270267.2	gene-LOC104918489	LOC104918489	zinc finger protein GLIS1, transcript variant X2	1687	1708	172	-27.49	miRNA: 3' uccuacUUGGGCGACGUCUCCu 5' ***:**|||||||*|||||||* target: 5' tttgcaAACCCGCAGCAGAGGc 3'	1683	1704	-31.9	0.00682	target: 5' GCAAACCCGCAGCAGAGGC 3' |**|||||||*|||||||* miRNA: 3' C--UUGGGCGACGUCUCCU 5'	no
lcr-miR-N149	rna-XM_019274652.2	gene-pbx3	pbx3	PBX homeobox 3, transcript variant X6	54	75	160	-24.58	miRNA: 3' ucCUACUUGGGCGACGUCUCCu 5' *||*|||*||**|*|||||||| target: 5' tgGCTGACCCAACAGCAGAGGa 3'	30	51	-30	0.000953	target: 5' UGGACUCUUUUAAAAACCUGGCUGACCCAACAGCAGAGGAU 3' ||:||:|*************|||*********||||||||* miRNA: 3' ACUUGGG-------------CGA---------CGUCUCCU- 5'	no
lcr-miR-N149	rna-XM_027291558.1	gene-LOC104937550	LOC104937550	xin actin-binding repeat-containing protein 2, transcript variant X1	12	31	160	-24.39	miRNA: 3' uccUACUUGGGCGACGUCUCCu 5' :**:||||**|*|||||||||* target: 5' gctGTGAA--CACTGCAGAGGc 3'	14	35	-28.2	0.001934	target: 5' AACA--CUGCAGAGGC 3' |||***|||||||||* miRNA: 3' UUGGGCGACGUCUCCU 5'	no
lcr-miR-N149	rna-XM_010732474.3	gene-golm1	golm1	golgi membrane protein 1, transcript variant X2	1197	1218	161	-28.62	miRNA: 3' uccuaCUUGGGCGACGUCUCCu 5' :|*:*|:::|:||*|||||||* target: 5' ggaggGGGTCTGCAGCAGAGGc 3'	1195	1216	-33.4	0.007375	target: 5' GGGUCUGCAGCAGAGGC 3' |:::|:||*|||||||* miRNA: 3' CUUGGGCGACGUCUCCU 5'	no
lcr-miR-N149	rna-XM_019276872.2	gene-LOC104938279	LOC104938279	scavenger receptor cysteine-rich type 1 protein M130, transcript variant X3	93	114	162	-23.63	miRNA: 3' uccuACUUGGGCGACGUCUCCu 5' ****||:|**|*|||||||||: target: 5' ctccTGGAGACACTGCAGAGGg 3'	97	118	-28.1	0.004585	target: 5' GACA--CUGCAGAGGGU 3' :||***|||||||||:* miRNA: 3' UUGGGCGACGUCUCCU- 5'	no
lcr-miR-N149	rna-XM_010745186.3	gene-LOC104930405	LOC104930405	protocadherin gamma-C5, transcript variant X13	840	861	165	-30.43	miRNA: 3' ucCUACUUGGGCGA-CGUCUCCu 5' **||*|:|||*|||*|||||||: target: 5' caGA-GGACCGGCTGGCAGAGGg 3'	843	864	-33.2	0.005265	target: 5' GACCGGCUGGCAGAGGGU 3' :|||*|||*|||||||:* miRNA: 3' UUGGGCGA-CGUCUCCU- 5'	no
lcr-miR-N149	rna-XM_027278300.1	gene-LOC104930405	LOC104930405	protocadherin gamma-C5, transcript variant X13	840	861	165	-30.43	miRNA: 3' ucCUACUUGGGCGA-CGUCUCCu 5' **||*|:|||*|||*|||||||: target: 5' caGA-GGACCGGCTGGCAGAGGg 3'	843	864	-33.2	0.005265	target: 5' GACCGGCUGGCAGAGGGU 3' :|||*|||*|||||||:* miRNA: 3' UUGGGCGA-CGUCUCCU- 5'	no
lcr-miR-N149	rna-XM_027285295.1	gene-LOC109136703	LOC109136703	neurabin-1, transcript variant X6	179	199	160	-26.37	miRNA: 3' uccuACUUGGGCGACGUCUCCu 5' ****||:|||:|**|||||||* target: 5' tcttTGGACCTG-AGCAGAGGt 3'	182	203	-29.8	0.007615	target: 5' GACCUGA-GCAGAGGU 3' :|||:|**|||||||* miRNA: 3' UUGGGCGACGUCUCCU 5'	no
lcr-miR-N149	rna-XM_027277445.1	gene-golm1	golm1	golgi membrane protein 1, transcript variant X2	1197	1218	161	-28.62	miRNA: 3' uccuaCUUGGGCGACGUCUCCu 5' :|*:*|:::|:||*|||||||* target: 5' ggaggGGGTCTGCAGCAGAGGc 3'	1195	1216	-33.4	0.007375	target: 5' GGGUCUGCAGCAGAGGC 3' |:::|:||*|||||||* miRNA: 3' CUUGGGCGACGUCUCCU 5'	no
lcr-miR-N149	rna-XM_010736150.3	gene-tfap2a	tfap2a	transcription factor AP-2 alpha, transcript variant X5	327	348	160	-26.01	miRNA: 3' ucCUACUUGGGCGACGUCUCCu 5' |*||**||***||||||||||| target: 5' aaGAGAAAAAAGCTGCAGAGGa 3'	330	351	-30.4	0.001848	target: 5' AAAAAAGCUGCAGAGGAA 3' ||****|||||||||||* miRNA: 3' UUGGG-CGACGUCUCCU- 5'	no
lcr-miR-N149	rna-XM_019257477.2	gene-LOC104937550	LOC104937550	xin actin-binding repeat-containing protein 2, transcript variant X1	12	31	160	-24.39	miRNA: 3' uccUACUUGGGCGACGUCUCCu 5' :**:||||**|*|||||||||* target: 5' gctGTGAA--CACTGCAGAGGc 3'	14	35	-28.2	0.001934	target: 5' AACA--CUGCAGAGGC 3' |||***|||||||||* miRNA: 3' UUGGGCGACGUCUCCU 5'	no
lcr-miR-N149	rna-XM_027290490.1	gene-slc39a3	slc39a3	solute carrier family 39 member 3, transcript variant X4	83	103	174	-31.81	miRNA: 3' ucCUACUUGGGCGACGUCUCCu 5' *|||*||||:|*|||||||||* target: 5' tgGACGAACTC-CTGCAGAGGt 3'	83	104	-34.7	2.5e-05	target: 5' AACUC-CUGCAGAGGU 3' |||:|*|||||||||* miRNA: 3' UUGGGCGACGUCUCCU 5'	no
lcr-miR-N149	rna-XM_019271833.2	gene-camsap1	camsap1	calmodulin regulated spectrin associated protein 1, transcript variant X1	106	129	163	-27.32	miRNA: 3' uccuacUUGGGCGA--CGUCUCCu 5' :**:**||||:|||**|||||||* target: 5' gctggaAACCTGCTCGGCAGAGGc 3'	102	123	-33.1	0.004386	target: 5' UGGAAACCUGCUCGGCAGAGGC 3' ||:**|||:|||**|||||||* miRNA: 3' ACU--UGGGCGA--CGUCUCCU 5'	no
lcr-miR-N149	rna-XM_019255600.2	gene-LOC104940462	LOC104940462	genetic suppressor element 1, transcript variant X1	640	661	160	-22.46	miRNA: 3' ucCUACUUGGGCGACGUCUCCu 5' **|:|*||**:*|||||||||| target: 5' ctGGTAAAGGTTCTGCAGAGGa 3'	620	641	-31.6	0.006639	target: 5' AAGUUGUUUGUGUGCUGGUAAAGGUUCUGCAGAGGAU 3' |************:|:*|:********|||||||||* miRNA: 3' U------------UGGGCG--------ACGUCUCCU- 5'	no
lcr-miR-N149	rna-XM_010748909.3	gene-hmgcs1	hmgcs1	3-hydroxy-3-methylglutaryl-CoA synthase 1	2207	2228	169	-31.62	miRNA: 3' uccuaCUUGGGCGACGUCUCCu 5' **|**|::||:|:||||||||* target: 5' ttgtaGGGCCTGTTGCAGAGGt 3'	2209	2230	-34.5	0.002771	target: 5' GGCCUGUUGCAGAGGU 3' ::||:|:||||||||* miRNA: 3' UUGGGCGACGUCUCCU 5'	no
lcr-miR-N149	rna-XM_027274627.1	gene-mta1	mta1	metastasis associated 1, transcript variant X5	642	663	166	-28.16	miRNA: 3' uccuacuuGGGCGACGUCUCCu 5' :****|**|:|||||||||||* target: 5' gctcagtcCTCGCTGCAGAGGc 3'	639	660	-32.2	0.004856	target: 5' CAGUCCUCGCUGCAGAGGC 3' **|**|:|||||||||||* miRNA: 3' --CUUGGGCGACGUCUCCU 5'	no
lcr-miR-N149	rna-XM_027278201.1	gene-LOC104930405	LOC104930405	protocadherin gamma-C5, transcript variant X13	840	861	165	-30.43	miRNA: 3' ucCUACUUGGGCGA-CGUCUCCu 5' **||*|:|||*|||*|||||||: target: 5' caGA-GGACCGGCTGGCAGAGGg 3'	843	864	-33.2	0.005265	target: 5' GACCGGCUGGCAGAGGGU 3' :|||*|||*|||||||:* miRNA: 3' UUGGGCGA-CGUCUCCU- 5'	no
lcr-miR-N149	rna-XM_019253036.2	gene-tfap2a	tfap2a	transcription factor AP-2 alpha, transcript variant X5	327	348	160	-26.01	miRNA: 3' ucCUACUUGGGCGACGUCUCCu 5' |*||**||***||||||||||| target: 5' aaGAGAAAAAAGCTGCAGAGGa 3'	330	351	-30.4	0.001848	target: 5' AAAAAAGCUGCAGAGGAA 3' ||****|||||||||||* miRNA: 3' UUGGG-CGACGUCUCCU- 5'	no
lcr-miR-N149	rna-XM_027273063.1	gene-plcz1	plcz1	phospholipase C zeta 1, transcript variant X1	164	188	161	-26.83	miRNA: 3' uccuACUUGG---GCGACGUCUCCu 5' *|**||*||:***|||||||||||| target: 5' tgccTGCACTGTGCGCTGCAGAGGa 3'	167	188	-31.4	0.001525	target: 5' CACUGUGCGCUGCAGAGGAA 3' *||:***||||||||||||* miRNA: 3' UUGG---GCGACGUCUCCU- 5'	no
lcr-miR-N149	rna-XM_019275504.2	gene-ctxn2	ctxn2	cortexin 2, transcript variant X1	1100	1122	162	-27.81	miRNA: 3' uccuacuUGGGC-GACGUCUCCu 5' *******|||:|*|||||||||| target: 5' tctcactACCTGCCTGCAGAGGa 3'	1089	1110	-34.4	0.001483	target: 5' AAACUCUCACUACCUGCCUGCAGAGGAA 3' *|*********|||:|*||||||||||* miRNA: 3' CU---------UGGGC-GACGUCUCCU- 5'	no
lcr-miR-N149	rna-XM_019265246.2	gene-ror1	ror1	receptor tyrosine kinase like orphan receptor 1, transcript variant X1	1156	1177	164	-27.07	miRNA: 3' uccuacUUGGGCGACGUCUCCu 5' ***|**|:|:*||||||||||| target: 5' ttcaaaAGCTGGCTGCAGAGGa 3'	1160	1181	-32.5	0.009465	target: 5' AGCUGGCUGCAGAGGAC 3' |:|:*|||||||||||* miRNA: 3' UUGGGCGACGUCUCCU- 5'	no
lcr-miR-N149	rna-XM_010730840.3	gene-pgrmc1	pgrmc1	progesterone receptor membrane component 1	1774	1795	167	-27.69	miRNA: 3' uccUACUUGGGCGACGUCUCCu 5' ***:||:**|:||||||||||* target: 5' tttGTGGTGCTGCTGCAGAGGc 3'	1775	1796	-35.4	0.001438	target: 5' GUGCUGCUGCAGAGGC 3' :**|:||||||||||* miRNA: 3' UUGGGCGACGUCUCCU 5'	no
lcr-miR-N149	rna-XM_027288406.1	gene-tpd52l2	tpd52l2	TPD52 like 2, transcript variant X1	2413	2434	168	-25.07	miRNA: 3' uccuacUUGGGCGACGUCUCCu 5' :*****|:||*||||||||||* target: 5' gctcacAGCCAGCTGCAGAGGc 3'	2401	2422	-33	0.006319	target: 5' AGCCCGCUCACAGCCAGCUGCAGAGGC 3' |:|||||***********||||||||* miRNA: 3' UUGGGCG-----------ACGUCUCCU 5'	no
lcr-miR-N149	rna-XM_027280754.1	gene-sptbn4	sptbn4	spectrin beta, non-erythrocytic 4, transcript variant X1	2016	2037	172	-26.83	miRNA: 3' ucCUACUUGGGCGACGUCUCCu 5' :*||*|*:|||*|||||||||* target: 5' gaGAAGCGCCCACTGCAGAGGc 3'	2005	2026	-34.2	0.006184	target: 5' UUUGAGAAGCGCCCACUGCAGAGGC 3' **|||*****:|||*|||||||||* miRNA: 3' --ACU-----UGGGCGACGUCUCCU 5'	no
lcr-miR-N149	rna-XM_027282463.1	gene-ybey	ybey	ybeY metalloendoribonuclease	831	854	163	-28.16	miRNA: 3' uccuaCUUGG-GCGA-CGUCUCCu 5' **|**|||||*||:|*|||||||* target: 5' tagtgGAACCGCGTTAGCAGAGGt 3'	824	845	-32.5	0.002571	target: 5' CUAGUGGAACCGCGUUAGCAGAGGU 3' ******|||||*||:|*|||||||* miRNA: 3' ------CUUGG-GCGA-CGUCUCCU 5'	no
lcr-miR-N149	rna-XM_027278230.1	gene-LOC104930405	LOC104930405	protocadherin gamma-C5, transcript variant X13	840	861	165	-30.43	miRNA: 3' ucCUACUUGGGCGA-CGUCUCCu 5' **||*|:|||*|||*|||||||: target: 5' caGA-GGACCGGCTGGCAGAGGg 3'	843	864	-33.2	0.005265	target: 5' GACCGGCUGGCAGAGGGU 3' :|||*|||*|||||||:* miRNA: 3' UUGGGCGA-CGUCUCCU- 5'	no
lcr-miR-N149	rna-XM_027274626.1	gene-mta1	mta1	metastasis associated 1, transcript variant X5	642	663	166	-28.16	miRNA: 3' uccuacuuGGGCGACGUCUCCu 5' :****|**|:|||||||||||* target: 5' gctcagtcCTCGCTGCAGAGGc 3'	639	660	-32.2	0.004856	target: 5' CAGUCCUCGCUGCAGAGGC 3' **|**|:|||||||||||* miRNA: 3' --CUUGGGCGACGUCUCCU 5'	no
lcr-miR-N149	rna-XM_027288403.1	gene-tpd52l2	tpd52l2	TPD52 like 2, transcript variant X1	2413	2434	168	-25.07	miRNA: 3' uccuacUUGGGCGACGUCUCCu 5' :*****|:||*||||||||||* target: 5' gctcacAGCCAGCTGCAGAGGc 3'	2401	2422	-33	0.006319	target: 5' AGCCCGCUCACAGCCAGCUGCAGAGGC 3' |:|||||***********||||||||* miRNA: 3' UUGGGCG-----------ACGUCUCCU 5'	no
lcr-miR-N149	rna-XM_019257478.2	gene-LOC104937550	LOC104937550	xin actin-binding repeat-containing protein 2, transcript variant X1	12	31	160	-24.39	miRNA: 3' uccUACUUGGGCGACGUCUCCu 5' :**:||||**|*|||||||||* target: 5' gctGTGAA--CACTGCAGAGGc 3'	14	35	-28.2	0.001934	target: 5' AACA--CUGCAGAGGC 3' |||***|||||||||* miRNA: 3' UUGGGCGACGUCUCCU 5'	no
lcr-miR-N149	rna-XM_010734805.3	gene-cyhr1	cyhr1	cysteine and histidine rich 1	2008	2030	163	-33.19	miRNA: 3' ucCUACUUGGG-CGACGUCUCCu 5' *||:|||||::*|**|||||||: target: 5' tgGGTGAACTTGGAGGCAGAGGg 3'	399	420	-33.6	0.004402	target: 5' AACUUGGAGGCAGAGGGG 3' |||::|***|||||||:* miRNA: 3' UUGGGCGA-CGUCUCCU- 5'	no
lcr-miR-N149	rna-XM_019268772.2	gene-gorab	gorab	golgin, RAB6 interacting	958	977	165	-29.63	miRNA: 3' ucCUACUUGGGCGACGUCUCCu 5' *||||||**:|*|||||||||* target: 5' tgGATGA--TCTCTGCAGAGGt 3'	958	979	-31.7	0.004597	target: 5' AGCAGACUGUACCUGACACGACUGUCGGGCUGCAGAGGGA 3' *******||*|||:**************||||||||||:* miRNA: 3' -------ACUUGGG--------------CGACGUCUCCU- 5'	no
lcr-miR-N149	rna-XM_010746013.3	gene-LOC104931087	LOC104931087	sclerostin domain-containing protein 1	2	22	164	-24.01	miRNA: 3' uccuACUUGGGCGACGUCUCCu 5' |***||||*:|*|||||||||: target: 5' acccTGAAATC-CTGCAGAGGg 3'	1	22	-27.6	0.003572	target: 5' AACCCUGAAAUCCUGCAGAGGGG 3' |||||*******|||||||||:* miRNA: 3' UUGGGC------GACGUCUCCU- 5'	no
lcr-miR-N149	rna-XM_010736093.3	gene-col11a1	col11a1	collagen type XI alpha 1 chain, transcript variant X2	250	271	170	-26.9	miRNA: 3' uccuACUUGGGCGACGUCUCCu 5' ****|||||*||:*|||||||| target: 5' cattTGAACGCGTGGCAGAGGa 3'	245	266	-35.9	0.000417	target: 5' AUUUGAACGCGUGGCAGAGGAG 3' ***|||||*||:*||||||||* miRNA: 3' ---ACUUGGGCGACGUCUCCU- 5'	no
lcr-miR-N149	rna-XM_019260872.2	gene-plcz1	plcz1	phospholipase C zeta 1, transcript variant X1	164	188	161	-26.83	miRNA: 3' uccuACUUGG---GCGACGUCUCCu 5' *|**||*||:***|||||||||||| target: 5' tgccTGCACTGTGCGCTGCAGAGGa 3'	167	188	-31.4	0.001525	target: 5' CACUGUGCGCUGCAGAGGAA 3' *||:***||||||||||||* miRNA: 3' UUGG---GCGACGUCUCCU- 5'	no
lcr-miR-N149	rna-XM_019263955.2	gene-LOC104925377	LOC104925377	transcription factor AP-4, transcript variant X2	209	230	161	-30.65	miRNA: 3' ucCUACUUGGGCG-ACGUCUCCu 5' ||||||*::|*||*||||||||| target: 5' agGATG-GTCAGCGTGCAGAGGa 3'	208	229	-33.7	0.002484	target: 5' GGUCA-GCGUGCAGAGGAG 3' |:*|**||*|||||||||* miRNA: 3' CUUGGGCG-ACGUCUCCU- 5'	no
lcr-miR-N149	rna-XM_027277281.1	gene-snx2	snx2	sorting nexin 2, transcript variant X2	2258	2279	162	-29.55	miRNA: 3' uccuacuuGGGCGACGUCUCCu 5' :*|**|**::|||||||||||| target: 5' gagcagttTTCGCTGCAGAGGa 3'	2255	2276	-33.6	0.004786	target: 5' AGCAGUUUUCGCUGCAGAGGAA 3' |:|*****:||||||||||||* miRNA: 3' UUG-----GGCGACGUCUCCU- 5'	no
lcr-miR-N149	rna-XM_010757073.3	gene-LOC104940462	LOC104940462	genetic suppressor element 1, transcript variant X1	640	661	160	-22.46	miRNA: 3' ucCUACUUGGGCGACGUCUCCu 5' **|:|*||**:*|||||||||| target: 5' ctGGTAAAGGTTCTGCAGAGGa 3'	620	641	-31.6	0.006639	target: 5' AAGUUGUUUGUGUGCUGGUAAAGGUUCUGCAGAGGAU 3' |************:|:*|:********|||||||||* miRNA: 3' U------------UGGGCG--------ACGUCUCCU- 5'	no
lcr-miR-N149	rna-XM_027281527.1	gene-ctxn2	ctxn2	cortexin 2, transcript variant X1	1100	1122	162	-27.81	miRNA: 3' uccuacuUGGGC-GACGUCUCCu 5' *******|||:|*|||||||||| target: 5' tctcactACCTGCCTGCAGAGGa 3'	1089	1110	-34.4	0.001483	target: 5' AAACUCUCACUACCUGCCUGCAGAGGAA 3' *|*********|||:|*||||||||||* miRNA: 3' CU---------UGGGC-GACGUCUCCU- 5'	no
lcr-miR-N149	rna-XM_027272193.1	gene-LOC113744060	LOC113744060	glucagon family neuropeptides-like, transcript variant X2	2218	2240	170	-30.09	miRNA: 3' uccUACUUGGGCG-ACGUCUCCu 5' *|*:|||:|*|||*||||||||* target: 5' tgtGTGAGCGCGCATGCAGAGGt 3'	2218	2239	-33	0.006008	target: 5' AGCGCGCAUGCAGAGGU 3' |:|*|||*||||||||* miRNA: 3' UUGGGCG-ACGUCUCCU 5'	no
lcr-miR-N149	rna-XM_010751625.3	gene-slc39a3	slc39a3	solute carrier family 39 member 3, transcript variant X4	83	103	174	-31.81	miRNA: 3' ucCUACUUGGGCGACGUCUCCu 5' *|||*||||:|*|||||||||* target: 5' tgGACGAACTC-CTGCAGAGGt 3'	83	104	-34.7	2.5e-05	target: 5' AACUC-CUGCAGAGGU 3' |||:|*|||||||||* miRNA: 3' UUGGGCGACGUCUCCU 5'	no
lcr-miR-N149	rna-XM_019265962.2	gene-LOC104939391	LOC104939391	thyroid hormone receptor-associated protein 3-like, transcript variant X1	278	299	167	-26.88	miRNA: 3' uccUACUUGGGCGACGUCUCCu 5' |**||||*||:|**|||||||| target: 5' aacATGATCCTGAAGCAGAGGa 3'	270	291	-31.6	0.004954	target: 5' GCAACAUGAUCCUGAAGCAGAGGAG 3' *****||||*||:|**||||||||* miRNA: 3' -----UACUUGGGCGACGUCUCCU- 5'	no
lcr-miR-N149	rna-XM_027289385.1	gene-mta3	mta3	metastasis associated 1 family member 3, transcript variant X2	1105	1126	167	-29.44	miRNA: 3' uccUACUUGGGCGACGUCUCCu 5' ***||***||:||||||||||: target: 5' tctATCTCCCTGCTGCAGAGGg 3'	1111	1132	-32.8	0.002677	target: 5' -CCCUGCUGCAGAGGGU 3' **||:||||||||||:* miRNA: 3' UUGGGCGACGUCUCCU- 5'	no
lcr-miR-N149	rna-XM_010734059.3	gene-hspa9	hspa9	heat shock protein family A (Hsp70) member 9	1052	1073	164	-32.79	miRNA: 3' ucCUACUUGGGCGACGUCUCCu 5' :*|:||::||*|**|||||||: target: 5' gaGGTGGGCCGGAGGCAGAGGg 3'	1049	1070	-32.7	0.002248	target: 5' UGGGCCGGAGGCAGAGGGC 3' ||::||*|**|||||||:* miRNA: 3' ACUUGGGCGACGUCUCCU- 5'	no
lcr-miR-N149	rna-XM_027277278.1	gene-snx2	snx2	sorting nexin 2, transcript variant X2	2258	2279	162	-29.55	miRNA: 3' uccuacuuGGGCGACGUCUCCu 5' :*|**|**::|||||||||||| target: 5' gagcagttTTCGCTGCAGAGGa 3'	2255	2276	-33.6	0.004786	target: 5' AGCAGUUUUCGCUGCAGAGGAA 3' |:|*****:||||||||||||* miRNA: 3' UUG-----GGCGACGUCUCCU- 5'	no
lcr-miR-N149	rna-XM_027278255.1	gene-LOC104930405	LOC104930405	protocadherin gamma-C5, transcript variant X13	840	861	165	-30.43	miRNA: 3' ucCUACUUGGGCGA-CGUCUCCu 5' **||*|:|||*|||*|||||||: target: 5' caGA-GGACCGGCTGGCAGAGGg 3'	843	864	-33.2	0.005265	target: 5' GACCGGCUGGCAGAGGGU 3' :|||*|||*|||||||:* miRNA: 3' UUGGGCGA-CGUCUCCU- 5'	no
lcr-miR-N149	rna-XM_019259924.2	gene-golm1	golm1	golgi membrane protein 1, transcript variant X2	1197	1218	161	-28.62	miRNA: 3' uccuaCUUGGGCGACGUCUCCu 5' :|*:*|:::|:||*|||||||* target: 5' ggaggGGGTCTGCAGCAGAGGc 3'	1195	1216	-33.4	0.007375	target: 5' GGGUCUGCAGCAGAGGC 3' |:::|:||*|||||||* miRNA: 3' CUUGGGCGACGUCUCCU 5'	no
lcr-miR-N149	rna-XM_019263902.2	gene-LOC104930405	LOC104930405	protocadherin gamma-C5, transcript variant X13	840	861	165	-30.43	miRNA: 3' ucCUACUUGGGCGA-CGUCUCCu 5' **||*|:|||*|||*|||||||: target: 5' caGA-GGACCGGCTGGCAGAGGg 3'	843	864	-33.2	0.005265	target: 5' GACCGGCUGGCAGAGGGU 3' :|||*|||*|||||||:* miRNA: 3' UUGGGCGA-CGUCUCCU- 5'	no
lcr-miR-N149	rna-XM_010738984.3	gene-LOC104925377	LOC104925377	transcription factor AP-4, transcript variant X2	209	230	161	-30.65	miRNA: 3' ucCUACUUGGGCG-ACGUCUCCu 5' ||||||*::|*||*||||||||| target: 5' agGATG-GTCAGCGTGCAGAGGa 3'	208	229	-33.7	0.002484	target: 5' GGUCA-GCGUGCAGAGGAG 3' |:*|**||*|||||||||* miRNA: 3' CUUGGGCG-ACGUCUCCU- 5'	no
lcr-miR-N149	rna-XM_010736089.3	gene-col11a1	col11a1	collagen type XI alpha 1 chain, transcript variant X2	250	271	170	-26.9	miRNA: 3' uccuACUUGGGCGACGUCUCCu 5' ****|||||*||:*|||||||| target: 5' cattTGAACGCGTGGCAGAGGa 3'	245	266	-35.9	0.000417	target: 5' AUUUGAACGCGUGGCAGAGGAG 3' ***|||||*||:*||||||||* miRNA: 3' ---ACUUGGGCGACGUCUCCU- 5'	no
lcr-miR-N149	rna-XM_010736892.3	gene-LOC104923568	LOC104923568	F-box only protein 11, transcript variant X4	173	195	163	-29.81	miRNA: 3' ucCUAC-UUGGGCGACGUCUCCu 5' :*|:||*||***||||||||||| target: 5' gaGGTGAAAGAGGCTGCAGAGGa 3'	173	194	-33.7	0.001909	target: 5' GAAAGAGGCUGCAGAGGAA 3' |||****|||||||||||* miRNA: 3' CUUGGG-CGACGUCUCCU- 5'	no
lcr-miR-N149	rna-XM_010730507.3	gene-LOC104918680	LOC104918680	dedicator of cytokinesis protein 7, transcript variant X2	777	797	165	-26.65	miRNA: 3' uccUACUUGGGCGACGUCUCCu 5' :**|||:|*::|:||||||||: target: 5' gaaATGGA-TTGTTGCAGAGGg 3'	774	795	-32.6	0.002622	target: 5' AUGGA-UUGUUGCAGAGGGA 3' *||:|*::|:||||||||:* miRNA: 3' -ACUUGGGCGACGUCUCCU- 5'	no
lcr-miR-N209	rna-XM_027274134.1	gene-cnksr2	cnksr2	connector enhancer of kinase suppressor of Ras 2, transcript variant X3	397	418	164	-20.62	miRNA: 3' agGACUUAAUGUUUCUCUAGAu 5' ||||||**|:*|*||||||||* target: 5' tcCTGACGTGGACAGAGATCTc 3'	396	417	-27.3	0.008876	target: 5' ACGUGGACAGAGAUCUC 3' |**|:*|*||||||||* miRNA: 3' UUAAUGUUUCUCUAGAU 5'	no
lcr-miR-N209	rna-XM_010743573.3	gene-LOC104929125	LOC104929125	synaptotagmin-2-like, transcript variant X1	30	51	160	-28.38	miRNA: 3' agGACUUAAUGUUUCUCUAGAu 5' |||||:|*|::|:||:|||||: target: 5' tcCTGGACTGTAGAGGGATCTg 3'	29	50	-28.9	0.005469	target: 5' GACUGUAGAGGGAUCUGC 3' :|*|::|:||:|||||:* miRNA: 3' UUAAUGUUUCUCUAGAU- 5'	no
lcr-miR-N209	rna-XM_027274133.1	gene-cnksr2	cnksr2	connector enhancer of kinase suppressor of Ras 2, transcript variant X3	397	418	164	-20.62	miRNA: 3' agGACUUAAUGUUUCUCUAGAu 5' ||||||**|:*|*||||||||* target: 5' tcCTGACGTGGACAGAGATCTc 3'	396	417	-27.3	0.008876	target: 5' ACGUGGACAGAGAUCUC 3' |**|:*|*||||||||* miRNA: 3' UUAAUGUUUCUCUAGAU 5'	no
lcr-miR-N209	rna-XM_010743572.3	gene-LOC104929125	LOC104929125	synaptotagmin-2-like, transcript variant X1	30	51	160	-28.38	miRNA: 3' agGACUUAAUGUUUCUCUAGAu 5' |||||:|*|::|:||:|||||: target: 5' tcCTGGACTGTAGAGGGATCTg 3'	29	50	-28.9	0.005469	target: 5' GACUGUAGAGGGAUCUGC 3' :|*|::|:||:|||||:* miRNA: 3' UUAAUGUUUCUCUAGAU- 5'	no
lcr-miR-N209	rna-XM_027273193.1	gene-LOC104929125	LOC104929125	synaptotagmin-2-like, transcript variant X1	30	51	160	-28.38	miRNA: 3' agGACUUAAUGUUUCUCUAGAu 5' |||||:|*|::|:||:|||||: target: 5' tcCTGGACTGTAGAGGGATCTg 3'	29	50	-28.9	0.005469	target: 5' GACUGUAGAGGGAUCUGC 3' :|*|::|:||:|||||:* miRNA: 3' UUAAUGUUUCUCUAGAU- 5'	no
lcr-miR-N209	rna-XM_027288343.1	gene-slc25a33	slc25a33	solute carrier family 25 member 33	517	538	176	-29.11	miRNA: 3' agGACUUAAUGUUUCUCUAGAu 5' *::|||||||||:||||||:|| target: 5' gtTTGAATTACAGAGAGATTTa 3'	517	538	-30.9	0.007734	target: 5' AUUACAGAGAGAUUUAU 3' ||||||:||||||:||* miRNA: 3' UAAUGUUUCUCUAGAU- 5'	no
lcr-miR-N215	rna-XM_027282856.1	gene-LOC104936699	LOC104936699	TBC1 domain family member 12	508	527	168	-30.88	miRNA: 3' ccaCUACAAGCAGUCGCUAGCc 5' ***|:||||||**||||||||| target: 5' aacGGTGTTCG--AGCGATCGg 3'	510	531	-32.9	0.005056	target: 5' GUUCG--AGCGAUCGGG 3' |||||**|||||||||* miRNA: 3' CAAGCAGUCGCUAGCC- 5'	no
lcr-miR-N215	rna-XM_010737201.3	gene-LOC104923983	LOC104923983	zeta-sarcoglycan	3	24	161	-32.86	miRNA: 3' ccacuacaaGCAGUCGCUAGCc 5' *|*||****:|||||||||||| target: 5' tgggagcagTGTCAGCGATCGg 3'	3	24	-32.6	0.001432	target: 5' GCAGUGUCAGCGAUCGGG 3' ****:||||||||||||* miRNA: 3' ACAAGCAGUCGCUAGCC- 5'	no
lcr-miR-N215	rna-XM_010739690.3	gene-dhx34	dhx34	DExH-box helicase 34	985	1006	172	-36.83	miRNA: 3' ccACUACAAGCAGUCGCUAGCc 5' |||*:||||||||||||:|||* target: 5' ggTCGTGTTCGTCAGCGGTCGc 3'	984	1005	-31.1	0.006424	target: 5' UGUUCGUCA-CGGUCGC 3' |||||||||*||:|||* miRNA: 3' ACAAGCAGUCGCUAGCC 5'	no
lcr-miR-N215	rna-XM_019274565.2	gene-pola1	pola1	DNA polymerase alpha 1, catalytic subunit	456	476	161	-28.56	miRNA: 3' ccaCUACAAGCAGUCGCUAGCc 5' ***||||**:|*|||||||||| target: 5' ctgGATGCCTG-CAGCGATCGg 3'	458	479	-29.1	0.009469	target: 5' GCCUG-CAGCGAUCGGA 3' |**:|*||||||||||* miRNA: 3' CAAGCAGUCGCUAGCC- 5'	no
lcr-miR-N216	rna-XM_010739690.3	gene-dhx34	dhx34	DExH-box helicase 34	985	1006	172	-36.83	miRNA: 3' ccACUACAAGCAGUCGCUAGCc 5' |||*:||||||||||||:|||* target: 5' ggTCGTGTTCGTCAGCGGTCGc 3'	984	1005	-31.1	0.006424	target: 5' UGUUCGUCA-CGGUCGC 3' |||||||||*||:|||* miRNA: 3' ACAAGCAGUCGCUAGCC 5'	no
lcr-miR-N216	rna-XM_027282856.1	gene-LOC104936699	LOC104936699	TBC1 domain family member 12	508	527	168	-30.88	miRNA: 3' ccaCUACAAGCAGUCGCUAGCc 5' ***|:||||||**||||||||| target: 5' aacGGTGTTCG--AGCGATCGg 3'	510	531	-32.9	0.005056	target: 5' GUUCG--AGCGAUCGGG 3' |||||**|||||||||* miRNA: 3' CAAGCAGUCGCUAGCC- 5'	no
lcr-miR-N216	rna-XM_010737201.3	gene-LOC104923983	LOC104923983	zeta-sarcoglycan	3	24	161	-32.86	miRNA: 3' ccacuacaaGCAGUCGCUAGCc 5' *|*||****:|||||||||||| target: 5' tgggagcagTGTCAGCGATCGg 3'	3	24	-32.6	0.001432	target: 5' GCAGUGUCAGCGAUCGGG 3' ****:||||||||||||* miRNA: 3' ACAAGCAGUCGCUAGCC- 5'	no
lcr-miR-N216	rna-XM_019274565.2	gene-pola1	pola1	DNA polymerase alpha 1, catalytic subunit	456	476	161	-28.56	miRNA: 3' ccaCUACAAGCAGUCGCUAGCc 5' ***||||**:|*|||||||||| target: 5' ctgGATGCCTG-CAGCGATCGg 3'	458	479	-29.1	0.009469	target: 5' GCCUG-CAGCGAUCGGA 3' |**:|*||||||||||* miRNA: 3' CAAGCAGUCGCUAGCC- 5'	no
lcr-miR-N221	rna-XM_010749433.3	gene-LOC104933891	LOC104933891	suppressor of cytokine signaling 3, transcript variant X1	413	438	164	-26.57	miRNA: 3' acuUGUAAGUUGCG--ACAGCCACUc 5' ***:|:*||||:||***||||||||* target: 5' gacGCGATCAATGCGACGTCGGTGAt 3'	411	434	-31.8	0.002832	target: 5' CGAUCAAUGCGACGUCGGUGAU 3' |:*||||:||***||||||||* miRNA: 3' GUAAGUUGCGA--CAGCCACUC 5'	no
lcr-miR-N221	rna-XM_027282424.1	gene-LOC113746497	LOC113746497	butyrophilin subfamily 2 member A2-like, transcript variant X2	551	574	161	-25.53	miRNA: 3' acuUGUAAGUUGCGACAGCCACUc 5' ***|||**|**:*||||||||||| target: 5' cccACAGACTTTACTGTCGGTGAg 3'	543	566	-31.8	0.005269	target: 5' UGCCCACAGACUUUACUGUCGGUGAGU 3' |*|*****:||****|||||||||||* miRNA: 3' AAG-----UUGC---GACAGCCACUC- 5'	no
lcr-miR-N221	rna-XM_019277582.2	gene-unc80	unc80	unc-80 homolog, NALCN channel complex subunit, transcript variant X13	403	427	171	-32.58	miRNA: 3' acuuGUAAG-UUGCGACAGCCACUc 5' **:*|||||*:|||||||:|||||* target: 5' gagcCATTCTGACGCTGTTGGTGAc 3'	402	425	-36.7	0.000718	target: 5' AUUCUGACGCUGUUGGUGAC 3' ||||*:|||||||:|||||* miRNA: 3' UAAG-UUGCGACAGCCACUC 5'	no
lcr-miR-N221	rna-XM_019277576.2	gene-unc80	unc80	unc-80 homolog, NALCN channel complex subunit, transcript variant X13	403	427	171	-32.58	miRNA: 3' acuuGUAAG-UUGCGACAGCCACUc 5' **:*|||||*:|||||||:|||||* target: 5' gagcCATTCTGACGCTGTTGGTGAc 3'	402	425	-36.7	0.000718	target: 5' AUUCUGACGCUGUUGGUGAC 3' ||||*:|||||||:|||||* miRNA: 3' UAAG-UUGCGACAGCCACUC 5'	no
lcr-miR-N221	rna-XM_027289488.1	gene-LOC104933891	LOC104933891	suppressor of cytokine signaling 3, transcript variant X1	413	438	164	-26.57	miRNA: 3' acuUGUAAGUUGCG--ACAGCCACUc 5' ***:|:*||||:||***||||||||* target: 5' gacGCGATCAATGCGACGTCGGTGAt 3'	411	434	-31.8	0.002832	target: 5' CGAUCAAUGCGACGUCGGUGAU 3' |:*||||:||***||||||||* miRNA: 3' GUAAGUUGCGA--CAGCCACUC 5'	no
lcr-miR-N221	rna-XM_019260191.2	gene-kidins220	kidins220	kinase D interacting substrate 220, transcript variant X3	39	62	169	-24.37	miRNA: 3' acuuguaAGUUGCGACAGCCACUc 5' ***::**|::|:|:|||||||||* target: 5' gttgttcTTGATGTTGTCGGTGAc 3'	41	64	-29.7	0.004371	target: 5' UUCUUGAUGUUGUCGGUGAC 3' |||**:|:|:|||||||||* miRNA: 3' AAG--UUGCGACAGCCACUC 5'	no
lcr-miR-N221	rna-XM_019277587.2	gene-unc80	unc80	unc-80 homolog, NALCN channel complex subunit, transcript variant X13	403	427	171	-32.58	miRNA: 3' acuuGUAAG-UUGCGACAGCCACUc 5' **:*|||||*:|||||||:|||||* target: 5' gagcCATTCTGACGCTGTTGGTGAc 3'	402	425	-36.7	0.000718	target: 5' AUUCUGACGCUGUUGGUGAC 3' ||||*:|||||||:|||||* miRNA: 3' UAAG-UUGCGACAGCCACUC 5'	no
lcr-miR-N221	rna-XM_019277590.2	gene-unc80	unc80	unc-80 homolog, NALCN channel complex subunit, transcript variant X13	403	427	171	-32.58	miRNA: 3' acuuGUAAG-UUGCGACAGCCACUc 5' **:*|||||*:|||||||:|||||* target: 5' gagcCATTCTGACGCTGTTGGTGAc 3'	402	425	-36.7	0.000718	target: 5' AUUCUGACGCUGUUGGUGAC 3' ||||*:|||||||:|||||* miRNA: 3' UAAG-UUGCGACAGCCACUC 5'	no
lcr-miR-N221	rna-XM_010738076.3	gene-LOC104924661	LOC104924661	putative testis-specific Y-encoded-like protein 3, transcript variant X3	334	359	168	-28.75	miRNA: 3' acUUGUAAGU-UGCG-ACAGCCACUc 5' **|:|*|*:|*||||*|||||||||| target: 5' acAGCCTCTACACGCATGTCGGTGAg 3'	322	345	-33.5	0.002317	target: 5' CGCACAACAGCCUCUACACGCAUGUCGGUGAGA 3' **||*************||||*||||||||||* miRNA: 3' AAGU-------------UGCG-ACAGCCACUC- 5'	no
lcr-miR-N221	rna-XM_010738691.3	gene-LOC104925139	LOC104925139	parapinopsin	45	68	177	-24.59	miRNA: 3' acuUGUAAGUUGCGACAGCCACUc 5' ***||*|*|||||:*||||||||* target: 5' gtcACCTGCAACGTCGTCGGTGAa 3'	39	62	-29.6	4.5e-05	target: 5' GUCACCUGCAACGUCGUCGGUGAA 3' **||****|||||:*||||||||* miRNA: 3' --GUAA--GUUGCGACAGCCACUC 5'	no
lcr-miR-N221	rna-XM_027282422.1	gene-LOC113746497	LOC113746497	butyrophilin subfamily 2 member A2-like, transcript variant X2	551	574	161	-25.53	miRNA: 3' acuUGUAAGUUGCGACAGCCACUc 5' ***|||**|**:*||||||||||| target: 5' cccACAGACTTTACTGTCGGTGAg 3'	543	566	-31.8	0.005247	target: 5' UGCCCACAGACUUUACUGUCGGUGAGU 3' |*|*****:||****|||||||||||* miRNA: 3' AAG-----UUGC---GACAGCCACUC- 5'	no
lcr-miR-N221	rna-XM_019277593.2	gene-unc80	unc80	unc-80 homolog, NALCN channel complex subunit, transcript variant X13	403	427	171	-32.58	miRNA: 3' acuuGUAAG-UUGCGACAGCCACUc 5' **:*|||||*:|||||||:|||||* target: 5' gagcCATTCTGACGCTGTTGGTGAc 3'	402	425	-36.7	0.000718	target: 5' AUUCUGACGCUGUUGGUGAC 3' ||||*:|||||||:|||||* miRNA: 3' UAAG-UUGCGACAGCCACUC 5'	no
lcr-miR-N221	rna-XM_027279500.1	gene-gnl3	gnl3	G protein nucleolar 3	334	357	170	-28.93	miRNA: 3' acuuguAAGUUGCGACAGCCACUc 5' ****:*||*:|:|:|||||||||| target: 5' cttctcTTGGATGTTGTCGGTGAg 3'	339	362	-31	0.001263	target: 5' UUGGAUGUUGUCGGUGAGU 3' ||*:|:|:||||||||||* miRNA: 3' AAGUUGCGACAGCCACUC- 5'	no
lcr-miR-N221	rna-XM_019277580.2	gene-unc80	unc80	unc-80 homolog, NALCN channel complex subunit, transcript variant X13	403	427	171	-32.58	miRNA: 3' acuuGUAAG-UUGCGACAGCCACUc 5' **:*|||||*:|||||||:|||||* target: 5' gagcCATTCTGACGCTGTTGGTGAc 3'	402	425	-36.7	0.000718	target: 5' AUUCUGACGCUGUUGGUGAC 3' ||||*:|||||||:|||||* miRNA: 3' UAAG-UUGCGACAGCCACUC 5'	no
lcr-miR-N221	rna-XM_019259788.2	gene-LOC104936242	LOC104936242	transcription factor E2F3, transcript variant X2	564	588	179	-27.36	miRNA: 3' acuuGUAAGUUG-CGACAGCCACUc 5' ****:||||*||*|||||||||||* target: 5' atctTATTCCACGGCTGTCGGTGAt 3'	562	585	-32.5	0.003485	target: 5' UAUUCCACGGCUGUCGGUGAU 3' :||||*||*|||||||||||* miRNA: 3' GUAAGUUG-CGACAGCCACUC 5'	no
lcr-miR-N221	rna-XM_019258993.2	gene-ccdc18	ccdc18	coiled-coil domain containing 18, transcript variant X1	425	449	161	-28.28	miRNA: 3' acUUGUAA-GUUGCGACAGCCACUc 5' ||:|::||*|*|:|||||:|||||* target: 5' tgGATGTTCCCATGCTGTTGGTGAc 3'	424	447	-33.8	0.0011	target: 5' GUUCCCAUGCUGUUGGUGAC 3' :|||**|:|||||:|||||* miRNA: 3' UAAGU-UGCGACAGCCACUC 5'	no
lcr-miR-N221	rna-XM_019277592.2	gene-unc80	unc80	unc-80 homolog, NALCN channel complex subunit, transcript variant X13	403	427	171	-32.58	miRNA: 3' acuuGUAAG-UUGCGACAGCCACUc 5' **:*|||||*:|||||||:|||||* target: 5' gagcCATTCTGACGCTGTTGGTGAc 3'	402	425	-36.7	0.000718	target: 5' AUUCUGACGCUGUUGGUGAC 3' ||||*:|||||||:|||||* miRNA: 3' UAAG-UUGCGACAGCCACUC 5'	no
lcr-miR-N221	rna-XM_019259787.2	gene-LOC104936242	LOC104936242	transcription factor E2F3, transcript variant X2	564	588	179	-27.36	miRNA: 3' acuuGUAAGUUG-CGACAGCCACUc 5' ****:||||*||*|||||||||||* target: 5' atctTATTCCACGGCTGTCGGTGAt 3'	562	585	-32.5	0.003485	target: 5' UAUUCCACGGCUGUCGGUGAU 3' :||||*||*|||||||||||* miRNA: 3' GUAAGUUG-CGACAGCCACUC 5'	no
lcr-miR-N221	rna-XM_019277585.2	gene-unc80	unc80	unc-80 homolog, NALCN channel complex subunit, transcript variant X13	403	427	171	-32.58	miRNA: 3' acuuGUAAG-UUGCGACAGCCACUc 5' **:*|||||*:|||||||:|||||* target: 5' gagcCATTCTGACGCTGTTGGTGAc 3'	402	425	-36.7	0.000718	target: 5' AUUCUGACGCUGUUGGUGAC 3' ||||*:|||||||:|||||* miRNA: 3' UAAG-UUGCGACAGCCACUC 5'	no
lcr-miR-N221	rna-XM_019260189.2	gene-kidins220	kidins220	kinase D interacting substrate 220, transcript variant X3	39	62	169	-24.37	miRNA: 3' acuuguaAGUUGCGACAGCCACUc 5' ***::**|::|:|:|||||||||* target: 5' gttgttcTTGATGTTGTCGGTGAc 3'	41	64	-29.7	0.004371	target: 5' UUCUUGAUGUUGUCGGUGAC 3' |||**:|:|:|||||||||* miRNA: 3' AAG--UUGCGACAGCCACUC 5'	no
lcr-miR-N221	rna-XM_019277578.2	gene-unc80	unc80	unc-80 homolog, NALCN channel complex subunit, transcript variant X13	403	427	171	-32.58	miRNA: 3' acuuGUAAG-UUGCGACAGCCACUc 5' **:*|||||*:|||||||:|||||* target: 5' gagcCATTCTGACGCTGTTGGTGAc 3'	402	425	-36.7	0.000718	target: 5' AUUCUGACGCUGUUGGUGAC 3' ||||*:|||||||:|||||* miRNA: 3' UAAG-UUGCGACAGCCACUC 5'	no
lcr-miR-N221	rna-XM_010741060.3	gene-hes4	hes4	hes family bHLH transcription factor 4, transcript variant X1	229	250	167	-25.09	miRNA: 3' acUUGUAAGUUGCGACAGCCACUc 5' **||||||:::*|**||||||||| target: 5' ccAACATTTGGAG--GTCGGTGAg 3'	230	253	-28.2	0.005621	target: 5' UUUGGAG--GUCGGUGAGA 3' ||:::*|**|||||||||* miRNA: 3' AAGUUGCGACAGCCACUC- 5'	no
lcr-miR-N221	rna-XM_010743976.3	gene-LOC104929452	LOC104929452	replication protein A 70 kDa DNA-binding subunit	253	278	169	-23.81	miRNA: 3' acuuguAAGUU--GCGACAGCCACUc 5' |**:**|||||**|*||||||||||* target: 5' tttggtTTCAAATCTCTGTCGGTGAt 3'	254	277	-27.5	0.008646	target: 5' -UUCAAAUCUCUGUCGGUGAU 3' *|||||****||||||||||* miRNA: 3' UAAGUUGC--GACAGCCACUC 5'	no
lcr-miR-N221	rna-XM_019277586.2	gene-unc80	unc80	unc-80 homolog, NALCN channel complex subunit, transcript variant X13	403	427	171	-32.58	miRNA: 3' acuuGUAAG-UUGCGACAGCCACUc 5' **:*|||||*:|||||||:|||||* target: 5' gagcCATTCTGACGCTGTTGGTGAc 3'	402	425	-36.7	0.000718	target: 5' AUUCUGACGCUGUUGGUGAC 3' ||||*:|||||||:|||||* miRNA: 3' UAAG-UUGCGACAGCCACUC 5'	no
lcr-miR-N221	rna-XM_019277591.2	gene-unc80	unc80	unc-80 homolog, NALCN channel complex subunit, transcript variant X13	403	427	171	-32.58	miRNA: 3' acuuGUAAG-UUGCGACAGCCACUc 5' **:*|||||*:|||||||:|||||* target: 5' gagcCATTCTGACGCTGTTGGTGAc 3'	402	425	-36.7	0.000718	target: 5' AUUCUGACGCUGUUGGUGAC 3' ||||*:|||||||:|||||* miRNA: 3' UAAG-UUGCGACAGCCACUC 5'	no
lcr-miR-N221	rna-XM_010739283.3	gene-LOC104925620	LOC104925620	WD repeat-containing protein 26	1022	1046	172	-35.14	miRNA: 3' acuuguaAGU-UGCGACAGCCACUc 5' *|::*:*|||*|||:|||||||||| target: 5' ggggggaTCAGACGTTGTCGGTGAg 3'	1022	1045	-34.7	0.002914	target: 5' UCAGACGUUGUCGGUGAGG 3' |**:|||:||||||||||* miRNA: 3' AAGUUGCGACAGCCACUC- 5'	no
lcr-miR-N221	rna-XM_019277583.2	gene-unc80	unc80	unc-80 homolog, NALCN channel complex subunit, transcript variant X13	403	427	171	-32.58	miRNA: 3' acuuGUAAG-UUGCGACAGCCACUc 5' **:*|||||*:|||||||:|||||* target: 5' gagcCATTCTGACGCTGTTGGTGAc 3'	402	425	-36.7	0.000718	target: 5' AUUCUGACGCUGUUGGUGAC 3' ||||*:|||||||:|||||* miRNA: 3' UAAG-UUGCGACAGCCACUC 5'	no
lcr-miR-N221	rna-XM_019260187.2	gene-kidins220	kidins220	kinase D interacting substrate 220, transcript variant X3	39	62	169	-24.37	miRNA: 3' acuuguaAGUUGCGACAGCCACUc 5' ***::**|::|:|:|||||||||* target: 5' gttgttcTTGATGTTGTCGGTGAc 3'	41	64	-29.7	0.004371	target: 5' UUCUUGAUGUUGUCGGUGAC 3' |||**:|:|:|||||||||* miRNA: 3' AAG--UUGCGACAGCCACUC 5'	no
lcr-miR-N221	rna-XM_027291372.1	gene-unc80	unc80	unc-80 homolog, NALCN channel complex subunit, transcript variant X13	403	427	171	-32.58	miRNA: 3' acuuGUAAG-UUGCGACAGCCACUc 5' **:*|||||*:|||||||:|||||* target: 5' gagcCATTCTGACGCTGTTGGTGAc 3'	402	425	-36.7	0.000718	target: 5' AUUCUGACGCUGUUGGUGAC 3' ||||*:|||||||:|||||* miRNA: 3' UAAG-UUGCGACAGCCACUC 5'	no
lcr-miR-N221	rna-XM_010738077.3	gene-LOC104924661	LOC104924661	putative testis-specific Y-encoded-like protein 3, transcript variant X3	334	359	168	-28.75	miRNA: 3' acUUGUAAGU-UGCG-ACAGCCACUc 5' **|:|*|*:|*||||*|||||||||| target: 5' acAGCCTCTACACGCATGTCGGTGAg 3'	322	345	-33.5	0.002317	target: 5' CGCACAACAGCCUCUACACGCAUGUCGGUGAGA 3' **||*************||||*||||||||||* miRNA: 3' AAGU-------------UGCG-ACAGCCACUC- 5'	no
lcr-miR-N221	rna-XM_019260190.2	gene-kidins220	kidins220	kinase D interacting substrate 220, transcript variant X3	39	62	169	-24.37	miRNA: 3' acuuguaAGUUGCGACAGCCACUc 5' ***::**|::|:|:|||||||||* target: 5' gttgttcTTGATGTTGTCGGTGAc 3'	41	64	-29.7	0.004371	target: 5' UUCUUGAUGUUGUCGGUGAC 3' |||**:|:|:|||||||||* miRNA: 3' AAG--UUGCGACAGCCACUC 5'	no
lcr-miR-N221	rna-XM_010741069.3	gene-hes4	hes4	hes family bHLH transcription factor 4, transcript variant X1	229	250	167	-25.09	miRNA: 3' acUUGUAAGUUGCGACAGCCACUc 5' **||||||:::*|**||||||||| target: 5' ccAACATTTGGAG--GTCGGTGAg 3'	230	253	-28.2	0.005621	target: 5' UUUGGAG--GUCGGUGAGA 3' ||:::*|**|||||||||* miRNA: 3' AAGUUGCGACAGCCACUC- 5'	no
lcr-miR-N221	rna-XM_019255180.2	gene-LOC104924661	LOC104924661	putative testis-specific Y-encoded-like protein 3, transcript variant X3	334	359	168	-28.75	miRNA: 3' acUUGUAAGU-UGCG-ACAGCCACUc 5' **|:|*|*:|*||||*|||||||||| target: 5' acAGCCTCTACACGCATGTCGGTGAg 3'	322	345	-33.5	0.002317	target: 5' CGCACAACAGCCUCUACACGCAUGUCGGUGAGA 3' **||*************||||*||||||||||* miRNA: 3' AAGU-------------UGCG-ACAGCCACUC- 5'	no
lcr-miR-N221	rna-XM_019277577.2	gene-unc80	unc80	unc-80 homolog, NALCN channel complex subunit, transcript variant X13	403	427	171	-32.58	miRNA: 3' acuuGUAAG-UUGCGACAGCCACUc 5' **:*|||||*:|||||||:|||||* target: 5' gagcCATTCTGACGCTGTTGGTGAc 3'	402	425	-36.7	0.000718	target: 5' AUUCUGACGCUGUUGGUGAC 3' ||||*:|||||||:|||||* miRNA: 3' UAAG-UUGCGACAGCCACUC 5'	no
lcr-miR-N221	rna-XM_019258992.2	gene-ccdc18	ccdc18	coiled-coil domain containing 18, transcript variant X1	425	449	161	-28.28	miRNA: 3' acUUGUAA-GUUGCGACAGCCACUc 5' ||:|::||*|*|:|||||:|||||* target: 5' tgGATGTTCCCATGCTGTTGGTGAc 3'	424	447	-33.8	0.0011	target: 5' GUUCCCAUGCUGUUGGUGAC 3' :|||**|:|||||:|||||* miRNA: 3' UAAGU-UGCGACAGCCACUC 5'	no
lcr-miR-N221	rna-XM_019277581.2	gene-unc80	unc80	unc-80 homolog, NALCN channel complex subunit, transcript variant X13	403	427	171	-32.58	miRNA: 3' acuuGUAAG-UUGCGACAGCCACUc 5' **:*|||||*:|||||||:|||||* target: 5' gagcCATTCTGACGCTGTTGGTGAc 3'	402	425	-36.7	0.000718	target: 5' AUUCUGACGCUGUUGGUGAC 3' ||||*:|||||||:|||||* miRNA: 3' UAAG-UUGCGACAGCCACUC 5'	no
lcr-miR-N221	rna-XM_019277584.2	gene-unc80	unc80	unc-80 homolog, NALCN channel complex subunit, transcript variant X13	403	427	171	-32.58	miRNA: 3' acuuGUAAG-UUGCGACAGCCACUc 5' **:*|||||*:|||||||:|||||* target: 5' gagcCATTCTGACGCTGTTGGTGAc 3'	402	425	-36.7	0.000718	target: 5' AUUCUGACGCUGUUGGUGAC 3' ||||*:|||||||:|||||* miRNA: 3' UAAG-UUGCGACAGCCACUC 5'	no
lcr-miR-N221	rna-XM_010742583.3	gene-igfbp2	igfbp2	insulin like growth factor binding protein 2	259	284	162	-25.52	miRNA: 3' acUUGUAAGUUG-CG--ACAGCCACUc 5' |*:||:*|||:|*||**|||||||||* target: 5' taGACG-TCAGCTGCAGTGTCGGTGAc 3'	260	283	-29.4	0.003153	target: 5' -UCAGCUGCAGUGUCGGUGAC 3' *|||:|*||**|||||||||* miRNA: 3' AAGUUG-CG--ACAGCCACUC 5'	no
lcr-miR-N221	rna-XM_019260192.2	gene-kidins220	kidins220	kinase D interacting substrate 220, transcript variant X3	39	62	169	-24.37	miRNA: 3' acuuguaAGUUGCGACAGCCACUc 5' ***::**|::|:|:|||||||||* target: 5' gttgttcTTGATGTTGTCGGTGAc 3'	41	64	-29.7	0.004371	target: 5' UUCUUGAUGUUGUCGGUGAC 3' |||**:|:|:|||||||||* miRNA: 3' AAG--UUGCGACAGCCACUC 5'	no
lcr-miR-N221	rna-XM_019276000.2	gene-nol6	nol6	nucleolar protein 6	167	193	164	-22.24	miRNA: 3' acUUGUAAGU-UGCGAC--AGCCACUc 5' *||*||*|||*|:|:||**|||||||* target: 5' agACCAATCACATGTTGTTTCGGTGAa 3'	167	190	-26.1	0.005894	target: 5' AUCACAUGUUGUUUCGGUGAA 3' *|||*|:|:||**|||||||* miRNA: 3' AAGU-UGCGAC--AGCCACUC 5'	no
lcr-miR-N221	rna-XM_019277579.2	gene-unc80	unc80	unc-80 homolog, NALCN channel complex subunit, transcript variant X13	403	427	171	-32.58	miRNA: 3' acuuGUAAG-UUGCGACAGCCACUc 5' **:*|||||*:|||||||:|||||* target: 5' gagcCATTCTGACGCTGTTGGTGAc 3'	402	425	-36.7	0.000718	target: 5' AUUCUGACGCUGUUGGUGAC 3' ||||*:|||||||:|||||* miRNA: 3' UAAG-UUGCGACAGCCACUC 5'	no
lcr-miR-N221	rna-XM_019277589.2	gene-unc80	unc80	unc-80 homolog, NALCN channel complex subunit, transcript variant X13	403	427	171	-32.58	miRNA: 3' acuuGUAAG-UUGCGACAGCCACUc 5' **:*|||||*:|||||||:|||||* target: 5' gagcCATTCTGACGCTGTTGGTGAc 3'	402	425	-36.7	0.000717	target: 5' AUUCUGACGCUGUUGGUGAC 3' ||||*:|||||||:|||||* miRNA: 3' UAAG-UUGCGACAGCCACUC 5'	no
lcr-miR-N228	rna-XM_019275755.2	gene-stard13	stard13	StAR related lipid transfer domain containing 13, transcript variant X1	1735	1756	164	-32.99	miRNA: 3' ugACUCCUCGAUACUGGUUCAg 5' :|||||*||||:*|||||:||| target: 5' gcTGAGTAGCTGAGACCAGGTc 3'	1733	1754	-36.4	0.000776	target: 5' GUAGCUGAGACCAGGUCU 3' |*||||:*|||||:|||* miRNA: 3' CCUCGAUACUGGUUCAG- 5'	no
lcr-miR-N228	rna-XM_010729684.3	gene-rac1	rac1	Rac family small GTPase 1	1259	1280	166	-26.17	miRNA: 3' ugacUCCUCGAUACUGGUUCAg 5' ****||||||*||||:|||||: target: 5' tgaaAGGAGCAATGATCAAGTt 3'	1256	1277	-31	0.007062	target: 5' AGGAGCAAUGAUCAAGUUG 3' *|||||*||||:|||||:* miRNA: 3' -CCUCGAUACUGGUUCAG- 5'	no
lcr-miR-N228	rna-XM_027285346.1	gene-LOC104925606	LOC104925606	phosphoribosyl pyrophosphate synthase-associated protein 1, transcript variant X3	2235	2256	200	-44.95	miRNA: 3' ugACUCCUCGAUACUGGUUCAg 5' |||||||||||||||||||||| target: 5' acTGAGGAGCTATGACCAAGTc 3'	2232	2253	-47.8	3.9e-05	target: 5' GGAGCUAUGACCAAGUCU 3' |||||||||||||||||* miRNA: 3' CCUCGAUACUGGUUCAG- 5'	no
lcr-miR-N228	rna-XM_019275320.2	gene-celf4	celf4	CUGBP Elav-like family member 4, transcript variant X5	2562	2584	162	-31.11	miRNA: 3' ugaCUC-CUCGAUACUGGUUCAg 5' |**|||*||||*||||||:|||| target: 5' agaGAGAGAGCGATGACCGAGTc 3'	2562	2583	-34.9	0.005247	target: 5' AGAGCGAUGACCGAGUCA 3' *||||*||||||:||||* miRNA: 3' -CUCGAUACUGGUUCAG- 5'	no
lcr-miR-N228	rna-XM_019263800.2	gene-LOC104925043	LOC104925043	pyruvate kinase PKM, transcript variant X2	806	826	169	-24.99	miRNA: 3' ugaCUCCUCGAUACUGGUUCAg 5' *|*||||*|:|*|||||||||: target: 5' tcaGAGGTGTT-TGACCAAGTt 3'	808	829	-29.9	0.009232	target: 5' GUGUU-UGACCAAGUUA 3' |*|:|*|||||||||:* miRNA: 3' CUCGAUACUGGUUCAG- 5'	no
lcr-miR-N228	rna-XM_019275756.2	gene-stard13	stard13	StAR related lipid transfer domain containing 13, transcript variant X1	1735	1756	164	-32.99	miRNA: 3' ugACUCCUCGAUACUGGUUCAg 5' :|||||*||||:*|||||:||| target: 5' gcTGAGTAGCTGAGACCAGGTc 3'	1733	1754	-36.4	0.000776	target: 5' GUAGCUGAGACCAGGUCU 3' |*||||:*|||||:|||* miRNA: 3' CCUCGAUACUGGUUCAG- 5'	no
lcr-miR-N228	rna-XM_010739929.3	gene-LOC104926138	LOC104926138	toll-like receptor 5	31	52	172	-24.45	miRNA: 3' ugacucCUCGAUACUGGUUCAg 5' *:****||*||||||||||||: target: 5' ttctctGATCTATGACCAAGTt 3'	34	55	-27.7	0.002508	target: 5' ---CUAUGACCAAGUUA 3' ***||||||||||||:* miRNA: 3' CUCGAUACUGGUUCAG- 5'	no
lcr-miR-N228	rna-XM_027289786.1	gene-stard13	stard13	StAR related lipid transfer domain containing 13, transcript variant X1	1735	1756	164	-32.99	miRNA: 3' ugACUCCUCGAUACUGGUUCAg 5' :|||||*||||:*|||||:||| target: 5' gcTGAGTAGCTGAGACCAGGTc 3'	1733	1754	-36.4	0.000776	target: 5' GUAGCUGAGACCAGGUCU 3' |*||||:*|||||:|||* miRNA: 3' CCUCGAUACUGGUUCAG- 5'	no
lcr-miR-N228	rna-XM_019275319.2	gene-celf4	celf4	CUGBP Elav-like family member 4, transcript variant X5	2562	2584	162	-31.11	miRNA: 3' ugaCUC-CUCGAUACUGGUUCAg 5' |**|||*||||*||||||:|||| target: 5' agaGAGAGAGCGATGACCGAGTc 3'	2562	2583	-34.9	0.005247	target: 5' AGAGCGAUGACCGAGUCA 3' *||||*||||||:||||* miRNA: 3' -CUCGAUACUGGUUCAG- 5'	no
lcr-miR-N228	rna-XM_010738575.3	gene-LOC104925043	LOC104925043	pyruvate kinase PKM, transcript variant X2	806	826	169	-24.99	miRNA: 3' ugaCUCCUCGAUACUGGUUCAg 5' *|*||||*|:|*|||||||||: target: 5' tcaGAGGTGTT-TGACCAAGTt 3'	808	829	-29.9	0.009232	target: 5' GUGUU-UGACCAAGUUA 3' |*|:|*|||||||||:* miRNA: 3' CUCGAUACUGGUUCAG- 5'	no
lcr-miR-N228	rna-XM_027281973.1	gene-dusp26	dusp26	dual specificity phosphatase 26, transcript variant X1	58	83	161	-27.93	miRNA: 3' ugACU-CCUCGA-UA--CUGGUUCAg 5' |||||*||||*|*||**||||||||: target: 5' acTGAGGGAGGTAATGGGACCAAGTt 3'	57	78	-32.4	0.003999	target: 5' GGGAGGUAAUGGGACCAAGUUA 3' *||||*||****||||||||:* miRNA: 3' -CCUCGAUA---CUGGUUCAG- 5'	no
lcr-miR-N228	rna-XM_027291725.1	gene-LOC113748325	LOC113748325	cyclin-dependent kinase 15-like, transcript variant X2	303	324	163	-25.7	miRNA: 3' ugacuccUCGAUACUGGUUCAg 5' ****:**||*|:|||||||||| target: 5' cactgctAGATGTGACCAAGTc 3'	293	314	-28.9	0.005326	target: 5' GCGUCACUGCUAGAUGUGACCAAGUCC 3' |*|*****|||****:||||||||||* miRNA: 3' C-CU----CGA----UACUGGUUCAG- 5'	no
lcr-miR-N228	rna-XM_010737876.3	gene-LOC104924511	LOC104924511	metalloproteinase inhibitor 3	1508	1529	165	-24.87	miRNA: 3' ugacuCCUCGAUACUGGUUCAg 5' |****|*:|||*|||||||||: target: 5' aaactGTGGCTTTGACCAAGTt 3'	1495	1516	-34.9	0.002734	target: 5' GGACACAAACUGUGGCUUUGACCAAGUUA 3' |||***********|||*|||||||||:* miRNA: 3' CCU-----------CGAUACUGGUUCAG- 5'	no
lcr-miR-N228	rna-XM_010754853.3	gene-sumo1	sumo1	small ubiquitin-like modifier 1	952	976	162	-28.56	miRNA: 3' ugaCUCCUCGAUAC---UGGUUCAg 5' :|*||||||:|:*|***|||||||| target: 5' gcaGAGGAGTTGGGCGCACCAAGTc 3'	951	972	-32.3	0.005545	target: 5' GGAGUUGGGCGCACCAAGUCA 3' ||||:|:***|*||||||||* miRNA: 3' CCUCGAUA--C-UGGUUCAG- 5'	no
lcr-miR-N228	rna-XM_019275314.2	gene-celf4	celf4	CUGBP Elav-like family member 4, transcript variant X5	2562	2584	162	-31.11	miRNA: 3' ugaCUC-CUCGAUACUGGUUCAg 5' |**|||*||||*||||||:|||| target: 5' agaGAGAGAGCGATGACCGAGTc 3'	2562	2583	-34.9	0.005247	target: 5' AGAGCGAUGACCGAGUCA 3' *||||*||||||:||||* miRNA: 3' -CUCGAUACUGGUUCAG- 5'	no
lcr-miR-N228	rna-XM_027288595.1	gene-LOC104919451	LOC104919451	contactin-4, transcript variant X3	500	521	160	-24.16	miRNA: 3' ugacucCUCGAUACUGGUUCAg 5' **|***|||*|:*||||||||* target: 5' catcctGAGGTGGGACCAAGTa 3'	503	524	-28.3	0.006564	target: 5' GUGG---GACCAAGUA 3' |*|****||||||||* miRNA: 3' CUCGAUACUGGUUCAG 5'	no
lcr-miR-N228	rna-XM_027287720.1	gene-LOC104936982	LOC104936982	ras-related protein Rab-38	1295	1316	168	-32.7	miRNA: 3' ugACUCCUCGAUACUGGUUCAg 5' *:|||||||:|:*||:|||||| target: 5' ttTGAGGAGTTGAGATCAAGTc 3'	1258	1279	-33.9	0.002667	target: 5' GAGUUGAGAUCAAGUCA 3' |||:|:*||:||||||* miRNA: 3' CUCGAUACUGGUUCAG- 5'	no
lcr-miR-N228	rna-XM_010749718.2	gene-dusp26	dusp26	dual specificity phosphatase 26, transcript variant X1	58	83	161	-27.93	miRNA: 3' ugACU-CCUCGA-UA--CUGGUUCAg 5' |||||*||||*|*||**||||||||: target: 5' acTGAGGGAGGTAATGGGACCAAGTt 3'	57	78	-32.4	0.003999	target: 5' GGGAGGUAAUGGGACCAAGUUA 3' *||||*||****||||||||:* miRNA: 3' -CCUCGAUA---CUGGUUCAG- 5'	no
lcr-miR-N228	rna-XM_019275309.2	gene-celf4	celf4	CUGBP Elav-like family member 4, transcript variant X5	2562	2584	162	-31.11	miRNA: 3' ugaCUC-CUCGAUACUGGUUCAg 5' |**|||*||||*||||||:|||| target: 5' agaGAGAGAGCGATGACCGAGTc 3'	2562	2583	-34.9	0.005247	target: 5' AGAGCGAUGACCGAGUCA 3' *||||*||||||:||||* miRNA: 3' -CUCGAUACUGGUUCAG- 5'	no
lcr-miR-N228	rna-XM_019275754.2	gene-stard13	stard13	StAR related lipid transfer domain containing 13, transcript variant X1	1735	1756	164	-32.99	miRNA: 3' ugACUCCUCGAUACUGGUUCAg 5' :|||||*||||:*|||||:||| target: 5' gcTGAGTAGCTGAGACCAGGTc 3'	1733	1754	-36.4	0.000776	target: 5' GUAGCUGAGACCAGGUCU 3' |*||||:*|||||:|||* miRNA: 3' CCUCGAUACUGGUUCAG- 5'	no
lcr-miR-N228	rna-XM_019254727.2	gene-LOC104926070	LOC104926070	V-type proton ATPase subunit C 1-B	9	35	165	-27.58	miRNA: 3' ugaCUCCUCG----AU-ACUGGUUCAg 5' |**|||||||****||*|||||||||* target: 5' aaaGAGGAGCCACATAGTGACCAAGTa 3'	11	32	-33	0.000591	target: 5' GAGCCACAUAGUGACCAAGUA 3' ||||******:|||||||||* miRNA: 3' CUCGA-----UACUGGUUCAG 5'	no
lcr-miR-N228	rna-XM_027291726.1	gene-LOC113748325	LOC113748325	cyclin-dependent kinase 15-like, transcript variant X2	303	324	163	-25.7	miRNA: 3' ugacuccUCGAUACUGGUUCAg 5' ****:**||*|:|||||||||| target: 5' cactgctAGATGTGACCAAGTc 3'	293	314	-28.9	0.005326	target: 5' GCGUCACUGCUAGAUGUGACCAAGUCC 3' |*|*****|||****:||||||||||* miRNA: 3' C-CU----CGA----UACUGGUUCAG- 5'	no
lcr-miR-N228	rna-XM_010750774.3	gene-crls1	crls1	cardiolipin synthase 1	112	135	169	-22.78	miRNA: 3' ugacUCCUCGAUAC--UGGUUCAg 5' ****|||||||*||**|||||||* target: 5' cgccAGGAGCTCTGAAACCAAGTa 3'	115	136	-27.5	0.007946	target: 5' GAGCUCUGAAACCAAGUA 3' |||||*|||**||||||* miRNA: 3' CUCGAUACU--GGUUCAG 5'	no
lcr-miR-N228	rna-XM_019265947.2	gene-tcf20	tcf20	transcription factor 20, transcript variant X1	1631	1652	188	-34.77	miRNA: 3' ugACUCCUCGAUACUGGUUCAg 5' *:|||||||:||*||||||||| target: 5' ttTGAGGAGTTAAGACCAAGTc 3'	1630	1651	-38.4	0.001169	target: 5' GAGUUAAGACCAAGUCA 3' |||:||*|||||||||* miRNA: 3' CUCGAUACUGGUUCAG- 5'	no
lcr-miR-N228	rna-XM_019275318.2	gene-celf4	celf4	CUGBP Elav-like family member 4, transcript variant X5	2562	2584	162	-31.11	miRNA: 3' ugaCUC-CUCGAUACUGGUUCAg 5' |**|||*||||*||||||:|||| target: 5' agaGAGAGAGCGATGACCGAGTc 3'	2562	2583	-34.9	0.005247	target: 5' AGAGCGAUGACCGAGUCA 3' *||||*||||||:||||* miRNA: 3' -CUCGAUACUGGUUCAG- 5'	no
lcr-miR-N228	rna-XM_027273285.1	gene-LOC113744309	LOC113744309	uncharacterized LOC113744309	456	476	162	-28.4	miRNA: 3' ugACUCCUCGAUACUGGUUCAg 5' :|||*||*||**|||||||||| target: 5' gcTGTGG-GCGTTGACCAAGTc 3'	455	476	-32.8	0.005032	target: 5' GG-GCGUUGACCAAGUCU 3' ||*||**||||||||||* miRNA: 3' CCUCGAUACUGGUUCAG- 5'	no
lcr-miR-N228	rna-XM_010738573.3	gene-LOC104925043	LOC104925043	pyruvate kinase PKM, transcript variant X2	806	826	169	-24.99	miRNA: 3' ugaCUCCUCGAUACUGGUUCAg 5' *|*||||*|:|*|||||||||: target: 5' tcaGAGGTGTT-TGACCAAGTt 3'	808	829	-29.9	0.009232	target: 5' GUGUU-UGACCAAGUUA 3' |*|:|*|||||||||:* miRNA: 3' CUCGAUACUGGUUCAG- 5'	no
lcr-miR-N228	rna-XM_019275310.2	gene-celf4	celf4	CUGBP Elav-like family member 4, transcript variant X5	2562	2584	162	-31.11	miRNA: 3' ugaCUC-CUCGAUACUGGUUCAg 5' |**|||*||||*||||||:|||| target: 5' agaGAGAGAGCGATGACCGAGTc 3'	2562	2583	-34.9	0.005247	target: 5' AGAGCGAUGACCGAGUCA 3' *||||*||||||:||||* miRNA: 3' -CUCGAUACUGGUUCAG- 5'	no
lcr-miR-N229	rna-XM_019263800.2	gene-LOC104925043	LOC104925043	pyruvate kinase PKM, transcript variant X2	806	826	169	-24.99	miRNA: 3' ugaCUCCUCGAUACUGGUUCAg 5' *|*||||*|:|*|||||||||: target: 5' tcaGAGGTGTT-TGACCAAGTt 3'	808	829	-29.9	0.009232	target: 5' GUGUU-UGACCAAGUUA 3' |*|:|*|||||||||:* miRNA: 3' CUCGAUACUGGUUCAG- 5'	no
lcr-miR-N229	rna-XM_019275310.2	gene-celf4	celf4	CUGBP Elav-like family member 4, transcript variant X5	2562	2584	162	-31.11	miRNA: 3' ugaCUC-CUCGAUACUGGUUCAg 5' |**|||*||||*||||||:|||| target: 5' agaGAGAGAGCGATGACCGAGTc 3'	2562	2583	-34.9	0.005247	target: 5' AGAGCGAUGACCGAGUCA 3' *||||*||||||:||||* miRNA: 3' -CUCGAUACUGGUUCAG- 5'	no
lcr-miR-N229	rna-XM_019275755.2	gene-stard13	stard13	StAR related lipid transfer domain containing 13, transcript variant X1	1735	1756	164	-32.99	miRNA: 3' ugACUCCUCGAUACUGGUUCAg 5' :|||||*||||:*|||||:||| target: 5' gcTGAGTAGCTGAGACCAGGTc 3'	1733	1754	-36.4	0.000776	target: 5' GUAGCUGAGACCAGGUCU 3' |*||||:*|||||:|||* miRNA: 3' CCUCGAUACUGGUUCAG- 5'	no
lcr-miR-N229	rna-XM_010749718.2	gene-dusp26	dusp26	dual specificity phosphatase 26, transcript variant X1	58	83	161	-27.93	miRNA: 3' ugACU-CCUCGA-UA--CUGGUUCAg 5' |||||*||||*|*||**||||||||: target: 5' acTGAGGGAGGTAATGGGACCAAGTt 3'	57	78	-32.4	0.003999	target: 5' GGGAGGUAAUGGGACCAAGUUA 3' *||||*||****||||||||:* miRNA: 3' -CCUCGAUA---CUGGUUCAG- 5'	no
lcr-miR-N229	rna-XM_019265947.2	gene-tcf20	tcf20	transcription factor 20, transcript variant X1	1631	1652	188	-34.77	miRNA: 3' ugACUCCUCGAUACUGGUUCAg 5' *:|||||||:||*||||||||| target: 5' ttTGAGGAGTTAAGACCAAGTc 3'	1630	1651	-38.4	0.001169	target: 5' GAGUUAAGACCAAGUCA 3' |||:||*|||||||||* miRNA: 3' CUCGAUACUGGUUCAG- 5'	no
lcr-miR-N229	rna-XM_010737876.3	gene-LOC104924511	LOC104924511	metalloproteinase inhibitor 3	1508	1529	165	-24.87	miRNA: 3' ugacuCCUCGAUACUGGUUCAg 5' |****|*:|||*|||||||||: target: 5' aaactGTGGCTTTGACCAAGTt 3'	1495	1516	-34.9	0.002734	target: 5' GGACACAAACUGUGGCUUUGACCAAGUUA 3' |||***********|||*|||||||||:* miRNA: 3' CCU-----------CGAUACUGGUUCAG- 5'	no
lcr-miR-N229	rna-XM_010750774.3	gene-crls1	crls1	cardiolipin synthase 1	112	135	169	-22.78	miRNA: 3' ugacUCCUCGAUAC--UGGUUCAg 5' ****|||||||*||**|||||||* target: 5' cgccAGGAGCTCTGAAACCAAGTa 3'	115	136	-27.5	0.007946	target: 5' GAGCUCUGAAACCAAGUA 3' |||||*|||**||||||* miRNA: 3' CUCGAUACU--GGUUCAG 5'	no
lcr-miR-N229	rna-XM_027287720.1	gene-LOC104936982	LOC104936982	ras-related protein Rab-38	1295	1316	168	-32.7	miRNA: 3' ugACUCCUCGAUACUGGUUCAg 5' *:|||||||:|:*||:|||||| target: 5' ttTGAGGAGTTGAGATCAAGTc 3'	1258	1279	-33.9	0.002667	target: 5' GAGUUGAGAUCAAGUCA 3' |||:|:*||:||||||* miRNA: 3' CUCGAUACUGGUUCAG- 5'	no
lcr-miR-N229	rna-XM_027289786.1	gene-stard13	stard13	StAR related lipid transfer domain containing 13, transcript variant X1	1735	1756	164	-32.99	miRNA: 3' ugACUCCUCGAUACUGGUUCAg 5' :|||||*||||:*|||||:||| target: 5' gcTGAGTAGCTGAGACCAGGTc 3'	1733	1754	-36.4	0.000776	target: 5' GUAGCUGAGACCAGGUCU 3' |*||||:*|||||:|||* miRNA: 3' CCUCGAUACUGGUUCAG- 5'	no
lcr-miR-N229	rna-XM_019275756.2	gene-stard13	stard13	StAR related lipid transfer domain containing 13, transcript variant X1	1735	1756	164	-32.99	miRNA: 3' ugACUCCUCGAUACUGGUUCAg 5' :|||||*||||:*|||||:||| target: 5' gcTGAGTAGCTGAGACCAGGTc 3'	1733	1754	-36.4	0.000776	target: 5' GUAGCUGAGACCAGGUCU 3' |*||||:*|||||:|||* miRNA: 3' CCUCGAUACUGGUUCAG- 5'	no
lcr-miR-N229	rna-XM_019275318.2	gene-celf4	celf4	CUGBP Elav-like family member 4, transcript variant X5	2562	2584	162	-31.11	miRNA: 3' ugaCUC-CUCGAUACUGGUUCAg 5' |**|||*||||*||||||:|||| target: 5' agaGAGAGAGCGATGACCGAGTc 3'	2562	2583	-34.9	0.005247	target: 5' AGAGCGAUGACCGAGUCA 3' *||||*||||||:||||* miRNA: 3' -CUCGAUACUGGUUCAG- 5'	no
lcr-miR-N229	rna-XM_010729684.3	gene-rac1	rac1	Rac family small GTPase 1	1259	1280	166	-26.17	miRNA: 3' ugacUCCUCGAUACUGGUUCAg 5' ****||||||*||||:|||||: target: 5' tgaaAGGAGCAATGATCAAGTt 3'	1256	1277	-31	0.007062	target: 5' AGGAGCAAUGAUCAAGUUG 3' *|||||*||||:|||||:* miRNA: 3' -CCUCGAUACUGGUUCAG- 5'	no
lcr-miR-N229	rna-XM_027291725.1	gene-LOC113748325	LOC113748325	cyclin-dependent kinase 15-like, transcript variant X2	303	324	163	-25.7	miRNA: 3' ugacuccUCGAUACUGGUUCAg 5' ****:**||*|:|||||||||| target: 5' cactgctAGATGTGACCAAGTc 3'	293	314	-28.9	0.005326	target: 5' GCGUCACUGCUAGAUGUGACCAAGUCC 3' |*|*****|||****:||||||||||* miRNA: 3' C-CU----CGA----UACUGGUUCAG- 5'	no
lcr-miR-N229	rna-XM_010738575.3	gene-LOC104925043	LOC104925043	pyruvate kinase PKM, transcript variant X2	806	826	169	-24.99	miRNA: 3' ugaCUCCUCGAUACUGGUUCAg 5' *|*||||*|:|*|||||||||: target: 5' tcaGAGGTGTT-TGACCAAGTt 3'	808	829	-29.9	0.009232	target: 5' GUGUU-UGACCAAGUUA 3' |*|:|*|||||||||:* miRNA: 3' CUCGAUACUGGUUCAG- 5'	no
lcr-miR-N229	rna-XM_027288595.1	gene-LOC104919451	LOC104919451	contactin-4, transcript variant X3	500	521	160	-24.16	miRNA: 3' ugacucCUCGAUACUGGUUCAg 5' **|***|||*|:*||||||||* target: 5' catcctGAGGTGGGACCAAGTa 3'	503	524	-28.3	0.006564	target: 5' GUGG---GACCAAGUA 3' |*|****||||||||* miRNA: 3' CUCGAUACUGGUUCAG 5'	no
lcr-miR-N229	rna-XM_010754853.3	gene-sumo1	sumo1	small ubiquitin-like modifier 1	952	976	162	-28.56	miRNA: 3' ugaCUCCUCGAUAC---UGGUUCAg 5' :|*||||||:|:*|***|||||||| target: 5' gcaGAGGAGTTGGGCGCACCAAGTc 3'	951	972	-32.3	0.005545	target: 5' GGAGUUGGGCGCACCAAGUCA 3' ||||:|:***|*||||||||* miRNA: 3' CCUCGAUA--C-UGGUUCAG- 5'	no
lcr-miR-N229	rna-XM_027291726.1	gene-LOC113748325	LOC113748325	cyclin-dependent kinase 15-like, transcript variant X2	303	324	163	-25.7	miRNA: 3' ugacuccUCGAUACUGGUUCAg 5' ****:**||*|:|||||||||| target: 5' cactgctAGATGTGACCAAGTc 3'	293	314	-28.9	0.005326	target: 5' GCGUCACUGCUAGAUGUGACCAAGUCC 3' |*|*****|||****:||||||||||* miRNA: 3' C-CU----CGA----UACUGGUUCAG- 5'	no
lcr-miR-N229	rna-XM_027285346.1	gene-LOC104925606	LOC104925606	phosphoribosyl pyrophosphate synthase-associated protein 1, transcript variant X3	2235	2256	200	-44.95	miRNA: 3' ugACUCCUCGAUACUGGUUCAg 5' |||||||||||||||||||||| target: 5' acTGAGGAGCTATGACCAAGTc 3'	2232	2253	-47.8	3.9e-05	target: 5' GGAGCUAUGACCAAGUCU 3' |||||||||||||||||* miRNA: 3' CCUCGAUACUGGUUCAG- 5'	no
lcr-miR-N229	rna-XM_019275314.2	gene-celf4	celf4	CUGBP Elav-like family member 4, transcript variant X5	2562	2584	162	-31.11	miRNA: 3' ugaCUC-CUCGAUACUGGUUCAg 5' |**|||*||||*||||||:|||| target: 5' agaGAGAGAGCGATGACCGAGTc 3'	2562	2583	-34.9	0.005247	target: 5' AGAGCGAUGACCGAGUCA 3' *||||*||||||:||||* miRNA: 3' -CUCGAUACUGGUUCAG- 5'	no
lcr-miR-N229	rna-XM_027273285.1	gene-LOC113744309	LOC113744309	uncharacterized LOC113744309	456	476	162	-28.4	miRNA: 3' ugACUCCUCGAUACUGGUUCAg 5' :|||*||*||**|||||||||| target: 5' gcTGTGG-GCGTTGACCAAGTc 3'	455	476	-32.8	0.005032	target: 5' GG-GCGUUGACCAAGUCU 3' ||*||**||||||||||* miRNA: 3' CCUCGAUACUGGUUCAG- 5'	no
lcr-miR-N229	rna-XM_019275320.2	gene-celf4	celf4	CUGBP Elav-like family member 4, transcript variant X5	2562	2584	162	-31.11	miRNA: 3' ugaCUC-CUCGAUACUGGUUCAg 5' |**|||*||||*||||||:|||| target: 5' agaGAGAGAGCGATGACCGAGTc 3'	2562	2583	-34.9	0.005247	target: 5' AGAGCGAUGACCGAGUCA 3' *||||*||||||:||||* miRNA: 3' -CUCGAUACUGGUUCAG- 5'	no
lcr-miR-N229	rna-XM_019275309.2	gene-celf4	celf4	CUGBP Elav-like family member 4, transcript variant X5	2562	2584	162	-31.11	miRNA: 3' ugaCUC-CUCGAUACUGGUUCAg 5' |**|||*||||*||||||:|||| target: 5' agaGAGAGAGCGATGACCGAGTc 3'	2562	2583	-34.9	0.005247	target: 5' AGAGCGAUGACCGAGUCA 3' *||||*||||||:||||* miRNA: 3' -CUCGAUACUGGUUCAG- 5'	no
lcr-miR-N229	rna-XM_019275319.2	gene-celf4	celf4	CUGBP Elav-like family member 4, transcript variant X5	2562	2584	162	-31.11	miRNA: 3' ugaCUC-CUCGAUACUGGUUCAg 5' |**|||*||||*||||||:|||| target: 5' agaGAGAGAGCGATGACCGAGTc 3'	2562	2583	-34.9	0.005247	target: 5' AGAGCGAUGACCGAGUCA 3' *||||*||||||:||||* miRNA: 3' -CUCGAUACUGGUUCAG- 5'	no
lcr-miR-N229	rna-XM_010738573.3	gene-LOC104925043	LOC104925043	pyruvate kinase PKM, transcript variant X2	806	826	169	-24.99	miRNA: 3' ugaCUCCUCGAUACUGGUUCAg 5' *|*||||*|:|*|||||||||: target: 5' tcaGAGGTGTT-TGACCAAGTt 3'	808	829	-29.9	0.009232	target: 5' GUGUU-UGACCAAGUUA 3' |*|:|*|||||||||:* miRNA: 3' CUCGAUACUGGUUCAG- 5'	no
lcr-miR-N229	rna-XM_010739929.3	gene-LOC104926138	LOC104926138	toll-like receptor 5	31	52	172	-24.45	miRNA: 3' ugacucCUCGAUACUGGUUCAg 5' *:****||*||||||||||||: target: 5' ttctctGATCTATGACCAAGTt 3'	34	55	-27.7	0.002508	target: 5' ---CUAUGACCAAGUUA 3' ***||||||||||||:* miRNA: 3' CUCGAUACUGGUUCAG- 5'	no
lcr-miR-N229	rna-XM_019254727.2	gene-LOC104926070	LOC104926070	V-type proton ATPase subunit C 1-B	9	35	165	-27.58	miRNA: 3' ugaCUCCUCG----AU-ACUGGUUCAg 5' |**|||||||****||*|||||||||* target: 5' aaaGAGGAGCCACATAGTGACCAAGTa 3'	11	32	-33	0.000591	target: 5' GAGCCACAUAGUGACCAAGUA 3' ||||******:|||||||||* miRNA: 3' CUCGA-----UACUGGUUCAG 5'	no
lcr-miR-N229	rna-XM_027281973.1	gene-dusp26	dusp26	dual specificity phosphatase 26, transcript variant X1	58	83	161	-27.93	miRNA: 3' ugACU-CCUCGA-UA--CUGGUUCAg 5' |||||*||||*|*||**||||||||: target: 5' acTGAGGGAGGTAATGGGACCAAGTt 3'	57	78	-32.4	0.003999	target: 5' GGGAGGUAAUGGGACCAAGUUA 3' *||||*||****||||||||:* miRNA: 3' -CCUCGAUA---CUGGUUCAG- 5'	no
lcr-miR-N229	rna-XM_019275754.2	gene-stard13	stard13	StAR related lipid transfer domain containing 13, transcript variant X1	1735	1756	164	-32.99	miRNA: 3' ugACUCCUCGAUACUGGUUCAg 5' :|||||*||||:*|||||:||| target: 5' gcTGAGTAGCTGAGACCAGGTc 3'	1733	1754	-36.4	0.000776	target: 5' GUAGCUGAGACCAGGUCU 3' |*||||:*|||||:|||* miRNA: 3' CCUCGAUACUGGUUCAG- 5'	no
lcr-miR-N275	rna-XM_027281197.1	gene-shank2	shank2	SH3 and multiple ankyrin repeat domains 2, transcript variant X2	827	846	165	-28.28	miRNA: 3' gcaagaaCCGCUCCUGUGCa 5' ****|**||||||||||||* target: 5' gaaccgaGGCGAGGACACGa 3'	833	852	-31.7	0.004574	target: 5' AGGCGAGGACACGA 3' *||||||||||||* miRNA: 3' ACCGCUCCUGUGCA 5'	no
lcr-miR-N275	rna-XM_027281203.1	gene-shank2	shank2	SH3 and multiple ankyrin repeat domains 2, transcript variant X2	827	846	165	-28.28	miRNA: 3' gcaagaaCCGCUCCUGUGCa 5' ****|**||||||||||||* target: 5' gaaccgaGGCGAGGACACGa 3'	833	852	-31.7	0.004574	target: 5' AGGCGAGGACACGA 3' *||||||||||||* miRNA: 3' ACCGCUCCUGUGCA 5'	no
lcr-miR-N275	rna-XM_027273483.1	gene-c2cd2l	c2cd2l	C2CD2 like	145	164	174	-30.13	miRNA: 3' gcAAGAACCGCUCCUGUGCa 5' **|*||*||||||||||||* target: 5' gcTGCTCGGCGAGGACACGa 3'	148	167	-32.1	0.001584	target: 5' CGGCGAGGACACGA 3' *||||||||||||* miRNA: 3' ACCGCUCCUGUGCA 5'	no
lcr-miR-N275	rna-XM_027281198.1	gene-shank2	shank2	SH3 and multiple ankyrin repeat domains 2, transcript variant X2	827	846	165	-28.28	miRNA: 3' gcaagaaCCGCUCCUGUGCa 5' ****|**||||||||||||* target: 5' gaaccgaGGCGAGGACACGa 3'	833	852	-31.7	0.004574	target: 5' AGGCGAGGACACGA 3' *||||||||||||* miRNA: 3' ACCGCUCCUGUGCA 5'	no
lcr-miR-N275	rna-XM_010743318.3	gene-LOC104928930	LOC104928930	uncharacterized LOC104928930, transcript variant X3	828	847	166	-27.43	miRNA: 3' gcaagaACCGCUCCUGUGCa 5' |*|***|||:|||||||||* target: 5' catgaaTGGTGAGGACACGc 3'	833	852	-30.4	0.00787	target: 5' UGGUGAGGACACGC 3' |||:|||||||||* miRNA: 3' ACCGCUCCUGUGCA 5'	no
lcr-miR-N275	rna-XM_027281202.1	gene-shank2	shank2	SH3 and multiple ankyrin repeat domains 2, transcript variant X2	827	846	165	-28.28	miRNA: 3' gcaagaaCCGCUCCUGUGCa 5' ****|**||||||||||||* target: 5' gaaccgaGGCGAGGACACGa 3'	833	852	-31.7	0.004574	target: 5' AGGCGAGGACACGA 3' *||||||||||||* miRNA: 3' ACCGCUCCUGUGCA 5'	no
lcr-miR-N275	rna-XM_027272498.1	gene-LOC104926800	LOC104926800	zinc finger protein AEBP2-like	168	187	160	-24.25	miRNA: 3' gcaaGAACCGCUCCUGUGCa 5' :|**:||**||||||||||| target: 5' tgagTTTACCGAGGACACGt 3'	170	189	-27.4	0.006979	target: 5' C--CGAGGACACGUA 3' ***|||||||||||* miRNA: 3' ACCGCUCCUGUGCA- 5'	no
lcr-miR-N275	rna-XM_019275303.2	gene-LOC104928930	LOC104928930	uncharacterized LOC104928930, transcript variant X3	828	847	166	-27.43	miRNA: 3' gcaagaACCGCUCCUGUGCa 5' |*|***|||:|||||||||* target: 5' catgaaTGGTGAGGACACGc 3'	833	852	-30.4	0.00787	target: 5' UGGUGAGGACACGC 3' |||:|||||||||* miRNA: 3' ACCGCUCCUGUGCA 5'	no
lcr-miR-N275	rna-XM_027281199.1	gene-shank2	shank2	SH3 and multiple ankyrin repeat domains 2, transcript variant X2	827	846	165	-28.28	miRNA: 3' gcaagaaCCGCUCCUGUGCa 5' ****|**||||||||||||* target: 5' gaaccgaGGCGAGGACACGa 3'	833	852	-31.7	0.004574	target: 5' AGGCGAGGACACGA 3' *||||||||||||* miRNA: 3' ACCGCUCCUGUGCA 5'	no
lcr-miR-N275	rna-XM_010752834.3	gene-rpn2	rpn2	ribophorin II, transcript variant X1	196	213	162	-28.72	miRNA: 3' gcaAGAACCGCUCCUGUGCa 5' ***|||**|||||||||||* target: 5' gcgTCT--GCGAGGACACGa 3'	198	217	-29.2	0.004922	target: 5' --GCGAGGACACGA 3' **|||||||||||* miRNA: 3' ACCGCUCCUGUGCA 5'	no
lcr-miR-N275	rna-XM_027281200.1	gene-shank2	shank2	SH3 and multiple ankyrin repeat domains 2, transcript variant X2	827	846	165	-28.28	miRNA: 3' gcaagaaCCGCUCCUGUGCa 5' ****|**||||||||||||* target: 5' gaaccgaGGCGAGGACACGa 3'	833	852	-31.7	0.004574	target: 5' AGGCGAGGACACGA 3' *||||||||||||* miRNA: 3' ACCGCUCCUGUGCA 5'	no
lcr-miR-N308	rna-XM_010752721.3	gene-tbc1d25	tbc1d25	TBC1 domain family member 25	249	268	177	-31.17	miRNA: 3' ucUCAACGUGUCUUGGUAGGu 5' :*:|||||*|||||||||||| target: 5' gtGGTTGC-CAGAACCATCCa 3'	250	270	-35.3	0.00389	target: 5' GC-CAGAACCAUCCAA 3' ||*||||||||||||* miRNA: 3' CGUGUCUUGGUAGGU- 5'	no
lcr-miR-N308	rna-XM_010730686.3	gene-ciao3	ciao3	cytosolic iron-sulfur assembly component 3	60	81	160	-28.16	miRNA: 3' ucucAACG-UGUCUUGGUAGGu 5' |***||||*||||||||:|||| target: 5' atttTTGCTACAGAACCGTCCa 3'	51	71	-34.8	0.000113	target: 5' UUUAUUUUUGCUACAGAACCGUCCAA 3' ********|||*||||||||:||||* miRNA: 3' --------ACG-UGUCUUGGUAGGU- 5'	no
lcr-miR-N308	rna-XM_010737453.3	gene-cers6	cers6	ceramide synthase 6	24	46	162	-24.09	miRNA: 3' ucucaACG-UGUCU-UGGUAGGu 5' ||***|||*|||||*|||||||| target: 5' agccaTGCTACAGACACCATCCa 3'	21	41	-30.6	0.000917	target: 5' CAUGCUACAGACACCAUCCAU 3' **|||*|||||*||||||||* miRNA: 3' --ACG-UGUCU-UGGUAGGU- 5'	no
lcr-miR-N308	rna-XM_010748277.3	gene-epo	epo	erythropoietin, transcript variant X1	475	495	168	-30.56	miRNA: 3' ucUCAACG-UGUCUUGGUAGGu 5' *|:|||||*||||*|||||||| target: 5' tgGGTTGCAACAG-ACCATCCa 3'	475	495	-33.8	0.001964	target: 5' GCAACAGA-CCAUCCAU 3' ||*|||||*|||||||* miRNA: 3' CG-UGUCUUGGUAGGU- 5'	no
lcr-miR-N308	rna-XM_019268996.2	gene-epo	epo	erythropoietin, transcript variant X1	475	495	168	-30.56	miRNA: 3' ucUCAACG-UGUCUUGGUAGGu 5' *|:|||||*||||*|||||||| target: 5' tgGGTTGCAACAG-ACCATCCa 3'	475	495	-33.8	0.001964	target: 5' GCAACAGA-CCAUCCAU 3' ||*|||||*|||||||* miRNA: 3' CG-UGUCUUGGUAGGU- 5'	no
lcr-miR-N312	rna-XM_010733369.3	gene-LOC104920956	LOC104920956	plasmalemma vesicle-associated protein-like, transcript variant X2	161	183	175	-24.47	miRNA: 3' uuUGGUAGC-UGGCAACUAACAu 5' *||||||:|*||:*||||||||| target: 5' taACCATTGCACTTTTGATTGTa 3'	161	182	-27.6	0.003172	target: 5' UUGCACUUUUGAUUGUAA 3' |:|*||:*|||||||||* miRNA: 3' AGC-UGGCAACUAACAU- 5'	no
lcr-miR-N312	rna-XM_010733368.3	gene-LOC104920956	LOC104920956	plasmalemma vesicle-associated protein-like, transcript variant X2	161	183	175	-24.47	miRNA: 3' uuUGGUAGC-UGGCAACUAACAu 5' *||||||:|*||:*||||||||| target: 5' taACCATTGCACTTTTGATTGTa 3'	161	182	-27.6	0.003172	target: 5' UUGCACUUUUGAUUGUAA 3' |:|*||:*|||||||||* miRNA: 3' AGC-UGGCAACUAACAU- 5'	no
lcr-miR-N312	rna-XM_027278650.1	gene-epha5	epha5	EPH receptor A5, transcript variant X1	106	125	168	-22.31	miRNA: 3' uuuGGUAGCUGGCAACUAACAu 5' ***||||:|||**||||||||| target: 5' cccCCATTGAC--TTGATTGTa 3'	108	129	-26.7	0.009287	target: 5' UUGACU--UGAUUGUAU 3' |:|||:**||||||||* miRNA: 3' AGCUGGCAACUAACAU- 5'	no
lcr-miR-N338	rna-XM_019278017.2	gene-tmem87a	tmem87a	transmembrane protein 87A	1303	1324	192	-30.14	miRNA: 3' ggAAUUAAUCGCAGUAACCAUu 5' |||||||||||*|||||||||| target: 5' ccTTAATTAGCATCATTGGTAa 3'	1301	1322	-33.5	0.003123	target: 5' AUUAGCAUCAUUGGUAAC 3' ||||||*||||||||||* miRNA: 3' UAAUCGCAGUAACCAUU- 5'	no
lcr-miR-N338	rna-XM_019278930.2	gene-brd1	brd1	bromodomain containing 1, transcript variant X2	663	684	192	-30.14	miRNA: 3' ggAAUUAAUCGCAGUAACCAUu 5' |||||||||||*|||||||||| target: 5' ccTTAATTAGCATCATTGGTAa 3'	662	683	-33.5	0.001898	target: 5' AUUAGCAUCAUUGGUAAC 3' ||||||*||||||||||* miRNA: 3' UAAUCGCAGUAACCAUU- 5'	no
lcr-miR-N338	rna-XM_010738651.3	gene-LOC104925106	LOC104925106	AMP deaminase 3, transcript variant X2	615	636	188	-28.46	miRNA: 3' ggAAUUAAUCGCAGUAACCAUu 5' ||||||||||:*|||||||||| target: 5' ccTTAATTAGTATCATTGGTAa 3'	614	635	-32.3	0.001745	target: 5' AUUAGUAUCAUUGGUAAA 3' |||||:*||||||||||* miRNA: 3' UAAUCGCAGUAACCAUU- 5'	no
lcr-miR-N338	rna-XM_010738649.3	gene-LOC104925106	LOC104925106	AMP deaminase 3, transcript variant X2	615	636	188	-28.46	miRNA: 3' ggAAUUAAUCGCAGUAACCAUu 5' ||||||||||:*|||||||||| target: 5' ccTTAATTAGTATCATTGGTAa 3'	614	635	-32.3	0.001745	target: 5' AUUAGUAUCAUUGGUAAA 3' |||||:*||||||||||* miRNA: 3' UAAUCGCAGUAACCAUU- 5'	no
lcr-miR-N338	rna-XM_010744011.3	gene-nipa1	nipa1	NIPA magnesium transporter 1	744	765	188	-28.46	miRNA: 3' ggAAUUAAUCGCAGUAACCAUu 5' ||||||||||:*|||||||||| target: 5' ccTTAATTAGTATCATTGGTAa 3'	743	764	-32	0.002334	target: 5' AUUAGUAUCAUUGGUAAC 3' |||||:*||||||||||* miRNA: 3' UAAUCGCAGUAACCAUU- 5'	no
lcr-miR-N338	rna-XM_019278931.2	gene-brd1	brd1	bromodomain containing 1, transcript variant X2	663	684	192	-30.14	miRNA: 3' ggAAUUAAUCGCAGUAACCAUu 5' |||||||||||*|||||||||| target: 5' ccTTAATTAGCATCATTGGTAa 3'	662	683	-33.5	0.001898	target: 5' AUUAGCAUCAUUGGUAAC 3' ||||||*||||||||||* miRNA: 3' UAAUCGCAGUAACCAUU- 5'	no
lcr-miR-N370	rna-XM_027276437.1	gene-plod3	plod3	procollagen-lysine,2-oxoglutarate 5-dioxygenase 3	87	107	166	-27.3	miRNA: 3' agACUUAUAGUCGUGCCGACAu 5' *|||||*:*||*|||||||||: target: 5' ccTGAACG-CATCACGGCTGTg 3'	87	108	-29.8	0.003821	target: 5' CG-CAUCACGGCUGUGG 3' *:*||*|||||||||:* miRNA: 3' AUAGUCGUGCCGACAU- 5'	no
lcr-miR-N370	rna-XM_027277141.1	gene-LOC104921635	LOC104921635	glycerol-3-phosphate acyltransferase 2, mitochondrial, transcript variant X1	679	701	167	-25.9	miRNA: 3' agACUUAU-AGUCGUGCCGACAu 5' **|*||||*||||||:||||||* target: 5' agTCAATACTCAGCATGGCTGTt 3'	668	689	-29.7	0.009723	target: 5' UGUACAGUCAAUACUCAGCAUGGCUGUU 3' *********||||*||||||:||||||* miRNA: 3' ---------UUAU-AGUCGUGCCGACAU 5'	no
lcr-miR-N370	rna-XM_010753564.3	gene-LOC104937353	LOC104937353	claudin-5	30	53	171	-27.19	miRNA: 3' agACU--UAUAGUCGUGCCGACAu 5' |||||**||*||||::|||||||* target: 5' tcTGAACATTTCAGTGCGGCTGTc 3'	29	50	-34	2.2e-05	target: 5' ACAUUUCAGUGCGGCUGUC 3' |*|**||||::|||||||* miRNA: 3' UAU--AGUCGUGCCGACAU 5'	no
lcr-miR-N370	rna-XM_027282921.1	gene-LOC104927448	LOC104927448	ADAMTS-like protein 3, transcript variant X2	149	170	161	-23.89	miRNA: 3' agacuuauaGUCGUGCCGACAu 5' *||*:****|:||||||||||* target: 5' cctcgccccCGGCACGGCTGTc 3'	157	178	-28.4	0.001306	target: 5' --CCGGCACGGCUGUC 3' ***|:||||||||||* miRNA: 3' AUAGUCGUGCCGACAU 5'	no
lcr-miR-N370	rna-XM_019264518.2	gene-LOC104921635	LOC104921635	glycerol-3-phosphate acyltransferase 2, mitochondrial, transcript variant X1	679	701	167	-25.9	miRNA: 3' agACUUAU-AGUCGUGCCGACAu 5' **|*||||*||||||:||||||* target: 5' agTCAATACTCAGCATGGCTGTt 3'	668	689	-29.7	0.009723	target: 5' UGUACAGUCAAUACUCAGCAUGGCUGUU 3' *********||||*||||||:||||||* miRNA: 3' ---------UUAU-AGUCGUGCCGACAU 5'	no
lcr-miR-N370	rna-XM_027283528.1	gene-steap2	steap2	STEAP2 metalloreductase, transcript variant X1	810	832	161	-27.16	miRNA: 3' agACUUAUAGUCGU--GCCGACAu 5' |||||:*|*|||||**|||||||* target: 5' tcTGAGGA-CAGCATGCGGCTGTc 3'	809	830	-31.1	0.005602	target: 5' GGA-CAGCAUGCGGCUGUC 3' :*|*||||**:|||||||* miRNA: 3' UAUAGUCG--UGCCGACAU 5'	no
lcr-miR-N370	rna-XM_027287023.1	gene-mmgt1	mmgt1	membrane magnesium transporter 1	294	315	164	-26.86	miRNA: 3' agACUUAUAGUCGUGCCGACAu 5' *||||||***:*|||||||||* target: 5' acTGAATCGGGACACGGCTGTc 3'	288	309	-30.3	0.001851	target: 5' ACUGAAUCGGGACACGGCUGUC 3' |****|||:|**|||||||||* miRNA: 3' UA---UAGUC--GUGCCGACAU 5'	no
lcr-miR-N370	rna-XM_019277254.2	gene-tbc1d16	tbc1d16	TBC1 domain family member 16, transcript variant X1	2015	2036	176	-27.83	miRNA: 3' agACUUAUAGUCGUGCCGACAu 5' |:||||*||:||*:|||||||: target: 5' ttTGAAGATTAGGGCGGCTGTg 3'	2012	2033	-31.9	0.009991	target: 5' AGAUUAGGGCGGCUGUGU 3' |*||:||*:|||||||:* miRNA: 3' UAUAGUCGUGCCGACAU- 5'	no
lcr-miR-N370	rna-XM_010745433.3	gene-cdc123	cdc123	cell division cycle 123	718	739	171	-26.16	miRNA: 3' agaCUUAUAGUCGUGCCGACAu 5' *:*|*:||||:||*|||||||* target: 5' gtcGTGTATCGGCTCGGCTGTc 3'	715	736	-30.1	0.009881	target: 5' GUGUAUCGGCUCGGCUGUC 3' **:||||:||*|||||||* miRNA: 3' --UAUAGUCGUGCCGACAU 5'	no
lcr-miR-N370	rna-XM_019254954.2	gene-chd5	chd5	chromodomain helicase DNA binding protein 5, transcript variant X1	1047	1069	163	-29.36	miRNA: 3' agACUUAUAGUCGU-GCCGACAu 5' |:|||||:|:||:|*:||||||| target: 5' ttTGAATGTTAGTAGTGGCTGTa 3'	1045	1066	-33.2	0.003909	target: 5' AUGUUAGUAGUGGCUGUAG 3' ||:|:||:|*:|||||||* miRNA: 3' UAUAGUCGU-GCCGACAU- 5'	no
lcr-miR-N370	rna-XM_019264516.2	gene-LOC104921635	LOC104921635	glycerol-3-phosphate acyltransferase 2, mitochondrial, transcript variant X1	679	701	167	-25.9	miRNA: 3' agACUUAU-AGUCGUGCCGACAu 5' **|*||||*||||||:||||||* target: 5' agTCAATACTCAGCATGGCTGTt 3'	668	689	-29.7	0.009723	target: 5' UGUACAGUCAAUACUCAGCAUGGCUGUU 3' *********||||*||||||:||||||* miRNA: 3' ---------UUAU-AGUCGUGCCGACAU 5'	no
lcr-miR-N370	rna-XM_010748221.3	gene-pigs	pigs	phosphatidylinositol glycan anchor biosynthesis class S	122	144	175	-27.72	miRNA: 3' agACUUAUAGUC-GUGCCGACAu 5' **|||||:||*|*|:|||||||* target: 5' gaTGAATGTCTGCCGCGGCTGTc 3'	123	144	-32	0.000208	target: 5' UGUCUGCCGCGGCUGUC 3' |:||*|*|:|||||||* miRNA: 3' AUAGUC-GUGCCGACAU 5'	no
lcr-miR-N370	rna-XM_027280014.1	gene-mak16	mak16	MAK16 homolog	22	43	160	-24.26	miRNA: 3' agaCUU-AUAGUCGUGCCGACAu 5' ||*|||*|:|*|||*|||||||: target: 5' tcaGAACTGTGAGC-CGGCTGTg 3'	21	42	-28	0.004978	target: 5' ACUGUGAGC-CGGCUGUGA 3' |*|:|*|||*|||||||:* miRNA: 3' U-AUAGUCGUGCCGACAU- 5'	no
lcr-miR-N370	rna-XM_010736011.3	gene-esrp1	esrp1	epithelial splicing regulatory protein 1, transcript variant X1	338	360	167	-30.41	miRNA: 3' agACUUAUAGU-CGUGCCGACAu 5' **|||:|||:|*|||:||||||: target: 5' aaTGAGTATTATGCATGGCTGTg 3'	339	360	-33.6	0.001452	target: 5' UAUUAUGCAUGGCUGUGU 3' |||:|*|||:||||||:* miRNA: 3' AUAGU-CGUGCCGACAU- 5'	no
lcr-miR-N370	rna-XM_010729758.3	gene-LOC104918116	LOC104918116	UPF0577 protein KIAA1324-like	279	300	174	-30.25	miRNA: 3' agacUUAUAGUCGUGCCGACAu 5' ****:||:||||*||||||||* target: 5' agctGATGTCAGAACGGCTGTt 3'	269	290	-31.4	0.001496	target: 5' UUCAAGCUGAUGUCAGAACGGCUGUU 3' *********||:||||*||||||||* miRNA: 3' ---------UAUAGUCGUGCCGACAU 5'	no
lcr-miR-N370	rna-XM_010740693.3	gene-ttc32	ttc32	tetratricopeptide repeat domain 32	88	110	175	-29.7	miRNA: 3' agAC-UUAUAGUCGUGCCGACAu 5' *|||*|||:|::|:||||||||* target: 5' acTGAAATGTTGGTACGGCTGTc 3'	88	109	-33.4	0.000495	target: 5' AUGUUGGUACGGCUGUC 3' ||:|::|:||||||||* miRNA: 3' UAUAGUCGUGCCGACAU 5'	no
lcr-miR-N370	rna-XM_019254953.2	gene-chd5	chd5	chromodomain helicase DNA binding protein 5, transcript variant X1	1047	1069	163	-29.36	miRNA: 3' agACUUAUAGUCGU-GCCGACAu 5' |:|||||:|:||:|*:||||||| target: 5' ttTGAATGTTAGTAGTGGCTGTa 3'	1045	1066	-33.2	0.003909	target: 5' AUGUUAGUAGUGGCUGUAG 3' ||:|:||:|*:|||||||* miRNA: 3' UAUAGUCGU-GCCGACAU- 5'	no
lcr-miR-N370	rna-XM_019269543.2	gene-dennd2d	dennd2d	DENN domain containing 2D, transcript variant X1	104	125	172	-25.74	miRNA: 3' agACUUAUAGUCGUGCCGACAu 5' |*|||||**|*|:||||||||| target: 5' tgTGAATTACTGTACGGCTGTa 3'	105	126	-29	0.001057	target: 5' UUACUGUACGGCUGUAU 3' |**|*|:|||||||||* miRNA: 3' AUAGUCGUGCCGACAU- 5'	no
lcr-miR-N370	rna-XM_027287797.1	gene-LOC104934572	LOC104934572	butyrophilin subfamily 1 member A1	360	381	192	-36.25	miRNA: 3' agACUUAUAGUCGUGCCGACAu 5' *||*|||||||||||||||||| target: 5' acTAAATATCAGCACGGCTGTa 3'	360	381	-38.3	0.000105	target: 5' UAUCAGCACGGCUGUAA 3' ||||||||||||||||* miRNA: 3' AUAGUCGUGCCGACAU- 5'	no
lcr-miR-N370	rna-XM_010741486.3	gene-nab1	nab1	NGFI-A binding protein 1	854	874	166	-28.61	miRNA: 3' agACUUAUAGUCGUGCCGACAu 5' **|||||*|:||||:||||||| target: 5' caTGAAT-TTAGCATGGCTGTa 3'	855	876	-32.6	0.008845	target: 5' U-UUAGCAUGGCUGUAG 3' |*|:||||:|||||||* miRNA: 3' AUAGUCGUGCCGACAU- 5'	no
lcr-miR-N370	rna-XM_027273873.1	gene-LOC113744413	LOC113744413	carbonic anhydrase 4-like	611	632	164	-29.7	miRNA: 3' agacuuAUAGUCGUGCCGACAu 5' ****:*|:*:|||||||||||: target: 5' cacagcTGGTAGCACGGCTGTg 3'	615	636	-31.5	0.003898	target: 5' ---UAGCACGGCUGUGG 3' ***:|||||||||||:* miRNA: 3' AUAGUCGUGCCGACAU- 5'	no
lcr-miR-N370	rna-XM_019273200.2	gene-anapc5	anapc5	anaphase promoting complex subunit 5	185	205	162	-23.17	miRNA: 3' agacuuAUAGUCGUGCCGACAu 5' ***|**||||||*:|||||||* target: 5' gaggttTATCAG-GCGGCTGTc 3'	181	202	-27.5	0.005461	target: 5' GGUUUAUCAG-GCGGCUGUC 3' :***||||||*:|||||||* miRNA: 3' U---AUAGUCGUGCCGACAU 5'	no
lcr-miR-N370	rna-XM_027291709.1	gene-LOC104925737	LOC104925737	gamma-aminobutyric acid receptor subunit alpha-5-like, transcript variant X1	2782	2806	167	-32.45	miRNA: 3' agACUUAUAG---UCGUGCCGACAu 5' *|||:*|:||***|||||||||||| target: 5' acTGGCTGTCACTAGCACGGCTGTa 3'	2780	2801	-34.3	0.005691	target: 5' UGUCACUAGCACGGCUGUAC 3' |:||***||||||||||||* miRNA: 3' AUAG---UCGUGCCGACAU- 5'	no
lcr-miR-N370	rna-XM_019267591.2	gene-LOC104932996	LOC104932996	protein FAM19A5	516	537	161	-27.03	miRNA: 3' agacuuauaGUCGUGCCGACAu 5' |:***:*:*|||:||||||||* target: 5' ttgttgggaCAGTACGGCTGTt 3'	518	539	-28.4	0.009937	target: 5' A--CAGUACGGCUGUU 3' ***|||:||||||||* miRNA: 3' AUAGUCGUGCCGACAU 5'	no
lcr-miR-N370	rna-XM_019266205.2	gene-steap2	steap2	STEAP2 metalloreductase, transcript variant X1	810	832	161	-27.16	miRNA: 3' agACUUAUAGUCGU--GCCGACAu 5' |||||:*|*|||||**|||||||* target: 5' tcTGAGGA-CAGCATGCGGCTGTc 3'	809	830	-31.1	0.005602	target: 5' GGA-CAGCAUGCGGCUGUC 3' :*|*||||**:|||||||* miRNA: 3' UAUAGUCG--UGCCGACAU 5'	no
lcr-miR-N370	rna-XM_027277134.1	gene-LOC104921635	LOC104921635	glycerol-3-phosphate acyltransferase 2, mitochondrial, transcript variant X1	679	701	167	-25.9	miRNA: 3' agACUUAU-AGUCGUGCCGACAu 5' **|*||||*||||||:||||||* target: 5' agTCAATACTCAGCATGGCTGTt 3'	668	689	-29.7	0.009723	target: 5' UGUACAGUCAAUACUCAGCAUGGCUGUU 3' *********||||*||||||:||||||* miRNA: 3' ---------UUAU-AGUCGUGCCGACAU 5'	no
lcr-miR-N370	rna-XM_019274769.2	gene-LOC104930463	LOC104930463	centrosomal protein of 164 kDa	225	247	169	-23.17	miRNA: 3' agacUUAUAGUC-GUGCCGACAu 5' *:**|||||*||*:||||||||: target: 5' ctccAATATGAGATACGGCTGTg 3'	228	249	-26.5	0.005516	target: 5' UAUGAGAUACGGCUGUGA 3' |||*||*:||||||||:* miRNA: 3' AUAGUC-GUGCCGACAU- 5'	no
lcr-miR-N370	rna-XM_019272894.2	gene-LOC104934420	LOC104934420	fatty aldehyde dehydrogenase	77	98	178	-29.79	miRNA: 3' agacUUAUAGUCGUGCCGACAu 5' ****|:||||||*||||||||| target: 5' aaaaAGTATCAGGACGGCTGTa 3'	80	101	-32.2	0.000741	target: 5' UAUCAGGACGGCUGUAA 3' ||||||*|||||||||* miRNA: 3' AUAGUCGUGCCGACAU- 5'	no
lcr-miR-N370	rna-XM_019266206.2	gene-steap2	steap2	STEAP2 metalloreductase, transcript variant X1	810	832	161	-27.16	miRNA: 3' agACUUAUAGUCGU--GCCGACAu 5' |||||:*|*|||||**|||||||* target: 5' tcTGAGGA-CAGCATGCGGCTGTc 3'	809	830	-31.1	0.005602	target: 5' GGA-CAGCAUGCGGCUGUC 3' :*|*||||**:|||||||* miRNA: 3' UAUAGUCG--UGCCGACAU 5'	no
lcr-miR-N370	rna-XM_010754025.3	gene-srebf2	srebf2	sterol regulatory element binding transcription factor 2	515	536	160	-28.45	miRNA: 3' agacuuauagUCGUGCCGACAu 5' **********|||||||||||: target: 5' cggtctgtgaAGCACGGCTGTg 3'	517	538	-31.4	0.009641	target: 5' GA---AGCACGGCUGUGC 3' :****|||||||||||:* miRNA: 3' UAUAGUCGUGCCGACAU- 5'	no
lcr-miR-N370	rna-XM_019277253.2	gene-tbc1d16	tbc1d16	TBC1 domain family member 16, transcript variant X1	2015	2036	176	-27.83	miRNA: 3' agACUUAUAGUCGUGCCGACAu 5' |:||||*||:||*:|||||||: target: 5' ttTGAAGATTAGGGCGGCTGTg 3'	2012	2033	-31.9	0.009991	target: 5' AGAUUAGGGCGGCUGUGU 3' |*||:||*:|||||||:* miRNA: 3' UAUAGUCGUGCCGACAU- 5'	no
lcr-miR-N370	rna-XM_010755071.3	gene-LOC104938651	LOC104938651	putative Dol-P-Glc:Glc(2)Man(9)GlcNAc(2)-PP-Dol alpha-1,2-glucosyltransferase	212	233	165	-28.74	miRNA: 3' agacuuauaGUCGUGCCGACAu 5' *********||||||||||||| target: 5' aaaactctgCAGCACGGCTGTa 3'	216	237	-32.2	0.002118	target: 5' ----CAGCACGGCUGUAA 3' ****|||||||||||||* miRNA: 3' UAUAGUCGUGCCGACAU- 5'	no
lcr-miR-N370	rna-XM_010742530.3	gene-wwc3	wwc3	WWC family member 3	219	240	168	-25.84	miRNA: 3' agACUUAUAGUCGUGCCGACAu 5' |*|*:|*|*||||:|||||||* target: 5' taTCGACAACAGCGCGGCTGTt 3'	227	248	-28.9	0.006567	target: 5' --ACAGCGCGGCUGUU 3' ***||||:|||||||* miRNA: 3' AUAGUCGUGCCGACAU 5'	no
lcr-miR-N370	rna-XM_027285939.1	gene-LOC104930225	LOC104930225	DDB1- and CUL4-associated factor 7	317	337	164	-26.54	miRNA: 3' agacUUAUAGUCGUGCCGACAu 5' *|**:||*|||||*|||||||: target: 5' gcgtGATTTCAGC-CGGCTGTg 3'	319	340	-30.2	0.007088	target: 5' U-UCAGC-CGGCUGUGA 3' |*|||||*|||||||:* miRNA: 3' AUAGUCGUGCCGACAU- 5'	no
lcr-miR-N370	rna-XM_027277147.1	gene-LOC104921635	LOC104921635	glycerol-3-phosphate acyltransferase 2, mitochondrial, transcript variant X1	679	701	167	-25.9	miRNA: 3' agACUUAU-AGUCGUGCCGACAu 5' **|*||||*||||||:||||||* target: 5' agTCAATACTCAGCATGGCTGTt 3'	668	689	-29.7	0.009723	target: 5' UGUACAGUCAAUACUCAGCAUGGCUGUU 3' *********||||*||||||:||||||* miRNA: 3' ---------UUAU-AGUCGUGCCGACAU 5'	no
lcr-miR-N370	rna-XM_027288382.1	gene-dennd2d	dennd2d	DENN domain containing 2D, transcript variant X1	104	125	172	-25.74	miRNA: 3' agACUUAUAGUCGUGCCGACAu 5' |*|||||**|*|:||||||||| target: 5' tgTGAATTACTGTACGGCTGTa 3'	105	126	-29	0.001057	target: 5' UUACUGUACGGCUGUAU 3' |**|*|:|||||||||* miRNA: 3' AUAGUCGUGCCGACAU- 5'	no
lcr-miR-N370	rna-XM_019266207.2	gene-steap2	steap2	STEAP2 metalloreductase, transcript variant X1	810	832	161	-27.16	miRNA: 3' agACUUAUAGUCGU--GCCGACAu 5' |||||:*|*|||||**|||||||* target: 5' tcTGAGGA-CAGCATGCGGCTGTc 3'	809	830	-31.1	0.005602	target: 5' GGA-CAGCAUGCGGCUGUC 3' :*|*||||**:|||||||* miRNA: 3' UAUAGUCG--UGCCGACAU 5'	no
lcr-miR-N370	rna-XM_027291708.1	gene-LOC104925737	LOC104925737	gamma-aminobutyric acid receptor subunit alpha-5-like, transcript variant X1	2782	2806	167	-32.45	miRNA: 3' agACUUAUAG---UCGUGCCGACAu 5' *|||:*|:||***|||||||||||| target: 5' acTGGCTGTCACTAGCACGGCTGTa 3'	2780	2801	-34.3	0.005691	target: 5' UGUCACUAGCACGGCUGUAC 3' |:||***||||||||||||* miRNA: 3' AUAG---UCGUGCCGACAU- 5'	no
lcr-miR-N370	rna-XM_019264519.2	gene-LOC104921635	LOC104921635	glycerol-3-phosphate acyltransferase 2, mitochondrial, transcript variant X1	679	701	167	-25.9	miRNA: 3' agACUUAU-AGUCGUGCCGACAu 5' **|*||||*||||||:||||||* target: 5' agTCAATACTCAGCATGGCTGTt 3'	668	689	-29.7	0.009723	target: 5' UGUACAGUCAAUACUCAGCAUGGCUGUU 3' *********||||*||||||:||||||* miRNA: 3' ---------UUAU-AGUCGUGCCGACAU 5'	no
lcr-miR-N370	rna-XM_010736010.3	gene-esrp1	esrp1	epithelial splicing regulatory protein 1, transcript variant X1	338	360	167	-30.41	miRNA: 3' agACUUAUAGU-CGUGCCGACAu 5' **|||:|||:|*|||:||||||: target: 5' aaTGAGTATTATGCATGGCTGTg 3'	339	360	-33.6	0.001452	target: 5' UAUUAUGCAUGGCUGUGU 3' |||:|*|||:||||||:* miRNA: 3' AUAGU-CGUGCCGACAU- 5'	no
lcr-miR-N370	rna-XM_019264517.2	gene-LOC104921635	LOC104921635	glycerol-3-phosphate acyltransferase 2, mitochondrial, transcript variant X1	679	701	167	-25.9	miRNA: 3' agACUUAU-AGUCGUGCCGACAu 5' **|*||||*||||||:||||||* target: 5' agTCAATACTCAGCATGGCTGTt 3'	668	689	-29.7	0.009723	target: 5' UGUACAGUCAAUACUCAGCAUGGCUGUU 3' *********||||*||||||:||||||* miRNA: 3' ---------UUAU-AGUCGUGCCGACAU 5'	no
lcr-miR-N370	rna-XM_027288380.1	gene-dennd2d	dennd2d	DENN domain containing 2D, transcript variant X1	104	125	172	-25.74	miRNA: 3' agACUUAUAGUCGUGCCGACAu 5' |*|||||**|*|:||||||||| target: 5' tgTGAATTACTGTACGGCTGTa 3'	105	126	-29	0.001057	target: 5' UUACUGUACGGCUGUAU 3' |**|*|:|||||||||* miRNA: 3' AUAGUCGUGCCGACAU- 5'	no
lcr-miR-N434	rna-XM_019276476.2	gene-LOC104919726	LOC104919726	unconventional myosin-Ic, transcript variant X1	374	393	166	-27.98	miRNA: 3' gcucuuGGUCGUCUGACUCu 5' **|*:*||||:||||||||: target: 5' gaaagtCCAGTAGACTGAGg 3'	371	390	-34.1	0.000201	target: 5' AGUCCAGUAGACUGAGGG 3' ***||||:||||||||:* miRNA: 3' ---GGUCGUCUGACUCU- 5'	no
lcr-miR-N434	rna-XM_027275328.1	gene-LOC104937278	LOC104937278	pogo transposable element with ZNF domain, transcript variant X4	61	82	168	-27.19	miRNA: 3' gcUC-UUGGUCG-UCUGACUCu 5' **||*|||||||*:|||||||* target: 5' gcAGAAACCAGCTGGACTGAGt 3'	50	69	-29.4	0.001648	target: 5' AUUUUGCAGAAACCAGCUGGACUGAGU 3' ***********||||||*:|||||||* miRNA: 3' -----------UGGUCG-UCUGACUCU 5'	no
lcr-miR-N434	rna-XM_019267473.2	gene-fgl2	fgl2	fibrinogen like 2, transcript variant X2	68	87	178	-27.7	miRNA: 3' gcUCUUGGUCGUCUGACUCu 5' |*|||||*||:||||||||| target: 5' caAGAACAAGTAGACTGAGa 3'	69	88	-31.1	0.007521	target: 5' CAAGUAGACUGAGAA 3' |*||:|||||||||* miRNA: 3' GGUCGUCUGACUCU- 5'	no
lcr-miR-N434	rna-XM_027280770.1	gene-LOC104930079	LOC104930079	latent-transforming growth factor beta-binding protein 4	12	32	160	-24.8	miRNA: 3' gcuCUUGGUC-GUCUGACUCu 5' ***|:|||:|*::|||||||| target: 5' accGGACCGGATGGACTGAGa 3'	14	33	-30.3	0.001895	target: 5' CCGGAUGGACUGAGAA 3' ||:|*::||||||||* miRNA: 3' GGUC-GUCUGACUCU- 5'	no
lcr-miR-N434	rna-XM_019260405.2	gene-LOC104918704	LOC104918704	myocardin-related transcription factor B, transcript variant X3	240	259	170	-26.48	miRNA: 3' gcUCUUGGUCGUCUGACUCu 5' |*:|*||::||||||||||* target: 5' ctGGTACTGGCAGACTGAGc 3'	241	260	-28.9	0.004086	target: 5' CUGGCAGACUGAGC 3' |::||||||||||* miRNA: 3' GGUCGUCUGACUCU 5'	no
lcr-miR-N434	rna-XM_027275332.1	gene-LOC104937278	LOC104937278	pogo transposable element with ZNF domain, transcript variant X4	61	82	168	-27.19	miRNA: 3' gcUC-UUGGUCG-UCUGACUCu 5' **||*|||||||*:|||||||* target: 5' gcAGAAACCAGCTGGACTGAGt 3'	1690	1709	-31.3	0.009352	target: 5' AGCCGGGAGGCUGGGU 3' |:||:|*||:|||:|* miRNA: 3' UUGGUCGUCUGACUCU 5'	no
lcr-miR-N434	rna-XM_010744347.3	gene-LOC104929753	LOC104929753	cysteine and glycine-rich protein 2	355	376	165	-26.07	miRNA: 3' gcUCUUGGUCG--UCUGACUCu 5' **|||||:||:**:|||||||| target: 5' gaAGAACTAGTGAGGACTGAGa 3'	356	375	-31.3	0.002735	target: 5' CUAGUGAGGACUGAGAU 3' |:||:**:||||||||* miRNA: 3' GGUCG--UCUGACUCU- 5'	no
lcr-miR-N434	rna-XM_027284095.1	gene-reps1	reps1	RALBP1 associated Eps domain containing 1, transcript variant X2	304	325	161	-31.44	miRNA: 3' gcUCUUG--GUCGUCUGACUCu 5' :|||:|:**|:||:|||||||| target: 5' tgAGGATGACGGCGGACTGAGa 3'	304	323	-34.5	0.003795	target: 5' UGACGGCGGACUGAGAA 3' :**|:||:||||||||* miRNA: 3' G--GUCGUCUGACUCU- 5'	no
lcr-miR-N434	rna-XM_027289822.1	gene-pms2	pms2	PMS1 homolog 2, mismatch repair system component, transcript variant X2	100	120	168	-23.15	miRNA: 3' gcuCUUG-GUCGUCUGACUCu 5' ***||||*|||*||||||||* target: 5' actGAACACAGAAGACTGAGt 3'	102	121	-25.4	0.008012	target: 5' CACAGAAGACUGAGU 3' |*|||*||||||||* miRNA: 3' G-GUCGUCUGACUCU 5'	no
lcr-miR-N434	rna-XM_010755885.3	gene-polr2d	polr2d	RNA polymerase II subunit D	33	50	163	-25.56	miRNA: 3' gcUCUUGGUCGUCUGACUCu 5' |*||:|||||**|||||||| target: 5' ccAGGACCAG--GACTGAGa 3'	46	65	-30	2.4e-05	target: 5' CCAGUACUGAGACUGAGAC 3' ||||:****|||||||||* miRNA: 3' GGUCG----UCUGACUCU- 5'	no
lcr-miR-N434	rna-XM_027279227.1	gene-srgap3	srgap3	SLIT-ROBO Rho GTPase activating protein 3, transcript variant X3	3089	3108	165	-30.16	miRNA: 3' gcuCUUGGUCGUCUGACUCu 5' *|*||:**|||||||||||| target: 5' ggtGAGAGAGCAGACTGAGa 3'	3088	3107	-32.6	0.009151	target: 5' --AGCAGACUGAGAG 3' **||||||||||||* miRNA: 3' GGUCGUCUGACUCU- 5'	no
lcr-miR-N434	rna-XM_027280330.1	gene-LOC104934173	LOC104934173	aminopeptidase RNPEPL1	508	527	174	-29.39	miRNA: 3' gcUCUUGGUCGUCUGACUCu 5' **|||::||||*|||||||| target: 5' gcAGAGTCAGCTGACTGAGa 3'	506	525	-30.6	0.004278	target: 5' AGUCAGCUGACUGAGAC 3' |::||||*||||||||* miRNA: 3' UUGGUCGUCUGACUCU- 5'	no
lcr-miR-N434	rna-XM_027275331.1	gene-LOC104937278	LOC104937278	pogo transposable element with ZNF domain, transcript variant X4	61	82	168	-27.19	miRNA: 3' gcUC-UUGGUCG-UCUGACUCu 5' **||*|||||||*:|||||||* target: 5' gcAGAAACCAGCTGGACTGAGt 3'	50	69	-29.4	0.001648	target: 5' AUUUUGCAGAAACCAGCUGGACUGAGU 3' ***********||||||*:|||||||* miRNA: 3' -----------UGGUCG-UCUGACUCU 5'	no
lcr-miR-N434	rna-XM_019276031.2	gene-LOC109142390	LOC109142390	beta-crystallin A1	3	24	161	-27.37	miRNA: 3' gcUCUUGGUCG--UCUGACUCu 5' *|||:||*:||**||||||||| target: 5' ggAGGACAGGCTGAGACTGAGa 3'	3	22	-31.2	0.001105	target: 5' CAGGCUGAGACUGAGAU 3' |*:||**|||||||||* miRNA: 3' GGUCG--UCUGACUCU- 5'	no
lcr-miR-N434	rna-XM_010745413.3	gene-tbx2	tbx2	T-box 2, transcript variant X1	499	517	160	-23.45	miRNA: 3' gcUCUUGGUCGUCUGACUCu 5' **||**||*||||||||||* target: 5' gtAGCTCC-GCAGACTGAGc 3'	489	508	-32.2	0.001028	target: 5' GCCUGUAGCUCCGCAGACUGAGC 3' :||*********||||||||||* miRNA: 3' UGGU--------CGUCUGACUCU 5'	no
lcr-miR-N434	rna-XM_019262301.2	gene-LOC104929675	LOC104929675	voltage-dependent calcium channel beta subunit-associated regulatory protein, transcript variant X1	915	933	167	-27.87	miRNA: 3' gcuCUUGGUCGUCUGACUCu 5' ***|||||||:*|||||||| target: 5' gatGAACCAGT-GACTGAGa 3'	914	933	-32.2	0.008743	target: 5' ACCAGU-GACUGAGAG 3' |||||:*||||||||* miRNA: 3' UGGUCGUCUGACUCU- 5'	no
lcr-miR-N434	rna-XM_010749778.3	gene-tsen34	tsen34	tRNA splicing endonuclease subunit 34	111	129	167	-25.3	miRNA: 3' gcuCUUGGUCGUCUGACUCu 5' :**|:||||*|||||||||* target: 5' tttGGACCA-CAGACTGAGc 3'	113	132	-28	0.005284	target: 5' CCA-CAGACUGAGC 3' |||*|||||||||* miRNA: 3' GGUCGUCUGACUCU 5'	no
lcr-miR-N434	rna-XM_010741413.3	gene-fopnl	fopnl	FGFR1OP N-terminal like	18	39	160	-23.37	miRNA: 3' gcuCUUGGUCGU--CUGACUCu 5' |**|:|*|||||**|||||||| target: 5' cctGGAGCAGCATGGACTGAGa 3'	20	39	-28.4	0.001427	target: 5' GCAGCAUGGACUGAGAA 3' *||||**:||||||||* miRNA: 3' GGUCG--UCUGACUCU- 5'	no
lcr-miR-N434	rna-XM_010729782.3	gene-LOC104918135	LOC104918135	transmembrane protein 116, transcript variant X2	646	665	162	-26.79	miRNA: 3' gcUCUUGGUCGUCUGACUCu 5' :|||*|*:*||||||||||: target: 5' tgAGTAATTGCAGACTGAGg 3'	646	665	-28.4	0.009216	target: 5' AUU-GCAGACUGAGGA 3' |::*||||||||||:* miRNA: 3' UGGUCGUCUGACUCU- 5'	no
lcr-miR-N434	rna-XM_019276475.2	gene-LOC104919726	LOC104919726	unconventional myosin-Ic, transcript variant X1	374	393	166	-27.98	miRNA: 3' gcucuuGGUCGUCUGACUCu 5' **|*:*||||:||||||||: target: 5' gaaagtCCAGTAGACTGAGg 3'	371	390	-34.1	0.000201	target: 5' AGUCCAGUAGACUGAGGG 3' ***||||:||||||||:* miRNA: 3' ---GGUCGUCUGACUCU- 5'	no
lcr-miR-N434	rna-XM_019255667.2	gene-LOC104927199	LOC104927199	disintegrin and metalloproteinase domain-containing protein 19	289	308	166	-28.67	miRNA: 3' gcUCUUGGUCGUCUGACUCu 5' *|||:*|:*||||||||||| target: 5' ggAGGCCTTGCAGACTGAGa 3'	289	308	-32.3	0.001346	target: 5' CCUUGCAGACUGAGAC 3' ||**|||||||||||* miRNA: 3' GGU-CGUCUGACUCU- 5'	no
lcr-miR-N434	rna-XM_027283456.1	gene-LOC104933874	LOC104933874	protocadherin-10, transcript variant X1	616	636	161	-28.33	miRNA: 3' gcUCUUGGUCG-UCUGACUCu 5' *||||:**|||*||||||||| target: 5' agAGAGAAAGCGAGACTGAGa 3'	616	635	-31.5	0.005632	target: 5' AAAGCGAGACUGAGAG 3' **|||*|||||||||* miRNA: 3' GGUCG-UCUGACUCU- 5'	no
lcr-miR-N434	rna-XM_010744322.3	gene-LOC109136851	LOC109136851	RNA binding protein fox-1 homolog 1-like, transcript variant X2	522	541	160	-21.71	miRNA: 3' gcucUUGGUCGUCUGACUCu 5' *|**|*||||:*|||||||| target: 5' ggttACCCAGTCGACTGAGa 3'	519	538	-30.4	0.002146	target: 5' UACCCAGUCGACUGAGAG 3' ***||||:*||||||||* miRNA: 3' ---GGUCGUCUGACUCU- 5'	no
lcr-miR-N434	rna-XM_027286807.1	gene-otoa	otoa	otoancorin	712	731	160	-31.28	miRNA: 3' gcucUUGGUCGUCUGACUCu 5' *|**:||||||||:|||||| target: 5' agcaGACCAGCAGGCTGAGa 3'	715	734	-34.6	0.000338	target: 5' CCAGCAGGCUGAGAC 3' |||||||:||||||* miRNA: 3' GGUCGUCUGACUCU- 5'	no
lcr-miR-N434	rna-XM_027283116.1	gene-endov	endov	endonuclease V, transcript variant X2	1	18	161	-26.77	miRNA: 3' gcucuugGUCGUCUGACUCu 5' *****:*||||:|||||||: target: 5' --ctcgaCAGCGGACTGAGg 3'	5	24	-28.3	0.000117	target: 5' ACAGCGGACUGAGGU 3' *||||:|||||||:* miRNA: 3' GGUCGUCUGACUCU- 5'	no
lcr-miR-N434	rna-XM_010746167.3	gene-LOC104931219	LOC104931219	cdc42 effector protein 3	350	369	162	-26.59	miRNA: 3' gcUCUUGGUCGUCUGACUCu 5' :|||*::|*|:||||||||| target: 5' tgAGTGTCTGTAGACTGAGa 3'	350	369	-30	0.004909	target: 5' UCUGUAGACUGAGAA 3' :|*|:|||||||||* miRNA: 3' GGUCGUCUGACUCU- 5'	no
lcr-miR-N434	rna-XM_027291227.1	gene-twsg1	twsg1	twisted gastrulation BMP signaling modulator 1, transcript variant X1	34	53	167	-25.73	miRNA: 3' gcucuUGGUCGUCUGACUCu 5' :****|||||::|||||||: target: 5' ttcatACCAGTGGACTGAGg 3'	38	57	-29.9	0.000803	target: 5' CCAGUGGACUGAGGG 3' ||||::|||||||:* miRNA: 3' GGUCGUCUGACUCU- 5'	no
lcr-miR-N434	rna-XM_010736484.3	gene-LOC104923414	LOC104923414	regulator of G-protein signaling 9	180	199	161	-23.37	miRNA: 3' gcucuugGUCGUCUGACUCu 5' :||****|||:||||||||* target: 5' tgatctaCAGTAGACTGAGc 3'	167	186	-27.9	0.005945	target: 5' UGGCUGUUGAUCUACAGUAGACUGAGC 3' :*************|||:||||||||* miRNA: 3' G-------------GUCGUCUGACUCU 5'	no
lcr-miR-N434	rna-XM_027287150.1	gene-LOC104940319	LOC104940319	metalloreductase STEAP4	561	580	160	-25.02	miRNA: 3' gcucuuggUCGUCUGACUCu 5' |*:**|**|||||||||||: target: 5' cagccagaAGCAGACTGAGg 3'	558	577	-30	0.00955	target: 5' CCAGAAGCAGACUGAGGA 3' ||***|||||||||||:* miRNA: 3' GG---UCGUCUGACUCU- 5'	no
lcr-miR-N434	rna-XM_027286841.1	gene-LOC109136851	LOC109136851	RNA binding protein fox-1 homolog 1-like, transcript variant X2	522	541	160	-21.71	miRNA: 3' gcucUUGGUCGUCUGACUCu 5' *|**|*||||:*|||||||| target: 5' ggttACCCAGTCGACTGAGa 3'	519	538	-30.4	0.002146	target: 5' UACCCAGUCGACUGAGAG 3' ***||||:*||||||||* miRNA: 3' ---GGUCGUCUGACUCU- 5'	no
lcr-miR-N434	rna-XM_027283455.1	gene-LOC104933874	LOC104933874	protocadherin-10, transcript variant X1	650	670	161	-28.33	miRNA: 3' gcUCUUGGUCG-UCUGACUCu 5' *||||:**|||*||||||||| target: 5' agAGAGAAAGCGAGACTGAGa 3'	650	669	-31.5	0.005806	target: 5' AAAGCGAGACUGAGAG 3' **|||*|||||||||* miRNA: 3' GGUCG-UCUGACUCU- 5'	no
lcr-miR-N434	rna-XM_019272495.2	gene-gosr1	gosr1	golgi SNAP receptor complex member 1	60	81	165	-28.04	miRNA: 3' gcUCUUG--GUCGUCUGACUCu 5' :|:||||**|||*||||||||* target: 5' tgGGAACCACAGGAGACTGAGc 3'	60	79	-30.3	0.001339	target: 5' CCACAGGAGACUGAGC 3' ||**||*||||||||* miRNA: 3' GG--UCGUCUGACUCU 5'	no
lcr-miR-N434	rna-XM_019276477.2	gene-LOC104919726	LOC104919726	unconventional myosin-Ic, transcript variant X1	374	393	166	-27.98	miRNA: 3' gcucuuGGUCGUCUGACUCu 5' **|*:*||||:||||||||: target: 5' gaaagtCCAGTAGACTGAGg 3'	371	390	-34.1	0.000201	target: 5' AGUCCAGUAGACUGAGGG 3' ***||||:||||||||:* miRNA: 3' ---GGUCGUCUGACUCU- 5'	no
lcr-miR-N434	rna-XM_010750890.3	gene-alg3	alg3	ALG3, alpha-1,3- mannosyltransferase	672	691	161	-24.18	miRNA: 3' gcucuugGUCGUCUGACUCu 5' **|*:**|||:||||||||: target: 5' aaatgtgCAGTAGACTGAGg 3'	675	694	-28.5	0.007794	target: 5' GCAGUAGACUGAGGC 3' *|||:||||||||:* miRNA: 3' GGUCGUCUGACUCU- 5'	no
lcr-miR-N434	rna-XM_019254948.2	gene-epg5	epg5	ectopic P-granules autophagy protein 5 homolog	1587	1609	165	-32.14	miRNA: 3' gcUCUUGGUCGU---CUGACUCu 5' *|:||:||||||***|||||||: target: 5' agGGAGCCAGCATATGACTGAGg 3'	1586	1605	-36.4	0.000579	target: 5' CCAGCAUAUGACUGAGGG 3' ||||||***|||||||:* miRNA: 3' GGUCGU---CUGACUCU- 5'	no
lcr-miR-N434	rna-XM_010743716.3	gene-LOC104929249	LOC104929249	thyrotropin-releasing hormone receptor	771	793	161	-27.1	miRNA: 3' gcUCUUGG---UCGUCUGACUCu 5' **:||:||***:||||||||||* target: 5' gtGGAGCCTGAGGCAGACTGAGc 3'	772	791	-31.5	0.008617	target: 5' CCUGAGGCAGACUGAGC 3' ||***:||||||||||* miRNA: 3' GG---UCGUCUGACUCU 5'	no
lcr-miR-N434	rna-XM_010730535.3	gene-LOC104918704	LOC104918704	myocardin-related transcription factor B, transcript variant X3	240	259	170	-26.48	miRNA: 3' gcUCUUGGUCGUCUGACUCu 5' |*:|*||::||||||||||* target: 5' ctGGTACTGGCAGACTGAGc 3'	241	260	-28.9	0.004086	target: 5' CUGGCAGACUGAGC 3' |::||||||||||* miRNA: 3' GGUCGUCUGACUCU 5'	no
lcr-miR-N434	rna-XM_019260011.2	gene-LOC104918135	LOC104918135	transmembrane protein 116, transcript variant X2	646	665	162	-26.79	miRNA: 3' gcUCUUGGUCGUCUGACUCu 5' :|||*|*:*||||||||||: target: 5' tgAGTAATTGCAGACTGAGg 3'	646	665	-28.4	0.009216	target: 5' AUU-GCAGACUGAGGA 3' |::*||||||||||:* miRNA: 3' UGGUCGUCUGACUCU- 5'	no
lcr-miR-N434	rna-XM_019260399.2	gene-LOC104918704	LOC104918704	myocardin-related transcription factor B, transcript variant X3	240	259	170	-26.48	miRNA: 3' gcUCUUGGUCGUCUGACUCu 5' |*:|*||::||||||||||* target: 5' ctGGTACTGGCAGACTGAGc 3'	241	260	-28.9	0.004086	target: 5' CUGGCAGACUGAGC 3' |::||||||||||* miRNA: 3' GGUCGUCUGACUCU 5'	no
lcr-miR-N434	rna-XM_019268089.2	gene-LOC104937961	LOC104937961	RNA-binding protein Musashi homolog 1, transcript variant X1	89	107	168	-28.62	miRNA: 3' gcUCUUGGUCGUCUGACUCu 5' **|||:|:*||||||||||| target: 5' gcAGAGCT-GCAGACTGAGa 3'	90	109	-31.8	0.006849	target: 5' CU-GCAGACUGAGAG 3' |:*|||||||||||* miRNA: 3' GGUCGUCUGACUCU- 5'	no
lcr-miR-N434	rna-XM_027289823.1	gene-pms2	pms2	PMS1 homolog 2, mismatch repair system component, transcript variant X2	100	120	168	-23.15	miRNA: 3' gcuCUUG-GUCGUCUGACUCu 5' ***||||*|||*||||||||* target: 5' actGAACACAGAAGACTGAGt 3'	102	121	-25.4	0.008012	target: 5' CACAGAAGACUGAGU 3' |*|||*||||||||* miRNA: 3' G-GUCGUCUGACUCU 5'	no
lcr-miR-N434	rna-XM_010740166.3	gene-LOC104926332	LOC104926332	leucine-rich repeat transmembrane protein FLRT1, transcript variant X1	1347	1370	160	-29.72	miRNA: 3' gcUCUUGG---UCG-UCUGACUCu 5' |||||||:***|||*||||||||: target: 5' cgAGAACTGTGAGCGAGACTGAGg 3'	1345	1364	-33	0.004375	target: 5' ACUGUGAGCGAGACUGAGGA 3' ||:***|||*||||||||:* miRNA: 3' UGG---UCG-UCUGACUCU- 5'	no
lcr-miR-N434	rna-XM_027275333.1	gene-LOC104937278	LOC104937278	pogo transposable element with ZNF domain, transcript variant X4	61	82	168	-27.19	miRNA: 3' gcUC-UUGGUCG-UCUGACUCu 5' **||*|||||||*:|||||||* target: 5' gcAGAAACCAGCTGGACTGAGt 3'	50	69	-29.4	0.001648	target: 5' AUUUUGCAGAAACCAGCUGGACUGAGU 3' ***********||||||*:|||||||* miRNA: 3' -----------UGGUCG-UCUGACUCU 5'	no
lcr-miR-N434	rna-XM_019265501.2	gene-LOC104938333	LOC104938333	glucocorticoid receptor	242	261	168	-26.13	miRNA: 3' gcucUUGGUCGUCUGACUCu 5' :***:||*|||||||||||| target: 5' ttttGACGAGCAGACTGAGa 3'	237	256	-33.1	0.008712	target: 5' UUUGACGAGCAGACUGAGAU 3' ****||*||||||||||||* miRNA: 3' ----UGGUCGUCUGACUCU- 5'	no
lcr-miR-N434	rna-XM_019278692.2	gene-LOC109143006	LOC109143006	homeobox protein pnx	50	69	166	-22.87	miRNA: 3' gcUCUUGGUCGUCUGACUCu 5' **||*::|*||||||||||* target: 5' gaAGCGTCTGCAGACTGAGt 3'	46	65	-29	0.000172	target: 5' AGCGUCUGCAGACUGAGU 3' ****:|*||||||||||* miRNA: 3' ----GGUCGUCUGACUCU 5'	no
lcr-miR-N434	rna-XM_019268081.2	gene-LOC104937961	LOC104937961	RNA-binding protein Musashi homolog 1, transcript variant X1	89	107	168	-28.62	miRNA: 3' gcUCUUGGUCGUCUGACUCu 5' **|||:|:*||||||||||| target: 5' gcAGAGCT-GCAGACTGAGa 3'	90	109	-31.8	0.006844	target: 5' CU-GCAGACUGAGAG 3' |:*|||||||||||* miRNA: 3' GGUCGUCUGACUCU- 5'	no
lcr-miR-N434	rna-XM_027291233.1	gene-twsg1	twsg1	twisted gastrulation BMP signaling modulator 1, transcript variant X1	34	53	167	-25.73	miRNA: 3' gcucuUGGUCGUCUGACUCu 5' :****|||||::|||||||: target: 5' ttcatACCAGTGGACTGAGg 3'	38	57	-29.9	0.000803	target: 5' CCAGUGGACUGAGGG 3' ||||::|||||||:* miRNA: 3' GGUCGUCUGACUCU- 5'	no
lcr-miR-N434	rna-XM_019269500.2	gene-tbx2	tbx2	T-box 2, transcript variant X1	499	517	160	-23.45	miRNA: 3' gcUCUUGGUCGUCUGACUCu 5' **||**||*||||||||||* target: 5' gtAGCTCC-GCAGACTGAGc 3'	489	508	-32.2	0.001028	target: 5' GCCUGUAGCUCCGCAGACUGAGC 3' :||*********||||||||||* miRNA: 3' UGGU--------CGUCUGACUCU 5'	no
lcr-miR-N434	rna-XM_027275330.1	gene-LOC104937278	LOC104937278	pogo transposable element with ZNF domain, transcript variant X4	61	82	168	-27.19	miRNA: 3' gcUC-UUGGUCG-UCUGACUCu 5' **||*|||||||*:|||||||* target: 5' gcAGAAACCAGCTGGACTGAGt 3'	50	69	-29.4	0.001648	target: 5' AUUUUGCAGAAACCAGCUGGACUGAGU 3' ***********||||||*:|||||||* miRNA: 3' -----------UGGUCG-UCUGACUCU 5'	no
lcr-miR-N434	rna-XM_019267752.2	gene-tyw5	tyw5	tRNA-yW synthesizing protein 5	845	865	165	-27.74	miRNA: 3' gcUCUUGG-UCGUCUGACUCu 5' *|||||||*||**|||||||| target: 5' agAGAACCTAGACGACTGAGa 3'	845	864	-30.3	0.005859	target: 5' CCUAGAC-GACUGAGAA 3' ||*||*|*||||||||* miRNA: 3' GG-UC-GUCUGACUCU- 5'	no
lcr-miR-N434	rna-XM_019262302.2	gene-LOC104929675	LOC104929675	voltage-dependent calcium channel beta subunit-associated regulatory protein, transcript variant X1	915	933	167	-27.87	miRNA: 3' gcuCUUGGUCGUCUGACUCu 5' ***|||||||:*|||||||| target: 5' gatGAACCAGT-GACTGAGa 3'	914	933	-32.2	0.008743	target: 5' ACCAGU-GACUGAGAG 3' |||||:*||||||||* miRNA: 3' UGGUCGUCUGACUCU- 5'	no
lcr-miR-N434	rna-XM_019274748.2	gene-reps1	reps1	RALBP1 associated Eps domain containing 1, transcript variant X2	304	325	161	-31.44	miRNA: 3' gcUCUUG--GUCGUCUGACUCu 5' :|||:|:**|:||:|||||||| target: 5' tgAGGATGACGGCGGACTGAGa 3'	304	323	-34.5	0.003795	target: 5' UGACGGCGGACUGAGAA 3' :**|:||:||||||||* miRNA: 3' G--GUCGUCUGACUCU- 5'	no
lcr-miR-N434	rna-XM_027284233.1	gene-LOC104931443	LOC104931443	phospholipase B1, membrane-associated-like	336	354	163	-26.24	miRNA: 3' gcuCUUGGUCGUCUGACUCu 5' ***||:|:*||||||||||| target: 5' aatGAGCT-GCAGACTGAGa 3'	338	357	-30.3	0.000997	target: 5' CU-GCAGACUGAGAU 3' |:*|||||||||||* miRNA: 3' GGUCGUCUGACUCU- 5'	no
lcr-miR-N434	rna-XM_010751343.3	gene-ascc2	ascc2	activating signal cointegrator 1 complex subunit 2, transcript variant X2	404	422	167	-30.53	miRNA: 3' gcuCUUGGUCGUCUGACUCu 5' ||*||:||||*||||||||: target: 5' cgtGAGCCAG-AGACTGAGg 3'	403	422	-32.6	0.001636	target: 5' GCCAG-AGACUGAGGA 3' :||||*||||||||:* miRNA: 3' UGGUCGUCUGACUCU- 5'	no
lcr-miR-N434	rna-XM_019259568.2	gene-LOC104926332	LOC104926332	leucine-rich repeat transmembrane protein FLRT1, transcript variant X1	1347	1370	160	-29.72	miRNA: 3' gcUCUUGG---UCG-UCUGACUCu 5' |||||||:***|||*||||||||: target: 5' cgAGAACTGTGAGCGAGACTGAGg 3'	1345	1364	-33	0.004375	target: 5' ACUGUGAGCGAGACUGAGGA 3' ||:***|||*||||||||:* miRNA: 3' UGG---UCG-UCUGACUCU- 5'	no
lcr-miR-N434	rna-XM_027274182.1	gene-mbtps2	mbtps2	membrane bound transcription factor peptidase, site 2	57	77	161	-26.55	miRNA: 3' gcUCUUGGU-CGUCUGACUCu 5' **||**|||*||:|||||||| target: 5' aaAGCTCCATGCGGACTGAGa 3'	58	77	-29.3	0.006049	target: 5' CCAUGCGGACUGAGAG 3' |||*||:||||||||* miRNA: 3' GGU-CGUCUGACUCU- 5'	no
lcr-miR-N434	rna-XM_019277371.2	gene-LOC104927042	LOC104927042	PR domain zinc finger protein 1, transcript variant X1	115	132	163	-23.31	miRNA: 3' gcUCUUGGUCGUCUGACUCu 5' |*|||:**|||||||||||* target: 5' ccAGAG--AGCAGACTGAGt 3'	19	38	-27.6	0.00061	target: 5' GCGCCAGAGAGCAGACUGAGU 3' **:||****|||||||||||* miRNA: 3' --UGG----UCGUCUGACUCU 5'	no
lcr-miR-N434	rna-XM_027273901.1	gene-LOC104919726	LOC104919726	unconventional myosin-Ic, transcript variant X1	374	393	166	-27.98	miRNA: 3' gcucuuGGUCGUCUGACUCu 5' **|*:*||||:||||||||: target: 5' gaaagtCCAGTAGACTGAGg 3'	371	390	-34.1	0.000201	target: 5' AGUCCAGUAGACUGAGGG 3' ***||||:||||||||:* miRNA: 3' ---GGUCGUCUGACUCU- 5'	no
lcr-miR-N434	rna-XM_010750935.3	gene-ttc33	ttc33	tetratricopeptide repeat domain 33, transcript variant X1	103	122	170	-27.21	miRNA: 3' gcUCUUGGUCGUCUGACUCu 5' :|||||*|||:*|||||||* target: 5' tgAGAAGCAGTCGACTGAGt 3'	103	122	-30.1	0.003621	target: 5' GCAGUCGACUGAGU 3' *|||:*|||||||* miRNA: 3' GGUCGUCUGACUCU 5'	no
lcr-miR-N434	rna-XM_027280027.1	gene-gmnc	gmnc	geminin coiled-coil domain containing	30	49	169	-26.69	miRNA: 3' gcuCUUGGUCGUCUGACUCu 5' *|*|||||**|||||||||* target: 5' ggtGAACCTCCAGACTGAGt 3'	30	49	-28	0.009708	target: 5' CCUCCAGACUGAGU 3' ||**|||||||||* miRNA: 3' GGUCGUCUGACUCU 5'	no
lcr-miR-N434	rna-XM_027279228.1	gene-srgap3	srgap3	SLIT-ROBO Rho GTPase activating protein 3, transcript variant X3	3089	3108	165	-30.16	miRNA: 3' gcuCUUGGUCGUCUGACUCu 5' *|*||:**|||||||||||| target: 5' ggtGAGAGAGCAGACTGAGa 3'	3088	3107	-32.6	0.009151	target: 5' --AGCAGACUGAGAG 3' **||||||||||||* miRNA: 3' GGUCGUCUGACUCU- 5'	no
lcr-miR-N434	rna-XM_010749629.3	gene-fgl2	fgl2	fibrinogen like 2, transcript variant X2	68	87	178	-27.7	miRNA: 3' gcUCUUGGUCGUCUGACUCu 5' |*|||||*||:||||||||| target: 5' caAGAACAAGTAGACTGAGa 3'	69	88	-31.1	0.007521	target: 5' CAAGUAGACUGAGAA 3' |*||:|||||||||* miRNA: 3' GGUCGUCUGACUCU- 5'	no
lcr-miR-N434	rna-XM_019270194.2	gene-prr18	prr18	proline rich 18	23	42	169	-26.45	miRNA: 3' gcuCUUGGUCGUCUGACUCu 5' :**|*|*||||||||||||| target: 5' tttGCAGCAGCAGACTGAGa 3'	29	48	-29.8	0.004045	target: 5' GCAGCAGACUGAGAA 3' *|||||||||||||* miRNA: 3' GGUCGUCUGACUCU- 5'	no
lcr-miR-N434	rna-XM_027275841.1	gene-ascc2	ascc2	activating signal cointegrator 1 complex subunit 2, transcript variant X2	404	422	167	-30.53	miRNA: 3' gcuCUUGGUCGUCUGACUCu 5' ||*||:||||*||||||||: target: 5' cgtGAGCCAG-AGACTGAGg 3'	403	422	-32.6	0.001636	target: 5' GCCAG-AGACUGAGGA 3' :||||*||||||||:* miRNA: 3' UGGUCGUCUGACUCU- 5'	no
lcr-miR-N434	rna-XM_010740211.3	gene-pptc7	pptc7	PTC7 protein phosphatase homolog	196	215	166	-30.26	miRNA: 3' gcUCUUGGUCGUCUGACUCu 5' *|||:|||*|*:|||||||| target: 5' agAGGACCTGGGGACTGAGa 3'	196	215	-34.3	0.002031	target: 5' CCUGGGGACUGAGAC 3' ||*|*:||||||||* miRNA: 3' GGUCGUCUGACUCU- 5'	no
lcr-miR-N498	rna-XM_027291736.1	gene-LOC104938635	LOC104938635	tetraspanin-7, transcript variant X1	509	528	161	-23.35	miRNA: 3' guUGAAGUCACUUAUGGGCACu 5' ::||||**||||**|||||||| target: 5' tgACTT--GTGATGACCCGTGa 3'	509	530	-27.8	0.00971	target: 5' --GUGAUGACCCGUGAU 3' **||||**||||||||* miRNA: 3' GUCACUUAUGGGCACU- 5'	no
lcr-miR-N498	rna-XM_019260258.2	gene-LOC104938635	LOC104938635	tetraspanin-7, transcript variant X1	509	528	161	-23.35	miRNA: 3' guUGAAGUCACUUAUGGGCACu 5' ::||||**||||**|||||||| target: 5' tgACTT--GTGATGACCCGTGa 3'	509	530	-27.8	0.00971	target: 5' --GUGAUGACCCGUGAU 3' **||||**||||||||* miRNA: 3' GUCACUUAUGGGCACU- 5'	no
lcr-miR-N501	rna-XM_010750935.3	gene-ttc33	ttc33	tetratricopeptide repeat domain 33, transcript variant X1	103	122	170	-27.21	miRNA: 3' gcUCUUGGUCGUCUGACUCu 5' :|||||*|||:*|||||||* target: 5' tgAGAAGCAGTCGACTGAGt 3'	103	122	-30.1	0.003621	target: 5' GCAGUCGACUGAGU 3' *|||:*|||||||* miRNA: 3' GGUCGUCUGACUCU 5'	no
lcr-miR-N501	rna-XM_027283116.1	gene-endov	endov	endonuclease V, transcript variant X2	1	18	161	-26.77	miRNA: 3' gcucuugGUCGUCUGACUCu 5' *****:*||||:|||||||: target: 5' --ctcgaCAGCGGACTGAGg 3'	5	24	-28.3	0.000117	target: 5' ACAGCGGACUGAGGU 3' *||||:|||||||:* miRNA: 3' GGUCGUCUGACUCU- 5'	no
lcr-miR-N501	rna-XM_010736484.3	gene-LOC104923414	LOC104923414	regulator of G-protein signaling 9	180	199	161	-23.37	miRNA: 3' gcucuugGUCGUCUGACUCu 5' :||****|||:||||||||* target: 5' tgatctaCAGTAGACTGAGc 3'	167	186	-27.9	0.005945	target: 5' UGGCUGUUGAUCUACAGUAGACUGAGC 3' :*************|||:||||||||* miRNA: 3' G-------------GUCGUCUGACUCU 5'	no
lcr-miR-N501	rna-XM_010749778.3	gene-tsen34	tsen34	tRNA splicing endonuclease subunit 34	111	129	167	-25.3	miRNA: 3' gcuCUUGGUCGUCUGACUCu 5' :**|:||||*|||||||||* target: 5' tttGGACCA-CAGACTGAGc 3'	113	132	-28	0.005284	target: 5' CCA-CAGACUGAGC 3' |||*|||||||||* miRNA: 3' GGUCGUCUGACUCU 5'	no
lcr-miR-N501	rna-XM_019270194.2	gene-prr18	prr18	proline rich 18	23	42	169	-26.45	miRNA: 3' gcuCUUGGUCGUCUGACUCu 5' :**|*|*||||||||||||| target: 5' tttGCAGCAGCAGACTGAGa 3'	29	48	-29.8	0.004045	target: 5' GCAGCAGACUGAGAA 3' *|||||||||||||* miRNA: 3' GGUCGUCUGACUCU- 5'	no
lcr-miR-N501	rna-XM_019276031.2	gene-LOC109142390	LOC109142390	beta-crystallin A1	3	24	161	-27.37	miRNA: 3' gcUCUUGGUCG--UCUGACUCu 5' *|||:||*:||**||||||||| target: 5' ggAGGACAGGCTGAGACTGAGa 3'	3	22	-31.2	0.001105	target: 5' CAGGCUGAGACUGAGAU 3' |*:||**|||||||||* miRNA: 3' GGUCG--UCUGACUCU- 5'	no
lcr-miR-N501	rna-XM_027274182.1	gene-mbtps2	mbtps2	membrane bound transcription factor peptidase, site 2	57	77	161	-26.55	miRNA: 3' gcUCUUGGU-CGUCUGACUCu 5' **||**|||*||:|||||||| target: 5' aaAGCTCCATGCGGACTGAGa 3'	58	77	-29.3	0.006049	target: 5' CCAUGCGGACUGAGAG 3' |||*||:||||||||* miRNA: 3' GGU-CGUCUGACUCU- 5'	no
lcr-miR-N501	rna-XM_027284095.1	gene-reps1	reps1	RALBP1 associated Eps domain containing 1, transcript variant X2	304	325	161	-31.44	miRNA: 3' gcUCUUG--GUCGUCUGACUCu 5' :|||:|:**|:||:|||||||| target: 5' tgAGGATGACGGCGGACTGAGa 3'	304	323	-34.5	0.003795	target: 5' UGACGGCGGACUGAGAA 3' :**|:||:||||||||* miRNA: 3' G--GUCGUCUGACUCU- 5'	no
lcr-miR-N501	rna-XM_027287150.1	gene-LOC104940319	LOC104940319	metalloreductase STEAP4	561	580	160	-25.02	miRNA: 3' gcucuuggUCGUCUGACUCu 5' |*:**|**|||||||||||: target: 5' cagccagaAGCAGACTGAGg 3'	558	577	-30	0.00955	target: 5' CCAGAAGCAGACUGAGGA 3' ||***|||||||||||:* miRNA: 3' GG---UCGUCUGACUCU- 5'	no
lcr-miR-N501	rna-XM_019265501.2	gene-LOC104938333	LOC104938333	glucocorticoid receptor	242	261	168	-26.13	miRNA: 3' gcucUUGGUCGUCUGACUCu 5' :***:||*|||||||||||| target: 5' ttttGACGAGCAGACTGAGa 3'	237	256	-33.1	0.008712	target: 5' UUUGACGAGCAGACUGAGAU 3' ****||*||||||||||||* miRNA: 3' ----UGGUCGUCUGACUCU- 5'	no
lcr-miR-N501	rna-XM_027280770.1	gene-LOC104930079	LOC104930079	latent-transforming growth factor beta-binding protein 4	12	32	160	-24.8	miRNA: 3' gcuCUUGGUC-GUCUGACUCu 5' ***|:|||:|*::|||||||| target: 5' accGGACCGGATGGACTGAGa 3'	14	33	-30.3	0.001895	target: 5' CCGGAUGGACUGAGAA 3' ||:|*::||||||||* miRNA: 3' GGUC-GUCUGACUCU- 5'	no
lcr-miR-N501	rna-XM_019276477.2	gene-LOC104919726	LOC104919726	unconventional myosin-Ic, transcript variant X1	374	393	166	-27.98	miRNA: 3' gcucuuGGUCGUCUGACUCu 5' **|*:*||||:||||||||: target: 5' gaaagtCCAGTAGACTGAGg 3'	371	390	-34.1	0.000201	target: 5' AGUCCAGUAGACUGAGGG 3' ***||||:||||||||:* miRNA: 3' ---GGUCGUCUGACUCU- 5'	no
lcr-miR-N501	rna-XM_019268081.2	gene-LOC104937961	LOC104937961	RNA-binding protein Musashi homolog 1, transcript variant X1	89	107	168	-28.62	miRNA: 3' gcUCUUGGUCGUCUGACUCu 5' **|||:|:*||||||||||| target: 5' gcAGAGCT-GCAGACTGAGa 3'	90	109	-31.8	0.006844	target: 5' CU-GCAGACUGAGAG 3' |:*|||||||||||* miRNA: 3' GGUCGUCUGACUCU- 5'	no
lcr-miR-N501	rna-XM_027291227.1	gene-twsg1	twsg1	twisted gastrulation BMP signaling modulator 1, transcript variant X1	34	53	167	-25.73	miRNA: 3' gcucuUGGUCGUCUGACUCu 5' :****|||||::|||||||: target: 5' ttcatACCAGTGGACTGAGg 3'	38	57	-29.9	0.000803	target: 5' CCAGUGGACUGAGGG 3' ||||::|||||||:* miRNA: 3' GGUCGUCUGACUCU- 5'	no
lcr-miR-N501	rna-XM_010741413.3	gene-fopnl	fopnl	FGFR1OP N-terminal like	18	39	160	-23.37	miRNA: 3' gcuCUUGGUCGU--CUGACUCu 5' |**|:|*|||||**|||||||| target: 5' cctGGAGCAGCATGGACTGAGa 3'	20	39	-28.4	0.001427	target: 5' GCAGCAUGGACUGAGAA 3' *||||**:||||||||* miRNA: 3' GGUCG--UCUGACUCU- 5'	no
lcr-miR-N501	rna-XM_010750890.3	gene-alg3	alg3	ALG3, alpha-1,3- mannosyltransferase	672	691	161	-24.18	miRNA: 3' gcucuugGUCGUCUGACUCu 5' **|*:**|||:||||||||: target: 5' aaatgtgCAGTAGACTGAGg 3'	675	694	-28.5	0.007794	target: 5' GCAGUAGACUGAGGC 3' *|||:||||||||:* miRNA: 3' GGUCGUCUGACUCU- 5'	no
lcr-miR-N501	rna-XM_010740166.3	gene-LOC104926332	LOC104926332	leucine-rich repeat transmembrane protein FLRT1, transcript variant X1	1347	1370	160	-29.72	miRNA: 3' gcUCUUGG---UCG-UCUGACUCu 5' |||||||:***|||*||||||||: target: 5' cgAGAACTGTGAGCGAGACTGAGg 3'	1345	1364	-33	0.004375	target: 5' ACUGUGAGCGAGACUGAGGA 3' ||:***|||*||||||||:* miRNA: 3' UGG---UCG-UCUGACUCU- 5'	no
lcr-miR-N501	rna-XM_019262302.2	gene-LOC104929675	LOC104929675	voltage-dependent calcium channel beta subunit-associated regulatory protein, transcript variant X1	915	933	167	-27.87	miRNA: 3' gcuCUUGGUCGUCUGACUCu 5' ***|||||||:*|||||||| target: 5' gatGAACCAGT-GACTGAGa 3'	914	933	-32.2	0.008743	target: 5' ACCAGU-GACUGAGAG 3' |||||:*||||||||* miRNA: 3' UGGUCGUCUGACUCU- 5'	no
lcr-miR-N501	rna-XM_027275330.1	gene-LOC104937278	LOC104937278	pogo transposable element with ZNF domain, transcript variant X4	61	82	168	-27.19	miRNA: 3' gcUC-UUGGUCG-UCUGACUCu 5' **||*|||||||*:|||||||* target: 5' gcAGAAACCAGCTGGACTGAGt 3'	50	69	-29.4	0.001648	target: 5' AUUUUGCAGAAACCAGCUGGACUGAGU 3' ***********||||||*:|||||||* miRNA: 3' -----------UGGUCG-UCUGACUCU 5'	no
lcr-miR-N501	rna-XM_019260011.2	gene-LOC104918135	LOC104918135	transmembrane protein 116, transcript variant X2	646	665	162	-26.79	miRNA: 3' gcUCUUGGUCGUCUGACUCu 5' :|||*|*:*||||||||||: target: 5' tgAGTAATTGCAGACTGAGg 3'	646	665	-28.4	0.009216	target: 5' AUU-GCAGACUGAGGA 3' |::*||||||||||:* miRNA: 3' UGGUCGUCUGACUCU- 5'	no
lcr-miR-N501	rna-XM_019260405.2	gene-LOC104918704	LOC104918704	myocardin-related transcription factor B, transcript variant X3	240	259	170	-26.48	miRNA: 3' gcUCUUGGUCGUCUGACUCu 5' |*:|*||::||||||||||* target: 5' ctGGTACTGGCAGACTGAGc 3'	241	260	-28.9	0.004086	target: 5' CUGGCAGACUGAGC 3' |::||||||||||* miRNA: 3' GGUCGUCUGACUCU 5'	no
lcr-miR-N501	rna-XM_019277371.2	gene-LOC104927042	LOC104927042	PR domain zinc finger protein 1, transcript variant X1	115	132	163	-23.31	miRNA: 3' gcUCUUGGUCGUCUGACUCu 5' |*|||:**|||||||||||* target: 5' ccAGAG--AGCAGACTGAGt 3'	19	38	-27.6	0.00061	target: 5' GCGCCAGAGAGCAGACUGAGU 3' **:||****|||||||||||* miRNA: 3' --UGG----UCGUCUGACUCU 5'	no
lcr-miR-N501	rna-XM_010729782.3	gene-LOC104918135	LOC104918135	transmembrane protein 116, transcript variant X2	646	665	162	-26.79	miRNA: 3' gcUCUUGGUCGUCUGACUCu 5' :|||*|*:*||||||||||: target: 5' tgAGTAATTGCAGACTGAGg 3'	646	665	-28.4	0.009216	target: 5' AUU-GCAGACUGAGGA 3' |::*||||||||||:* miRNA: 3' UGGUCGUCUGACUCU- 5'	no
lcr-miR-N501	rna-XM_019267473.2	gene-fgl2	fgl2	fibrinogen like 2, transcript variant X2	68	87	178	-27.7	miRNA: 3' gcUCUUGGUCGUCUGACUCu 5' |*|||||*||:||||||||| target: 5' caAGAACAAGTAGACTGAGa 3'	69	88	-31.1	0.007521	target: 5' CAAGUAGACUGAGAA 3' |*||:|||||||||* miRNA: 3' GGUCGUCUGACUCU- 5'	no
lcr-miR-N501	rna-XM_027284233.1	gene-LOC104931443	LOC104931443	phospholipase B1, membrane-associated-like	336	354	163	-26.24	miRNA: 3' gcuCUUGGUCGUCUGACUCu 5' ***||:|:*||||||||||| target: 5' aatGAGCT-GCAGACTGAGa 3'	338	357	-30.3	0.000997	target: 5' CU-GCAGACUGAGAU 3' |:*|||||||||||* miRNA: 3' GGUCGUCUGACUCU- 5'	no
lcr-miR-N501	rna-XM_027280330.1	gene-LOC104934173	LOC104934173	aminopeptidase RNPEPL1	508	527	174	-29.39	miRNA: 3' gcUCUUGGUCGUCUGACUCu 5' **|||::||||*|||||||| target: 5' gcAGAGTCAGCTGACTGAGa 3'	506	525	-30.6	0.004278	target: 5' AGUCAGCUGACUGAGAC 3' |::||||*||||||||* miRNA: 3' UUGGUCGUCUGACUCU- 5'	no
lcr-miR-N501	rna-XM_010755885.3	gene-polr2d	polr2d	RNA polymerase II subunit D	33	50	163	-25.56	miRNA: 3' gcUCUUGGUCGUCUGACUCu 5' |*||:|||||**|||||||| target: 5' ccAGGACCAG--GACTGAGa 3'	46	65	-30	2.4e-05	target: 5' CCAGUACUGAGACUGAGAC 3' ||||:****|||||||||* miRNA: 3' GGUCG----UCUGACUCU- 5'	no
lcr-miR-N501	rna-XM_027286841.1	gene-LOC109136851	LOC109136851	RNA binding protein fox-1 homolog 1-like, transcript variant X2	522	541	160	-21.71	miRNA: 3' gcucUUGGUCGUCUGACUCu 5' *|**|*||||:*|||||||| target: 5' ggttACCCAGTCGACTGAGa 3'	519	538	-30.4	0.002146	target: 5' UACCCAGUCGACUGAGAG 3' ***||||:*||||||||* miRNA: 3' ---GGUCGUCUGACUCU- 5'	no
lcr-miR-N501	rna-XM_019267752.2	gene-tyw5	tyw5	tRNA-yW synthesizing protein 5	845	865	165	-27.74	miRNA: 3' gcUCUUGG-UCGUCUGACUCu 5' *|||||||*||**|||||||| target: 5' agAGAACCTAGACGACTGAGa 3'	845	864	-30.3	0.005859	target: 5' CCUAGAC-GACUGAGAA 3' ||*||*|*||||||||* miRNA: 3' GG-UC-GUCUGACUCU- 5'	no
lcr-miR-N501	rna-XM_019262301.2	gene-LOC104929675	LOC104929675	voltage-dependent calcium channel beta subunit-associated regulatory protein, transcript variant X1	915	933	167	-27.87	miRNA: 3' gcuCUUGGUCGUCUGACUCu 5' ***|||||||:*|||||||| target: 5' gatGAACCAGT-GACTGAGa 3'	914	933	-32.2	0.008743	target: 5' ACCAGU-GACUGAGAG 3' |||||:*||||||||* miRNA: 3' UGGUCGUCUGACUCU- 5'	no
lcr-miR-N501	rna-XM_019260399.2	gene-LOC104918704	LOC104918704	myocardin-related transcription factor B, transcript variant X3	240	259	170	-26.48	miRNA: 3' gcUCUUGGUCGUCUGACUCu 5' |*:|*||::||||||||||* target: 5' ctGGTACTGGCAGACTGAGc 3'	241	260	-28.9	0.004086	target: 5' CUGGCAGACUGAGC 3' |::||||||||||* miRNA: 3' GGUCGUCUGACUCU 5'	no
lcr-miR-N501	rna-XM_027289822.1	gene-pms2	pms2	PMS1 homolog 2, mismatch repair system component, transcript variant X2	100	120	168	-23.15	miRNA: 3' gcuCUUG-GUCGUCUGACUCu 5' ***||||*|||*||||||||* target: 5' actGAACACAGAAGACTGAGt 3'	102	121	-25.4	0.008012	target: 5' CACAGAAGACUGAGU 3' |*|||*||||||||* miRNA: 3' G-GUCGUCUGACUCU 5'	no
lcr-miR-N501	rna-XM_027275333.1	gene-LOC104937278	LOC104937278	pogo transposable element with ZNF domain, transcript variant X4	61	82	168	-27.19	miRNA: 3' gcUC-UUGGUCG-UCUGACUCu 5' **||*|||||||*:|||||||* target: 5' gcAGAAACCAGCTGGACTGAGt 3'	50	69	-29.4	0.001648	target: 5' AUUUUGCAGAAACCAGCUGGACUGAGU 3' ***********||||||*:|||||||* miRNA: 3' -----------UGGUCG-UCUGACUCU 5'	no
lcr-miR-N501	rna-XM_027283456.1	gene-LOC104933874	LOC104933874	protocadherin-10, transcript variant X1	616	636	161	-28.33	miRNA: 3' gcUCUUGGUCG-UCUGACUCu 5' *||||:**|||*||||||||| target: 5' agAGAGAAAGCGAGACTGAGa 3'	616	635	-31.5	0.005632	target: 5' AAAGCGAGACUGAGAG 3' **|||*|||||||||* miRNA: 3' GGUCG-UCUGACUCU- 5'	no
lcr-miR-N501	rna-XM_027283455.1	gene-LOC104933874	LOC104933874	protocadherin-10, transcript variant X1	650	670	161	-28.33	miRNA: 3' gcUCUUGGUCG-UCUGACUCu 5' *||||:**|||*||||||||| target: 5' agAGAGAAAGCGAGACTGAGa 3'	650	669	-31.5	0.005806	target: 5' AAAGCGAGACUGAGAG 3' **|||*|||||||||* miRNA: 3' GGUCG-UCUGACUCU- 5'	no
lcr-miR-N501	rna-XM_019272495.2	gene-gosr1	gosr1	golgi SNAP receptor complex member 1	60	81	165	-28.04	miRNA: 3' gcUCUUG--GUCGUCUGACUCu 5' :|:||||**|||*||||||||* target: 5' tgGGAACCACAGGAGACTGAGc 3'	60	79	-30.3	0.001339	target: 5' CCACAGGAGACUGAGC 3' ||**||*||||||||* miRNA: 3' GG--UCGUCUGACUCU 5'	no
lcr-miR-N501	rna-XM_027275841.1	gene-ascc2	ascc2	activating signal cointegrator 1 complex subunit 2, transcript variant X2	404	422	167	-30.53	miRNA: 3' gcuCUUGGUCGUCUGACUCu 5' ||*||:||||*||||||||: target: 5' cgtGAGCCAG-AGACTGAGg 3'	403	422	-32.6	0.001636	target: 5' GCCAG-AGACUGAGGA 3' :||||*||||||||:* miRNA: 3' UGGUCGUCUGACUCU- 5'	no
lcr-miR-N501	rna-XM_027280027.1	gene-gmnc	gmnc	geminin coiled-coil domain containing	30	49	169	-26.69	miRNA: 3' gcuCUUGGUCGUCUGACUCu 5' *|*|||||**|||||||||* target: 5' ggtGAACCTCCAGACTGAGt 3'	30	49	-28	0.009708	target: 5' CCUCCAGACUGAGU 3' ||**|||||||||* miRNA: 3' GGUCGUCUGACUCU 5'	no
lcr-miR-N501	rna-XM_010730535.3	gene-LOC104918704	LOC104918704	myocardin-related transcription factor B, transcript variant X3	240	259	170	-26.48	miRNA: 3' gcUCUUGGUCGUCUGACUCu 5' |*:|*||::||||||||||* target: 5' ctGGTACTGGCAGACTGAGc 3'	241	260	-28.9	0.004086	target: 5' CUGGCAGACUGAGC 3' |::||||||||||* miRNA: 3' GGUCGUCUGACUCU 5'	no
lcr-miR-N501	rna-XM_019255667.2	gene-LOC104927199	LOC104927199	disintegrin and metalloproteinase domain-containing protein 19	289	308	166	-28.67	miRNA: 3' gcUCUUGGUCGUCUGACUCu 5' *|||:*|:*||||||||||| target: 5' ggAGGCCTTGCAGACTGAGa 3'	289	308	-32.3	0.001346	target: 5' CCUUGCAGACUGAGAC 3' ||**|||||||||||* miRNA: 3' GGU-CGUCUGACUCU- 5'	no
lcr-miR-N501	rna-XM_010751343.3	gene-ascc2	ascc2	activating signal cointegrator 1 complex subunit 2, transcript variant X2	404	422	167	-30.53	miRNA: 3' gcuCUUGGUCGUCUGACUCu 5' ||*||:||||*||||||||: target: 5' cgtGAGCCAG-AGACTGAGg 3'	403	422	-32.6	0.001636	target: 5' GCCAG-AGACUGAGGA 3' :||||*||||||||:* miRNA: 3' UGGUCGUCUGACUCU- 5'	no
lcr-miR-N501	rna-XM_010744322.3	gene-LOC109136851	LOC109136851	RNA binding protein fox-1 homolog 1-like, transcript variant X2	522	541	160	-21.71	miRNA: 3' gcucUUGGUCGUCUGACUCu 5' *|**|*||||:*|||||||| target: 5' ggttACCCAGTCGACTGAGa 3'	519	538	-30.4	0.002146	target: 5' UACCCAGUCGACUGAGAG 3' ***||||:*||||||||* miRNA: 3' ---GGUCGUCUGACUCU- 5'	no
lcr-miR-N501	rna-XM_019276475.2	gene-LOC104919726	LOC104919726	unconventional myosin-Ic, transcript variant X1	374	393	166	-27.98	miRNA: 3' gcucuuGGUCGUCUGACUCu 5' **|*:*||||:||||||||: target: 5' gaaagtCCAGTAGACTGAGg 3'	371	390	-34.1	0.000201	target: 5' AGUCCAGUAGACUGAGGG 3' ***||||:||||||||:* miRNA: 3' ---GGUCGUCUGACUCU- 5'	no
lcr-miR-N501	rna-XM_019278692.2	gene-LOC109143006	LOC109143006	homeobox protein pnx	50	69	166	-22.87	miRNA: 3' gcUCUUGGUCGUCUGACUCu 5' **||*::|*||||||||||* target: 5' gaAGCGTCTGCAGACTGAGt 3'	46	65	-29	0.000172	target: 5' AGCGUCUGCAGACUGAGU 3' ****:|*||||||||||* miRNA: 3' ----GGUCGUCUGACUCU 5'	no
lcr-miR-N501	rna-XM_027279228.1	gene-srgap3	srgap3	SLIT-ROBO Rho GTPase activating protein 3, transcript variant X3	3089	3108	165	-30.16	miRNA: 3' gcuCUUGGUCGUCUGACUCu 5' *|*||:**|||||||||||| target: 5' ggtGAGAGAGCAGACTGAGa 3'	3088	3107	-32.6	0.009151	target: 5' --AGCAGACUGAGAG 3' **||||||||||||* miRNA: 3' GGUCGUCUGACUCU- 5'	no
lcr-miR-N501	rna-XM_010743716.3	gene-LOC104929249	LOC104929249	thyrotropin-releasing hormone receptor	771	793	161	-27.1	miRNA: 3' gcUCUUGG---UCGUCUGACUCu 5' **:||:||***:||||||||||* target: 5' gtGGAGCCTGAGGCAGACTGAGc 3'	772	791	-31.5	0.008617	target: 5' CCUGAGGCAGACUGAGC 3' ||***:||||||||||* miRNA: 3' GG---UCGUCUGACUCU 5'	no
lcr-miR-N501	rna-XM_010749629.3	gene-fgl2	fgl2	fibrinogen like 2, transcript variant X2	68	87	178	-27.7	miRNA: 3' gcUCUUGGUCGUCUGACUCu 5' |*|||||*||:||||||||| target: 5' caAGAACAAGTAGACTGAGa 3'	69	88	-31.1	0.007521	target: 5' CAAGUAGACUGAGAA 3' |*||:|||||||||* miRNA: 3' GGUCGUCUGACUCU- 5'	no
lcr-miR-N501	rna-XM_027286807.1	gene-otoa	otoa	otoancorin	712	731	160	-31.28	miRNA: 3' gcucUUGGUCGUCUGACUCu 5' *|**:||||||||:|||||| target: 5' agcaGACCAGCAGGCTGAGa 3'	715	734	-34.6	0.000338	target: 5' CCAGCAGGCUGAGAC 3' |||||||:||||||* miRNA: 3' GGUCGUCUGACUCU- 5'	no
lcr-miR-N501	rna-XM_019269500.2	gene-tbx2	tbx2	T-box 2, transcript variant X1	499	517	160	-23.45	miRNA: 3' gcUCUUGGUCGUCUGACUCu 5' **||**||*||||||||||* target: 5' gtAGCTCC-GCAGACTGAGc 3'	489	508	-32.2	0.001028	target: 5' GCCUGUAGCUCCGCAGACUGAGC 3' :||*********||||||||||* miRNA: 3' UGGU--------CGUCUGACUCU 5'	no
lcr-miR-N501	rna-XM_010744347.3	gene-LOC104929753	LOC104929753	cysteine and glycine-rich protein 2	355	376	165	-26.07	miRNA: 3' gcUCUUGGUCG--UCUGACUCu 5' **|||||:||:**:|||||||| target: 5' gaAGAACTAGTGAGGACTGAGa 3'	356	375	-31.3	0.002735	target: 5' CUAGUGAGGACUGAGAU 3' |:||:**:||||||||* miRNA: 3' GGUCG--UCUGACUCU- 5'	no
lcr-miR-N501	rna-XM_019276476.2	gene-LOC104919726	LOC104919726	unconventional myosin-Ic, transcript variant X1	374	393	166	-27.98	miRNA: 3' gcucuuGGUCGUCUGACUCu 5' **|*:*||||:||||||||: target: 5' gaaagtCCAGTAGACTGAGg 3'	371	390	-34.1	0.000201	target: 5' AGUCCAGUAGACUGAGGG 3' ***||||:||||||||:* miRNA: 3' ---GGUCGUCUGACUCU- 5'	no
lcr-miR-N501	rna-XM_010740211.3	gene-pptc7	pptc7	PTC7 protein phosphatase homolog	196	215	166	-30.26	miRNA: 3' gcUCUUGGUCGUCUGACUCu 5' *|||:|||*|*:|||||||| target: 5' agAGGACCTGGGGACTGAGa 3'	196	215	-34.3	0.002031	target: 5' CCUGGGGACUGAGAC 3' ||*|*:||||||||* miRNA: 3' GGUCGUCUGACUCU- 5'	no
lcr-miR-N501	rna-XM_027275331.1	gene-LOC104937278	LOC104937278	pogo transposable element with ZNF domain, transcript variant X4	61	82	168	-27.19	miRNA: 3' gcUC-UUGGUCG-UCUGACUCu 5' **||*|||||||*:|||||||* target: 5' gcAGAAACCAGCTGGACTGAGt 3'	50	69	-29.4	0.001648	target: 5' AUUUUGCAGAAACCAGCUGGACUGAGU 3' ***********||||||*:|||||||* miRNA: 3' -----------UGGUCG-UCUGACUCU 5'	no
lcr-miR-N501	rna-XM_027273901.1	gene-LOC104919726	LOC104919726	unconventional myosin-Ic, transcript variant X1	374	393	166	-27.98	miRNA: 3' gcucuuGGUCGUCUGACUCu 5' **|*:*||||:||||||||: target: 5' gaaagtCCAGTAGACTGAGg 3'	371	390	-34.1	0.000201	target: 5' AGUCCAGUAGACUGAGGG 3' ***||||:||||||||:* miRNA: 3' ---GGUCGUCUGACUCU- 5'	no
lcr-miR-N501	rna-XM_027275328.1	gene-LOC104937278	LOC104937278	pogo transposable element with ZNF domain, transcript variant X4	61	82	168	-27.19	miRNA: 3' gcUC-UUGGUCG-UCUGACUCu 5' **||*|||||||*:|||||||* target: 5' gcAGAAACCAGCTGGACTGAGt 3'	50	69	-29.4	0.001648	target: 5' AUUUUGCAGAAACCAGCUGGACUGAGU 3' ***********||||||*:|||||||* miRNA: 3' -----------UGGUCG-UCUGACUCU 5'	no
lcr-miR-N501	rna-XM_019274748.2	gene-reps1	reps1	RALBP1 associated Eps domain containing 1, transcript variant X2	304	325	161	-31.44	miRNA: 3' gcUCUUG--GUCGUCUGACUCu 5' :|||:|:**|:||:|||||||| target: 5' tgAGGATGACGGCGGACTGAGa 3'	304	323	-34.5	0.003795	target: 5' UGACGGCGGACUGAGAA 3' :**|:||:||||||||* miRNA: 3' G--GUCGUCUGACUCU- 5'	no
lcr-miR-N501	rna-XM_019268089.2	gene-LOC104937961	LOC104937961	RNA-binding protein Musashi homolog 1, transcript variant X1	89	107	168	-28.62	miRNA: 3' gcUCUUGGUCGUCUGACUCu 5' **|||:|:*||||||||||| target: 5' gcAGAGCT-GCAGACTGAGa 3'	90	109	-31.8	0.006849	target: 5' CU-GCAGACUGAGAG 3' |:*|||||||||||* miRNA: 3' GGUCGUCUGACUCU- 5'	no
lcr-miR-N501	rna-XM_019254948.2	gene-epg5	epg5	ectopic P-granules autophagy protein 5 homolog	1587	1609	165	-32.14	miRNA: 3' gcUCUUGGUCGU---CUGACUCu 5' *|:||:||||||***|||||||: target: 5' agGGAGCCAGCATATGACTGAGg 3'	1586	1605	-36.4	0.000579	target: 5' CCAGCAUAUGACUGAGGG 3' ||||||***|||||||:* miRNA: 3' GGUCGU---CUGACUCU- 5'	no
lcr-miR-N501	rna-XM_010746167.3	gene-LOC104931219	LOC104931219	cdc42 effector protein 3	350	369	162	-26.59	miRNA: 3' gcUCUUGGUCGUCUGACUCu 5' :|||*::|*|:||||||||| target: 5' tgAGTGTCTGTAGACTGAGa 3'	350	369	-30	0.004909	target: 5' UCUGUAGACUGAGAA 3' :|*|:|||||||||* miRNA: 3' GGUCGUCUGACUCU- 5'	no
lcr-miR-N501	rna-XM_027289823.1	gene-pms2	pms2	PMS1 homolog 2, mismatch repair system component, transcript variant X2	100	120	168	-23.15	miRNA: 3' gcuCUUG-GUCGUCUGACUCu 5' ***||||*|||*||||||||* target: 5' actGAACACAGAAGACTGAGt 3'	102	121	-25.4	0.008012	target: 5' CACAGAAGACUGAGU 3' |*|||*||||||||* miRNA: 3' G-GUCGUCUGACUCU 5'	no
lcr-miR-N501	rna-XM_010745413.3	gene-tbx2	tbx2	T-box 2, transcript variant X1	499	517	160	-23.45	miRNA: 3' gcUCUUGGUCGUCUGACUCu 5' **||**||*||||||||||* target: 5' gtAGCTCC-GCAGACTGAGc 3'	489	508	-32.2	0.001028	target: 5' GCCUGUAGCUCCGCAGACUGAGC 3' :||*********||||||||||* miRNA: 3' UGGU--------CGUCUGACUCU 5'	no
lcr-miR-N501	rna-XM_027291233.1	gene-twsg1	twsg1	twisted gastrulation BMP signaling modulator 1, transcript variant X1	34	53	167	-25.73	miRNA: 3' gcucuUGGUCGUCUGACUCu 5' :****|||||::|||||||: target: 5' ttcatACCAGTGGACTGAGg 3'	38	57	-29.9	0.000803	target: 5' CCAGUGGACUGAGGG 3' ||||::|||||||:* miRNA: 3' GGUCGUCUGACUCU- 5'	no
lcr-miR-N501	rna-XM_027279227.1	gene-srgap3	srgap3	SLIT-ROBO Rho GTPase activating protein 3, transcript variant X3	3089	3108	165	-30.16	miRNA: 3' gcuCUUGGUCGUCUGACUCu 5' *|*||:**|||||||||||| target: 5' ggtGAGAGAGCAGACTGAGa 3'	3088	3107	-32.6	0.009151	target: 5' --AGCAGACUGAGAG 3' **||||||||||||* miRNA: 3' GGUCGUCUGACUCU- 5'	no
lcr-miR-N501	rna-XM_027275332.1	gene-LOC104937278	LOC104937278	pogo transposable element with ZNF domain, transcript variant X4	61	82	168	-27.19	miRNA: 3' gcUC-UUGGUCG-UCUGACUCu 5' **||*|||||||*:|||||||* target: 5' gcAGAAACCAGCTGGACTGAGt 3'	1690	1709	-31.3	0.009352	target: 5' AGCCGGGAGGCUGGGU 3' |:||:|*||:|||:|* miRNA: 3' UUGGUCGUCUGACUCU 5'	no
lcr-miR-N501	rna-XM_019259568.2	gene-LOC104926332	LOC104926332	leucine-rich repeat transmembrane protein FLRT1, transcript variant X1	1347	1370	160	-29.72	miRNA: 3' gcUCUUGG---UCG-UCUGACUCu 5' |||||||:***|||*||||||||: target: 5' cgAGAACTGTGAGCGAGACTGAGg 3'	1345	1364	-33	0.004375	target: 5' ACUGUGAGCGAGACUGAGGA 3' ||:***|||*||||||||:* miRNA: 3' UGG---UCG-UCUGACUCU- 5'	no
lcr-miR-N508	rna-XM_027281211.1	gene-enox2	enox2	ecto-NOX disulfide-thiol exchanger 2, transcript variant X7	150	172	163	-26.35	miRNA: 3' acUC-UGUGCGGAGACAAGUCCu 5' ||||*|||**:|||*|||||||| target: 5' tgAGCACAGATCTCAGTTCAGGa 3'	149	170	-29.7	0.004501	target: 5' CACAGAUCUCAGUUCAGGAA 3' |||*|*:|||*||||||||* miRNA: 3' GUG-C-GGAGACAAGUCCU- 5'	no
lcr-miR-N508	rna-XM_019273125.2	gene-ppp4r3a	ppp4r3a	protein phosphatase 4 regulatory subunit 3A, transcript variant X3	836	861	163	-28.5	miRNA: 3' acUCUGUGCGGAG----ACAAGUCCu 5' **||||*:||||:****||||||||| target: 5' aaAGACCTGCCTTTAAATGTTCAGGa 3'	837	858	-31.9	0.003032	target: 5' CUGCCUUUAAAUGUUCAGGAC 3' *:||||:****|||||||||* miRNA: 3' UGCGGAG----ACAAGUCCU- 5'	no
lcr-miR-N508	rna-XM_027272887.1	gene-b4galnt4	b4galnt4	beta-1,4-N-acetyl-galactosaminyltransferase 4, transcript variant X2	121	143	162	-23.77	miRNA: 3' acuCUGUG-CGGAGACAAGUCCu 5' |**||*||*|*|||*|||||||: target: 5' tttGAAACAGGCTCCGTTCAGGg 3'	122	143	-27.4	0.00508	target: 5' CAGG-CUCCGUUCAGGGA 3' ||*|*|||*|||||||:* miRNA: 3' GUGCGGAGACAAGUCCU- 5'	no
lcr-miR-N508	rna-XM_027285494.1	gene-grin2b	grin2b	glutamate ionotropic receptor NMDA type subunit 2B, transcript variant X1	1854	1873	160	-21.96	miRNA: 3' acUCUGUGCGGAGACAAGUCCu 5' **|||*|*|*||:||||||||| target: 5' acAGA-AAG-CTTTGTTCAGGa 3'	1841	1862	-34.7	0.002044	target: 5' GCGCACACAGAAAGCUUUGUUCAGGAC 3' :|||**********||:|||||||||* miRNA: 3' UGCG----------GAGACAAGUCCU- 5'	no
lcr-miR-N508	rna-XM_027285495.1	gene-grin2b	grin2b	glutamate ionotropic receptor NMDA type subunit 2B, transcript variant X1	1854	1873	160	-21.96	miRNA: 3' acUCUGUGCGGAGACAAGUCCu 5' **|||*|*|*||:||||||||| target: 5' acAGA-AAG-CTTTGTTCAGGa 3'	1841	1862	-34.7	0.002044	target: 5' GCGCACACAGAAAGCUUUGUUCAGGAC 3' :|||**********||:|||||||||* miRNA: 3' UGCG----------GAGACAAGUCCU- 5'	no
lcr-miR-N508	rna-XM_027281201.1	gene-enox2	enox2	ecto-NOX disulfide-thiol exchanger 2, transcript variant X7	150	172	163	-26.35	miRNA: 3' acUC-UGUGCGGAGACAAGUCCu 5' ||||*|||**:|||*|||||||| target: 5' tgAGCACAGATCTCAGTTCAGGa 3'	149	170	-29.7	0.004501	target: 5' CACAGAUCUCAGUUCAGGAA 3' |||*|*:|||*||||||||* miRNA: 3' GUG-C-GGAGACAAGUCCU- 5'	no
lcr-miR-N508	rna-XM_027284027.1	gene-esco2	esco2	establishment of sister chromatid cohesion N-acetyltransferase 2, transcript variant X3	139	159	166	-25.01	miRNA: 3' acUCUGUGCGGAGACAAGUCCu 5' |*|*|||:*|||*||||||||| target: 5' taATACAT-CCTGTGTTCAGGa 3'	142	163	-27.6	0.008878	target: 5' AU-CCUGUGUUCAGGAU 3' |:*|||*|||||||||* miRNA: 3' UGCGGAGACAAGUCCU- 5'	no
lcr-miR-N508	rna-XM_027281191.1	gene-enox2	enox2	ecto-NOX disulfide-thiol exchanger 2, transcript variant X7	150	172	163	-26.35	miRNA: 3' acUC-UGUGCGGAGACAAGUCCu 5' ||||*|||**:|||*|||||||| target: 5' tgAGCACAGATCTCAGTTCAGGa 3'	149	170	-29.7	0.004501	target: 5' CACAGAUCUCAGUUCAGGAA 3' |||*|*:|||*||||||||* miRNA: 3' GUG-C-GGAGACAAGUCCU- 5'	no
lcr-miR-N508	rna-XM_027279168.1	gene-LOC104932906	LOC104932906	apoptotic chromatin condensation inducer in the nucleus	107	129	165	-26.64	miRNA: 3' acucUGUGCGGAG-ACAAGUCCu 5' |***||*||||||**|||||||| target: 5' ttccACTCGCCTCAAGTTCAGGa 3'	100	121	-30.6	0.00395	target: 5' UUUCCACUCGCCUCAAGUUCAGGAC 3' *****||*||||||**||||||||* miRNA: 3' -----UGUGCGGAGA-CAAGUCCU- 5'	no
lcr-miR-N508	rna-XM_010755447.3	gene-LOC104938980	LOC104938980	actin-related protein 2/3 complex subunit 4	393	414	174	-29.7	miRNA: 3' acucUGUGCGGAGACAAGUCCu 5' |***|*|:|:|||||||||||| target: 5' tccaAAATGTCTCTGTTCAGGa 3'	398	419	-32.7	0.000602	target: 5' AUGUCUCUGUUCAGGAA 3' |:|:||||||||||||* miRNA: 3' UGCGGAGACAAGUCCU- 5'	no
lcr-miR-N508	rna-XM_019255642.2	gene-plcb3	plcb3	phospholipase C beta 3, transcript variant X2	449	469	173	-34.19	miRNA: 3' acuCUGUGCGGAGACAAGUCCu 5' *|*|:|*|||||:||||||||| target: 5' agtGGC-CGCCTTTGTTCAGGa 3'	449	470	-37.5	0.000994	target: 5' -CGCCUUUGUUCAGGAA 3' *|||||:|||||||||* miRNA: 3' UGCGGAGACAAGUCCU- 5'	no
lcr-miR-N508	rna-XM_010742571.3	gene-pacsin1	pacsin1	protein kinase C and casein kinase substrate in neurons 1	167	187	166	-29.12	miRNA: 3' acUCUGUGCGGAGACAAGUCCu 5' |||*|||:|**||||||||||| target: 5' tgAAACATG-ATCTGTTCAGGa 3'	166	187	-31.4	0.001646	target: 5' CAUGA-UCUGUUCAGGAU 3' ||:|**|||||||||||* miRNA: 3' GUGCGGAGACAAGUCCU- 5'	no
lcr-miR-N508	rna-XM_019258414.2	gene-sfswap	sfswap	splicing factor SWAP, transcript variant X1	274	295	171	-26.44	miRNA: 3' acuCUGUGCGGAGACAAGUCCu 5' ***||||:|::|:*|||||||: target: 5' gttGACATGTTTTGGTTCAGGg 3'	276	297	-29.8	0.001042	target: 5' AUGUUUUGGUUCAGGGA 3' |:|::|:*|||||||:* miRNA: 3' UGCGGAGACAAGUCCU- 5'	no
lcr-miR-N508	rna-XM_027281221.1	gene-enox2	enox2	ecto-NOX disulfide-thiol exchanger 2, transcript variant X7	150	172	163	-26.35	miRNA: 3' acUC-UGUGCGGAGACAAGUCCu 5' ||||*|||**:|||*|||||||| target: 5' tgAGCACAGATCTCAGTTCAGGa 3'	149	170	-29.7	0.004501	target: 5' CACAGAUCUCAGUUCAGGAA 3' |||*|*:|||*||||||||* miRNA: 3' GUG-C-GGAGACAAGUCCU- 5'	no
lcr-miR-N508	rna-XM_019273126.2	gene-ppp4r3a	ppp4r3a	protein phosphatase 4 regulatory subunit 3A, transcript variant X3	836	861	163	-28.5	miRNA: 3' acUCUGUGCGGAG----ACAAGUCCu 5' **||||*:||||:****||||||||| target: 5' aaAGACCTGCCTTTAAATGTTCAGGa 3'	837	858	-31.9	0.003032	target: 5' CUGCCUUUAAAUGUUCAGGAC 3' *:||||:****|||||||||* miRNA: 3' UGCGGAG----ACAAGUCCU- 5'	no
lcr-miR-N508	rna-XM_027286683.1	gene-anp32e	anp32e	acidic nuclear phosphoprotein 32 family member E, transcript variant X1	664	685	176	-31.12	miRNA: 3' acUCUGUGCGGAGACAAGUCCu 5' **:|||*||*:||||||||||| target: 5' caGGACCCGGTTCTGTTCAGGa 3'	665	686	-33.3	0.002196	target: 5' CCGGUUCUGUUCAGGAU 3' *||*:|||||||||||* miRNA: 3' UGCGGAGACAAGUCCU- 5'	no
lcr-miR-N508	rna-XM_019270557.2	gene-nr4a3	nr4a3	nuclear receptor subfamily 4 group A member 3, transcript variant X5	31	51	165	-26.13	miRNA: 3' acuCUGUGCGGAGACAAGUCCu 5' ***|*||:|:|*|||||||||* target: 5' catGTCATGTC-CTGTTCAGGc 3'	20	41	-29.9	0.000663	target: 5' AAACCCAUGUCAUGUC-CUGUUCAGGC 3' **********||:|:|*|||||||||* miRNA: 3' ----------GUGCGGAGACAAGUCCU 5'	no
lcr-miR-N508	rna-XM_027278153.1	gene-plcb3	plcb3	phospholipase C beta 3, transcript variant X2	449	469	173	-34.19	miRNA: 3' acuCUGUGCGGAGACAAGUCCu 5' *|*|:|*|||||:||||||||| target: 5' agtGGC-CGCCTTTGTTCAGGa 3'	449	470	-37.5	0.000994	target: 5' -CGCCUUUGUUCAGGAA 3' *|||||:|||||||||* miRNA: 3' UGCGGAGACAAGUCCU- 5'	no
lcr-miR-N508	rna-XM_027281232.1	gene-enox2	enox2	ecto-NOX disulfide-thiol exchanger 2, transcript variant X7	150	172	163	-26.35	miRNA: 3' acUC-UGUGCGGAGACAAGUCCu 5' ||||*|||**:|||*|||||||| target: 5' tgAGCACAGATCTCAGTTCAGGa 3'	149	170	-29.7	0.004501	target: 5' CACAGAUCUCAGUUCAGGAA 3' |||*|*:|||*||||||||* miRNA: 3' GUG-C-GGAGACAAGUCCU- 5'	no
lcr-miR-N508	rna-XM_027284028.1	gene-esco2	esco2	establishment of sister chromatid cohesion N-acetyltransferase 2, transcript variant X3	139	159	166	-25.01	miRNA: 3' acUCUGUGCGGAGACAAGUCCu 5' |*|*|||:*|||*||||||||| target: 5' taATACAT-CCTGTGTTCAGGa 3'	142	163	-27.6	0.008878	target: 5' AU-CCUGUGUUCAGGAU 3' |:*|||*|||||||||* miRNA: 3' UGCGGAGACAAGUCCU- 5'	no
lcr-miR-N508	rna-XM_019268846.2	gene-LOC104929171	LOC104929171	cysteine-rich secretory protein LCCL domain-containing 1	1383	1403	172	-30.15	miRNA: 3' acucUGUGCGGAGACAAGUCCu 5' |*:*|||*|:|||||||||||: target: 5' ttgaACA-GTCTCTGTTCAGGg 3'	1382	1403	-32.4	0.005908	target: 5' CA-GUCUCUGUUCAGGGG 3' ||*|:|||||||||||:* miRNA: 3' GUGCGGAGACAAGUCCU- 5'	no
lcr-miR-N508	rna-XM_027289233.1	gene-ascc1	ascc1	activating signal cointegrator 1 complex subunit 1, transcript variant X1	536	557	161	-28.9	miRNA: 3' acUCUGUGCGGAGA-CAAGUCCu 5' **|||*:||*:|||*|||||||| target: 5' acAGAGGCG-TTCTCGTTCAGGa 3'	537	558	-29.7	0.004146	target: 5' GCGUUCUC-GUUCAGGAG 3' :||*:|||*||||||||* miRNA: 3' UGC-GGAGACAAGUCCU- 5'	no
lcr-miR-N508	rna-XM_027281184.1	gene-enox2	enox2	ecto-NOX disulfide-thiol exchanger 2, transcript variant X7	150	172	163	-26.35	miRNA: 3' acUC-UGUGCGGAGACAAGUCCu 5' ||||*|||**:|||*|||||||| target: 5' tgAGCACAGATCTCAGTTCAGGa 3'	149	170	-29.7	0.004501	target: 5' CACAGAUCUCAGUUCAGGAA 3' |||*|*:|||*||||||||* miRNA: 3' GUG-C-GGAGACAAGUCCU- 5'	no
lcr-miR-N508	rna-XM_019258895.2	gene-ctbs	ctbs	chitobiase	96	119	162	-24.83	miRNA: 3' acuCUGUGCGGAGA--CAAGUCCu 5' ||*|||*:*|||||**|||||||: target: 5' tgtGACTTCCCTCTGAGTTCAGGg 3'	95	116	-28.7	0.002102	target: 5' CUUCCCUCUGAGUUCAGGGA 3' |*:*|||||**|||||||:* miRNA: 3' GUGCGGAGA--CAAGUCCU- 5'	no
lcr-miR-N508	rna-XM_019258413.2	gene-sfswap	sfswap	splicing factor SWAP, transcript variant X1	274	295	171	-26.44	miRNA: 3' acuCUGUGCGGAGACAAGUCCu 5' ***||||:|::|:*|||||||: target: 5' gttGACATGTTTTGGTTCAGGg 3'	276	297	-29.8	0.001042	target: 5' AUGUUUUGGUUCAGGGA 3' |:|::|:*|||||||:* miRNA: 3' UGCGGAGACAAGUCCU- 5'	no
lcr-miR-N508	rna-XM_027281229.1	gene-enox2	enox2	ecto-NOX disulfide-thiol exchanger 2, transcript variant X7	150	172	163	-26.35	miRNA: 3' acUC-UGUGCGGAGACAAGUCCu 5' ||||*|||**:|||*|||||||| target: 5' tgAGCACAGATCTCAGTTCAGGa 3'	149	170	-29.7	0.004501	target: 5' CACAGAUCUCAGUUCAGGAA 3' |||*|*:|||*||||||||* miRNA: 3' GUG-C-GGAGACAAGUCCU- 5'	no
lcr-miR-N508	rna-XM_027286230.1	gene-nr4a3	nr4a3	nuclear receptor subfamily 4 group A member 3, transcript variant X5	31	51	165	-26.13	miRNA: 3' acuCUGUGCGGAGACAAGUCCu 5' ***|*||:|:|*|||||||||* target: 5' catGTCATGTC-CTGTTCAGGc 3'	20	41	-29.9	0.000663	target: 5' AAACCCAUGUCAUGUC-CUGUUCAGGC 3' **********||:|:|*|||||||||* miRNA: 3' ----------GUGCGGAGACAAGUCCU 5'	no
lcr-miR-N508	rna-XM_019273848.2	gene-LOC104936322	LOC104936322	beta-centractin	493	514	160	-29.23	miRNA: 3' acUCUGUGCGGAGACAAGUCCu 5' **|||:*:|::|||||||:||| target: 5' gtAGATTTGTTTCTGTTCGGGa 3'	491	512	-32.1	0.006261	target: 5' AUUUGUUUCUGUUCGGGAC 3' |:*:|::|||||||:|||* miRNA: 3' UGUGCGGAGACAAGUCCU- 5'	no
lcr-miR-N508	rna-XM_010747996.3	gene-LOC104932700	LOC104932700	kunitz-type serine protease inhibitor 6, transcript variant X1	294	315	164	-23.39	miRNA: 3' acUCUGUGCGGAGACAAGUCCu 5' |*:|*:*:|*|||||||||||* target: 5' ttGGTTCTGACTCTGTTCAGGc 3'	82	103	-28.5	0.007539	target: 5' UGGAUCCAUUGGUUCUGACUCUGUUCAGGC 3' **|***************|||||||||||* miRNA: 3' UGCG--------------GAGACAAGUCCU 5'	no
lcr-miR-N508	rna-XM_019254798.2	gene-slc39a4	slc39a4	solute carrier family 39 member 4, transcript variant X2	4	27	173	-30.83	miRNA: 3' acucUGUGCGG--AGACAAGUCCu 5' *|**|||||:|**||||||||||: target: 5' agtcACACGTCGGTCTGTTCAGGg 3'	4	25	-33.3	0.001286	target: 5' ACGUCGGUCUGUUCAGGGG 3' |||:|**||||||||||:* miRNA: 3' UGCGG--AGACAAGUCCU- 5'	no
lcr-miR-N508	rna-XM_019277949.2	gene-LOC104929413	LOC104929413	dnaJ homolog subfamily C member 5-like, transcript variant X1	1187	1210	163	-30.26	miRNA: 3' acUCUG--UGCGGAGACAAGUCCu 5' *|||||**:||*:*|||||||||* target: 5' cgAGACGGGCGGTGCTGTTCAGGt 3'	1186	1207	-33.3	0.003293	target: 5' GGGCGGUGCUGUUCAGGU 3' :*||****|||||||||* miRNA: 3' UGCGGA--GACAAGUCCU 5'	no
lcr-miR-N508	rna-XM_027272712.1	gene-adat1	adat1	adenosine deaminase, tRNA specific 1, transcript variant X6	9	32	166	-22.74	miRNA: 3' acUCUGUG-CGGAG-ACAAGUCCu 5' **|*||||*|*|||*||||||||* target: 5' aaACACACTGACTCATGTTCAGGt 3'	7	28	-25.7	0.000361	target: 5' ACACUGACUCAUGUUCAGGU 3' ||*|***|||*||||||||* miRNA: 3' UGCG---GAG-ACAAGUCCU 5'	no
lcr-miR-N508	rna-XM_010741700.3	gene-slc39a4	slc39a4	solute carrier family 39 member 4, transcript variant X2	4	27	173	-30.83	miRNA: 3' acucUGUGCGG--AGACAAGUCCu 5' *|**|||||:|**||||||||||: target: 5' agtcACACGTCGGTCTGTTCAGGg 3'	4	25	-33.3	0.001286	target: 5' ACGUCGGUCUGUUCAGGGG 3' |||:|**||||||||||:* miRNA: 3' UGCGG--AGACAAGUCCU- 5'	no
lcr-miR-N508	rna-XM_019278602.2	gene-b4galnt4	b4galnt4	beta-1,4-N-acetyl-galactosaminyltransferase 4, transcript variant X2	121	143	162	-23.77	miRNA: 3' acuCUGUG-CGGAGACAAGUCCu 5' |**||*||*|*|||*|||||||: target: 5' tttGAAACAGGCTCCGTTCAGGg 3'	122	143	-27.4	0.005055	target: 5' CAGG-CUCCGUUCAGGGA 3' ||*|*|||*|||||||:* miRNA: 3' GUGCGGAGACAAGUCCU- 5'	no
lcr-miR-N508	rna-XM_010730196.3	gene-LOC104918435	LOC104918435	endophilin-A2, transcript variant X2	1606	1628	163	-24.97	miRNA: 3' acUCUGUGCGGAG-ACAAGUCCu 5' **||:|**|::||*||||||||| target: 5' caAGGCTGGTTTCTTGTTCAGGa 3'	1606	1627	-33.3	0.003061	target: 5' UGGUUUCUUGUUCAGGAU 3' **|::||*|||||||||* miRNA: 3' UGCGGAG-ACAAGUCCU- 5'	no
lcr-miR-N508	rna-XM_010756210.3	gene-LOC104939652	LOC104939652	pro-opiomelanocortin, transcript variant X2	466	487	160	-26.01	miRNA: 3' acUCUGUGCGGAGACAAGUCCu 5' *|||:|*:|*||**|||||||| target: 5' cgAGGCTTGACTGGGTTCAGGa 3'	466	487	-29.2	0.003456	target: 5' UUGACUGGGUUCAGGAA 3' *:|*||**||||||||* miRNA: 3' UGCGGAGACAAGUCCU- 5'	no
lcr-miR-N508	rna-XM_019275342.2	gene-sart3	sart3	spliceosome associated factor 3, U4/U6 recycling protein	828	848	165	-27.29	miRNA: 3' acuCUGUGCGGAGACAAGUCCu 5' ||*|||*|*|*||||||||||: target: 5' tgtGAC-CCCGTCTGTTCAGGg 3'	827	848	-30	0.006874	target: 5' C-C-CCGUCUGUUCAGGGU 3' |*|*||*||||||||||:* miRNA: 3' GUGCGG-AGACAAGUCCU- 5'	no
lcr-miR-N508	rna-XM_019265727.2	gene-cfap61	cfap61	cilia and flagella associated protein 61, transcript variant X7	375	398	160	-25.65	miRNA: 3' acucUGUGCGGAG-A-CAAGUCCu 5' ||**|||:|*|||*|*|||||||| target: 5' tgtcACATGACTCGTGGTTCAGGa 3'	374	395	-29.2	0.003839	target: 5' CAUGACUCGUGGUUCAGGAU 3' ||:|*|||***||||||||* miRNA: 3' GUGCGGAGA--CAAGUCCU- 5'	no
lcr-miR-N508	rna-XM_027286232.1	gene-nr4a3	nr4a3	nuclear receptor subfamily 4 group A member 3, transcript variant X5	31	51	165	-26.13	miRNA: 3' acuCUGUGCGGAGACAAGUCCu 5' ***|*||:|:|*|||||||||* target: 5' catGTCATGTC-CTGTTCAGGc 3'	20	41	-29.9	0.000663	target: 5' AAACCCAUGUCAUGUC-CUGUUCAGGC 3' **********||:|:|*|||||||||* miRNA: 3' ----------GUGCGGAGACAAGUCCU 5'	no
lcr-miR-N508	rna-XM_027281182.1	gene-enox2	enox2	ecto-NOX disulfide-thiol exchanger 2, transcript variant X7	150	172	163	-26.35	miRNA: 3' acUC-UGUGCGGAGACAAGUCCu 5' ||||*|||**:|||*|||||||| target: 5' tgAGCACAGATCTCAGTTCAGGa 3'	149	170	-29.7	0.004501	target: 5' CACAGAUCUCAGUUCAGGAA 3' |||*|*:|||*||||||||* miRNA: 3' GUG-C-GGAGACAAGUCCU- 5'	no
lcr-miR-N508	rna-XM_027277152.1	gene-ankfn1	ankfn1	ankyrin repeat and fibronectin type III domain containing 1, transcript variant X3	217	237	166	-26.2	miRNA: 3' acUCUGUGCGGAGACAAGUCCu 5' **||||*|||:*|*|||||||| target: 5' ccAGAC-CGCTGCGGTTCAGGa 3'	218	239	-30	0.007167	target: 5' -CGCUGCGGUUCAGGAU 3' *|||:*|*||||||||* miRNA: 3' UGCGGAGACAAGUCCU- 5'	no
lcr-miR-N508	rna-XM_019277950.2	gene-LOC104929413	LOC104929413	dnaJ homolog subfamily C member 5-like, transcript variant X1	1187	1210	163	-30.26	miRNA: 3' acUCUG--UGCGGAGACAAGUCCu 5' *|||||**:||*:*|||||||||* target: 5' cgAGACGGGCGGTGCTGTTCAGGt 3'	1186	1207	-33.3	0.003293	target: 5' GGGCGGUGCUGUUCAGGU 3' :*||****|||||||||* miRNA: 3' UGCGGA--GACAAGUCCU 5'	no
lcr-miR-N508	rna-XM_027285496.1	gene-grin2b	grin2b	glutamate ionotropic receptor NMDA type subunit 2B, transcript variant X1	1854	1873	160	-21.96	miRNA: 3' acUCUGUGCGGAGACAAGUCCu 5' **|||*|*|*||:||||||||| target: 5' acAGA-AAG-CTTTGTTCAGGa 3'	1841	1862	-34.7	0.002044	target: 5' GCGCACACAGAAAGCUUUGUUCAGGAC 3' :|||**********||:|||||||||* miRNA: 3' UGCG----------GAGACAAGUCCU- 5'	no
lcr-miR-N508	rna-XM_010752932.3	gene-anp32e	anp32e	acidic nuclear phosphoprotein 32 family member E, transcript variant X1	664	685	176	-31.12	miRNA: 3' acUCUGUGCGGAGACAAGUCCu 5' **:|||*||*:||||||||||| target: 5' caGGACCCGGTTCTGTTCAGGa 3'	665	686	-33.3	0.002196	target: 5' CCGGUUCUGUUCAGGAU 3' *||*:|||||||||||* miRNA: 3' UGCGGAGACAAGUCCU- 5'	no
lcr-miR-N508	rna-XM_019270382.2	gene-LOC104939652	LOC104939652	pro-opiomelanocortin, transcript variant X2	466	487	160	-26.01	miRNA: 3' acUCUGUGCGGAGACAAGUCCu 5' *|||:|*:|*||**|||||||| target: 5' cgAGGCTTGACTGGGTTCAGGa 3'	466	487	-29.2	0.003456	target: 5' UUGACUGGGUUCAGGAA 3' *:|*||**||||||||* miRNA: 3' UGCGGAGACAAGUCCU- 5'	no
lcr-miR-N508	rna-XM_027281239.1	gene-enox2	enox2	ecto-NOX disulfide-thiol exchanger 2, transcript variant X7	150	172	163	-26.35	miRNA: 3' acUC-UGUGCGGAGACAAGUCCu 5' ||||*|||**:|||*|||||||| target: 5' tgAGCACAGATCTCAGTTCAGGa 3'	149	170	-29.7	0.004501	target: 5' CACAGAUCUCAGUUCAGGAA 3' |||*|*:|||*||||||||* miRNA: 3' GUG-C-GGAGACAAGUCCU- 5'	no
lcr-miR-N508	rna-XM_027284505.1	gene-LOC104925682	LOC104925682	adhesion G-protein coupled receptor G2	303	324	164	-23.64	miRNA: 3' acucugUGCGGAGACAAGUCCu 5' **|***|:*|:||||||||||| target: 5' aaactaATTCTTCTGTTCAGGa 3'	308	329	-26.8	0.006341	target: 5' AUUCUUCUGUUCAGGAG 3' |:*|:|||||||||||* miRNA: 3' UGCGGAGACAAGUCCU- 5'	no
lcr-miR-N508	rna-XM_010735996.3	gene-nr4a3	nr4a3	nuclear receptor subfamily 4 group A member 3, transcript variant X5	31	51	165	-26.13	miRNA: 3' acuCUGUGCGGAGACAAGUCCu 5' ***|*||:|:|*|||||||||* target: 5' catGTCATGTC-CTGTTCAGGc 3'	20	41	-29.9	0.000663	target: 5' AAACCCAUGUCAUGUC-CUGUUCAGGC 3' **********||:|:|*|||||||||* miRNA: 3' ----------GUGCGGAGACAAGUCCU 5'	no
lcr-miR-N508	rna-XM_027285493.1	gene-grin2b	grin2b	glutamate ionotropic receptor NMDA type subunit 2B, transcript variant X1	1854	1873	160	-21.96	miRNA: 3' acUCUGUGCGGAGACAAGUCCu 5' **|||*|*|*||:||||||||| target: 5' acAGA-AAG-CTTTGTTCAGGa 3'	1841	1862	-34.7	0.002044	target: 5' GCGCACACAGAAAGCUUUGUUCAGGAC 3' :|||**********||:|||||||||* miRNA: 3' UGCG----------GAGACAAGUCCU- 5'	no
lcr-miR-N508	rna-XM_027277154.1	gene-ankfn1	ankfn1	ankyrin repeat and fibronectin type III domain containing 1, transcript variant X3	217	237	166	-26.2	miRNA: 3' acUCUGUGCGGAGACAAGUCCu 5' **||||*|||:*|*|||||||| target: 5' ccAGAC-CGCTGCGGTTCAGGa 3'	218	239	-30	0.007167	target: 5' -CGCUGCGGUUCAGGAU 3' *|||:*|*||||||||* miRNA: 3' UGCGGAGACAAGUCCU- 5'	no
lcr-miR-N508	rna-XM_010742376.3	gene-LOC104928149	LOC104928149	inward rectifier potassium channel 16	176	199	163	-27.83	miRNA: 3' acUCUGUGCGGA--GACAAGUCCu 5' *|||**|:||:|**|||||||||: target: 5' ggAGCGATGCTTAGCTGTTCAGGg 3'	176	197	-29.9	0.00327	target: 5' AUGCUUAGCUGUUCAGGGU 3' |:||:|**|||||||||:* miRNA: 3' UGCGGA--GACAAGUCCU- 5'	no
lcr-miR-N508	rna-XM_027286231.1	gene-nr4a3	nr4a3	nuclear receptor subfamily 4 group A member 3, transcript variant X5	31	51	165	-26.13	miRNA: 3' acuCUGUGCGGAGACAAGUCCu 5' ***|*||:|:|*|||||||||* target: 5' catGTCATGTC-CTGTTCAGGc 3'	20	41	-29.9	0.000663	target: 5' AAACCCAUGUCAUGUC-CUGUUCAGGC 3' **********||:|:|*|||||||||* miRNA: 3' ----------GUGCGGAGACAAGUCCU 5'	no
lcr-miR-N508	rna-XM_027278553.1	gene-musk	musk	muscle associated receptor tyrosine kinase	213	235	161	-21.66	miRNA: 3' acucUGU-GCGGAGACAAGUCCu 5' |*:*|:|*:||:||*|||||||| target: 5' ttgcATATTGCTTCAGTTCAGGa 3'	214	235	-27.4	0.007487	target: 5' AUAUUGCUUCAGUUCAGGAG 3' |***:||:||*||||||||* miRNA: 3' U---GCGGAGACAAGUCCU- 5'	no
lcr-miR-N508	rna-XM_019261406.2	gene-LOC104939173	LOC104939173	aryl hydrocarbon receptor nuclear translocator-like protein 1	199	222	167	-30.47	miRNA: 3' acUCUGUG--CGGAGACAAGUCCu 5' *|||:|*|**|||*|||||||||| target: 5' cgAGGCTCTGGCCGCTGTTCAGGa 3'	199	220	-36.1	0.002299	target: 5' UCUGGCCGCUGUUCAGGAU 3' *|**|||*||||||||||* miRNA: 3' -GUGCGGAGACAAGUCCU- 5'	no
lcr-miR-N508	rna-XM_019273127.2	gene-ppp4r3a	ppp4r3a	protein phosphatase 4 regulatory subunit 3A, transcript variant X3	836	861	163	-28.5	miRNA: 3' acUCUGUGCGGAG----ACAAGUCCu 5' **||||*:||||:****||||||||| target: 5' aaAGACCTGCCTTTAAATGTTCAGGa 3'	837	858	-31.9	0.003032	target: 5' CUGCCUUUAAAUGUUCAGGAC 3' *:||||:****|||||||||* miRNA: 3' UGCGGAG----ACAAGUCCU- 5'	no
lcr-miR-N508	rna-XM_027284029.1	gene-esco2	esco2	establishment of sister chromatid cohesion N-acetyltransferase 2, transcript variant X3	139	159	166	-25.01	miRNA: 3' acUCUGUGCGGAGACAAGUCCu 5' |*|*|||:*|||*||||||||| target: 5' taATACAT-CCTGTGTTCAGGa 3'	142	163	-27.6	0.008878	target: 5' AU-CCUGUGUUCAGGAU 3' |:*|||*|||||||||* miRNA: 3' UGCGGAGACAAGUCCU- 5'	no
lcr-miR-N508	rna-XM_010755553.2	gene-rasl12	rasl12	RAS like family 12	252	273	164	-30.53	miRNA: 3' acUCUGUGCGGAGACAAGUCCu 5' *||||||||::|:*|||:|||* target: 5' agAGACACGTTTTAGTTTAGGt 3'	252	273	-33	0.000665	target: 5' ACGUUUUAGUUUAGGU 3' |||::|:*|||:|||* miRNA: 3' UGCGGAGACAAGUCCU 5'	no
lcr-miR-N508	rna-XM_010735997.3	gene-nr4a3	nr4a3	nuclear receptor subfamily 4 group A member 3, transcript variant X5	31	51	165	-26.13	miRNA: 3' acuCUGUGCGGAGACAAGUCCu 5' ***|*||:|:|*|||||||||* target: 5' catGTCATGTC-CTGTTCAGGc 3'	20	41	-29.9	0.000663	target: 5' AAACCCAUGUCAUGUC-CUGUUCAGGC 3' **********||:|:|*|||||||||* miRNA: 3' ----------GUGCGGAGACAAGUCCU 5'	no
lcr-miR-N508	rna-XM_019258412.2	gene-sfswap	sfswap	splicing factor SWAP, transcript variant X1	274	295	171	-26.44	miRNA: 3' acuCUGUGCGGAGACAAGUCCu 5' ***||||:|::|:*|||||||: target: 5' gttGACATGTTTTGGTTCAGGg 3'	276	297	-29.8	0.001042	target: 5' AUGUUUUGGUUCAGGGA 3' |:|::|:*|||||||:* miRNA: 3' UGCGGAGACAAGUCCU- 5'	no
lcr-miR-N508	rna-XM_010747995.3	gene-LOC104932700	LOC104932700	kunitz-type serine protease inhibitor 6, transcript variant X1	294	315	164	-23.39	miRNA: 3' acUCUGUGCGGAGACAAGUCCu 5' |*:|*:*:|*|||||||||||* target: 5' ttGGTTCTGACTCTGTTCAGGc 3'	82	103	-28.5	0.007539	target: 5' UGGAUCCAUUGGUUCUGACUCUGUUCAGGC 3' **|***************|||||||||||* miRNA: 3' UGCG--------------GAGACAAGUCCU 5'	no
lcr-miR-N508	rna-XM_027277153.1	gene-ankfn1	ankfn1	ankyrin repeat and fibronectin type III domain containing 1, transcript variant X3	217	237	166	-26.2	miRNA: 3' acUCUGUGCGGAGACAAGUCCu 5' **||||*|||:*|*|||||||| target: 5' ccAGAC-CGCTGCGGTTCAGGa 3'	218	239	-30	0.007167	target: 5' -CGCUGCGGUUCAGGAU 3' *|||:*|*||||||||* miRNA: 3' UGCGGAGACAAGUCCU- 5'	no
lcr-miR-N508	rna-XM_010735998.3	gene-nr4a3	nr4a3	nuclear receptor subfamily 4 group A member 3, transcript variant X5	31	51	165	-26.13	miRNA: 3' acuCUGUGCGGAGACAAGUCCu 5' ***|*||:|:|*|||||||||* target: 5' catGTCATGTC-CTGTTCAGGc 3'	20	41	-29.9	0.000663	target: 5' AAACCCAUGUCAUGUC-CUGUUCAGGC 3' **********||:|:|*|||||||||* miRNA: 3' ----------GUGCGGAGACAAGUCCU 5'	no
lcr-miR-N508	rna-XM_027284042.1	gene-LOC104926750	LOC104926750	hippocalcin-like protein 1	419	440	163	-25.75	miRNA: 3' acuCUGUGCGGAGACAAGUCCu 5' *|*|:|*:|:|*:||||||||| target: 5' agtGGCTTGTCGTTGTTCAGGa 3'	419	440	-29.2	0.006171	target: 5' UUGUCGUUGUUCAGGAU 3' *:|:|*:|||||||||* miRNA: 3' UGCGGAGACAAGUCCU- 5'	no
lcr-miR-N508	rna-XM_019263312.2	gene-LOC104938158	LOC104938158	peptidase inhibitor 16	790	811	172	-33.52	miRNA: 3' acUCUGUGCGGAGACAAGUCCu 5' **:|*||||||**||||||||| target: 5' gaGGCCACGCCCATGTTCAGGa 3'	788	809	-36.4	0.000517	target: 5' CCACGCCCAUGUUCAGGAU 3' *||||||**|||||||||* miRNA: 3' -GUGCGGAGACAAGUCCU- 5'	no
dre-let-7i	rna-XM_019254442.2	gene-samd11	samd11	sterile alpha motif domain containing 11, transcript variant X1	2315	2337	163	-30.19	miRNA: 3' uuGUCGUGUU-UGAUGAUGGAGu 5' **::|||||:*||||||:||||| target: 5' ccTGGCACAGTACTACTGCCTCa 3'	2315	2336	-35	0.002483	target: 5' ACAGUACUACUGCCUCAG 3' |||:*||||||:|||||* miRNA: 3' UGUU-UGAUGAUGGAGU- 5'	no
dre-let-7i	rna-XM_019260114.2	gene-LOC104921629	LOC104921629	centrosomal protein of 170 kDa, transcript variant X3	1112	1136	163	-26.4	miRNA: 3' uuGUCGUGUUUG---AUGAUGGAGu 5' |*|||||:|:||****:|||||||* target: 5' acCAGCATAGACGGGAGCTACCTCc 3'	1112	1133	-31.5	0.005688	target: 5' AUAGACGGGAGCUACCUCC 3' |:|:||****:|||||||* miRNA: 3' UGUUUGA---UGAUGGAGU 5'	no
dre-let-7i	rna-XM_027277654.1	gene-slf1	slf1	SMC5-SMC6 complex localization factor 1	309	334	163	-26.74	miRNA: 3' uuGUCGUGUUUG----AUGAUGGAGu 5' **|*|:|||:||****|||||||||| target: 5' ttCTGTACAGACTGTTTACTACCTCa 3'	303	324	-30.3	0.002282	target: 5' UUCUGUACAGACUGUUUACUACCUCAA 3' ****|:|||:|||****|||||||||* miRNA: 3' ----CGUGUUUGA----UGAUGGAGU- 5'	no
dre-let-7i	rna-XM_010741006.3	gene-samd11	samd11	sterile alpha motif domain containing 11, transcript variant X1	2315	2337	163	-30.19	miRNA: 3' uuGUCGUGUU-UGAUGAUGGAGu 5' **::|||||:*||||||:||||| target: 5' ccTGGCACAGTACTACTGCCTCa 3'	2315	2336	-35	0.002483	target: 5' ACAGUACUACUGCCUCAG 3' |||:*||||||:|||||* miRNA: 3' UGUU-UGAUGAUGGAGU- 5'	no
dre-let-7i	rna-XM_019265207.1	gene-ogfod2	ogfod2	2-oxoglutarate and iron dependent oxygenase domain containing 2, transcript variant X4	47	68	168	-24.53	miRNA: 3' uuGUCGUGUUUGAUGAUGGAGu 5' |:||*::||*:||:|||||||* target: 5' agCAATGCATGCTGCTACCTCt 3'	39	60	-32.2	0.001037	target: 5' CCAGCAAUGCAUGCUGCUACCUCU 3' |**:|||*****:||:|||||||* miRNA: 3' G--UGUU-----UGAUGAUGGAGU 5'	no
dre-let-7i	rna-XM_027274496.1	gene-esrrb	esrrb	estrogen related receptor beta, transcript variant X3	2515	2536	165	-23.62	miRNA: 3' uugucGUGUUUGAUGAUGGAGu 5' *:|**::|*:|||||||||||| target: 5' cgcccTGCTGACTACTACCTCa 3'	2508	2529	-35.8	0.002196	target: 5' GCCCUGCUGACUACUACCUCAU 3' :|******:||||||||||||* miRNA: 3' UGU-----UUGAUGAUGGAGU- 5'	no
dre-let-7i	rna-XM_010745507.3	gene-lsm1	lsm1	LSM1 homolog, mRNA degradation associated	539	560	160	-23.45	miRNA: 3' uuGUCGUGUUUGAUGAUGGAGu 5' |*|||::||****||||||||| target: 5' atCAGTGCATCAGACTACCTCa 3'	530	551	-30.2	0.004378	target: 5' CAUAUCAGUGCAUCAGACUACCUCAU 3' ||:|*****:|*****|||||||||* miRNA: 3' GUGUU----UGA----UGAUGGAGU- 5'	no
dre-let-7i	rna-XM_010737354.3	gene-ccnl1	ccnl1	cyclin L1, transcript variant X2	244	265	160	-28.41	miRNA: 3' uuGUCGUGUUUGAUGAUGGAGu 5' **||||||**|||*||:||||: target: 5' ttCAGCACTCACTTCTGCCTCg 3'	245	266	-30.5	0.008041	target: 5' ACUCACUUCUGCCUCGA 3' ||**|||*||:||||:* miRNA: 3' UGUUUGAUGAUGGAGU- 5'	no
dre-let-7i	rna-XM_019271122.2	gene-LOC104927089	LOC104927089	kinesin-like protein KIF26B, transcript variant X5	103	126	163	-26.91	miRNA: 3' uuGUCGUGUUUGAU--GAUGGAGu 5' **|||||||*||||**:||||||* target: 5' ctCAGCACACACTACGTTACCTCt 3'	104	125	-30.5	0.007843	target: 5' ACACACUACGUUACCUCU 3' |||*|||||**||||||* miRNA: 3' UGUUUGAUG--AUGGAGU 5'	no
dre-let-7i	rna-XM_019265204.2	gene-ogfod2	ogfod2	2-oxoglutarate and iron dependent oxygenase domain containing 2, transcript variant X4	47	68	168	-24.53	miRNA: 3' uuGUCGUGUUUGAUGAUGGAGu 5' |:||*::||*:||:|||||||* target: 5' agCAATGCATGCTGCTACCTCt 3'	39	60	-32.2	0.001037	target: 5' CCAGCAAUGCAUGCUGCUACCUCU 3' |**:|||*****:||:|||||||* miRNA: 3' G--UGUU-----UGAUGAUGGAGU 5'	no
dre-let-7i	rna-XM_019260112.2	gene-LOC104921629	LOC104921629	centrosomal protein of 170 kDa, transcript variant X3	1112	1136	163	-26.4	miRNA: 3' uuGUCGUGUUUG---AUGAUGGAGu 5' |*|||||:|:||****:|||||||* target: 5' acCAGCATAGACGGGAGCTACCTCc 3'	1112	1133	-31.5	0.005688	target: 5' AUAGACGGGAGCUACCUCC 3' |:|:||****:|||||||* miRNA: 3' UGUUUGA---UGAUGGAGU 5'	no
dre-let-7i	rna-XM_019271121.2	gene-LOC104927089	LOC104927089	kinesin-like protein KIF26B, transcript variant X5	103	126	163	-26.91	miRNA: 3' uuGUCGUGUUUGAU--GAUGGAGu 5' **|||||||*||||**:||||||* target: 5' ctCAGCACACACTACGTTACCTCt 3'	104	125	-30.5	0.007843	target: 5' ACACACUACGUUACCUCU 3' |||*|||||**||||||* miRNA: 3' UGUUUGAUG--AUGGAGU 5'	no
dre-let-7i	rna-XM_019278867.2	gene-LOC109143048	LOC109143048	peptidyl-prolyl cis-trans isomerase A	89	110	176	-27.9	miRNA: 3' uuGUCGUGUUUGAUGAUGGAGu 5' *:::|||||:|*|:|||||||* target: 5' cgTGGCACAGAGTGCTACCTCt 3'	91	112	-33.2	0.000552	target: 5' ACAGAGUGCUACCUCU 3' |||:|*|:|||||||* miRNA: 3' UGUUUGAUGAUGGAGU 5'	no
dre-let-7i	rna-XM_019254440.2	gene-samd11	samd11	sterile alpha motif domain containing 11, transcript variant X1	2315	2337	163	-30.19	miRNA: 3' uuGUCGUGUU-UGAUGAUGGAGu 5' **::|||||:*||||||:||||| target: 5' ccTGGCACAGTACTACTGCCTCa 3'	2315	2336	-35	0.002483	target: 5' ACAGUACUACUGCCUCAG 3' |||:*||||||:|||||* miRNA: 3' UGUU-UGAUGAUGGAGU- 5'	no
dre-let-7i	rna-XM_027274495.1	gene-esrrb	esrrb	estrogen related receptor beta, transcript variant X3	2515	2536	165	-23.62	miRNA: 3' uugucGUGUUUGAUGAUGGAGu 5' *:|**::|*:|||||||||||| target: 5' cgcccTGCTGACTACTACCTCa 3'	2508	2529	-35.8	0.002196	target: 5' GCCCUGCUGACUACUACCUCAU 3' :|******:||||||||||||* miRNA: 3' UGU-----UUGAUGAUGGAGU- 5'	no
dre-let-7i	rna-XM_027282926.1	gene-ogfod2	ogfod2	2-oxoglutarate and iron dependent oxygenase domain containing 2, transcript variant X4	47	68	168	-24.53	miRNA: 3' uuGUCGUGUUUGAUGAUGGAGu 5' |:||*::||*:||:|||||||* target: 5' agCAATGCATGCTGCTACCTCt 3'	39	60	-32.2	0.001037	target: 5' CCAGCAAUGCAUGCUGCUACCUCU 3' |**:|||*****:||:|||||||* miRNA: 3' G--UGUU-----UGAUGAUGGAGU 5'	no
dre-let-7i	rna-XM_019254439.2	gene-samd11	samd11	sterile alpha motif domain containing 11, transcript variant X1	2315	2337	163	-30.19	miRNA: 3' uuGUCGUGUU-UGAUGAUGGAGu 5' **::|||||:*||||||:||||| target: 5' ccTGGCACAGTACTACTGCCTCa 3'	2315	2336	-35	0.002483	target: 5' ACAGUACUACUGCCUCAG 3' |||:*||||||:|||||* miRNA: 3' UGUU-UGAUGAUGGAGU- 5'	no
dre-let-7i	rna-XM_019260115.2	gene-LOC104921629	LOC104921629	centrosomal protein of 170 kDa, transcript variant X3	1112	1136	163	-26.4	miRNA: 3' uuGUCGUGUUUG---AUGAUGGAGu 5' |*|||||:|:||****:|||||||* target: 5' acCAGCATAGACGGGAGCTACCTCc 3'	1112	1133	-31.5	0.005688	target: 5' AUAGACGGGAGCUACCUCC 3' |:|:||****:|||||||* miRNA: 3' UGUUUGA---UGAUGGAGU 5'	no
dre-let-7i	rna-XM_027274349.1	gene-LOC104938247	LOC104938247	lipase member H	852	873	172	-31.18	miRNA: 3' uuGUCGUGUUUGAUGAUGGAGu 5' |:::|*||:|:||:|||||||| target: 5' agTGGGACGAGCTGCTACCTCa 3'	850	871	-34.3	0.000993	target: 5' GGGACGAGCUGCUACCUCAA 3' ***||:|:||:||||||||* miRNA: 3' ---UGUUUGAUGAUGGAGU- 5'	no
dre-let-7i	rna-XM_027285747.1	gene-LOC104927163	LOC104927163	potassium voltage-gated channel subfamily C member 1, transcript variant X6	1498	1519	183	-32.47	miRNA: 3' uugUCGUGUUUGAUGAUGGAGu 5' |:*:||:|||:||||||||||* target: 5' aggGGCGCAAGCTACTACCTCt 3'	1496	1517	-37	0.000534	target: 5' CGCAAGCUACUACCUCU 3' |:|||:||||||||||* miRNA: 3' GUGUUUGAUGAUGGAGU 5'	no
dre-let-7i	rna-XM_010746416.3	gene-LOC104931415	LOC104931415	protogenin B	389	410	169	-21.74	miRNA: 3' uugucGUGUUUGAUGAUGGAGu 5' *****||:|*|:|||||||||* target: 5' ttgtaCATACATTACTACCTCt 3'	27	48	-32.2	0.000503	target: 5' CUGAAGCUAAACCACUUCUACCUCAU 3' |**||:|||********||||||||* miRNA: 3' GUGUUUGAU--------GAUGGAGU- 5'	no
dre-let-7i	rna-XM_019272339.2	gene-esrrb	esrrb	estrogen related receptor beta, transcript variant X3	2515	2536	165	-23.62	miRNA: 3' uugucGUGUUUGAUGAUGGAGu 5' *:|**::|*:|||||||||||| target: 5' cgcccTGCTGACTACTACCTCa 3'	2508	2529	-35.8	0.002196	target: 5' GCCCUGCUGACUACUACCUCAU 3' :|******:||||||||||||* miRNA: 3' UGU-----UUGAUGAUGGAGU- 5'	no
dre-let-7i	rna-XM_019265206.2	gene-ogfod2	ogfod2	2-oxoglutarate and iron dependent oxygenase domain containing 2, transcript variant X4	47	68	168	-24.53	miRNA: 3' uuGUCGUGUUUGAUGAUGGAGu 5' |:||*::||*:||:|||||||* target: 5' agCAATGCATGCTGCTACCTCt 3'	39	60	-32.2	0.001037	target: 5' CCAGCAAUGCAUGCUGCUACCUCU 3' |**:|||*****:||:|||||||* miRNA: 3' G--UGUU-----UGAUGAUGGAGU 5'	no
dre-let-7i	rna-XM_027282925.1	gene-ogfod2	ogfod2	2-oxoglutarate and iron dependent oxygenase domain containing 2, transcript variant X4	47	68	168	-24.53	miRNA: 3' uuGUCGUGUUUGAUGAUGGAGu 5' |:||*::||*:||:|||||||* target: 5' agCAATGCATGCTGCTACCTCt 3'	39	60	-32.2	0.001037	target: 5' CCAGCAAUGCAUGCUGCUACCUCU 3' |**:|||*****:||:|||||||* miRNA: 3' G--UGUU-----UGAUGAUGGAGU 5'	no
dre-let-7i	rna-XM_010737420.3	gene-LOC104924162	LOC104924162	dual specificity protein kinase CLK4, transcript variant X2	13	37	165	-23.84	miRNA: 3' uuGU-CGUGUUUGA-U-GAUGGAGu 5' *|||*|||*|||||*|*|||||||| target: 5' caCATGCAAAAACTCATCTACCTCa 3'	13	34	-26.9	0.006802	target: 5' CAAAAACUCAUCUACCUCAG 3' ||*|||||***||||||||* miRNA: 3' GUGUUUGAU--GAUGGAGU- 5'	no
dre-let-7i	rna-XM_010737428.3	gene-LOC104924162	LOC104924162	dual specificity protein kinase CLK4, transcript variant X2	13	37	165	-23.84	miRNA: 3' uuGU-CGUGUUUGA-U-GAUGGAGu 5' *|||*|||*|||||*|*|||||||| target: 5' caCATGCAAAAACTCATCTACCTCa 3'	13	34	-26.9	0.006802	target: 5' CAAAAACUCAUCUACCUCAG 3' ||*|||||***||||||||* miRNA: 3' GUGUUUGAU--GAUGGAGU- 5'	no
dre-let-7i	rna-XM_019265205.2	gene-ogfod2	ogfod2	2-oxoglutarate and iron dependent oxygenase domain containing 2, transcript variant X4	47	68	168	-24.53	miRNA: 3' uuGUCGUGUUUGAUGAUGGAGu 5' |:||*::||*:||:|||||||* target: 5' agCAATGCATGCTGCTACCTCt 3'	39	60	-32.2	0.001037	target: 5' CCAGCAAUGCAUGCUGCUACCUCU 3' |**:|||*****:||:|||||||* miRNA: 3' G--UGUU-----UGAUGAUGGAGU 5'	no
dre-let-7i	rna-XM_019260116.2	gene-LOC104921629	LOC104921629	centrosomal protein of 170 kDa, transcript variant X3	1112	1136	163	-26.4	miRNA: 3' uuGUCGUGUUUG---AUGAUGGAGu 5' |*|||||:|:||****:|||||||* target: 5' acCAGCATAGACGGGAGCTACCTCc 3'	1112	1133	-31.5	0.005688	target: 5' AUAGACGGGAGCUACCUCC 3' |:|:||****:|||||||* miRNA: 3' UGUUUGA---UGAUGGAGU 5'	no
dre-let-7i	rna-XM_019271125.2	gene-LOC104927089	LOC104927089	kinesin-like protein KIF26B, transcript variant X5	103	126	163	-26.91	miRNA: 3' uuGUCGUGUUUGAU--GAUGGAGu 5' **|||||||*||||**:||||||* target: 5' ctCAGCACACACTACGTTACCTCt 3'	104	125	-30.5	0.007843	target: 5' ACACACUACGUUACCUCU 3' |||*|||||**||||||* miRNA: 3' UGUUUGAUG--AUGGAGU 5'	no
dre-let-7i	rna-XM_019254441.2	gene-samd11	samd11	sterile alpha motif domain containing 11, transcript variant X1	2315	2337	163	-30.19	miRNA: 3' uuGUCGUGUU-UGAUGAUGGAGu 5' **::|||||:*||||||:||||| target: 5' ccTGGCACAGTACTACTGCCTCa 3'	2315	2336	-35	0.002483	target: 5' ACAGUACUACUGCCUCAG 3' |||:*||||||:|||||* miRNA: 3' UGUU-UGAUGAUGGAGU- 5'	no
dre-let-7i	rna-XM_019265208.2	gene-ogfod2	ogfod2	2-oxoglutarate and iron dependent oxygenase domain containing 2, transcript variant X4	47	68	168	-24.53	miRNA: 3' uuGUCGUGUUUGAUGAUGGAGu 5' |:||*::||*:||:|||||||* target: 5' agCAATGCATGCTGCTACCTCt 3'	39	60	-32.2	0.001037	target: 5' CCAGCAAUGCAUGCUGCUACCUCU 3' |**:|||*****:||:|||||||* miRNA: 3' G--UGUU-----UGAUGAUGGAGU 5'	no
dre-let-7i	rna-XM_027274494.1	gene-esrrb	esrrb	estrogen related receptor beta, transcript variant X3	2515	2536	165	-23.62	miRNA: 3' uugucGUGUUUGAUGAUGGAGu 5' *:|**::|*:|||||||||||| target: 5' cgcccTGCTGACTACTACCTCa 3'	2508	2529	-35.8	0.002196	target: 5' GCCCUGCUGACUACUACCUCAU 3' :|******:||||||||||||* miRNA: 3' UGU-----UUGAUGAUGGAGU- 5'	no
dre-let-7i	rna-XM_019264544.2	gene-LOC104924162	LOC104924162	dual specificity protein kinase CLK4, transcript variant X2	13	37	165	-23.84	miRNA: 3' uuGU-CGUGUUUGA-U-GAUGGAGu 5' *|||*|||*|||||*|*|||||||| target: 5' caCATGCAAAAACTCATCTACCTCa 3'	13	34	-26.9	0.006802	target: 5' CAAAAACUCAUCUACCUCAG 3' ||*|||||***||||||||* miRNA: 3' GUGUUUGAU--GAUGGAGU- 5'	no
dre-let-7i	rna-XM_019272335.2	gene-esrrb	esrrb	estrogen related receptor beta, transcript variant X3	2515	2536	165	-23.62	miRNA: 3' uugucGUGUUUGAUGAUGGAGu 5' *:|**::|*:|||||||||||| target: 5' cgcccTGCTGACTACTACCTCa 3'	2508	2529	-35.8	0.002196	target: 5' GCCCUGCUGACUACUACCUCAU 3' :|******:||||||||||||* miRNA: 3' UGU-----UUGAUGAUGGAGU- 5'	no
dre-let-7i	rna-XM_010737356.3	gene-ccnl1	ccnl1	cyclin L1, transcript variant X2	244	265	160	-28.41	miRNA: 3' uuGUCGUGUUUGAUGAUGGAGu 5' **||||||**|||*||:||||: target: 5' ttCAGCACTCACTTCTGCCTCg 3'	245	266	-30.5	0.008041	target: 5' ACUCACUUCUGCCUCGA 3' ||**|||*||:||||:* miRNA: 3' UGUUUGAUGAUGGAGU- 5'	no
dre-let-7i	rna-XM_019260111.2	gene-LOC104921629	LOC104921629	centrosomal protein of 170 kDa, transcript variant X3	1112	1136	163	-26.4	miRNA: 3' uuGUCGUGUUUG---AUGAUGGAGu 5' |*|||||:|:||****:|||||||* target: 5' acCAGCATAGACGGGAGCTACCTCc 3'	1112	1133	-31.5	0.005688	target: 5' AUAGACGGGAGCUACCUCC 3' |:|:||****:|||||||* miRNA: 3' UGUUUGA---UGAUGGAGU 5'	no
dre-let-7i	rna-XM_010742811.3	gene-relt	relt	RELT, TNF receptor	10	32	171	-30.1	miRNA: 3' uuGUCGUGUU-UGAUGAUGGAGu 5' :||||:||:|*|*|:|||||||: target: 5' gaCAGTACGATAATGCTACCTCg 3'	9	30	-33.5	0.000884	target: 5' UACGAUAAUGCUACCUCGC 3' :||:|***|:|||||||:* miRNA: 3' GUGUUUG-AUGAUGGAGU- 5'	no
dre-miR-135c	rna-XM_027280566.1	gene-LOC104921143	LOC104921143	protein NPAT, transcript variant X1	54	77	172	-21.34	miRNA: 3' guguaUCCUUAUCU--UUCGGUAu 5' :*:**|||||||||**|||||||* target: 5' tctccAGGAATAGAACAAGCCATc 3'	58	79	-27	0.008614	target: 5' GGAAUAGAACAAGCCAUC 3' |||||||||**||||||* miRNA: 3' CCUUAUCUU--UCGGUAU 5'	no
dre-miR-135c	rna-XM_027280567.1	gene-LOC104921143	LOC104921143	protein NPAT, transcript variant X1	54	77	172	-21.34	miRNA: 3' guguaUCCUUAUCU--UUCGGUAu 5' :*:**|||||||||**|||||||* target: 5' tctccAGGAATAGAACAAGCCATc 3'	58	79	-27	0.008614	target: 5' GGAAUAGAACAAGCCAUC 3' |||||||||**||||||* miRNA: 3' CCUUAUCUU--UCGGUAU 5'	no
dre-miR-135c	rna-XM_010746371.3	gene-LOC104931377	LOC104931377	protein CYR61	813	836	170	-27.61	miRNA: 3' guGUAUCCU-UA-UCUUUCGGUAu 5' |:|||*|||*:|*||||||||||| target: 5' cgCATCGGAGGTCAGAAAGCCATa 3'	812	833	-30	0.005716	target: 5' CGGAGGUCAGAAAGCCAUAU 3' *|||:***|||||||||||* miRNA: 3' UCCUUA--UCUUUCGGUAU- 5'	no
dre-miR-190a	rna-XM_010752514.3	gene-snrnp48	snrnp48	small nuclear ribonucleoprotein U11/U12 subunit 48	32	53	160	-21.41	miRNA: 3' ugGAUUAUAUAGUUUGUAUAGu 5' *:||||*|*:||:|||||:||| target: 5' ctCTAACAGGTCGAACATGTCa 3'	29	50	-24.8	0.002646	target: 5' UAACAGGUCGAACAUGUCAC 3' **|***:||:|||||:|||* miRNA: 3' UAUA--UAGUUUGUAUAGU- 5'	no
dre-miR-190a	rna-XM_010750555.3	gene-abcb9	abcb9	ATP binding cassette subfamily B member 9, transcript variant X2	170	192	183	-23.01	miRNA: 3' ugGA-UUAUAUAGUUUGUAUAGu 5' |*||*|||:|||:|||||||||| target: 5' agCTGAATGTATTAAACATATCa 3'	170	191	-27.2	0.006388	target: 5' AUGUAUUAAACAUAUCAG 3' ||:|||:||||||||||* miRNA: 3' UAUAUAGUUUGUAUAGU- 5'	no
dre-miR-190a	rna-XM_019265181.2	gene-abcb9	abcb9	ATP binding cassette subfamily B member 9, transcript variant X2	170	192	183	-23.01	miRNA: 3' ugGA-UUAUAUAGUUUGUAUAGu 5' |*||*|||:|||:|||||||||| target: 5' agCTGAATGTATTAAACATATCa 3'	170	191	-27.2	0.006388	target: 5' AUGUAUUAAACAUAUCAG 3' ||:|||:||||||||||* miRNA: 3' UAUAUAGUUUGUAUAGU- 5'	no
dre-miR-190a	rna-XM_027286188.1	gene-depdc1b	depdc1b	DEP domain containing 1B, transcript variant X2	750	774	179	-27.38	miRNA: 3' ugGAUUAUAUAGU---UUGUAUAGu 5' :||||||||:|||***||||||||| target: 5' gcCTAATATGTCAATGAACATATCa 3'	749	770	-31.6	0.005191	target: 5' AUAUGUCAAUGAACAUAUCAA 3' ||||:||||***||||||||* miRNA: 3' UAUAUAGUU---UGUAUAGU- 5'	no
dre-miR-190a	rna-XM_027286187.1	gene-depdc1b	depdc1b	DEP domain containing 1B, transcript variant X2	750	774	179	-27.38	miRNA: 3' ugGAUUAUAUAGU---UUGUAUAGu 5' :||||||||:|||***||||||||| target: 5' gcCTAATATGTCAATGAACATATCa 3'	749	770	-31.6	0.005191	target: 5' AUAUGUCAAUGAACAUAUCAA 3' ||||:||||***||||||||* miRNA: 3' UAUAUAGUU---UGUAUAGU- 5'	no
dre-miR-190a	rna-XM_010730140.3	gene-depdc1b	depdc1b	DEP domain containing 1B, transcript variant X2	750	774	179	-27.38	miRNA: 3' ugGAUUAUAUAGU---UUGUAUAGu 5' :||||||||:|||***||||||||| target: 5' gcCTAATATGTCAATGAACATATCa 3'	749	770	-31.6	0.005191	target: 5' AUAUGUCAAUGAACAUAUCAA 3' ||||:||||***||||||||* miRNA: 3' UAUAUAGUU---UGUAUAGU- 5'	no
dre-miR-190a	rna-XM_010746607.3	gene-laptm4b	laptm4b	lysosomal protein transmembrane 4 beta	685	708	179	-27.86	miRNA: 3' ugGAU--UAUAUAGUUUGUAUAGu 5' |||||**:||||||:||||||||| target: 5' acCTAGTGTATATCGAACATATCa 3'	684	705	-31.4	0.004498	target: 5' GUGUAUAUCGAACAUAUCAC 3' **:||||||:|||||||||* miRNA: 3' --UAUAUAGUUUGUAUAGU- 5'	no
dre-miR-194a	rna-XM_019260814.2	gene-LOC104926245	LOC104926245	collagen alpha-1(XVIII) chain, transcript variant X1	416	436	163	-28.67	miRNA: 3' ggUGUACCUCAACGACAAUGu 5' *||||||**||||||||||:| target: 5' acACATGTTGTTGCTGTTATa 3'	416	436	-31.3	0.005067	target: 5' GUUGUUGCUGUUAUAU 3' |**||||||||||:|* miRNA: 3' CCUCAACGACAAUGU- 5'	no
dre-miR-194a	rna-XM_010752374.3	gene-dbt	dbt	dihydrolipoamide branched chain transacylase E2	793	818	162	-27.9	miRNA: 3' ggUGUACCUCAA-----CGACAAUGu 5' *|||||||*|||*****||||||||| target: 5' gcACATGGTGTTGGTCGGCTGTTACa 3'	793	813	-31.1	0.003261	target: 5' GGUGUUGGUCGGCUGUUACAU 3' ||*|||*****|||||||||* miRNA: 3' CCUCAA-----CGACAAUGU- 5'	no
dre-miR-194a	rna-XM_019262557.2	gene-LOC104923652	LOC104923652	C-C motif chemokine 20	912	932	163	-29.1	miRNA: 3' ggUGUACCUCAACGACAAUGu 5' ||||||||****||||||||| target: 5' ccACATGGCAAGGCTGTTACa 3'	911	931	-32.6	0.001835	target: 5' UGGCAAGGCUGUUACAA 3' |||****|||||||||* miRNA: 3' ACCUCAACGACAAUGU- 5'	no
dre-miR-194a	rna-XM_019260818.2	gene-LOC104926245	LOC104926245	collagen alpha-1(XVIII) chain, transcript variant X1	416	436	163	-28.67	miRNA: 3' ggUGUACCUCAACGACAAUGu 5' *||||||**||||||||||:| target: 5' acACATGTTGTTGCTGTTATa 3'	416	436	-31.3	0.005067	target: 5' GUUGUUGCUGUUAUAU 3' |**||||||||||:|* miRNA: 3' CCUCAACGACAAUGU- 5'	no
dre-miR-194a	rna-XM_019260816.2	gene-LOC104926245	LOC104926245	collagen alpha-1(XVIII) chain, transcript variant X1	416	436	163	-28.67	miRNA: 3' ggUGUACCUCAACGACAAUGu 5' *||||||**||||||||||:| target: 5' acACATGTTGTTGCTGTTATa 3'	416	436	-31.3	0.005067	target: 5' GUUGUUGCUGUUAUAU 3' |**||||||||||:|* miRNA: 3' CCUCAACGACAAUGU- 5'	no
dre-miR-194a	rna-XM_027283108.1	gene-LOC104921547	LOC104921547	SEC14-like protein 1, transcript variant X2	413	434	170	-30.65	miRNA: 3' ggUGU-ACCUCAACGACAAUGu 5' *||||*|||||**||||||||| target: 5' acACACTGGAGGCGCTGTTACa 3'	413	433	-33.1	0.006519	target: 5' UGGAGGCGCUGUUACAU 3' |||||**|||||||||* miRNA: 3' ACCUCAACGACAAUGU- 5'	no
dre-miR-194a	rna-XM_027286380.1	gene-LOC104932382	LOC104932382	hyaluronan synthase 1, transcript variant X3	280	300	167	-31.98	miRNA: 3' ggUGUACCUCAACGACAAUGu 5' :||:||||||*|||||||:|| target: 5' tcATATGGAGATGCTGTTGCa 3'	279	299	-35	0.000159	target: 5' UGGAGAUGCUGUUGCAC 3' |||||*|||||||:||* miRNA: 3' ACCUCAACGACAAUGU- 5'	no
dre-miR-194a	rna-XM_010738187.3	gene-arl14	arl14	ADP ribosylation factor like GTPase 14	462	483	166	-26.45	miRNA: 3' ggUGUACC-UCAACGACAAUGu 5' *||:||||*|**|||||||||| target: 5' acATATGGTACATGCTGTTACa 3'	462	482	-29.3	0.003924	target: 5' GGUACAUGCUGUUACAU 3' ||****||||||||||* miRNA: 3' CCUCA-ACGACAAUGU- 5'	no
dre-miR-194a	rna-XM_019260815.2	gene-LOC104926245	LOC104926245	collagen alpha-1(XVIII) chain, transcript variant X1	416	436	163	-28.67	miRNA: 3' ggUGUACCUCAACGACAAUGu 5' *||||||**||||||||||:| target: 5' acACATGTTGTTGCTGTTATa 3'	416	436	-31.3	0.005067	target: 5' GUUGUUGCUGUUAUAU 3' |**||||||||||:|* miRNA: 3' CCUCAACGACAAUGU- 5'	no
dre-miR-194a	rna-XM_027286379.1	gene-LOC104932382	LOC104932382	hyaluronan synthase 1, transcript variant X3	280	300	167	-31.98	miRNA: 3' ggUGUACCUCAACGACAAUGu 5' :||:||||||*|||||||:|| target: 5' tcATATGGAGATGCTGTTGCa 3'	279	299	-35	0.000159	target: 5' UGGAGAUGCUGUUGCAC 3' |||||*|||||||:||* miRNA: 3' ACCUCAACGACAAUGU- 5'	no
dre-miR-194a	rna-XM_027286381.1	gene-LOC104932382	LOC104932382	hyaluronan synthase 1, transcript variant X3	115	135	167	-31.98	miRNA: 3' ggUGUACCUCAACGACAAUGu 5' :||:||||||*|||||||:|| target: 5' tcATATGGAGATGCTGTTGCa 3'	114	134	-35	7.4e-05	target: 5' UGGAGAUGCUGUUGCAC 3' |||||*|||||||:||* miRNA: 3' ACCUCAACGACAAUGU- 5'	no
dre-miR-194a	rna-XM_019260820.2	gene-LOC104926245	LOC104926245	collagen alpha-1(XVIII) chain, transcript variant X1	416	436	163	-28.67	miRNA: 3' ggUGUACCUCAACGACAAUGu 5' *||||||**||||||||||:| target: 5' acACATGTTGTTGCTGTTATa 3'	416	436	-31.3	0.005067	target: 5' GUUGUUGCUGUUAUAU 3' |**||||||||||:|* miRNA: 3' CCUCAACGACAAUGU- 5'	no
dre-miR-194a	rna-XM_019260819.2	gene-LOC104926245	LOC104926245	collagen alpha-1(XVIII) chain, transcript variant X1	416	436	163	-28.67	miRNA: 3' ggUGUACCUCAACGACAAUGu 5' *||||||**||||||||||:| target: 5' acACATGTTGTTGCTGTTATa 3'	416	436	-31.3	0.005067	target: 5' GUUGUUGCUGUUAUAU 3' |**||||||||||:|* miRNA: 3' CCUCAACGACAAUGU- 5'	no
dre-miR-194a	rna-XM_019269396.2	gene-lrif1	lrif1	ligand dependent nuclear receptor interacting factor 1	231	254	161	-27.36	miRNA: 3' ggUGUACC--UC-AACGACAAUGu 5' ||||:|||**||*||*|||||||: target: 5' ccACGTGGCCAGTTTACTGTTACg 3'	230	250	-28.8	0.003669	target: 5' UGGCCAGUUUACUGUUACGUAAGGCUGUUGCU 3' |||**||||**************||||||:|* miRNA: 3' ACC--UCAA--------------CGACAAUGU 5'	no
dre-miR-194a	rna-XM_027283109.1	gene-LOC104921547	LOC104921547	SEC14-like protein 1, transcript variant X2	413	434	170	-30.65	miRNA: 3' ggUGU-ACCUCAACGACAAUGu 5' *||||*|||||**||||||||| target: 5' acACACTGGAGGCGCTGTTACa 3'	413	433	-33.1	0.006519	target: 5' UGGAGGCGCUGUUACAU 3' |||||**|||||||||* miRNA: 3' ACCUCAACGACAAUGU- 5'	no
dre-miR-31	rna-XM_027273983.1	gene-abi1	abi1	abl interactor 1, transcript variant X3	295	316	166	-20.06	miRNA: 3' gucgAUACGGUUGUAGAACGGu 5' *|**||*|:|:*|||||||||* target: 5' gatgTACGTCGTCATCTTGCCt 3'	285	306	-27.8	0.00949	target: 5' GAAGGAUGUACGUCGUCAUCUUGCCU 3' :**********|:|:*|||||||||* miRNA: 3' UA---------CGGUUGUAGAACGGU 5'	no
dre-miR-31	rna-XM_019268188.2	gene-LOC104938774	LOC104938774	uncharacterized LOC104938774, transcript variant X3	24	44	165	-21.67	miRNA: 3' gucGAUACGGUUGUAGAACGGu 5' ***||*||:|||*:|||||||* target: 5' gtaCTTTGTCAA-GTCTTGCCt 3'	26	47	-23.9	0.005864	target: 5' UGUCAA-GUCUUGCCU 3' ||:|||*:|||||||* miRNA: 3' ACGGUUGUAGAACGGU 5'	no
dre-miR-31	rna-XM_019255287.2	gene-oser1	oser1	oxidative stress responsive serine rich 1, transcript variant X2	284	305	160	-24.02	miRNA: 3' guCGAUACGGUUGUAGAACGGu 5' *||||*|**||:*:|||||||: target: 5' aaGCTCTTGCAGGGTCTTGCCg 3'	284	305	-28	0.004939	target: 5' UUG-CAGGGUCUUGCCGG 3' *||*||:*:|||||||:* miRNA: 3' -ACGGUUGUAGAACGGU- 5'	no
dre-miR-31	rna-XM_010739411.3	gene-LOC104925717	LOC104925717	ER lumen protein-retaining receptor 2	208	230	174	-28.47	miRNA: 3' gucGAUAC-GGUUGUAGAACGGu 5' :**||:||*:||:|||||||||* target: 5' tttCTGTGTTCAGCATCTTGCCt 3'	210	231	-31.1	0.00608	target: 5' UGUUCAGCAUCUUGCCU 3' ||*:||:|||||||||* miRNA: 3' AC-GGUUGUAGAACGGU 5'	no
dre-miR-31	rna-XM_010738047.3	gene-LOC104924637	LOC104924637	probable palmitoyltransferase ZDHHC14, transcript variant X3	215	236	167	-25.94	miRNA: 3' gucGAUACGGUUGUAGAACGGu 5' ***||**||||:::|||||||| target: 5' gtcCTCAGCCAGTGTCTTGCCa 3'	209	230	-32.3	0.001265	target: 5' GUCCUCAGCCAGUGUCUUGCCAA 3' :|*****||||:::||||||||* miRNA: 3' UA-----CGGUUGUAGAACGGU- 5'	no
dre-miR-31	rna-XM_027273979.1	gene-abi1	abi1	abl interactor 1, transcript variant X3	295	316	166	-20.06	miRNA: 3' gucgAUACGGUUGUAGAACGGu 5' *|**||*|:|:*|||||||||* target: 5' gatgTACGTCGTCATCTTGCCt 3'	285	306	-27.8	0.00949	target: 5' GAAGGAUGUACGUCGUCAUCUUGCCU 3' :**********|:|:*|||||||||* miRNA: 3' UA---------CGGUUGUAGAACGGU 5'	no
dre-miR-31	rna-XM_019271353.2	gene-LOC104919629	LOC104919629	cadherin-4, transcript variant X2	3381	3401	182	-34.93	miRNA: 3' guCGAUACGGUUGUAGAACGGu 5' ::|||:|||||||*|||||||| target: 5' tgGCTGTGCCAAC-TCTTGCCa 3'	3378	3399	-40.3	0.000474	target: 5' UGCCAAC-UCUUGCCAG 3' |||||||*||||||||* miRNA: 3' ACGGUUGUAGAACGGU- 5'	no
dre-miR-31	rna-XM_027273980.1	gene-abi1	abi1	abl interactor 1, transcript variant X3	295	316	166	-20.06	miRNA: 3' gucgAUACGGUUGUAGAACGGu 5' *|**||*|:|:*|||||||||* target: 5' gatgTACGTCGTCATCTTGCCt 3'	285	306	-27.8	0.00949	target: 5' GAAGGAUGUACGUCGUCAUCUUGCCU 3' :**********|:|:*|||||||||* miRNA: 3' UA---------CGGUUGUAGAACGGU 5'	no
dre-miR-31	rna-XM_010738165.3	gene-akirin1	akirin1	akirin 1	329	351	166	-26.05	miRNA: 3' gucGAUACGG-UUGUAGAACGGu 5' *|*||:||:|*||:*|||||||: target: 5' gatCTGTGTCAAATCTCTTGCCg 3'	326	347	-29.2	0.003815	target: 5' CUGUGUCAAAUCUCUUGCCGG 3' ||:||:|||***|||||||:* miRNA: 3' GAUACGGUUGU-AGAACGGU- 5'	no
dre-miR-31	rna-XM_010739014.3	gene-LOC104925401	LOC104925401	nucleoredoxin-like protein 1	388	408	165	-25.17	miRNA: 3' gucGAUACGGUUGUAGAACGGu 5' *|*||:*|||||*:|||||||| target: 5' gatCTGAGCCAA-GTCTTGCCa 3'	382	403	-28.6	0.005139	target: 5' GAUCUGAGCCAA-GUCUUGCCAU 3' *******|||||*:||||||||* miRNA: 3' A------CGGUUGUAGAACGGU- 5'	no
dre-miR-31	rna-XM_019277866.2	gene-nin	nin	ninein, transcript variant X3	425	445	174	-27.04	miRNA: 3' guCGAUACGGUUGUAGAACGGu 5' **|:|:||*|:||||||||||* target: 5' atGTTGTG-CGACATCTTGCCt 3'	426	447	-31.9	0.003045	target: 5' UG-CGACAUCUUGCCU 3' ||*|:||||||||||* miRNA: 3' ACGGUUGUAGAACGGU 5'	no
dre-miR-31	rna-XM_010751858.3	gene-dcp2	dcp2	decapping mRNA 2, transcript variant X1	14	36	163	-23	miRNA: 3' guCGAUACG-GUUGUAGAACGGu 5' **|||:|||*:*:|*|||||||* target: 5' gtGCTGTGCTTTGCTTCTTGCCt 3'	15	36	-30.8	0.00129	target: 5' UGCUUUGCUUCUUGCCU 3' |||:**:|*|||||||* miRNA: 3' ACGGU-UGUAGAACGGU 5'	no
dre-miR-31	rna-XM_027273982.1	gene-abi1	abi1	abl interactor 1, transcript variant X3	295	316	166	-20.06	miRNA: 3' gucgAUACGGUUGUAGAACGGu 5' *|**||*|:|:*|||||||||* target: 5' gatgTACGTCGTCATCTTGCCt 3'	285	306	-27.8	0.00949	target: 5' GAAGGAUGUACGUCGUCAUCUUGCCU 3' :**********|:|:*|||||||||* miRNA: 3' UA---------CGGUUGUAGAACGGU 5'	no
dre-miR-31	rna-XM_027273985.1	gene-abi1	abi1	abl interactor 1, transcript variant X3	295	316	166	-20.06	miRNA: 3' gucgAUACGGUUGUAGAACGGu 5' *|**||*|:|:*|||||||||* target: 5' gatgTACGTCGTCATCTTGCCt 3'	285	306	-27.8	0.00949	target: 5' GAAGGAUGUACGUCGUCAUCUUGCCU 3' :**********|:|:*|||||||||* miRNA: 3' UA---------CGGUUGUAGAACGGU 5'	no
dre-miR-31	rna-XM_010738048.3	gene-LOC104924637	LOC104924637	probable palmitoyltransferase ZDHHC14, transcript variant X3	215	236	167	-25.94	miRNA: 3' gucGAUACGGUUGUAGAACGGu 5' ***||**||||:::|||||||| target: 5' gtcCTCAGCCAGTGTCTTGCCa 3'	209	230	-32.3	0.001265	target: 5' GUCCUCAGCCAGUGUCUUGCCAA 3' :|*****||||:::||||||||* miRNA: 3' UA-----CGGUUGUAGAACGGU- 5'	no
dre-miR-31	rna-XM_027273987.1	gene-abi1	abi1	abl interactor 1, transcript variant X3	295	316	166	-20.06	miRNA: 3' gucgAUACGGUUGUAGAACGGu 5' *|**||*|:|:*|||||||||* target: 5' gatgTACGTCGTCATCTTGCCt 3'	285	306	-27.8	0.00949	target: 5' GAAGGAUGUACGUCGUCAUCUUGCCU 3' :**********|:|:*|||||||||* miRNA: 3' UA---------CGGUUGUAGAACGGU 5'	no
dre-miR-31	rna-XM_010750209.3	gene-rad17	rad17	RAD17 checkpoint clamp loader component	292	313	170	-25.41	miRNA: 3' gucgAUACGGUUGUAGAACGGu 5' ****|:||**|||||||||||| target: 5' ataaTGTGAAAACATCTTGCCa 3'	295	316	-29.3	0.006562	target: 5' UGAAAACAUCUUGCCAU 3' ||**||||||||||||* miRNA: 3' ACGGUUGUAGAACGGU- 5'	no
dre-miR-31	rna-XM_027287965.1	gene-LOC104938774	LOC104938774	uncharacterized LOC104938774, transcript variant X3	24	44	165	-21.67	miRNA: 3' gucGAUACGGUUGUAGAACGGu 5' ***||*||:|||*:|||||||* target: 5' gtaCTTTGTCAA-GTCTTGCCt 3'	26	47	-23.9	0.005864	target: 5' UGUCAA-GUCUUGCCU 3' ||:|||*:|||||||* miRNA: 3' ACGGUUGUAGAACGGU 5'	no
dre-miR-31	rna-XM_027273978.1	gene-abi1	abi1	abl interactor 1, transcript variant X3	295	316	166	-20.06	miRNA: 3' gucgAUACGGUUGUAGAACGGu 5' *|**||*|:|:*|||||||||* target: 5' gatgTACGTCGTCATCTTGCCt 3'	285	306	-27.8	0.00949	target: 5' GAAGGAUGUACGUCGUCAUCUUGCCU 3' :**********|:|:*|||||||||* miRNA: 3' UA---------CGGUUGUAGAACGGU 5'	no
dre-miR-31	rna-XM_027273984.1	gene-abi1	abi1	abl interactor 1, transcript variant X3	295	316	166	-20.06	miRNA: 3' gucgAUACGGUUGUAGAACGGu 5' *|**||*|:|:*|||||||||* target: 5' gatgTACGTCGTCATCTTGCCt 3'	285	306	-27.8	0.00949	target: 5' GAAGGAUGUACGUCGUCAUCUUGCCU 3' :**********|:|:*|||||||||* miRNA: 3' UA---------CGGUUGUAGAACGGU 5'	no
dre-miR-31	rna-XM_019255288.2	gene-oser1	oser1	oxidative stress responsive serine rich 1, transcript variant X2	284	305	160	-24.02	miRNA: 3' guCGAUACGGUUGUAGAACGGu 5' *||||*|**||:*:|||||||: target: 5' aaGCTCTTGCAGGGTCTTGCCg 3'	284	305	-28	0.004939	target: 5' UUG-CAGGGUCUUGCCGG 3' *||*||:*:|||||||:* miRNA: 3' -ACGGUUGUAGAACGGU- 5'	no
dre-miR-31	rna-XM_027275439.1	gene-dcp2	dcp2	decapping mRNA 2, transcript variant X1	14	36	163	-23	miRNA: 3' guCGAUACG-GUUGUAGAACGGu 5' **|||:|||*:*:|*|||||||* target: 5' gtGCTGTGCTTTGCTTCTTGCCt 3'	15	36	-30.8	0.00129	target: 5' UGCUUUGCUUCUUGCCU 3' |||:**:|*|||||||* miRNA: 3' ACGGU-UGUAGAACGGU 5'	no
dre-miR-31	rna-XM_027273981.1	gene-abi1	abi1	abl interactor 1, transcript variant X3	295	316	166	-20.06	miRNA: 3' gucgAUACGGUUGUAGAACGGu 5' *|**||*|:|:*|||||||||* target: 5' gatgTACGTCGTCATCTTGCCt 3'	285	306	-27.8	0.00949	target: 5' GAAGGAUGUACGUCGUCAUCUUGCCU 3' :**********|:|:*|||||||||* miRNA: 3' UA---------CGGUUGUAGAACGGU 5'	no
dre-miR-31	rna-XM_010733711.3	gene-LOC104921238	LOC104921238	transmembrane protein 248-like	733	755	167	-26.59	miRNA: 3' guCGAUACGGUUGU-AGAACGGu 5' |||||:|||*|:::*|||||||* target: 5' caGCTGTGCAAGTGTTCTTGCCt 3'	732	753	-31.7	0.0033	target: 5' GUGCAAGUGUUCUUGCCU 3' :|||*|:::*|||||||* miRNA: 3' UACGGUUGU-AGAACGGU 5'	no
dre-miR-31	rna-XM_019271354.2	gene-LOC104919629	LOC104919629	cadherin-4, transcript variant X2	3381	3401	182	-34.93	miRNA: 3' guCGAUACGGUUGUAGAACGGu 5' ::|||:|||||||*|||||||| target: 5' tgGCTGTGCCAAC-TCTTGCCa 3'	3378	3399	-40.3	0.000474	target: 5' UGCCAAC-UCUUGCCAG 3' |||||||*||||||||* miRNA: 3' ACGGUUGUAGAACGGU- 5'	no
dre-miR-31	rna-XM_010751871.3	gene-LOC104935954	LOC104935954	regulator of G-protein signaling 21	394	415	164	-26.24	miRNA: 3' gucgauACGGUUGUAGAACGGu 5' :|****||:|*||:|||||||: target: 5' taagacTGTCCACGTCTTGCCg 3'	395	416	-28.8	0.006682	target: 5' GU-CC-ACGUCUUGCCGA 3' :|*||*||:|||||||:* miRNA: 3' UACGGUUGUAGAACGGU- 5'	no
dre-miR-31	rna-XM_019264299.2	gene-dcp2	dcp2	decapping mRNA 2, transcript variant X1	31	53	163	-23	miRNA: 3' guCGAUACG-GUUGUAGAACGGu 5' **|||:|||*:*:|*|||||||* target: 5' gtGCTGTGCTTTGCTTCTTGCCt 3'	32	53	-30.8	0.001375	target: 5' UGCUUUGCUUCUUGCCU 3' |||:**:|*|||||||* miRNA: 3' ACGGU-UGUAGAACGGU 5'	no
dre-miR-31	rna-XM_019277286.2	gene-LOC104918811	LOC104918811	axin-2	432	453	171	-26.94	miRNA: 3' gucGAUACGGUUGUAGAACGGu 5' |:*||:*||:|:|:|||||||* target: 5' cgcCTGCGCTAGCGTCTTGCCc 3'	1357	1378	-35.4	0.001021	target: 5' GUGCCUACAUGGAUUCUUGCCGU 3' :||||*|||*****|||||||:* miRNA: 3' UACGGUUGU-----AGAACGGU- 5'	no
[truncated: 41 more rows]
