# Supplementary material for: Comparative Transcriptomics Reveals the microRNA-Mediated Immune Response of Large Yellow Croaker (Larimichthys crocea) to Pseudomonas plecoglossicida Infection
Source: MDPI journal article supplement (doi:10.3390/fishes8010010), 2022-12-23
Supplement: s1 [file s1 › Table S10.xlsx]

## Sheet: Table S10
Table S10 Overview information of DEmiRNA target genes at 24 h
miRNA name	Target transcript ID	Target gene ID	Target gene name	Target gene description	start_miranda	end_miranda	score_miranda	energy_miranda	paired_miranda	start_rnahybrid	end_rnahybrid	energy_rnahybrid	pvalue_rnahybrid	paired_rnahybrid	miRTarBase
NC_040016.1_5802	rna-XM_027273242.1	gene-LOC113744298	LOC113744298	transcription regulator protein BACH1-like, transcript variant X1	1107	1130	166	-25.51	miRNA: 3' ugUGACGUCGUC---GAGUAAUGc 5' |||*||:|||||***||||||||* target: 5' acAGTGTAGCAGTGTCTCATTACa 3'	1105	1125	-31.6	0.007144	target: 5' GUAGCAGUGUCUCAUUACA 3' |:|||||:***|||||||* miRNA: 3' CGUCGUCG---AGUAAUGC 5'	no
NC_040016.1_5802	rna-XM_010731144.3	gene-LOC104919200	LOC104919200	ATP-sensitive inward rectifier potassium channel 1	241	260	169	-21.99	miRNA: 3' ugUGACGUCGUCGAGUAAUGc 5' *::||*|||::|||||||||* target: 5' ttGCT-CAGTGGCTCATTACa 3'	242	262	-30.1	0.006896	target: 5' CAGUGGCUCAUUACA 3' |||::|||||||||* miRNA: 3' GUCGUCGAGUAAUGC 5'	no
NC_040016.1_5802	rna-XM_027281195.1	gene-plekhg4	plekhg4	pleckstrin homology and RhoGEF domain containing G4, transcript variant X5	1	19	160	-25.31	miRNA: 3' ugugACGUCG-UCGAGUAAUGc 5' ****|*|:||*:|||||||||| target: 5' ---aTACGGCTGGCTCATTACg 3'	1	21	-26.2	0.001073	target: 5' CU--GGCUCAUUACGC 3' |***:||||||||||* miRNA: 3' GUCGUCGAGUAAUGC- 5'	no
NC_040016.1_5802	rna-XM_019267366.2	gene-syn3	syn3	synapsin III	2076	2096	165	-26.02	miRNA: 3' ugugACGUCGUCGAGUAAUGc 5' |*:*||||||||:|||||:|* target: 5' aagaTGCAGCAGTTCATTGCc 3'	2067	2087	-33.3	0.004886	target: 5' CAAGAUGCAGCAGUUCAUUGCC 3' *****||||||||:|||||:|* miRNA: 3' -----ACGUCGUCGAGUAAUGC 5'	no
NC_040016.1_5802	rna-XM_027288942.1	gene-LOC104925101	LOC104925101	opsin-5	3446	3466	176	-28.6	miRNA: 3' ugugaCGUCGUCGAGUAAUGc 5' |||**|:|||||||||||||* target: 5' acaggGTAGCAGCTCATTACt 3'	3442	3462	-34.2	0.009301	target: 5' GUAGCAGCUCAUUACU 3' |:|||||||||||||* miRNA: 3' CGUCGUCGAGUAAUGC 5'	no
NC_040016.1_5802	rna-XM_027274248.1	gene-LOC104927518	LOC104927518	sialic acid-binding Ig-like lectin 12, transcript variant X2	152	173	170	-23.52	miRNA: 3' ugUGACGUCGUCG-AGUAAUGc 5' |:||||||||**|*|||||||* target: 5' atACTGCAGCTTCATCATTACt 3'	151	171	-30.1	0.00238	target: 5' GCAGCUUCAUCAUUACU 3' |||||**|*|||||||* miRNA: 3' CGUCGUCG-AGUAAUGC 5'	no
NC_040016.1_5802	rna-XM_027274944.1	gene-traf3	traf3	TNF receptor associated factor 3	345	365	171	-23.25	miRNA: 3' ugUGACGUCGUCGAGUAAUGc 5' |||:||:*||*|||||||||* target: 5' acATTGTTGCTGCTCATTACt 3'	344	364	-30.8	0.004514	target: 5' GUUGCUGCUCAUUACU 3' |:*||*|||||||||* miRNA: 3' CGUCGUCGAGUAAUGC 5'	no
NC_040016.1_5802	rna-XM_027273418.1	gene-htatsf1	htatsf1	HIV-1 Tat specific factor 1, transcript variant X1	56	78	166	-30.95	miRNA: 3' ugUGACGUCG--UCGAGUAAUGc 5' :*||||||||**|||||||||:| target: 5' gaACTGCAGCAAAGCTCATTATg 3'	57	77	-35.1	9e-06	target: 5' CAGCAAAGCUCAUUAUGG 3' ||||**|||||||||:|* miRNA: 3' GUCG--UCGAGUAAUGC- 5'	no
NC_040016.1_5802	rna-XM_027274247.1	gene-LOC104927518	LOC104927518	sialic acid-binding Ig-like lectin 12, transcript variant X2	152	173	170	-23.52	miRNA: 3' ugUGACGUCGUCG-AGUAAUGc 5' |:||||||||**|*|||||||* target: 5' atACTGCAGCTTCATCATTACt 3'	151	171	-30.1	0.00238	target: 5' GCAGCUUCAUCAUUACU 3' |||||**|*|||||||* miRNA: 3' CGUCGUCG-AGUAAUGC 5'	no
NC_040016.1_5802	rna-XM_010744049.3	gene-rabep2	rabep2	rabaptin, RAB GTPase binding effector protein 2	315	334	169	-22.15	miRNA: 3' ugUGACGUCGUCGAGUAAUGc 5' :|||||:|*|||*|||||||* target: 5' gcACTGTATCAG-TCATTACt 3'	314	334	-27.7	0.009095	target: 5' GUAUCAG-UCAUUACU 3' |:|*|||*|||||||* miRNA: 3' CGUCGUCGAGUAAUGC 5'	no
NC_040016.1_5802	rna-XM_027273241.1	gene-LOC113744298	LOC113744298	transcription regulator protein BACH1-like, transcript variant X1	1107	1130	166	-25.51	miRNA: 3' ugUGACGUCGUC---GAGUAAUGc 5' |||*||:|||||***||||||||* target: 5' acAGTGTAGCAGTGTCTCATTACa 3'	1105	1125	-31.6	0.007144	target: 5' GUAGCAGUGUCUCAUUACA 3' |:|||||:***|||||||* miRNA: 3' CGUCGUCG---AGUAAUGC 5'	no
NC_040016.1_5802	rna-XM_010736524.3	gene-shpk	shpk	sedoheptulokinase	481	503	177	-29.24	miRNA: 3' ugUGAC-GUCGUC-GAGUAAUGc 5' *|||||*||||||*||||||||* target: 5' ccACTGACAGCAGCCTCATTACa 3'	481	501	-34.5	0.000675	target: 5' ACAGCAGCCUCAUUACA 3' *|||||||*|||||||* miRNA: 3' -GUCGUCG-AGUAAUGC 5'	no
NC_040016.1_5802	rna-XM_027285417.1	gene-LOC104925614	LOC104925614	mucin-5AC, transcript variant X3	394	414	167	-23.56	miRNA: 3' ugUGACGUCGUCGAGUAAUGc 5' |*|||||||:|*|||||||:* target: 5' agACTGCAGTAACTCATTATa 3'	395	415	-29.8	0.003122	target: 5' CAGUAACUCAUUAUA 3' |||:|*|||||||:* miRNA: 3' GUCGUCGAGUAAUGC 5'	no
NC_040016.1_5802	rna-XM_027273420.1	gene-htatsf1	htatsf1	HIV-1 Tat specific factor 1, transcript variant X1	56	78	166	-30.95	miRNA: 3' ugUGACGUCG--UCGAGUAAUGc 5' :*||||||||**|||||||||:| target: 5' gaACTGCAGCAAAGCTCATTATg 3'	57	77	-35.1	9e-06	target: 5' CAGCAAAGCUCAUUAUGG 3' ||||**|||||||||:|* miRNA: 3' GUCG--UCGAGUAAUGC- 5'	no
NC_040016.1_5802	rna-XM_010736452.3	gene-LOC104923382	LOC104923382	nuclear distribution protein nudE homolog 1	910	931	174	-26.45	miRNA: 3' ugUGACGUCGUCG-AGUAAUGc 5' :||||*:||||||*|||||||* target: 5' gcACTTTAGCAGCTTCATTACa 3'	909	929	-32	0.003025	target: 5' UUAGCAGCUUCAUUACA 3' *:||||||*|||||||* miRNA: 3' CGUCGUCG-AGUAAUGC 5'	no
NC_040016.1_5802	rna-XM_027283237.1	gene-LOC113746652	LOC113746652	uncharacterized LOC113746652	218	237	161	-23.97	miRNA: 3' ugUGACGUCGUCGAGUAAUGc 5' *:|||*||||||:||||||:* target: 5' ttACT-CAGCAGTTCATTATa 3'	218	238	-29.8	0.000702	target: 5' CAGCAGUUCAUUAUA 3' ||||||:||||||:* miRNA: 3' GUCGUCGAGUAAUGC 5'	no
NC_040016.1_5802	rna-XM_027273419.1	gene-htatsf1	htatsf1	HIV-1 Tat specific factor 1, transcript variant X1	56	78	166	-30.95	miRNA: 3' ugUGACGUCG--UCGAGUAAUGc 5' :*||||||||**|||||||||:| target: 5' gaACTGCAGCAAAGCTCATTATg 3'	57	77	-35.1	9e-06	target: 5' CAGCAAAGCUCAUUAUGG 3' ||||**|||||||||:|* miRNA: 3' GUCG--UCGAGUAAUGC- 5'	no
NC_040016.1_5802	rna-XM_019254505.2	gene-cdk2ap2	cdk2ap2	cyclin dependent kinase 2 associated protein 2	447	467	166	-25.71	miRNA: 3' uguGACGUCGUCGAGUAAUGc 5' ||*|||||||*||||||||:* target: 5' actCTGCAGCCGCTCATTATt 3'	446	466	-31.9	0.00129	target: 5' GCAGCCGCUCAUUAUU 3' |||||*||||||||:* miRNA: 3' CGUCGUCGAGUAAUGC 5'	no
NC_040021.1_11376	rna-XM_027275408.1	gene-LOC113744700	LOC113744700	zinc finger protein 665-like	124	141	163	-21.18	miRNA: 3' acaGUCUUCCUCCGAGAg 5' ***||*|:|||||||||* target: 5' cacCATAGGGAGGCTCTg 3'	126	143	-26.7	0.00332	target: 5' AGGGAGGCUCUG 3' |:|||||||||* miRNA: 3' UUCCUCCGAGAG 5'	no
NC_040021.1_11376	rna-XM_027285776.1	gene-farsa	farsa	phenylalanyl-tRNA synthetase subunit alpha	177	194	167	-21.96	miRNA: 3' acaGUCUUCCUCCGAGAg 5' |**|||||*||||||||* target: 5' tagCAGAAAGAGGCTCTg 3'	174	191	-27	0.006196	target: 5' CAGAAAGAGGCUCUG 3' |||||*||||||||* miRNA: 3' GUCUUCCUCCGAGAG 5'	no
NC_040021.1_11376	rna-XM_027291271.1	gene-LOC104932394	LOC104932394	interphotoreceptor matrix proteoglycan 2, transcript variant X1	2023	2040	176	-32.72	miRNA: 3' acAGUCUUCCUCCGAGAg 5' **|||||:|||||||||| target: 5' gtTCAGAGGGAGGCTCTc 3'	2022	2039	-37.6	0.000914	target: 5' AGGGAGGCUCUCG 3' |:||||||||||* miRNA: 3' UUCCUCCGAGAG- 5'	no
NC_040021.1_11376	rna-XM_019266045.2	gene-LOC104934279	LOC104934279	inactive ubiquitin carboxyl-terminal hydrolase 54, transcript variant X3	516	533	172	-29.28	miRNA: 3' acAGUCUUCCUCCGAGAg 5' **||||::|||||||||: target: 5' gcTCAGGGGGAGGCTCTt 3'	517	534	-34.8	0.001775	target: 5' GGGGAGGCUCUUA 3' ::|||||||||:* miRNA: 3' UUCCUCCGAGAG- 5'	no
NC_040021.1_11376	rna-XM_019264786.2	gene-dnmbp	dnmbp	dynamin binding protein, transcript variant X1	45	62	160	-23.84	miRNA: 3' acagucUUCCUCCGAGAg 5' **|:**|||||||||||| target: 5' ctttttAAGGAGGCTCTc 3'	38	55	-28.7	0.008795	target: 5' ACCUUUUUAAGGAGGCUCUCA 3' |********|||||||||||* miRNA: 3' U--------UCCUCCGAGAG- 5'	no
NC_040021.1_11376	rna-XM_010741750.3	gene-LOC104927632	LOC104927632	vesicle transport protein GOT1B, transcript variant X1	594	613	163	-24.75	miRNA: 3' acAGUCU--UCCUCCGAGAg 5' **|||||**:|||||||||: target: 5' atTCAGACTGGGAGGCTCTt 3'	595	612	-32.1	0.009596	target: 5' ACUGGGAGGCUCUUA 3' |**:|||||||||:* miRNA: 3' U--UCCUCCGAGAG- 5'	no
NC_040021.1_11376	rna-XM_019266047.2	gene-LOC104934279	LOC104934279	inactive ubiquitin carboxyl-terminal hydrolase 54, transcript variant X3	516	533	172	-29.28	miRNA: 3' acAGUCUUCCUCCGAGAg 5' **||||::|||||||||: target: 5' gcTCAGGGGGAGGCTCTt 3'	517	534	-34.8	0.001775	target: 5' GGGGAGGCUCUUA 3' ::|||||||||:* miRNA: 3' UUCCUCCGAGAG- 5'	no
NC_040021.1_11376	rna-XM_010731310.3	gene-LOC104919321	LOC104919321	ammonium transporter Rh type A	339	358	162	-27.41	miRNA: 3' acAGUCUUC-C-UCCGAGAg 5' *||||||||*|*|||||||: target: 5' ggTCAGAAGCGTAGGCTCTt 3'	339	356	-30.8	0.001099	target: 5' AAGCGUAGGCUCUUC 3' |||*|*|||||||:* miRNA: 3' UUC-C-UCCGAGAG- 5'	no
NC_040021.1_11376	rna-XM_010751783.3	gene-rce1	rce1	Ras converting CAAX endopeptidase 1	4673	4693	163	-29.2	miRNA: 3' acAGUCU---UCCUCCGAGAg 5' |||||||***||||||||||* target: 5' tgTCAGATTTAGGAGGCTCTa 3'	4668	4685	-34.6	0.008362	target: 5' GAUUUAGGAGGCUCUA 3' ||***||||||||||* miRNA: 3' CU---UCCUCCGAGAG 5'	no
NC_040021.1_11376	rna-XM_027286476.1	gene-LOC104929035	LOC104929035	ephrin type-B receptor 5	1019	1036	166	-25.21	miRNA: 3' acagUCUUCCUCCGAGAg 5' ||**:||||||||||||* target: 5' tgaaGGAAGGAGGCTCTg 3'	1017	1034	-31.3	0.003693	target: 5' GAAGGAGGCUCUG 3' ||||||||||||* miRNA: 3' CUUCCUCCGAGAG 5'	no
NC_040021.1_11376	rna-XM_019264784.2	gene-dnmbp	dnmbp	dynamin binding protein, transcript variant X1	45	62	160	-23.84	miRNA: 3' acagucUUCCUCCGAGAg 5' **|:**|||||||||||| target: 5' ctttttAAGGAGGCTCTc 3'	38	55	-28.7	0.008795	target: 5' ACCUUUUUAAGGAGGCUCUCA 3' |********|||||||||||* miRNA: 3' U--------UCCUCCGAGAG- 5'	no
NC_040021.1_11376	rna-XM_027289528.1	gene-LOC104934279	LOC104934279	inactive ubiquitin carboxyl-terminal hydrolase 54, transcript variant X3	516	533	172	-29.28	miRNA: 3' acAGUCUUCCUCCGAGAg 5' **||||::|||||||||: target: 5' gcTCAGGGGGAGGCTCTt 3'	517	534	-34.8	0.001775	target: 5' GGGGAGGCUCUUA 3' ::|||||||||:* miRNA: 3' UUCCUCCGAGAG- 5'	no
NC_040021.1_11376	rna-XM_010742076.3	gene-dnmbp	dnmbp	dynamin binding protein, transcript variant X1	45	62	160	-23.84	miRNA: 3' acagucUUCCUCCGAGAg 5' **|:**|||||||||||| target: 5' ctttttAAGGAGGCTCTc 3'	38	55	-28.7	0.008795	target: 5' ACCUUUUUAAGGAGGCUCUCA 3' |********|||||||||||* miRNA: 3' U--------UCCUCCGAGAG- 5'	no
NC_040021.1_11376	rna-XM_027289312.1	gene-dnmbp	dnmbp	dynamin binding protein, transcript variant X1	45	62	160	-23.84	miRNA: 3' acagucUUCCUCCGAGAg 5' **|:**|||||||||||| target: 5' ctttttAAGGAGGCTCTc 3'	38	55	-28.7	0.008795	target: 5' ACCUUUUUAAGGAGGCUCUCA 3' |********|||||||||||* miRNA: 3' U--------UCCUCCGAGAG- 5'	no
NC_040021.1_11376	rna-XM_027291270.1	gene-LOC104932394	LOC104932394	interphotoreceptor matrix proteoglycan 2, transcript variant X1	2023	2040	176	-32.72	miRNA: 3' acAGUCUUCCUCCGAGAg 5' **|||||:|||||||||| target: 5' gtTCAGAGGGAGGCTCTc 3'	2022	2039	-37.6	0.000914	target: 5' AGGGAGGCUCUCG 3' |:||||||||||* miRNA: 3' UUCCUCCGAGAG- 5'	no
NC_040021.1_11376	rna-XM_019266048.2	gene-LOC104934279	LOC104934279	inactive ubiquitin carboxyl-terminal hydrolase 54, transcript variant X3	516	533	172	-29.28	miRNA: 3' acAGUCUUCCUCCGAGAg 5' **||||::|||||||||: target: 5' gcTCAGGGGGAGGCTCTt 3'	517	534	-34.8	0.001775	target: 5' GGGGAGGCUCUUA 3' ::|||||||||:* miRNA: 3' UUCCUCCGAGAG- 5'	no
NC_040021.1_11376	rna-XM_019266046.2	gene-LOC104934279	LOC104934279	inactive ubiquitin carboxyl-terminal hydrolase 54, transcript variant X3	516	533	172	-29.28	miRNA: 3' acAGUCUUCCUCCGAGAg 5' **||||::|||||||||: target: 5' gcTCAGGGGGAGGCTCTt 3'	517	534	-34.8	0.001775	target: 5' GGGGAGGCUCUUA 3' ::|||||||||:* miRNA: 3' UUCCUCCGAGAG- 5'	no
NC_040021.1_11376	rna-XM_010748883.3	gene-snf8	snf8	SNF8, ESCRT-II complex subunit	40	57	166	-28.73	miRNA: 3' acagUCUUCCUCCGAGAg 5' ||**:||||||||||||| target: 5' tgcgGGAAGGAGGCTCTc 3'	43	60	-33.8	5.9e-05	target: 5' AAGGAGGCUCUCG 3' ||||||||||||* miRNA: 3' UUCCUCCGAGAG- 5'	no
NC_040021.1_11376	rna-XM_019264785.2	gene-dnmbp	dnmbp	dynamin binding protein, transcript variant X1	45	62	160	-23.84	miRNA: 3' acagucUUCCUCCGAGAg 5' **|:**|||||||||||| target: 5' ctttttAAGGAGGCTCTc 3'	38	55	-28.7	0.008795	target: 5' ACCUUUUUAAGGAGGCUCUCA 3' |********|||||||||||* miRNA: 3' U--------UCCUCCGAGAG- 5'	no
NC_040021.1_11376	rna-XM_027289527.1	gene-LOC104934279	LOC104934279	inactive ubiquitin carboxyl-terminal hydrolase 54, transcript variant X3	516	533	172	-29.28	miRNA: 3' acAGUCUUCCUCCGAGAg 5' **||||::|||||||||: target: 5' gcTCAGGGGGAGGCTCTt 3'	517	534	-34.8	0.001775	target: 5' GGGGAGGCUCUUA 3' ::|||||||||:* miRNA: 3' UUCCUCCGAGAG- 5'	no
NC_040021.1_11376	rna-XM_027275472.1	gene-LOC113744718	LOC113744718	nebulin-like	46	62	161	-25.66	miRNA: 3' acaGUCUUCCUCCGAGAg 5' ***|||*||||||||||: target: 5' cagCAG-AGGAGGCTCTt 3'	45	62	-28.9	0.000221	target: 5' CAGAGGAGGCUCUUC 3' **:||||||||||:* miRNA: 3' --UUCCUCCGAGAG- 5'	no
NC_040023.1_14952	rna-XM_027290495.1	gene-LOC104927817	LOC104927817	hydroxylysine kinase	28	48	177	-26.6	miRNA: 3' guaGGUUUGUCUUCUCAGAGUa 5' :|*||:||||*||||||||||* target: 5' taaCCGAACA-AAGAGTCTCAc 3'	30	51	-29.4	0.002951	target: 5' AACA-AAGAGUCUCAC 3' ||||*||||||||||* miRNA: 3' UUGUCUUCUCAGAGUA 5'	no
NC_040023.1_14952	rna-XM_010748392.3	gene-pdyn	pdyn	prodynorphin	303	324	184	-30.22	miRNA: 3' guAGGUUUGUCUUCUCAGAGUa 5' **||||**|||||||||||||* target: 5' acTCCATCCAGAAGAGTCTCAg 3'	304	325	-33.9	0.000299	target: 5' UCCAGAAGAGUCUCAG 3' **|||||||||||||* miRNA: 3' UUGUCUUCUCAGAGUA 5'	no
NC_040023.1_14952	rna-XM_027291374.1	gene-LOC104928573	LOC104928573	nck-associated protein 5, transcript variant X4	929	950	184	-30.06	miRNA: 3' guAGGUUUGUCUUCUCAGAGUa 5' *|||||||||||**|||||||| target: 5' gaTCCAAACAGACTAGTCTCAt 3'	929	950	-34.3	0.00168	target: 5' AACAGACUAGUCUCAUG 3' ||||||**||||||||* miRNA: 3' UUGUCUUCUCAGAGUA- 5'	no
NC_040023.1_14952	rna-XM_027286231.1	gene-nr4a3	nr4a3	nuclear receptor subfamily 4 group A member 3, transcript variant X5	81	100	168	-26.31	miRNA: 3' guAGGUUUGUCUUCUCAGAGUa 5' ||||||:|*||*|||||||||* target: 5' caTCCAGA-AG-AGAGTCTCAc 3'	80	101	-30.7	0.000417	target: 5' AGAA--GAGAGUCUCAC 3' |:|***:|||||||||* miRNA: 3' UUUGUCUUCUCAGAGUA 5'	no
NC_040023.1_14952	rna-XM_010746856.3	gene-zzef1	zzef1	zinc finger ZZ-type and EF-hand domain containing 1, transcript variant X2	536	558	175	-28.81	miRNA: 3' guAGGU-UUGUCUUCUCAGAGUa 5' ::||||*:||||*:||||||||| target: 5' tgTCCAGGACAGCGGAGTCTCAt 3'	536	557	-32.5	0.006568	target: 5' GGACAGCGGAGUCUCAUU 3' *:||||*:|||||||||* miRNA: 3' -UUGUCUUCUCAGAGUA- 5'	no
NC_040023.1_14952	rna-XM_019255440.2	gene-zzef1	zzef1	zinc finger ZZ-type and EF-hand domain containing 1, transcript variant X2	536	558	175	-28.81	miRNA: 3' guAGGU-UUGUCUUCUCAGAGUa 5' ::||||*:||||*:||||||||| target: 5' tgTCCAGGACAGCGGAGTCTCAt 3'	536	557	-32.5	0.006568	target: 5' GGACAGCGGAGUCUCAUU 3' *:||||*:|||||||||* miRNA: 3' -UUGUCUUCUCAGAGUA- 5'	no
NC_040023.1_14952	rna-XM_027290967.1	gene-LOC104920083	LOC104920083	bromodomain adjacent to zinc finger domain protein 2B, transcript variant X5	961	981	178	-30.83	miRNA: 3' guAGGUUUGUCUUCUCAGAGUa 5' *:|||*|:||||:||||||||* target: 5' ggTCC-AGCAGAGGAGTCTCAa 3'	961	982	-35.7	0.000591	target: 5' AGCAGAGGAGUCUCAA 3' |:||||:||||||||* miRNA: 3' UUGUCUUCUCAGAGUA 5'	no
NC_040023.1_14952	rna-XM_010735998.3	gene-nr4a3	nr4a3	nuclear receptor subfamily 4 group A member 3, transcript variant X5	81	100	168	-26.31	miRNA: 3' guAGGUUUGUCUUCUCAGAGUa 5' ||||||:|*||*|||||||||* target: 5' caTCCAGA-AG-AGAGTCTCAc 3'	80	101	-30.7	0.000417	target: 5' AGAA--GAGAGUCUCAC 3' |:|***:|||||||||* miRNA: 3' UUUGUCUUCUCAGAGUA 5'	no
NC_040023.1_14952	rna-XM_019270557.2	gene-nr4a3	nr4a3	nuclear receptor subfamily 4 group A member 3, transcript variant X5	81	100	168	-26.31	miRNA: 3' guAGGUUUGUCUUCUCAGAGUa 5' ||||||:|*||*|||||||||* target: 5' caTCCAGA-AG-AGAGTCTCAc 3'	80	101	-30.7	0.000417	target: 5' AGAA--GAGAGUCUCAC 3' |:|***:|||||||||* miRNA: 3' UUUGUCUUCUCAGAGUA 5'	no
NC_040023.1_14952	rna-XM_027291379.1	gene-LOC104928573	LOC104928573	nck-associated protein 5, transcript variant X4	929	950	184	-30.06	miRNA: 3' guAGGUUUGUCUUCUCAGAGUa 5' *|||||||||||**|||||||| target: 5' gaTCCAAACAGACTAGTCTCAt 3'	929	950	-34.3	0.00168	target: 5' AACAGACUAGUCUCAUG 3' ||||||**||||||||* miRNA: 3' UUGUCUUCUCAGAGUA- 5'	no
NC_040023.1_14952	rna-XM_019255255.2	gene-LOC104920083	LOC104920083	bromodomain adjacent to zinc finger domain protein 2B, transcript variant X5	961	981	178	-30.83	miRNA: 3' guAGGUUUGUCUUCUCAGAGUa 5' *:|||*|:||||:||||||||* target: 5' ggTCC-AGCAGAGGAGTCTCAa 3'	961	982	-35.7	0.000591	target: 5' AGCAGAGGAGUCUCAA 3' |:||||:||||||||* miRNA: 3' UUGUCUUCUCAGAGUA 5'	no
NC_040023.1_14952	rna-XM_019255250.2	gene-LOC104920083	LOC104920083	bromodomain adjacent to zinc finger domain protein 2B, transcript variant X5	961	981	178	-30.83	miRNA: 3' guAGGUUUGUCUUCUCAGAGUa 5' *:|||*|:||||:||||||||* target: 5' ggTCC-AGCAGAGGAGTCTCAa 3'	961	982	-35.7	0.000591	target: 5' AGCAGAGGAGUCUCAA 3' |:||||:||||||||* miRNA: 3' UUGUCUUCUCAGAGUA 5'	no
NC_040023.1_14952	rna-XM_027290017.1	gene-LOC109140116	LOC109140116	CD48 antigen-like, transcript variant X2	506	527	180	-26.04	miRNA: 3' guAGGUUUGUCUUCUCAGAGUa 5' **|*::|:|||||||||||||* target: 5' atTGTGAGCAGAAGAGTCTCAa 3'	507	528	-31.7	0.00239	target: 5' AGCAGAAGAGUCUCAA 3' |:|||||||||||||* miRNA: 3' UUGUCUUCUCAGAGUA 5'	no
NC_040023.1_14952	rna-XM_027291377.1	gene-LOC104928573	LOC104928573	nck-associated protein 5, transcript variant X4	929	950	184	-30.06	miRNA: 3' guAGGUUUGUCUUCUCAGAGUa 5' *|||||||||||**|||||||| target: 5' gaTCCAAACAGACTAGTCTCAt 3'	929	950	-34.3	0.00168	target: 5' AACAGACUAGUCUCAUG 3' ||||||**||||||||* miRNA: 3' UUGUCUUCUCAGAGUA- 5'	no
NC_040023.1_14952	rna-XM_019279238.2	gene-LOC104933511	LOC104933511	3-keto-steroid reductase, transcript variant X1	118	140	165	-23	miRNA: 3' guagGUUUGUC-UUCUCAGAGUa 5' :***:||*|||*|:||||||||| target: 5' tcagTAACCAGCAGGAGTCTCAt 3'	116	137	-25.3	0.00706	target: 5' UAACCAGCAGGAGUCUCAUC 3' *||*|||*|:|||||||||* miRNA: 3' -UU-GUC-UUCUCAGAGUA- 5'	no
NC_040023.1_14952	rna-XM_027282670.1	gene-LOC104939388	LOC104939388	NACHT, LRR and PYD domains-containing protein 12, transcript variant X7	199	221	168	-21.26	miRNA: 3' guaggUUUGUCUU-CUCAGAGUa 5' :****||||||||**|||||||| target: 5' tcaaaAAACAGAACAAGTCTCAt 3'	197	218	-26	0.004912	target: 5' AAAACAGAACAAGUCUCAU 3' *||||||||**|||||||| miRNA: 3' -UUUGUCUUC-UCAGAGUA 5'	no
NC_040023.1_14952	rna-XM_019255256.2	gene-LOC104920083	LOC104920083	bromodomain adjacent to zinc finger domain protein 2B, transcript variant X5	961	981	178	-30.83	miRNA: 3' guAGGUUUGUCUUCUCAGAGUa 5' *:|||*|:||||:||||||||* target: 5' ggTCC-AGCAGAGGAGTCTCAa 3'	961	982	-35.7	0.000591	target: 5' AGCAGAGGAGUCUCAA 3' |:||||:||||||||* miRNA: 3' UUGUCUUCUCAGAGUA 5'	no
NC_040023.1_14952	rna-XM_010752327.3	gene-grhl2	grhl2	grainyhead like transcription factor 2, transcript variant X1	110	131	167	-25.85	miRNA: 3' guagguuUGUCUUCUCAGAGUa 5' *|*****||||::||||||||* target: 5' gaaaaccACAGGGGAGTCTCAg 3'	114	135	-29.8	0.008916	target: 5' -ACAGGGGAGUCUCAG 3' *||||::||||||||* miRNA: 3' UUGUCUUCUCAGAGUA 5'	no
NC_040023.1_14952	rna-XM_019255249.2	gene-LOC104920083	LOC104920083	bromodomain adjacent to zinc finger domain protein 2B, transcript variant X5	961	981	178	-30.83	miRNA: 3' guAGGUUUGUCUUCUCAGAGUa 5' *:|||*|:||||:||||||||* target: 5' ggTCC-AGCAGAGGAGTCTCAa 3'	961	982	-35.7	0.000591	target: 5' AGCAGAGGAGUCUCAA 3' |:||||:||||||||* miRNA: 3' UUGUCUUCUCAGAGUA 5'	no
NC_040023.1_14952	rna-XM_019255253.2	gene-LOC104920083	LOC104920083	bromodomain adjacent to zinc finger domain protein 2B, transcript variant X5	961	981	178	-30.83	miRNA: 3' guAGGUUUGUCUUCUCAGAGUa 5' *:|||*|:||||:||||||||* target: 5' ggTCC-AGCAGAGGAGTCTCAa 3'	961	982	-35.7	0.000591	target: 5' AGCAGAGGAGUCUCAA 3' |:||||:||||||||* miRNA: 3' UUGUCUUCUCAGAGUA 5'	no
NC_040023.1_14952	rna-XM_019255252.2	gene-LOC104920083	LOC104920083	bromodomain adjacent to zinc finger domain protein 2B, transcript variant X5	961	981	178	-30.83	miRNA: 3' guAGGUUUGUCUUCUCAGAGUa 5' *:|||*|:||||:||||||||* target: 5' ggTCC-AGCAGAGGAGTCTCAa 3'	961	982	-35.7	0.000591	target: 5' AGCAGAGGAGUCUCAA 3' |:||||:||||||||* miRNA: 3' UUGUCUUCUCAGAGUA 5'	no
NC_040023.1_14952	rna-XM_027291375.1	gene-LOC104928573	LOC104928573	nck-associated protein 5, transcript variant X4	929	950	184	-30.06	miRNA: 3' guAGGUUUGUCUUCUCAGAGUa 5' *|||||||||||**|||||||| target: 5' gaTCCAAACAGACTAGTCTCAt 3'	929	950	-34.3	0.00168	target: 5' AACAGACUAGUCUCAUG 3' ||||||**||||||||* miRNA: 3' UUGUCUUCUCAGAGUA- 5'	no
NC_040023.1_14952	rna-XM_027291378.1	gene-LOC104928573	LOC104928573	nck-associated protein 5, transcript variant X4	929	950	184	-30.06	miRNA: 3' guAGGUUUGUCUUCUCAGAGUa 5' *|||||||||||**|||||||| target: 5' gaTCCAAACAGACTAGTCTCAt 3'	929	950	-34.3	0.00168	target: 5' AACAGACUAGUCUCAUG 3' ||||||**||||||||* miRNA: 3' UUGUCUUCUCAGAGUA- 5'	no
NC_040023.1_14952	rna-XM_019265887.2	gene-LOC109140116	LOC109140116	CD48 antigen-like, transcript variant X2	127	148	180	-26.04	miRNA: 3' guAGGUUUGUCUUCUCAGAGUa 5' **|*::|:|||||||||||||* target: 5' atTGTGAGCAGAAGAGTCTCAa 3'	128	149	-31.7	0.000924	target: 5' AGCAGAAGAGUCUCAA 3' |:|||||||||||||* miRNA: 3' UUGUCUUCUCAGAGUA 5'	no
NC_040023.1_14952	rna-XM_019254183.2	gene-snx11	snx11	sorting nexin 11	813	834	184	-26.71	miRNA: 3' guAGGUUUGUCUUCUCAGAGUa 5' **|:|||||||:*||||||||* target: 5' atTTCAAACAGGTGAGTCTCAc 3'	814	835	-30.9	0.006633	target: 5' AACAGGUGAGUCUCAC 3' |||||:*||||||||* miRNA: 3' UUGUCUUCUCAGAGUA 5'	no
NC_040023.1_14952	rna-XM_010744982.3	gene-LOC104930245	LOC104930245	nuclear factor interleukin-3-regulated protein	262	282	169	-27.17	miRNA: 3' guaGGUUUGUCUUCUCAGAGUa 5' ::*:||:||||*:||||||||| target: 5' tgcTCAGACAG-GGAGTCTCAt 3'	264	285	-29.5	0.006398	target: 5' GACAG-GGAGUCUCAUC 3' :||||*:|||||||||* miRNA: 3' UUGUCUUCUCAGAGUA- 5'	no
NC_040023.1_14952	rna-XM_019255254.2	gene-LOC104920083	LOC104920083	bromodomain adjacent to zinc finger domain protein 2B, transcript variant X5	961	981	178	-30.83	miRNA: 3' guAGGUUUGUCUUCUCAGAGUa 5' *:|||*|:||||:||||||||* target: 5' ggTCC-AGCAGAGGAGTCTCAa 3'	961	982	-35.7	0.000591	target: 5' AGCAGAGGAGUCUCAA 3' |:||||:||||||||* miRNA: 3' UUGUCUUCUCAGAGUA 5'	no
NC_040023.1_14952	rna-XM_027286230.1	gene-nr4a3	nr4a3	nuclear receptor subfamily 4 group A member 3, transcript variant X5	81	100	168	-26.31	miRNA: 3' guAGGUUUGUCUUCUCAGAGUa 5' ||||||:|*||*|||||||||* target: 5' caTCCAGA-AG-AGAGTCTCAc 3'	80	101	-30.7	0.000417	target: 5' AGAA--GAGAGUCUCAC 3' |:|***:|||||||||* miRNA: 3' UUUGUCUUCUCAGAGUA 5'	no
NC_040023.1_14952	rna-XM_019255251.2	gene-LOC104920083	LOC104920083	bromodomain adjacent to zinc finger domain protein 2B, transcript variant X5	961	981	178	-30.83	miRNA: 3' guAGGUUUGUCUUCUCAGAGUa 5' *:|||*|:||||:||||||||* target: 5' ggTCC-AGCAGAGGAGTCTCAa 3'	961	982	-35.7	0.000591	target: 5' AGCAGAGGAGUCUCAA 3' |:||||:||||||||* miRNA: 3' UUGUCUUCUCAGAGUA 5'	no
NC_040023.1_14952	rna-XM_027291376.1	gene-LOC104928573	LOC104928573	nck-associated protein 5, transcript variant X4	929	950	184	-30.06	miRNA: 3' guAGGUUUGUCUUCUCAGAGUa 5' *|||||||||||**|||||||| target: 5' gaTCCAAACAGACTAGTCTCAt 3'	929	950	-34.3	0.00168	target: 5' AACAGACUAGUCUCAUG 3' ||||||**||||||||* miRNA: 3' UUGUCUUCUCAGAGUA- 5'	no
NC_040023.1_14952	rna-XM_027286232.1	gene-nr4a3	nr4a3	nuclear receptor subfamily 4 group A member 3, transcript variant X5	81	100	168	-26.31	miRNA: 3' guAGGUUUGUCUUCUCAGAGUa 5' ||||||:|*||*|||||||||* target: 5' caTCCAGA-AG-AGAGTCTCAc 3'	80	101	-30.7	0.000417	target: 5' AGAA--GAGAGUCUCAC 3' |:|***:|||||||||* miRNA: 3' UUUGUCUUCUCAGAGUA 5'	no
NC_040023.1_14952	rna-XM_010752319.3	gene-grhl2	grhl2	grainyhead like transcription factor 2, transcript variant X1	110	131	167	-25.85	miRNA: 3' guagguuUGUCUUCUCAGAGUa 5' *|*****||||::||||||||* target: 5' gaaaaccACAGGGGAGTCTCAg 3'	114	135	-29.8	0.008916	target: 5' -ACAGGGGAGUCUCAG 3' *||||::||||||||* miRNA: 3' UUGUCUUCUCAGAGUA 5'	no
NC_040023.1_14952	rna-XM_027290965.1	gene-LOC104920083	LOC104920083	bromodomain adjacent to zinc finger domain protein 2B, transcript variant X5	961	981	178	-30.83	miRNA: 3' guAGGUUUGUCUUCUCAGAGUa 5' *:|||*|:||||:||||||||* target: 5' ggTCC-AGCAGAGGAGTCTCAa 3'	961	982	-35.7	0.000591	target: 5' AGCAGAGGAGUCUCAA 3' |:||||:||||||||* miRNA: 3' UUGUCUUCUCAGAGUA 5'	no
NC_040023.1_14952	rna-XM_010735996.3	gene-nr4a3	nr4a3	nuclear receptor subfamily 4 group A member 3, transcript variant X5	81	100	168	-26.31	miRNA: 3' guAGGUUUGUCUUCUCAGAGUa 5' ||||||:|*||*|||||||||* target: 5' caTCCAGA-AG-AGAGTCTCAc 3'	80	101	-30.7	0.000417	target: 5' AGAA--GAGAGUCUCAC 3' |:|***:|||||||||* miRNA: 3' UUUGUCUUCUCAGAGUA 5'	no
NC_040023.1_14952	rna-XM_010751720.3	gene-slc9a8	slc9a8	solute carrier family 9 member A8	167	188	160	-22.77	miRNA: 3' guagguUUGUCUUCUCAGAGUa 5' :**:**:||||||||||:|||* target: 5' ttatgtGACAGAAGAGTTTCAg 3'	159	180	-31	0.004737	target: 5' ACUUUAUGUGACAGAAGAGUUUCAG 3' *********:||||||||||:|||* miRNA: 3' ---------UUGUCUUCUCAGAGUA 5'	no
NC_040023.1_14952	rna-XM_010735997.3	gene-nr4a3	nr4a3	nuclear receptor subfamily 4 group A member 3, transcript variant X5	81	100	168	-26.31	miRNA: 3' guAGGUUUGUCUUCUCAGAGUa 5' ||||||:|*||*|||||||||* target: 5' caTCCAGA-AG-AGAGTCTCAc 3'	80	101	-30.7	0.000417	target: 5' AGAA--GAGAGUCUCAC 3' |:|***:|||||||||* miRNA: 3' UUUGUCUUCUCAGAGUA 5'	no
NC_040023.1_14952	rna-XM_027291373.1	gene-LOC104928573	LOC104928573	nck-associated protein 5, transcript variant X4	929	950	184	-30.06	miRNA: 3' guAGGUUUGUCUUCUCAGAGUa 5' *|||||||||||**|||||||| target: 5' gaTCCAAACAGACTAGTCTCAt 3'	929	950	-34.3	0.00168	target: 5' AACAGACUAGUCUCAUG 3' ||||||**||||||||* miRNA: 3' UUGUCUUCUCAGAGUA- 5'	no
NC_040033.1_25011	rna-XM_019270323.2	gene-patl2	patl2	PAT1 homolog 2	443	470	166	-25.4	miRNA: 3' uuUCCA-GGUGAAUG-----AUUACAAa 5' *:||||*||||||||*****|||||||| target: 5' tgAGGTACCACTTACTGAGATAATGTTt 3'	443	464	-28.8	0.008849	target: 5' ACCACUUACUGAGAUAAUGUUUG 3' *|||||||||*****|||||||* miRNA: 3' -GGUGAAUGA-----UUACAAA- 5'	no
NC_040033.1_25298	rna-XM_019270323.2	gene-patl2	patl2	PAT1 homolog 2	443	470	166	-25.4	miRNA: 3' uuUCCA-GGUGAAUG-----AUUACAAa 5' *:||||*||||||||*****|||||||| target: 5' tgAGGTACCACTTACTGAGATAATGTTt 3'	443	464	-28.8	0.008849	target: 5' ACCACUUACUGAGAUAAUGUUUG 3' *|||||||||*****|||||||* miRNA: 3' -GGUGAAUGA-----UUACAAA- 5'	no
NW_020852144.1_27084	rna-XM_027276299.1	gene-LOC104931902	LOC104931902	sodium channel protein type 4 subunit alpha B, transcript variant X3	300	322	163	-27.84	miRNA: 3' ggCGAUGGA-GAGCGUACGAUUc 5' ::|:||:||*:|||||||||:|* target: 5' ttGTTATCTGTTCGCATGCTGAt 3'	300	321	-31.9	0.000662	target: 5' UCUGUUCGCAUGCUGAU 3' :||*:|||||||||:|* miRNA: 3' GGA-GAGCGUACGAUUC 5'	no
NW_020852144.1_27084	rna-XM_027273485.1	gene-LOC104926333	LOC104926333	ribosomal protein S6 kinase alpha-4, transcript variant X1	1549	1570	181	-28.08	miRNA: 3' ggcgaUGGAGAGCGUACGAUUc 5' :****|:||||||||||||||* target: 5' tgaaaATCTCTCGCATGCTAAt 3'	1541	1562	-33.9	0.004111	target: 5' CUGAAAAUCUCUCGCAUGCUAAU 3' ******|:||||||||||||||* miRNA: 3' ------UGGAGAGCGUACGAUUC 5'	no
NW_020852144.1_27084	rna-XM_027274402.1	gene-myrip	myrip	myosin VIIA and Rab interacting protein, transcript variant X4	48	66	164	-21.89	miRNA: 3' ggCGAUGGAGAGCGUACGAUUc 5' **|||:|||||***|||||||* target: 5' aaGCTGCCTCT---ATGCTAAc 3'	49	70	-29.1	0.006207	target: 5' CCUCU---AUGCUAAC 3' |||||***|||||||* miRNA: 3' GGAGAGCGUACGAUUC 5'	no
NW_020852144.1_27084	rna-XM_027275509.1	gene-vsx1	vsx1	visual system homeobox 1, transcript variant X2	123	145	171	-28.18	miRNA: 3' ggCGAUGGA-GAGCGUACGAUUc 5' *:|||||*|*:|*|||||||||| target: 5' atGCTACGTGTTAGCATGCTAAg 3'	123	144	-31.4	0.00165	target: 5' CGUGUUAGCAUGCUAAGA 3' |*|*|:*||||||||||* miRNA: 3' GGAGAG-CGUACGAUUC- 5'	no
NW_020852144.1_27084	rna-XM_027276300.1	gene-LOC104931902	LOC104931902	sodium channel protein type 4 subunit alpha B, transcript variant X3	300	322	163	-27.84	miRNA: 3' ggCGAUGGA-GAGCGUACGAUUc 5' ::|:||:||*:|||||||||:|* target: 5' ttGTTATCTGTTCGCATGCTGAt 3'	300	321	-31.9	0.000662	target: 5' UCUGUUCGCAUGCUGAU 3' :||*:|||||||||:|* miRNA: 3' GGA-GAGCGUACGAUUC 5'	no
NW_020852144.1_27084	rna-XM_019275373.2	gene-inpp5d	inpp5d	inositol polyphosphate-5-phosphatase D	154	180	162	-24.71	miRNA: 3' ggCGAUG-GAG----AGCGUACGAUUc 5' *:|||||*|||****|:|:|||||||* target: 5' atGCTACTCTCATGTTTGTATGCTAAa 3'	154	175	-29.9	0.009188	target: 5' CUCUCAUGUUUGUAUGCUAAA 3' |*|||****|:|:|||||||* miRNA: 3' G-GAG----AGCGUACGAUUC 5'	no
NW_020852144.1_27084	rna-XM_027276301.1	gene-LOC104931902	LOC104931902	sodium channel protein type 4 subunit alpha B, transcript variant X3	300	322	163	-27.84	miRNA: 3' ggCGAUGGA-GAGCGUACGAUUc 5' ::|:||:||*:|||||||||:|* target: 5' ttGTTATCTGTTCGCATGCTGAt 3'	300	321	-31.9	0.000662	target: 5' UCUGUUCGCAUGCUGAU 3' :||*:|||||||||:|* miRNA: 3' GGA-GAGCGUACGAUUC 5'	no
NW_020852144.1_27084	rna-XM_019267868.2	gene-gtf3c1	gtf3c1	general transcription factor IIIC subunit 1, transcript variant X2	214	235	160	-24.49	miRNA: 3' ggCGAUGGAGAGCGUACGAUUc 5' *:|:|:|:|:|:|:|||:|||* target: 5' gtGTTGCTTTTTGTATGTTAAc 3'	214	235	-28.9	0.001264	target: 5' CUUUUUGUAUGUUAAC 3' |:|:|:|:|||:|||* miRNA: 3' GGAGAGCGUACGAUUC 5'	no
NW_020852144.1_27084	rna-XM_019259563.2	gene-LOC104926333	LOC104926333	ribosomal protein S6 kinase alpha-4, transcript variant X1	1549	1570	181	-28.08	miRNA: 3' ggcgaUGGAGAGCGUACGAUUc 5' :****|:||||||||||||||* target: 5' tgaaaATCTCTCGCATGCTAAt 3'	1541	1562	-33.9	0.003805	target: 5' CUGAAAAUCUCUCGCAUGCUAAU 3' ******|:||||||||||||||* miRNA: 3' ------UGGAGAGCGUACGAUUC 5'	no
NW_020852144.1_27084	rna-XM_027276298.1	gene-LOC104931902	LOC104931902	sodium channel protein type 4 subunit alpha B, transcript variant X3	300	322	163	-27.84	miRNA: 3' ggCGAUGGA-GAGCGUACGAUUc 5' ::|:||:||*:|||||||||:|* target: 5' ttGTTATCTGTTCGCATGCTGAt 3'	300	321	-31.9	0.000662	target: 5' UCUGUUCGCAUGCUGAU 3' :||*:|||||||||:|* miRNA: 3' GGA-GAGCGUACGAUUC 5'	no
NW_020852144.1_27084	rna-XM_027286517.1	gene-znf407	znf407	zinc finger protein 407, transcript variant X1	199	226	161	-24.53	miRNA: 3' ggCGAU-GGAGAG----CG-UACGAUUc 5' ::||||*||||||****||*|||||||* target: 5' ttGCTATCCTCTCTTGGGCTATGCTAAa 3'	199	220	-29.8	0.009891	target: 5' UCCUCUCUUGGGCUAUGCUAAA 3' *||||||****||*|||||||* miRNA: 3' -GGAGAG----CG-UACGAUUC 5'	no
NW_020852144.1_27084	rna-XM_027275508.1	gene-vsx1	vsx1	visual system homeobox 1, transcript variant X2	123	145	171	-28.18	miRNA: 3' ggCGAUGGA-GAGCGUACGAUUc 5' *:|||||*|*:|*|||||||||| target: 5' atGCTACGTGTTAGCATGCTAAg 3'	123	144	-31.4	0.00165	target: 5' CGUGUUAGCAUGCUAAGA 3' |*|*|:*||||||||||* miRNA: 3' GGAGAG-CGUACGAUUC- 5'	no
NW_020852144.1_27084	rna-XM_027283405.1	gene-gtf3c1	gtf3c1	general transcription factor IIIC subunit 1, transcript variant X2	214	235	160	-24.49	miRNA: 3' ggCGAUGGAGAGCGUACGAUUc 5' *:|:|:|:|:|:|:|||:|||* target: 5' gtGTTGCTTTTTGTATGTTAAc 3'	214	235	-28.9	0.001264	target: 5' CUUUUUGUAUGUUAAC 3' |:|:|:|:|||:|||* miRNA: 3' GGAGAGCGUACGAUUC 5'	no
NW_020852144.1_27084	rna-XM_010744847.3	gene-LOC104930134	LOC104930134	corticotropin-releasing factor-binding protein	990	1013	167	-24.51	miRNA: 3' ggCGAUGG--AGAGCGUACGAUUc 5' *:||||||***:|*|||||||||* target: 5' atGCTACCAGGTTAGCATGCTAAc 3'	990	1011	-30.7	0.008077	target: 5' CCAGUUAGCAUGCUAAC 3' ||**|:*|||||||||* miRNA: 3' GGAGAG-CGUACGAUUC 5'	no
NW_020853301.1_27425	rna-XM_027289733.1	gene-LOC104922252	LOC104922252	DNA-binding death effector domain-containing protein 2, transcript variant X4	813	836	167	-25.62	miRNA: 3' caGUGCUUGCCG--AGAUGAGUGg 5' *||||*:||*||**|||||||||| target: 5' ctCACAGACAGCTGTCTACTCACc 3'	813	834	-31.6	0.003992	target: 5' GACAGCUGUCUACUCACCC 3' :||*||**||||||||||* miRNA: 3' UUGCCG--AGAUGAGUGG- 5'	no
NW_020853301.1_27425	rna-XM_019261273.2	gene-LOC104922252	LOC104922252	DNA-binding death effector domain-containing protein 2, transcript variant X4	1057	1080	167	-25.62	miRNA: 3' caGUGCUUGCCG--AGAUGAGUGg 5' *||||*:||*||**|||||||||| target: 5' ctCACAGACAGCTGTCTACTCACc 3'	1056	1077	-31.6	0.005266	target: 5' GACAGCUGUCUACUCACCC 3' :||*||**||||||||||* miRNA: 3' UUGCCG--AGAUGAGUGG- 5'	no
NW_020853301.1_27425	rna-XM_019271125.2	gene-LOC104927089	LOC104927089	kinesin-like protein KIF26B, transcript variant X5	166	188	163	-21.66	miRNA: 3' caGUGCUUGCCGA-GAUGAGUGg 5' **:||*||*||||**|||||||: target: 5' cgTACAAAGGGCTGATACTCACt 3'	161	182	-31.4	0.005068	target: 5' GUACAAAGGGCUGAUACUCACUA 3' |****||*||||**|||||||:* miRNA: 3' C----UUGCCGAG-AUGAGUGG- 5'	no
NW_020853301.1_27425	rna-XM_010733848.3	gene-LOC104921345	LOC104921345	dihydrolipoyllysine-residue succinyltransferase component of 2-oxoglutarate dehydrogenase complex, mitochondrial	39	63	167	-28.81	miRNA: 3' caGUGCUUG---CCGAGAUGAGUGg 5' **|||*|||***||||*|||||||| target: 5' taCACAAACAGTGGCTGTACTCACc 3'	40	61	-30.7	0.001897	target: 5' AACAGUGGCUGUACUCACCU 3' |||***||||*||||||||* miRNA: 3' UUG---CCGAGAUGAGUGG- 5'	no
NW_020853301.1_27425	rna-XM_019271121.2	gene-LOC104927089	LOC104927089	kinesin-like protein KIF26B, transcript variant X5	166	188	163	-21.66	miRNA: 3' caGUGCUUGCCGA-GAUGAGUGg 5' **:||*||*||||**|||||||: target: 5' cgTACAAAGGGCTGATACTCACt 3'	161	182	-31.4	0.005068	target: 5' GUACAAAGGGCUGAUACUCACUA 3' |****||*||||**|||||||:* miRNA: 3' C----UUGCCGAG-AUGAGUGG- 5'	no
NW_020853301.1_27425	rna-XM_010742328.3	gene-LOC104928105	LOC104928105	catenin beta-1	153	174	175	-28.82	miRNA: 3' cagUGCUUGCCGAGAUGAGUGg 5' |**:|||:|||*|:|||||||: target: 5' gagGCGAGCGGATTTACTCACt 3'	155	176	-33.1	0.001337	target: 5' AGCGGAUUUACUCACUG 3' |:|||*|:|||||||:* miRNA: 3' UUGCCGAGAUGAGUGG- 5'	no
NW_020853301.1_27425	rna-XM_019269762.2	gene-LOC104929322	LOC104929322	voltage-dependent T-type calcium channel subunit alpha-1I, transcript variant X2	316	337	164	-29.59	miRNA: 3' caGUGCUUGCCGAGAUGAGUGg 5' |*||:|:|*||:|||:|||||* target: 5' gcCATGGAAGGTTCTGCTCACa 3'	317	338	-32.9	0.0067	target: 5' GAAGGUUCUGCUCACA 3' :|*||:|||:|||||* miRNA: 3' UUGCCGAGAUGAGUGG 5'	no
NW_020853301.1_27425	rna-XM_027272215.1	gene-LOC104932584	LOC104932584	zinc finger protein 835-like	63	87	162	-24.79	miRNA: 3' caGUGCU-UGCCGA--GAUGAGUGg 5' *||||||*:|*|||**:|||||||* target: 5' atCACGATGCAGCTGATTACTCACa 3'	63	84	-29.3	0.009735	target: 5' AUGCAGCUGAUUACUCACA 3' |*:|*|||**:|||||||* miRNA: 3' U-UGCCGA--GAUGAGUGG 5'	no
NW_020853301.1_27425	rna-XM_027279851.1	gene-LOC113745935	LOC113745935	nuclear factor 7, ovary-like, transcript variant X1	1116	1137	161	-23.46	miRNA: 3' cagugcuugCCGAGAUGAGUGg 5' ***||****||||:|||||||* target: 5' aggactttgGGCTTTACTCACa 3'	1105	1126	-30.4	0.009918	target: 5' UAUAAGGACUUUGGGCUUUACUCACA 3' *****|:||****||||:|||||||* miRNA: 3' -----CUUG----CCGAGAUGAGUGG 5'	no
NW_020853301.1_27425	rna-XM_019253164.2	gene-LOC104925370	LOC104925370	neurexin-2-like, transcript variant X4	576	595	161	-28.14	miRNA: 3' caGUGCUUGCCGAGAUGAGUGg 5' ||:|||**:||:|:|||||||: target: 5' gtTACG--TGGTTTTACTCACt 3'	575	596	-30.5	0.005026	target: 5' G--UGGUUUUACUCACUC 3' |**:||:|:|||||||:* miRNA: 3' CUUGCCGAGAUGAGUGG- 5'	no
NW_020853301.1_27425	rna-XM_019255687.2	gene-LOC104919003	LOC104919003	UDP-glucuronosyltransferase 2A2, transcript variant X2	98	120	165	-24.55	miRNA: 3' caguGCUUGC-CGAGAUGAGUGg 5' *|:*:|:|||*|*|||||||||: target: 5' ctttTGGACGAGATCTACTCACt 3'	96	117	-28.3	0.005204	target: 5' UGGACGAGAUCUACUCACUA 3' :|:|||*|*|||||||||:* miRNA: 3' GCUUGC-CGAGAUGAGUGG- 5'	no
NW_020853301.1_27425	rna-XM_027279854.1	gene-LOC113745935	LOC113745935	nuclear factor 7, ovary-like, transcript variant X1	1116	1137	161	-23.46	miRNA: 3' cagugcuugCCGAGAUGAGUGg 5' ***||****||||:|||||||* target: 5' aggactttgGGCTTTACTCACa 3'	1105	1126	-30.4	0.009918	target: 5' UAUAAGGACUUUGGGCUUUACUCACA 3' *****|:||****||||:|||||||* miRNA: 3' -----CUUG----CCGAGAUGAGUGG 5'	no
NW_020853301.1_27425	rna-XM_019269761.2	gene-LOC104929322	LOC104929322	voltage-dependent T-type calcium channel subunit alpha-1I, transcript variant X2	316	337	164	-29.59	miRNA: 3' caGUGCUUGCCGAGAUGAGUGg 5' |*||:|:|*||:|||:|||||* target: 5' gcCATGGAAGGTTCTGCTCACa 3'	317	338	-32.9	0.0067	target: 5' GAAGGUUCUGCUCACA 3' :|*||:|||:|||||* miRNA: 3' UUGCCGAGAUGAGUGG 5'	no
NW_020853301.1_27425	rna-XM_010754192.3	gene-LOC104937879	LOC104937879	sarcoplasmic/endoplasmic reticulum calcium ATPase 2-like	2639	2660	164	-30.92	miRNA: 3' caGUGCUUGCCGAGAUGAGUGg 5' |||||*|||*|:|||:|||||| target: 5' gtCACAAACTGTTCTGCTCACc 3'	2636	2657	-35.3	0.002795	target: 5' AAACUGUUCUGCUCACCU 3' *|||*|:|||:||||||* miRNA: 3' CUUGCCGAGAUGAGUGG- 5'	no
NW_020853301.1_27425	rna-XM_019258196.2	gene-LOC104938148	LOC104938148	TERF1-interacting nuclear factor 2	453	474	163	-30.59	miRNA: 3' cagUGCUUGCCGAGAUGAGUGg 5' ***||*:|:||||||||||:|: target: 5' caaACCGATGGCTCTACTCGCt 3'	455	476	-33.6	0.000551	target: 5' GAUGGCUCUACUCGCUC 3' :|:||||||||||:|:* miRNA: 3' UUGCCGAGAUGAGUGG- 5'	no
NW_020853301.1_27425	rna-XM_027289732.1	gene-LOC104922252	LOC104922252	DNA-binding death effector domain-containing protein 2, transcript variant X4	813	836	167	-25.62	miRNA: 3' caGUGCUUGCCG--AGAUGAGUGg 5' *||||*:||*||**|||||||||| target: 5' ctCACAGACAGCTGTCTACTCACc 3'	813	834	-31.6	0.003992	target: 5' GACAGCUGUCUACUCACCC 3' :||*||**||||||||||* miRNA: 3' UUGCCG--AGAUGAGUGG- 5'	no
NW_020853301.1_27425	rna-XM_027279853.1	gene-LOC113745935	LOC113745935	nuclear factor 7, ovary-like, transcript variant X1	1116	1137	161	-23.46	miRNA: 3' cagugcuugCCGAGAUGAGUGg 5' ***||****||||:|||||||* target: 5' aggactttgGGCTTTACTCACa 3'	1105	1126	-30.4	0.009918	target: 5' UAUAAGGACUUUGGGCUUUACUCACA 3' *****|:||****||||:|||||||* miRNA: 3' -----CUUG----CCGAGAUGAGUGG 5'	no
NW_020853301.1_27425	rna-XM_010735036.3	gene-LOC104922252	LOC104922252	DNA-binding death effector domain-containing protein 2, transcript variant X4	1057	1080	167	-25.62	miRNA: 3' caGUGCUUGCCG--AGAUGAGUGg 5' *||||*:||*||**|||||||||| target: 5' ctCACAGACAGCTGTCTACTCACc 3'	1056	1077	-31.6	0.005266	target: 5' GACAGCUGUCUACUCACCC 3' :||*||**||||||||||* miRNA: 3' UUGCCG--AGAUGAGUGG- 5'	no
NW_020853301.1_27425	rna-XM_027279852.1	gene-LOC113745935	LOC113745935	nuclear factor 7, ovary-like, transcript variant X1	1116	1137	161	-23.46	miRNA: 3' cagugcuugCCGAGAUGAGUGg 5' ***||****||||:|||||||* target: 5' aggactttgGGCTTTACTCACa 3'	1105	1126	-30.4	0.009918	target: 5' UAUAAGGACUUUGGGCUUUACUCACA 3' *****|:||****||||:|||||||* miRNA: 3' -----CUUG----CCGAGAUGAGUGG 5'	no
NW_020853301.1_27425	rna-XM_027282223.1	gene-LOC104924489	LOC104924489	prostaglandin G/H synthase 1	102	122	166	-25.18	miRNA: 3' caGUGCUUGCCGAGAUGAGUGg 5' |*||*|:|:||:*||||||||* target: 5' gcCA-GGATGGTACTACTCACa 3'	105	126	-28.3	0.00489	target: 5' GAUGGUACUACUCACA 3' :|:||:*||||||||* miRNA: 3' UUGCCGAGAUGAGUGG 5'	no
NW_020853301.1_27425	rna-XM_019271122.2	gene-LOC104927089	LOC104927089	kinesin-like protein KIF26B, transcript variant X5	166	188	163	-21.66	miRNA: 3' caGUGCUUGCCGA-GAUGAGUGg 5' **:||*||*||||**|||||||: target: 5' cgTACAAAGGGCTGATACTCACt 3'	161	182	-31.4	0.005068	target: 5' GUACAAAGGGCUGAUACUCACUA 3' |****||*||||**|||||||:* miRNA: 3' C----UUGCCGAG-AUGAGUGG- 5'	no
NW_020853301.1_27425	rna-XM_027278257.1	gene-LOC104922972	LOC104922972	glycerol-3-phosphate acyltransferase 3-like, transcript variant X1	311	332	172	-25.79	miRNA: 3' caGUGCUUGCCGAGAUGAGUGg 5' *|:|:|||:|**|||||||||* target: 5' ttTATGAATGTATCTACTCACa 3'	311	332	-31.9	0.000698	target: 5' AAUGUAUCUACUCACA 3' ||:|**|||||||||* miRNA: 3' UUGCCGAGAUGAGUGG 5'	no
NW_020853301.1_27425	rna-XM_019268606.2	gene-ddx49	ddx49	DEAD-box helicase 49	537	558	160	-23.92	miRNA: 3' caGUGC--UUGCCGAGAUGAGUGg 5' **||:|**||||**|||||||||* target: 5' aaCATGGCAACG--TCTACTCACa 3'	532	553	-29	0.006222	target: 5' ACAUGGCAACGUCUACUCACA 3' **|:|||****|||||||||* miRNA: 3' CUUGCCG----AGAUGAGUGG 5'	no
NW_020855150.1_28212	rna-XM_027278540.1	gene-anapc1	anapc1	anaphase promoting complex subunit 1	108	128	162	-25.61	miRNA: 3' ucccaCCAUAC-CGGCAUUCg 5' **|**|||:||*||||||||: target: 5' ctgcaGGTGTGTGCCGTAAGt 3'	112	131	-30.2	0.003504	target: 5' GUGUGUGCCGUAAGUG 3' ||:||*||||||||:* miRNA: 3' CAUAC-CGGCAUUCG- 5'	no
NW_020855150.1_28212	rna-XM_010737310.3	gene-lyrm2	lyrm2	LYR motif containing 2	104	123	162	-26.75	miRNA: 3' ucCCACCAUACCGGCAUUCg 5' **||||||:|*||:|||||* target: 5' caGGTGGTGTCGCTGTAAGg 3'	105	124	-30.3	0.000539	target: 5' GUGUCGCUGUAAGG 3' ||:|*||:|||||* miRNA: 3' CAUACCGGCAUUCG 5'	no
NW_020856366.1_28516	rna-XM_019270323.2	gene-patl2	patl2	PAT1 homolog 2	443	470	166	-25.4	miRNA: 3' uuUCCA-GGUGAAUG-----AUUACAAa 5' *:||||*||||||||*****|||||||| target: 5' tgAGGTACCACTTACTGAGATAATGTTt 3'	443	464	-28.8	0.008849	target: 5' ACCACUUACUGAGAUAAUGUUUG 3' *|||||||||*****|||||||* miRNA: 3' -GGUGAAUGA-----UUACAAA- 5'	no
NW_020859945.1_29168	rna-XM_027278540.1	gene-anapc1	anapc1	anaphase promoting complex subunit 1	108	128	162	-25.61	miRNA: 3' ucccaCCAUAC-CGGCAUUCg 5' **|**|||:||*||||||||: target: 5' ctgcaGGTGTGTGCCGTAAGt 3'	112	131	-30.2	0.003504	target: 5' GUGUGUGCCGUAAGUG 3' ||:||*||||||||:* miRNA: 3' CAUAC-CGGCAUUCG- 5'	no
NW_020859945.1_29168	rna-XM_010737310.3	gene-lyrm2	lyrm2	LYR motif containing 2	104	123	162	-26.75	miRNA: 3' ucCCACCAUACCGGCAUUCg 5' **||||||:|*||:|||||* target: 5' caGGTGGTGTCGCTGTAAGg 3'	105	124	-30.3	0.000539	target: 5' GUGUCGCUGUAAGG 3' ||:|*||:|||||* miRNA: 3' CAUACCGGCAUUCG 5'	no
dre-miR-133a-3p	rna-XM_019277170.2	gene-aqr	aqr	aquarius intron-binding spliceosomal factor, transcript variant X2	38	59	163	-27.73	miRNA: 3' gucgaccAACUUCCCCUGGUUu 5' :******||*:||||||||||: target: 5' tcagataTTTGAGGGGACCAAg 3'	38	59	-28.1	0.001317	target: 5' AUUUG-AGGGGACCAAGU 3' **|||*||||||||||:* miRNA: 3' CCAACUUCCCCUGGUUU- 5'	no
dre-miR-133a-3p	rna-XM_019266805.2	gene-LOC104936787	LOC104936787	netrin receptor UNC5D	2095	2118	163	-30.54	miRNA: 3' guCGACCA--ACUUCCCCUGGUUu 5' *|||||||**||||*|||||||:* target: 5' gaGCTGGTAGTGAATGGGACCAGc 3'	2093	2114	-35.7	0.004021	target: 5' GUAGUGAAUGGGACCAGC 3' ||**||||*|||||||:* miRNA: 3' CA--ACUUCCCCUGGUUU 5'	no
dre-miR-133a-3p	rna-XM_027281334.1	gene-LOC104929622	LOC104929622	C-myc promoter-binding protein, transcript variant X7	2928	2950	165	-31.26	miRNA: 3' gucgACCAACUUCC-CCUGGUUu 5' ****||||||||||*|||||:|* target: 5' acaaTGGTTGAAGGAGGACCGAc 3'	2920	2941	-35.9	0.002381	target: 5' ACAAUGGUUGAAGGAGGACCGAC 3' ****||||||||||*|||||:|* miRNA: 3' ----ACCAACUUCC-CCUGGUUU 5'	no
dre-miR-133a-3p	rna-XM_019270504.2	gene-znf821	znf821	zinc finger protein 821, transcript variant X4	11	33	162	-30.3	miRNA: 3' gucGACCAAC-UUCCCCUGGUUu 5' |**||||**|*::|||||||||* target: 5' ccaCTGGGGGCGGGGGGACCAAt 3'	8	29	-32.5	0.00329	target: 5' CUGGGGGCGGGGGGACCAAU 3' *|||**|*::|||||||||* miRNA: 3' -ACCAAC-UUCCCCUGGUUU 5'	no
dre-miR-133a-3p	rna-XM_027277266.1	gene-LOC104919652	LOC104919652	collagen alpha-1(II) chain, transcript variant X6	279	301	162	-27.85	miRNA: 3' gucGACCAACUUC-CCCUGGUUu 5' *:*|*||**||||*||||||||: target: 5' agcCAGGAGGAAGAGGGACCAAg 3'	278	299	-31.1	0.006611	target: 5' GGAGGAAGAGGGACCAAGC 3' ||**||||*||||||||:* miRNA: 3' CCAACUUC-CCCUGGUUU- 5'	no
dre-miR-133a-3p	rna-XM_019254852.2	gene-plekha2	plekha2	pleckstrin homology domain containing A2, transcript variant X1	188	207	165	-34.77	miRNA: 3' guCGACCAACUUCCCCUGGUUu 5' |||||||***|:|||||||||: target: 5' caGCTGG--AAGGGGGACCAAg 3'	187	208	-37.3	0.000264	target: 5' GGA--AGGGGGACCAAGG 3' ||***|:|||||||||:* miRNA: 3' CCAACUUCCCCUGGUUU- 5'	no
dre-miR-133a-3p	rna-XM_010743413.3	gene-lag3	lag3	lymphocyte activating 3	512	533	165	-24.34	miRNA: 3' gucgaccaaCUUCCCCUGGUUu 5' *:****|**||||||||||||* target: 5' ggaaaagaaGAAGGGGACCAAt 3'	493	514	-30.5	0.003455	target: 5' ACUUCCCUACAAGGGAAAAGAAGAAGGGGACCAAU 3' ************||********||||||||||||* miRNA: 3' ------------CCAA------CUUCCCCUGGUUU 5'	no
dre-miR-133a-3p	rna-XM_027281331.1	gene-LOC104929622	LOC104929622	C-myc promoter-binding protein, transcript variant X7	2928	2950	165	-31.26	miRNA: 3' gucgACCAACUUCC-CCUGGUUu 5' ****||||||||||*|||||:|* target: 5' acaaTGGTTGAAGGAGGACCGAc 3'	2920	2941	-35.9	0.002381	target: 5' ACAAUGGUUGAAGGAGGACCGAC 3' ****||||||||||*|||||:|* miRNA: 3' ----ACCAACUUCC-CCUGGUUU 5'	no
dre-miR-133a-3p	rna-XM_010736298.3	gene-itga3	itga3	integrin subunit alpha 3, transcript variant X2	34	55	160	-28.8	miRNA: 3' guCGACCAACUUCCCCUGGUUu 5' **|||||||||***||:||||| target: 5' acGCTGGTTGACACGGGCCAAa 3'	35	56	-32.3	0.003584	target: 5' GUUGACACGGGCCAAAC 3' |||||***||:|||||* miRNA: 3' CAACUUCCCCUGGUUU- 5'	no
dre-miR-133a-3p	rna-XM_010745537.3	gene-ppm1d	ppm1d	protein phosphatase, Mg2+/Mn2+ dependent 1D, transcript variant X2	952	973	175	-29.81	miRNA: 3' gucGACCAACUUCCCCUGGUUu 5' |**||||||**:|||||||||* target: 5' cctCTGGTTCTGGGGGACCAAc 3'	954	975	-32.5	0.005413	target: 5' GUUCUGGGGGACCAAC 3' |||**:|||||||||* miRNA: 3' CAACUUCCCCUGGUUU 5'	no
dre-miR-133a-3p	rna-XM_010733698.3	gene-plekha2	plekha2	pleckstrin homology domain containing A2, transcript variant X1	188	207	165	-34.77	miRNA: 3' guCGACCAACUUCCCCUGGUUu 5' |||||||***|:|||||||||: target: 5' caGCTGG--AAGGGGGACCAAg 3'	187	208	-37.3	0.000264	target: 5' GGA--AGGGGGACCAAGG 3' ||***|:|||||||||:* miRNA: 3' CCAACUUCCCCUGGUUU- 5'	no
dre-miR-133a-3p	rna-XM_010731491.3	gene-znf821	znf821	zinc finger protein 821, transcript variant X4	11	33	162	-30.3	miRNA: 3' gucGACCAAC-UUCCCCUGGUUu 5' |**||||**|*::|||||||||* target: 5' ccaCTGGGGGCGGGGGGACCAAt 3'	8	29	-32.5	0.00329	target: 5' CUGGGGGCGGGGGGACCAAU 3' *|||**|*::|||||||||* miRNA: 3' -ACCAAC-UUCCCCUGGUUU 5'	no
dre-miR-133a-3p	rna-XM_019269528.2	gene-LOC104938664	LOC104938664	myosin-9, transcript variant X2	461	481	161	-29.02	miRNA: 3' gucGACCAACUUCCCCUGGUUu 5' :**||||**|*:|||||||||| target: 5' ttaCTGGAAG-GGGGGACCAAa 3'	463	484	-30.7	0.008592	target: 5' GAA-GGGGGGACCAAAG 3' |***::||||||||||* miRNA: 3' CAACUUCCCCUGGUUU- 5'	no
dre-miR-133a-3p	rna-XM_027281336.1	gene-LOC104929622	LOC104929622	C-myc promoter-binding protein, transcript variant X7	2928	2950	165	-31.26	miRNA: 3' gucgACCAACUUCC-CCUGGUUu 5' ****||||||||||*|||||:|* target: 5' acaaTGGTTGAAGGAGGACCGAc 3'	2920	2941	-35.9	0.002381	target: 5' ACAAUGGUUGAAGGAGGACCGAC 3' ****||||||||||*|||||:|* miRNA: 3' ----ACCAACUUCC-CCUGGUUU 5'	no
dre-miR-133a-3p	rna-XM_010731716.3	gene-LOC104919652	LOC104919652	collagen alpha-1(II) chain, transcript variant X6	279	301	162	-27.85	miRNA: 3' gucGACCAACUUC-CCCUGGUUu 5' *:*|*||**||||*||||||||: target: 5' agcCAGGAGGAAGAGGGACCAAg 3'	278	299	-31.1	0.006611	target: 5' GGAGGAAGAGGGACCAAGC 3' ||**||||*||||||||:* miRNA: 3' CCAACUUC-CCCUGGUUU- 5'	no
dre-miR-133a-3p	rna-XM_019269527.2	gene-LOC104938664	LOC104938664	myosin-9, transcript variant X2	461	481	161	-29.02	miRNA: 3' gucGACCAACUUCCCCUGGUUu 5' :**||||**|*:|||||||||| target: 5' ttaCTGGAAG-GGGGGACCAAa 3'	463	484	-30.7	0.008592	target: 5' GAA-GGGGGGACCAAAG 3' |***::||||||||||* miRNA: 3' CAACUUCCCCUGGUUU- 5'	no
dre-miR-133a-3p	rna-XM_019270503.2	gene-znf821	znf821	zinc finger protein 821, transcript variant X4	11	33	162	-30.3	miRNA: 3' gucGACCAAC-UUCCCCUGGUUu 5' |**||||**|*::|||||||||* target: 5' ccaCTGGGGGCGGGGGGACCAAt 3'	8	29	-32.5	0.00329	target: 5' CUGGGGGCGGGGGGACCAAU 3' *|||**|*::|||||||||* miRNA: 3' -ACCAAC-UUCCCCUGGUUU 5'	no
dre-miR-133a-3p	rna-XM_010730770.3	gene-LOC104918891	LOC104918891	28 kDa heat- and acid-stable phosphoprotein	91	112	161	-25.44	miRNA: 3' gucgaccaaCUUCCCCUGGUUu 5' *:*******|:||||||||||* target: 5' agagaacggGGAGGGGACCAAt 3'	83	104	-31.6	0.001248	target: 5' GAAGAGAACGGGGAGGGGACCAAU 3' |**********|:||||||||||* miRNA: 3' CAA--------CUUCCCCUGGUUU 5'	no
dre-miR-133a-3p	rna-XM_027277267.1	gene-LOC104919652	LOC104919652	collagen alpha-1(II) chain, transcript variant X6	279	301	162	-27.85	miRNA: 3' gucGACCAACUUC-CCCUGGUUu 5' *:*|*||**||||*||||||||: target: 5' agcCAGGAGGAAGAGGGACCAAg 3'	278	299	-31.1	0.006611	target: 5' GGAGGAAGAGGGACCAAGC 3' ||**||||*||||||||:* miRNA: 3' CCAACUUC-CCCUGGUUU- 5'	no
dre-miR-133a-3p	rna-XM_019272495.2	gene-gosr1	gosr1	golgi SNAP receptor complex member 1	134	155	167	-23.28	miRNA: 3' gucgaccAACUUCCCCUGGUUu 5' |***|**|||||*||||||||* target: 5' ccagttcTTGAATGGGACCAAc 3'	134	155	-27	0.009494	target: 5' C-UUGAAUGGGACCAAC 3' **|||||*||||||||* miRNA: 3' CCAACUUCCCCUGGUUU 5'	no
dre-miR-133a-3p	rna-XM_027281333.1	gene-LOC104929622	LOC104929622	C-myc promoter-binding protein, transcript variant X7	2928	2950	165	-31.26	miRNA: 3' gucgACCAACUUCC-CCUGGUUu 5' ****||||||||||*|||||:|* target: 5' acaaTGGTTGAAGGAGGACCGAc 3'	2920	2941	-35.9	0.002381	target: 5' ACAAUGGUUGAAGGAGGACCGAC 3' ****||||||||||*|||||:|* miRNA: 3' ----ACCAACUUCC-CCUGGUUU 5'	no
dre-miR-133a-3p	rna-XM_019277171.2	gene-aqr	aqr	aquarius intron-binding spliceosomal factor, transcript variant X2	38	59	163	-27.73	miRNA: 3' gucgaccAACUUCCCCUGGUUu 5' :******||*:||||||||||: target: 5' tcagataTTTGAGGGGACCAAg 3'	38	59	-28.1	0.001317	target: 5' AUUUG-AGGGGACCAAGU 3' **|||*||||||||||:* miRNA: 3' CCAACUUCCCCUGGUUU- 5'	no
dre-miR-133a-3p	rna-XM_027281330.1	gene-LOC104929622	LOC104929622	C-myc promoter-binding protein, transcript variant X7	2928	2950	165	-31.26	miRNA: 3' gucgACCAACUUCC-CCUGGUUu 5' ****||||||||||*|||||:|* target: 5' acaaTGGTTGAAGGAGGACCGAc 3'	2920	2941	-35.9	0.002381	target: 5' ACAAUGGUUGAAGGAGGACCGAC 3' ****||||||||||*|||||:|* miRNA: 3' ----ACCAACUUCC-CCUGGUUU 5'	no
dre-miR-133a-3p	rna-XM_010740160.3	gene-tm7sf2	tm7sf2	transmembrane 7 superfamily member 2	11	32	175	-26.21	miRNA: 3' gucGACCAACUUCCCCUGGUUu 5' *:*:||||*|||*||||||||| target: 5' agaTTGGTGGAACGGGACCAAa 3'	9	30	-31.6	0.003725	target: 5' UGGUGGAACGGGACCAAAA 3' ||||*|||*|||||||||* miRNA: 3' ACCAACUUCCCCUGGUUU- 5'	no
dre-miR-133a-3p	rna-XM_027281335.1	gene-LOC104929622	LOC104929622	C-myc promoter-binding protein, transcript variant X7	2928	2950	165	-31.26	miRNA: 3' gucgACCAACUUCC-CCUGGUUu 5' ****||||||||||*|||||:|* target: 5' acaaTGGTTGAAGGAGGACCGAc 3'	2920	2941	-35.9	0.002381	target: 5' ACAAUGGUUGAAGGAGGACCGAC 3' ****||||||||||*|||||:|* miRNA: 3' ----ACCAACUUCC-CCUGGUUU 5'	no
dre-miR-133a-3p	rna-XM_027277269.1	gene-LOC104919652	LOC104919652	collagen alpha-1(II) chain, transcript variant X6	279	301	162	-27.85	miRNA: 3' gucGACCAACUUC-CCCUGGUUu 5' *:*|*||**||||*||||||||: target: 5' agcCAGGAGGAAGAGGGACCAAg 3'	278	299	-31.1	0.006611	target: 5' GGAGGAAGAGGGACCAAGC 3' ||**||||*||||||||:* miRNA: 3' CCAACUUC-CCCUGGUUU- 5'	no
dre-miR-133a-3p	rna-XM_019270505.2	gene-znf821	znf821	zinc finger protein 821, transcript variant X4	11	33	162	-30.3	miRNA: 3' gucGACCAAC-UUCCCCUGGUUu 5' |**||||**|*::|||||||||* target: 5' ccaCTGGGGGCGGGGGGACCAAt 3'	8	29	-32.5	0.00329	target: 5' CUGGGGGCGGGGGGACCAAU 3' *|||**|*::|||||||||* miRNA: 3' -ACCAAC-UUCCCCUGGUUU 5'	no
dre-miR-133a-3p	rna-XM_027281338.1	gene-LOC104929622	LOC104929622	C-myc promoter-binding protein, transcript variant X7	2928	2950	165	-31.26	miRNA: 3' gucgACCAACUUCC-CCUGGUUu 5' ****||||||||||*|||||:|* target: 5' acaaTGGTTGAAGGAGGACCGAc 3'	2920	2941	-35.9	0.002381	target: 5' ACAAUGGUUGAAGGAGGACCGAC 3' ****||||||||||*|||||:|* miRNA: 3' ----ACCAACUUCC-CCUGGUUU 5'	no
dre-miR-133a-3p	rna-XM_010731554.3	gene-angptl7	angptl7	angiopoietin like 7	410	431	172	-22.7	miRNA: 3' guCGACCAACUUCCCCUGGUUu 5' *||:||*|*|||*||||||||* target: 5' gaGTTGCTGGAATGGGACCAAc 3'	410	431	-27.9	0.00793	target: 5' CUGGAAUGGGACCAAC 3' *|*|||*||||||||* miRNA: 3' CAACUUCCCCUGGUUU 5'	no
dre-miR-133a-3p	rna-XM_019260369.2	gene-tmem234	tmem234	transmembrane protein 234	371	395	167	-25.97	miRNA: 3' guCGACC---AACUUCCCCUGGUUu 5' *:|||||***|||||**|||||||* target: 5' ggGCTGGGGTTTGAAATGGACCAAt 3'	371	392	-30.4	0.003931	target: 5' GGGUUUGAAAUGGACCAAU 3' |****||||**|||||||* miRNA: 3' CA---ACUUCCCCUGGUUU 5'	no
dre-miR-133a-3p	rna-XM_010729695.3	gene-LOC104918070	LOC104918070	tumor necrosis factor alpha-induced protein 8-like protein 1	1090	1111	160	-30.79	miRNA: 3' guCGACCAACUUCCCCUGGUUu 5' |||||||*||||**||||||:: target: 5' caGCTGGATGAAAAGGACCAGg 3'	1088	1109	-32.8	0.007591	target: 5' GGAUGAAAAGGACCAGG 3' ||*||||**||||||:: miRNA: 3' CCAACUUCCCCUGGUUU 5'	no
dre-miR-133a-3p	rna-XM_010745536.3	gene-ppm1d	ppm1d	protein phosphatase, Mg2+/Mn2+ dependent 1D, transcript variant X2	952	973	175	-29.81	miRNA: 3' gucGACCAACUUCCCCUGGUUu 5' |**||||||**:|||||||||* target: 5' cctCTGGTTCTGGGGGACCAAc 3'	954	975	-32.5	0.005413	target: 5' GUUCUGGGGGACCAAC 3' |||**:|||||||||* miRNA: 3' CAACUUCCCCUGGUUU 5'	no
dre-miR-133a-3p	rna-XM_010731141.3	gene-tecta	tecta	tectorin alpha	1116	1137	169	-27.38	miRNA: 3' gucgaCCAACUUCCCCUGGUUu 5' ::***|||||**|||||||||* target: 5' tgaaaGGTTGTTGGGGACCAAt 3'	1119	1140	-32.5	0.006452	target: 5' GUUGUUGGGGACCAAU 3' ||||**|||||||||* miRNA: 3' CAACUUCCCCUGGUUU 5'	no
dre-miR-133a-3p	rna-XM_027277268.1	gene-LOC104919652	LOC104919652	collagen alpha-1(II) chain, transcript variant X6	279	301	162	-27.85	miRNA: 3' gucGACCAACUUC-CCCUGGUUu 5' *:*|*||**||||*||||||||: target: 5' agcCAGGAGGAAGAGGGACCAAg 3'	278	299	-31.1	0.006611	target: 5' GGAGGAAGAGGGACCAAGC 3' ||**||||*||||||||:* miRNA: 3' CCAACUUC-CCCUGGUUU- 5'	no
dre-miR-133a-3p	rna-XM_010731490.3	gene-znf821	znf821	zinc finger protein 821, transcript variant X4	11	33	162	-30.3	miRNA: 3' gucGACCAAC-UUCCCCUGGUUu 5' |**||||**|*::|||||||||* target: 5' ccaCTGGGGGCGGGGGGACCAAt 3'	8	29	-32.5	0.00329	target: 5' CUGGGGGCGGGGGGACCAAU 3' *|||**|*::|||||||||* miRNA: 3' -ACCAAC-UUCCCCUGGUUU 5'	no
dre-miR-133a-3p	rna-XM_027281332.1	gene-LOC104929622	LOC104929622	C-myc promoter-binding protein, transcript variant X7	2928	2950	165	-31.26	miRNA: 3' gucgACCAACUUCC-CCUGGUUu 5' ****||||||||||*|||||:|* target: 5' acaaTGGTTGAAGGAGGACCGAc 3'	2920	2941	-35.9	0.002381	target: 5' ACAAUGGUUGAAGGAGGACCGAC 3' ****||||||||||*|||||:|* miRNA: 3' ----ACCAACUUCC-CCUGGUUU 5'	no
dre-miR-133a-3p	rna-XM_027275303.1	gene-LOC104939700	LOC104939700	sodium bicarbonate cotransporter 3	51	72	165	-24.78	miRNA: 3' gucgaCCAACUUCCCCUGGUUu 5' ||***|||*||:|*|||||||* target: 5' caaaaGGTGGAGGTGGACCAAt 3'	42	63	-31.4	0.001147	target: 5' GGCCAAAAGGUGGAGGUGGACCAAU 3' |*********||:|||*|||||||* miRNA: 3' CA--------ACUUCC-CCUGGUUU 5'	no
dre-miR-133a-3p	rna-XM_027281337.1	gene-LOC104929622	LOC104929622	C-myc promoter-binding protein, transcript variant X7	2928	2950	165	-31.26	miRNA: 3' gucgACCAACUUCC-CCUGGUUu 5' ****||||||||||*|||||:|* target: 5' acaaTGGTTGAAGGAGGACCGAc 3'	2920	2941	-35.9	0.002381	target: 5' ACAAUGGUUGAAGGAGGACCGAC 3' ****||||||||||*|||||:|* miRNA: 3' ----ACCAACUUCC-CCUGGUUU 5'	no
dre-miR-133a-3p	rna-XM_010731717.3	gene-LOC104919652	LOC104919652	collagen alpha-1(II) chain, transcript variant X6	279	301	162	-27.85	miRNA: 3' gucGACCAACUUC-CCCUGGUUu 5' *:*|*||**||||*||||||||: target: 5' agcCAGGAGGAAGAGGGACCAAg 3'	278	299	-31.1	0.006611	target: 5' GGAGGAAGAGGGACCAAGC 3' ||**||||*||||||||:* miRNA: 3' CCAACUUC-CCCUGGUUU- 5'	no
dre-miR-133a-3p	rna-XM_010739002.3	gene-LOC104925391	LOC104925391	dnaJ homolog subfamily B member 1	58	79	160	-26.08	miRNA: 3' guCGACCAACUUCCCCUGGUUu 5' *:|||||**||***|||||||| target: 5' ggGCTGGGCGATATGGACCAAa 3'	58	79	-31.2	0.006071	target: 5' GGCGAUAUGGACCAAAA 3' |**||***||||||||* miRNA: 3' CAACUUCCCCUGGUUU- 5'	no
dre-miR-133a-3p	rna-XM_019270502.2	gene-znf821	znf821	zinc finger protein 821, transcript variant X4	11	33	162	-30.3	miRNA: 3' gucGACCAAC-UUCCCCUGGUUu 5' |**||||**|*::|||||||||* target: 5' ccaCTGGGGGCGGGGGGACCAAt 3'	8	29	-32.5	0.00329	target: 5' CUGGGGGCGGGGGGACCAAU 3' *|||**|*::|||||||||* miRNA: 3' -ACCAAC-UUCCCCUGGUUU 5'	no
dre-miR-133a-3p	rna-XM_019261167.2	gene-dynlt3	dynlt3	dynein light chain Tctex-type 3	75	96	160	-20.11	miRNA: 3' guCGACCAACUUCCCCUGGUUu 5' **|:||*||*:**||||||||: target: 5' gtGTTGCTTTGCAGGGACCAAg 3'	79	100	-23.7	0.006756	target: 5' -UUGCA-GGGACCAAGG 3' *|||*|*||||||||:* miRNA: 3' CAACUUCCCCUGGUUU- 5'	no
dre-miR-183-5p	rna-XM_019270173.2	gene-pikfyve	pikfyve	phosphoinositide kinase, FYVE-type zinc finger containing, transcript variant X5	328	350	173	-23.3	miRNA: 3' gucacuUAAGAUGGUCACGGUAu 5' :*****|||:||::||||||||: target: 5' ttcattATTTTATTAGTGCCATg 3'	325	347	-27.8	0.006411	target: 5' AUUAUUUUAUUAGUGCCAUGA 3' ***|||:||::||||||||:* miRNA: 3' ---UAAGAUGGUCACGGUAU- 5'	no
dre-miR-183-5p	rna-XM_027281918.1	gene-pikfyve	pikfyve	phosphoinositide kinase, FYVE-type zinc finger containing, transcript variant X5	328	350	173	-23.3	miRNA: 3' gucacuUAAGAUGGUCACGGUAu 5' :*****|||:||::||||||||: target: 5' ttcattATTTTATTAGTGCCATg 3'	325	347	-27.8	0.006411	target: 5' AUUAUUUUAUUAGUGCCAUGA 3' ***|||:||::||||||||:* miRNA: 3' ---UAAGAUGGUCACGGUAU- 5'	no
dre-miR-183-5p	rna-XM_027289692.1	gene-cic	cic	capicua transcriptional repressor, transcript variant X3	827	850	180	-30.8	miRNA: 3' guCACUU-AAGAUGGUCACGGUAu 5' *||||:|*||||:*|||||||||* target: 5' aaGTGGACTTCTGGCAGTGCCATc 3'	827	849	-33.6	0.003596	target: 5' ACUUCUGGCAGUGCCAUC 3' |*||||:*|||||||||* miRNA: 3' U-AAGAUGGUCACGGUAU 5'	no
dre-miR-183-5p	rna-XM_019266235.2	gene-vit	vit	vitrin, transcript variant X4	215	238	168	-26.94	miRNA: 3' guCACUUA-AGAUGGUCACGGUAu 5' ||||*|*|*|||:|::|||||||| target: 5' caGTTATTCTCTGCTGGTGCCATa 3'	214	236	-30.8	0.005954	target: 5' AUUCUCUGCUGGUGCCAUAA 3' |*|*|||:|::||||||||* miRNA: 3' UUA-AGAUGGUCACGGUAU- 5'	no
dre-miR-183-5p	rna-XM_019266237.2	gene-vit	vit	vitrin, transcript variant X4	215	238	168	-26.94	miRNA: 3' guCACUUA-AGAUGGUCACGGUAu 5' ||||*|*|*|||:|::|||||||| target: 5' caGTTATTCTCTGCTGGTGCCATa 3'	214	236	-30.8	0.005954	target: 5' AUUCUCUGCUGGUGCCAUAA 3' |*|*|||:|::||||||||* miRNA: 3' UUA-AGAUGGUCACGGUAU- 5'	no
dre-miR-183-5p	rna-XM_027278346.1	gene-LOC104930980	LOC104930980	polymeric immunoglobulin receptor, transcript variant X6	131	153	161	-23.51	miRNA: 3' guCACUUAAGAUGGUCACGGUAu 5' *||||||*|:|||**||||:||: target: 5' aaGTGAAATTTACATGTGCTATg 3'	131	153	-25.8	0.006074	target: 5' AAUUUACAUGUGCUAUGC 3' |*|:|||**||||:||:* miRNA: 3' UAAGAUGGUCACGGUAU- 5'	no
dre-miR-183-5p	rna-XM_010739551.3	gene-LOC104925834	LOC104925834	guanylyl cyclase-activating protein 2-like	26	48	161	-23.69	miRNA: 3' guCACUUAAGAUGGUCACGGUAu 5' *:|*|||||:**||||||:|||| target: 5' agGAGAATTTATCCAGTGTCATa 3'	26	48	-27.8	0.002587	target: 5' AUUUAUCCAGUGUCAUAU 3' |||:**||||||:||||* miRNA: 3' UAAGAUGGUCACGGUAU- 5'	no
dre-miR-183-5p	rna-XM_019266236.2	gene-vit	vit	vitrin, transcript variant X4	215	238	168	-26.94	miRNA: 3' guCACUUA-AGAUGGUCACGGUAu 5' ||||*|*|*|||:|::|||||||| target: 5' caGTTATTCTCTGCTGGTGCCATa 3'	214	236	-30.8	0.005954	target: 5' AUUCUCUGCUGGUGCCAUAA 3' |*|*|||:|::||||||||* miRNA: 3' UUA-AGAUGGUCACGGUAU- 5'	no
dre-miR-183-5p	rna-XM_027277305.1	gene-wdr46	wdr46	WD repeat domain 46	239	263	160	-23.56	miRNA: 3' guCACUUAAGAUGGU--CACGGUAu 5' *||||:||**|:|*|**|||||||: target: 5' gaGTGGATAATGCGAGGGTGCCATg 3'	239	261	-28.3	0.004643	target: 5' AUAAUGCGAGGGUGCCAUGG 3' ||**|:|***:|||||||:* miRNA: 3' UAAGAUGG--UCACGGUAU- 5'	no
dre-miR-183-5p	rna-XM_027289691.1	gene-cic	cic	capicua transcriptional repressor, transcript variant X3	827	850	180	-30.8	miRNA: 3' guCACUU-AAGAUGGUCACGGUAu 5' *||||:|*||||:*|||||||||* target: 5' aaGTGGACTTCTGGCAGTGCCATc 3'	827	849	-33.6	0.003596	target: 5' ACUUCUGGCAGUGCCAUC 3' |*||||:*|||||||||* miRNA: 3' U-AAGAUGGUCACGGUAU 5'	no
dre-miR-183-5p	rna-XM_010735964.3	gene-isca1	isca1	iron-sulfur cluster assembly 1	512	534	165	-25.26	miRNA: 3' guCACUUAAGAUGGUCACGGUAu 5' **|||*||||**||||||:|||: target: 5' gtGTGTATTCATCCAGTGTCATg 3'	509	531	-30.4	0.004464	target: 5' UGUAUUCAUCCAGUGUCAUGU 3' ***||||**||||||:|||:* miRNA: 3' U--UAAGAUGGUCACGGUAU- 5'	no
dre-miR-183-5p	rna-XM_027281917.1	gene-pikfyve	pikfyve	phosphoinositide kinase, FYVE-type zinc finger containing, transcript variant X5	328	350	173	-23.3	miRNA: 3' gucacuUAAGAUGGUCACGGUAu 5' :*****|||:||::||||||||: target: 5' ttcattATTTTATTAGTGCCATg 3'	325	347	-27.8	0.006411	target: 5' AUUAUUUUAUUAGUGCCAUGA 3' ***|||:||::||||||||:* miRNA: 3' ---UAAGAUGGUCACGGUAU- 5'	no
dre-miR-183-5p	rna-XM_027288617.1	gene-LOC104919935	LOC104919935	XK-related protein 7	444	466	161	-26.29	miRNA: 3' gucacuUAAGAUGGUCACGGUAu 5' *:****|*||||||||||:|||| target: 5' agacacAATCTACCAGTGTCATa 3'	431	453	-33.2	0.005704	target: 5' AGAUGAUAGACACAAUCUACCAGUGUCAUAG 3' |**************||||||||||:||||* miRNA: 3' UA-------------AGAUGGUCACGGUAU- 5'	no
dre-miR-183-5p	rna-XM_019270631.2	gene-LOC104921978	LOC104921978	phospholipase ABHD3, transcript variant X1	1238	1260	177	-27.51	miRNA: 3' gucacuUAAGAUGGUCACGGUAu 5' ||*|**|||:|:||||||||||: target: 5' cattttATTTTGCCAGTGCCATg 3'	1242	1264	-31.2	0.007764	target: 5' AUUUUGCCAGUGCCAUGG 3' |||:|:||||||||||:* miRNA: 3' UAAGAUGGUCACGGUAU- 5'	no
dre-miR-183-5p	rna-XM_019270169.2	gene-pikfyve	pikfyve	phosphoinositide kinase, FYVE-type zinc finger containing, transcript variant X5	328	350	173	-23.3	miRNA: 3' gucacuUAAGAUGGUCACGGUAu 5' :*****|||:||::||||||||: target: 5' ttcattATTTTATTAGTGCCATg 3'	325	347	-27.8	0.006411	target: 5' AUUAUUUUAUUAGUGCCAUGA 3' ***|||:||::||||||||:* miRNA: 3' ---UAAGAUGGUCACGGUAU- 5'	no
dre-miR-183-5p	rna-XM_010746550.3	gene-sharpin	sharpin	SHANK associated RH domain interactor	504	526	167	-27.42	miRNA: 3' gucacuuaAGAUGGUCACGGUAu 5' |*|*|***|||:||:|||||||| target: 5' ctgcgtcaTCTGCCGGTGCCATa 3'	511	533	-32.2	0.001603	target: 5' -AUCUGCCGGUGCCAUAA 3' **|||:||:||||||||* miRNA: 3' UAAGAUGGUCACGGUAU- 5'	no
dre-miR-183-5p	rna-XM_027275928.1	gene-LOC104939203	LOC104939203	excitatory amino acid transporter 5	172	194	171	-24.38	miRNA: 3' gucaCUUAAGAUGGUCACGGUAu 5' ****||*||:|:||*|||||||: target: 5' attgGATTTTTGCCTGTGCCATg 3'	166	188	-32.2	0.000604	target: 5' AUUGGAUUUUUGCCUGUGCCAUGC 3' ||******|:|:||*|||||||:* miRNA: 3' UA------AGAUGGUCACGGUAU- 5'	no
dre-miR-183-5p	rna-XM_027283579.1	gene-LOC104926654	LOC104926654	transcription factor Sox-10	92	115	164	-22.16	miRNA: 3' guCACUUA-AGAUGGUCACGGUAu 5' **|||*:|*|*|:||*|||||||| target: 5' gtGTGTGTGTGTGCCCGTGCCATa 3'	95	117	-27.3	0.001276	target: 5' G-UGUGCCCGUGCCAUAU 3' :*|*|:||*||||||||* miRNA: 3' UAAGAUGGUCACGGUAU- 5'	no
dre-miR-183-5p	rna-XM_019270174.2	gene-pikfyve	pikfyve	phosphoinositide kinase, FYVE-type zinc finger containing, transcript variant X5	328	350	173	-23.3	miRNA: 3' gucacuUAAGAUGGUCACGGUAu 5' :*****|||:||::||||||||: target: 5' ttcattATTTTATTAGTGCCATg 3'	325	347	-27.8	0.006411	target: 5' AUUAUUUUAUUAGUGCCAUGA 3' ***|||:||::||||||||:* miRNA: 3' ---UAAGAUGGUCACGGUAU- 5'	no
dre-miR-183-5p	rna-XM_027284412.1	gene-LOC104921978	LOC104921978	phospholipase ABHD3, transcript variant X1	1238	1260	177	-27.51	miRNA: 3' gucacuUAAGAUGGUCACGGUAu 5' ||*|**|||:|:||||||||||: target: 5' cattttATTTTGCCAGTGCCATg 3'	1242	1264	-31.2	0.007764	target: 5' AUUUUGCCAGUGCCAUGG 3' |||:|:||||||||||:* miRNA: 3' UAAGAUGGUCACGGUAU- 5'	no
dre-miR-183-5p	rna-XM_027281924.1	gene-pikfyve	pikfyve	phosphoinositide kinase, FYVE-type zinc finger containing, transcript variant X5	328	350	173	-23.3	miRNA: 3' gucacuUAAGAUGGUCACGGUAu 5' :*****|||:||::||||||||: target: 5' ttcattATTTTATTAGTGCCATg 3'	325	347	-27.8	0.006411	target: 5' AUUAUUUUAUUAGUGCCAUGA 3' ***|||:||::||||||||:* miRNA: 3' ---UAAGAUGGUCACGGUAU- 5'	no
dre-miR-183-5p	rna-XM_010736389.3	gene-odc1	odc1	ornithine decarboxylase 1	446	469	176	-32.27	miRNA: 3' guCACUU-AAGAUGGUCACGGUAu 5' *:|||||***:||||||||||||* target: 5' agGTGAAGGGTTACCAGTGCCATt 3'	446	468	-35.5	0.000713	target: 5' AGGGUUACCAGUGCCAUU 3' |***:||||||||||||* miRNA: 3' UAA-GAUGGUCACGGUAU 5'	no
dre-miR-183-5p	rna-XM_027281915.1	gene-pikfyve	pikfyve	phosphoinositide kinase, FYVE-type zinc finger containing, transcript variant X5	328	350	173	-23.3	miRNA: 3' gucacuUAAGAUGGUCACGGUAu 5' :*****|||:||::||||||||: target: 5' ttcattATTTTATTAGTGCCATg 3'	325	347	-27.8	0.006411	target: 5' AUUAUUUUAUUAGUGCCAUGA 3' ***|||:||::||||||||:* miRNA: 3' ---UAAGAUGGUCACGGUAU- 5'	no
dre-miR-183-5p	rna-XM_019259896.2	gene-LOC104919295	LOC104919295	serine/threonine-protein kinase D3, transcript variant X1	957	979	181	-27.93	miRNA: 3' guCACUUAAGAUGGUCACGGUAu 5' :*|||||||:**:|||||||||: target: 5' ttGTGAATTTGTTCAGTGCCATg 3'	958	980	-31.8	0.005282	target: 5' AUUUGUUCAGUGCCAUGA 3' |||:**:|||||||||:* miRNA: 3' UAAGAUGGUCACGGUAU- 5'	no
dre-miR-183-5p	rna-XM_027289693.1	gene-cic	cic	capicua transcriptional repressor, transcript variant X3	827	850	180	-30.8	miRNA: 3' guCACUU-AAGAUGGUCACGGUAu 5' *||||:|*||||:*|||||||||* target: 5' aaGTGGACTTCTGGCAGTGCCATc 3'	827	849	-33.6	0.003596	target: 5' ACUUCUGGCAGUGCCAUC 3' |*||||:*|||||||||* miRNA: 3' U-AAGAUGGUCACGGUAU 5'	no
dre-miR-183-5p	rna-XM_027289694.1	gene-cic	cic	capicua transcriptional repressor, transcript variant X3	827	850	180	-30.8	miRNA: 3' guCACUU-AAGAUGGUCACGGUAu 5' *||||:|*||||:*|||||||||* target: 5' aaGTGGACTTCTGGCAGTGCCATc 3'	827	849	-33.6	0.003596	target: 5' ACUUCUGGCAGUGCCAUC 3' |*||||:*|||||||||* miRNA: 3' U-AAGAUGGUCACGGUAU 5'	no
dre-miR-183-5p	rna-XM_027278347.1	gene-LOC104930980	LOC104930980	polymeric immunoglobulin receptor, transcript variant X6	131	153	161	-23.51	miRNA: 3' guCACUUAAGAUGGUCACGGUAu 5' *||||||*|:|||**||||:||: target: 5' aaGTGAAATTTACATGTGCTATg 3'	131	153	-25.8	0.006074	target: 5' AAUUUACAUGUGCUAUGC 3' |*|:|||**||||:||:* miRNA: 3' UAAGAUGGUCACGGUAU- 5'	no
dre-miR-183-5p	rna-XM_019270632.2	gene-LOC104921978	LOC104921978	phospholipase ABHD3, transcript variant X1	1238	1260	177	-27.51	miRNA: 3' gucacuUAAGAUGGUCACGGUAu 5' ||*|**|||:|:||||||||||: target: 5' cattttATTTTGCCAGTGCCATg 3'	1242	1264	-31.2	0.007764	target: 5' AUUUUGCCAGUGCCAUGG 3' |||:|:||||||||||:* miRNA: 3' UAAGAUGGUCACGGUAU- 5'	no
dre-miR-183-5p	rna-XM_010746232.3	gene-sumf1	sumf1	sulfatase modifying factor 1	80	101	175	-28.41	miRNA: 3' guCACUUAAGAUGGUCACGGUAu 5' :||||:|||||*:*||||||||* target: 5' taGTGGATTCT-TAAGTGCCATc 3'	79	101	-31.8	0.000887	target: 5' GAUUCUUA-AGUGCCAUC 3' :|||||***||||||||* miRNA: 3' UUAAGAUGGUCACGGUAU 5'	no
dre-miR-183-5p	rna-XM_027281922.1	gene-pikfyve	pikfyve	phosphoinositide kinase, FYVE-type zinc finger containing, transcript variant X5	328	350	173	-23.3	miRNA: 3' gucacuUAAGAUGGUCACGGUAu 5' :*****|||:||::||||||||: target: 5' ttcattATTTTATTAGTGCCATg 3'	325	347	-27.8	0.006411	target: 5' AUUAUUUUAUUAGUGCCAUGA 3' ***|||:||::||||||||:* miRNA: 3' ---UAAGAUGGUCACGGUAU- 5'	no
dre-miR-183-5p	rna-XM_027289861.1	gene-LOC104928131	LOC104928131	adhesion G-protein coupled receptor D2-like, transcript variant X2	3183	3208	171	-32.84	miRNA: 3' guCACUUA--AG-AUGGUCACGGUAu 5' |:||||:|**||**|||||||||||| target: 5' cgGTGAGTAGTCAGACCAGTGCCATa 3'	3179	3201	-35.9	0.003652	target: 5' AGUAGUCAGACCAGUGCCAUAC 3' |:|**||**||||||||||||* miRNA: 3' UUA--AGA-UGGUCACGGUAU- 5'	no
dre-miR-183-5p	rna-XM_019254338.2	gene-LOC104924404	LOC104924404	adaptin ear-binding coat-associated protein 1	1517	1539	165	-28.67	miRNA: 3' gucacuUAAGAUGGUCACGGUAu 5' *|*|**||||||||:|||||:|* target: 5' gattatATTCTACCGGTGCCGTt 3'	1515	1537	-31.6	0.009195	target: 5' UUAUAUUCUACCGGUGCCGUU 3' ****||||||||:|||||:|* miRNA: 3' ----UAAGAUGGUCACGGUAU 5'	no
dre-miR-183-5p	rna-XM_010751754.3	gene-LOC104935852	LOC104935852	ubiquitin-60S ribosomal protein L40	8	32	171	-20.95	miRNA: 3' gucACUUAA--GAUGGUCACGGUAu 5' *|*||||||**||*::||||||||* target: 5' aacTGAATTGGCTCTTAGTGCCATt 3'	10	32	-23.7	0.00174	target: 5' AUUGGCUCUUAGUGCCAUU 3' |||**||*::||||||||* miRNA: 3' UAA--GAUGGUCACGGUAU 5'	no
dre-miR-183-5p	rna-XM_019259890.2	gene-LOC104919295	LOC104919295	serine/threonine-protein kinase D3, transcript variant X1	957	979	181	-27.93	miRNA: 3' guCACUUAAGAUGGUCACGGUAu 5' :*|||||||:**:|||||||||: target: 5' ttGTGAATTTGTTCAGTGCCATg 3'	958	980	-31.8	0.005282	target: 5' AUUUGUUCAGUGCCAUGA 3' |||:**:|||||||||:* miRNA: 3' UAAGAUGGUCACGGUAU- 5'	no
dre-miR-183-5p	rna-XM_019266238.2	gene-vit	vit	vitrin, transcript variant X4	215	238	168	-26.94	miRNA: 3' guCACUUA-AGAUGGUCACGGUAu 5' ||||*|*|*|||:|::|||||||| target: 5' caGTTATTCTCTGCTGGTGCCATa 3'	214	236	-30.8	0.005954	target: 5' AUUCUCUGCUGGUGCCAUAA 3' |*|*|||:|::||||||||* miRNA: 3' UUA-AGAUGGUCACGGUAU- 5'	no
dre-miR-183-5p	rna-XM_019270168.2	gene-pikfyve	pikfyve	phosphoinositide kinase, FYVE-type zinc finger containing, transcript variant X5	328	350	173	-23.3	miRNA: 3' gucacuUAAGAUGGUCACGGUAu 5' :*****|||:||::||||||||: target: 5' ttcattATTTTATTAGTGCCATg 3'	325	347	-27.8	0.006411	target: 5' AUUAUUUUAUUAGUGCCAUGA 3' ***|||:||::||||||||:* miRNA: 3' ---UAAGAUGGUCACGGUAU- 5'	no
dre-miR-183-5p	rna-XM_019270633.2	gene-LOC104921978	LOC104921978	phospholipase ABHD3, transcript variant X1	1238	1260	177	-27.51	miRNA: 3' gucacuUAAGAUGGUCACGGUAu 5' ||*|**|||:|:||||||||||: target: 5' cattttATTTTGCCAGTGCCATg 3'	1242	1264	-31.2	0.007764	target: 5' AUUUUGCCAGUGCCAUGG 3' |||:|:||||||||||:* miRNA: 3' UAAGAUGGUCACGGUAU- 5'	no
dre-miR-183-5p	rna-XM_019266234.2	gene-vit	vit	vitrin, transcript variant X4	215	238	168	-26.94	miRNA: 3' guCACUUA-AGAUGGUCACGGUAu 5' ||||*|*|*|||:|::|||||||| target: 5' caGTTATTCTCTGCTGGTGCCATa 3'	214	236	-30.8	0.005954	target: 5' AUUCUCUGCUGGUGCCAUAA 3' |*|*|||:|::||||||||* miRNA: 3' UUA-AGAUGGUCACGGUAU- 5'	no
dre-miR-194a	rna-XM_019260814.2	gene-LOC104926245	LOC104926245	collagen alpha-1(XVIII) chain, transcript variant X1	416	436	163	-28.67	miRNA: 3' ggUGUACCUCAACGACAAUGu 5' *||||||**||||||||||:| target: 5' acACATGTTGTTGCTGTTATa 3'	416	436	-31.3	0.005067	target: 5' GUUGUUGCUGUUAUAU 3' |**||||||||||:|* miRNA: 3' CCUCAACGACAAUGU- 5'	no
dre-miR-194a	rna-XM_010752374.3	gene-dbt	dbt	dihydrolipoamide branched chain transacylase E2	793	818	162	-27.9	miRNA: 3' ggUGUACCUCAA-----CGACAAUGu 5' *|||||||*|||*****||||||||| target: 5' gcACATGGTGTTGGTCGGCTGTTACa 3'	793	813	-31.1	0.003261	target: 5' GGUGUUGGUCGGCUGUUACAU 3' ||*|||*****|||||||||* miRNA: 3' CCUCAA-----CGACAAUGU- 5'	no
dre-miR-194a	rna-XM_019262557.2	gene-LOC104923652	LOC104923652	C-C motif chemokine 20	912	932	163	-29.1	miRNA: 3' ggUGUACCUCAACGACAAUGu 5' ||||||||****||||||||| target: 5' ccACATGGCAAGGCTGTTACa 3'	911	931	-32.6	0.001835	target: 5' UGGCAAGGCUGUUACAA 3' |||****|||||||||* miRNA: 3' ACCUCAACGACAAUGU- 5'	no
dre-miR-194a	rna-XM_019260818.2	gene-LOC104926245	LOC104926245	collagen alpha-1(XVIII) chain, transcript variant X1	416	436	163	-28.67	miRNA: 3' ggUGUACCUCAACGACAAUGu 5' *||||||**||||||||||:| target: 5' acACATGTTGTTGCTGTTATa 3'	416	436	-31.3	0.005067	target: 5' GUUGUUGCUGUUAUAU 3' |**||||||||||:|* miRNA: 3' CCUCAACGACAAUGU- 5'	no
dre-miR-194a	rna-XM_019260816.2	gene-LOC104926245	LOC104926245	collagen alpha-1(XVIII) chain, transcript variant X1	416	436	163	-28.67	miRNA: 3' ggUGUACCUCAACGACAAUGu 5' *||||||**||||||||||:| target: 5' acACATGTTGTTGCTGTTATa 3'	416	436	-31.3	0.005067	target: 5' GUUGUUGCUGUUAUAU 3' |**||||||||||:|* miRNA: 3' CCUCAACGACAAUGU- 5'	no
dre-miR-194a	rna-XM_027283108.1	gene-LOC104921547	LOC104921547	SEC14-like protein 1, transcript variant X2	413	434	170	-30.65	miRNA: 3' ggUGU-ACCUCAACGACAAUGu 5' *||||*|||||**||||||||| target: 5' acACACTGGAGGCGCTGTTACa 3'	413	433	-33.1	0.006519	target: 5' UGGAGGCGCUGUUACAU 3' |||||**|||||||||* miRNA: 3' ACCUCAACGACAAUGU- 5'	no
dre-miR-194a	rna-XM_027286380.1	gene-LOC104932382	LOC104932382	hyaluronan synthase 1, transcript variant X3	280	300	167	-31.98	miRNA: 3' ggUGUACCUCAACGACAAUGu 5' :||:||||||*|||||||:|| target: 5' tcATATGGAGATGCTGTTGCa 3'	279	299	-35	0.000159	target: 5' UGGAGAUGCUGUUGCAC 3' |||||*|||||||:||* miRNA: 3' ACCUCAACGACAAUGU- 5'	no
dre-miR-194a	rna-XM_010738187.3	gene-arl14	arl14	ADP ribosylation factor like GTPase 14	462	483	166	-26.45	miRNA: 3' ggUGUACC-UCAACGACAAUGu 5' *||:||||*|**|||||||||| target: 5' acATATGGTACATGCTGTTACa 3'	462	482	-29.3	0.003924	target: 5' GGUACAUGCUGUUACAU 3' ||****||||||||||* miRNA: 3' CCUCA-ACGACAAUGU- 5'	no
dre-miR-194a	rna-XM_019260815.2	gene-LOC104926245	LOC104926245	collagen alpha-1(XVIII) chain, transcript variant X1	416	436	163	-28.67	miRNA: 3' ggUGUACCUCAACGACAAUGu 5' *||||||**||||||||||:| target: 5' acACATGTTGTTGCTGTTATa 3'	416	436	-31.3	0.005067	target: 5' GUUGUUGCUGUUAUAU 3' |**||||||||||:|* miRNA: 3' CCUCAACGACAAUGU- 5'	no
dre-miR-194a	rna-XM_027286379.1	gene-LOC104932382	LOC104932382	hyaluronan synthase 1, transcript variant X3	280	300	167	-31.98	miRNA: 3' ggUGUACCUCAACGACAAUGu 5' :||:||||||*|||||||:|| target: 5' tcATATGGAGATGCTGTTGCa 3'	279	299	-35	0.000159	target: 5' UGGAGAUGCUGUUGCAC 3' |||||*|||||||:||* miRNA: 3' ACCUCAACGACAAUGU- 5'	no
dre-miR-194a	rna-XM_027286381.1	gene-LOC104932382	LOC104932382	hyaluronan synthase 1, transcript variant X3	115	135	167	-31.98	miRNA: 3' ggUGUACCUCAACGACAAUGu 5' :||:||||||*|||||||:|| target: 5' tcATATGGAGATGCTGTTGCa 3'	114	134	-35	7.4e-05	target: 5' UGGAGAUGCUGUUGCAC 3' |||||*|||||||:||* miRNA: 3' ACCUCAACGACAAUGU- 5'	no
dre-miR-194a	rna-XM_019260820.2	gene-LOC104926245	LOC104926245	collagen alpha-1(XVIII) chain, transcript variant X1	416	436	163	-28.67	miRNA: 3' ggUGUACCUCAACGACAAUGu 5' *||||||**||||||||||:| target: 5' acACATGTTGTTGCTGTTATa 3'	416	436	-31.3	0.005067	target: 5' GUUGUUGCUGUUAUAU 3' |**||||||||||:|* miRNA: 3' CCUCAACGACAAUGU- 5'	no
dre-miR-194a	rna-XM_019260819.2	gene-LOC104926245	LOC104926245	collagen alpha-1(XVIII) chain, transcript variant X1	416	436	163	-28.67	miRNA: 3' ggUGUACCUCAACGACAAUGu 5' *||||||**||||||||||:| target: 5' acACATGTTGTTGCTGTTATa 3'	416	436	-31.3	0.005067	target: 5' GUUGUUGCUGUUAUAU 3' |**||||||||||:|* miRNA: 3' CCUCAACGACAAUGU- 5'	no
dre-miR-194a	rna-XM_019269396.2	gene-lrif1	lrif1	ligand dependent nuclear receptor interacting factor 1	231	254	161	-27.36	miRNA: 3' ggUGUACC--UC-AACGACAAUGu 5' ||||:|||**||*||*|||||||: target: 5' ccACGTGGCCAGTTTACTGTTACg 3'	230	250	-28.8	0.003669	target: 5' UGGCCAGUUUACUGUUACGUAAGGCUGUUGCU 3' |||**||||**************||||||:|* miRNA: 3' ACC--UCAA--------------CGACAAUGU 5'	no
dre-miR-194a	rna-XM_027283109.1	gene-LOC104921547	LOC104921547	SEC14-like protein 1, transcript variant X2	413	434	170	-30.65	miRNA: 3' ggUGU-ACCUCAACGACAAUGu 5' *||||*|||||**||||||||| target: 5' acACACTGGAGGCGCTGTTACa 3'	413	433	-33.1	0.006519	target: 5' UGGAGGCGCUGUUACAU 3' |||||**|||||||||* miRNA: 3' ACCUCAACGACAAUGU- 5'	no
dre-miR-196a-5p	rna-XM_010741170.3	gene-hoxb8	hoxb8	homeobox B8, transcript variant X2	700	721	184	-37.83	miRNA: 3' ggGUUGUUGUACUUUGAUGGAu 5' :||||||||||||||||:|||| target: 5' tcCAACAACATGAAACTGCCTa 3'	699	720	-40	3.8e-05	target: 5' CAACAUGAAACUGCCUAU 3' ||||||||||||:||||* miRNA: 3' GUUGUACUUUGAUGGAU- 5'	no
dre-miR-196a-5p	rna-XM_027290549.1	gene-LOC104920653	LOC104920653	RGM domain family member B	658	682	167	-21.46	miRNA: 3' ggGUUGUUGUAC---UUUGAUGGAu 5' **||||*::|||***|||||||||| target: 5' aaCAACTGTATGTAAAAACTACCTa 3'	654	675	-29.2	0.00997	target: 5' CAACUGUAUGUAAAAACUACCUAU 3' ||||***|||***||||||||||* miRNA: 3' GUUG---UAC---UUUGAUGGAU- 5'	no
dre-miR-196a-5p	rna-XM_010732299.3	gene-arap1	arap1	ArfGAP with RhoGAP domain, ankyrin repeat and PH domain 1, transcript variant X3	2141	2162	164	-30.71	miRNA: 3' ggGUUGUUGUACUUUGAUGGAu 5' *|||:||:|||*:||||:|||| target: 5' acCAGCAGCATTGAACTGCCTa 3'	2139	2160	-34.3	0.002969	target: 5' AGCAUUGAACUGCCUAU 3' |:|||*:||||:||||* miRNA: 3' UUGUACUUUGAUGGAU- 5'	no
dre-miR-196a-5p	rna-XM_019257032.2	gene-hoxb8	hoxb8	homeobox B8, transcript variant X2	700	721	184	-37.83	miRNA: 3' ggGUUGUUGUACUUUGAUGGAu 5' :||||||||||||||||:|||| target: 5' tcCAACAACATGAAACTGCCTa 3'	699	720	-40	3.8e-05	target: 5' CAACAUGAAACUGCCUAU 3' ||||||||||||:||||* miRNA: 3' GUUGUACUUUGAUGGAU- 5'	no
dre-miR-196a-5p	rna-XM_010732297.3	gene-arap1	arap1	ArfGAP with RhoGAP domain, ankyrin repeat and PH domain 1, transcript variant X3	2154	2175	164	-30.71	miRNA: 3' ggGUUGUUGUACUUUGAUGGAu 5' *|||:||:|||*:||||:|||| target: 5' acCAGCAGCATTGAACTGCCTa 3'	2152	2173	-34.3	0.002993	target: 5' AGCAUUGAACUGCCUAU 3' |:|||*:||||:||||* miRNA: 3' UUGUACUUUGAUGGAU- 5'	no
dre-miR-196a-5p	rna-XM_010747436.3	gene-hoxc8	hoxc8	homeobox C8	1009	1029	162	-29.05	miRNA: 3' ggGUUGUUGUACUUUGAUGGAu 5' |||||||||*|*|||||:|||| target: 5' ccCAACAAC-TAAAACTGCCTa 3'	1007	1028	-32.1	0.008297	target: 5' CAACUA-AAACUGCCUAU 3' ||||***|||||:||||* miRNA: 3' GUUGUACUUUGAUGGAU- 5'	no
dre-miR-196a-5p	rna-XM_019254741.2	gene-arap1	arap1	ArfGAP with RhoGAP domain, ankyrin repeat and PH domain 1, transcript variant X3	2141	2162	164	-30.71	miRNA: 3' ggGUUGUUGUACUUUGAUGGAu 5' *|||:||:|||*:||||:|||| target: 5' acCAGCAGCATTGAACTGCCTa 3'	2139	2160	-34.3	0.002969	target: 5' AGCAUUGAACUGCCUAU 3' |:|||*:||||:||||* miRNA: 3' UUGUACUUUGAUGGAU- 5'	no
dre-miR-196a-5p	rna-XM_010732298.3	gene-arap1	arap1	ArfGAP with RhoGAP domain, ankyrin repeat and PH domain 1, transcript variant X3	2141	2162	164	-30.71	miRNA: 3' ggGUUGUUGUACUUUGAUGGAu 5' *|||:||:|||*:||||:|||| target: 5' acCAGCAGCATTGAACTGCCTa 3'	2139	2160	-34.3	0.002969	target: 5' AGCAUUGAACUGCCUAU 3' |:|||*:||||:||||* miRNA: 3' UUGUACUUUGAUGGAU- 5'	no
dre-miR-196a-5p	rna-XM_010748059.3	gene-pla2g7	pla2g7	phospholipase A2 group VII, transcript variant X2	619	640	172	-27.64	miRNA: 3' ggGUUGUUGUACUUUGAUGGAu 5' *:|||:||||||*||||:|||* target: 5' gtCAATAACATGCAACTGCCTt 3'	619	640	-29.6	0.005065	target: 5' AACAUGCAACUGCCUU 3' ||||||*||||:|||* miRNA: 3' UUGUACUUUGAUGGAU 5'	no
dre-miR-196a-5p	rna-XM_019252865.2	gene-pla2g7	pla2g7	phospholipase A2 group VII, transcript variant X2	619	640	172	-27.64	miRNA: 3' ggGUUGUUGUACUUUGAUGGAu 5' *:|||:||||||*||||:|||* target: 5' gtCAATAACATGCAACTGCCTt 3'	619	640	-29.6	0.005065	target: 5' AACAUGCAACUGCCUU 3' ||||||*||||:|||* miRNA: 3' UUGUACUUUGAUGGAU 5'	no
dre-miR-196a-5p	rna-XM_010732296.3	gene-arap1	arap1	ArfGAP with RhoGAP domain, ankyrin repeat and PH domain 1, transcript variant X3	2141	2162	164	-30.71	miRNA: 3' ggGUUGUUGUACUUUGAUGGAu 5' *|||:||:|||*:||||:|||| target: 5' acCAGCAGCATTGAACTGCCTa 3'	2139	2160	-34.3	0.002969	target: 5' AGCAUUGAACUGCCUAU 3' |:|||*:||||:||||* miRNA: 3' UUGUACUUUGAUGGAU- 5'	no
dre-miR-205-5p	rna-XM_027289680.1	gene-ap3b2	ap3b2	adaptor related protein complex 3 subunit beta 2, transcript variant X9	598	619	168	-25.99	miRNA: 3' gucugaGGCCACCUUACUUCCu 5' ::****|:|*|||||||||||| target: 5' tgccagCTGTTGGAATGAAGGa 3'	591	612	-30.1	0.009193	target: 5' CUGCCAGCUGUUGGAAUGAAGGAC 3' |:|********||||||||||||* miRNA: 3' GGCC-------ACCUUACUUCCU- 5'	no
dre-miR-205-5p	rna-XM_010746653.3	gene-LOC104931607	LOC104931607	myristoylated alanine-rich C-kinase substrate	12	30	160	-26.18	miRNA: 3' guCUGAGGCCACCUUACUUCCu 5' *||||*||***||||||||||| target: 5' gaGACACC---GGAATGAAGGa 3'	12	33	-28.5	0.009648	target: 5' CC---GGAAUGAAGGAG 3' ||***|||||||||||* miRNA: 3' GGCCACCUUACUUCCU- 5'	no
dre-miR-205-5p	rna-XM_027289684.1	gene-ap3b2	ap3b2	adaptor related protein complex 3 subunit beta 2, transcript variant X9	598	619	168	-25.99	miRNA: 3' gucugaGGCCACCUUACUUCCu 5' ::****|:|*|||||||||||| target: 5' tgccagCTGTTGGAATGAAGGa 3'	591	612	-30.1	0.009193	target: 5' CUGCCAGCUGUUGGAAUGAAGGAC 3' |:|********||||||||||||* miRNA: 3' GGCC-------ACCUUACUUCCU- 5'	no
dre-miR-205-5p	rna-XM_019272282.2	gene-frmd5	frmd5	FERM domain containing 5, transcript variant X1	52	73	164	-31.58	miRNA: 3' guCUGAGGCCACCUUACUUCCu 5' *:||||||||*|*:|||:|||: target: 5' agGACTCCGGAGTGATGGAGGg 3'	52	73	-34	7e-05	target: 5' CCGGAGUGAUGGAGGGC 3' ||||*|*:|||:|||:* miRNA: 3' GGCCACCUUACUUCCU- 5'	no
dre-miR-205-5p	rna-XM_019276659.2	gene-ap3b2	ap3b2	adaptor related protein complex 3 subunit beta 2, transcript variant X9	598	619	168	-25.99	miRNA: 3' gucugaGGCCACCUUACUUCCu 5' ::****|:|*|||||||||||| target: 5' tgccagCTGTTGGAATGAAGGa 3'	591	612	-30.1	0.009193	target: 5' CUGCCAGCUGUUGGAAUGAAGGAC 3' |:|********||||||||||||* miRNA: 3' GGCC-------ACCUUACUUCCU- 5'	no
dre-miR-205-5p	rna-XM_019271414.2	gene-LOC109141339	LOC109141339	claudin-3	87	105	160	-26.6	miRNA: 3' guCUGAGGCCACCUUACUUCCu 5' ::||||||***|*||||||||| target: 5' tgGACTCC---GCAATGAAGGa 3'	87	108	-30.2	0.002954	target: 5' CCGC---AAUGAAGGAU 3' |||****|||||||||* miRNA: 3' GGCCACCUUACUUCCU- 5'	no
dre-miR-205-5p	rna-XM_027288636.1	gene-fam110a	fam110a	family with sequence similarity 110 member A, transcript variant X7	321	343	171	-28.05	miRNA: 3' guCUGAGGCCAC-CUUACUUCCu 5' **||:*:|||||*|:|||||||* target: 5' atGATGTCGGTGAGGATGAAGGc 3'	306	327	-31	0.008203	target: 5' UUGGUAUAAAUGAUGUCGGUGAGGAUGAAGGC 3' |**************:|||||*|:|||||||* miRNA: 3' A--------------GGCCAC-CUUACUUCCU 5'	no
dre-miR-205-5p	rna-XM_027289683.1	gene-ap3b2	ap3b2	adaptor related protein complex 3 subunit beta 2, transcript variant X9	598	619	168	-25.99	miRNA: 3' gucugaGGCCACCUUACUUCCu 5' ::****|:|*|||||||||||| target: 5' tgccagCTGTTGGAATGAAGGa 3'	591	612	-30.1	0.009193	target: 5' CUGCCAGCUGUUGGAAUGAAGGAC 3' |:|********||||||||||||* miRNA: 3' GGCC-------ACCUUACUUCCU- 5'	no
dre-miR-205-5p	rna-XM_027273484.1	gene-hinfp	hinfp	histone H4 transcription factor, transcript variant X2	36	59	166	-31.27	miRNA: 3' guCUG-AGGCCAC-CUUACUUCCu 5' *||||*|:|*|||*|:|||||||| target: 5' gaGACGTTCCGTGTGGATGAAGGa 3'	36	57	-33.7	9.8e-05	target: 5' UUCCGUGUGGA-UGAAGGAU 3' *||||*|||||*|||||||* miRNA: 3' -AGGC-CACCUUACUUCCU- 5'	no
dre-miR-205-5p	rna-XM_019253336.2	gene-fam110a	fam110a	family with sequence similarity 110 member A, transcript variant X7	321	343	171	-28.05	miRNA: 3' guCUGAGGCCAC-CUUACUUCCu 5' **||:*:|||||*|:|||||||* target: 5' atGATGTCGGTGAGGATGAAGGc 3'	306	327	-31	0.008203	target: 5' UUGGUAUAAAUGAUGUCGGUGAGGAUGAAGGC 3' |**************:|||||*|:|||||||* miRNA: 3' A--------------GGCCAC-CUUACUUCCU 5'	no
dre-miR-205-5p	rna-XM_010730864.3	gene-prr7	prr7	proline rich 7, synaptic	276	299	165	-32.46	miRNA: 3' gucUGAGGC-CAC-CUUACUUCCu 5' :**:|||:|*|||*|:|||||||| target: 5' tcaGCTCTGCGTGTGGATGAAGGa 3'	276	297	-33.1	0.004021	target: 5' UCUGCGUGUGGAUGAAGGAG 3' ||:|*|||*|:||||||||* miRNA: 3' AGGC-CAC-CUUACUUCCU- 5'	no
dre-miR-205-5p	rna-XM_019276660.2	gene-ap3b2	ap3b2	adaptor related protein complex 3 subunit beta 2, transcript variant X9	598	619	168	-25.99	miRNA: 3' gucugaGGCCACCUUACUUCCu 5' ::****|:|*|||||||||||| target: 5' tgccagCTGTTGGAATGAAGGa 3'	591	612	-30.1	0.009193	target: 5' CUGCCAGCUGUUGGAAUGAAGGAC 3' |:|********||||||||||||* miRNA: 3' GGCC-------ACCUUACUUCCU- 5'	no
dre-miR-205-5p	rna-XM_027280683.1	gene-LOC104919834	LOC104919834	post-GPI attachment to proteins factor 2-like, transcript variant X2	66	87	161	-25.3	miRNA: 3' gucugaggcCACCUUACUUCCu 5' *:*:*****||||:|||||||| target: 5' agaggaggaGTGGGATGAAGGa 3'	47	68	-30.9	0.0003	target: 5' UUGCUCCUGCUCAAGAGGAGGAGUGGGAUGAAGGAC 3' **:||||*************|*||||:||||||||* miRNA: 3' --UGAGG-------------C-CACCUUACUUCCU- 5'	no
dre-miR-205-5p	rna-XM_010729524.3	gene-dhrs3	dhrs3	dehydrogenase/reductase 3	36	57	170	-25.58	miRNA: 3' gucuGAGGCCACCUUACUUCCu 5' *:**||*:||||*||||||||: target: 5' agctCTGTGGTGTAATGAAGGg 3'	34	55	-29.7	0.006862	target: 5' UCUGUGGUGUAAUGAAGGGA 3' ||:**||||*||||||||:* miRNA: 3' AGG--CCACCUUACUUCCU- 5'	no
dre-miR-205-5p	rna-XM_019273133.2	gene-sts	sts	steroid sulfatase, transcript variant X1	163	185	170	-24.61	miRNA: 3' gucUGAGGCCACCU-UACUUCCu 5' *|*|*|||*|||||*|||||||: target: 5' gaaAATCCAGTGGAGATGAAGGg 3'	160	181	-32.7	0.001309	target: 5' AAUCCAGUGGAGAUGAAGGGA 3' **|||*|||||*|||||||:* miRNA: 3' --AGGCCACCU-UACUUCCU- 5'	no
dre-miR-205-5p	rna-XM_010734071.3	gene-LOC104921521	LOC104921521	claudin-4	17	39	163	-26.86	miRNA: 3' gucugaGGCCACCU-UACUUCCu 5' |||***|*||||||*|||||||| target: 5' cagcagCAGGTGGAGATGAAGGa 3'	16	37	-28.8	0.006005	target: 5' AGCAGGUGGAGAUGAAGGAG 3' **|*||||||:*|||||||* miRNA: 3' AGG-CCACCUU-ACUUCCU- 5'	no
dre-miR-205-5p	rna-XM_010731927.3	gene-LOC104919834	LOC104919834	post-GPI attachment to proteins factor 2-like, transcript variant X2	66	87	161	-25.3	miRNA: 3' gucugaggcCACCUUACUUCCu 5' *:*:*****||||:|||||||| target: 5' agaggaggaGTGGGATGAAGGa 3'	47	68	-30.9	0.0003	target: 5' UUGCUCCUGCUCAAGAGGAGGAGUGGGAUGAAGGAC 3' **:||||*************|*||||:||||||||* miRNA: 3' --UGAGG-------------C-CACCUUACUUCCU- 5'	no
dre-miR-205-5p	rna-XM_019275382.2	gene-LOC104920306	LOC104920306	smoothelin, transcript variant X8	79	100	164	-29.48	miRNA: 3' guCUGAGGCCACCUUACUUCCu 5' ||||||:****||||||||||: target: 5' caGACTTAATGGGAATGAAGGg 3'	78	99	-32.7	0.002015	target: 5' UUAAUGGGAAUGAAGGGG 3' |:****||||||||||:* miRNA: 3' AGGCCACCUUACUUCCU- 5'	no
dre-miR-205-5p	rna-XM_027288638.1	gene-fam110a	fam110a	family with sequence similarity 110 member A, transcript variant X7	321	343	171	-28.05	miRNA: 3' guCUGAGGCCAC-CUUACUUCCu 5' **||:*:|||||*|:|||||||* target: 5' atGATGTCGGTGAGGATGAAGGc 3'	306	327	-31	0.008203	target: 5' UUGGUAUAAAUGAUGUCGGUGAGGAUGAAGGC 3' |**************:|||||*|:|||||||* miRNA: 3' A--------------GGCCAC-CUUACUUCCU 5'	no
dre-miR-205-5p	rna-XM_010750322.3	gene-LOC104934615	LOC104934615	cytochrome P450 27C1, transcript variant X2	550	571	172	-29.99	miRNA: 3' guCUGAGGCCACCUUACUUCCu 5' *|||||*:|**||||||||||| target: 5' aaGACTGTGAAGGAATGAAGGa 3'	550	571	-31.8	0.002563	target: 5' GUGAAGGAAUGAAGGAC 3' *:|**|||||||||||* miRNA: 3' GGCCACCUUACUUCCU- 5'	no
dre-miR-205-5p	rna-XM_010738686.3	gene-LOC104925135	LOC104925135	tumor suppressor candidate 2, transcript variant X1	202	224	175	-31.19	miRNA: 3' guCUGAGGCCACCU-UACUUCCu 5' *:|*|*||||||||*|||||||: target: 5' agGTCACCGGTGGAGATGAAGGg 3'	195	216	-33.3	0.001159	target: 5' UAGGUCACCGGUGGAGAUGAAGGGU 3' |******||||||||*|||||||:* miRNA: 3' A------GGCCACCU-UACUUCCU- 5'	no
dre-miR-205-5p	rna-XM_019275408.2	gene-LOC104920306	LOC104920306	smoothelin, transcript variant X8	79	100	164	-29.48	miRNA: 3' guCUGAGGCCACCUUACUUCCu 5' ||||||:****||||||||||: target: 5' caGACTTAATGGGAATGAAGGg 3'	78	99	-32.7	0.002015	target: 5' UUAAUGGGAAUGAAGGGG 3' |:****||||||||||:* miRNA: 3' AGGCCACCUUACUUCCU- 5'	no
dre-miR-205-5p	rna-XM_027289682.1	gene-ap3b2	ap3b2	adaptor related protein complex 3 subunit beta 2, transcript variant X9	598	619	168	-25.99	miRNA: 3' gucugaGGCCACCUUACUUCCu 5' ::****|:|*|||||||||||| target: 5' tgccagCTGTTGGAATGAAGGa 3'	591	612	-30.1	0.009193	target: 5' CUGCCAGCUGUUGGAAUGAAGGAC 3' |:|********||||||||||||* miRNA: 3' GGCC-------ACCUUACUUCCU- 5'	no
dre-miR-205-5p	rna-XM_010743696.3	gene-fam110a	fam110a	family with sequence similarity 110 member A, transcript variant X7	321	343	171	-28.05	miRNA: 3' guCUGAGGCCAC-CUUACUUCCu 5' **||:*:|||||*|:|||||||* target: 5' atGATGTCGGTGAGGATGAAGGc 3'	306	327	-31	0.008203	target: 5' UUGGUAUAAAUGAUGUCGGUGAGGAUGAAGGC 3' |**************:|||||*|:|||||||* miRNA: 3' A--------------GGCCAC-CUUACUUCCU 5'	no
dre-miR-205-5p	rna-XM_010755503.3	gene-LOC104939027	LOC104939027	RNA-binding protein 38	482	508	161	-29.5	miRNA: 3' guCUG--AGGC--CACCU-UACUUCCu 5' |||||**||:|**|||||*|||||||: target: 5' caGACTATCTGGAGTGGATATGAAGGg 3'	481	502	-31.5	0.00588	target: 5' UAUCUGGAGUGGAUAUGAAGGGC 3' **||:||**||||*|||||||:* miRNA: 3' --AGGCC--ACCU-UACUUCCU- 5'	no
dre-miR-205-5p	rna-XM_019276872.2	gene-LOC104938279	LOC104938279	scavenger receptor cysteine-rich type 1 protein M130, transcript variant X3	36	57	160	-23.13	miRNA: 3' guCUGAGGCCACCUUACUUCCu 5' |*||*||*|*||||:||||||: target: 5' ctGAATCAGATGGAGTGAAGGg 3'	29	50	-30	0.001623	target: 5' UCUGAAUCAGAUGGAGUGAAGGGA 3' ||:|*******||||:||||||:* miRNA: 3' AGGCC------ACCUUACUUCCU- 5'	no
dre-miR-205-5p	rna-XM_010738687.3	gene-LOC104925135	LOC104925135	tumor suppressor candidate 2, transcript variant X1	202	224	175	-31.19	miRNA: 3' guCUGAGGCCACCU-UACUUCCu 5' *:|*|*||||||||*|||||||: target: 5' agGTCACCGGTGGAGATGAAGGg 3'	195	216	-33.3	0.001159	target: 5' UAGGUCACCGGUGGAGAUGAAGGGU 3' |******||||||||*|||||||:* miRNA: 3' A------GGCCACCU-UACUUCCU- 5'	no
dre-miR-205-5p	rna-XM_027289681.1	gene-ap3b2	ap3b2	adaptor related protein complex 3 subunit beta 2, transcript variant X9	598	619	168	-25.99	miRNA: 3' gucugaGGCCACCUUACUUCCu 5' ::****|:|*|||||||||||| target: 5' tgccagCTGTTGGAATGAAGGa 3'	591	612	-30.1	0.009193	target: 5' CUGCCAGCUGUUGGAAUGAAGGAC 3' |:|********||||||||||||* miRNA: 3' GGCC-------ACCUUACUUCCU- 5'	no
dre-miR-205-5p	rna-XM_019278106.2	gene-hinfp	hinfp	histone H4 transcription factor, transcript variant X2	36	59	166	-31.27	miRNA: 3' guCUG-AGGCCAC-CUUACUUCCu 5' *||||*|:|*|||*|:|||||||| target: 5' gaGACGTTCCGTGTGGATGAAGGa 3'	36	57	-33.7	9.8e-05	target: 5' UUCCGUGUGGA-UGAAGGAU 3' *||||*|||||*|||||||* miRNA: 3' -AGGC-CACCUUACUUCCU- 5'	no
dre-miR-205-5p	rna-XM_019253337.2	gene-fam110a	fam110a	family with sequence similarity 110 member A, transcript variant X7	321	343	171	-28.05	miRNA: 3' guCUGAGGCCAC-CUUACUUCCu 5' **||:*:|||||*|:|||||||* target: 5' atGATGTCGGTGAGGATGAAGGc 3'	306	327	-31	0.008203	target: 5' UUGGUAUAAAUGAUGUCGGUGAGGAUGAAGGC 3' |**************:|||||*|:|||||||* miRNA: 3' A--------------GGCCAC-CUUACUUCCU 5'	no
dre-miR-205-5p	rna-XM_027291790.1	gene-sts	sts	steroid sulfatase, transcript variant X1	163	185	170	-24.61	miRNA: 3' gucUGAGGCCACCU-UACUUCCu 5' *|*|*|||*|||||*|||||||: target: 5' gaaAATCCAGTGGAGATGAAGGg 3'	160	181	-32.7	0.001309	target: 5' AAUCCAGUGGAGAUGAAGGGA 3' **|||*|||||*|||||||:* miRNA: 3' --AGGCCACCU-UACUUCCU- 5'	no
dre-miR-205-5p	rna-XM_019278934.2	gene-alg12	alg12	ALG12, alpha-1,6-mannosyltransferase	2	25	163	-25.55	miRNA: 3' guCUGAGGCCAC--CUUACUUCCu 5' |:||*|**||||**|||||||||| target: 5' cgGAATGAGGTGTTGAATGAAGGa 3'	1	22	-28.6	0.002387	target: 5' UGAGGUGUUGAAUGAAGGAG 3' |**||||**||||||||||* miRNA: 3' AGGCCAC--CUUACUUCCU- 5'	no
dre-miR-205-5p	rna-XM_010729393.3	gene-frmd5	frmd5	FERM domain containing 5, transcript variant X1	52	73	164	-31.58	miRNA: 3' guCUGAGGCCACCUUACUUCCu 5' *:||||||||*|*:|||:|||: target: 5' agGACTCCGGAGTGATGGAGGg 3'	52	73	-34	7e-05	target: 5' CCGGAGUGAUGGAGGGC 3' ||||*|*:|||:|||:* miRNA: 3' GGCCACCUUACUUCCU- 5'	no
dre-miR-205-5p	rna-XM_027289679.1	gene-ap3b2	ap3b2	adaptor related protein complex 3 subunit beta 2, transcript variant X9	598	619	168	-25.99	miRNA: 3' gucugaGGCCACCUUACUUCCu 5' ::****|:|*|||||||||||| target: 5' tgccagCTGTTGGAATGAAGGa 3'	591	612	-30.1	0.009193	target: 5' CUGCCAGCUGUUGGAAUGAAGGAC 3' |:|********||||||||||||* miRNA: 3' GGCC-------ACCUUACUUCCU- 5'	no
dre-miR-205-5p	rna-XM_027279756.1	gene-LOC104925135	LOC104925135	tumor suppressor candidate 2, transcript variant X1	202	224	175	-31.19	miRNA: 3' guCUGAGGCCACCU-UACUUCCu 5' *:|*|*||||||||*|||||||: target: 5' agGTCACCGGTGGAGATGAAGGg 3'	195	216	-33.3	0.001159	target: 5' UAGGUCACCGGUGGAGAUGAAGGGU 3' |******||||||||*|||||||:* miRNA: 3' A------GGCCACCU-UACUUCCU- 5'	no
dre-miR-205-5p	rna-XM_027288639.1	gene-fam110a	fam110a	family with sequence similarity 110 member A, transcript variant X7	321	343	171	-28.05	miRNA: 3' guCUGAGGCCAC-CUUACUUCCu 5' **||:*:|||||*|:|||||||* target: 5' atGATGTCGGTGAGGATGAAGGc 3'	306	327	-31	0.008203	target: 5' UUGGUAUAAAUGAUGUCGGUGAGGAUGAAGGC 3' |**************:|||||*|:|||||||* miRNA: 3' A--------------GGCCAC-CUUACUUCCU 5'	no
dre-miR-205-5p	rna-XM_010750395.3	gene-LOC104934672	LOC104934672	oligodendrocyte-myelin glycoprotein	652	672	166	-37.45	miRNA: 3' guCUGAGGCCACCUUACUUCCu 5' *||:||||*|||||:||||||: target: 5' aaGGCTCC-GTGGAGTGAAGGg 3'	652	673	-38.6	0.000189	target: 5' CC-GUGGAGUGAAGGGG 3' ||*|||||:||||||:* miRNA: 3' GGCCACCUUACUUCCU- 5'	no
dre-miR-205-5p	rna-XM_027279755.1	gene-LOC104925135	LOC104925135	tumor suppressor candidate 2, transcript variant X1	202	224	175	-31.19	miRNA: 3' guCUGAGGCCACCU-UACUUCCu 5' *:|*|*||||||||*|||||||: target: 5' agGTCACCGGTGGAGATGAAGGg 3'	195	216	-33.3	0.001159	target: 5' UAGGUCACCGGUGGAGAUGAAGGGU 3' |******||||||||*|||||||:* miRNA: 3' A------GGCCACCU-UACUUCCU- 5'	no
dre-miR-205-5p	rna-XM_027289678.1	gene-ap3b2	ap3b2	adaptor related protein complex 3 subunit beta 2, transcript variant X9	598	619	168	-25.99	miRNA: 3' gucugaGGCCACCUUACUUCCu 5' ::****|:|*|||||||||||| target: 5' tgccagCTGTTGGAATGAAGGa 3'	591	612	-30.1	0.009193	target: 5' CUGCCAGCUGUUGGAAUGAAGGAC 3' |:|********||||||||||||* miRNA: 3' GGCC-------ACCUUACUUCCU- 5'	no
dre-miR-205-5p	rna-XM_019272281.2	gene-frmd5	frmd5	FERM domain containing 5, transcript variant X1	52	73	164	-31.58	miRNA: 3' guCUGAGGCCACCUUACUUCCu 5' *:||||||||*|*:|||:|||: target: 5' agGACTCCGGAGTGATGGAGGg 3'	52	73	-34	7e-05	target: 5' CCGGAGUGAUGGAGGGC 3' ||||*|*:|||:|||:* miRNA: 3' GGCCACCUUACUUCCU- 5'	no
dre-miR-216b	rna-XM_019268755.2	gene-LOC104931234	LOC104931234	centrin-1	3	27	170	-23.42	miRNA: 3' agUGU--CAAC-GGACGUCUCUAAu 5' |:|||**||||*:|||:|||||||* target: 5' ttACAATGTTGATCTGTAGAGATTc 3'	2	23	-28.4	0.000492	target: 5' AUGUUGAUCUGUAGAGAUUC 3' **||||*:|||:|||||||* miRNA: 3' --CAAC-GGACGUCUCUAAU 5'	no
dre-miR-216b	rna-XM_010747004.3	gene-LOC104931890	LOC104931890	inner ear-specific collagen, transcript variant X1	2373	2394	184	-29.39	miRNA: 3' agUGUCAACGGACGUCUCUAAu 5' |*||||||**|||||||||||| target: 5' tgACAGTTAACTGCAGAGATTa 3'	2372	2393	-32.5	0.007401	target: 5' UUAACUGCAGAGAUUAA 3' ||**||||||||||||* miRNA: 3' AACGGACGUCUCUAAU- 5'	no
dre-miR-216b	rna-XM_019267777.2	gene-LOC104935848	LOC104935848	glutamate receptor-interacting protein 2, transcript variant X3	323	346	164	-25.35	miRNA: 3' agUGUCA-AC--GGACGUCUCUAAu 5' *||||||*||**||||*|||||||* target: 5' ccACAGTGTGGTCCTG-AGAGATTt 3'	323	344	-28.3	0.004563	target: 5' UGUGGUCCUG-AGAGAUUU 3' |***|*||||*|||||||* miRNA: 3' AA--C-GGACGUCUCUAAU 5'	no
dre-miR-216b	rna-XM_010751423.3	gene-trip11	trip11	thyroid hormone receptor interactor 11	624	647	175	-26.03	miRNA: 3' agUGUCAACGGACG--UCUCUAAu 5' **:||||*||||||**|||||||* target: 5' caGCAGTAGCCTGCGTAGAGATTt 3'	625	646	-31.6	0.0045	target: 5' UAGCCUGCGUAGAGAUUU 3' |*||||||**|||||||* miRNA: 3' AACGGACG--UCUCUAAU 5'	no
dre-miR-216b	rna-XM_027275220.1	gene-dact1	dact1	dishevelled binding antagonist of beta catenin 1, transcript variant X1	273	298	174	-27.64	miRNA: 3' agUG-UCAAC---GGACGUCUCUAAu 5' |*||*|||||***||||||||||||* target: 5' tgACGAGTTGTGACCTGCAGAGATTt 3'	274	295	-30	0.005872	target: 5' GUUGUGACCUGCAGAGAUUU 3' ||||***||||||||||||* miRNA: 3' CAAC---GGACGUCUCUAAU 5'	no
dre-miR-216b	rna-XM_019277498.2	gene-cxviih8orf82	cxviih8orf82	chromosome XVII C8orf82 homolog	322	344	174	-28.73	miRNA: 3' aguGU-CAACGGACGUCUCUAAu 5' *:*||*|*||:|||||||||||* target: 5' attCATGGTGTCTGCAGAGATTt 3'	323	344	-33.4	0.000332	target: 5' G-UGUCUGCAGAGAUUU 3' |*||:|||||||||||* miRNA: 3' CAACGGACGUCUCUAAU 5'	no
dre-miR-216b	rna-XM_027286645.1	gene-LOC104931890	LOC104931890	inner ear-specific collagen, transcript variant X1	2373	2394	184	-29.39	miRNA: 3' agUGUCAACGGACGUCUCUAAu 5' |*||||||**|||||||||||| target: 5' tgACAGTTAACTGCAGAGATTa 3'	2372	2393	-32.5	0.007401	target: 5' UUAACUGCAGAGAUUAA 3' ||**||||||||||||* miRNA: 3' AACGGACGUCUCUAAU- 5'	no
dre-miR-216b	rna-XM_010744482.3	gene-atp5f1e	atp5f1e	ATP synthase F1 subunit epsilon	90	113	160	-21.58	miRNA: 3' agugUCAAC-GGAC-GUCUCUAAu 5' *:**||*||*||||*:|||||||: target: 5' atcaAGATGACCTGTTAGAGATTg 3'	90	111	-24.6	0.008205	target: 5' GAUGACCUGUUAGAGAUUGG 3' |*||*||||*:|||||||:* miRNA: 3' CAAC-GGAC-GUCUCUAAU- 5'	no
dre-miR-216b	rna-XM_010738708.3	gene-tbx21	tbx21	T-box 21	334	355	168	-32.32	miRNA: 3' agUGUCAACGGACGUCUCUAAu 5' |*||||**||||||||:||||: target: 5' tgACAGAGGCCTGCAGGGATTg 3'	335	356	-35.5	0.003096	target: 5' AGGCCUGCAGGGAUUGU 3' **||||||||:||||:* miRNA: 3' AACGGACGUCUCUAAU- 5'	no
dre-miR-216b	rna-XM_019258717.2	gene-LOC104926470	LOC104926470	potassium voltage-gated channel subfamily H member 4	168	189	166	-24.43	miRNA: 3' agugucaaCGGACGUCUCUAAu 5' |:**|***|:|||||||||||| target: 5' tttaaaagGTCTGCAGAGATTa 3'	175	196	-28.3	0.005739	target: 5' -GGUCUGCAGAGAUUAU 3' **|:||||||||||||* miRNA: 3' AACGGACGUCUCUAAU- 5'	no
dre-miR-216b	rna-XM_019264203.2	gene-LOC104923129	LOC104923129	ras-related protein Rab-25	4	25	164	-21.4	miRNA: 3' agUGUCAACGGACGUCUCUAAu 5' **|::*|**||||:|||||||| target: 5' gaATGCTGCCCTGTAGAGATTa 3'	9	30	-26.5	0.008146	target: 5' CUGCCCUGUAGAGAUUAU 3' *||*||||:||||||||* miRNA: 3' AAC-GGACGUCUCUAAU- 5'	no
dre-miR-216b	rna-XM_010757059.3	gene-fam185a	fam185a	family with sequence similarity 185 member A	973	993	167	-22.85	miRNA: 3' aguguCAACGGACGUCUCUAAu 5' *|*:*||||*:||||||||||| target: 5' actttGTTG-TTGCAGAGATTa 3'	971	992	-30	0.007822	target: 5' UGUUG-UUGCAGAGAUUAA 3' *||||*:|||||||||||* miRNA: 3' -CAACGGACGUCUCUAAU- 5'	no
dre-miR-216b	rna-XM_010751949.3	gene-LOC104936016	LOC104936016	olfactory receptor 142	135	156	172	-22.95	miRNA: 3' agUGUCAACGGACGUCUCUAAu 5' |:||**|||::||:|||||||* target: 5' ttACTTTTGTTTGTAGAGATTt 3'	121	142	-29.6	0.00121	target: 5' UUACUUUGUUACUUUUGUUUGUAGAGAUUU 3' |**************||::||:|||||||* miRNA: 3' A--------------ACGGACGUCUCUAAU 5'	no
dre-miR-216b	rna-XM_027275219.1	gene-dact1	dact1	dishevelled binding antagonist of beta catenin 1, transcript variant X1	273	298	174	-27.64	miRNA: 3' agUG-UCAAC---GGACGUCUCUAAu 5' |*||*|||||***||||||||||||* target: 5' tgACGAGTTGTGACCTGCAGAGATTt 3'	274	295	-30	0.005872	target: 5' GUUGUGACCUGCAGAGAUUU 3' ||||***||||||||||||* miRNA: 3' CAAC---GGACGUCUCUAAU 5'	no
dre-miR-217	rna-XM_010743254.3	gene-LOC104928884	LOC104928884	syntaxin-11	450	470	174	-28.48	miRNA: 3' ggUUAGUCAAGGACUACGUCAu 5' *||||*:|*||||||||||||| target: 5' acAAT-GGCTCCTGATGCAGTa 3'	450	471	-31.5	0.002822	target: 5' GGCUCCUGAUGCAGUAA 3' :|*|||||||||||||* miRNA: 3' UCAAGGACUACGUCAU- 5'	no
dre-miR-217	rna-XM_027283647.1	gene-LOC104926672	LOC104926672	transcription elongation factor 1 homolog, transcript variant X3	286	310	163	-25.22	miRNA: 3' gguuagUCAAGGA---CUACGUCAu 5' :|****|||||||***||||||||: target: 5' tctcagAGTTCCTCTAGATGCAGTg 3'	281	302	-29.2	0.009063	target: 5' CUCAGAGUUCCUCUAGAUGCAGUGU 3' *****|||||||***||||||||:* miRNA: 3' -----UCAAGGA---CUACGUCAU- 5'	no
dre-miR-217	rna-XM_027275101.1	gene-LOC104922155	LOC104922155	gamma-aminobutyric acid receptor subunit rho-1, transcript variant X2	353	374	179	-28.45	miRNA: 3' gguUAGUCAAGGACUACGUCAu 5' |**:|||||||:*||||||||: target: 5' catGTCAGTTCTCGATGCAGTg 3'	352	373	-32.4	0.00153	target: 5' CAGUUCUCGAUGCAGUGA 3' ||||||:*||||||||:* miRNA: 3' GUCAAGGACUACGUCAU- 5'	no
dre-miR-217	rna-XM_010751341.3	gene-slc39a14	slc39a14	solute carrier family 39 member 14, transcript variant X2	196	218	168	-27.74	miRNA: 3' gguuaGUCAA-GGACUACGUCAu 5' *|:**|||||*||*||||||||| target: 5' acgcgCAGTTCCCAGATGCAGTa 3'	196	217	-32.4	0.007679	target: 5' AGUUCCCAGAUGCAGUAA 3' ||||||**|||||||||* miRNA: 3' UCAAGGA-CUACGUCAU- 5'	no
dre-miR-217	rna-XM_027277100.1	gene-stambpl1	stambpl1	STAM binding protein like 1, transcript variant X2	90	111	164	-29.18	miRNA: 3' ggUUAGUCAAGGACUACGUCAu 5' :*||||||||:|||*||||||: target: 5' tgAATCAGTTTCTGCTGCAGTg 3'	91	112	-32.4	0.000131	target: 5' AGUUUCUGCUGCAGUGA 3' ||||:|||*||||||:* miRNA: 3' UCAAGGACUACGUCAU- 5'	no
dre-miR-217	rna-XM_019271048.2	gene-setd2	setd2	SET domain containing 2, transcript variant X4	1421	1444	169	-27.49	miRNA: 3' gguuAGUC--AAGGACUACGUCAu 5' |*:*||||***||||||||||||* target: 5' cagcTCAGCCCTCCTGATGCAGTt 3'	1418	1439	-33.3	0.002908	target: 5' UCAGCCCUCCUGAUGCAGUU 3' ||||***||||||||||||* miRNA: 3' AGUCA--AGGACUACGUCAU 5'	no
dre-miR-217	rna-XM_010730568.3	gene-ddx28	ddx28	DEAD-box helicase 28	371	389	160	-26.32	miRNA: 3' ggUUAGUCAAGGACUACGUCAu 5' :||||||****||||||||||| target: 5' tcAATCA---ACTGATGCAGTa 3'	370	391	-29.5	0.002962	target: 5' CAA---CUGAUGCAGUAU 3' ||****|||||||||||* miRNA: 3' GUCAAGGACUACGUCAU- 5'	no
dre-miR-217	rna-XM_010747767.3	gene-ankrd44	ankrd44	ankyrin repeat domain 44, transcript variant X1	3680	3701	187	-32.65	miRNA: 3' gguUAGUCAAGGACUACGUCAu 5' |**|*||||||||||||||||| target: 5' catACCAGTTCCTGATGCAGTa 3'	3675	3696	-36.1	0.002646	target: 5' CCAGUUCCUGAUGCAGUAC 3' *|||||||||||||||||* miRNA: 3' -GUCAAGGACUACGUCAU- 5'	no
dre-miR-217	rna-XM_010756909.3	gene-setd2	setd2	SET domain containing 2, transcript variant X4	1421	1444	169	-27.49	miRNA: 3' gguuAGUC--AAGGACUACGUCAu 5' |*:*||||***||||||||||||* target: 5' cagcTCAGCCCTCCTGATGCAGTt 3'	1418	1439	-33.3	0.002908	target: 5' UCAGCCCUCCUGAUGCAGUU 3' ||||***||||||||||||* miRNA: 3' AGUCA--AGGACUACGUCAU 5'	no
dre-miR-217	rna-XM_019271064.2	gene-setd2	setd2	SET domain containing 2, transcript variant X4	1421	1444	169	-27.49	miRNA: 3' gguuAGUC--AAGGACUACGUCAu 5' |*:*||||***||||||||||||* target: 5' cagcTCAGCCCTCCTGATGCAGTt 3'	1418	1439	-33.3	0.002908	target: 5' UCAGCCCUCCUGAUGCAGUU 3' ||||***||||||||||||* miRNA: 3' AGUCA--AGGACUACGUCAU 5'	no
dre-miR-217	rna-XM_010756911.3	gene-setd2	setd2	SET domain containing 2, transcript variant X4	1421	1444	169	-27.49	miRNA: 3' gguuAGUC--AAGGACUACGUCAu 5' |*:*||||***||||||||||||* target: 5' cagcTCAGCCCTCCTGATGCAGTt 3'	1418	1439	-33.3	0.002908	target: 5' UCAGCCCUCCUGAUGCAGUU 3' ||||***||||||||||||* miRNA: 3' AGUCA--AGGACUACGUCAU 5'	no
dre-miR-217	rna-XM_019258818.2	gene-harbi1	harbi1	harbinger transposase derived 1	23	44	167	-23.55	miRNA: 3' gguuaguCAAGGACUACGUCAu 5' *|:****|||*||||||||||* target: 5' acgcggtGTTGCTGATGCAGTt 3'	19	40	-26.4	0.006245	target: 5' GCGGUGUUGCUGAUGCAGUU 3' *|:||**|*||||||||||* miRNA: 3' -GUCA--AGGACUACGUCAU 5'	no
dre-miR-217	rna-XM_019257874.2	gene-txnrd1	txnrd1	thioredoxin reductase 1, transcript variant X3	597	618	180	-32.45	miRNA: 3' gguuagUCAAGGACUACGUCAu 5' ******|||||||||||||||* target: 5' ggccagAGTTCCTGATGCAGTc 3'	598	619	-34.2	0.002409	target: 5' -AGUUCCUGAUGCAGUC 3' *|||||||||||||||* miRNA: 3' GUCAAGGACUACGUCAU 5'	no
dre-miR-217	rna-XM_019263540.2	gene-slc39a14	slc39a14	solute carrier family 39 member 14, transcript variant X2	196	218	168	-27.74	miRNA: 3' gguuaGUCAA-GGACUACGUCAu 5' *|:**|||||*||*||||||||| target: 5' acgcgCAGTTCCCAGATGCAGTa 3'	196	217	-32.4	0.007679	target: 5' AGUUCCCAGAUGCAGUAA 3' ||||||**|||||||||* miRNA: 3' UCAAGGA-CUACGUCAU- 5'	no
dre-miR-217	rna-XM_027277102.1	gene-stambpl1	stambpl1	STAM binding protein like 1, transcript variant X2	139	160	164	-29.18	miRNA: 3' ggUUAGUCAAGGACUACGUCAu 5' :*||||||||:|||*||||||: target: 5' tgAATCAGTTTCTGCTGCAGTg 3'	140	161	-32.4	0.000198	target: 5' AGUUUCUGCUGCAGUGA 3' ||||:|||*||||||:* miRNA: 3' UCAAGGACUACGUCAU- 5'	no
dre-miR-217	rna-XM_027275102.1	gene-LOC104922155	LOC104922155	gamma-aminobutyric acid receptor subunit rho-1, transcript variant X2	353	374	179	-28.45	miRNA: 3' gguUAGUCAAGGACUACGUCAu 5' |**:|||||||:*||||||||: target: 5' catGTCAGTTCTCGATGCAGTg 3'	352	373	-32.4	0.00153	target: 5' CAGUUCUCGAUGCAGUGA 3' ||||||:*||||||||:* miRNA: 3' GUCAAGGACUACGUCAU- 5'	no
dre-miR-217	rna-XM_010747768.3	gene-ankrd44	ankrd44	ankyrin repeat domain 44, transcript variant X1	3811	3832	187	-32.65	miRNA: 3' gguUAGUCAAGGACUACGUCAu 5' |**|*||||||||||||||||| target: 5' catACCAGTTCCTGATGCAGTa 3'	3806	3827	-36.1	0.002776	target: 5' CCAGUUCCUGAUGCAGUAC 3' *|||||||||||||||||* miRNA: 3' -GUCAAGGACUACGUCAU- 5'	no
dre-miR-217	rna-XM_019263541.2	gene-slc39a14	slc39a14	solute carrier family 39 member 14, transcript variant X2	196	218	168	-27.74	miRNA: 3' gguuaGUCAA-GGACUACGUCAu 5' *|:**|||||*||*||||||||| target: 5' acgcgCAGTTCCCAGATGCAGTa 3'	196	217	-32.4	0.007679	target: 5' AGUUCCCAGAUGCAGUAA 3' ||||||**|||||||||* miRNA: 3' UCAAGGA-CUACGUCAU- 5'	no
dre-miR-217	rna-XM_027286634.1	gene-LOC104929041	LOC104929041	hypothetical protein, transcript variant X2	18	39	168	-21.72	miRNA: 3' gguuagUCAAGGACUACGUCAu 5' |::|**|||*:||||||||||* target: 5' ctgaagAGTCTCTGATGCAGTc 3'	17	38	-27	0.000334	target: 5' GAGUCUCUGAUGCAGUC 3' *|||*:||||||||||* miRNA: 3' GUCAAGGACUACGUCAU 5'	no
dre-miR-217	rna-XM_010745333.3	gene-LOC104930527	LOC104930527	retinaldehyde-binding protein 1	469	490	164	-25.11	miRNA: 3' gguuagUCAAGGACUACGUCAu 5' ***:**|*|*|||||||||||: target: 5' agcgggATTCCCTGATGCAGTg 3'	464	485	-27.7	0.009518	target: 5' GCGGGAUUCCCUGAUGCAGUGC 3' *|:|*****|||||||||||:* miRNA: 3' -GUCAA---GGACUACGUCAU- 5'	no
dre-miR-217	rna-XM_027283648.1	gene-LOC104926672	LOC104926672	transcription elongation factor 1 homolog, transcript variant X3	286	310	163	-25.22	miRNA: 3' gguuagUCAAGGA---CUACGUCAu 5' :|****|||||||***||||||||: target: 5' tctcagAGTTCCTCTAGATGCAGTg 3'	281	302	-29.2	0.009063	target: 5' CUCAGAGUUCCUCUAGAUGCAGUGU 3' *****|||||||***||||||||:* miRNA: 3' -----UCAAGGA---CUACGUCAU- 5'	no
dre-miR-217	rna-XM_019274217.2	gene-LOC104926672	LOC104926672	transcription elongation factor 1 homolog, transcript variant X3	286	310	163	-25.22	miRNA: 3' gguuagUCAAGGA---CUACGUCAu 5' :|****|||||||***||||||||: target: 5' tctcagAGTTCCTCTAGATGCAGTg 3'	281	302	-29.2	0.009063	target: 5' CUCAGAGUUCCUCUAGAUGCAGUGU 3' *****|||||||***||||||||:* miRNA: 3' -----UCAAGGA---CUACGUCAU- 5'	no
dre-miR-217	rna-XM_027272579.1	gene-LOC104932991	LOC104932991	serine/threonine-protein kinase pim-3	119	142	163	-25.08	miRNA: 3' ggUUAGU--CAAGGACUACGUCAu 5' *:::|||**||||**||||||||: target: 5' gtGGTCAGCGTTCAGGATGCAGTg 3'	120	141	-27.2	0.006388	target: 5' AGCGUUCAGGAUGCAGUGG 3' ||**|:|**||||||||:* miRNA: 3' UCA-AGGA-CUACGUCAU- 5'	no
dre-miR-217	rna-XM_010747766.3	gene-ankrd44	ankrd44	ankyrin repeat domain 44, transcript variant X1	3680	3701	187	-32.65	miRNA: 3' gguUAGUCAAGGACUACGUCAu 5' |**|*||||||||||||||||| target: 5' catACCAGTTCCTGATGCAGTa 3'	3675	3696	-36.1	0.002646	target: 5' CCAGUUCCUGAUGCAGUAC 3' *|||||||||||||||||* miRNA: 3' -GUCAAGGACUACGUCAU- 5'	no
dre-miR-217	rna-XM_027274775.1	gene-rlf	rlf	rearranged L-myc fusion	462	484	171	-23.87	miRNA: 3' ggUUAGUCA-AGGACUACGUCAu 5' :*|||||||*|:**||||||||: target: 5' taAATCAGTGTTGGGATGCAGTg 3'	463	484	-27.8	0.009417	target: 5' AGUGUUGGGAUGCAGUGG 3' |||*::**||||||||:* miRNA: 3' UCAAGGA-CUACGUCAU- 5'	no
dre-miR-217	rna-XM_027277099.1	gene-stambpl1	stambpl1	STAM binding protein like 1, transcript variant X2	139	160	164	-29.18	miRNA: 3' ggUUAGUCAAGGACUACGUCAu 5' :*||||||||:|||*||||||: target: 5' tgAATCAGTTTCTGCTGCAGTg 3'	140	161	-32.4	0.000121	target: 5' AGUUUCUGCUGCAGUGA 3' ||||:|||*||||||:* miRNA: 3' UCAAGGACUACGUCAU- 5'	no
dre-miR-217	rna-XM_027277098.1	gene-stambpl1	stambpl1	STAM binding protein like 1, transcript variant X2	139	160	164	-29.18	miRNA: 3' ggUUAGUCAAGGACUACGUCAu 5' :*||||||||:|||*||||||: target: 5' tgAATCAGTTTCTGCTGCAGTg 3'	140	161	-32.4	0.000198	target: 5' AGUUUCUGCUGCAGUGA 3' ||||:|||*||||||:* miRNA: 3' UCAAGGACUACGUCAU- 5'	no
dre-miR-217	rna-XM_010736909.3	gene-txnrd1	txnrd1	thioredoxin reductase 1, transcript variant X3	597	618	180	-32.45	miRNA: 3' gguuagUCAAGGACUACGUCAu 5' ******|||||||||||||||* target: 5' ggccagAGTTCCTGATGCAGTc 3'	598	619	-34.2	0.002409	target: 5' -AGUUCCUGAUGCAGUC 3' *|||||||||||||||* miRNA: 3' GUCAAGGACUACGUCAU 5'	no
dre-miR-218b	rna-XM_027287282.1	gene-LOC104922107	LOC104922107	serine/threonine-protein kinase DCLK3, transcript variant X1	228	249	168	-25.66	miRNA: 3' acGUACCAAUCUAGUUCGUGUu 5' ||::||*||||||||:|||||* target: 5' tgTGTGATTAGATCAGGCACAt 3'	227	248	-32.4	0.002249	target: 5' GAUUAGAUCAGGCACAU 3' |*||||||||:|||||* miRNA: 3' CCAAUCUAGUUCGUGUU 5'	no
dre-miR-218b	rna-XM_019253592.2	gene-thap7	thap7	THAP domain containing 7, transcript variant X1	273	297	171	-25.47	miRNA: 3' acGUACCAAUC---UAGUUCGUGUu 5' |*|||||||:|***||*|||||||| target: 5' tcCATGGTTGGGAAATGAAGCACAa 3'	274	295	-28.7	0.003143	target: 5' GUUGGGAAAUGAAGCACAAG 3' |||:|:***|*||||||||* miRNA: 3' CAAUCU---AGUUCGUGUU- 5'	no
dre-miR-218b	rna-XM_019264282.2	gene-LOC104922107	LOC104922107	serine/threonine-protein kinase DCLK3, transcript variant X1	228	249	168	-25.66	miRNA: 3' acGUACCAAUCUAGUUCGUGUu 5' ||::||*||||||||:|||||* target: 5' tgTGTGATTAGATCAGGCACAt 3'	227	248	-32.4	0.002249	target: 5' GAUUAGAUCAGGCACAU 3' |*||||||||:|||||* miRNA: 3' CCAAUCUAGUUCGUGUU 5'	no
dre-miR-218b	rna-XM_010740311.3	gene-LOC104926454	LOC104926454	histone H3.v1-like, transcript variant X3	636	658	160	-24.15	miRNA: 3' acguaCCAA-UCUAGUUCGUGUu 5' |**:*||||*||||||||||:|* target: 5' tcgggGGTTAAGATCAAGCATAc 3'	633	654	-28.6	0.008333	target: 5' GGGGUUAAGAUCAAGCAUAC 3' ||*****||||||||||:|* miRNA: 3' CCAA---UCUAGUUCGUGUU 5'	no
dre-miR-218b	rna-XM_010744701.3	gene-LOC104930033	LOC104930033	homeobox protein Nkx-2.5	326	347	163	-23.12	miRNA: 3' acgUACCAAUCUAGUUCGUGUu 5' ***|*||**:|||:|||||||| target: 5' cagAGGGGGGGATTAAGCACAa 3'	322	343	-31.4	0.00172	target: 5' GAGGGGGGGAUUAAGCACAAG 3' ***||**:|||:||||||||* miRNA: 3' ---CCAAUCUAGUUCGUGUU- 5'	no
dre-miR-218b	rna-XM_019253587.2	gene-thap7	thap7	THAP domain containing 7, transcript variant X1	273	297	171	-25.47	miRNA: 3' acGUACCAAUC---UAGUUCGUGUu 5' |*|||||||:|***||*|||||||| target: 5' tcCATGGTTGGGAAATGAAGCACAa 3'	274	295	-28.7	0.003143	target: 5' GUUGGGAAAUGAAGCACAAG 3' |||:|:***|*||||||||* miRNA: 3' CAAUCU---AGUUCGUGUU- 5'	no
dre-miR-218b	rna-XM_027287283.1	gene-LOC104922107	LOC104922107	serine/threonine-protein kinase DCLK3, transcript variant X1	228	249	168	-25.66	miRNA: 3' acGUACCAAUCUAGUUCGUGUu 5' ||::||*||||||||:|||||* target: 5' tgTGTGATTAGATCAGGCACAt 3'	227	248	-32.4	0.002249	target: 5' GAUUAGAUCAGGCACAU 3' |*||||||||:|||||* miRNA: 3' CCAAUCUAGUUCGUGUU 5'	no
dre-miR-218b	rna-XM_027289487.1	gene-LOC104935520	LOC104935520	CD63 antigen, transcript variant X1	1072	1094	161	-28.34	miRNA: 3' acguACCAAUCU-AGUUCGUGUu 5' *|:*|||||||:*|||:|||||| target: 5' ggttTGGTTAGGCTCAGGCACAa 3'	1071	1092	-32.2	0.005702	target: 5' GUUAGGCUCAGGCACAAA 3' |||||:*|||:||||||* miRNA: 3' CAAUCU-AGUUCGUGUU- 5'	no
dre-miR-459-5p	rna-XM_010754788.3	gene-LOC104938400	LOC104938400	ADP-ribosylation factor 3	1186	1208	175	-27.25	miRNA: 3' guCCUA-CUUAGGAACAAUGACu 5' *:||||*||:||:*||||||||| target: 5' ggGGATGGAGTCTGTGTTACTGa 3'	1185	1206	-31.6	0.008509	target: 5' GGAGUCUGUGUUACUGAA 3' *||:||:*|||||||||* miRNA: 3' -CUUAGGAACAAUGACU- 5'	no
dre-miR-459-5p	rna-XM_010746811.3	gene-arhgap11b	arhgap11b	Rho GTPase activating protein 11B	24	45	172	-21.72	miRNA: 3' guCCUACUUAGGAACAAUGACu 5' **||*|*|:|||*||||||||| target: 5' gtGGTTTAGTCCATGTTACTGa 3'	25	46	-25.2	0.009317	target: 5' UAGUCCAUGUUACUGAA 3' *|:|||*|||||||||* miRNA: 3' CUUAGGAACAAUGACU- 5'	no
dre-miR-459-5p	rna-XM_010745027.3	gene-LOC104930282	LOC104930282	B-cell receptor CD22, transcript variant X1	28	49	160	-20.99	miRNA: 3' guccuacuuaGGAACAAUGACu 5' *:********|||||||||||| target: 5' ggtacaaccaCCTTGTTACTGa 3'	26	47	-26	0.009559	target: 5' CAACCACCUUGUUACUGAG 3' *||***||||||||||||* miRNA: 3' CUUA--GGAACAAUGACU- 5'	no
dre-miR-459-5p	rna-XM_010730145.3	gene-znf516	znf516	zinc finger protein 516, transcript variant X3	56	75	160	-20.61	miRNA: 3' gucCUACUUAGGAACAAUGACu 5' :|*||*||:**||||||||||| target: 5' tacGAGGAG--CTTGTTACTGa 3'	59	80	-24.7	0.004372	target: 5' -----CUUGUUACUGAG 3' *****|||||||||||* miRNA: 3' CUUAGGAACAAUGACU- 5'	no
dre-miR-459-5p	rna-XM_019272832.2	gene-LOC104922895	LOC104922895	phosphatidylinositol 4-phosphate 5-kinase type-1 beta, transcript variant X2	617	640	166	-25.38	miRNA: 3' gucCUACUUAGG--AACAAUGACu 5' ||*|||||||||****|||||||: target: 5' catGATGAATCCAGGGGTTACTGg 3'	616	637	-28.6	0.008018	target: 5' UGAAUCCAGGGGUUACUGGG 3' |||||||****|||||||:* miRNA: 3' ACUUAGGAA--CAAUGACU- 5'	no
dre-miR-459-5p	rna-XM_010754456.3	gene-LOC104938116	LOC104938116	neurofilament light polypeptide	710	731	184	-26.93	miRNA: 3' guCCUACUUAGGAACAAUGACu 5' **|||*||*||||||||||||: target: 5' gtGGAAGACTCCTTGTTACTGg 3'	711	732	-30.2	0.005794	target: 5' GACUCCUUGUUACUGGU 3' ||*||||||||||||:* miRNA: 3' CUUAGGAACAAUGACU- 5'	no
dre-miR-459-5p	rna-XM_019262457.2	gene-sfi1	sfi1	SFI1 centrin binding protein	525	545	169	-24.15	miRNA: 3' gucCUACUUAGGAACAAUGACu 5' *:*|:|||:|*:|||||||||| target: 5' agaGGTGAGT-TTTGTTACTGa 3'	523	544	-28.5	0.00848	target: 5' GUGAGU-UUUGUUACUGAA 3' :|||:|*:||||||||||* miRNA: 3' UACUUAGGAACAAUGACU- 5'	no
dre-miR-459-5p	rna-XM_027286932.1	gene-LOC104930282	LOC104930282	B-cell receptor CD22, transcript variant X1	28	49	160	-20.99	miRNA: 3' guccuacuuaGGAACAAUGACu 5' *:********|||||||||||| target: 5' ggtacaaccaCCTTGTTACTGa 3'	26	47	-26	0.009559	target: 5' CAACCACCUUGUUACUGAG 3' *||***||||||||||||* miRNA: 3' CUUA--GGAACAAUGACU- 5'	no
dre-miR-499-5p	rna-XM_010743771.3	gene-galk1	galk1	galactokinase 1	912	933	180	-25.01	miRNA: 3' auUUGUAGUGACGUUCAGAAUu 5' ||||*:||||||*||||||||* target: 5' taAAGGTCACTGGAAGTCTTAt 3'	911	932	-29.7	0.007957	target: 5' GUCACUGGAAGUCUUAU 3' :||||||*||||||||* miRNA: 3' UAGUGACGUUCAGAAUU 5'	no
dre-miR-499-5p	rna-XM_019257060.2	gene-LOC104924476	LOC104924476	troponin T, fast skeletal muscle isoforms-like, transcript variant X6	110	135	161	-20.15	miRNA: 3' auUUGUAG-UGA-CGU--UCAGAAUu 5' *|::||||*|||*|||**|||||||* target: 5' aaGGCATCAACTGGCAACAGTCTTAc 3'	110	131	-25.6	0.007599	target: 5' UCAACUGGCAACAGUCUUAC 3' |||****|||**|||||||* miRNA: 3' AGUGA--CGU--UCAGAAUU 5'	no
dre-miR-499-5p	rna-XM_019257059.2	gene-LOC104924476	LOC104924476	troponin T, fast skeletal muscle isoforms-like, transcript variant X6	110	135	161	-20.15	miRNA: 3' auUUGUAG-UGA-CGU--UCAGAAUu 5' *|::||||*|||*|||**|||||||* target: 5' aaGGCATCAACTGGCAACAGTCTTAc 3'	110	131	-25.6	0.007599	target: 5' UCAACUGGCAACAGUCUUAC 3' |||****|||**|||||||* miRNA: 3' AGUGA--CGU--UCAGAAUU 5'	no
dre-miR-499-5p	rna-XM_010737825.3	gene-LOC104924476	LOC104924476	troponin T, fast skeletal muscle isoforms-like, transcript variant X6	110	135	161	-20.15	miRNA: 3' auUUGUAG-UGA-CGU--UCAGAAUu 5' *|::||||*|||*|||**|||||||* target: 5' aaGGCATCAACTGGCAACAGTCTTAc 3'	110	131	-25.6	0.007599	target: 5' UCAACUGGCAACAGUCUUAC 3' |||****|||**|||||||* miRNA: 3' AGUGA--CGU--UCAGAAUU 5'	no
dre-miR-499-5p	rna-XM_010737826.3	gene-LOC104924476	LOC104924476	troponin T, fast skeletal muscle isoforms-like, transcript variant X6	110	135	161	-20.15	miRNA: 3' auUUGUAG-UGA-CGU--UCAGAAUu 5' *|::||||*|||*|||**|||||||* target: 5' aaGGCATCAACTGGCAACAGTCTTAc 3'	110	131	-25.6	0.007599	target: 5' UCAACUGGCAACAGUCUUAC 3' |||****|||**|||||||* miRNA: 3' AGUGA--CGU--UCAGAAUU 5'	no
dre-miR-499-5p	rna-XM_010737824.3	gene-LOC104924476	LOC104924476	troponin T, fast skeletal muscle isoforms-like, transcript variant X6	110	135	161	-20.15	miRNA: 3' auUUGUAG-UGA-CGU--UCAGAAUu 5' *|::||||*|||*|||**|||||||* target: 5' aaGGCATCAACTGGCAACAGTCTTAc 3'	110	131	-25.6	0.007599	target: 5' UCAACUGGCAACAGUCUUAC 3' |||****|||**|||||||* miRNA: 3' AGUGA--CGU--UCAGAAUU 5'	no
dre-miR-499-5p	rna-XM_019257058.2	gene-LOC104924476	LOC104924476	troponin T, fast skeletal muscle isoforms-like, transcript variant X6	110	135	161	-20.15	miRNA: 3' auUUGUAG-UGA-CGU--UCAGAAUu 5' *|::||||*|||*|||**|||||||* target: 5' aaGGCATCAACTGGCAACAGTCTTAc 3'	110	131	-25.6	0.007599	target: 5' UCAACUGGCAACAGUCUUAC 3' |||****|||**|||||||* miRNA: 3' AGUGA--CGU--UCAGAAUU 5'	no
dre-miR-9-5p	rna-XM_027272624.1	gene-LOC104933373	LOC104933373	voltage-dependent calcium channel subunit alpha-2/delta-4, transcript variant X1	61	82	179	-33.49	miRNA: 3' agUAUGUCGAUCUAUUGGUUUCu 5' *|||:||||*||:|:|||||||: target: 5' acATGCAGC-AGGTGACCAAAGg 3'	61	83	-35.3	0.000895	target: 5' AGC-AGGUGACCAAAGGA 3' |||*||:|:|||||||:* miRNA: 3' UCGAUCUAUUGGUUUCU- 5'	no
dre-miR-9-5p	rna-XM_019279294.2	gene-LOC104935609	LOC104935609	dual specificity protein phosphatase 18, transcript variant X3	24	43	161	-21.83	miRNA: 3' agUAUGUCGAUCUAUUGGUUUCu 5' |*||:|||||*|***|||||||| target: 5' tgATGCAGCTCG---ACCAAAGa 3'	25	47	-27	0.008501	target: 5' AGCUC---GACCAAAGAC 3' ||||****:||||||||* miRNA: 3' UCGAUCUAUUGGUUUCU- 5'	no
dre-miR-9-5p	rna-XM_010734936.3	gene-LOC104922184	LOC104922184	contactin-3	350	370	161	-20.9	miRNA: 3' agUAUGUCGAUCUAUUGGUUUCu 5' *|||||||*|**||*|||||||* target: 5' acATACAG-TCCAT-ACCAAAGt 3'	350	372	-30	0.002405	target: 5' AGUCCAUACCAAAGUAGGUGACCGAGGC 3' ||:***********|||:|:|||:|:|* miRNA: 3' UCG-----------AUCUAUUGGUUUCU 5'	no
dre-miR-9-5p	rna-XM_010751467.3	gene-LOC104935609	LOC104935609	dual specificity protein phosphatase 18, transcript variant X3	24	43	161	-21.83	miRNA: 3' agUAUGUCGAUCUAUUGGUUUCu 5' |*||:|||||*|***|||||||| target: 5' tgATGCAGCTCG---ACCAAAGa 3'	25	47	-27	0.008501	target: 5' AGCUC---GACCAAAGAC 3' ||||****:||||||||* miRNA: 3' UCGAUCUAUUGGUUUCU- 5'	no
dre-miR-9-5p	rna-XM_019267885.2	gene-timm17a	timm17a	translocase of inner mitochondrial membrane 17A	694	716	165	-25.65	miRNA: 3' agUAUGUCGAUCUAUUGGUUUCu 5' **|*||:||||*||:|||||:|| target: 5' aaAGACGGCTAAATGACCAAGGa 3'	697	719	-29.7	0.006291	target: 5' GGCUAAAUGACCAAGGAG 3' :||||*||:|||||:||* miRNA: 3' UCGAUCUAUUGGUUUCU- 5'	no
dre-miR-9-5p	rna-XM_027272626.1	gene-LOC104933373	LOC104933373	voltage-dependent calcium channel subunit alpha-2/delta-4, transcript variant X1	61	82	179	-33.49	miRNA: 3' agUAUGUCGAUCUAUUGGUUUCu 5' *|||:||||*||:|:|||||||: target: 5' acATGCAGC-AGGTGACCAAAGg 3'	61	83	-35.3	0.000895	target: 5' AGC-AGGUGACCAAAGGA 3' |||*||:|:|||||||:* miRNA: 3' UCGAUCUAUUGGUUUCU- 5'	no
dre-miR-9-5p	rna-XM_010745292.3	gene-LOC104930489	LOC104930489	PAK4-inhibitor inka2	17	40	164	-22.8	miRNA: 3' agUAUGUC-GAUCUAUUGGUUUCu 5' *::|||||*||:||*||:|||||* target: 5' atGTACAGACTGGACAATCAAAGt 3'	18	40	-26	0.00188	target: 5' AGACUGGACAAUCAAAGU 3' ||*||:||*||:|||||* miRNA: 3' UC-GAUCUAUUGGUUUCU 5'	no
dre-miR-9-5p	rna-XM_027287602.1	gene-LOC109138510	LOC109138510	lamin-B1	27	48	175	-22.67	miRNA: 3' agUAUGUCGAUCUAUUGGUUUCu 5' **|||||*||:*||:|||||||: target: 5' aaATACA-CTGTATGACCAAAGg 3'	28	50	-24.5	0.000964	target: 5' A-CUGUAUGACCAAAGGU 3' |*||:*||:|||||||:* miRNA: 3' UCGAUCUAUUGGUUUCU- 5'	no
dre-miR-9-5p	rna-XM_027272628.1	gene-LOC104933373	LOC104933373	voltage-dependent calcium channel subunit alpha-2/delta-4, transcript variant X1	61	82	179	-33.49	miRNA: 3' agUAUGUCGAUCUAUUGGUUUCu 5' *|||:||||*||:|:|||||||: target: 5' acATGCAGC-AGGTGACCAAAGg 3'	61	83	-35.3	0.000895	target: 5' AGC-AGGUGACCAAAGGA 3' |||*||:|:|||||||:* miRNA: 3' UCGAUCUAUUGGUUUCU- 5'	no
dre-miR-9-5p	rna-XM_027272620.1	gene-LOC104933373	LOC104933373	voltage-dependent calcium channel subunit alpha-2/delta-4, transcript variant X1	61	82	179	-33.49	miRNA: 3' agUAUGUCGAUCUAUUGGUUUCu 5' *|||:||||*||:|:|||||||: target: 5' acATGCAGC-AGGTGACCAAAGg 3'	61	83	-35.3	0.000895	target: 5' AGC-AGGUGACCAAAGGA 3' |||*||:|:|||||||:* miRNA: 3' UCGAUCUAUUGGUUUCU- 5'	no
dre-miR-9-5p	rna-XM_019267641.2	gene-LOC104933373	LOC104933373	voltage-dependent calcium channel subunit alpha-2/delta-4, transcript variant X1	61	82	179	-33.49	miRNA: 3' agUAUGUCGAUCUAUUGGUUUCu 5' *|||:||||*||:|:|||||||: target: 5' acATGCAGC-AGGTGACCAAAGg 3'	61	83	-35.3	0.000895	target: 5' AGC-AGGUGACCAAAGGA 3' |||*||:|:|||||||:* miRNA: 3' UCGAUCUAUUGGUUUCU- 5'	no
dre-miR-9-5p	rna-XM_019254129.2	gene-slc22a16	slc22a16	solute carrier family 22 member 16	16	38	161	-24.03	miRNA: 3' agUAUGUCGAUCUAUUGGUUUCu 5' *:|*||*|||:||*|||||:||| target: 5' gtACACTGCTGGAAAACCAGAGa 3'	13	35	-30.4	0.002894	target: 5' CACUGCUGGAAAACCAGAGAG 3' ||**|||:||*|||||:|||* miRNA: 3' GU--CGAUCUAUUGGUUUCU- 5'	no
dre-miR-9-5p	rna-XM_027272627.1	gene-LOC104933373	LOC104933373	voltage-dependent calcium channel subunit alpha-2/delta-4, transcript variant X1	61	82	179	-33.49	miRNA: 3' agUAUGUCGAUCUAUUGGUUUCu 5' *|||:||||*||:|:|||||||: target: 5' acATGCAGC-AGGTGACCAAAGg 3'	61	83	-35.3	0.000895	target: 5' AGC-AGGUGACCAAAGGA 3' |||*||:|:|||||||:* miRNA: 3' UCGAUCUAUUGGUUUCU- 5'	no
dre-miR-9-5p	rna-XM_027272625.1	gene-LOC104933373	LOC104933373	voltage-dependent calcium channel subunit alpha-2/delta-4, transcript variant X1	61	82	179	-33.49	miRNA: 3' agUAUGUCGAUCUAUUGGUUUCu 5' *|||:||||*||:|:|||||||: target: 5' acATGCAGC-AGGTGACCAAAGg 3'	61	83	-35.3	0.000895	target: 5' AGC-AGGUGACCAAAGGA 3' |||*||:|:|||||||:* miRNA: 3' UCGAUCUAUUGGUUUCU- 5'	no
dre-miR-9-5p	rna-XM_010751466.3	gene-LOC104935609	LOC104935609	dual specificity protein phosphatase 18, transcript variant X3	24	43	161	-21.83	miRNA: 3' agUAUGUCGAUCUAUUGGUUUCu 5' |*||:|||||*|***|||||||| target: 5' tgATGCAGCTCG---ACCAAAGa 3'	25	47	-27	0.008501	target: 5' AGCUC---GACCAAAGAC 3' ||||****:||||||||* miRNA: 3' UCGAUCUAUUGGUUUCU- 5'	no
dre-miR-9-5p	rna-XM_027272622.1	gene-LOC104933373	LOC104933373	voltage-dependent calcium channel subunit alpha-2/delta-4, transcript variant X1	61	82	179	-33.49	miRNA: 3' agUAUGUCGAUCUAUUGGUUUCu 5' *|||:||||*||:|:|||||||: target: 5' acATGCAGC-AGGTGACCAAAGg 3'	61	83	-35.3	0.000895	target: 5' AGC-AGGUGACCAAAGGA 3' |||*||:|:|||||||:* miRNA: 3' UCGAUCUAUUGGUUUCU- 5'	no
dre-miR-9-5p	rna-XM_027272619.1	gene-LOC104933373	LOC104933373	voltage-dependent calcium channel subunit alpha-2/delta-4, transcript variant X1	61	82	179	-33.49	miRNA: 3' agUAUGUCGAUCUAUUGGUUUCu 5' *|||:||||*||:|:|||||||: target: 5' acATGCAGC-AGGTGACCAAAGg 3'	61	83	-35.3	0.000895	target: 5' AGC-AGGUGACCAAAGGA 3' |||*||:|:|||||||:* miRNA: 3' UCGAUCUAUUGGUUUCU- 5'	no
dre-miR-9-5p	rna-XM_019278366.2	gene-LOC104924502	LOC104924502	lipoxygenase homology domain-containing protein 1	20	42	164	-24.06	miRNA: 3' aguaUGUCG-AUCUAUUGGUUUCu 5' ****:||||*||*||:|||||||| target: 5' aacaGCAGCGTA-ATGACCAAAGa 3'	23	45	-27.6	0.00354	target: 5' AGCGUAAUGACCAAAGAG 3' |||***||:||||||||* miRNA: 3' UCGAUCUAUUGGUUUCU- 5'	no
dre-miR-9-5p	rna-XM_010743791.3	gene-ttc27	ttc27	tetratricopeptide repeat domain 27	136	160	161	-23.28	miRNA: 3' aguaUGUCGA-UC-UAUUGGUUUCu 5' |***||||||*||*|||||:||||| target: 5' tgtgACAGCTGAGAATAACTAAAGa 3'	133	155	-27.2	0.00355	target: 5' GACAGCUGAGAAUAACUAAAGAU 3' *||||||*|||*||||:|||||* miRNA: 3' -UGUCGA-UCU-AUUGGUUUCU- 5'	no
dre-miR-9-5p	rna-XM_010733504.3	gene-kiaa1328	kiaa1328	KIAA1328 ortholog	4	27	164	-23.05	miRNA: 3' aguaugUCGA-UCUAUUGGUUUCu 5' **|*:*||||*:||*||||||||| target: 5' agaggaAGCTGGGAGAACCAAAGa 3'	9	31	-26.3	0.00274	target: 5' AGCUGGGAGAACCAAAGAA 3' ||||:|:**|||||||||* miRNA: 3' UCGAUCUA-UUGGUUUCU- 5'	no
dre-miR-9-5p	rna-XM_027272621.1	gene-LOC104933373	LOC104933373	voltage-dependent calcium channel subunit alpha-2/delta-4, transcript variant X1	61	82	179	-33.49	miRNA: 3' agUAUGUCGAUCUAUUGGUUUCu 5' *|||:||||*||:|:|||||||: target: 5' acATGCAGC-AGGTGACCAAAGg 3'	61	83	-35.3	0.000895	target: 5' AGC-AGGUGACCAAAGGA 3' |||*||:|:|||||||:* miRNA: 3' UCGAUCUAUUGGUUUCU- 5'	no
dre-miR-9-5p	rna-XM_027289176.1	gene-LOC104935609	LOC104935609	dual specificity protein phosphatase 18, transcript variant X3	24	43	161	-21.83	miRNA: 3' agUAUGUCGAUCUAUUGGUUUCu 5' |*||:|||||*|***|||||||| target: 5' tgATGCAGCTCG---ACCAAAGa 3'	25	47	-27	0.008501	target: 5' AGCUC---GACCAAAGAC 3' ||||****:||||||||* miRNA: 3' UCGAUCUAUUGGUUUCU- 5'	no
ola-miR-181b-3p	rna-XM_027289628.1	gene-LOC104939810	LOC104939810	uncharacterized LOC104939810, transcript variant X5	144	163	162	-21.17	miRNA: 3' acGUAAGUAGCAAGUCACUc 5' **|*|*:||*|||||||||| target: 5' atCTTGTATGGTTCAGTGAg 3'	140	159	-28.7	0.006321	target: 5' CUUGUAUGGUUCAGUGAGG 3' ****:||*||||||||||* miRNA: 3' A---GUAGCAAGUCACUC- 5'	no
ola-miR-181b-3p	rna-XM_027289624.1	gene-LOC104939810	LOC104939810	uncharacterized LOC104939810, transcript variant X5	144	163	162	-21.17	miRNA: 3' acGUAAGUAGCAAGUCACUc 5' **|*|*:||*|||||||||| target: 5' atCTTGTATGGTTCAGTGAg 3'	140	159	-28.7	0.000875	target: 5' CUUGUAUGGUUCAGUGAGG 3' ****:||*||||||||||* miRNA: 3' A---GUAGCAAGUCACUC- 5'	no
ola-miR-181b-3p	rna-XM_027289627.1	gene-LOC104939810	LOC104939810	uncharacterized LOC104939810, transcript variant X5	144	163	162	-21.17	miRNA: 3' acGUAAGUAGCAAGUCACUc 5' **|*|*:||*|||||||||| target: 5' atCTTGTATGGTTCAGTGAg 3'	140	159	-28.7	0.006321	target: 5' CUUGUAUGGUUCAGUGAGG 3' ****:||*||||||||||* miRNA: 3' A---GUAGCAAGUCACUC- 5'	no
ola-miR-181b-3p	rna-XM_027287246.1	gene-LOC104924717	LOC104924717	serine/arginine-rich splicing factor 10, transcript variant X2	575	594	162	-21.91	miRNA: 3' acGUAAGUAGCAAGUCACUc 5' **::|*|*|:|||||||||| target: 5' caTGTACTTTGTTCAGTGAg 3'	561	580	-28.2	0.007873	target: 5' UUAUUUCUCAUGUACUUUGUUCAGUGAGU 3' |:|*************|:||||||||||* miRNA: 3' AGU-------------AGCAAGUCACUC- 5'	no
ola-miR-181b-3p	rna-XM_027289625.1	gene-LOC104939810	LOC104939810	uncharacterized LOC104939810, transcript variant X5	144	163	162	-21.17	miRNA: 3' acGUAAGUAGCAAGUCACUc 5' **|*|*:||*|||||||||| target: 5' atCTTGTATGGTTCAGTGAg 3'	140	159	-28.7	0.006321	target: 5' CUUGUAUGGUUCAGUGAGG 3' ****:||*||||||||||* miRNA: 3' A---GUAGCAAGUCACUC- 5'	no
ola-miR-181b-3p	rna-XM_019268264.2	gene-LOC109140707	LOC109140707	coiled-coil domain-containing glutamate-rich protein 1	280	299	178	-30.8	miRNA: 3' acGUAAGUAGCAAGUCACUc 5' *|||||*||:|||||||||| target: 5' ggCATTGATTGTTCAGTGAg 3'	280	299	-33.2	0.000535	target: 5' GAUUGUUCAGUGAGG 3' *||:||||||||||* miRNA: 3' GUAGCAAGUCACUC- 5'	no
ola-miR-181b-3p	rna-XM_019269474.2	gene-celsr2	celsr2	cadherin EGF LAG seven-pass G-type receptor 2, transcript variant X3	940	962	169	-24.49	miRNA: 3' acGUAAGUAG---CAAGUCACUc 5' |||||||||:***|||||||||* target: 5' tgCATTCATTTCAGTTCAGTGAc 3'	939	958	-30.6	0.006868	target: 5' UCAUUUCAGUUCAGUGAC 3' ||||:***|||||||||* miRNA: 3' AGUAG---CAAGUCACUC 5'	no
ola-miR-181b-3p	rna-XM_010738162.3	gene-LOC104924717	LOC104924717	serine/arginine-rich splicing factor 10, transcript variant X2	575	594	162	-21.91	miRNA: 3' acGUAAGUAGCAAGUCACUc 5' **::|*|*|:|||||||||| target: 5' caTGTACTTTGTTCAGTGAg 3'	561	580	-28.2	0.007873	target: 5' UUAUUUCUCAUGUACUUUGUUCAGUGAGU 3' |:|*************|:||||||||||* miRNA: 3' AGU-------------AGCAAGUCACUC- 5'	no
ola-miR-181b-3p	rna-XM_027289623.1	gene-LOC104939810	LOC104939810	uncharacterized LOC104939810, transcript variant X5	144	163	162	-21.17	miRNA: 3' acGUAAGUAGCAAGUCACUc 5' **|*|*:||*|||||||||| target: 5' atCTTGTATGGTTCAGTGAg 3'	140	159	-28.7	0.006321	target: 5' CUUGUAUGGUUCAGUGAGG 3' ****:||*||||||||||* miRNA: 3' A---GUAGCAAGUCACUC- 5'	no
ola-miR-181b-3p	rna-XM_027289626.1	gene-LOC104939810	LOC104939810	uncharacterized LOC104939810, transcript variant X5	144	163	162	-21.17	miRNA: 3' acGUAAGUAGCAAGUCACUc 5' **|*|*:||*|||||||||| target: 5' atCTTGTATGGTTCAGTGAg 3'	140	159	-28.7	0.006321	target: 5' CUUGUAUGGUUCAGUGAGG 3' ****:||*||||||||||* miRNA: 3' A---GUAGCAAGUCACUC- 5'	no
ola-miR-181b-3p	rna-XM_010755376.3	gene-LOC104938918	LOC104938918	keratin, type I cytoskeletal 13	55	73	168	-21.29	miRNA: 3' acGUAAGUAGCAAGUCACUc 5' **||*||||||*|||||||* target: 5' gaCA-TCATCGCTCAGTGAt 3'	50	69	-25.3	0.00189	target: 5' ACAUCAUCGCUCAGUGAU 3' ***||||||*|||||||* miRNA: 3' ---AGUAGCAAGUCACUC 5'	no
oni-miR-194b	rna-XM_027284540.1	gene-rd3	rd3	retinal degeneration 3, GUCY2D regulator, transcript variant X1	364	385	175	-24	miRNA: 3' aggUAUACCUCUACGACAAUGu 5' ***|||||**|:|||||||||: target: 5' caaATATGTCGGTGCTGTTACg 3'	366	387	-27.6	0.008287	target: 5' UGUCGGUGCUGUUACGU 3' ||**|:|||||||||:* miRNA: 3' ACCUCUACGACAAUGU- 5'	no
oni-miR-194b	rna-XM_010738187.3	gene-arl14	arl14	ADP ribosylation factor like GTPase 14	461	483	183	-28.28	miRNA: 3' agGUAUACC-UCUACGACAAUGu 5' **|||||||*|*||||||||||| target: 5' aaCATATGGTACATGCTGTTACa 3'	462	483	-30.8	0.001921	target: 5' UGGUACAUGCUGUUACAU 3' |||***|||||||||||* miRNA: 3' ACCUC-UACGACAAUGU- 5'	no
oni-miR-194b	rna-XM_019268745.2	gene-rd3	rd3	retinal degeneration 3, GUCY2D regulator, transcript variant X1	364	385	175	-24	miRNA: 3' aggUAUACCUCUACGACAAUGu 5' ***|||||**|:|||||||||: target: 5' caaATATGTCGGTGCTGTTACg 3'	366	387	-27.6	0.008287	target: 5' UGUCGGUGCUGUUACGU 3' ||**|:|||||||||:* miRNA: 3' ACCUCUACGACAAUGU- 5'	no
oni-miR-194b	rna-XM_010734489.3	gene-ptgs2	ptgs2	prostaglandin-endoperoxide synthase 2	307	329	165	-23.04	miRNA: 3' agGUAUACCUCUA--CGACAAUGu 5' ||::|||*|||||**||||||||| target: 5' tcTGTAT-GAGATTAGCTGTTACa 3'	306	327	-28.8	0.005479	target: 5' AU-GAGAUUAGCUGUUACAA 3' ||*|||||**|||||||||* miRNA: 3' UACCUCUA--CGACAAUGU- 5'	no
oni-miR-194b	rna-XM_027284539.1	gene-rd3	rd3	retinal degeneration 3, GUCY2D regulator, transcript variant X1	364	385	175	-24	miRNA: 3' aggUAUACCUCUACGACAAUGu 5' ***|||||**|:|||||||||: target: 5' caaATATGTCGGTGCTGTTACg 3'	366	387	-27.6	0.008287	target: 5' UGUCGGUGCUGUUACGU 3' ||**|:|||||||||:* miRNA: 3' ACCUCUACGACAAUGU- 5'	no
oni-miR-194b	rna-XM_027284542.1	gene-rd3	rd3	retinal degeneration 3, GUCY2D regulator, transcript variant X1	364	385	175	-24	miRNA: 3' aggUAUACCUCUACGACAAUGu 5' ***|||||**|:|||||||||: target: 5' caaATATGTCGGTGCTGTTACg 3'	366	387	-27.6	0.008287	target: 5' UGUCGGUGCUGUUACGU 3' ||**|:|||||||||:* miRNA: 3' ACCUCUACGACAAUGU- 5'	no
oni-miR-194b	rna-XM_027280881.1	gene-LOC113746171	LOC113746171	cytoplasmic dynein 2 heavy chain 1-like	159	183	163	-21.68	miRNA: 3' agguauACCUCU---ACGACAAUGu 5' |:*:**||||||***|||||||||* target: 5' ttagctTGGAGACCTTGCTGTTACt 3'	156	177	-28.6	0.00692	target: 5' GCUUGGAGACCUUGCUGUUACU 3' ***||||||***|||||||||* miRNA: 3' ---ACCUCU---ACGACAAUGU 5'	no
oni-miR-194b	rna-XM_010738293.3	gene-LOC104924828	LOC104924828	TIR domain-containing adapter molecule 1, transcript variant X2	331	355	170	-25.52	miRNA: 3' agGU-AUACCUC--UACGACAAUGu 5' **||*||*||||**||||||||||| target: 5' ggCACTAGGGAGCAATGCTGTTACa 3'	334	355	-28.9	0.007446	target: 5' -GGAGCAAUGCUGUUACAC 3' *||||**|||||||||||* miRNA: 3' ACCUC--UACGACAAUGU- 5'	no
oni-miR-194b	rna-XM_019271954.2	gene-LOC104931464	LOC104931464	cytospin-B	646	667	160	-25.23	miRNA: 3' agGUAUACCUCUACGACAAUGu 5' **||||||*|||||:||||:|* target: 5' aaCATATGAAGATGTTGTTGCc 3'	647	668	-28.7	0.009502	target: 5' UGAAGAUGUUGUUGCC 3' ||*|||||:||||:|* miRNA: 3' ACCUCUACGACAAUGU 5'	no
oni-miR-194b	rna-XM_027284544.1	gene-rd3	rd3	retinal degeneration 3, GUCY2D regulator, transcript variant X1	364	385	175	-24	miRNA: 3' aggUAUACCUCUACGACAAUGu 5' ***|||||**|:|||||||||: target: 5' caaATATGTCGGTGCTGTTACg 3'	366	387	-27.6	0.008287	target: 5' UGUCGGUGCUGUUACGU 3' ||**|:|||||||||:* miRNA: 3' ACCUCUACGACAAUGU- 5'	no
oni-miR-194b	rna-XM_027284541.1	gene-rd3	rd3	retinal degeneration 3, GUCY2D regulator, transcript variant X1	364	385	175	-24	miRNA: 3' aggUAUACCUCUACGACAAUGu 5' ***|||||**|:|||||||||: target: 5' caaATATGTCGGTGCTGTTACg 3'	366	387	-27.6	0.008287	target: 5' UGUCGGUGCUGUUACGU 3' ||**|:|||||||||:* miRNA: 3' ACCUCUACGACAAUGU- 5'	no
oni-miR-194b	rna-XM_019256638.2	gene-LOC104927507	LOC104927507	uncharacterized LOC104927507	1019	1044	166	-28.09	miRNA: 3' agGUAUACC---UC-UACGACAAUGu 5' |:|:|||||***||*:|||||||||| target: 5' ttCGTATGGTCAAGTGTGCTGTTACa 3'	1017	1038	-30.9	0.008448	target: 5' AUGGUCAAGUGUGCUGUUACAA 3' ||||***||*:||||||||||* miRNA: 3' UACC---UC-UACGACAAUGU- 5'	no
oni-miR-194b	rna-XM_027286380.1	gene-LOC104932382	LOC104932382	hyaluronan synthase 1, transcript variant X3	279	300	184	-37.45	miRNA: 3' agGUAUACCUCUACGACAAUGu 5' |:|||||||||||||||||:|| target: 5' ttCATATGGAGATGCTGTTGCa 3'	278	299	-41	7e-06	target: 5' AUGGAGAUGCUGUUGCAC 3' ||||||||||||||:||* miRNA: 3' UACCUCUACGACAAUGU- 5'	no
oni-miR-194b	rna-XM_027280769.1	gene-LOC109142629	LOC109142629	uncharacterized LOC109142629	173	196	167	-21.04	miRNA: 3' agGUAUACCUC--UACGACAAUGu 5' **::|:|||*|**||||||||||* target: 5' aaTGTGTGGTGCCATGCTGTTACt 3'	175	196	-26.6	0.005047	target: 5' UGGUGCCAUGCUGUUACU 3' |||*|**||||||||||* miRNA: 3' ACCUC--UACGACAAUGU 5'	no
oni-miR-194b	rna-XM_019258791.2	gene-LOC104917984	LOC104917984	ras-related and estrogen-regulated growth inhibitor	1905	1930	171	-28.36	miRNA: 3' agGUAUACCUCU----ACGACAAUGu 5' **|||:|||:||****|||||||||* target: 5' caCATGTGGGGAGACCTGCTGTTACt 3'	1905	1926	-32.7	0.005055	target: 5' UGGGGAGACCUGCUGUUACU 3' |||:||****|||||||||* miRNA: 3' ACCUCU----ACGACAAUGU 5'	no
oni-miR-194b	rna-XM_027284543.1	gene-rd3	rd3	retinal degeneration 3, GUCY2D regulator, transcript variant X1	364	385	175	-24	miRNA: 3' aggUAUACCUCUACGACAAUGu 5' ***|||||**|:|||||||||: target: 5' caaATATGTCGGTGCTGTTACg 3'	366	387	-27.6	0.008287	target: 5' UGUCGGUGCUGUUACGU 3' ||**|:|||||||||:* miRNA: 3' ACCUCUACGACAAUGU- 5'	no
oni-miR-194b	rna-XM_019262071.2	gene-LOC104924828	LOC104924828	TIR domain-containing adapter molecule 1, transcript variant X2	331	355	170	-25.52	miRNA: 3' agGU-AUACCUC--UACGACAAUGu 5' **||*||*||||**||||||||||| target: 5' ggCACTAGGGAGCAATGCTGTTACa 3'	334	355	-28.9	0.007446	target: 5' -GGAGCAAUGCUGUUACAC 3' *||||**|||||||||||* miRNA: 3' ACCUC--UACGACAAUGU- 5'	no
oni-miR-194b	rna-XM_027286379.1	gene-LOC104932382	LOC104932382	hyaluronan synthase 1, transcript variant X3	279	300	184	-37.45	miRNA: 3' agGUAUACCUCUACGACAAUGu 5' |:|||||||||||||||||:|| target: 5' ttCATATGGAGATGCTGTTGCa 3'	278	299	-41	7e-06	target: 5' AUGGAGAUGCUGUUGCAC 3' ||||||||||||||:||* miRNA: 3' UACCUCUACGACAAUGU- 5'	no
oni-miR-194b	rna-XM_027286381.1	gene-LOC104932382	LOC104932382	hyaluronan synthase 1, transcript variant X3	114	135	184	-37.45	miRNA: 3' agGUAUACCUCUACGACAAUGu 5' |:|||||||||||||||||:|| target: 5' ttCATATGGAGATGCTGTTGCa 3'	113	134	-41	3e-06	target: 5' AUGGAGAUGCUGUUGCAC 3' ||||||||||||||:||* miRNA: 3' UACCUCUACGACAAUGU- 5'	no
oni-miR-725	rna-XM_010738483.3	gene-arhgap25	arhgap25	Rho GTPase activating protein 25	308	332	166	-25.8	miRNA: 3' ugCUGGUCUUU-GUU--ACUGACUu 5' *:||:||||::*|||**|||||||| target: 5' ttGATCAGAGGTCAACTTGACTGAa 3'	308	329	-28.9	0.004736	target: 5' AGAGGUCAACUUGACUGAAU 3' |||::*|||**||||||||* miRNA: 3' UCUUU-GUU--ACUGACUU- 5'	no
oni-miR-725	rna-XM_010743345.3	gene-LOC104928943	LOC104928943	phosphatidylinositol-binding clathrin assembly protein, transcript variant X16	2962	2984	168	-26.96	miRNA: 3' ugcugGUC-UUUGUUACUGACUu 5' |||**:||*|:|||||||||||| target: 5' acgtgTAGCAGACAATGACTGAa 3'	2959	2980	-33.7	0.006283	target: 5' UAGCAGACAAUGACUGAAG 3' :||*|:||||||||||||* miRNA: 3' GUC-UUUGUUACUGACUU- 5'	no
oni-miR-725	rna-XM_027283772.1	gene-mdm1	mdm1	Mdm1 nuclear protein, transcript variant X1	193	219	162	-24.94	miRNA: 3' ugCUGGUCU---UUGUU--ACUGACUu 5' :*||:||||***||:||**|||||||| target: 5' gaGATCAGAGTCAATAAAGTGACTGAa 3'	194	215	-27.9	0.001649	target: 5' AGAGUCAAUAAAGUGACUGAAG 3' |||:*|*****|:||||||||* miRNA: 3' UCUUUG-----UUACUGACUU- 5'	no
oni-miR-725	rna-XM_019259372.2	gene-LOC104928943	LOC104928943	phosphatidylinositol-binding clathrin assembly protein, transcript variant X16	2962	2984	168	-26.96	miRNA: 3' ugcugGUC-UUUGUUACUGACUu 5' |||**:||*|:|||||||||||| target: 5' acgtgTAGCAGACAATGACTGAa 3'	2959	2980	-33.7	0.006283	target: 5' UAGCAGACAAUGACUGAAG 3' :||*|:||||||||||||* miRNA: 3' GUC-UUUGUUACUGACUU- 5'	no
oni-miR-725	rna-XM_027279541.1	gene-LOC109138412	LOC109138412	uncharacterized LOC109138412, transcript variant X2	51	71	165	-20.43	miRNA: 3' ugcUGGUCUUUGUUACUGACUu 5' :**||**|||||*||||||||| target: 5' gaaACATGAAAC-ATGACTGAa 3'	48	69	-24.4	0.002581	target: 5' ACAUGAAAC-AUGACUGAAG 3' ****|||||*|||||||||* miRNA: 3' GU--CUUUGUUACUGACUU- 5'	no
oni-miR-725	rna-XM_019266441.2	gene-tfap2b	tfap2b	transcription factor AP-2 beta, transcript variant X1	11	32	164	-25.18	miRNA: 3' ugcuggUCUUUGUUACUGACUu 5' :**:**:|:|:|:||||||||: target: 5' gaaggaGGGAGCGATGACTGAg 3'	10	31	-29	0.007338	target: 5' GAGGGAGCGAUGACUGAGA 3' **:|:|:|:||||||||:* miRNA: 3' --UCUUUGUUACUGACUU- 5'	no
oni-miR-725	rna-XM_019258430.2	gene-LOC109138412	LOC109138412	uncharacterized LOC109138412, transcript variant X2	51	71	165	-20.43	miRNA: 3' ugcUGGUCUUUGUUACUGACUu 5' :**||**|||||*||||||||| target: 5' gaaACATGAAAC-ATGACTGAa 3'	48	69	-24.4	0.002581	target: 5' ACAUGAAAC-AUGACUGAAG 3' ****|||||*|||||||||* miRNA: 3' GU--CUUUGUUACUGACUU- 5'	no
oni-miR-725	rna-XM_010743340.3	gene-LOC104928943	LOC104928943	phosphatidylinositol-binding clathrin assembly protein, transcript variant X16	2962	2984	168	-26.96	miRNA: 3' ugcugGUC-UUUGUUACUGACUu 5' |||**:||*|:|||||||||||| target: 5' acgtgTAGCAGACAATGACTGAa 3'	2959	2980	-33.7	0.006283	target: 5' UAGCAGACAAUGACUGAAG 3' :||*|:||||||||||||* miRNA: 3' GUC-UUUGUUACUGACUU- 5'	no
oni-miR-725	rna-XM_027280536.1	gene-LOC113746101	LOC113746101	dual specificity protein phosphatase 14-like, transcript variant X3	12	32	173	-23.99	miRNA: 3' ugcUGGUCUUUGUUACUGACUu 5' |**|||||*|||*||||||||| target: 5' agaACCAG-AACCATGACTGAa 3'	12	33	-26.6	0.007307	target: 5' CAGAA-CCAUGACUGAAC 3' |||||*|*|||||||||* miRNA: 3' GUCUUUGUUACUGACUU- 5'	no
oni-miR-725	rna-XM_027289777.1	gene-dnaaf3	dnaaf3	dynein axonemal assembly factor 3, transcript variant X2	473	494	168	-27.04	miRNA: 3' ugCUGGUCUUUGUUACUGACUu 5' |:||||||*|:**:|||||||| target: 5' atGACCAGCAGGTGTGACTGAa 3'	472	493	-31.2	0.005498	target: 5' CAGCAGGUGUGACUGAAG 3' |||*|:**:||||||||* miRNA: 3' GUCUUUGUUACUGACUU- 5'	no
oni-miR-725	rna-XM_027279457.1	gene-LOC109138412	LOC109138412	uncharacterized LOC109138412, transcript variant X2	51	71	165	-20.43	miRNA: 3' ugcUGGUCUUUGUUACUGACUu 5' :**||**|||||*||||||||| target: 5' gaaACATGAAAC-ATGACTGAa 3'	48	69	-24.4	0.002581	target: 5' ACAUGAAAC-AUGACUGAAG 3' ****|||||*|||||||||* miRNA: 3' GU--CUUUGUUACUGACUU- 5'	no
oni-miR-725	rna-XM_027280450.1	gene-LOC104928943	LOC104928943	phosphatidylinositol-binding clathrin assembly protein, transcript variant X16	2962	2984	168	-26.96	miRNA: 3' ugcugGUC-UUUGUUACUGACUu 5' |||**:||*|:|||||||||||| target: 5' acgtgTAGCAGACAATGACTGAa 3'	2959	2980	-33.7	0.006283	target: 5' UAGCAGACAAUGACUGAAG 3' :||*|:||||||||||||* miRNA: 3' GUC-UUUGUUACUGACUU- 5'	no
oni-miR-725	rna-XM_019275039.2	gene-LOC104928537	LOC104928537	5'-nucleotidase	25	46	171	-20.05	miRNA: 3' ugcUGGUCUUUGUUACUGACUu 5' ***||:*|||:*|||||||||| target: 5' tgaACTTGAAGAAATGACTGAa 3'	16	37	-25.8	0.00333	target: 5' AUGUGAACUUGAAGAAAUGACUGAAA 3' **********|||:*||||||||||* miRNA: 3' GU--------CUUUGUUACUGACUU- 5'	no
oni-miR-725	rna-XM_010754553.3	gene-LOC104938193	LOC104938193	platelet-derived growth factor subunit A	376	397	167	-29.21	miRNA: 3' ugcUGGUCUUUGUUACUGACUu 5' *:*:|:|||||||:||||||:: target: 5' cttGCTAGAAACAGTGACTGGg 3'	226	247	-27.7	0.009392	target: 5' AGAAACAGUGACUGGGA 3' |||||||:||||||::* miRNA: 3' UCUUUGUUACUGACUU- 5'	no
oni-miR-725	rna-XM_010743337.3	gene-LOC104928943	LOC104928943	phosphatidylinositol-binding clathrin assembly protein, transcript variant X16	2962	2984	168	-26.96	miRNA: 3' ugcugGUC-UUUGUUACUGACUu 5' |||**:||*|:|||||||||||| target: 5' acgtgTAGCAGACAATGACTGAa 3'	2959	2980	-33.7	0.006283	target: 5' UAGCAGACAAUGACUGAAG 3' :||*|:||||||||||||* miRNA: 3' GUC-UUUGUUACUGACUU- 5'	no
oni-miR-725	rna-XM_010743339.3	gene-LOC104928943	LOC104928943	phosphatidylinositol-binding clathrin assembly protein, transcript variant X16	1519	1541	168	-26.96	miRNA: 3' ugcugGUC-UUUGUUACUGACUu 5' |||**:||*|:|||||||||||| target: 5' acgtgTAGCAGACAATGACTGAa 3'	1517	1538	-33.7	0.002757	target: 5' UAGCAGACAAUGACUGAAG 3' :||*|:||||||||||||* miRNA: 3' GUC-UUUGUUACUGACUU- 5'	no
oni-miR-725	rna-XM_027282698.1	gene-pax5	pax5	paired box 5, transcript variant X1	345	366	167	-25.1	miRNA: 3' ugcugguCUUUGUUACUGACUu 5' *******|||:||:|||||||| target: 5' cgtcagcGAAGCAGTGACTGAa 3'	343	364	-30	0.003153	target: 5' CAGCGAAGCAGUGACUGAAG 3' ||**|||:||:||||||||* miRNA: 3' GU--CUUUGUUACUGACUU- 5'	no
oni-miR-725	rna-XM_027274853.1	gene-LOC104935570	LOC104935570	galectin-related protein B, transcript variant X2	200	222	175	-23.09	miRNA: 3' ugCUGGUCUU-UGUUACUGACUu 5' :*|||:*|||*|:|||||||||| target: 5' gaGACTTGAAGATAATGACTGAa 3'	201	222	-27.2	0.008136	target: 5' UGAAGAUAAUGACUGAAU 3' *|*|:|:||||||||||* miRNA: 3' UC-UUUGUUACUGACUU- 5'	no
oni-miR-725	rna-XM_027275228.1	gene-dglucy	dglucy	D-glutamate cyclase, transcript variant X5	45	66	176	-25.48	miRNA: 3' ugCUGGUCUUUGUUACUGACUu 5' :*||::|*|:|||:|||||||| target: 5' gaGATTAAAGACAGTGACTGAa 3'	46	67	-28	9.8e-05	target: 5' AAAGACAGUGACUGAA 3' |*|:|||:|||||||| miRNA: 3' UCUUUGUUACUGACUU 5'	no
oni-miR-725	rna-XM_027281859.1	gene-LOC104932419	LOC104932419	zinc finger protein 774, transcript variant X3	37	57	166	-23.6	miRNA: 3' ugCUGGUCUUUGUUACUGACUu 5' |*|||::|||:*|*|||||||| target: 5' aaGACTGGAAG-ACTGACTGAa 3'	283	304	-26.9	0.009882	target: 5' GGAAGAC-UGACUGAAG 3' :|||:***||||||||* miRNA: 3' UCUUUGUUACUGACUU- 5'	no
oni-miR-725	rna-XM_027283774.1	gene-mdm1	mdm1	Mdm1 nuclear protein, transcript variant X1	193	219	162	-24.94	miRNA: 3' ugCUGGUCU---UUGUU--ACUGACUu 5' :*||:||||***||:||**|||||||| target: 5' gaGATCAGAGTCAATAAAGTGACTGAa 3'	194	215	-27.9	0.001649	target: 5' AGAGUCAAUAAAGUGACUGAAG 3' |||:*|*****|:||||||||* miRNA: 3' UCUUUG-----UUACUGACUU- 5'	no
oni-miR-725	rna-XM_027284032.1	gene-exoc8	exoc8	exocyst complex component 8	446	467	172	-24.93	miRNA: 3' ugCUGGUCUUUGUUACUGACUu 5' |:|||:|*||:*:||||||||| target: 5' atGACTAAAAGGGATGACTGAa 3'	445	466	-28.4	0.006137	target: 5' UAAAAGGGAUGACUGAAA 3' :|*||:*:|||||||||* miRNA: 3' GUCUUUGUUACUGACUU- 5'	no
oni-miR-725	rna-XM_010735282.3	gene-pcdh7	pcdh7	protocadherin 7, transcript variant X4	876	897	188	-35.76	miRNA: 3' ugCUGGUCUUUGUUACUGACUu 5' ||||*|||||||:||||||||: target: 5' acGAGCAGAAACGATGACTGAg 3'	875	896	-37.3	0.001037	target: 5' CAGAAACGAUGACUGAGU 3' |||||||:||||||||:* miRNA: 3' GUCUUUGUUACUGACUU- 5'	no
oni-miR-725	rna-XM_019268745.2	gene-rd3	rd3	retinal degeneration 3, GUCY2D regulator, transcript variant X1	9	30	165	-21.02	miRNA: 3' ugcugGUCUUUGUUACUGACUu 5' ::***::|:|||::|||||||* target: 5' gttcaTGGGAACGGTGACTGAc 3'	6	27	-28.8	0.004365	target: 5' CAUGGGAACGGUGACUGAC 3' |**:|:|||::|||||||* miRNA: 3' G--UCUUUGUUACUGACUU 5'	no
oni-miR-725	rna-XM_019269122.2	gene-map1b	map1b	microtubule associated protein 1B	23	47	163	-29.71	miRNA: 3' ugCUGGUCUUU---GUUACUGACUu 5' :|||:|||:|:***:|:|||||||* target: 5' gcGATCAGGAGGCCTAGTGACTGAt 3'	22	43	-32	0.00527	target: 5' CAGGAGGCCUAGUGACUGAU 3' |||:|:***:|:|||||||* miRNA: 3' GUCUUU---GUUACUGACUU 5'	no
oni-miR-725	rna-XM_027281860.1	gene-LOC104932419	LOC104932419	zinc finger protein 774, transcript variant X3	37	57	166	-23.6	miRNA: 3' ugCUGGUCUUUGUUACUGACUu 5' |*|||::|||:*|*|||||||| target: 5' aaGACTGGAAG-ACTGACTGAa 3'	283	304	-26.9	0.009882	target: 5' GGAAGAC-UGACUGAAG 3' :|||:***||||||||* miRNA: 3' UCUUUGUUACUGACUU- 5'	no
oni-miR-725	rna-XM_019266442.2	gene-tfap2b	tfap2b	transcription factor AP-2 beta, transcript variant X1	11	32	164	-25.18	miRNA: 3' ugcuggUCUUUGUUACUGACUu 5' :**:**:|:|:|:||||||||: target: 5' gaaggaGGGAGCGATGACTGAg 3'	10	31	-29	0.007338	target: 5' GAGGGAGCGAUGACUGAGA 3' **:|:|:|:||||||||:* miRNA: 3' --UCUUUGUUACUGACUU- 5'	no
oni-miR-725	rna-XM_027284542.1	gene-rd3	rd3	retinal degeneration 3, GUCY2D regulator, transcript variant X1	9	30	165	-21.02	miRNA: 3' ugcugGUCUUUGUUACUGACUu 5' ::***::|:|||::|||||||* target: 5' gttcaTGGGAACGGTGACTGAc 3'	6	27	-28.8	0.004365	target: 5' CAUGGGAACGGUGACUGAC 3' |**:|:|||::|||||||* miRNA: 3' G--UCUUUGUUACUGACUU 5'	no
oni-miR-725	rna-XM_010749444.3	gene-LOC104933900	LOC104933900	acidic mammalian chitinase-like	203	228	161	-22.08	miRNA: 3' ugCUGG--U-CUUUGU-UACUGACUu 5' |:||||**|*|||*||*||||||||* target: 5' atGACCTGATGAATCATATGACTGAt 3'	202	223	-26.3	0.008264	target: 5' CUGAUGAAUCAUAUGACUGAU 3' |****|||*||*||||||||* miRNA: 3' GU---CUUUGU-UACUGACUU 5'	no
oni-miR-725	rna-XM_027287613.1	gene-LOC113747579	LOC113747579	low affinity immunoglobulin gamma Fc region receptor II-like, transcript variant X2	157	179	171	-26.19	miRNA: 3' ugCUGGUCUUUGU-UACUGACUu 5' :*||*||||:|||**|||||||| target: 5' gaGAGCAGAGACACTTGACTGAa 3'	158	179	-29.9	0.004265	target: 5' AGAGACACUUGACUGAAG 3' |||:|||**||||||||* miRNA: 3' UCUUUGUU-ACUGACUU- 5'	no
oni-miR-725	rna-XM_010730982.3	gene-ndnf	ndnf	neuron derived neurotrophic factor	113	134	168	-26.29	miRNA: 3' ugCUGGUCUUUGUUACUGACUu 5' **|:||*|*::||:|||||||| target: 5' tgGGCCTGTGGCAGTGACTGAa 3'	114	135	-30.1	0.007407	target: 5' UGUGGCAGUGACUGAAC 3' *|*::||:||||||||* miRNA: 3' UCUUUGUUACUGACUU- 5'	no
oni-miR-725	rna-XM_027275225.1	gene-dglucy	dglucy	D-glutamate cyclase, transcript variant X5	45	66	176	-25.48	miRNA: 3' ugCUGGUCUUUGUUACUGACUu 5' :*||::|*|:|||:|||||||| target: 5' gaGATTAAAGACAGTGACTGAa 3'	46	67	-28	9.8e-05	target: 5' AAAGACAGUGACUGAA 3' |*|:|||:|||||||| miRNA: 3' UCUUUGUUACUGACUU 5'	no
oni-miR-725	rna-XM_019270833.2	gene-LOC104921020	LOC104921020	myoD family inhibitor domain-containing protein-like	21	42	164	-21.75	miRNA: 3' ugCUGGUCUUUGUUACUGACUu 5' :*|:||*|*:||*:|||||||| target: 5' gaGGCCTGTGACTGTGACTGAa 3'	9	30	-28.7	0.003778	target: 5' GGACCACGAGGCCUGUGACUGUGACUGAAG 3' :||*************:||*:||||||||* miRNA: 3' UCU-------------UUGUUACUGACUU- 5'	no
oni-miR-725	rna-XM_010743344.3	gene-LOC104928943	LOC104928943	phosphatidylinositol-binding clathrin assembly protein, transcript variant X16	2962	2984	168	-26.96	miRNA: 3' ugcugGUC-UUUGUUACUGACUu 5' |||**:||*|:|||||||||||| target: 5' acgtgTAGCAGACAATGACTGAa 3'	2959	2980	-33.7	0.006283	target: 5' UAGCAGACAAUGACUGAAG 3' :||*|:||||||||||||* miRNA: 3' GUC-UUUGUUACUGACUU- 5'	no
oni-miR-725	rna-XM_027275354.1	gene-LOC113744672	LOC113744672	uncharacterized LOC113744672	524	548	170	-23.27	miRNA: 3' ugCUGGU-CUU--UGUUACUGACUu 5' |:|||*|*|||**|||||||||||* target: 5' atGACAATGAATTACAATGACTGAt 3'	523	544	-28.3	0.006713	target: 5' ACCGUGAAUUACAAUGACUGAU 3' |||:*|||**|||||||||||* miRNA: 3' UGGU-CUU--UGUUACUGACUU 5'	no
oni-miR-725	rna-XM_027282697.1	gene-pax5	pax5	paired box 5, transcript variant X1	345	366	167	-25.1	miRNA: 3' ugcugguCUUUGUUACUGACUu 5' *******|||:||:|||||||| target: 5' cgtcagcGAAGCAGTGACTGAa 3'	343	364	-30	0.003153	target: 5' CAGCGAAGCAGUGACUGAAG 3' ||**|||:||:||||||||* miRNA: 3' GU--CUUUGUUACUGACUU- 5'	no
oni-miR-725	rna-XM_027282699.1	gene-pax5	pax5	paired box 5, transcript variant X1	345	366	167	-25.1	miRNA: 3' ugcugguCUUUGUUACUGACUu 5' *******|||:||:|||||||| target: 5' cgtcagcGAAGCAGTGACTGAa 3'	343	364	-30	0.003153	target: 5' CAGCGAAGCAGUGACUGAAG 3' ||**|||:||:||||||||* miRNA: 3' GU--CUUUGUUACUGACUU- 5'	no
oni-miR-725	rna-XM_019259373.2	gene-LOC104928943	LOC104928943	phosphatidylinositol-binding clathrin assembly protein, transcript variant X16	2962	2984	168	-26.96	miRNA: 3' ugcugGUC-UUUGUUACUGACUu 5' |||**:||*|:|||||||||||| target: 5' acgtgTAGCAGACAATGACTGAa 3'	2959	2980	-33.7	0.006283	target: 5' UAGCAGACAAUGACUGAAG 3' :||*|:||||||||||||* miRNA: 3' GUC-UUUGUUACUGACUU- 5'	no
oni-miR-725	rna-XM_010743070.3	gene-xkrx	xkrx	XK related X-linked	343	364	184	-25.01	miRNA: 3' ugCUGGUCUUUGUUACUGACUu 5' **||:||*:||||||||||||* target: 5' tgGATCATGAACAATGACTGAc 3'	344	365	-29.9	0.004829	target: 5' AUGAACAAUGACUGAC 3' |*:||||||||||||* miRNA: 3' UCUUUGUUACUGACUU 5'	no
oni-miR-725	rna-XM_027280452.1	gene-LOC104928943	LOC104928943	phosphatidylinositol-binding clathrin assembly protein, transcript variant X16	2962	2984	168	-26.96	miRNA: 3' ugcugGUC-UUUGUUACUGACUu 5' |||**:||*|:|||||||||||| target: 5' acgtgTAGCAGACAATGACTGAa 3'	2959	2980	-33.7	0.006283	target: 5' UAGCAGACAAUGACUGAAG 3' :||*|:||||||||||||* miRNA: 3' GUC-UUUGUUACUGACUU- 5'	no
oni-miR-725	rna-XM_010743335.3	gene-LOC104928943	LOC104928943	phosphatidylinositol-binding clathrin assembly protein, transcript variant X16	2962	2984	168	-26.96	miRNA: 3' ugcugGUC-UUUGUUACUGACUu 5' |||**:||*|:|||||||||||| target: 5' acgtgTAGCAGACAATGACTGAa 3'	2959	2980	-33.7	0.006283	target: 5' UAGCAGACAAUGACUGAAG 3' :||*|:||||||||||||* miRNA: 3' GUC-UUUGUUACUGACUU- 5'	no
oni-miR-725	rna-XM_027288815.1	gene-tmem106c	tmem106c	transmembrane protein 106C, transcript variant X2	1018	1041	173	-26.06	miRNA: 3' ugcuGGUCUUUGUU--ACUGACUu 5' |***||:|||||||**|||||||| target: 5' aaatCCGGAAACAAAGTGACTGAa 3'	1020	1041	-29.6	0.009156	target: 5' GGAAACAAAGUGACUGAAA 3' :||||||**:||||||||* miRNA: 3' UCUUUGU--UACUGACUU- 5'	no
oni-miR-725	rna-XM_027284541.1	gene-rd3	rd3	retinal degeneration 3, GUCY2D regulator, transcript variant X1	9	30	165	-21.02	miRNA: 3' ugcugGUCUUUGUUACUGACUu 5' ::***::|:|||::|||||||* target: 5' gttcaTGGGAACGGTGACTGAc 3'	6	27	-28.8	0.004365	target: 5' CAUGGGAACGGUGACUGAC 3' |**:|:|||::|||||||* miRNA: 3' G--UCUUUGUUACUGACUU 5'	no
oni-miR-725	rna-XM_027285653.1	gene-mxra7	mxra7	matrix remodeling associated 7, transcript variant X5	260	283	175	-25.49	miRNA: 3' ugCUGGUCUUUGUU--ACUGACUu 5' *:|:*|||||||||**|||||||| target: 5' ctGGACAGAAACAAACTGACTGAa 3'	257	278	-28.5	0.003537	target: 5' GGACAGAAACAAACUGACUGAAU 3' ***|||||||||**||||||||* miRNA: 3' ---GUCUUUGUU--ACUGACUU- 5'	no
oni-miR-725	rna-XM_027280532.1	gene-LOC113746099	LOC113746099	homeobox protein MOX-2-like	285	310	162	-26.3	miRNA: 3' ugcUGGUCU----UUGUUACUGACUu 5' ||*||||||*****|||:|||||||* target: 5' acaACCAGATTTTTACAGTGACTGAt 3'	284	305	-30.8	0.000835	target: 5' CAGAUUUUUACAGUGACUGAU 3' ||||*****|||:|||||||* miRNA: 3' GUCUU----UGUUACUGACUU 5'	no
oni-miR-725	rna-XM_027283998.1	gene-LOC104938440	LOC104938440	ADP-ribosylation factor 4	6	28	171	-25.38	miRNA: 3' ugCUGGUCUUUGU-UACUGACUu 5' *:|||*:|||:||*:|||||||* target: 5' ctGACAGGAAGCAGGTGACTGAt 3'	6	27	-28.5	0.006108	target: 5' GGAAGCAGGUGACUGAU 3' :|||:||:*|||||||* miRNA: 3' UCUUUGUU-ACUGACUU 5'	no
oni-miR-725	rna-XM_027272523.1	gene-kcp	kcp	kielin cysteine rich BMP regulator	153	174	168	-20.54	miRNA: 3' ugCUGGUCUUUGUUACUGACUu 5' **||::**|*|||||||||||| target: 5' tgGATTTAACACAATGACTGAa 3'	147	168	-30	0.0019	target: 5' UGGAUUUAACACAAUGACUGAAG 3' ::||******||||||||||||* miRNA: 3' GUCUU-----UGUUACUGACUU- 5'	no
oni-miR-725	rna-XM_027287555.1	gene-LOC109142423	LOC109142423	caldesmon-like	44	66	160	-20.16	miRNA: 3' ugCUGGUCU-UUG-UUACUGACUu 5' *:||*||||*|::*|||||||||| target: 5' ctGA-CAGACAGTGAATGACTGAa 3'	44	65	-25.5	0.006069	target: 5' AGACAGUGAAUGACUGAAC 3' |||**:**||||||||||* miRNA: 3' UCU--UUGUUACUGACUU- 5'	no
oni-miR-725	rna-XM_027278698.1	gene-LOC104930366	LOC104930366	protein Daple, transcript variant X1	1715	1737	170	-24.68	miRNA: 3' ugcUGGU-CUUUGUUACUGACUu 5' ***||||**||||::|||||||: target: 5' taaACCATAAAACGGTGACTGAg 3'	809	830	-35.1	0.002874	target: 5' CAGAAGCACCAGAGGGACUGAAU 3' |||||:||*******|||||||* miRNA: 3' GUCUUUGUUA-----CUGACUU- 5'	no
oni-miR-725	rna-XM_027284544.1	gene-rd3	rd3	retinal degeneration 3, GUCY2D regulator, transcript variant X1	9	30	165	-21.02	miRNA: 3' ugcugGUCUUUGUUACUGACUu 5' ::***::|:|||::|||||||* target: 5' gttcaTGGGAACGGTGACTGAc 3'	6	27	-28.8	0.004365	target: 5' CAUGGGAACGGUGACUGAC 3' |**:|:|||::|||||||* miRNA: 3' G--UCUUUGUUACUGACUU 5'	no
oni-miR-725	rna-XM_027280537.1	gene-LOC113746101	LOC113746101	dual specificity protein phosphatase 14-like, transcript variant X3	12	32	173	-23.99	miRNA: 3' ugcUGGUCUUUGUUACUGACUu 5' |**|||||*|||*||||||||| target: 5' agaACCAG-AACCATGACTGAa 3'	12	33	-26.6	0.007307	target: 5' CAGAA-CCAUGACUGAAC 3' |||||*|*|||||||||* miRNA: 3' GUCUUUGUUACUGACUU- 5'	no
oni-miR-725	rna-XM_027282700.1	gene-pax5	pax5	paired box 5, transcript variant X1	345	366	167	-25.1	miRNA: 3' ugcugguCUUUGUUACUGACUu 5' *******|||:||:|||||||| target: 5' cgtcagcGAAGCAGTGACTGAa 3'	343	364	-30	0.003153	target: 5' CAGCGAAGCAGUGACUGAAG 3' ||**|||:||:||||||||* miRNA: 3' GU--CUUUGUUACUGACUU- 5'	no
oni-miR-725	rna-XM_010744541.3	gene-LOC104929902	LOC104929902	TCDD-inducible poly [ADP-ribose] polymerase	501	522	168	-25.45	miRNA: 3' ugcuggUCUUUGUUACUGACUu 5' ***|**:||:|||:|||||||: target: 5' cacagaGGAGACAGTGACTGAg 3'	494	515	-31.4	0.004762	target: 5' CCACAGAGGAGACAGUGACUGAGU 3' |******:||:|||:|||||||:* miRNA: 3' G------UCUUUGUUACUGACUU- 5'	no
oni-miR-725	rna-XM_027275227.1	gene-dglucy	dglucy	D-glutamate cyclase, transcript variant X5	45	66	176	-25.48	miRNA: 3' ugCUGGUCUUUGUUACUGACUu 5' :*||::|*|:|||:|||||||| target: 5' gaGATTAAAGACAGTGACTGAa 3'	46	67	-28	9.8e-05	target: 5' AAAGACAGUGACUGAA 3' |*|:|||:|||||||| miRNA: 3' UCUUUGUUACUGACUU 5'	no
oni-miR-725	rna-XM_010743336.3	gene-LOC104928943	LOC104928943	phosphatidylinositol-binding clathrin assembly protein, transcript variant X16	2962	2984	168	-26.96	miRNA: 3' ugcugGUC-UUUGUUACUGACUu 5' |||**:||*|:|||||||||||| target: 5' acgtgTAGCAGACAATGACTGAa 3'	2959	2980	-33.7	0.006283	target: 5' UAGCAGACAAUGACUGAAG 3' :||*|:||||||||||||* miRNA: 3' GUC-UUUGUUACUGACUU- 5'	no
oni-miR-725	rna-XM_010743338.3	gene-LOC104928943	LOC104928943	phosphatidylinositol-binding clathrin assembly protein, transcript variant X16	2962	2984	168	-26.96	miRNA: 3' ugcugGUC-UUUGUUACUGACUu 5' |||**:||*|:|||||||||||| target: 5' acgtgTAGCAGACAATGACTGAa 3'	2959	2980	-33.7	0.006283	target: 5' UAGCAGACAAUGACUGAAG 3' :||*|:||||||||||||* miRNA: 3' GUC-UUUGUUACUGACUU- 5'	no
oni-miR-725	rna-XM_010743343.3	gene-LOC104928943	LOC104928943	phosphatidylinositol-binding clathrin assembly protein, transcript variant X16	2962	2984	168	-26.96	miRNA: 3' ugcugGUC-UUUGUUACUGACUu 5' |||**:||*|:|||||||||||| target: 5' acgtgTAGCAGACAATGACTGAa 3'	2959	2980	-33.7	0.006283	target: 5' UAGCAGACAAUGACUGAAG 3' :||*|:||||||||||||* miRNA: 3' GUC-UUUGUUACUGACUU- 5'	no
oni-miR-725	rna-XM_019277836.2	gene-LOC104935570	LOC104935570	galectin-related protein B, transcript variant X2	200	222	175	-23.09	miRNA: 3' ugCUGGUCUU-UGUUACUGACUu 5' :*|||:*|||*|:|||||||||| target: 5' gaGACTTGAAGATAATGACTGAa 3'	201	222	-27.2	0.008136	target: 5' UGAAGAUAAUGACUGAAU 3' *|*|:|:||||||||||* miRNA: 3' UC-UUUGUUACUGACUU- 5'	no
oni-miR-725	rna-XM_027280451.1	gene-LOC104928943	LOC104928943	phosphatidylinositol-binding clathrin assembly protein, transcript variant X16	2962	2984	168	-26.96	miRNA: 3' ugcugGUC-UUUGUUACUGACUu 5' |||**:||*|:|||||||||||| target: 5' acgtgTAGCAGACAATGACTGAa 3'	2959	2980	-33.7	0.006283	target: 5' UAGCAGACAAUGACUGAAG 3' :||*|:||||||||||||* miRNA: 3' GUC-UUUGUUACUGACUU- 5'	no
oni-miR-725	rna-XM_027284540.1	gene-rd3	rd3	retinal degeneration 3, GUCY2D regulator, transcript variant X1	9	30	165	-21.02	miRNA: 3' ugcugGUCUUUGUUACUGACUu 5' ::***::|:|||::|||||||* target: 5' gttcaTGGGAACGGTGACTGAc 3'	6	27	-28.8	0.004365	target: 5' CAUGGGAACGGUGACUGAC 3' |**:|:|||::|||||||* miRNA: 3' G--UCUUUGUUACUGACUU 5'	no
oni-miR-725	rna-XM_027284539.1	gene-rd3	rd3	retinal degeneration 3, GUCY2D regulator, transcript variant X1	9	30	165	-21.02	miRNA: 3' ugcugGUCUUUGUUACUGACUu 5' ::***::|:|||::|||||||* target: 5' gttcaTGGGAACGGTGACTGAc 3'	6	27	-28.8	0.004365	target: 5' CAUGGGAACGGUGACUGAC 3' |**:|:|||::|||||||* miRNA: 3' G--UCUUUGUUACUGACUU 5'	no
oni-miR-725	rna-XM_010754131.3	gene-acadvl	acadvl	acyl-CoA dehydrogenase very long chain	323	342	164	-25.52	miRNA: 3' ugcUGGUCUUUGUUACUGACUu 5' ***|||||**:|:||||||||| target: 5' taaACCAG--GCGATGACTGAa 3'	310	331	-30.3	0.009151	target: 5' CUGCAUCUAAACCAGGCGAUGACUGAAU 3' |*|**********|::|:|||||||||* miRNA: 3' GUC----------UUUGUUACUGACUU- 5'	no
oni-miR-725	rna-XM_027281861.1	gene-LOC104932419	LOC104932419	zinc finger protein 774, transcript variant X3	37	57	166	-23.6	miRNA: 3' ugCUGGUCUUUGUUACUGACUu 5' |*|||::|||:*|*|||||||| target: 5' aaGACTGGAAG-ACTGACTGAa 3'	283	304	-26.9	0.009882	target: 5' GGAAGAC-UGACUGAAG 3' :|||:***||||||||* miRNA: 3' UCUUUGUUACUGACUU- 5'	no
oni-miR-725	rna-XM_010753504.3	gene-chst2	chst2	carbohydrate sulfotransferase 2	212	234	179	-26.68	miRNA: 3' ugCUGG-UCUUUGUUACUGACUu 5' |*||||*|*:||||||||||||| target: 5' aaGACCTACGAACAATGACTGAa 3'	213	234	-31	0.004109	target: 5' UACGAACAAUGACUGAAU 3' ***:|||||||||||||* miRNA: 3' UC-UUUGUUACUGACUU- 5'	no
oni-miR-725	rna-XM_019258432.2	gene-LOC109138412	LOC109138412	uncharacterized LOC109138412, transcript variant X2	51	71	165	-20.43	miRNA: 3' ugcUGGUCUUUGUUACUGACUu 5' :**||**|||||*||||||||| target: 5' gaaACATGAAAC-ATGACTGAa 3'	48	69	-24.4	0.002581	target: 5' ACAUGAAAC-AUGACUGAAG 3' ****|||||*|||||||||* miRNA: 3' GU--CUUUGUUACUGACUU- 5'	no
oni-miR-725	rna-XM_010743342.3	gene-LOC104928943	LOC104928943	phosphatidylinositol-binding clathrin assembly protein, transcript variant X16	2962	2984	168	-26.96	miRNA: 3' ugcugGUC-UUUGUUACUGACUu 5' |||**:||*|:|||||||||||| target: 5' acgtgTAGCAGACAATGACTGAa 3'	2959	2980	-33.7	0.006283	target: 5' UAGCAGACAAUGACUGAAG 3' :||*|:||||||||||||* miRNA: 3' GUC-UUUGUUACUGACUU- 5'	no
oni-miR-725	rna-XM_027284543.1	gene-rd3	rd3	retinal degeneration 3, GUCY2D regulator, transcript variant X1	9	30	165	-21.02	miRNA: 3' ugcugGUCUUUGUUACUGACUu 5' ::***::|:|||::|||||||* target: 5' gttcaTGGGAACGGTGACTGAc 3'	6	27	-28.8	0.004365	target: 5' CAUGGGAACGGUGACUGAC 3' |**:|:|||::|||||||* miRNA: 3' G--UCUUUGUUACUGACUU 5'	no
oni-miR-725	rna-XM_027275229.1	gene-dglucy	dglucy	D-glutamate cyclase, transcript variant X5	45	66	176	-25.48	miRNA: 3' ugCUGGUCUUUGUUACUGACUu 5' :*||::|*|:|||:|||||||| target: 5' gaGATTAAAGACAGTGACTGAa 3'	46	67	-28	9.8e-05	target: 5' AAAGACAGUGACUGAA 3' |*|:|||:|||||||| miRNA: 3' UCUUUGUUACUGACUU 5'	no
oni-miR-725	rna-XM_027280534.1	gene-LOC113746101	LOC113746101	dual specificity protein phosphatase 14-like, transcript variant X3	12	32	173	-23.99	miRNA: 3' ugcUGGUCUUUGUUACUGACUu 5' |**|||||*|||*||||||||| target: 5' agaACCAG-AACCATGACTGAa 3'	12	33	-26.6	0.007307	target: 5' CAGAA-CCAUGACUGAAC 3' |||||*|*|||||||||* miRNA: 3' GUCUUUGUUACUGACUU- 5'	no
oni-miR-725	rna-XM_019276661.1	gene-cspg4	cspg4	chondroitin sulfate proteoglycan 4	790	811	184	-30.69	miRNA: 3' ugCUGGUCUUUGUUACUGACUu 5' *:|:|||||*:||||||||||* target: 5' ttGGCCAGATGCAATGACTGAt 3'	790	811	-35.1	0.002179	target: 5' AGAUGCAAUGACUGAU 3' |||*:||||||||||* miRNA: 3' UCUUUGUUACUGACUU 5'	no
oni-miR-725	rna-XM_027275224.1	gene-dglucy	dglucy	D-glutamate cyclase, transcript variant X5	45	66	176	-25.48	miRNA: 3' ugCUGGUCUUUGUUACUGACUu 5' :*||::|*|:|||:|||||||| target: 5' gaGATTAAAGACAGTGACTGAa 3'	46	67	-28	9.8e-05	target: 5' AAAGACAGUGACUGAA 3' |*|:|||:|||||||| miRNA: 3' UCUUUGUUACUGACUU 5'	no
oni-miR-725	rna-XM_019258704.2	gene-cntnap1	cntnap1	contactin associated protein 1	1785	1809	167	-28.77	miRNA: 3' ugCUGGUCU---UUGUUACUGACUu 5' ||||*||||***:|||:|||||||* target: 5' acGAGCAGACACGACAGTGACTGAt 3'	1783	1804	-33.3	0.007747	target: 5' CAGACACGACAGUGACUGAU 3' ||||***:|||:|||||||* miRNA: 3' GUCU---UUGUUACUGACUU 5'	no
oni-miR-725	rna-XM_010745135.3	gene-LOC104930366	LOC104930366	protein Daple, transcript variant X1	1715	1737	170	-24.68	miRNA: 3' ugcUGGU-CUUUGUUACUGACUu 5' ***||||**||||::|||||||: target: 5' taaACCATAAAACGGTGACTGAg 3'	809	830	-35.1	0.002874	target: 5' CAGAAGCACCAGAGGGACUGAAU 3' |||||:||*******|||||||* miRNA: 3' GUCUUUGUUA-----CUGACUU- 5'	no
oni-miR-725	rna-XM_010751814.3	gene-dnaaf3	dnaaf3	dynein axonemal assembly factor 3, transcript variant X2	473	494	168	-27.04	miRNA: 3' ugCUGGUCUUUGUUACUGACUu 5' |:||||||*|:**:|||||||| target: 5' atGACCAGCAGGTGTGACTGAa 3'	472	493	-31.2	0.002236	target: 5' CAGCAGGUGUGACUGAAG 3' |||*|:**:||||||||* miRNA: 3' GUCUUUGUUACUGACUU- 5'	no
oni-miR-725	rna-XM_027275226.1	gene-dglucy	dglucy	D-glutamate cyclase, transcript variant X5	45	66	176	-25.48	miRNA: 3' ugCUGGUCUUUGUUACUGACUu 5' :*||::|*|:|||:|||||||| target: 5' gaGATTAAAGACAGTGACTGAa 3'	46	67	-28	9.8e-05	target: 5' AAAGACAGUGACUGAA 3' |*|:|||:|||||||| miRNA: 3' UCUUUGUUACUGACUU 5'	no
oni-miR-725	rna-XM_027283773.1	gene-mdm1	mdm1	Mdm1 nuclear protein, transcript variant X1	193	219	162	-24.94	miRNA: 3' ugCUGGUCU---UUGUU--ACUGACUu 5' :*||:||||***||:||**|||||||| target: 5' gaGATCAGAGTCAATAAAGTGACTGAa 3'	194	215	-27.9	0.001649	target: 5' AGAGUCAAUAAAGUGACUGAAG 3' |||:*|*****|:||||||||* miRNA: 3' UCUUUG-----UUACUGACUU- 5'	no
oni-miR-725	rna-XM_019274974.2	gene-tmem106c	tmem106c	transmembrane protein 106C, transcript variant X2	1018	1041	173	-26.06	miRNA: 3' ugcuGGUCUUUGUU--ACUGACUu 5' |***||:|||||||**|||||||| target: 5' aaatCCGGAAACAAAGTGACTGAa 3'	1020	1041	-29.6	0.009156	target: 5' GGAAACAAAGUGACUGAAA 3' :||||||**:||||||||* miRNA: 3' UCUUUGU--UACUGACUU- 5'	no
oni-miR-725	rna-XM_019276806.2	gene-pcdh7	pcdh7	protocadherin 7, transcript variant X4	876	897	188	-35.76	miRNA: 3' ugCUGGUCUUUGUUACUGACUu 5' ||||*|||||||:||||||||: target: 5' acGAGCAGAAACGATGACTGAg 3'	875	896	-37.3	0.001037	target: 5' CAGAAACGAUGACUGAGU 3' |||||||:||||||||:* miRNA: 3' GUCUUUGUUACUGACUU- 5'	no
oni-miR-725	rna-XM_027287612.1	gene-LOC113747579	LOC113747579	low affinity immunoglobulin gamma Fc region receptor II-like, transcript variant X2	157	179	171	-26.19	miRNA: 3' ugCUGGUCUUUGU-UACUGACUu 5' :*||*||||:|||**|||||||| target: 5' gaGAGCAGAGACACTTGACTGAa 3'	158	179	-29.9	0.004265	target: 5' AGAGACACUUGACUGAAG 3' |||:|||**||||||||* miRNA: 3' UCUUUGUU-ACUGACUU- 5'	no
oni-miR-725	rna-XM_010743334.3	gene-LOC104928943	LOC104928943	phosphatidylinositol-binding clathrin assembly protein, transcript variant X16	2962	2984	168	-26.96	miRNA: 3' ugcugGUC-UUUGUUACUGACUu 5' |||**:||*|:|||||||||||| target: 5' acgtgTAGCAGACAATGACTGAa 3'	2959	2980	-33.7	0.006283	target: 5' UAGCAGACAAUGACUGAAG 3' :||*|:||||||||||||* miRNA: 3' GUC-UUUGUUACUGACUU- 5'	no
oni-miR-734	rna-XM_027279222.1	gene-arhgap9	arhgap9	Rho GTPase activating protein 9, transcript variant X5	48	70	175	-25.96	miRNA: 3' cuCGUGUU-AAGACGUCGUAAAu 5' *|||||||*|**||||||||||: target: 5' aaGCACAAGTAGTGCAGCATTTg 3'	48	69	-30.1	0.006301	target: 5' AAGUAGUGCAGCAUUUGU 3' ||*|**||||||||||:* miRNA: 3' UUAAG-ACGUCGUAAAU- 5'	no
oni-miR-734	rna-XM_019253933.2	gene-LOC104922501	LOC104922501	neuronal acetylcholine receptor subunit alpha-7, transcript variant X2	240	263	167	-20.31	miRNA: 3' cuCGUGUUAAG--ACGUCGUAAAu 5' *:|||:**|||**||||||||||* target: 5' tgGCATTCTTCTTTGCAGCATTTt 3'	240	261	-26.3	0.009791	target: 5' UCUUCUUUGCAGCAUUUU 3' **|||**||||||||||* miRNA: 3' UUAAG--ACGUCGUAAAU 5'	no
oni-miR-734	rna-XM_019266519.2	gene-LOC104926132	LOC104926132	microtubule-associated protein RP/EB family member 3, transcript variant X6	82	105	162	-22.23	miRNA: 3' cucGUGU--UAAGACGUCGUAAAu 5' *|*||||**|||:||||||:|||* target: 5' tatCACAACATTTTGCAGCGTTTc 3'	84	105	-26	0.004714	target: 5' AACAUUUUGCAGCGUUUC 3' |**|||:||||||:|||* miRNA: 3' U--UAAGACGUCGUAAAU 5'	no
oni-miR-734	rna-XM_027279219.1	gene-arhgap9	arhgap9	Rho GTPase activating protein 9, transcript variant X5	48	70	175	-25.96	miRNA: 3' cuCGUGUU-AAGACGUCGUAAAu 5' *|||||||*|**||||||||||: target: 5' aaGCACAAGTAGTGCAGCATTTg 3'	48	69	-30.1	0.006301	target: 5' AAGUAGUGCAGCAUUUGU 3' ||*|**||||||||||:* miRNA: 3' UUAAG-ACGUCGUAAAU- 5'	no
oni-miR-734	rna-XM_027279220.1	gene-arhgap9	arhgap9	Rho GTPase activating protein 9, transcript variant X5	48	70	175	-25.96	miRNA: 3' cuCGUGUU-AAGACGUCGUAAAu 5' *|||||||*|**||||||||||: target: 5' aaGCACAAGTAGTGCAGCATTTg 3'	48	69	-30.1	0.006301	target: 5' AAGUAGUGCAGCAUUUGU 3' ||*|**||||||||||:* miRNA: 3' UUAAG-ACGUCGUAAAU- 5'	no
oni-miR-734	rna-XM_027279216.1	gene-arhgap9	arhgap9	Rho GTPase activating protein 9, transcript variant X5	48	70	175	-25.96	miRNA: 3' cuCGUGUU-AAGACGUCGUAAAu 5' *|||||||*|**||||||||||: target: 5' aaGCACAAGTAGTGCAGCATTTg 3'	48	69	-30.1	0.006301	target: 5' AAGUAGUGCAGCAUUUGU 3' ||*|**||||||||||:* miRNA: 3' UUAAG-ACGUCGUAAAU- 5'	no
oni-miR-734	rna-XM_019253934.2	gene-LOC104922501	LOC104922501	neuronal acetylcholine receptor subunit alpha-7, transcript variant X2	240	263	167	-20.31	miRNA: 3' cuCGUGUUAAG--ACGUCGUAAAu 5' *:|||:**|||**||||||||||* target: 5' tgGCATTCTTCTTTGCAGCATTTt 3'	240	261	-26.3	0.009791	target: 5' UCUUCUUUGCAGCAUUUU 3' **|||**||||||||||* miRNA: 3' UUAAG--ACGUCGUAAAU 5'	no
oni-miR-734	rna-XM_027279218.1	gene-arhgap9	arhgap9	Rho GTPase activating protein 9, transcript variant X5	48	70	175	-25.96	miRNA: 3' cuCGUGUU-AAGACGUCGUAAAu 5' *|||||||*|**||||||||||: target: 5' aaGCACAAGTAGTGCAGCATTTg 3'	48	69	-30.1	0.006301	target: 5' AAGUAGUGCAGCAUUUGU 3' ||*|**||||||||||:* miRNA: 3' UUAAG-ACGUCGUAAAU- 5'	no
oni-miR-734	rna-XM_027279221.1	gene-arhgap9	arhgap9	Rho GTPase activating protein 9, transcript variant X5	48	70	175	-25.96	miRNA: 3' cuCGUGUU-AAGACGUCGUAAAu 5' *|||||||*|**||||||||||: target: 5' aaGCACAAGTAGTGCAGCATTTg 3'	48	69	-30.1	0.006301	target: 5' AAGUAGUGCAGCAUUUGU 3' ||*|**||||||||||:* miRNA: 3' UUAAG-ACGUCGUAAAU- 5'	no
oni-miR-734	rna-XM_010732668.3	gene-klhl26	klhl26	kelch like family member 26	906	929	163	-23.51	miRNA: 3' cuCGUGUUAAG--ACGUCGUAAAu 5' **||||**|||***|||||||||| target: 5' ctGCACTTTTCGAGGCAGCATTTa 3'	907	928	-29.7	0.007394	target: 5' UUUUCGAGGCAGCAUUUAU 3' **|||***||||||||||* miRNA: 3' UUAAGA--CGUCGUAAAU- 5'	no
oni-miR-734	rna-XM_027279217.1	gene-arhgap9	arhgap9	Rho GTPase activating protein 9, transcript variant X5	48	70	175	-25.96	miRNA: 3' cuCGUGUU-AAGACGUCGUAAAu 5' *|||||||*|**||||||||||: target: 5' aaGCACAAGTAGTGCAGCATTTg 3'	48	69	-30.1	0.006301	target: 5' AAGUAGUGCAGCAUUUGU 3' ||*|**||||||||||:* miRNA: 3' UUAAG-ACGUCGUAAAU- 5'	no
oni-miR-8159	rna-XM_019269257.2	gene-LOC104940591	LOC104940591	tight junction protein ZO-1, transcript variant X11	1	27	164	-26.63	miRNA: 3' cgUCCC--UGUCUA-AGGUCAAUGACu 5' **||||**||||*|**||*|||||||| target: 5' agAGGGCAACAGCTGGCCTGTTACTGa 3'	2	25	-29.6	0.003326	target: 5' CAACAGCUGGCCUGUUACUGAA 3' **||||*|**||*||||||||* miRNA: 3' --UGUCUAA-GGUCAAUGACU- 5'	no
oni-miR-8159	rna-XM_027289881.1	gene-wdr63	wdr63	WD repeat domain 63, transcript variant X1	163	185	168	-24.47	miRNA: 3' cgucccUGUCUAAGGUCAAUGACu 5' ||****:||||*||:||||||||| target: 5' gcttctGCAGA-TCTAGTTACTGa 3'	159	182	-33.6	0.000133	target: 5' CUUCUGCAGA-UCUAGUUACUGAG 3' *****:||||*||:|||||||||* miRNA: 3' -----UGUCUAAGGUCAAUGACU- 5'	no
oni-miR-8159	rna-XM_010730695.3	gene-rnf151	rnf151	ring finger protein 151	1	19	169	-26	miRNA: 3' cguCCCUGUCUAAGGUCAAUGACu 5' ***|||||*||*|*|||||||||* target: 5' ---GGGAC-GAGT-CAGTTACTGc 3'	1	24	-27.9	0.001137	target: 5' ACGAG--UCAGUUACUGC 3' ||:*:**:|||||||||* miRNA: 3' UGUCUAAGGUCAAUGACU 5'	no
oni-miR-8159	rna-XM_027284035.1	gene-pdia6	pdia6	protein disulfide isomerase family A member 6	92	120	163	-26.64	miRNA: 3' cguCCCU---GUCUAA--GGUCAAUGACu 5' ***||||***|*|:||**||||||||||| target: 5' aatGGGAAGCCCGGTTGCCCAGTTACTGa 3'	94	117	-30	0.003598	target: 5' AAGCCCGGUUGCCCAGUUACUGAA 3' |*:***|:||**|||||||||||* miRNA: 3' UGU---CUAA--GGUCAAUGACU- 5'	no
oni-miR-8159	rna-XM_027285739.1	gene-tsnaxip1	tsnaxip1	translin associated factor X interacting protein 1, transcript variant X1	40	66	160	-23.58	miRNA: 3' cgUCC--CUGUCUA-AGGUCAAUGACu 5' |:|||**|||**||*||*:|||||||| target: 5' gtAGGCTGACTTATCTCAGGTTACTGa 3'	39	62	-25.7	0.004261	target: 5' CUGACUUA-UCUCAGGUUACUGAC 3' **|||**|*||:**:||||||||* miRNA: 3' --CUGUCUAAGG--UCAAUGACU- 5'	no
oni-miR-8159	rna-XM_019258714.2	gene-phospho1	phospho1	phosphoethanolamine/phosphocholine phosphatase, transcript variant X1	202	228	160	-23.68	miRNA: 3' cgUCCCUGUCUAAG--GU-CAAUGACu 5' **|||**|||:*||**||*|||||||| target: 5' agAGGCCCAGGCTCAGCAGGTTACTGa 3'	199	222	-29.3	0.00716	target: 5' GGCCCAGGCUCAGCAGGUUACUGAU 3' ||**|||:*||****:||||||||* miRNA: 3' CCU-GUCUAAGG---UCAAUGACU- 5'	no
oni-miR-8159	rna-XM_027289942.1	gene-myo9b	myo9b	myosin IXB, transcript variant X6	167	189	160	-27.45	miRNA: 3' cgUCCCUGUCUAAGGUCAAUGACu 5' *::|*|||*||*|||||||:|||* target: 5' atGGAGACTGA-TCCAGTTGCTGt 3'	168	191	-30	0.009406	target: 5' GACUGA-UCCAGUUGCUGU 3' |||*||*|||||||:|||* miRNA: 3' CUGUCUAAGGUCAAUGACU 5'	no
oni-miR-8159	rna-XM_027289946.1	gene-myo9b	myo9b	myosin IXB, transcript variant X6	167	189	160	-27.45	miRNA: 3' cgUCCCUGUCUAAGGUCAAUGACu 5' *::|*|||*||*|||||||:|||* target: 5' atGGAGACTGA-TCCAGTTGCTGt 3'	168	191	-30	0.009406	target: 5' GACUGA-UCCAGUUGCUGU 3' |||*||*|||||||:|||* miRNA: 3' CUGUCUAAGGUCAAUGACU 5'	no
oni-miR-8159	rna-XM_010754788.3	gene-LOC104938400	LOC104938400	ADP-ribosylation factor 3	1184	1208	173	-24.69	miRNA: 3' cgUCCCUGUCUAAGGU-CAAUGACu 5' *::||||::||*||::*|||||||| target: 5' atGGGGATGGAGTCTGTGTTACTGa 3'	1184	1207	-32.4	0.006622	target: 5' AUGGAGUCUGUGUUACUGAA 3' |::||*||::*||||||||* miRNA: 3' UGUCUAAGGU-CAAUGACU- 5'	no
oni-miR-8159	rna-XM_010733399.3	gene-LOC104920983	LOC104920983	SPRY domain-containing SOCS box protein 4, transcript variant X3	1650	1671	161	-30.86	miRNA: 3' cgucCCUGUCUAAGGUCAAUGACu 5' ****||:|||||*:**|||||||: target: 5' agcaGGGCAGATGT--GTTACTGg 3'	1649	1672	-33.1	0.00566	target: 5' G-CAGAUGU--GUUACUGGU 3' |*|||||*:**|||||||:* miRNA: 3' CUGUCUAAGGUCAAUGACU- 5'	no
oni-miR-8159	rna-XM_010740122.3	gene-phospho1	phospho1	phosphoethanolamine/phosphocholine phosphatase, transcript variant X1	202	228	160	-23.68	miRNA: 3' cgUCCCUGUCUAAG--GU-CAAUGACu 5' **|||**|||:*||**||*|||||||| target: 5' agAGGCCCAGGCTCAGCAGGTTACTGa 3'	199	222	-29.3	0.00716	target: 5' GGCCCAGGCUCAGCAGGUUACUGAU 3' ||**|||:*||****:||||||||* miRNA: 3' CCU-GUCUAAGG---UCAAUGACU- 5'	no
oni-miR-8159	rna-XM_027288256.1	gene-LOC104932800	LOC104932800	ephrin type-B receptor 2, transcript variant X1	571	596	165	-20.15	miRNA: 3' cgucccUGUC--UAAGGUCAAUGACu 5' ||****||||**:||::||||||||* target: 5' gctaccACAGTTGTTTTAGTTACTGt 3'	555	578	-31.4	0.003259	target: 5' GCACAAUGCUGCUACCACAGUUGUUUUAGUUACUGU 3' |***************||||**:||::||||||||* miRNA: 3' C---------------UGUC--UAAGGUCAAUGACU 5'	no
oni-miR-8159	rna-XM_010753581.3	gene-slc31a1	slc31a1	solute carrier family 31 member 1, transcript variant X2	905	927	188	-34.48	miRNA: 3' cgUCCCUGUCUAAGGUCAAUGACu 5' |::||||||||||*:||||||||: target: 5' gtGGGGACAGATT-TAGTTACTGg 3'	904	927	-37.8	0.000192	target: 5' GACAGAUU-UAGUUACUGGA 3' ||||||||*:||||||||:* miRNA: 3' CUGUCUAAGGUCAAUGACU- 5'	no
oni-miR-8159	rna-XM_027287449.1	gene-dhdds	dhdds	dehydrodolichyl diphosphate synthase subunit	98	125	160	-24.1	miRNA: 3' cgUC-CCUGUCUAAG---GUCAAUGACu 5' **||*|*||:|||||****:|||||||| target: 5' agAGTGAACGGATTCATTGGGTTACTGa 3'	91	114	-33.3	0.00041	target: 5' AAGAGUGAACGGAUUCAUUGGGUUACUGAU 3' |********|:|||||****:||||||||* miRNA: 3' U--------GUCUAAGG---UCAAUGACU- 5'	no
oni-miR-8159	rna-XM_019269261.2	gene-LOC104940591	LOC104940591	tight junction protein ZO-1, transcript variant X11	1	27	164	-26.63	miRNA: 3' cgUCCC--UGUCUA-AGGUCAAUGACu 5' **||||**||||*|**||*|||||||| target: 5' agAGGGCAACAGCTGGCCTGTTACTGa 3'	2	25	-29.6	0.003326	target: 5' CAACAGCUGGCCUGUUACUGAA 3' **||||*|**||*||||||||* miRNA: 3' --UGUCUAA-GGUCAAUGACU- 5'	no
oni-miR-8159	rna-XM_027285740.1	gene-tsnaxip1	tsnaxip1	translin associated factor X interacting protein 1, transcript variant X1	40	66	160	-23.58	miRNA: 3' cgUCC--CUGUCUA-AGGUCAAUGACu 5' |:|||**|||**||*||*:|||||||| target: 5' gtAGGCTGACTTATCTCAGGTTACTGa 3'	39	62	-25.7	0.004261	target: 5' CUGACUUA-UCUCAGGUUACUGAC 3' **|||**|*||:**:||||||||* miRNA: 3' --CUGUCUAAGG--UCAAUGACU- 5'	no
oni-miR-8159	rna-XM_019261790.2	gene-mccc1	mccc1	methylcrotonoyl-CoA carboxylase 1	50	72	172	-28.23	miRNA: 3' cgUCCCUGUCUAAGGUCAAUGACu 5' **:|*||||||**|:||||||||* target: 5' agGGAGACAGA-ACTAGTTACTGt 3'	50	73	-30.6	0.005926	target: 5' GACAGAA-CUAGUUACUGU 3' ||||||**|:||||||||* miRNA: 3' CUGUCUAAGGUCAAUGACU 5'	no
oni-miR-8159	rna-XM_027289945.1	gene-myo9b	myo9b	myosin IXB, transcript variant X6	167	189	160	-27.45	miRNA: 3' cgUCCCUGUCUAAGGUCAAUGACu 5' *::|*|||*||*|||||||:|||* target: 5' atGGAGACTGA-TCCAGTTGCTGt 3'	168	191	-30	0.009406	target: 5' GACUGA-UCCAGUUGCUGU 3' |||*||*|||||||:|||* miRNA: 3' CUGUCUAAGGUCAAUGACU 5'	no
oni-miR-8159	rna-XM_027276240.1	gene-LOC104938913	LOC104938913	suppressor of cytokine signaling 7	3135	3156	169	-30.55	miRNA: 3' cgucCCUGUCUAAGGUCAAUGACu 5' |:**||||:||**||:|||||||| target: 5' gtttGGACGGA--CCGGTTACTGa 3'	3129	3152	-33.4	0.008259	target: 5' UGGACGGA--CCGGUUACUGAU 3' *||||:||**||:||||||||* miRNA: 3' -CCUGUCUAAGGUCAAUGACU- 5'	no
oni-miR-8159	rna-XM_019269255.2	gene-LOC104940591	LOC104940591	tight junction protein ZO-1, transcript variant X11	1	27	164	-26.63	miRNA: 3' cgUCCC--UGUCUA-AGGUCAAUGACu 5' **||||**||||*|**||*|||||||| target: 5' agAGGGCAACAGCTGGCCTGTTACTGa 3'	2	25	-29.6	0.003326	target: 5' CAACAGCUGGCCUGUUACUGAA 3' **||||*|**||*||||||||* miRNA: 3' --UGUCUAA-GGUCAAUGACU- 5'	no
oni-miR-8159	rna-XM_019269258.2	gene-LOC104940591	LOC104940591	tight junction protein ZO-1, transcript variant X11	1	27	164	-26.63	miRNA: 3' cgUCCC--UGUCUA-AGGUCAAUGACu 5' **||||**||||*|**||*|||||||| target: 5' agAGGGCAACAGCTGGCCTGTTACTGa 3'	2	25	-29.6	0.003326	target: 5' CAACAGCUGGCCUGUUACUGAA 3' **||||*|**||*||||||||* miRNA: 3' --UGUCUAA-GGUCAAUGACU- 5'	no
oni-miR-8159	rna-XM_010750759.3	gene-set	set	SET nuclear proto-oncogene	551	578	164	-30	miRNA: 3' cgUCCCUGU-CUAAG---GUCAAUGACu 5' |*||||:||*||*||***::|||||||: target: 5' ggAGGGGCAGGAGTCTGTTGGTTACTGg 3'	552	575	-33.5	0.000755	target: 5' GCAGGAGUCUGUUGGUUACUGGG 3' :|||:**||:***:|||||||:* miRNA: 3' UGUCUA-AGG---UCAAUGACU- 5'	no
oni-miR-8159	rna-XM_010731961.3	gene-apln	apln	apelin	6546	6569	190	-33.11	miRNA: 3' cgUCCCUGUCUAAGGUCAAUGACu 5' **|||||||||||:**|||||||: target: 5' agAGGGACAGATTTGTGTTACTGg 3'	6541	6564	-39.4	0.001804	target: 5' ACAGAUUUGUGUUACUGGU 3' |||||||:**|||||||:* miRNA: 3' UGUCUAAGGUCAAUGACU- 5'	no
oni-miR-8159	rna-XM_027285631.1	gene-LOC104920983	LOC104920983	SPRY domain-containing SOCS box protein 4, transcript variant X3	1650	1671	161	-30.86	miRNA: 3' cgucCCUGUCUAAGGUCAAUGACu 5' ****||:|||||*:**|||||||: target: 5' agcaGGGCAGATGT--GTTACTGg 3'	1649	1672	-33.1	0.00566	target: 5' G-CAGAUGU--GUUACUGGU 3' |*|||||*:**|||||||:* miRNA: 3' CUGUCUAAGGUCAAUGACU- 5'	no
oni-miR-8159	rna-XM_027289948.1	gene-myo9b	myo9b	myosin IXB, transcript variant X6	167	189	160	-27.45	miRNA: 3' cgUCCCUGUCUAAGGUCAAUGACu 5' *::|*|||*||*|||||||:|||* target: 5' atGGAGACTGA-TCCAGTTGCTGt 3'	168	191	-30	0.009406	target: 5' GACUGA-UCCAGUUGCUGU 3' |||*||*|||||||:|||* miRNA: 3' CUGUCUAAGGUCAAUGACU 5'	no
oni-miR-8159	rna-XM_019269256.2	gene-LOC104940591	LOC104940591	tight junction protein ZO-1, transcript variant X11	1	27	164	-26.63	miRNA: 3' cgUCCC--UGUCUA-AGGUCAAUGACu 5' **||||**||||*|**||*|||||||| target: 5' agAGGGCAACAGCTGGCCTGTTACTGa 3'	2	25	-29.6	0.003326	target: 5' CAACAGCUGGCCUGUUACUGAA 3' **||||*|**||*||||||||* miRNA: 3' --UGUCUAA-GGUCAAUGACU- 5'	no
oni-miR-8159	rna-XM_027289880.1	gene-wdr63	wdr63	WD repeat domain 63, transcript variant X1	163	185	168	-24.47	miRNA: 3' cgucccUGUCUAAGGUCAAUGACu 5' ||****:||||*||:||||||||| target: 5' gcttctGCAGA-TCTAGTTACTGa 3'	159	182	-33.6	0.000133	target: 5' CUUCUGCAGA-UCUAGUUACUGAG 3' *****:||||*||:|||||||||* miRNA: 3' -----UGUCUAAGGUCAAUGACU- 5'	no
oni-miR-8159	rna-XM_019269262.2	gene-LOC104940591	LOC104940591	tight junction protein ZO-1, transcript variant X11	1	27	164	-26.63	miRNA: 3' cgUCCC--UGUCUA-AGGUCAAUGACu 5' **||||**||||*|**||*|||||||| target: 5' agAGGGCAACAGCTGGCCTGTTACTGa 3'	2	25	-29.6	0.003326	target: 5' CAACAGCUGGCCUGUUACUGAA 3' **||||*|**||*||||||||* miRNA: 3' --UGUCUAA-GGUCAAUGACU- 5'	no
oni-miR-8159	rna-XM_010745920.3	gene-spata5	spata5	spermatogenesis associated 5	209	230	166	-23.09	miRNA: 3' cguCCCUGUCUAAGGUCAAUGACu 5' ***|||||*|:||:**|||||||: target: 5' tatGGGACCGGTTT--GTTACTGg 3'	211	234	-27.1	0.00713	target: 5' ACCGGUUU--GUUACUGGU 3' ||*|:||:**|||||||:* miRNA: 3' UGUCUAAGGUCAAUGACU- 5'	no
oni-miR-8159	rna-XM_027285227.1	gene-phospho1	phospho1	phosphoethanolamine/phosphocholine phosphatase, transcript variant X1	202	228	160	-23.68	miRNA: 3' cgUCCCUGUCUAAG--GU-CAAUGACu 5' **|||**|||:*||**||*|||||||| target: 5' agAGGCCCAGGCTCAGCAGGTTACTGa 3'	199	222	-29.3	0.00716	target: 5' GGCCCAGGCUCAGCAGGUUACUGAU 3' ||**|||:*||****:||||||||* miRNA: 3' CCU-GUCUAAGG---UCAAUGACU- 5'	no
oni-miR-8159	rna-XM_027285738.1	gene-tsnaxip1	tsnaxip1	translin associated factor X interacting protein 1, transcript variant X1	40	66	160	-23.58	miRNA: 3' cgUCC--CUGUCUA-AGGUCAAUGACu 5' |:|||**|||**||*||*:|||||||| target: 5' gtAGGCTGACTTATCTCAGGTTACTGa 3'	39	62	-25.7	0.004261	target: 5' CUGACUUA-UCUCAGGUUACUGAC 3' **|||**|*||:**:||||||||* miRNA: 3' --CUGUCUAAGG--UCAAUGACU- 5'	no
oni-miR-8159	rna-XM_019275412.2	gene-LOC109136678	LOC109136678	acetylcholinesterase collagenic tail peptide, transcript variant X2	223	247	177	-30.18	miRNA: 3' cgUCCC-UGUCUAAGGUCAAUGACu 5' *|||||*:|||*||:|*|||||||* target: 5' tcAGGGTGCAGTTTTCTGTTACTGt 3'	223	246	-30.1	0.005425	target: 5' UGCAGUUUUCUGUUACUGU 3' *:|||*||:|*|||||||* miRNA: 3' -UGUCUAAGGUCAAUGACU 5'	no
oni-miR-8159	rna-XM_027289944.1	gene-myo9b	myo9b	myosin IXB, transcript variant X6	167	189	160	-27.45	miRNA: 3' cgUCCCUGUCUAAGGUCAAUGACu 5' *::|*|||*||*|||||||:|||* target: 5' atGGAGACTGA-TCCAGTTGCTGt 3'	168	191	-30	0.009406	target: 5' GACUGA-UCCAGUUGCUGU 3' |||*||*|||||||:|||* miRNA: 3' CUGUCUAAGGUCAAUGACU 5'	no
oni-miR-8159	rna-XM_027272949.1	gene-LOC104940591	LOC104940591	tight junction protein ZO-1, transcript variant X11	1	27	164	-26.63	miRNA: 3' cgUCCC--UGUCUA-AGGUCAAUGACu 5' **||||**||||*|**||*|||||||| target: 5' agAGGGCAACAGCTGGCCTGTTACTGa 3'	2	25	-29.6	0.003326	target: 5' CAACAGCUGGCCUGUUACUGAA 3' **||||*|**||*||||||||* miRNA: 3' --UGUCUAA-GGUCAAUGACU- 5'	no
oni-miR-8159	rna-XM_027289950.1	gene-myo9b	myo9b	myosin IXB, transcript variant X6	167	189	160	-27.45	miRNA: 3' cgUCCCUGUCUAAGGUCAAUGACu 5' *::|*|||*||*|||||||:|||* target: 5' atGGAGACTGA-TCCAGTTGCTGt 3'	168	191	-30	0.009406	target: 5' GACUGA-UCCAGUUGCUGU 3' |||*||*|||||||:|||* miRNA: 3' CUGUCUAAGGUCAAUGACU 5'	no
oni-miR-8159	rna-XM_027286679.1	gene-LOC104934473	LOC104934473	zinc finger protein 771	23	45	162	-28.9	miRNA: 3' cgucCCUGUCUAAGGUCAAUGACu 5' ||:*||||:||**|:*|||||||| target: 5' gcgaGGACGGACGCT-GTTACTGa 3'	22	45	-30.4	0.000752	target: 5' GACGGACGCU-GUUACUGAG 3' |||:||**|:*||||||||* miRNA: 3' CUGUCUAAGGUCAAUGACU- 5'	no
oni-miR-8159	rna-XM_027285737.1	gene-tsnaxip1	tsnaxip1	translin associated factor X interacting protein 1, transcript variant X1	40	66	160	-23.58	miRNA: 3' cgUCC--CUGUCUA-AGGUCAAUGACu 5' |:|||**|||**||*||*:|||||||| target: 5' gtAGGCTGACTTATCTCAGGTTACTGa 3'	39	62	-25.7	0.004261	target: 5' CUGACUUA-UCUCAGGUUACUGAC 3' **|||**|*||:**:||||||||* miRNA: 3' --CUGUCUAAGG--UCAAUGACU- 5'	no
oni-miR-8159	rna-XM_019264646.2	gene-LOC104935713	LOC104935713	titin-like	32	59	174	-28.26	miRNA: 3' cgucCCUGUC-UAAG---GUCAAUGACu 5' |::*||||||*||||***|||||||||* target: 5' gtgtGGACAGCATTCAAACAGTTACTGt 3'	31	54	-28.9	0.004622	target: 5' GACAGCAUUCAAACAGUUACUGU 3' |||||*||||***|||||||||* miRNA: 3' CUGUC-UAAG---GUCAAUGACU 5'	no
oni-miR-8159	rna-XM_010733398.3	gene-LOC104920983	LOC104920983	SPRY domain-containing SOCS box protein 4, transcript variant X3	1650	1671	161	-30.86	miRNA: 3' cgucCCUGUCUAAGGUCAAUGACu 5' ****||:|||||*:**|||||||: target: 5' agcaGGGCAGATGT--GTTACTGg 3'	1649	1672	-33.1	0.00566	target: 5' G-CAGAUGU--GUUACUGGU 3' |*|||||*:**|||||||:* miRNA: 3' CUGUCUAAGGUCAAUGACU- 5'	no
oni-miR-8159	rna-XM_027288257.1	gene-LOC104932800	LOC104932800	ephrin type-B receptor 2, transcript variant X1	571	596	165	-20.15	miRNA: 3' cgucccUGUC--UAAGGUCAAUGACu 5' ||****||||**:||::||||||||* target: 5' gctaccACAGTTGTTTTAGTTACTGt 3'	555	578	-31.4	0.003259	target: 5' GCACAAUGCUGCUACCACAGUUGUUUUAGUUACUGU 3' |***************||||**:||::||||||||* miRNA: 3' C---------------UGUC--UAAGGUCAAUGACU 5'	no
oni-miR-8159	rna-XM_019259730.2	gene-LOC104918527	LOC104918527	UTP--glucose-1-phosphate uridylyltransferase, transcript variant X2	203	227	169	-25.29	miRNA: 3' cgUCCCUGUCUAAG-GUCAAUGACu 5' *||||||*|*|*||*|*|||||||| target: 5' tcAGGGAGAAACTCGCTGTTACTGa 3'	203	226	-26.9	0.005397	target: 5' AGAAACUCGCUGUUACUGAA 3' |*|*|*||*|*||||||||* miRNA: 3' UGUCUAAG-GUCAAUGACU- 5'	no
oni-miR-8159	rna-XM_010753580.3	gene-slc31a1	slc31a1	solute carrier family 31 member 1, transcript variant X2	905	927	188	-34.48	miRNA: 3' cgUCCCUGUCUAAGGUCAAUGACu 5' |::||||||||||*:||||||||: target: 5' gtGGGGACAGATT-TAGTTACTGg 3'	904	927	-37.8	0.000192	target: 5' GACAGAUU-UAGUUACUGGA 3' ||||||||*:||||||||:* miRNA: 3' CUGUCUAAGGUCAAUGACU- 5'	no
oni-miR-8159	rna-XM_019269254.2	gene-LOC104940591	LOC104940591	tight junction protein ZO-1, transcript variant X11	1	27	164	-26.63	miRNA: 3' cgUCCC--UGUCUA-AGGUCAAUGACu 5' **||||**||||*|**||*|||||||| target: 5' agAGGGCAACAGCTGGCCTGTTACTGa 3'	2	25	-29.6	0.003326	target: 5' CAACAGCUGGCCUGUUACUGAA 3' **||||*|**||*||||||||* miRNA: 3' --UGUCUAA-GGUCAAUGACU- 5'	no
oni-miR-8159	rna-XM_019269260.2	gene-LOC104940591	LOC104940591	tight junction protein ZO-1, transcript variant X11	1	27	164	-26.63	miRNA: 3' cgUCCC--UGUCUA-AGGUCAAUGACu 5' **||||**||||*|**||*|||||||| target: 5' agAGGGCAACAGCTGGCCTGTTACTGa 3'	2	25	-29.6	0.003326	target: 5' CAACAGCUGGCCUGUUACUGAA 3' **||||*|**||*||||||||* miRNA: 3' --UGUCUAA-GGUCAAUGACU- 5'	no
oni-miR-8159	rna-XM_027289947.1	gene-myo9b	myo9b	myosin IXB, transcript variant X6	167	189	160	-27.45	miRNA: 3' cgUCCCUGUCUAAGGUCAAUGACu 5' *::|*|||*||*|||||||:|||* target: 5' atGGAGACTGA-TCCAGTTGCTGt 3'	168	191	-30	0.009406	target: 5' GACUGA-UCCAGUUGCUGU 3' |||*||*|||||||:|||* miRNA: 3' CUGUCUAAGGUCAAUGACU 5'	no
oni-miR-8159	rna-XM_019259729.2	gene-LOC104918527	LOC104918527	UTP--glucose-1-phosphate uridylyltransferase, transcript variant X2	203	227	169	-25.29	miRNA: 3' cgUCCCUGUCUAAG-GUCAAUGACu 5' *||||||*|*|*||*|*|||||||| target: 5' tcAGGGAGAAACTCGCTGTTACTGa 3'	203	226	-26.9	0.005397	target: 5' AGAAACUCGCUGUUACUGAA 3' |*|*|*||*|*||||||||* miRNA: 3' UGUCUAAG-GUCAAUGACU- 5'	no
oni-miR-8159	rna-XM_019254875.2	gene-gal3st1	gal3st1	galactose-3-O-sulfotransferase 1	1202	1225	160	-20.27	miRNA: 3' cgucCCUGUCUAAGGUCAAUGACu 5' |***|*|::*|*||::|||||||| target: 5' ggctGCATGAAGTCTGGTTACTGa 3'	1196	1219	-31.2	0.006266	target: 5' GCUGCAUGAAGUCUGGUUACUGAA 3' |**:||*||**||::||||||||* miRNA: 3' C--UGU-CUA-AGGUCAAUGACU- 5'	no
oni-miR-8159	rna-XM_027289561.1	gene-LOC113747890	LOC113747890	uncharacterized LOC113747890	125	149	165	-25.49	miRNA: 3' cgUCCCUGUC-UAAGGUCAAUGACu 5' *:|*|*:|||*||||||||||:||: target: 5' ttATGAGCAGCATTCCAGTTATTGg 3'	130	153	-28.4	0.003373	target: 5' GCAGCAUUCCAGUUAUUGGG 3' :|||*||||||||||:||:* miRNA: 3' UGUC-UAAGGUCAAUGACU- 5'	no
oni-miR-8159	rna-XM_019269263.2	gene-LOC104940591	LOC104940591	tight junction protein ZO-1, transcript variant X11	1	27	164	-26.63	miRNA: 3' cgUCCC--UGUCUA-AGGUCAAUGACu 5' **||||**||||*|**||*|||||||| target: 5' agAGGGCAACAGCTGGCCTGTTACTGa 3'	2	25	-29.6	0.003326	target: 5' CAACAGCUGGCCUGUUACUGAA 3' **||||*|**||*||||||||* miRNA: 3' --UGUCUAA-GGUCAAUGACU- 5'	no
oni-miR-8159	rna-XM_019269252.2	gene-LOC104940591	LOC104940591	tight junction protein ZO-1, transcript variant X11	1	27	164	-26.63	miRNA: 3' cgUCCC--UGUCUA-AGGUCAAUGACu 5' **||||**||||*|**||*|||||||| target: 5' agAGGGCAACAGCTGGCCTGTTACTGa 3'	2	25	-29.6	0.003326	target: 5' CAACAGCUGGCCUGUUACUGAA 3' **||||*|**||*||||||||* miRNA: 3' --UGUCUAA-GGUCAAUGACU- 5'	no
oni-miR-8159	rna-XM_027289949.1	gene-myo9b	myo9b	myosin IXB, transcript variant X6	167	189	160	-27.45	miRNA: 3' cgUCCCUGUCUAAGGUCAAUGACu 5' *::|*|||*||*|||||||:|||* target: 5' atGGAGACTGA-TCCAGTTGCTGt 3'	168	191	-30	0.009406	target: 5' GACUGA-UCCAGUUGCUGU 3' |||*||*|||||||:|||* miRNA: 3' CUGUCUAAGGUCAAUGACU 5'	no
oni-miR-8159	rna-XM_019271963.2	gene-rft1	rft1	RFT1 homolog	32	55	162	-25.55	miRNA: 3' cgucccUGUCUAAGGUCAAUGACu 5' **:***||||:***|||||||||| target: 5' aggaaaACAGGAGACAGTTACTGa 3'	31	54	-27.6	0.00423	target: 5' AAACAGGAGACAGUUACUGAC 3' **||||:***||||||||||* miRNA: 3' --UGUCUAAGGUCAAUGACU- 5'	no
oni-miR-8159	rna-XM_019275413.2	gene-LOC109136678	LOC109136678	acetylcholinesterase collagenic tail peptide, transcript variant X2	223	247	177	-30.18	miRNA: 3' cgUCCC-UGUCUAAGGUCAAUGACu 5' *|||||*:|||*||:|*|||||||* target: 5' tcAGGGTGCAGTTTTCTGTTACTGt 3'	223	246	-30.1	0.005425	target: 5' UGCAGUUUUCUGUUACUGU 3' *:|||*||:|*|||||||* miRNA: 3' -UGUCUAAGGUCAAUGACU 5'	no
oni-miR-8159	rna-XM_019258713.2	gene-phospho1	phospho1	phosphoethanolamine/phosphocholine phosphatase, transcript variant X1	202	228	160	-23.68	miRNA: 3' cgUCCCUGUCUAAG--GU-CAAUGACu 5' **|||**|||:*||**||*|||||||| target: 5' agAGGCCCAGGCTCAGCAGGTTACTGa 3'	199	222	-29.3	0.00716	target: 5' GGCCCAGGCUCAGCAGGUUACUGAU 3' ||**|||:*||****:||||||||* miRNA: 3' CCU-GUCUAAGG---UCAAUGACU- 5'	no
ssa-miR-21a-5p	rna-XM_010738704.3	gene-surf2	surf2	surfeit 2, transcript variant X1	207	235	162	-24.66	miRNA: 3' ucaguUGUGGUCAGA-----CUAUUCGAu 5' *****|||:||||:|*****||||||||: target: 5' taaacACATCAGTTTGGCTGGATAAGCTg 3'	204	227	-28.2	0.002755	target: 5' ACACAUCAGUUUGGCUGGAUAAGCUGU 3' **|||:||||:|*****||||||||:* miRNA: 3' --UGUGGUCAGA-----CUAUUCGAU- 5'	no
ssa-miR-21a-5p	rna-XM_019276361.2	gene-brms1l	brms1l	BRMS1 like transcriptional repressor	138	160	171	-35.33	miRNA: 3' ucaGUUGUGGUCAGACUAUUCGAu 5' ***|:|||||||||*|:||||||: target: 5' cagCGACACCAGTC-GGTAAGCTg 3'	138	161	-36.1	0.002029	target: 5' ACACCAGUC-GGUAAGCUGC 3' |||||||||*|:||||||:* miRNA: 3' UGUGGUCAGACUAUUCGAU- 5'	no
ssa-miR-21a-5p	rna-XM_027284774.1	gene-LOC104918331	LOC104918331	ethanolamine-phosphate cytidylyltransferase, transcript variant X2	39	62	166	-27.25	miRNA: 3' ucAGUUGUGGUCAGACUAUUCGAu 5' ||||||||:*|**|||||:||||* target: 5' agTCAACATAACACTGATGAGCTc 3'	38	61	-31.7	0.005567	target: 5' ACAUAACACUGAUGAGCUC 3' |||:*|**|||||:||||* miRNA: 3' UGUGGUCAGACUAUUCGAU 5'	no
ssa-miR-21a-5p	rna-XM_027291253.1	gene-LOC104936109	LOC104936109	voltage-dependent R-type calcium channel subunit alpha-1E, transcript variant X4	1105	1127	167	-29.21	miRNA: 3' ucaGUUGUGGUCAGACUAUUCGAu 5' |**|||:|:|||*|||||:||||* target: 5' aaaCAATATCAG-CTGATGAGCTt 3'	1106	1129	-31.6	0.005331	target: 5' UAUCAG-CUGAUGAGCUU 3' :|:|||*|||||:||||* miRNA: 3' GUGGUCAGACUAUUCGAU 5'	no
ssa-miR-21a-5p	rna-XM_027274682.1	gene-rbks	rbks	ribokinase, transcript variant X1	1	22	163	-28.44	miRNA: 3' ucagUUGU-GGUCAGACUAUUCGAu 5' ****|:||*|*||||||||:||||: target: 5' ---gAGCAGCAAGTCTGATGAGCTg 3'	1	24	-32.7	0.000687	target: 5' GCA--AGUCUGAUGAGCUGA 3' :||**||||||||:||||:* miRNA: 3' UGUGGUCAGACUAUUCGAU- 5'	no
ssa-miR-21a-5p	rna-XM_010753515.3	gene-LOC104937310	LOC104937310	oxidative stress-induced growth inhibitor 2	545	570	168	-22.29	miRNA: 3' ucaGUUGUGGUCAG--ACUAUUCGAu 5' ***|*:|||:*|||**|||||||||| target: 5' caaCTGCACTTGTCTGTGATAAGCTa 3'	532	555	-31	0.002286	target: 5' AACAACGCAACUGCACUUGUCUGUGAUAAGCUAA 3' ************:|||:*||||**|||||||||* miRNA: 3' ------------UGUGGUCAGA--CUAUUCGAU- 5'	no
ssa-miR-21a-5p	rna-XM_010749463.3	gene-LOC104933915	LOC104933915	diphosphoinositol polyphosphate phosphohydrolase 3-beta	240	263	172	-30.87	miRNA: 3' ucagUUGUGGUCAGACUAUUCGAu 5' :|**|||:||||*|||||:||||: target: 5' ggcaAACGCCAGACTGATGAGCTg 3'	243	266	-34.5	0.003558	target: 5' CGCCAGACUGAUGAGCUGA 3' |:||||*|||||:||||:* miRNA: 3' GUGGUCAGACUAUUCGAU- 5'	no
ssa-miR-21a-5p	rna-XM_019254628.2	gene-LOC109137131	LOC109137131	coiled-coil domain-containing protein 120, transcript variant X1	595	625	164	-30.6	miRNA: 3' ucAGUUGU-GGUCAGAC------UAUUCGAu 5' ||||||*|*||||||||******|||||||: target: 5' agTCAAGATCCAGTCTGAGAGCAATAAGCTg 3'	594	617	-34.8	0.000607	target: 5' AGAUCCAGUCUGAGAGCAAUAAGCUGA 3' |*|*|||||||||******||||||:* miRNA: 3' UGU-GGUCAGACU------AUUCGAU- 5'	no
ssa-miR-21a-5p	rna-XM_010750910.3	gene-crtam	crtam	cytotoxic and regulatory T cell molecule, transcript variant X2	63	86	175	-23.6	miRNA: 3' ucAGU-UGUGGUCAGACUAUUCGAu 5' :*|||*|||:|*|*||||||||||* target: 5' gcTCACACATCTG-CTGATAAGCTt 3'	64	87	-27.1	0.002825	target: 5' ACAUCUG-CUGAUAAGCUU 3' |||:|*|*||||||||||* miRNA: 3' UGUGGUCAGACUAUUCGAU 5'	no
ssa-miR-21a-5p	rna-XM_027291246.1	gene-LOC104936109	LOC104936109	voltage-dependent R-type calcium channel subunit alpha-1E, transcript variant X4	1105	1127	167	-29.21	miRNA: 3' ucaGUUGUGGUCAGACUAUUCGAu 5' |**|||:|:|||*|||||:||||* target: 5' aaaCAATATCAG-CTGATGAGCTt 3'	1106	1129	-31.6	0.005331	target: 5' UAUCAG-CUGAUGAGCUU 3' :|:|||*|||||:||||* miRNA: 3' GUGGUCAGACUAUUCGAU 5'	no
ssa-miR-21a-5p	rna-XM_027288598.1	gene-LOC104933061	LOC104933061	uncharacterized LOC104933061, transcript variant X3	26	51	172	-26.14	miRNA: 3' ucAGUUGU-GGUCAGA-CUAUUCGAu 5' *|||||:|*||||**|*||||||||* target: 5' tgTCAATATCCAGAGTGGATAAGCTt 3'	26	49	-29.3	0.004124	target: 5' UAUCCAGAGUGGAUAAGCUU 3' :|*||||**|*||||||||* miRNA: 3' GU-GGUCAGA-CUAUUCGAU 5'	no
ssa-miR-21a-5p	rna-XM_027291250.1	gene-LOC104936109	LOC104936109	voltage-dependent R-type calcium channel subunit alpha-1E, transcript variant X4	1105	1127	167	-29.21	miRNA: 3' ucaGUUGUGGUCAGACUAUUCGAu 5' |**|||:|:|||*|||||:||||* target: 5' aaaCAATATCAG-CTGATGAGCTt 3'	1106	1129	-31.6	0.005331	target: 5' UAUCAG-CUGAUGAGCUU 3' :|:|||*|||||:||||* miRNA: 3' GUGGUCAGACUAUUCGAU 5'	no
ssa-miR-21a-5p	rna-XM_019279373.2	gene-cdh18	cdh18	cadherin 18, transcript variant X1	463	486	165	-25.62	miRNA: 3' ucaGUUGUGGUCAGACUAUUCGAu 5' *|*||*|*||||||*|||:||||* target: 5' cgaCACCTCCAGTCAGATGAGCTt 3'	462	485	-30.9	0.002591	target: 5' CACCUCCAGUCAGAUGAGCUU 3' ||||***||||*|||:||||* miRNA: 3' GUGG---UCAGACUAUUCGAU 5'	no
ssa-miR-21a-5p	rna-XM_010736382.3	gene-rbks	rbks	ribokinase, transcript variant X1	1	22	163	-28.44	miRNA: 3' ucagUUGU-GGUCAGACUAUUCGAu 5' ****|:||*|*||||||||:||||: target: 5' ---gAGCAGCAAGTCTGATGAGCTg 3'	1	24	-32.7	0.000687	target: 5' GCA--AGUCUGAUGAGCUGA 3' :||**||||||||:||||:* miRNA: 3' UGUGGUCAGACUAUUCGAU- 5'	no
ssa-miR-21a-5p	rna-XM_019279503.2	gene-crtam	crtam	cytotoxic and regulatory T cell molecule, transcript variant X2	63	86	175	-23.6	miRNA: 3' ucAGU-UGUGGUCAGACUAUUCGAu 5' :*|||*|||:|*|*||||||||||* target: 5' gcTCACACATCTG-CTGATAAGCTt 3'	64	87	-27.1	0.002825	target: 5' ACAUCUG-CUGAUAAGCUU 3' |||:|*|*||||||||||* miRNA: 3' UGUGGUCAGACUAUUCGAU 5'	no
ssa-miR-21a-5p	rna-XM_027275551.1	gene-LOC109137131	LOC109137131	coiled-coil domain-containing protein 120, transcript variant X1	595	625	164	-30.6	miRNA: 3' ucAGUUGU-GGUCAGAC------UAUUCGAu 5' ||||||*|*||||||||******|||||||: target: 5' agTCAAGATCCAGTCTGAGAGCAATAAGCTg 3'	594	617	-34.8	0.000607	target: 5' AGAUCCAGUCUGAGAGCAAUAAGCUGA 3' |*|*|||||||||******||||||:* miRNA: 3' UGU-GGUCAGACU------AUUCGAU- 5'	no
ssa-miR-21a-5p	rna-XM_027288599.1	gene-LOC104933061	LOC104933061	uncharacterized LOC104933061, transcript variant X3	26	51	172	-26.14	miRNA: 3' ucAGUUGU-GGUCAGA-CUAUUCGAu 5' *|||||:|*||||**|*||||||||* target: 5' tgTCAATATCCAGAGTGGATAAGCTt 3'	26	49	-29.3	0.004124	target: 5' UAUCCAGAGUGGAUAAGCUU 3' :|*||||**|*||||||||* miRNA: 3' GU-GGUCAGA-CUAUUCGAU 5'	no
ssa-miR-21a-5p	rna-XM_010742209.3	gene-LOC104928003	LOC104928003	neuroblastoma suppressor of tumorigenicity 1	273	299	160	-20.13	miRNA: 3' ucaGUUGUGGUCAGAC---UAUUCGAu 5' |**::||**:||||||***|||||||: target: 5' acaTGACTGTAGTCTGTTAATAAGCTg 3'	276	299	-29.1	0.003351	target: 5' CUGUAGUCUGUUAAUAAGCUGU 3' |**:||||||***|||||||:* miRNA: 3' GUGGUCAGAC---UAUUCGAU- 5'	no
ssa-miR-21a-5p	rna-XM_019262271.2	gene-LOC104936109	LOC104936109	voltage-dependent R-type calcium channel subunit alpha-1E, transcript variant X4	1105	1127	167	-29.21	miRNA: 3' ucaGUUGUGGUCAGACUAUUCGAu 5' |**|||:|:|||*|||||:||||* target: 5' aaaCAATATCAG-CTGATGAGCTt 3'	1106	1129	-31.6	0.005331	target: 5' UAUCAG-CUGAUGAGCUU 3' :|:|||*|||||:||||* miRNA: 3' GUGGUCAGACUAUUCGAU 5'	no
ssa-miR-21a-5p	rna-XM_019261061.2	gene-LOC104918331	LOC104918331	ethanolamine-phosphate cytidylyltransferase, transcript variant X2	39	62	166	-27.25	miRNA: 3' ucAGUUGUGGUCAGACUAUUCGAu 5' ||||||||:*|**|||||:||||* target: 5' agTCAACATAACACTGATGAGCTc 3'	38	61	-31.7	0.005567	target: 5' ACAUAACACUGAUGAGCUC 3' |||:*|**|||||:||||* miRNA: 3' UGUGGUCAGACUAUUCGAU 5'	no
ssa-miR-21a-5p	rna-XM_010738711.3	gene-surf2	surf2	surfeit 2, transcript variant X1	207	235	162	-24.66	miRNA: 3' ucaguUGUGGUCAGA-----CUAUUCGAu 5' *****|||:||||:|*****||||||||: target: 5' taaacACATCAGTTTGGCTGGATAAGCTg 3'	204	227	-28.2	0.002755	target: 5' ACACAUCAGUUUGGCUGGAUAAGCUGU 3' **|||:||||:|*****||||||||:* miRNA: 3' --UGUGGUCAGA-----CUAUUCGAU- 5'	no
ssa-miR-21a-5p	rna-XM_027288597.1	gene-LOC104933061	LOC104933061	uncharacterized LOC104933061, transcript variant X3	26	51	172	-26.14	miRNA: 3' ucAGUUGU-GGUCAGA-CUAUUCGAu 5' *|||||:|*||||**|*||||||||* target: 5' tgTCAATATCCAGAGTGGATAAGCTt 3'	26	49	-29.3	0.004124	target: 5' UAUCCAGAGUGGAUAAGCUU 3' :|*||||**|*||||||||* miRNA: 3' GU-GGUCAGA-CUAUUCGAU 5'	no
ssa-miR-21a-5p	rna-XM_010730051.3	gene-LOC104918331	LOC104918331	ethanolamine-phosphate cytidylyltransferase, transcript variant X2	39	62	166	-27.25	miRNA: 3' ucAGUUGUGGUCAGACUAUUCGAu 5' ||||||||:*|**|||||:||||* target: 5' agTCAACATAACACTGATGAGCTc 3'	38	61	-31.7	0.005567	target: 5' ACAUAACACUGAUGAGCUC 3' |||:*|**|||||:||||* miRNA: 3' UGUGGUCAGACUAUUCGAU 5'	no
ssa-miR-21a-5p	rna-XM_010748426.3	gene-LOC104933061	LOC104933061	uncharacterized LOC104933061, transcript variant X3	26	51	172	-26.14	miRNA: 3' ucAGUUGU-GGUCAGA-CUAUUCGAu 5' *|||||:|*||||**|*||||||||* target: 5' tgTCAATATCCAGAGTGGATAAGCTt 3'	26	49	-29.3	0.004124	target: 5' UAUCCAGAGUGGAUAAGCUU 3' :|*||||**|*||||||||* miRNA: 3' GU-GGUCAGA-CUAUUCGAU 5'	no
ssa-miR-21a-5p	rna-XM_019267556.2	gene-rbks	rbks	ribokinase, transcript variant X1	1	22	163	-28.44	miRNA: 3' ucagUUGU-GGUCAGACUAUUCGAu 5' ****|:||*|*||||||||:||||: target: 5' ---gAGCAGCAAGTCTGATGAGCTg 3'	1	24	-32.7	0.000687	target: 5' GCA--AGUCUGAUGAGCUGA 3' :||**||||||||:||||:* miRNA: 3' UGUGGUCAGACUAUUCGAU- 5'	no
ssa-miR-21a-5p	rna-XM_027288600.1	gene-LOC104933061	LOC104933061	uncharacterized LOC104933061, transcript variant X3	26	51	172	-26.14	miRNA: 3' ucAGUUGU-GGUCAGA-CUAUUCGAu 5' *|||||:|*||||**|*||||||||* target: 5' tgTCAATATCCAGAGTGGATAAGCTt 3'	26	49	-29.3	0.004124	target: 5' UAUCCAGAGUGGAUAAGCUU 3' :|*||||**|*||||||||* miRNA: 3' GU-GGUCAGA-CUAUUCGAU 5'	no
ssa-miR-21a-5p	rna-XM_019276638.2	gene-LOC104923718	LOC104923718	SLIT-ROBO Rho GTPase-activating protein 1, transcript variant X2	8	32	161	-23.14	miRNA: 3' ucAGUUGUGGUCAGAC-UAUUCGAu 5' **|*|||||::*||||*||:||||: target: 5' taTGAACACTGCTCTGAATGAGCTg 3'	9	32	-26.4	0.001233	target: 5' CACUGCUCUGAAUGAGCUGC 3' |||::*||||*||:||||:* miRNA: 3' GUGGUCAGAC-UAUUCGAU- 5'	no
ssa-miR-21a-5p	rna-XM_019279372.2	gene-cdh18	cdh18	cadherin 18, transcript variant X1	463	486	165	-25.62	miRNA: 3' ucaGUUGUGGUCAGACUAUUCGAu 5' *|*||*|*||||||*|||:||||* target: 5' cgaCACCTCCAGTCAGATGAGCTt 3'	462	485	-30.9	0.002591	target: 5' CACCUCCAGUCAGAUGAGCUU 3' ||||***||||*|||:||||* miRNA: 3' GUGG---UCAGACUAUUCGAU 5'	no
ssa-miR-7132a-5p	rna-XM_010738575.3	gene-LOC104925043	LOC104925043	pyruvate kinase PKM, transcript variant X2	806	826	173	-25.26	miRNA: 3' ugaCUCCUCGAAACUGGUUCAg 5' *|*||||*|*|||||||||||: target: 5' tcaGAGGTG-TTTGACCAAGTt 3'	808	829	-29.9	0.009232	target: 5' GUGU-UUGACCAAGUUA 3' |*|:*||||||||||:* miRNA: 3' CUCGAAACUGGUUCAG- 5'	no
ssa-miR-7132a-5p	rna-XM_010741075.3	gene-sf3b6	sf3b6	splicing factor 3b subunit 6	356	376	161	-26.78	miRNA: 3' ugaCUCCUCGAAACUGGUUCAg 5' |**||||||:|||*||||:||: target: 5' agaGAGGAGTTTT-ACCAGGTt 3'	358	379	-30.5	0.00199	target: 5' GAGUUUU-ACCAGGUUU 3' |||:|||*||||:||:* miRNA: 3' CUCGAAACUGGUUCAG- 5'	no
ssa-miR-7132a-5p	rna-XM_019263800.2	gene-LOC104925043	LOC104925043	pyruvate kinase PKM, transcript variant X2	806	826	173	-25.26	miRNA: 3' ugaCUCCUCGAAACUGGUUCAg 5' *|*||||*|*|||||||||||: target: 5' tcaGAGGTG-TTTGACCAAGTt 3'	808	829	-29.9	0.009232	target: 5' GUGU-UUGACCAAGUUA 3' |*|:*||||||||||:* miRNA: 3' CUCGAAACUGGUUCAG- 5'	no
ssa-miR-7132a-5p	rna-XM_027278043.1	gene-LOC104920651	LOC104920651	uncharacterized LOC104920651, transcript variant X3	340	361	165	-20.43	miRNA: 3' ugacuccucGAAACUGGUUCAg 5' |*|******||||||||||||: target: 5' agttcacttCTTTGACCAAGTt 3'	325	346	-29.5	0.002993	target: 5' GGAGCUCAAAGUUCACUUCUUUGACCAAGUUG 3' ||||||**************||||||||||:* miRNA: 3' CCUCGA--------------AACUGGUUCAG- 5'	no
ssa-miR-7132a-5p	rna-XM_027273285.1	gene-LOC113744309	LOC113744309	uncharacterized LOC113744309	456	476	170	-29.86	miRNA: 3' ugACUCCUCGAAACUGGUUCAg 5' :|||*||*||*||||||||||| target: 5' gcTGTGG-GCGTTGACCAAGTc 3'	455	476	-34.6	0.002177	target: 5' GG-GCGUUGACCAAGUCU 3' ||*||*|||||||||||* miRNA: 3' CCUCGAAACUGGUUCAG- 5'	no
ssa-miR-7132a-5p	rna-XM_019275756.2	gene-stard13	stard13	StAR related lipid transfer domain containing 13, transcript variant X1	1735	1756	160	-31.88	miRNA: 3' ugACUCCUCGAAACUGGUUCAg 5' :|||||*||||**|||||:||| target: 5' gcTGAGTAGCTGAGACCAGGTc 3'	1733	1754	-35.4	0.001243	target: 5' GUAGCUGAGACCAGGUCU 3' |*||||**|||||:|||* miRNA: 3' CCUCGAAACUGGUUCAG- 5'	no
ssa-miR-7132a-5p	rna-XM_010738573.3	gene-LOC104925043	LOC104925043	pyruvate kinase PKM, transcript variant X2	806	826	173	-25.26	miRNA: 3' ugaCUCCUCGAAACUGGUUCAg 5' *|*||||*|*|||||||||||: target: 5' tcaGAGGTG-TTTGACCAAGTt 3'	808	829	-29.9	0.009232	target: 5' GUGU-UUGACCAAGUUA 3' |*|:*||||||||||:* miRNA: 3' CUCGAAACUGGUUCAG- 5'	no
ssa-miR-7132a-5p	rna-XM_027289786.1	gene-stard13	stard13	StAR related lipid transfer domain containing 13, transcript variant X1	1735	1756	160	-31.88	miRNA: 3' ugACUCCUCGAAACUGGUUCAg 5' :|||||*||||**|||||:||| target: 5' gcTGAGTAGCTGAGACCAGGTc 3'	1733	1754	-35.4	0.001243	target: 5' GUAGCUGAGACCAGGUCU 3' |*||||**|||||:|||* miRNA: 3' CCUCGAAACUGGUUCAG- 5'	no
ssa-miR-7132a-5p	rna-XM_027287720.1	gene-LOC104936982	LOC104936982	ras-related protein Rab-38	1295	1316	164	-31.59	miRNA: 3' ugACUCCUCGAAACUGGUUCAg 5' *:|||||||:|**||:|||||| target: 5' ttTGAGGAGTTGAGATCAAGTc 3'	1258	1279	-33.9	0.002667	target: 5' GAGUUGAGAUCAAGUCA 3' |||:|**||:||||||* miRNA: 3' CUCGAAACUGGUUCAG- 5'	no
ssa-miR-7132a-5p	rna-XM_027278044.1	gene-LOC104920651	LOC104920651	uncharacterized LOC104920651, transcript variant X3	340	361	165	-20.43	miRNA: 3' ugacuccucGAAACUGGUUCAg 5' |*|******||||||||||||: target: 5' agttcacttCTTTGACCAAGTt 3'	325	346	-29.5	0.002993	target: 5' GGAGCUCAAAGUUCACUUCUUUGACCAAGUUG 3' ||||||**************||||||||||:* miRNA: 3' CCUCGA--------------AACUGGUUCAG- 5'	no
ssa-miR-7132a-5p	rna-XM_027285346.1	gene-LOC104925606	LOC104925606	phosphoribosyl pyrophosphate synthase-associated protein 1, transcript variant X3	2235	2256	192	-40.57	miRNA: 3' ugACUCCUCGAAACUGGUUCAg 5' |||||||||||*|||||||||| target: 5' acTGAGGAGCTATGACCAAGTc 3'	2232	2253	-43.7	0.000218	target: 5' GGAGCUAUGACCAAGUCU 3' ||||||*||||||||||* miRNA: 3' CCUCGAAACUGGUUCAG- 5'	no
ssa-miR-7132a-5p	rna-XM_019265947.2	gene-tcf20	tcf20	transcription factor 20, transcript variant X1	1631	1652	180	-32.73	miRNA: 3' ugACUCCUCGAAACUGGUUCAg 5' *:|||||||:|**||||||||| target: 5' ttTGAGGAGTTAAGACCAAGTc 3'	1630	1651	-36.1	0.003185	target: 5' GAGUUAAGACCAAGUCA 3' |||:|**|||||||||* miRNA: 3' CUCGAAACUGGUUCAG- 5'	no
ssa-miR-7132a-5p	rna-XM_010737876.3	gene-LOC104924511	LOC104924511	metalloproteinase inhibitor 3	1508	1529	173	-28.39	miRNA: 3' ugacuCCUCGAAACUGGUUCAg 5' |****|*:|||||||||||||: target: 5' aaactGTGGCTTTGACCAAGTt 3'	1495	1516	-38.5	0.000531	target: 5' GGACACAAACUGUGGCUUUGACCAAGUUA 3' |||***********|||||||||||||:* miRNA: 3' CCU-----------CGAAACUGGUUCAG- 5'	no
ssa-miR-7132a-5p	rna-XM_019275754.2	gene-stard13	stard13	StAR related lipid transfer domain containing 13, transcript variant X1	1735	1756	160	-31.88	miRNA: 3' ugACUCCUCGAAACUGGUUCAg 5' :|||||*||||**|||||:||| target: 5' gcTGAGTAGCTGAGACCAGGTc 3'	1733	1754	-35.4	0.001243	target: 5' GUAGCUGAGACCAGGUCU 3' |*||||**|||||:|||* miRNA: 3' CCUCGAAACUGGUUCAG- 5'	no
ssa-miR-7132a-5p	rna-XM_027278042.1	gene-LOC104920651	LOC104920651	uncharacterized LOC104920651, transcript variant X3	340	361	165	-20.43	miRNA: 3' ugacuccucGAAACUGGUUCAg 5' |*|******||||||||||||: target: 5' agttcacttCTTTGACCAAGTt 3'	325	346	-29.5	0.002993	target: 5' GGAGCUCAAAGUUCACUUCUUUGACCAAGUUG 3' ||||||**************||||||||||:* miRNA: 3' CCUCGA--------------AACUGGUUCAG- 5'	no
ssa-miR-7132a-5p	rna-XM_019275755.2	gene-stard13	stard13	StAR related lipid transfer domain containing 13, transcript variant X1	1735	1756	160	-31.88	miRNA: 3' ugACUCCUCGAAACUGGUUCAg 5' :|||||*||||**|||||:||| target: 5' gcTGAGTAGCTGAGACCAGGTc 3'	1733	1754	-35.4	0.001243	target: 5' GUAGCUGAGACCAGGUCU 3' |*||||**|||||:|||* miRNA: 3' CCUCGAAACUGGUUCAG- 5'	no
ssa-miR-7132a-5p	rna-XM_010750774.3	gene-crls1	crls1	cardiolipin synthase 1	112	135	169	-22.78	miRNA: 3' ugacUCCUCGAAAC--UGGUUCAg 5' ****|||||||*||**|||||||* target: 5' cgccAGGAGCTCTGAAACCAAGTa 3'	115	136	-27.5	0.007946	target: 5' GAGCUCUGAAACCAAGUA 3' |||||*|||**||||||* miRNA: 3' CUCGAAACU--GGUUCAG 5'	no
