# Supplementary material for: Comparative Transcriptomics Reveals the microRNA-Mediated Immune Response of Large Yellow Croaker (Larimichthys crocea) to Pseudomonas plecoglossicida Infection
Source: MDPI journal article supplement (doi:10.3390/fishes8010010), 2022-12-23
Supplement: s1 [file s1 › Table S11.xlsx]

## Sheet: Table S11
Table S11 GO enrichment of DEmiRNA target genes at 12 h
Gene number	GO ID	Term Type	Description	P value
1	GO:0034146	BP	toll-like receptor 5 signaling pathway	0.0294213
1	GO:0008063	BP	Toll signaling pathway	0.01482
5	GO:0080134	BP	regulation of response to stress	0.00704308
4	GO:0031347	BP	regulation of defense response	0.00190848
1	GO:0032088	BP	negative regulation of NF-kappaB transcription factor activity	0.0294213
1	GO:0031590	BP	wybutosine metabolic process	0.01482
1	GO:0031591	BP	wybutosine biosynthetic process	0.01482
4	GO:0016055	BP	Wnt signaling pathway	0.0375118
1	GO:0005248	MF	voltage-gated sodium channel activity	0.0438071
1	GO:1905030	MF	voltage-gated ion channel activity involved in regulation of postsynaptic membrane potential	0.0438071
1	GO:0007624	BP	ultradian rhythm	0.0438071
1	GO:0044390	MF	ubiquitin-like protein conjugating enzyme binding	0.01482
1	GO:0031624	MF	ubiquitin conjugating enzyme binding	0.01482
1	GO:0000379	BP	tRNA-type intron splice site recognition and cleavage	0.01482
1	GO:0000214	CC	tRNA-intron endonuclease complex	0.0438071
2	GO:0008134	MF	transcription factor binding	0.0487418
1	GO:0000812	CC	Swr1 complex	0.0294213
2	GO:0005496	MF	steroid binding	0.0451106
2	GO:0006814	BP	sodium ion transport	0.0316863
27	GO:0007165	BP	signal transduction	0.0366137
1	GO:0030904	CC	retromer complex	0.0438071
1	GO:0042974	MF	retinoic acid receptor binding	0.01482
1	GO:2000053	BP	regulation of Wnt signaling pathway involved in dorsal/ventral axis specification	0.0438071
2	GO:0032409	BP	regulation of transporter activity	0.015318
2	GO:0022898	BP	regulation of transmembrane transporter activity	0.015318
1	GO:1904356	BP	regulation of telomere maintenance via telomere lengthening	0.0294213
1	GO:0032210	BP	regulation of telomere maintenance via telomerase	0.0294213
1	GO:0032204	BP	regulation of telomere maintenance	0.0294213
2	GO:0051090	BP	regulation of sequence-specific DNA binding transcription factor activity	0.0228902
1	GO:0060330	BP	regulation of response to interferon-gamma	0.0294213
1	GO:2000622	BP	regulation of nuclear-transcribed mRNA catabolic process, nonsense-mediated decay	0.01482
1	GO:0099601	BP	regulation of neurotransmitter receptor activity	0.0438071
1	GO:0090299	BP	regulation of neural crest formation	0.0438071
1	GO:0061013	BP	regulation of mRNA catabolic process	0.0438071
7	GO:0065009	BP	regulation of molecular function	0.00227267
1	GO:2000312	BP	regulation of kainate selective glutamate receptor activity	0.0438071
2	GO:0032412	BP	regulation of ion transmembrane transporter activity	0.015318
1	GO:0060334	BP	regulation of interferon-gamma-mediated signaling pathway	0.0294213
1	GO:0043567	BP	regulation of insulin-like growth factor receptor signaling pathway	0.01482
1	GO:1900449	BP	regulation of glutamate receptor signaling pathway	0.0438071
1	GO:0010717	BP	regulation of epithelial to mesenchymal transition	0.0438071
2	GO:0006275	BP	regulation of DNA replication	0.00437269
2	GO:0051052	BP	regulation of DNA metabolic process	0.0451106
1	GO:2000278	BP	regulation of DNA biosynthetic process	0.0294213
2	GO:0001817	BP	regulation of cytokine production	0.0348691
1	GO:0031389	CC	Rad17 RFC-like complex	0.01482
1	GO:0004743	MF	pyruvate kinase activity	0.0438071
2	GO:0043101	BP	purine-containing compound salvage	0.0130881
2	GO:0032261	BP	purine nucleotide salvage	0.00577348
1	GO:0033170	MF	protein-DNA loading ATPase activity	0.0438071
1	GO:0006621	BP	protein retention in ER lumen	0.0438071
5	GO:0032446	BP	protein modification by small protein conjugation	0.0362515
2	GO:0030295	MF	protein kinase activator activity	0.0130881
1	GO:0004666	MF	prostaglandin-endoperoxide synthase activity	0.0294213
1	GO:0008475	MF	procollagen-lysine 5-dioxygenase activity	0.0294213
1	GO:1904358	BP	positive regulation of telomere maintenance via telomere lengthening	0.0294213
1	GO:0032212	BP	positive regulation of telomere maintenance via telomerase	0.0294213
1	GO:0032206	BP	positive regulation of telomere maintenance	0.0294213
1	GO:0070304	BP	positive regulation of stress-activated protein kinase signaling cascade	0.0438071
1	GO:0032874	BP	positive regulation of stress-activated MAPK cascade	0.0438071
1	GO:0046330	BP	positive regulation of JNK cascade	0.0438071
1	GO:0045740	BP	positive regulation of DNA replication	0.0294213
1	GO:2000573	BP	positive regulation of DNA biosynthetic process	0.0294213
2	GO:0007009	BP	plasma membrane organization	0.0415854
1	GO:0034597	MF	phosphatidylinositol-4,5-bisphosphate 4-phosphatase activity	0.0438071
1	GO:0070815	MF	peptidyl-lysine 5-dioxygenase activity	0.0294213
1	GO:0015440	MF	peptide-transporting ATPase activity	0.0438071
2	GO:0016706	MF	oxidoreductase activity, acting on paired donors, with incorporation or reduction of molecular oxygen, 2-oxoglutarate as one donor, and incorporation of one atom each of oxygen into both donors	0.0286259
2	GO:0008374	MF	O-acyltransferase activity	0.0202239
2	GO:0043173	BP	nucleotide salvage	0.0256923
1	GO:0048823	BP	nucleate erythrocyte development	0.0438071
1	GO:0043025	CC	neuronal cell body	0.0294213
1	GO:2000054	BP	negative regulation of Wnt signaling pathway involved in dorsal/ventral axis specification	0.0294213
1	GO:2000737	BP	negative regulation of stem cell differentiation	0.0294213
1	GO:0043433	BP	negative regulation of sequence-specific DNA binding transcription factor activity	0.0438071
1	GO:1902369	BP	negative regulation of RNA catabolic process	0.01482
5	GO:0048585	BP	negative regulation of response to stimulus	0.045494
1	GO:2000623	BP	negative regulation of nuclear-transcribed mRNA catabolic process, nonsense-mediated decay	0.01482
1	GO:0090301	BP	negative regulation of neural crest formation	0.01482
1	GO:1903312	BP	negative regulation of mRNA metabolic process	0.0294213
1	GO:1902373	BP	negative regulation of mRNA catabolic process	0.01482
2	GO:0044092	BP	negative regulation of molecular function	0.0415854
1	GO:0050728	BP	negative regulation of inflammatory response	0.0294213
1	GO:0045926	BP	negative regulation of growth	0.0438071
1	GO:0045744	BP	negative regulation of G-protein coupled receptor protein signaling pathway	0.0438071
1	GO:0010719	BP	negative regulation of epithelial to mesenchymal transition	0.01482
1	GO:0008156	BP	negative regulation of DNA replication	0.0294213
4	GO:0051093	BP	negative regulation of developmental process	0.00888141
1	GO:0048640	BP	negative regulation of developmental growth	0.0294213
12	GO:0048523	BP	negative regulation of cellular process	0.0403911
1	GO:0010771	BP	negative regulation of cell morphogenesis involved in differentiation	0.0294213
2	GO:0010721	BP	negative regulation of cell development	0.0256923
13	GO:0048519	BP	negative regulation of biological process	0.030192
1	GO:0061055	BP	myotome development	0.0294213
4	GO:0015672	BP	monovalent inorganic cation transport	0.0309994
13	GO:0098772	MF	molecular function regulator	0.0256705
1	GO:0034453	BP	microtubule anchoring	0.0294213
1	GO:0097320	BP	membrane tubulation	0.0438071
1	GO:0072595	BP	maintenance of protein localization in organelle	0.0438071
1	GO:0035437	BP	maintenance of protein localization in endoplasmic reticulum	0.0438071
2	GO:0098852	CC	lytic vacuole membrane	0.0286259
2	GO:0005765	CC	lysosomal membrane	0.0286259
3	GO:0030258	BP	lipid modification	0.0305729
1	GO:0030259	BP	lipid glycosylation	0.0294213
1	GO:0070986	BP	left/right axis specification	0.01482
2	GO:0031418	MF	L-ascorbic acid binding	0.0286259
2	GO:0019209	MF	kinase activator activity	0.0130881
1	GO:0031995	MF	insulin-like growth factor II binding	0.01482
1	GO:0031994	MF	insulin-like growth factor I binding	0.01482
3	GO:0005520	MF	insulin-like growth factor binding	0.00971277
3	GO:0045087	BP	innate immune response	0.0226507
2	GO:0032264	BP	IMP salvage	0.00577348
2	GO:0046040	BP	IMP metabolic process	0.0202239
2	GO:0006188	BP	IMP biosynthetic process	0.0202239
1	GO:0004421	MF	hydroxymethylglutaryl-CoA synthase activity	0.01482
1	GO:0050501	MF	hyaluronan synthase activity	0.0438071
1	GO:0030213	BP	hyaluronan biosynthetic process	0.0438071
1	GO:0047464	MF	heparosan-N-sulfate-glucuronate 5-epimerase activity	0.01482
3	GO:0019838	MF	growth factor binding	0.0160094
1	GO:0003923	MF	GPI-anchor transamidase activity	0.0294213
1	GO:0004883	MF	glucocorticoid receptor activity	0.0294213
1	GO:0008057	BP	eye pigment granule organization	0.01482
1	GO:0005128	MF	erythropoietin receptor binding	0.01482
1	GO:0046923	MF	ER retention sequence binding	0.0438071
1	GO:0097009	BP	energy homeostasis	0.0438071
2	GO:0009950	BP	dorsal/ventral axis specification	0.0031541
1	GO:0052925	MF	dol-P-Man:Man(5)GlcNAc(2)-PP-Dol alpha-1,3-mannosyltransferase activity	0.01482
1	GO:0004583	MF	dolichyl-phosphate-glucose-glycolipid alpha-glucosyltransferase activity	0.01482
1	GO:0003689	MF	DNA clamp loader activity	0.0438071
1	GO:0050976	BP	detection of mechanical stimulus involved in sensory perception of touch	0.01482
1	GO:0050974	BP	detection of mechanical stimulus involved in sensory perception	0.0438071
1	GO:0050982	BP	detection of mechanical stimulus	0.0438071
1	GO:0019371	BP	cyclooxygenase pathway	0.0294213
1	GO:0097602	MF	cullin family protein binding	0.0294213
1	GO:0005801	CC	cis-Golgi network	0.0438071
3	GO:0003682	MF	chromatin binding	0.0288862
1	GO:0048739	BP	cardiac muscle fiber development	0.0294213
6	GO:1901137	BP	carbohydrate derivative biosynthetic process	0.0421581
1	GO:0030877	CC	beta-catenin destruction complex	0.01482
3	GO:0009798	BP	axis specification	0.00304025
1	GO:0060088	BP	auditory receptor cell stereocilium organization	0.0294213
1	GO:0016255	BP	attachment of GPI anchor to protein	0.0438071
1	GO:0019369	BP	arachidonic acid metabolic process	0.0438071
1	GO:0000033	MF	alpha-1,3-mannosyltransferase activity	0.01482
2	GO:0008154	BP	actin polymerization or depolymerization	0.0202239
1	GO:0016038	BP	absorption of visible light	0.0438071
