# Supplementary material for: Comparative Transcriptomics Reveals the microRNA-Mediated Immune Response of Large Yellow Croaker (Larimichthys crocea) to Pseudomonas plecoglossicida Infection
Source: MDPI journal article supplement (doi:10.3390/fishes8010010), 2022-12-23
Supplement: s1 [file s1 › Table S12.xlsx]

## Sheet: Table S12
Table S12 GO enrichment of DEmiRNA target genes at 24 h
Gene number	GO ID	Term Type	Description	P value
1	GO:0008063	BP	Toll signaling pathway	0.0107493
1	GO:0032088	BP	negative regulation of NF-kappaB transcription factor activity	0.0213837
1	GO:0000187	BP	activation of MAPK activity	0.0423127
1	GO:0060005	BP	vestibular reflex	0.0319044
1	GO:0060118	BP	vestibular receptor cell development	0.0319044
7	GO:0016192	BP	vesicle-mediated transport	0.0171508
1	GO:0051748	MF	UTP-monosaccharide-1-phosphate uridylyltransferase activity	0.0213837
1	GO:0003983	MF	UTP:glucose-1-phosphate uridylyltransferase activity	0.0213837
1	GO:0006011	BP	UDP-glucose metabolic process	0.0213837
1	GO:0005689	CC	U12-type spliceosomal complex	0.0423127
1	GO:0033209	BP	tumor necrosis factor-mediated signaling pathway	0.0423127
1	GO:0045239	CC	tricarboxylic acid cycle enzyme complex	0.0319044
5	GO:0099512	CC	supramolecular fiber	0.0186542
1	GO:0016748	MF	succinyltransferase activity	0.0319044
1	GO:0016751	MF	S-succinyltransferase activity	0.0107493
2	GO:0005681	CC	spliceosomal complex	0.0487965
1	GO:0035914	BP	skeletal muscle cell differentiation	0.0423127
1	GO:0050277	MF	sedoheptulokinase activity	0.0107493
3	GO:0000377	BP	RNA splicing, via transesterification reactions with bulged adenosine as nucleophile	0.0148155
3	GO:0000375	BP	RNA splicing, via transesterification reactions	0.0148155
3	GO:0008380	BP	RNA splicing	0.0424456
1	GO:0000993	MF	RNA polymerase II core binding	0.0213837
1	GO:0043175	MF	RNA polymerase core enzyme binding	0.0319044
1	GO:0070063	MF	RNA polymerase binding	0.0319044
1	GO:0004747	MF	ribokinase activity	0.0107493
1	GO:0004745	MF	retinol dehydrogenase activity	0.0319044
1	GO:0042974	MF	retinoic acid receptor binding	0.0107493
1	GO:0060541	BP	respiratory system development	0.0107493
1	GO:0090342	BP	regulation of cell aging	0.0319044
1	GO:0060004	BP	reflex	0.0319044
1	GO:0030159	MF	receptor signaling complex scaffold activity	0.0213837
1	GO:0004743	MF	pyruvate kinase activity	0.0319044
2	GO:0009206	BP	purine ribonucleoside triphosphate biosynthetic process	0.0435736
2	GO:0009145	BP	purine nucleoside triphosphate biosynthetic process	0.0435736
1	GO:0043328	BP	protein targeting to vacuole involved in ubiquitin-dependent protein catabolic process via the multivesicular body sorting pathway	0.0213837
1	GO:0097428	BP	protein maturation by iron-sulfur cluster transfer	0.0423127
2	GO:0051604	BP	protein maturation	0.0487965
1	GO:0032947	MF	protein complex scaffold	0.0319044
1	GO:0004666	MF	prostaglandin-endoperoxide synthase activity	0.0213837
1	GO:0015450	MF	P-P-bond-hydrolysis-driven protein transmembrane transporter activity	0.0319044
1	GO:0030955	MF	potassium ion binding	0.0423127
1	GO:0043406	BP	positive regulation of MAP kinase activity	0.0423127
1	GO:0045815	BP	positive regulation of gene expression, epigenetic	0.0423127
5	GO:0099513	CC	polymeric cytoskeletal fiber	0.0186542
2	GO:0042461	BP	photoreceptor cell development	0.0124857
1	GO:0005547	MF	phosphatidylinositol-3,4,5-trisphosphate binding	0.0213837
1	GO:0006432	BP	phenylalanyl-tRNA aminoacylation	0.0319044
1	GO:0004826	MF	phenylalanine-tRNA ligase activity	0.0423127
2	GO:0004601	MF	peroxidase activity	0.0315312
1	GO:0018023	BP	peptidyl-lysine trimethylation	0.0319044
1	GO:0019321	BP	pentose metabolic process	0.0107493
1	GO:0019323	BP	pentose catabolic process	0.0107493
1	GO:0033270	CC	paranode region of axon	0.0213837
1	GO:0030913	BP	paranodal junction assembly	0.0107493
1	GO:0045252	CC	oxoglutarate dehydrogenase complex	0.0107493
2	GO:0016684	MF	oxidoreductase activity, acting on peroxide as acceptor	0.0487965
1	GO:0031628	MF	opioid receptor binding	0.0319044
5	GO:0060589	MF	nucleoside-triphosphatase regulator activity	0.00668643
3	GO:0048666	BP	neuron development	0.0212848
1	GO:0021915	BP	neural tube development	0.0107493
1	GO:0001840	BP	neural plate development	0.0213837
1	GO:0043433	BP	negative regulation of sequence-specific DNA binding transcription factor activity	0.0319044
1	GO:0045926	BP	negative regulation of growth	0.0319044
1	GO:0030308	BP	negative regulation of cell growth	0.0213837
3	GO:0000398	BP	mRNA splicing, via spliceosome	0.0148155
1	GO:0046365	BP	monosaccharide catabolic process	0.0213837
10	GO:0098772	MF	molecular function regulator	0.0309296
1	GO:0070584	BP	mitochondrion morphogenesis	0.0319044
1	GO:0000275	CC	mitochondrial proton-transporting ATP synthase complex, catalytic core F(1)	0.0107493
1	GO:0005744	CC	mitochondrial inner membrane presequence translocase complex	0.0423127
1	GO:0055071	BP	manganese ion homeostasis	0.0213837
1	GO:0032511	BP	late endosome to vacuole transport via multivesicular body sorting pathway	0.0213837
1	GO:0045324	BP	late endosome to vacuole transport	0.0423127
3	GO:0005882	CC	intermediate filament	0.0202802
1	GO:0050501	MF	hyaluronan synthase activity	0.0319044
1	GO:0030213	BP	hyaluronan biosynthetic process	0.0319044
1	GO:0046975	MF	histone methyltransferase activity (H3-K36 specific)	0.0107493
1	GO:0097198	BP	histone H3-K36 trimethylation	0.0107493
1	GO:0010452	BP	histone H3-K36 methylation	0.0107493
2	GO:0003015	BP	heart process	0.0435736
2	GO:0060047	BP	heart contraction	0.0385765
5	GO:0030695	MF	GTPase regulator activity	0.00467293
5	GO:0005096	MF	GTPase activator activity	0.00313349
3	GO:0001664	MF	G-protein coupled receptor binding	0.0367797
1	GO:0090665	CC	glycoprotein complex	0.0423127
1	GO:0001733	MF	galactosylceramide sulfotransferase activity	0.0423127
1	GO:0006012	BP	galactose metabolic process	0.0319044
1	GO:0005534	MF	galactose binding	0.0213837
1	GO:0050694	MF	galactose 3-O-sulfotransferase activity	0.0423127
1	GO:0004335	MF	galactokinase activity	0.0213837
2	GO:0042462	BP	eye photoreceptor cell development	0.0124857
1	GO:0000814	CC	ESCRT II complex	0.0319044
1	GO:0003381	BP	epithelial cell morphogenesis involved in gastrulation	0.0107493
1	GO:0003382	BP	epithelial cell morphogenesis	0.0107493
8	GO:0030234	MF	enzyme regulator activity	0.0276701
5	GO:0008047	MF	enzyme activator activity	0.0162244
1	GO:0016010	CC	dystrophin-associated glycoprotein complex	0.0423127
1	GO:0006014	BP	D-ribose metabolic process	0.0107493
1	GO:0019303	BP	D-ribose catabolic process	0.0107493
1	GO:0052824	MF	dolichyl-pyrophosphate Man7GlcNAc2 alpha-1,6-mannosyltransferase activity	0.0107493
1	GO:0004149	MF	dihydrolipoyllysine-residue succinyltransferase activity	0.0107493
1	GO:0045240	CC	dihydrolipoyl dehydrogenase complex	0.0107493
2	GO:0009583	BP	detection of light stimulus	0.0435736
1	GO:0007016	BP	cytoskeletal anchoring at plasma membrane	0.0423127
1	GO:0019371	BP	cyclooxygenase pathway	0.0213837
1	GO:0051424	MF	corticotropin-releasing hormone binding	0.0213837
1	GO:0005375	MF	copper ion transmembrane transporter activity	0.0213837
1	GO:0005801	CC	cis-Golgi network	0.0319044
1	GO:0048096	BP	chromatin-mediated maintenance of transcription	0.0107493
2	GO:0010927	BP	cellular component assembly involved in morphogenesis	0.0461576
2	GO:0019200	MF	carbohydrate kinase activity	0.0210975
8	GO:1901135	BP	carbohydrate derivative metabolic process	0.0236284
5	GO:1901137	BP	carbohydrate derivative biosynthetic process	0.0374602
1	GO:0071586	BP	CAAX-box protein processing	0.0213837
1	GO:0001825	BP	blastocyst formation	0.0107493
1	GO:0001098	MF	basal transcription machinery binding	0.0213837
1	GO:0001099	MF	basal RNA polymerase II transcription machinery binding	0.0213837
2	GO:0006754	BP	ATP biosynthetic process	0.0293092
1	GO:0019369	BP	arachidonic acid metabolic process	0.0319044
1	GO:0031704	MF	apelin receptor binding	0.0107493
1	GO:0031145	BP	anaphase-promoting complex-dependent catabolic process	0.0423127
1	GO:0015696	BP	ammonium transport	0.0107493
1	GO:0072488	BP	ammonium transmembrane transport	0.0107493
1	GO:0000009	MF	alpha-1,6-mannosyltransferase activity	0.0107493
1	GO:0031420	MF	alkali metal ion binding	0.0423127
6	GO:0022804	MF	active transmembrane transporter activity	0.0276811
