# Supplementary material for: Comparative Transcriptomics Reveals the microRNA-Mediated Immune Response of Large Yellow Croaker (Larimichthys crocea) to Pseudomonas plecoglossicida Infection
Source: MDPI journal article supplement (doi:10.3390/fishes8010010), 2022-12-23
Supplement: s1 [file s1 › Table S13.xlsx]

## Sheet: 基因集Kegg分类统计表 (2) ba12
Table S13 KEGG annotation of DEmiRNA target genes at 12 h and 24 h
First Category	Second Category	pathway ID	Description	Target gene number at 12 h	Target gene number at 24 h
Human Diseases	Infectious diseases: Viral	map05165	Human papillomavirus infection	10	7
Cellular Processes	Transport and catabolism	map04144	Endocytosis	8	5
Human Diseases	Cancers: Specific types	map05225	Hepatocellular carcinoma	6	1
Human Diseases	Cancers: Specific types	map05226	Gastric cancer	6	1
Human Diseases	Infectious diseases: Viral	map05167	Kaposi sarcoma-associated herpesvirus infection	6	4
Human Diseases	Infectious diseases: Viral	map05163	Human cytomegalovirus infection	6	2
Human Diseases	Endocrine and metabolic diseases	map04934	Cushing syndrome	6	2
Metabolism	Lipid metabolism	map00564	Glycerophospholipid metabolism	5	4
Metabolism	Nucleotide metabolism	map00230	Purine metabolism	5	2
Environmental Information Processing	Signal transduction	map04070	Phosphatidylinositol signaling system	5	3
Metabolism	Carbohydrate metabolism	map00562	Inositol phosphate metabolism	4	3
Metabolism	Amino acid metabolism	map00280	Valine, leucine and isoleucine degradation	4	2
Metabolism	Glycan biosynthesis and metabolism	map00513	Various types of N-glycan biosynthesis	4	1
Genetic Information Processing	Folding, sorting and degradation	map04141	Protein processing in endoplasmic reticulum	4	2
Cellular Processes	Transport and catabolism	map04145	Phagosome	4	3
Cellular Processes	Cell growth and death	map04218	Cellular senescence	4	0
Metabolism	Lipid metabolism	map00561	Glycerolipid metabolism	3	1
Metabolism	Glycan biosynthesis and metabolism	map00510	N-Glycan biosynthesis	3	1
Metabolism	Lipid metabolism	map00590	Arachidonic acid metabolism	3	2
Genetic Information Processing	Folding, sorting and degradation	map04120	Ubiquitin mediated proteolysis	3	1
Genetic Information Processing	Translation	map03013	RNA transport	3	0
Genetic Information Processing	Translation	map03015	mRNA surveillance pathway	3	0
Genetic Information Processing	Folding, sorting and degradation	map03018	RNA degradation	3	1
Human Diseases	Endocrine and metabolic diseases	map04933	AGE-RAGE signaling pathway in diabetic complications	3	0
Metabolism	Amino acid metabolism	map00310	Lysine degradation	2	4
Metabolism	Lipid metabolism	map00565	Ether lipid metabolism	2	2
Metabolism	Glycan biosynthesis and metabolism	map00563	Glycosylphosphatidylinositol (GPI)-anchor biosynthesis	2	0
Metabolism	Lipid metabolism	map00591	Linoleic acid metabolism	2	0
Metabolism	Lipid metabolism	map00592	alpha-Linolenic acid metabolism	2	0
Metabolism	Energy metabolism	map00190	Oxidative phosphorylation	2	1
Metabolism	Carbohydrate metabolism	map00620	Pyruvate metabolism	2	1
Metabolism	Carbohydrate metabolism	map00010	Glycolysis / Gluconeogenesis	2	1
Genetic Information Processing	Transcription	map03040	Spliceosome	2	3
Genetic Information Processing	Translation	map03008	Ribosome biogenesis in eukaryotes	2	1
Genetic Information Processing	Replication and repair	map03430	Mismatch repair	2	0
Genetic Information Processing	Replication and repair	map03030	DNA replication	2	0
Cellular Processes	Cell growth and death	map04111	Cell cycle - yeast	2	1
Cellular Processes	Cell growth and death	map04113	Meiosis - yeast	2	1
Organismal Systems	Endocrine system	map04927	Cortisol synthesis and secretion	2	1
Organismal Systems	Endocrine system	map04926	Relaxin signaling pathway	2	0
Organismal Systems	Immune system	map04625	C-type lectin receptor signaling pathway	2	2
Metabolism	Lipid metabolism	map00071	Fatty acid degradation	1	1
Metabolism	Metabolism of other amino acids	map00410	beta-Alanine metabolism	1	0
Metabolism	Carbohydrate metabolism	map00650	Butanoate metabolism	1	0
Metabolism	Lipid metabolism	map00072	Synthesis and degradation of ketone bodies	1	0
Metabolism	Amino acid metabolism	map00380	Tryptophan metabolism	1	0
Metabolism	Lipid metabolism	map00062	Fatty acid elongation	1	0
Metabolism	Carbohydrate metabolism	map00053	Ascorbate and aldarate metabolism	1	1
Metabolism	Lipid metabolism	map00600	Sphingolipid metabolism	1	1
Metabolism	Energy metabolism	map00910	Nitrogen metabolism	1	0
Metabolism	Glycan biosynthesis and metabolism	map00514	Other types of O-glycan biosynthesis	1	0
Metabolism	Lipid metabolism	map00100	Steroid biosynthesis	1	2
Metabolism	Carbohydrate metabolism	map00020	Citrate cycle (TCA cycle)	1	1
Metabolism	Metabolism of terpenoids and polyketides	map00900	Terpenoid backbone biosynthesis	1	2
Metabolism	Amino acid metabolism	map00340	Histidine metabolism	1	0
Metabolism	Amino acid metabolism	map00330	Arginine and proline metabolism	1	1
Metabolism	Glycan biosynthesis and metabolism	map00531	Glycosaminoglycan degradation	1	0
Metabolism	Lipid metabolism	map01040	Biosynthesis of unsaturated fatty acids	1	0
Metabolism	Carbohydrate metabolism	map00520	Amino sugar and nucleotide sugar metabolism	1	3
Metabolism	Nucleotide metabolism	map00240	Pyrimidine metabolism	1	1
Metabolism	Carbohydrate metabolism	map00640	Propanoate metabolism	1	1
Genetic Information Processing	Folding, sorting and degradation	map04130	SNARE interactions in vesicular transport	1	2
Genetic Information Processing	Replication and repair	map03420	Nucleotide excision repair	1	0
Genetic Information Processing	Transcription	map03020	RNA polymerase	1	0
Genetic Information Processing	Replication and repair	map03440	Homologous recombination	1	0
Environmental Information Processing	Signal transduction	map04392	Hippo signaling pathway - multiple species	1	0
Environmental Information Processing	Signal transduction	map04011	MAPK signaling pathway - yeast	1	1
Environmental Information Processing	Membrane transport	map02010	ABC transporters	1	0
Cellular Processes	Transport and catabolism	map04139	Mitophagy - yeast	1	1
Cellular Processes	Cell growth and death	map04217	Necroptosis	1	2
Organismal Systems	Endocrine system	map04928	Parathyroid hormone synthesis, secretion and action	1	0
Organismal Systems	Digestive system	map04979	Cholesterol metabolism	1	1
Organismal Systems	Environmental adaptation	map04714	Thermogenesis	1	1
Organismal Systems	Aging	map04213	Longevity regulating pathway - multiple species	1	0
Metabolism	Metabolism of cofactors and vitamins	map00860	Porphyrin and chlorophyll metabolism	0	1
Metabolism	Amino acid metabolism	map00270	Cysteine and methionine metabolism	0	1
Metabolism	Carbohydrate metabolism	map00040	Pentose and glucuronate interconversions	0	2
Metabolism	Carbohydrate metabolism	map00052	Galactose metabolism	0	2
Metabolism	Metabolism of cofactors and vitamins	map00760	Nicotinate and nicotinamide metabolism	0	1
Metabolism	Metabolism of other amino acids	map00440	Phosphonate and phosphinate metabolism	0	1
Metabolism	Amino acid metabolism	map00360	Phenylalanine metabolism	0	1
Metabolism	Amino acid metabolism	map00350	Tyrosine metabolism	0	1
Metabolism	Metabolism of other amino acids	map00450	Selenocompound metabolism	0	1
Metabolism	Metabolism of cofactors and vitamins	map00130	Ubiquinone and other terpenoid-quinone biosynthesis	0	1
Metabolism	Carbohydrate metabolism	map00500	Starch and sucrose metabolism	0	1
Metabolism	Carbohydrate metabolism	map00030	Pentose phosphate pathway	0	1
Metabolism	Metabolism of other amino acids	map00480	Glutathione metabolism	0	1
Metabolism	Amino acid metabolism	map00400	Phenylalanine, tyrosine and tryptophan biosynthesis	0	1
Genetic Information Processing	Translation	map00970	Aminoacyl-tRNA biosynthesis	0	1
Genetic Information Processing	Translation	map03010	Ribosome	0	1
