# Supplementary material for: Comparative Transcriptomics Reveals the microRNA-Mediated Immune Response of Large Yellow Croaker (Larimichthys crocea) to Pseudomonas plecoglossicida Infection
Source: MDPI journal article supplement (doi:10.3390/fishes8010010), 2022-12-23
Supplement: s1 [file s1 › Table S14.xlsx]

## Sheet: GO富集分析统计表DEM11
Table S14 GO enrichment of DEmRNA at 12 h
DEmRNA Number	GO ID	Term Type	Description	P value	Transcript ID
2	GO:0005153	MF	interleukin-8 receptor binding	0.00181522	rna-NM_001303343.1;rna-XM_010737667.3
2	GO:0045236	MF	CXCR chemokine receptor binding	0.00181522	rna-NM_001303343.1;rna-XM_010737667.3
4	GO:0005764	CC	lysosome	0.00934388	rna-XM_010746750.3;rna-XM_027281724.1;rna-XM_019266527.2;rna-XM_010734670.3
3	GO:0002274	BP	myeloid leukocyte activation	0.000285074	rna-NM_001303343.1;rna-XM_019267198.2;rna-XM_010737667.3
2	GO:0032873	BP	negative regulation of stress-activated MAPK cascade	0.000309741	rna-XM_027284222.1;rna-XM_027284221.1
5	GO:0060326	BP	cell chemotaxis	0.0010272	rna-XM_027275460.1;rna-NM_001303343.1;rna-XM_010737667.3;rna-XM_019267430.2;rna-XM_019267198.2
2	GO:0042119	BP	neutrophil activation	0.00181522	rna-NM_001303343.1;rna-XM_010737667.3
2	GO:0036230	BP	granulocyte activation	0.00181522	rna-NM_001303343.1;rna-XM_010737667.3
4	GO:0030595	BP	leukocyte chemotaxis	0.00397099	rna-XM_027275460.1;rna-NM_001303343.1;rna-XM_019267198.2;rna-XM_010737667.3
11	GO:0051707	BP	response to other organism	0.00509877	rna-XM_027281724.1;rna-XM_010739929.3;rna-XM_027276028.1;rna-XM_010749062.3;rna-XM_019274882.2;rna-XM_027274118.1;rna-XM_010738293.3;rna-XM_010744837.3;rna-XM_010740584.3;rna-XM_010740729.3;rna-XM_019267198.2
11	GO:0043207	BP	response to external biotic stimulus	0.00556426	rna-XM_027281724.1;rna-XM_010739929.3;rna-XM_027276028.1;rna-XM_010749062.3;rna-XM_019274882.2;rna-XM_027274118.1;rna-XM_010738293.3;rna-XM_010744837.3;rna-XM_010740584.3;rna-XM_010740729.3;rna-XM_019267198.2
11	GO:0009607	BP	response to biotic stimulus	0.00572666	rna-XM_027281724.1;rna-XM_010739929.3;rna-XM_027276028.1;rna-XM_010749062.3;rna-XM_019274882.2;rna-XM_027274118.1;rna-XM_010738293.3;rna-XM_010744837.3;rna-XM_010740584.3;rna-XM_010740729.3;rna-XM_019267198.2
2	GO:0043409	BP	negative regulation of MAPK cascade	0.00613374	rna-XM_027284222.1;rna-XM_027284221.1
4	GO:0050900	BP	leukocyte migration	0.00741091	rna-XM_027275460.1;rna-NM_001303343.1;rna-XM_019267198.2;rna-XM_010737667.3
3	GO:0030593	BP	neutrophil chemotaxis	0.00835684	rna-XM_027275460.1;rna-NM_001303343.1;rna-XM_010737667.3
3	GO:1990266	BP	neutrophil migration	0.01046	rna-XM_027275460.1;rna-NM_001303343.1;rna-XM_010737667.3
3	GO:0071621	BP	granulocyte chemotaxis	0.011616	rna-XM_027275460.1;rna-NM_001303343.1;rna-XM_010737667.3
3	GO:0097530	BP	granulocyte migration	0.0141403	rna-XM_027275460.1;rna-NM_001303343.1;rna-XM_010737667.3
6	GO:0009617	BP	response to bacterium	0.0169907	rna-XM_027281724.1;rna-XM_027276028.1;rna-XM_010739929.3;rna-XM_019267198.2;rna-XM_010740584.3;rna-XM_010744837.3
1	GO:0002281	BP	macrophage activation involved in immune response	0.0176135	rna-XM_019267198.2
1	GO:0002366	BP	leukocyte activation involved in immune response	0.0176135	rna-XM_019267198.2
1	GO:0002263	BP	cell activation involved in immune response	0.0176135	rna-XM_019267198.2
1	GO:0002275	BP	myeloid cell activation involved in immune response	0.0176135	rna-XM_019267198.2
2	GO:0071466	BP	cellular response to xenobiotic stimulus	0.0393357	rna-XM_010750976.3;rna-NM_001303362.1
2	GO:0032526	BP	response to retinoic acid	0.0393357	rna-XM_010749598.3;rna-XM_027289585.1
3	GO:0045321	BP	leukocyte activation	0.0422766	rna-NM_001303343.1;rna-XM_019267198.2;rna-XM_010737667.3
3	GO:0031349	BP	positive regulation of defense response	0.0422766	rna-XM_010739929.3;rna-XM_010740584.3;rna-XM_019274882.2
9	GO:0006952	BP	defense response	0.0467073	rna-NM_001303343.1;rna-XM_010749062.3;rna-XM_019274882.2;rna-XM_010737667.3;rna-XM_010739929.3;rna-XM_010738293.3;rna-XM_010744837.3;rna-XM_010740584.3;rna-XM_010740729.3
9	GO:0005344	MF	oxygen carrier activity	6.52334e-07	rna-XM_010730520.3;rna-XM_027285443.1;rna-XM_019252854.2;rna-XM_010730519.3;rna-XM_010730796.3;rna-XM_027288305.1;rna-XM_019252859.2;rna-NM_001303359.1;rna-XM_027285438.1
9	GO:0019825	MF	oxygen binding	6.52334e-07	rna-XM_010730520.3;rna-XM_027285443.1;rna-XM_019252854.2;rna-XM_010730519.3;rna-XM_010730796.3;rna-XM_027288305.1;rna-XM_019252859.2;rna-NM_001303359.1;rna-XM_027285438.1
13	GO:0016810	MF	hydrolase activity, acting on carbon-nitrogen (but not peptide) bonds	4.45602e-05	rna-XM_019262606.2;rna-XM_027277132.1;rna-XM_010729344.3;rna-XM_019266527.2;rna-XM_027272586.1;rna-XM_010756843.3;rna-XM_027277486.1;rna-XM_027277482.1;rna-XM_010744837.3;rna-XM_027278358.1;rna-XM_010756593.3;rna-XM_019272559.2;rna-XM_010735334.3
113	GO:0016787	MF	hydrolase activity	0.000303627	rna-XM_019262606.2;rna-XM_010729344.3;rna-XM_019259517.2;rna-XM_010757288.3;rna-XM_027290262.1;rna-XM_027289829.1;rna-XM_010746112.3;rna-XM_027283780.1;rna-XM_019267226.2;rna-XM_027286823.1;rna-XM_010740122.3;rna-XM_019275489.2;rna-XM_010756843.3;rna-XM_027280244.1;rna-XM_027277902.1;rna-XM_027274505.1;rna-XM_027290790.1;rna-XM_010745885.3;rna-XM_019258357.2;rna-XM_019266762.2;rna-XM_010733280.3;…
8	GO:0016811	MF	hydrolase activity, acting on carbon-nitrogen (but not peptide) bonds, in linear amides	0.000425761	rna-XM_019262606.2;rna-XM_027277132.1;rna-XM_019266527.2;rna-XM_027272586.1;rna-XM_027277486.1;rna-XM_027277482.1;rna-XM_010744837.3;rna-XM_019272559.2
5	GO:0004407	MF	histone deacetylase activity	0.000740193	rna-XM_019262606.2;rna-XM_027277486.1;rna-XM_019272559.2;rna-XM_027277482.1;rna-XM_027272586.1
5	GO:0017136	MF	NAD-dependent histone deacetylase activity	0.000740193	rna-XM_019262606.2;rna-XM_027277486.1;rna-XM_019272559.2;rna-XM_027277482.1;rna-XM_027272586.1
2	GO:0035673	MF	oligopeptide transmembrane transporter activity	0.000918345	rna-NM_001303366.1;rna-XM_027291348.1
2	GO:0102008	MF	cytosolic dipeptidase activity	0.000918345	rna-XM_027287123.1;rna-XM_010741687.3
2	GO:0103046	MF	alanylglutamate dipeptidase activity	0.000918345	rna-XM_027287123.1;rna-XM_010741687.3
8	GO:0008514	MF	organic anion transmembrane transporter activity	0.00118893	rna-NM_001303366.1;rna-XM_019264503.2;rna-XM_027289409.1;rna-XM_027291348.1;rna-XM_019267792.2;rna-XM_027280065.1;rna-XM_010757234.3;rna-XM_010738966.3
15	GO:0017016	MF	Ras GTPase binding	0.00157077	rna-XM_010736392.3;rna-XM_019273722.2;rna-XM_027290057.1;rna-XM_027279007.1;rna-XR_002042586.2;rna-XM_019272167.2;rna-XM_019271143.2;rna-XM_019264785.2;rna-XM_027282854.1;rna-XR_003463801.1;rna-XM_027274029.1;rna-XM_010747815.3;rna-XM_027290590.1;rna-XM_027274028.1;rna-XM_027285408.1
9	GO:0008238	MF	exopeptidase activity	0.00170431	rna-XM_027283692.1;rna-XM_010757288.3;rna-XM_010746112.3;rna-XM_010741687.3;rna-XM_010741905.3;rna-XM_027273013.1;rna-XM_027287123.1;rna-XM_019266118.2;rna-XM_010734391.3
15	GO:0031267	MF	small GTPase binding	0.00170597	rna-XM_010736392.3;rna-XM_019273722.2;rna-XM_027290057.1;rna-XM_027279007.1;rna-XR_002042586.2;rna-XM_019272167.2;rna-XM_019271143.2;rna-XM_019264785.2;rna-XM_027282854.1;rna-XR_003463801.1;rna-XM_027274029.1;rna-XM_010747815.3;rna-XM_027290590.1;rna-XM_027274028.1;rna-XM_027285408.1
2	GO:0017040	MF	N-acylsphingosine amidohydrolase activity	0.00181522	rna-XM_019266527.2;rna-XM_027277132.1
5	GO:0033558	MF	protein deacetylase activity	0.00183807	rna-XM_019262606.2;rna-XM_027277486.1;rna-XM_019272559.2;rna-XM_027277482.1;rna-XM_027272586.1
5	GO:0034979	MF	NAD-dependent protein deacetylase activity	0.00183807	rna-XM_019262606.2;rna-XM_027277486.1;rna-XM_019272559.2;rna-XM_027277482.1;rna-XM_027272586.1
3	GO:0005007	MF	fibroblast growth factor-activated receptor activity	0.00211267	rna-XM_010739292.3;rna-XM_010739275.3;rna-XM_010730838.3
7	GO:0004714	MF	transmembrane receptor protein tyrosine kinase activity	0.00275971	rna-XM_010739275.3;rna-XM_027273931.1;rna-XM_010739292.3;rna-XM_019267430.2;rna-XM_019253967.2;rna-XM_010730838.3;rna-XM_019277690.2
5	GO:0019213	MF	deacetylase activity	0.00280866	rna-XM_019262606.2;rna-XM_027277486.1;rna-XM_019272559.2;rna-XM_027277482.1;rna-XM_027272586.1
4	GO:0031078	MF	histone deacetylase activity (H3-K14 specific)	0.00323649	rna-XM_019262606.2;rna-XM_027277486.1;rna-XM_019272559.2;rna-XM_027277482.1
4	GO:0032041	MF	NAD-dependent histone deacetylase activity (H3-K14 specific)	0.00323649	rna-XM_019262606.2;rna-XM_027277486.1;rna-XM_019272559.2;rna-XM_027277482.1
10	GO:0020037	MF	heme binding	0.0035089	rna-XM_010730519.3;rna-XM_027285443.1;rna-XM_019252854.2;rna-XM_010730520.3;rna-XM_010730796.3;rna-XM_027288305.1;rna-XM_019252859.2;rna-NM_001303359.1;rna-XM_027285438.1;rna-NM_001303362.1
10	GO:0046906	MF	tetrapyrrole binding	0.00430211	rna-XM_010730519.3;rna-XM_027285443.1;rna-XM_019252854.2;rna-XM_010730520.3;rna-XM_010730796.3;rna-XM_027288305.1;rna-XM_019252859.2;rna-NM_001303359.1;rna-XM_027285438.1;rna-NM_001303362.1
18	GO:0051020	MF	GTPase binding	0.00549103	rna-XM_010736392.3;rna-XM_019273722.2;rna-XM_027290057.1;rna-XM_027279007.1;rna-XR_002042586.2;rna-XM_019272167.2;rna-XM_019271143.2;rna-XM_019264785.2;rna-XM_027282854.1;rna-XM_027285408.1;rna-XM_019273906.2;rna-XR_003463801.1;rna-XM_027274029.1;rna-XM_010747815.3;rna-XM_027277530.1;rna-XM_027290590.1;rna-XM_027274028.1;rna-XM_010735622.3
6	GO:0005342	MF	organic acid transmembrane transporter activity	0.0061008	rna-NM_001303366.1;rna-XM_019264503.2;rna-XM_027289409.1;rna-XM_019267792.2;rna-XM_010757234.3;rna-XM_027291348.1
2	GO:0008761	MF	UDP-N-acetylglucosamine 2-epimerase activity	0.00613374	rna-XM_019259517.2;rna-XM_019259522.2
3	GO:0016805	MF	dipeptidase activity	0.00652599	rna-XM_027287123.1;rna-XM_019266118.2;rna-XM_010741687.3
8	GO:0019199	MF	transmembrane receptor protein kinase activity	0.00739738	rna-XM_010735358.3;rna-XM_010739275.3;rna-XM_027273931.1;rna-XM_010739292.3;rna-XM_019267430.2;rna-XM_019253967.2;rna-XM_010730838.3;rna-XM_019277690.2
10	GO:0017048	MF	Rho GTPase binding	0.00824101	rna-XM_010736392.3;rna-XM_019273722.2;rna-XM_027290057.1;rna-XM_027279007.1;rna-XM_019271143.2;rna-XM_019264785.2;rna-XM_027282854.1;rna-XR_003463801.1;rna-XM_010747815.3;rna-XM_027290590.1
4	GO:0008536	MF	Ran GTPase binding	0.00934388	rna-XM_027274029.1;rna-XR_002042586.2;rna-XM_027274028.1;rna-XM_027285408.1
44	GO:0098772	MF	molecular function regulator	0.00968678	rna-XM_010737876.3;rna-XM_027283945.1;rna-XM_019256898.2;rna-XM_010729992.3;rna-XM_019256989.2;rna-XM_019271143.2;rna-XM_010747835.3;rna-XM_010733297.3;rna-XM_019279064.2;rna-XM_019273906.2;rna-XM_010729993.3;rna-NM_001303343.1;rna-XM_010754553.3;rna-XM_027272523.1;rna-XM_019273722.2;rna-XM_027290057.1;rna-XM_010742229.3;rna-XM_027290170.1;rna-XM_010737667.3;rna-XM_027285785.1;rna-XM_019255171.2;…
2	GO:0051184	MF	cofactor transmembrane transporter activity	0.0126916	rna-XM_019264503.2;rna-XM_019267588.2
2	GO:0015175	MF	neutral amino acid transmembrane transporter activity	0.0126916	rna-NM_001303366.1;rna-XM_027291348.1
2	GO:0005160	MF	transforming growth factor beta receptor binding	0.0126916	rna-XM_010735248.3;rna-XM_010733855.3
5	GO:0046943	MF	carboxylic acid transmembrane transporter activity	0.0135871	rna-XM_019264503.2;rna-NM_001303366.1;rna-XM_010757234.3;rna-XM_027291348.1;rna-XM_027289409.1
31	GO:0070011	MF	peptidase activity, acting on L-amino acid peptides	0.013965	rna-XM_010757288.3;rna-XM_027274505.1;rna-XM_027287123.1;rna-XM_010746112.3;rna-XM_010730579.3;rna-XM_027283692.1;rna-XM_019277120.2;rna-XM_010732314.3;rna-XM_019266981.2;rna-XM_027286823.1;rna-XM_027275992.1;rna-XM_010741687.3;rna-XM_027273013.1;rna-XM_027282968.1;rna-XM_027277902.1;rna-XM_027281724.1;rna-XM_019258357.2;rna-XM_027280478.1;rna-XM_027281512.1;rna-XM_010741905.3;rna-XM_010740729.3;…
12	GO:0005096	MF	GTPase activator activity	0.0144298	rna-XM_019256898.2;rna-XM_010729992.3;rna-XM_019256989.2;rna-XM_027290170.1;rna-XM_010747835.3;rna-XM_010733297.3;rna-XM_010729993.3;rna-XM_027288602.1;rna-XM_027285785.1;rna-XM_019255171.2;rna-XM_010732802.3;rna-XM_019255170.2
8	GO:0004553	MF	hydrolase activity, hydrolyzing O-glycosyl compounds	0.0148678	rna-XM_019272014.2;rna-XM_027290790.1;rna-XM_019259517.2;rna-XM_027282102.1;rna-XM_019259522.2;rna-XM_027283780.1;rna-XM_010749447.3;rna-XM_027280244.1
2	GO:0016832	MF	aldehyde-lyase activity	0.0153325	rna-XM_019277878.2;rna-XM_010755153.3
32	GO:0008233	MF	peptidase activity	0.0173653	rna-XM_010757288.3;rna-XM_027274505.1;rna-XM_027287123.1;rna-XM_010746112.3;rna-XM_010730579.3;rna-XM_027283692.1;rna-XM_019277120.2;rna-XM_010732314.3;rna-XM_019266981.2;rna-XM_027286823.1;rna-XM_027275992.1;rna-XM_010741687.3;rna-XM_027273013.1;rna-XM_027282968.1;rna-XM_027277902.1;rna-XM_027281724.1;rna-XM_019258357.2;rna-XM_027280478.1;rna-XM_027281512.1;rna-XM_010741905.3;rna-XM_010740729.3;…
1	GO:0004418	MF	hydroxymethylbilane synthase activity	0.0176135	rna-XM_010740312.3
1	GO:0030731	MF	guanidinoacetate N-methyltransferase activity	0.0176135	rna-XM_010742670.3
2	GO:0016857	MF	racemase and epimerase activity, acting on carbohydrates and derivatives	0.0181865	rna-XM_019259517.2;rna-XM_019259522.2
2	GO:0001228	MF	DNA-binding transcription activator activity, RNA polymerase II-specific	0.0181865	rna-XM_019266619.2;gene-LOC113746670
2	GO:0001216	MF	DNA-binding transcription activator activity	0.0181865	rna-XM_019266619.2;gene-LOC113746670
12	GO:0030695	MF	GTPase regulator activity	0.0184645	rna-XM_019256898.2;rna-XM_010729992.3;rna-XM_019256989.2;rna-XM_027290170.1;rna-XM_010747835.3;rna-XM_010733297.3;rna-XM_010729993.3;rna-XM_027288602.1;rna-XM_027285785.1;rna-XM_019255171.2;rna-XM_010732802.3;rna-XM_019255170.2
5	GO:0001012	MF	RNA polymerase II regulatory region DNA binding	0.0197727	rna-XM_027281319.1;rna-XM_019275956.2;gene-LOC113746670;rna-XM_010755087.3;rna-XM_027277380.1
5	GO:0000977	MF	RNA polymerase II regulatory region sequence-specific DNA binding	0.0197727	rna-XM_027281319.1;rna-XM_019275956.2;gene-LOC113746670;rna-XM_010755087.3;rna-XM_027277380.1
9	GO:0004713	MF	protein tyrosine kinase activity	0.0198931	rna-XM_010738973.3;rna-XM_010739275.3;rna-XM_027273931.1;rna-XM_010739292.3;rna-XM_019267430.2;rna-XM_019253967.2;rna-XM_010734470.3;rna-XM_010730838.3;rna-XM_019277690.2
11	GO:0008509	MF	anion transmembrane transporter activity	0.0209008	rna-NM_001303366.1;rna-XM_019264503.2;rna-XM_019259230.2;rna-XM_027289409.1;rna-XM_010757234.3;rna-XM_019267792.2;rna-XM_027291348.1;rna-XM_027275303.1;rna-XM_027280065.1;rna-XM_019255190.2;rna-XM_010738966.3
2	GO:0005021	MF	vascular endothelial growth factor-activated receptor activity	0.0212452	rna-XM_019267430.2;rna-XM_019277690.2
2	GO:0036374	MF	glutathione hydrolase activity	0.0212452	rna-XM_010746112.3;rna-XM_027273013.1
12	GO:0060589	MF	nucleoside-triphosphatase regulator activity	0.0223827	rna-XM_019256898.2;rna-XM_010729992.3;rna-XM_019256989.2;rna-XM_027290170.1;rna-XM_010747835.3;rna-XM_010733297.3;rna-XM_010729993.3;rna-XM_027288602.1;rna-XM_027285785.1;rna-XM_019255171.2;rna-XM_010732802.3;rna-XM_019255170.2
2	GO:0097153	MF	cysteine-type endopeptidase activity involved in apoptotic process	0.0245007	rna-XM_027282968.1;rna-XM_019265334.2
2	GO:0097200	MF	cysteine-type endopeptidase activity involved in execution phase of apoptosis	0.0245007	rna-XM_027282968.1;rna-XM_019265334.2
2	GO:0004622	MF	lysophospholipase activity	0.0245007	rna-XM_027275486.1;rna-XM_027275487.1
8	GO:0005126	MF	cytokine receptor binding	0.0253671	rna-NM_001303343.1;rna-XM_010735248.3;rna-XM_010737936.3;rna-XM_010749062.3;rna-XM_010737667.3;rna-XM_010733855.3;rna-XM_019258432.2;rna-XM_010739771.3
2	GO:0016854	MF	racemase and epimerase activity	0.027945	rna-XM_019259517.2;rna-XM_019259522.2
3	GO:1901682	MF	sulfur compound transmembrane transporter activity	0.0290745	rna-XM_019255190.2;rna-XM_019267792.2;rna-XM_019259230.2
3	GO:0004180	MF	carboxypeptidase activity	0.0290745	rna-XM_010741905.3;rna-XM_010734391.3;rna-XM_027283692.1
2	GO:0017176	MF	phosphatidylinositol N-acetylglucosaminyltransferase activity	0.0315705	rna-XM_019261186.2;rna-XM_019271065.2
2	GO:0061783	MF	peptidoglycan muralytic activity	0.0315705	rna-XM_027283780.1;rna-XM_010744837.3
2	GO:1904680	MF	peptide transmembrane transporter activity	0.0315705	rna-NM_001303366.1;rna-XM_027291348.1
3	GO:0008408	MF	3'-5' exonuclease activity	0.0331904	rna-XM_019274425.2;rna-XM_010733831.3;rna-XM_019264713.2
116	GO:0043169	MF	cation binding	0.0336582	rna-XM_019262606.2;rna-XM_010757288.3;rna-XM_027289829.1;rna-XM_027288305.1;rna-XM_019267430.2;rna-XM_010757285.3;rna-XM_019272518.2;rna-XM_027289585.1;rna-XM_019259918.2;rna-XM_019259668.2;rna-XM_027285443.1;rna-XM_027278967.1;rna-XM_010740122.3;rna-XM_019274585.2;rna-XM_027279263.1;rna-XM_010732507.3;rna-XM_027277902.1;rna-XM_019277658.2;rna-XM_027290790.1;rna-XM_019274202.2;rna-XM_010745885.3;…
1	GO:0004660	MF	protein farnesyltransferase activity	0.0349172	rna-XR_003463202.1
1	GO:0008115	MF	sarcosine oxidase activity	0.0349172	rna-XM_027280858.1
1	GO:0003896	MF	DNA primase activity	0.0349172	rna-XM_027278530.1
1	GO:0004139	MF	deoxyribose-phosphate aldolase activity	0.0349172	rna-XM_010755153.3
1	GO:0016647	MF	oxidoreductase activity, acting on the CH-NH group of donors, oxygen as acceptor	0.0349172	rna-XM_027280858.1
2	GO:0003724	MF	RNA helicase activity	0.0353698	rna-XM_027282190.1;rna-XM_019273469.2
115	GO:0046872	MF	metal ion binding	0.0380262	rna-XM_019262606.2;rna-XM_010757288.3;rna-XM_027289829.1;rna-XM_027288305.1;rna-XM_019267430.2;rna-XM_010757285.3;rna-XM_027289585.1;rna-XM_019259918.2;rna-XM_019259668.2;rna-XM_027285443.1;rna-XM_027278967.1;rna-XM_010740122.3;rna-XM_019274585.2;rna-XM_027279263.1;rna-XM_010732507.3;rna-XM_027277902.1;rna-XM_019277658.2;rna-XM_027290790.1;rna-XM_019274202.2;rna-XM_010745885.3;rna-XM_027280622.1;…
2	GO:0016405	MF	CoA-ligase activity	0.0393357	rna-XM_019272518.2;rna-XM_010757234.3
9	GO:0016798	MF	hydrolase activity, acting on glycosyl bonds	0.0396728	rna-XM_019272014.2;rna-XM_027290790.1;rna-XM_019259517.2;rna-XM_027282102.1;rna-XM_019259522.2;rna-XM_019275489.2;rna-XM_027283780.1;rna-XM_010749447.3;rna-XM_027280244.1
4	GO:0004867	MF	serine-type endopeptidase inhibitor activity	0.0400253	rna-XM_010745211.3;rna-XM_027283945.1;rna-XM_027272523.1;rna-XM_027279662.1
7	GO:0005088	MF	Ras guanyl-nucleotide exchange factor activity	0.043014	rna-XM_010747815.3;rna-XM_019273722.2;rna-XM_019272167.2;rna-XM_019271143.2;rna-XM_019264785.2;rna-XM_027290057.1;rna-XM_027279007.1
2	GO:0003810	MF	protein-glutamine gamma-glutamyltransferase activity	0.043461	rna-XM_027278847.1;rna-XM_019277658.2
2	GO:0004000	MF	adenosine deaminase activity	0.0477391	rna-XM_010735334.3;rna-XM_010756843.3
2	GO:0004089	MF	carbonate dehydratase activity	0.0477391	rna-XM_027276501.1;rna-XM_027276503.1
9	GO:0005833	CC	hemoglobin complex	1.68837e-07	rna-XM_010730520.3;rna-XM_027285443.1;rna-XM_019252854.2;rna-XM_010730519.3;rna-XM_010730796.3;rna-XM_027288305.1;rna-XM_019252859.2;rna-NM_001303359.1;rna-XM_027285438.1
10	GO:0044445	CC	cytosolic part	0.000165687	rna-XM_027286515.1;rna-XM_010730519.3;rna-XM_027285443.1;rna-XM_019252854.2;rna-XM_010730520.3;rna-XM_010730796.3;rna-XM_027288305.1;rna-XM_019252859.2;rna-NM_001303359.1;rna-XM_027285438.1
5	GO:0000118	CC	histone deacetylase complex	0.00410447	rna-XM_019262606.2;rna-XM_027277486.1;rna-XM_019272559.2;rna-XM_027277482.1;rna-XM_019256481.2
2	GO:0005930	CC	axoneme	0.00613374	rna-XM_010752837.3;rna-XM_027275233.1
4	GO:0000323	CC	lytic vacuole	0.00934388	rna-XM_010746750.3;rna-XM_027281724.1;rna-XM_019266527.2;rna-XM_010734670.3
1	GO:1990909	CC	Wnt signalosome	0.0176135	rna-XM_027278421.1
4	GO:0005773	CC	vacuole	0.0180462	rna-XM_010746750.3;rna-XM_027281724.1;rna-XM_019266527.2;rna-XM_010734670.3
2	GO:0036064	CC	ciliary basal body	0.0181865	rna-XM_010752837.3;rna-XM_027275233.1
11	GO:0005615	CC	extracellular space	0.0197055	rna-XM_027283945.1;rna-XM_010734741.3;rna-NM_001303343.1;rna-XM_010735248.3;rna-XM_010749062.3;rna-XM_019274843.2;rna-XM_010737667.3;rna-XM_010756843.3;rna-XM_010733855.3;rna-XM_019258432.2;rna-XM_010740729.3
14	GO:0005623	CC	cell	0.0223686	rna-XM_027285669.1;rna-XM_027279032.1;rna-XM_027290653.1;rna-XM_027274065.1;rna-XM_027290473.1;rna-XM_010730701.3;rna-XM_010729802.3;rna-XM_019277937.2;rna-XM_027291695.1;rna-XM_010742127.3;rna-XM_010747885.3;rna-XM_027274029.1;rna-XM_010746709.3;rna-XM_027274028.1
3	GO:0000159	CC	protein phosphatase type 2A complex	0.0271247	rna-XM_027278696.1;rna-XM_019259109.2;rna-XM_019279064.2
3	GO:0031225	CC	anchored component of membrane	0.0271247	rna-XM_019262196.2;rna-XM_010734391.3;rna-XM_027278129.1
1	GO:0005965	CC	protein farnesyltransferase complex	0.0349172	rna-XR_003463202.1
14	GO:0044421	CC	extracellular region part	0.0440335	rna-XM_027283945.1;rna-XM_010734741.3;rna-NM_001303343.1;rna-XM_019262196.2;rna-XM_010749062.3;rna-XM_019274843.2;rna-XM_010737667.3;rna-XM_010756843.3;rna-XM_019274368.2;rna-XM_010733855.3;rna-XM_019258432.2;rna-XM_010735248.3;rna-XM_010740584.3;rna-XM_010740729.3
3	GO:0006857	BP	oligopeptide transport	0.000104535	rna-NM_001303366.1;rna-XM_027291348.1;rna-XM_027278213.1
4	GO:0009611	BP	response to wounding	0.000299314	rna-XM_010740584.3;rna-XM_019277930.2;rna-XM_019276648.1;rna-XM_010729344.3
2	GO:0070303	BP	negative regulation of stress-activated protein kinase signaling cascade	0.000309741	rna-XM_027284222.1;rna-XM_027284221.1
2	GO:0071901	BP	negative regulation of protein serine/threonine kinase activity	0.000309741	rna-XM_027284222.1;rna-XM_027284221.1
2	GO:2000016	BP	negative regulation of determination of dorsal identity	0.000309741	rna-XM_027284222.1;rna-XM_027284221.1
2	GO:2000015	BP	regulation of determination of dorsal identity	0.000309741	rna-XM_027284222.1;rna-XM_027284221.1
2	GO:0043508	BP	negative regulation of JUN kinase activity	0.000309741	rna-XM_027284222.1;rna-XM_027284221.1
2	GO:0043506	BP	regulation of JUN kinase activity	0.000309741	rna-XM_027284222.1;rna-XM_027284221.1
2	GO:0046329	BP	negative regulation of JNK cascade	0.000309741	rna-XM_027284222.1;rna-XM_027284221.1
2	GO:0043407	BP	negative regulation of MAP kinase activity	0.000309741	rna-XM_027284222.1;rna-XM_027284221.1
3	GO:0048678	BP	response to axon injury	0.000594993	rna-XM_019277930.2;rna-XM_019276648.1;rna-XM_010729344.3
5	GO:0006606	BP	protein import into nucleus	0.00125967	rna-XM_027274029.1;rna-XM_027285408.1;rna-XR_002042586.2;rna-XM_027274028.1;rna-XM_010735109.3
5	GO:0034504	BP	protein localization to nucleus	0.00125967	rna-XM_027274029.1;rna-XM_027285408.1;rna-XR_002042586.2;rna-XM_027274028.1;rna-XM_010735109.3
5	GO:0051170	BP	import into nucleus	0.00138946	rna-XM_027274029.1;rna-XM_027285408.1;rna-XR_002042586.2;rna-XM_027274028.1;rna-XM_010735109.3
5	GO:0033013	BP	tetrapyrrole metabolic process	0.00138946	rna-XM_010750976.3;rna-XM_010732397.3;rna-XM_010738494.3;rna-XM_019265462.2;rna-XM_010740312.3
4	GO:0033014	BP	tetrapyrrole biosynthetic process	0.00159549	rna-XM_010732397.3;rna-XM_010738494.3;rna-XM_019265462.2;rna-XM_010740312.3
3	GO:0061008	BP	hepaticobiliary system development	0.00171244	rna-XM_027282570.1;rna-XM_027282574.1;rna-XM_027282571.1
2	GO:0006469	BP	negative regulation of protein kinase activity	0.00181522	rna-XM_027284222.1;rna-XM_027284221.1
2	GO:0051348	BP	negative regulation of transferase activity	0.00181522	rna-XM_027284222.1;rna-XM_027284221.1
2	GO:0033673	BP	negative regulation of kinase activity	0.00181522	rna-XM_027284222.1;rna-XM_027284221.1
2	GO:0015670	BP	carbon dioxide transport	0.00299006	rna-XM_027276501.1;rna-XM_027276503.1
4	GO:0097529	BP	myeloid leukocyte migration	0.00323649	rna-XM_027275460.1;rna-NM_001303343.1;rna-XM_019267198.2;rna-XM_010737667.3
22	GO:0006928	BP	movement of cell or subcellular component	0.00431952	rna-XM_019256898.2;rna-NM_001303343.1;rna-XM_010729344.3;rna-XM_019254971.2;rna-XM_027277482.1;rna-XM_019267430.2;rna-XR_003463801.1;rna-XM_027275233.1;rna-XM_010737667.3;rna-XM_027277486.1;rna-XM_019277195.2;rna-XM_019263505.2;rna-XM_027275460.1;rna-XM_027275028.1;rna-XM_010747815.3;rna-XM_010752837.3;rna-XM_019264870.2;rna-XM_019276650.2;rna-XM_019267198.2;rna-XM_027279007.1;rna-XM_010740584.3;…
2	GO:0015669	BP	gas transport	0.00443283	rna-XM_027276501.1;rna-XM_027276503.1
2	GO:0019755	BP	one-carbon compound transport	0.00443283	rna-XM_027276501.1;rna-XM_027276503.1
3	GO:0009262	BP	deoxyribonucleotide metabolic process	0.00495845	rna-XM_010730463.3;rna-XM_027279308.1;rna-XM_010755153.3
7	GO:0042330	BP	taxis	0.00522403	rna-NM_001303343.1;rna-XM_027289233.1;rna-XM_010737667.3;rna-XM_027275460.1;rna-XM_019267198.2;rna-XM_019267430.2;rna-XM_019275379.2
2	GO:0031103	BP	axon regeneration	0.00613374	rna-XM_019277930.2;rna-XM_019276648.1
4	GO:0006778	BP	porphyrin-containing compound metabolic process	0.0062811	rna-XM_010750976.3;rna-XM_010732397.3;rna-XM_010738494.3;rna-XM_019265462.2
17	GO:0040011	BP	locomotion	0.00649514	rna-XM_027275028.1;rna-XM_019256898.2;rna-XM_019259522.2;rna-XM_027289233.1;rna-XM_019259517.2;rna-NM_001303343.1;rna-XM_019263505.2;rna-XM_010737667.3;rna-XM_027277486.1;rna-XM_027275460.1;rna-XM_027277482.1;rna-XM_019267198.2;rna-XM_019267430.2;rna-XR_003463801.1;rna-XM_010740584.3;rna-XM_027278357.1;rna-XM_019275379.2
3	GO:0048264	BP	determination of ventral identity	0.00652599	rna-XM_027284222.1;rna-XM_027284221.1;rna-XM_027277902.1
5	GO:0017038	BP	protein import	0.0065669	rna-XM_027274029.1;rna-XM_027285408.1;rna-XR_002042586.2;rna-XM_027274028.1;rna-XM_010735109.3
4	GO:0008284	BP	positive regulation of cell population proliferation	0.00683058	rna-XM_010739292.3;rna-XM_019277422.2;rna-XM_010730838.3;rna-XM_010739275.3
2	GO:0010717	BP	regulation of epithelial to mesenchymal transition	0.0080833	rna-XM_027277486.1;rna-XM_027277482.1
2	GO:0090299	BP	regulation of neural crest formation	0.0080833	rna-XM_027277486.1;rna-XM_027277482.1
4	GO:1901136	BP	carbohydrate derivative catabolic process	0.00866691	rna-XM_027283780.1;rna-XM_010755153.3;rna-XM_010744837.3;rna-XM_010756843.3
4	GO:0044092	BP	negative regulation of molecular function	0.0100543	rna-XM_027284222.1;rna-XM_027284221.1;rna-XM_019262301.2;rna-XM_019260661.2
2	GO:1901386	BP	negative regulation of voltage-gated calcium channel activity	0.0102722	rna-XM_019262301.2;rna-XM_019260661.2
3	GO:0051924	BP	regulation of calcium ion transport	0.01046	rna-XM_019262301.2;rna-XM_027282602.1;rna-XM_019260661.2
2	GO:0031102	BP	neuron projection regeneration	0.0126916	rna-XM_019277930.2;rna-XM_019276648.1
2	GO:0001966	BP	thigmotaxis	0.0126916	rna-XM_019275379.2;rna-XM_027289233.1
2	GO:0009263	BP	deoxyribonucleotide biosynthetic process	0.0126916	rna-XM_010730463.3;rna-XM_027279308.1
2	GO:0060897	BP	neural plate regionalization	0.0126916	rna-XM_010755978.3;rna-XM_019278703.2
2	GO:0021999	BP	neural plate anterior/posterior regionalization	0.0126916	rna-XM_010755978.3;rna-XM_019278703.2
3	GO:0051051	BP	negative regulation of transport	0.0128426	rna-XM_019262301.2;rna-XM_019277422.2;rna-XM_019260661.2
3	GO:0006779	BP	porphyrin-containing compound biosynthetic process	0.0128426	rna-XM_010732397.3;rna-XM_010738494.3;rna-XM_019265462.2
5	GO:0006022	BP	aminoglycan metabolic process	0.0135871	rna-XM_027283780.1;rna-XM_010749447.3;rna-XM_010744837.3;rna-XM_027279662.1;rna-XM_027285004.1
3	GO:0097190	BP	apoptotic signaling pathway	0.0141403	rna-XM_027279823.1;rna-XM_010739543.3;rna-XM_019275843.2
3	GO:0001503	BP	ossification	0.0141403	rna-XM_019255190.2;rna-XM_027277902.1;rna-XM_010733345.3
2	GO:0060896	BP	neural plate pattern specification	0.0153325	rna-XM_010755978.3;rna-XM_019278703.2
2	GO:0003231	BP	cardiac ventricle development	0.0153325	rna-XR_003463202.1;rna-XM_019275379.2
2	GO:0060319	BP	primitive erythrocyte differentiation	0.0153325	rna-XM_010734644.3;rna-XM_010746323.3
2	GO:1901385	BP	regulation of voltage-gated calcium channel activity	0.0153325	rna-XM_019262301.2;rna-XM_019260661.2
70	GO:0007165	BP	signal transduction	0.016217	rna-XR_003463251.1;rna-XM_019263263.2;rna-XM_027288972.1;rna-XM_010745348.3;rna-XM_019271143.2;rna-XM_019274882.2;rna-XM_010733831.3;rna-XM_010747835.3;rna-XM_027285303.1;rna-XM_019259109.2;rna-XM_019273906.2;rna-XM_019267430.2;rna-XM_010729993.3;rna-XM_027282854.1;rna-XM_027277835.1;rna-XM_027272653.1;rna-XM_027289585.1;rna-XM_027276053.1;rna-XM_010739929.3;rna-XM_019273722.2;rna-XR_003463700.1;…
5	GO:0006575	BP	cellular modified amino acid metabolic process	0.0164877	rna-XM_010742670.3;rna-XM_027280858.1;rna-XM_027272796.1;rna-XM_010746112.3;rna-XM_027273013.1
1	GO:0048250	BP	iron import into the mitochondrion	0.0176135	rna-XM_010750329.3
1	GO:0010823	BP	negative regulation of mitochondrion organization	0.0176135	rna-XM_019277422.2
1	GO:0016577	BP	histone demethylation	0.0176135	rna-XM_027274807.1
1	GO:0072488	BP	ammonium transmembrane transport	0.0176135	rna-XM_010731310.3
1	GO:0070076	BP	histone lysine demethylation	0.0176135	rna-XM_027274807.1
1	GO:0034720	BP	histone H3-K4 demethylation	0.0176135	rna-XM_027274807.1
1	GO:1990791	BP	dorsal root ganglion development	0.0176135	rna-XM_027278421.1
1	GO:0098529	BP	neuromuscular junction development, skeletal muscle fiber	0.0176135	rna-XM_010733267.3
1	GO:0006601	BP	creatine biosynthetic process	0.0176135	rna-XM_010742670.3
1	GO:1901029	BP	negative regulation of mitochondrial outer membrane permeabilization involved in apoptotic signaling pathway	0.0176135	rna-XM_019277422.2
1	GO:0002678	BP	positive regulation of chronic inflammatory response	0.0176135	rna-XM_010740584.3
1	GO:0002676	BP	regulation of chronic inflammatory response	0.0176135	rna-XM_010740584.3
1	GO:0002633	BP	positive regulation of granuloma formation	0.0176135	rna-XM_010740584.3
1	GO:0002631	BP	regulation of granuloma formation	0.0176135	rna-XM_010740584.3
1	GO:0006600	BP	creatine metabolic process	0.0176135	rna-XM_010742670.3
1	GO:0018160	BP	peptidyl-pyrromethane cofactor linkage	0.0176135	rna-XM_010740312.3
1	GO:0015696	BP	ammonium transport	0.0176135	rna-XM_010731310.3
3	GO:0010959	BP	regulation of metal ion transport	0.0184651	rna-XM_019262301.2;rna-XM_027282602.1;rna-XM_019260661.2
3	GO:0033333	BP	fin development	0.0184651	rna-XM_019269152.2;rna-XM_019256067.2;rna-XM_027277902.1
4	GO:0001775	BP	cell activation	0.0191204	rna-NM_001303343.1;rna-XM_019267198.2;rna-XM_010737667.3;rna-XM_010733345.3
140	GO:0050794	BP	regulation of cellular process	0.0195393	rna-XM_010746750.3;rna-XM_010729344.3;rna-XM_027288972.1;rna-XM_027289829.1;rna-XM_010747835.3;rna-XM_019279064.2;rna-XM_019267430.2;rna-XM_019266913.2;rna-XM_027277835.1;rna-XM_027289585.1;rna-XM_027276053.1;rna-XM_027286847.1;rna-XM_027291434.1;rna-XM_027273218.1;rna-XM_019277422.2;rna-XM_019277937.2;rna-XM_027290351.1;rna-XM_019256989.2;rna-XM_010744891.3;rna-XM_027290005.1;rna-XM_019273119.2;…
3	GO:0048736	BP	appendage development	0.0200515	rna-XM_019269152.2;rna-XM_019256067.2;rna-XM_027277902.1
5	GO:0006913	BP	nucleocytoplasmic transport	0.0206561	rna-XM_027274029.1;rna-XM_027285408.1;rna-XR_002042586.2;rna-XM_027274028.1;rna-XM_010735109.3
2	GO:0006971	BP	hypotonic response	0.0212452	rna-XM_027276501.1;rna-XM_027276503.1
2	GO:0032410	BP	negative regulation of transporter activity	0.0212452	rna-XM_019262301.2;rna-XM_019260661.2
2	GO:0032413	BP	negative regulation of ion transmembrane transporter activity	0.0212452	rna-XM_019262301.2;rna-XM_019260661.2
2	GO:1903170	BP	negative regulation of calcium ion transmembrane transport	0.0212452	rna-XM_019262301.2;rna-XM_019260661.2
2	GO:0042539	BP	hypotonic salinity response	0.0212452	rna-XM_027276501.1;rna-XM_027276503.1
2	GO:0034766	BP	negative regulation of ion transmembrane transport	0.0212452	rna-XM_019262301.2;rna-XM_019260661.2
2	GO:0034763	BP	negative regulation of transmembrane transport	0.0212452	rna-XM_019262301.2;rna-XM_019260661.2
2	GO:2001258	BP	negative regulation of cation channel activity	0.0212452	rna-XM_019262301.2;rna-XM_019260661.2
2	GO:0000270	BP	peptidoglycan metabolic process	0.0212452	rna-XM_027283780.1;rna-XM_010744837.3
2	GO:0043271	BP	negative regulation of ion transport	0.0212452	rna-XM_019262301.2;rna-XM_019260661.2
2	GO:1904063	BP	negative regulation of cation transmembrane transport	0.0212452	rna-XM_019262301.2;rna-XM_019260661.2
2	GO:0051926	BP	negative regulation of calcium ion transport	0.0212452	rna-XM_019262301.2;rna-XM_019260661.2
2	GO:1901020	BP	negative regulation of calcium ion transmembrane transporter activity	0.0212452	rna-XM_019262301.2;rna-XM_019260661.2
2	GO:0009253	BP	peptidoglycan catabolic process	0.0212452	rna-XM_027283780.1;rna-XM_010744837.3
2	GO:0009651	BP	response to salt stress	0.0212452	rna-XM_027276501.1;rna-XM_027276503.1
2	GO:0072523	BP	purine-containing compound catabolic process	0.0212452	rna-XM_027278358.1;rna-XM_010756843.3
11	GO:0051704	BP	multi-organism process	0.0225924	rna-XM_027281724.1;rna-XM_010739929.3;rna-XM_027276028.1;rna-XM_010749062.3;rna-XM_019274882.2;rna-XM_027274118.1;rna-XM_010738293.3;rna-XM_010744837.3;rna-XM_010740584.3;rna-XM_010740729.3;rna-XM_019267198.2
5	GO:0051169	BP	nuclear transport	0.0234595	rna-XM_027274029.1;rna-XM_027285408.1;rna-XR_002042586.2;rna-XM_027274028.1;rna-XM_010735109.3
2	GO:0006970	BP	response to osmotic stress	0.0245007	rna-XM_027276501.1;rna-XM_027276503.1
2	GO:0042326	BP	negative regulation of phosphorylation	0.0245007	rna-XM_027284222.1;rna-XM_027284221.1
2	GO:0001933	BP	negative regulation of protein phosphorylation	0.0245007	rna-XM_027284222.1;rna-XM_027284221.1
3	GO:0009225	BP	nucleotide-sugar metabolic process	0.0271247	rna-XM_019259522.2;rna-XM_019259730.2;rna-XM_019259517.2
2	GO:0006047	BP	UDP-N-acetylglucosamine metabolic process	0.027945	rna-XM_019259517.2;rna-XM_019259522.2
2	GO:0048010	BP	vascular endothelial growth factor receptor signaling pathway	0.027945	rna-XM_019267430.2;rna-XM_019277690.2
13	GO:0048870	BP	cell motility	0.0298446	rna-XM_027275028.1;rna-NM_001303343.1;rna-XM_019263505.2;rna-XM_010737667.3;rna-XM_027277486.1;rna-XM_027275460.1;rna-XM_027277482.1;rna-XM_019267198.2;rna-XM_019267430.2;rna-XR_003463801.1;rna-XM_019256898.2;rna-XM_010740584.3;rna-XM_027278357.1
2	GO:0051781	BP	positive regulation of cell division	0.0315705	rna-XM_010735248.3;rna-XM_010733855.3
4	GO:0030203	BP	glycosaminoglycan metabolic process	0.0320404	rna-XM_027283780.1;rna-XM_010744837.3;rna-XM_027279662.1;rna-XM_027285004.1
1	GO:0044566	BP	chondrocyte activation	0.0349172	rna-XM_010733345.3
1	GO:1904262	BP	negative regulation of TORC1 signaling	0.0349172	rna-XM_010746750.3
1	GO:0031581	BP	hemidesmosome assembly	0.0349172	rna-XM_019263505.2
1	GO:0042116	BP	macrophage activation	0.0349172	rna-XM_019267198.2
1	GO:0018343	BP	protein farnesylation	0.0349172	rna-XR_003463202.1
1	GO:0021654	BP	rhombomere boundary formation	0.0349172	rna-XM_010738763.3
1	GO:0008206	BP	bile acid metabolic process	0.0349172	rna-XM_010757234.3
1	GO:0033337	BP	dorsal fin development	0.0349172	rna-XM_019269152.2
1	GO:0033335	BP	anal fin development	0.0349172	rna-XM_019269152.2
1	GO:2001256	BP	regulation of store-operated calcium entry	0.0349172	rna-XM_027282602.1
1	GO:1901028	BP	regulation of mitochondrial outer membrane permeabilization involved in apoptotic signaling pathway	0.0349172	rna-XM_019277422.2
1	GO:0006699	BP	bile acid biosynthetic process	0.0349172	rna-XM_010757234.3
1	GO:0032964	BP	collagen biosynthetic process	0.0349172	rna-XM_027277902.1
1	GO:0006957	BP	complement activation, alternative pathway	0.0349172	rna-XM_010740729.3
1	GO:1901842	BP	negative regulation of high voltage-gated calcium channel activity	0.0349172	rna-XM_019260661.2
4	GO:0071900	BP	regulation of protein serine/threonine kinase activity	0.0351108	rna-XM_027274118.1;rna-XM_027284222.1;rna-XM_027284221.1;rna-XM_010737356.3
3	GO:0006040	BP	amino sugar metabolic process	0.0353558	rna-XM_010749447.3;rna-XM_019259522.2;rna-XM_019259517.2
2	GO:0007528	BP	neuromuscular junction development	0.0353698	rna-XM_010733267.3;rna-XM_027289233.1
345	GO:0008150	BP	biological_process	0.0381634	rna-XM_010757288.3;rna-XM_010742538.3;rna-XM_010747835.3;rna-XM_027277835.1;rna-XM_027289585.1;rna-XM_027276053.1;rna-XM_010736392.3;rna-XM_027286847.1;rna-XM_010750329.3;rna-XM_019277658.2;rna-XM_019256989.2;rna-XM_010744891.3;rna-XM_019273119.2;rna-XM_010739420.3;rna-XM_027283780.1;rna-XM_010737356.3;rna-XM_010733267.3;rna-XM_019256898.2;rna-XM_027275131.1;rna-XM_027282190.1;rna-XM_010749062.3;…
2	GO:0003205	BP	cardiac chamber development	0.0393357	rna-XR_003463202.1;rna-XM_019275379.2
2	GO:0061564	BP	axon development	0.0393357	rna-XM_019277930.2;rna-XM_019276648.1
2	GO:0006751	BP	glutathione catabolic process	0.0393357	rna-XM_010746112.3;rna-XM_027273013.1
2	GO:0050729	BP	positive regulation of inflammatory response	0.0393357	rna-XM_010740584.3;rna-XM_019274882.2
9	GO:0009968	BP	negative regulation of signal transduction	0.0422889	rna-XM_027284116.1;rna-XM_027284221.1;rna-XM_010738973.3;rna-XM_027284222.1;rna-XM_010751802.3;rna-XM_010746750.3;rna-XM_019277422.2;rna-XM_019256067.2;rna-XM_027273080.1
2	GO:0043171	BP	peptide catabolic process	0.043461	rna-XM_010746112.3;rna-XM_027273013.1
2	GO:0045936	BP	negative regulation of phosphate metabolic process	0.043461	rna-XM_027284222.1;rna-XM_027284221.1
2	GO:0010563	BP	negative regulation of phosphorus metabolic process	0.043461	rna-XM_027284222.1;rna-XM_027284221.1
2	GO:0051017	BP	actin filament bundle assembly	0.043461	rna-XM_027275001.1;rna-XM_010729344.3
2	GO:0018149	BP	peptide cross-linking	0.043461	rna-XM_027278847.1;rna-XM_019277658.2
5	GO:0006935	BP	chemotaxis	0.0439149	rna-XM_027275460.1;rna-NM_001303343.1;rna-XM_010737667.3;rna-XM_019267430.2;rna-XM_019267198.2
5	GO:0072594	BP	establishment of protein localization to organelle	0.0439149	rna-XM_027274029.1;rna-XM_027285408.1;rna-XR_002042586.2;rna-XM_027274028.1;rna-XM_010735109.3
3	GO:0010970	BP	transport along microtubule	0.0447233	rna-XM_010752837.3;rna-XM_027275233.1;rna-XM_019277195.2
9	GO:0010648	BP	negative regulation of cell communication	0.0456229	rna-XM_027284116.1;rna-XM_027284221.1;rna-XM_010738973.3;rna-XM_027284222.1;rna-XM_010751802.3;rna-XM_010746750.3;rna-XM_019277422.2;rna-XM_019256067.2;rna-XM_027273080.1
9	GO:0023057	BP	negative regulation of signaling	0.0456229	rna-XM_027284116.1;rna-XM_027284221.1;rna-XM_010738973.3;rna-XM_027284222.1;rna-XM_010751802.3;rna-XM_010746750.3;rna-XM_019277422.2;rna-XM_019256067.2;rna-XM_027273080.1
12	GO:0016477	BP	cell migration	0.045803	rna-XM_027275028.1;rna-NM_001303343.1;rna-XM_010737667.3;rna-XM_027277486.1;rna-XM_027275460.1;rna-XM_027277482.1;rna-XM_019267198.2;rna-XM_019267430.2;rna-XR_003463801.1;rna-XM_019256898.2;rna-XM_010740584.3;rna-XM_027278357.1
2	GO:1901019	BP	regulation of calcium ion transmembrane transporter activity	0.0477391	rna-XM_019262301.2;rna-XM_019260661.2
2	GO:0006026	BP	aminoglycan catabolic process	0.0477391	rna-XM_027283780.1;rna-XM_010744837.3
2	GO:0006027	BP	glycosaminoglycan catabolic process	0.0477391	rna-XM_027283780.1;rna-XM_010744837.3
2	GO:0031400	BP	negative regulation of protein modification process	0.0477391	rna-XM_027284222.1;rna-XM_027284221.1
7	GO:0035023	BP	regulation of Rho protein signal transduction	0.0496501	rna-XM_010747815.3;rna-XM_019273722.2;rna-XM_027279007.1;rna-XM_019271143.2;rna-XM_019264785.2;rna-XM_027290057.1;rna-XM_019256989.2
3	GO:0030705	BP	cytoskeleton-dependent intracellular transport	0.0498227	rna-XM_010752837.3;rna-XM_027275233.1;rna-XM_019277195.2
