# Supplementary material for: Comparative Transcriptomics Reveals the microRNA-Mediated Immune Response of Large Yellow Croaker (Larimichthys crocea) to Pseudomonas plecoglossicida Infection
Source: MDPI journal article supplement (doi:10.3390/fishes8010010), 2022-12-23
Supplement: s1 [file s1 › Table S15.xlsx]

## Sheet: GO富集分析统计表 DEM22
Table S15 GO enrichment of DEmRNA at 24 h
DEmRNA Number	GO ID	Term Type	Description	P value	Transcript ID
2	GO:0034138	BP	toll-like receptor 3 signaling pathway	0.0050443	rna-XM_019274882.2;rna-XM_019274880.2
2	GO:0032642	BP	regulation of chemokine production	0.0050443	rna-XM_019274882.2;rna-XM_019274880.2
2	GO:0032722	BP	positive regulation of chemokine production	0.0050443	rna-XM_019274882.2;rna-XM_019274880.2
2	GO:0006909	BP	phagocytosis	0.0474248	rna-XM_027286309.1;rna-XR_003463322.1
24	GO:0051020	MF	GTPase binding	2.79848e-06	rna-XM_019267187.2;rna-XM_027290431.1;rna-XM_019272197.2;rna-XM_019256749.2;rna-XM_027289856.1;rna-XM_027279681.1;rna-XM_027276355.1;rna-XM_010751974.3;rna-XM_019272190.2;rna-XM_027282192.1;rna-XM_010733514.3;rna-XM_027284101.1;rna-XM_027289642.1;rna-XM_027282855.1;rna-XM_019264785.2;rna-XM_010739991.3;rna-XM_027289312.1;rna-XM_027287195.1;rna-XM_027288953.1;rna-XM_019274595.2;rna-XM_027274956.1;…
18	GO:0005085	MF	guanyl-nucleotide exchange factor activity	7.16369e-06	rna-XM_027284101.1;rna-XM_010751974.3;rna-XM_027289642.1;rna-XM_019267187.2;rna-XM_019272190.2;rna-XM_027290431.1;rna-XM_019272167.2;rna-XM_019264785.2;rna-XM_019266219.2;rna-XM_019272197.2;rna-XM_019256749.2;rna-XM_027289856.1;rna-XM_010739991.3;rna-XM_027289312.1;rna-XM_027282192.1;rna-XM_010733514.3;rna-XM_027287195.1;rna-XM_027279681.1
15	GO:0004252	MF	serine-type endopeptidase activity	1.22844e-05	rna-XM_010734741.3;rna-XM_010734739.3;rna-XM_010741394.3;rna-XM_010741396.3;rna-XM_010732416.3;rna-XM_027280251.1;rna-XM_027275670.1;rna-XM_019253227.2;rna-XM_027286349.1;rna-XM_010732415.3;rna-XM_027274027.1;rna-XM_019279003.2;rna-XM_027281245.1;rna-XM_010735735.3;rna-XM_019267185.2
18	GO:0017016	MF	Ras GTPase binding	1.64734e-05	rna-XM_027284101.1;rna-XM_027276355.1;rna-XM_027288953.1;rna-XM_019272190.2;rna-XM_019267187.2;rna-XM_027274956.1;rna-XM_027282855.1;rna-XM_027290431.1;rna-XM_019272167.2;rna-XM_019264785.2;rna-XM_019266219.2;rna-XM_019272197.2;rna-XM_019256749.2;rna-XM_010739991.3;rna-XM_027289312.1;rna-XM_019274595.2;rna-XM_010747609.3;rna-XM_027279681.1
18	GO:0031267	MF	small GTPase binding	1.84487e-05	rna-XM_027284101.1;rna-XM_027276355.1;rna-XM_027288953.1;rna-XM_019272190.2;rna-XM_019267187.2;rna-XM_027274956.1;rna-XM_027282855.1;rna-XM_027290431.1;rna-XM_019272167.2;rna-XM_019264785.2;rna-XM_019266219.2;rna-XM_019272197.2;rna-XM_019256749.2;rna-XM_010739991.3;rna-XM_027289312.1;rna-XM_019274595.2;rna-XM_010747609.3;rna-XM_027279681.1
14	GO:0017048	MF	Rho GTPase binding	2.32691e-05	rna-XM_027284101.1;rna-XM_019272190.2;rna-XM_019267187.2;rna-XM_019272197.2;rna-XM_027274956.1;rna-XM_027282855.1;rna-XM_027290431.1;rna-XM_019264785.2;rna-XM_019266219.2;rna-XM_019256749.2;rna-XM_010739991.3;rna-XM_027289312.1;rna-XM_010747609.3;rna-XM_027279681.1
29	GO:0019899	MF	enzyme binding	3.59336e-05	rna-XM_019267187.2;rna-XM_027290431.1;rna-XM_019272197.2;rna-XM_019256749.2;rna-XM_027289856.1;rna-XM_027279681.1;rna-XM_027276355.1;rna-XM_027288953.1;rna-XM_019272190.2;rna-XM_027285215.1;rna-XM_027282192.1;rna-XM_010733514.3;rna-XM_027284101.1;rna-XM_027289642.1;rna-XM_027285213.1;rna-XM_027282855.1;rna-XM_019264785.2;rna-XM_027275460.1;rna-XM_010739991.3;rna-XM_027289312.1;rna-XM_027287195.1;…
12	GO:0005088	MF	Ras guanyl-nucleotide exchange factor activity	3.9007e-05	rna-XM_027284101.1;rna-XM_019272190.2;rna-XM_019267187.2;rna-XM_019272197.2;rna-XM_027290431.1;rna-XM_019272167.2;rna-XM_019264785.2;rna-XM_019266219.2;rna-XM_019256749.2;rna-XM_010739991.3;rna-XM_027289312.1;rna-XM_027279681.1
15	GO:0008236	MF	serine-type peptidase activity	7.7423e-05	rna-XM_010734741.3;rna-XM_010734739.3;rna-XM_010741394.3;rna-XM_010741396.3;rna-XM_010732416.3;rna-XM_027280251.1;rna-XM_027275670.1;rna-XM_019253227.2;rna-XM_027286349.1;rna-XM_010732415.3;rna-XM_027274027.1;rna-XM_019279003.2;rna-XM_027281245.1;rna-XM_010735735.3;rna-XM_019267185.2
15	GO:0017171	MF	serine hydrolase activity	7.7423e-05	rna-XM_010734741.3;rna-XM_010734739.3;rna-XM_010741394.3;rna-XM_010741396.3;rna-XM_010732416.3;rna-XM_027280251.1;rna-XM_027275670.1;rna-XM_019253227.2;rna-XM_027286349.1;rna-XM_010732415.3;rna-XM_027274027.1;rna-XM_019279003.2;rna-XM_027281245.1;rna-XM_010735735.3;rna-XM_019267185.2
15	GO:0016825	MF	hydrolase activity, acting on acid phosphorus-nitrogen bonds	7.7423e-05	rna-XM_010734741.3;rna-XM_010734739.3;rna-XM_010741394.3;rna-XM_010741396.3;rna-XM_010732416.3;rna-XM_027280251.1;rna-XM_027275670.1;rna-XM_019253227.2;rna-XM_027286349.1;rna-XM_010732415.3;rna-XM_027274027.1;rna-XM_019279003.2;rna-XM_027281245.1;rna-XM_010735735.3;rna-XM_019267185.2
11	GO:0005089	MF	Rho guanyl-nucleotide exchange factor activity	9.12375e-05	rna-XM_027284101.1;rna-XM_019272190.2;rna-XM_019267187.2;rna-XM_019272197.2;rna-XM_027290431.1;rna-XM_019264785.2;rna-XM_019266219.2;rna-XM_019256749.2;rna-XM_010739991.3;rna-XM_027289312.1;rna-XM_027279681.1
92	GO:0140096	MF	catalytic activity, acting on a protein	0.000257262	rna-XM_010737435.3;rna-XM_027280251.1;rna-XM_019269020.2;rna-XM_027286349.1;rna-XM_019267759.2;rna-XM_019254268.2;rna-XM_010741394.3;rna-XM_019266514.2;rna-XM_010729956.3;rna-XM_010741396.3;rna-XM_010741182.3;rna-XM_027277902.1;rna-XM_019265777.2;rna-XM_010731484.3;rna-XM_019263090.2;rna-XM_010734739.3;rna-XM_010731633.3;rna-XM_019265683.2;rna-XM_010750219.3;rna-XM_010747533.3;rna-XM_010737901.3;…
6	GO:0042054	MF	histone methyltransferase activity	0.00226437	rna-XM_019253917.2;rna-XM_019265777.2;rna-XM_019262518.2;rna-XM_019264251.2;rna-XM_019265774.2;rna-XM_010748103.3
22	GO:0004175	MF	endopeptidase activity	0.00324443	rna-XM_027280251.1;rna-XM_027286349.1;rna-XM_019253227.2;rna-XM_027281245.1;rna-XM_027275670.1;rna-XM_019267185.2;rna-XM_010741394.3;rna-XM_019277120.2;rna-XM_010732415.3;rna-XM_010741396.3;rna-XM_027277902.1;rna-XM_010735735.3;rna-XM_027284023.1;rna-XM_027274027.1;rna-XM_019279003.2;rna-XM_010734741.3;rna-XM_010734739.3;rna-XM_010732416.3;rna-XM_027280670.1;rna-XM_010734672.3;rna-XM_010754823.3;…
30	GO:0070011	MF	peptidase activity, acting on L-amino acid peptides	0.00477926	rna-XM_027280251.1;rna-XM_027286349.1;rna-XM_019262726.2;rna-XM_019253227.2;rna-XM_027281245.1;rna-XM_019262452.2;rna-XM_019267185.2;rna-XM_019274749.2;rna-XM_027275670.1;rna-XM_010741394.3;rna-XM_019277120.2;rna-XM_010732415.3;rna-XM_010741396.3;rna-XM_027277902.1;rna-XM_010735735.3;rna-XM_027284023.1;rna-XM_019261244.2;rna-XM_027281512.1;rna-XM_027274027.1;rna-XM_019279003.2;rna-XM_027285773.1;…
12	GO:0005096	MF	GTPase activator activity	0.00511748	rna-XM_027279217.1;rna-XM_019276639.2;rna-XM_010751974.3;rna-XM_027289642.1;rna-XM_027279219.1;rna-XM_027290431.1;rna-XM_027280198.1;rna-XM_010751871.3;rna-XM_019256989.2;rna-XM_027285785.1;rna-XM_019276635.2;rna-XM_027288953.1
31	GO:0008233	MF	peptidase activity	0.00637855	rna-XM_027277567.1;rna-XM_027280251.1;rna-XM_027286349.1;rna-XM_019262726.2;rna-XM_019253227.2;rna-XM_027281245.1;rna-XM_019262452.2;rna-XM_019267185.2;rna-XM_019274749.2;rna-XM_027275670.1;rna-XM_010741394.3;rna-XM_019277120.2;rna-XM_010732415.3;rna-XM_010741396.3;rna-XM_027277902.1;rna-XM_010735735.3;rna-XM_027284023.1;rna-XM_019261244.2;rna-XM_027281512.1;rna-XM_027274027.1;rna-XM_019279003.2;…
2	GO:0051010	MF	microtubule plus-end binding	0.00665503	rna-XM_019272513.2;rna-XM_027273497.1
5	GO:0018024	MF	histone-lysine N-methyltransferase activity	0.00777209	rna-XM_019253917.2;rna-XM_019264251.2;rna-XM_019265774.2;rna-XM_019265777.2;rna-XM_010748103.3
2	GO:0080025	MF	phosphatidylinositol-3,5-bisphosphate binding	0.0104724	rna-XM_019275086.2;rna-XM_019275087.2
40	GO:0098772	MF	molecular function regulator	0.0118506	rna-XM_010739947.3;rna-XM_010729517.3;rna-XM_027290431.1;rna-XM_019272167.2;rna-XM_019267806.2;rna-XM_027284486.1;rna-XM_019272197.2;rna-XM_019256749.2;rna-XM_027289856.1;rna-XM_019260661.2;rna-XM_027287195.1;rna-XM_027279681.1;rna-XM_019276639.2;rna-XM_010751974.3;rna-XM_019272190.2;rna-XM_010750585.3;rna-XM_010742228.3;rna-XM_027280198.1;rna-XM_019267187.2;rna-XM_027285785.1;rna-XM_027282192.1;…
12	GO:0030695	MF	GTPase regulator activity	0.0122795	rna-XM_027279217.1;rna-XM_019276639.2;rna-XM_010751974.3;rna-XM_027289642.1;rna-XM_027279219.1;rna-XM_027290431.1;rna-XM_027280198.1;rna-XM_010751871.3;rna-XM_019256989.2;rna-XM_027285785.1;rna-XM_019276635.2;rna-XM_027288953.1
12	GO:0060589	MF	nucleoside-triphosphatase regulator activity	0.0137608	rna-XM_027279217.1;rna-XM_019276639.2;rna-XM_010751974.3;rna-XM_027289642.1;rna-XM_027279219.1;rna-XM_027290431.1;rna-XM_027280198.1;rna-XM_010751871.3;rna-XM_019256989.2;rna-XM_027285785.1;rna-XM_019276635.2;rna-XM_027288953.1
6	GO:0008276	MF	protein methyltransferase activity	0.0146713	rna-XM_019253917.2;rna-XM_019265777.2;rna-XM_019262518.2;rna-XM_019264251.2;rna-XM_019265774.2;rna-XM_010748103.3
5	GO:0016278	MF	lysine N-methyltransferase activity	0.0196222	rna-XM_019253917.2;rna-XM_019264251.2;rna-XM_019265774.2;rna-XM_019265777.2;rna-XM_010748103.3
5	GO:0016279	MF	protein-lysine N-methyltransferase activity	0.0196222	rna-XM_019253917.2;rna-XM_019264251.2;rna-XM_019265774.2;rna-XM_019265777.2;rna-XM_010748103.3
2	GO:0008061	MF	chitin binding	0.0231862	rna-XM_010749447.3;rna-XM_010749444.3
6	GO:0008170	MF	N-methyltransferase activity	0.0257833	rna-XM_019253917.2;rna-XM_019265777.2;rna-XM_019262518.2;rna-XM_019264251.2;rna-XM_019265774.2;rna-XM_010748103.3
2	GO:0016597	MF	amino acid binding	0.0262229	rna-XR_003464156.1;rna-XM_019255735.2
2	GO:0001227	MF	DNA-binding transcription repressor activity, RNA polymerase II-specific	0.0262229	rna-XR_003462930.1;rna-XM_019274539.2
2	GO:0001217	MF	DNA-binding transcription repressor activity	0.0262229	rna-XR_003462930.1;rna-XM_019274539.2
308	GO:0005488	MF	binding	0.0295548	rna-XM_019261148.2;rna-XM_019253973.2;rna-XM_027281403.1;rna-XM_010737435.3;rna-XM_019275087.2;rna-XM_027281859.1;rna-XM_019269698.2;rna-XM_019269020.2;rna-XM_019265768.2;rna-XM_010753573.3;rna-XM_019254944.2;rna-XM_019271227.2;rna-XM_027286266.1;rna-XM_027287660.1;rna-XM_027284486.1;rna-XM_027281116.1;rna-XM_027276857.1;rna-XM_027291592.1;rna-XM_027288427.1;rna-XM_010740203.3;rna-XM_019272518.2;…
15	GO:0016741	MF	transferase activity, transferring one-carbon groups	0.0301291	rna-XM_019253917.2;rna-XM_019256064.2;rna-XM_027288492.1;rna-XM_019265777.2;rna-XM_019262518.2;rna-XM_027274004.1;rna-XM_019255735.2;rna-XM_010745586.3;rna-XM_027290117.1;rna-XR_003463322.1;rna-XM_019268298.2;rna-XM_027274983.1;rna-XM_019264251.2;rna-XM_019265774.2;rna-XM_010748103.3
1	GO:0050321	MF	tau-protein kinase activity	0.0316051	rna-XM_019273272.2
1	GO:0008430	MF	selenium binding	0.0316051	rna-XM_027275355.1
1	GO:0035173	MF	histone kinase activity	0.0316051	rna-XM_019273272.2
1	GO:0016743	MF	carboxyl- or carbamoyltransferase activity	0.0316051	rna-XM_019255735.2
1	GO:0044020	MF	histone methyltransferase activity (H4-R3 specific)	0.0316051	rna-XM_019262518.2
5	GO:0003682	MF	chromatin binding	0.0348802	rna-XM_027282051.1;rna-XM_019264251.2;rna-XM_027289328.1;rna-XM_027289326.1;rna-XM_019272084.2
2	GO:0046961	MF	proton-transporting ATPase activity, rotational mechanism	0.0362172	rna-XM_010737059.3;rna-XM_010729267.3
2	GO:0070840	MF	dynein complex binding	0.0362172	rna-XM_027273497.1;rna-XM_027280730.1
3	GO:0008201	MF	heparin binding	0.0368228	rna-XM_019254944.2;rna-XM_010736796.3;rna-XM_019261174.2
12	GO:0008047	MF	enzyme activator activity	0.0406834	rna-XM_027279217.1;rna-XM_019276639.2;rna-XM_010751974.3;rna-XM_027289642.1;rna-XM_027279219.1;rna-XM_027290431.1;rna-XM_027280198.1;rna-XM_010751871.3;rna-XM_019256989.2;rna-XM_027285785.1;rna-XM_019276635.2;rna-XM_027288953.1
14	GO:0008168	MF	methyltransferase activity	0.0409093	rna-XM_019253917.2;rna-XM_019256064.2;rna-XM_027288492.1;rna-XM_019265777.2;rna-XM_019262518.2;rna-XM_027274004.1;rna-XM_010745586.3;rna-XM_027290117.1;rna-XR_003463322.1;rna-XM_019268298.2;rna-XM_027274983.1;rna-XM_019264251.2;rna-XM_019265774.2;rna-XM_010748103.3
2	GO:0005070	MF	SH3/SH2 adaptor activity	0.0435627	rna-XM_010755828.3;rna-XM_019271696.2
2	GO:1902936	MF	phosphatidylinositol bisphosphate binding	0.0435627	rna-XM_019275086.2;rna-XM_019275087.2
34	GO:0004672	MF	protein kinase activity	0.0445503	rna-XM_010746169.3;rna-XM_027288056.1;rna-XM_027281176.1;rna-XM_019269020.2;rna-XM_027291613.1;rna-XM_027288461.1;rna-XM_019268804.2;rna-XM_019273272.2;rna-XM_027278191.1;rna-XM_027274926.1;rna-XM_019266514.2;rna-XM_010739344.3;rna-XM_010740860.3;rna-XM_019262825.2;rna-XM_019254203.2;rna-XM_010731633.3;rna-XM_010741182.3;rna-XM_019277718.2;rna-XM_010738250.3;rna-XM_019259896.2;rna-XM_027282855.1;…
1	GO:0003972	MF	RNA ligase (ATP) activity	0.0470318	rna-XM_027272236.1
1	GO:0008452	MF	RNA ligase activity	0.0470318	rna-XM_027272236.1
1	GO:0004613	MF	phosphoenolpyruvate carboxykinase (GTP) activity	0.0470318	rna-XM_010741613.3
1	GO:0004611	MF	phosphoenolpyruvate carboxykinase activity	0.0470318	rna-XM_010741613.3
1	GO:0004610	MF	phosphoacetylglucosamine mutase activity	0.0470318	rna-XM_027284580.1
1	GO:0030332	MF	cyclin binding	0.0470318	rna-XM_010752451.3
1	GO:0004941	MF	beta2-adrenergic receptor activity	0.0470318	rna-XM_019253098.2
1	GO:0004816	MF	asparagine-tRNA ligase activity	0.0470318	rna-XM_019273010.2
2	GO:0035198	MF	miRNA binding	0.0474248	rna-XM_027286266.1;rna-XM_010734075.3
2	GO:0061980	MF	regulatory RNA binding	0.0474248	rna-XM_027286266.1;rna-XM_010734075.3
2	GO:0030870	CC	Mre11 complex	0.00846665	rna-XM_010736041.3;rna-XM_027273580.1
5	GO:0005815	CC	microtubule organizing center	0.0110996	rna-XM_027286433.1;rna-XM_027273497.1;rna-XM_019272513.2;rna-XM_027286432.1;rna-XM_027280730.1
3	GO:0005885	CC	Arp2/3 protein complex	0.0209184	rna-XM_019263432.2;rna-XM_010744686.3;rna-XM_010750547.3
3	GO:0016514	CC	SWI/SNF complex	0.022449	rna-XM_027277246.1;rna-XM_027277225.1;rna-XM_027287301.1
2	GO:0033180	CC	proton-transporting V-type ATPase, V1 domain	0.0327439	rna-XM_010737059.3;rna-XM_010729267.3
3	GO:0099568	CC	cytoplasmic region	0.0409998	rna-XM_010739807.3;rna-XM_019270331.2;rna-XM_027273497.1
1	GO:0072669	CC	tRNA-splicing ligase complex	0.0470318	rna-XM_027272236.1
2	GO:0016442	CC	RISC complex	0.0474248	rna-XM_027286266.1;rna-XM_010734075.3
2	GO:0031332	CC	RNAi effector complex	0.0474248	rna-XM_027286266.1;rna-XM_010734075.3
12	GO:0035023	BP	regulation of Rho protein signal transduction	5.34753e-05	rna-XM_027284101.1;rna-XM_019272190.2;rna-XM_019267187.2;rna-XM_019272197.2;rna-XM_027290431.1;rna-XM_019264785.2;rna-XM_019266219.2;rna-XM_019256749.2;rna-XM_019256989.2;rna-XM_010739991.3;rna-XM_027289312.1;rna-XM_027279681.1
11	GO:0051493	BP	regulation of cytoskeleton organization	0.00100911	rna-XM_019263432.2;rna-XM_027274956.1;rna-XM_019279354.2;rna-XM_027291613.1;rna-XM_010735624.3;rna-XM_010750547.3;rna-XM_027290431.1;rna-XM_019270331.2;rna-XM_010744686.3;rna-XM_019272513.2;rna-XM_019255831.2
12	GO:0046578	BP	regulation of Ras protein signal transduction	0.0015224	rna-XM_027284101.1;rna-XM_019272190.2;rna-XM_019267187.2;rna-XM_027290431.1;rna-XM_019264785.2;rna-XM_019266219.2;rna-XM_019272197.2;rna-XM_019256749.2;rna-XM_019256989.2;rna-XM_010739991.3;rna-XM_027289312.1;rna-XM_027279681.1
13	GO:0051056	BP	regulation of small GTPase mediated signal transduction	0.00241078	rna-XM_027284101.1;rna-XM_019272190.2;rna-XM_019267187.2;rna-XM_027290431.1;rna-XM_027280198.1;rna-XM_019264785.2;rna-XM_019266219.2;rna-XM_019272197.2;rna-XM_019256749.2;rna-XM_019256989.2;rna-XM_010739991.3;rna-XM_027289312.1;rna-XM_027279681.1
9	GO:0032956	BP	regulation of actin cytoskeleton organization	0.00290143	rna-XM_019263432.2;rna-XM_019279354.2;rna-XM_027291613.1;rna-XM_027274956.1;rna-XM_010750547.3;rna-XM_027290431.1;rna-XM_019270331.2;rna-XM_010744686.3;rna-XM_019255831.2
9	GO:0032970	BP	regulation of actin filament-based process	0.00311745	rna-XM_019263432.2;rna-XM_019279354.2;rna-XM_027291613.1;rna-XM_027274956.1;rna-XM_010750547.3;rna-XM_027290431.1;rna-XM_019270331.2;rna-XM_010744686.3;rna-XM_019255831.2
2	GO:0048897	BP	myelination of lateral line nerve axons	0.0036414	rna-XM_010740860.3;rna-XM_027281360.1
2	GO:0044773	BP	mitotic DNA damage checkpoint	0.0036414	rna-XM_010752451.3;rna-XM_010736041.3
2	GO:0044774	BP	mitotic DNA integrity checkpoint	0.0036414	rna-XM_010752451.3;rna-XM_010736041.3
2	GO:0048932	BP	myelination of posterior lateral line nerve axons	0.0036414	rna-XM_010740860.3;rna-XM_027281360.1
2	GO:0043331	BP	response to dsRNA	0.0050443	rna-XM_019274882.2;rna-XM_019274880.2
2	GO:0043330	BP	response to exogenous dsRNA	0.0050443	rna-XM_019274882.2;rna-XM_019274880.2
2	GO:0051012	BP	microtubule sliding	0.0050443	rna-XM_027280730.1;rna-XM_027273497.1
2	GO:0032836	BP	glomerular basement membrane development	0.0050443	rna-XM_027288941.1;rna-XM_027286373.1
12	GO:0006511	BP	ubiquitin-dependent protein catabolic process	0.00650341	rna-XM_027281512.1;rna-XM_027285213.1;rna-XM_010752451.3;rna-XM_019269698.2;rna-XM_027275460.1;rna-XM_010731484.3;rna-XM_019261244.2;rna-XM_027285215.1;rna-XM_019262452.2;rna-XM_027285211.1;rna-XM_019274749.2;rna-XM_027285773.1
5	GO:0006338	BP	chromatin remodeling	0.00696636	rna-XM_027275822.1;rna-XM_019275471.2;rna-XM_027277246.1;rna-XM_027277225.1;rna-XM_027287301.1
3	GO:0032922	BP	circadian regulation of gene expression	0.00885007	rna-XM_010748452.3;rna-XM_027290091.1;rna-XM_010734615.3
25	GO:1901575	BP	organic substance catabolic process	0.0101565	rna-XM_027282728.1;rna-XM_019253820.2;rna-XM_010736796.3;rna-XM_010732337.3;rna-XM_019262452.2;rna-XM_019274749.2;rna-XM_019269698.2;rna-XM_010733233.3;rna-XM_027281892.1;rna-XM_019261244.2;rna-XM_027285215.1;rna-XM_027284023.1;rna-XM_027285213.1;rna-XM_027285075.1;rna-XM_027279772.1;rna-XM_027275460.1;rna-XM_010731484.3;rna-XM_019263392.2;rna-XM_027285773.1;rna-XM_010742150.3;rna-XM_019275039.2;…
2	GO:0009612	BP	response to mechanical stimulus	0.0104724	rna-XM_010750585.3;rna-NM_001303340.1
3	GO:0097190	BP	apoptotic signaling pathway	0.0107997	rna-XM_019276081.2;rna-XM_019268376.2;rna-XM_019268375.2
27	GO:0035556	BP	intracellular signal transduction	0.0111005	rna-XM_027286604.1;rna-XM_010746169.3;rna-XM_019267187.2;rna-XM_027290431.1;rna-XM_027288200.1;rna-XM_027289856.1;rna-XM_027279681.1;rna-XM_027274926.1;rna-XM_010751974.3;rna-XM_019266514.2;rna-XM_019259896.2;rna-XM_027282192.1;rna-XM_010733514.3;rna-XM_027284101.1;rna-XM_010738250.3;rna-XM_027289642.1;rna-XM_019264785.2;rna-XM_019253098.2;rna-XM_027289312.1;rna-XM_027287195.1;rna-XM_027288953.1;…
65	GO:0007165	BP	signal transduction	0.0115106	rna-XM_027286604.1;rna-XM_019276081.2;rna-XM_027274956.1;rna-XM_019272599.2;rna-XM_027281176.1;rna-XM_019256989.2;rna-XM_027291613.1;rna-XM_027290431.1;rna-XM_027288200.1;rna-XM_019274882.2;rna-XM_027274739.1;rna-XM_027285304.1;rna-XM_019271944.2;rna-XM_027289856.1;rna-XM_019260661.2;rna-XM_010754576.3;rna-XM_027289242.1;rna-XM_027279681.1;rna-XM_010738283.3;rna-XM_027274926.1;rna-XM_019276639.2;…
15	GO:0040011	BP	locomotion	0.0132422	rna-XM_010739807.3;rna-XM_019263505.2;rna-XM_010740176.3;rna-XM_027289642.1;rna-XM_019271686.2;rna-XM_027272068.1;rna-XM_010740860.3;rna-XM_027286309.1;rna-XM_027275460.1;rna-XM_010730222.3;rna-XM_019268298.2;rna-XM_019272599.2;rna-XM_010736951.3;rna-XM_019268817.2;rna-XM_010747609.3
5	GO:0051495	BP	positive regulation of cytoskeleton organization	0.0139976	rna-XM_019263432.2;rna-XM_019255831.2;rna-XM_010744686.3;rna-XM_010750547.3;rna-XM_027274956.1
12	GO:0019941	BP	modification-dependent protein catabolic process	0.0145675	rna-XM_027281512.1;rna-XM_027285213.1;rna-XM_010752451.3;rna-XM_019269698.2;rna-XM_027275460.1;rna-XM_010731484.3;rna-XM_019261244.2;rna-XM_027285215.1;rna-XM_019262452.2;rna-XM_027285211.1;rna-XM_019274749.2;rna-XM_027285773.1
15	GO:0009057	BP	macromolecule catabolic process	0.0149032	rna-XM_027284023.1;rna-XM_027285213.1;rna-XM_010752451.3;rna-XM_010732337.3;rna-XM_019269698.2;rna-XM_027275460.1;rna-XM_010731484.3;rna-XM_027281512.1;rna-XM_027285773.1;rna-XM_019261244.2;rna-XM_027285215.1;rna-XM_019262452.2;rna-XM_027285211.1;rna-XM_019274749.2;rna-XM_027281892.1
12	GO:0043632	BP	modification-dependent macromolecule catabolic process	0.0149224	rna-XM_027281512.1;rna-XM_027285213.1;rna-XM_010752451.3;rna-XM_019269698.2;rna-XM_027275460.1;rna-XM_010731484.3;rna-XM_019261244.2;rna-XM_027285215.1;rna-XM_019262452.2;rna-XM_027285211.1;rna-XM_019274749.2;rna-XM_027285773.1
2	GO:0055003	BP	cardiac myofibril assembly	0.0150397	rna-XM_010749063.3;rna-XM_010740860.3
2	GO:0006030	BP	chitin metabolic process	0.0150397	rna-XM_010749447.3;rna-XM_010749444.3
1	GO:0010719	BP	negative regulation of epithelial to mesenchymal transition	0.0159292	rna-XM_010751871.3
1	GO:0090301	BP	negative regulation of neural crest formation	0.0159292	rna-XM_010751871.3
128	GO:0050794	BP	regulation of cellular process	0.0165601	rna-XM_027286604.1;rna-XM_027288366.1;rna-XM_027286266.1;rna-XM_027284486.1;rna-XM_019274880.2;rna-XM_027288953.1;rna-XM_019266514.2;rna-XM_019272190.2;rna-XM_010736796.3;rna-XM_027280198.1;rna-XM_010739528.3;rna-XM_027280457.1;rna-XM_010733514.3;rna-XM_010755089.3;rna-XM_027273643.1;rna-XM_027291285.1;rna-XM_019256989.2;rna-XM_019274356.2;rna-XM_027277246.1;rna-XM_027281360.1;rna-XM_027284133.1;…
3	GO:0008360	BP	regulation of cell shape	0.0166827	rna-XM_010739807.3;rna-XM_019270331.2;rna-XM_010747609.3
19	GO:0006928	BP	movement of cell or subcellular component	0.0168936	rna-XM_010739807.3;rna-XM_027286309.1;rna-XM_010735624.3;rna-XM_027289642.1;rna-XM_019272190.2;rna-XM_019263505.2;rna-XM_027272068.1;rna-XM_010740860.3;rna-XM_027273497.1;rna-XM_019254971.2;rna-XM_027275460.1;rna-XM_019272197.2;rna-XM_027280730.1;rna-XM_019272599.2;rna-XM_019268298.2;rna-XM_010736951.3;rna-XM_019268817.2;rna-XM_010747609.3;rna-XR_003463171.1
5	GO:0051301	BP	cell division	0.0173649	rna-XM_027289784.1;rna-XM_027273497.1;rna-XM_019273272.2;rna-XM_010737973.3;rna-XM_027280730.1
4	GO:0030155	BP	regulation of cell adhesion	0.0181143	rna-XM_010751838.3;rna-XM_010736951.3;rna-XM_027291613.1;rna-XM_027288366.1
12	GO:0051603	BP	proteolysis involved in cellular protein catabolic process	0.0189799	rna-XM_027281512.1;rna-XM_027285213.1;rna-XM_010752451.3;rna-XM_019269698.2;rna-XM_027275460.1;rna-XM_010731484.3;rna-XM_019261244.2;rna-XM_027285215.1;rna-XM_019262452.2;rna-XM_027285211.1;rna-XM_019274749.2;rna-XM_027285773.1
2	GO:0001935	BP	endothelial cell proliferation	0.0203061	rna-XM_010739807.3;rna-XM_010736951.3
2	GO:0039022	BP	pronephric duct development	0.0203061	rna-XM_027288941.1;rna-XM_027286373.1
2	GO:0072176	BP	nephric duct development	0.0203061	rna-XM_027288941.1;rna-XM_027286373.1
3	GO:0070507	BP	regulation of microtubule cytoskeleton organization	0.0209184	rna-XM_010735624.3;rna-XM_019272513.2;rna-XM_027274956.1
14	GO:0044265	BP	cellular macromolecule catabolic process	0.0212845	rna-XM_027285213.1;rna-XM_010752451.3;rna-XM_010732337.3;rna-XM_019269698.2;rna-XM_027275460.1;rna-XM_010731484.3;rna-XM_027281512.1;rna-XM_027285773.1;rna-XM_019261244.2;rna-XM_027285215.1;rna-XM_019262452.2;rna-XM_027285211.1;rna-XM_019274749.2;rna-XM_027281892.1
5	GO:0010564	BP	regulation of cell cycle process	0.0229193	rna-XM_010752451.3;rna-XM_010736041.3;rna-XM_010735624.3;rna-XM_027290431.1;rna-XM_027274956.1
11	GO:0033043	BP	regulation of organelle organization	0.0245459	rna-XM_019263432.2;rna-XM_027274956.1;rna-XM_019279354.2;rna-XM_027291613.1;rna-XM_010735624.3;rna-XM_010750547.3;rna-XM_027290431.1;rna-XM_019270331.2;rna-XM_010744686.3;rna-XM_019272513.2;rna-XM_019255831.2
2	GO:0046503	BP	glycerolipid catabolic process	0.0262229	rna-XM_010736796.3;rna-XM_010733233.3
2	GO:0002756	BP	MyD88-independent toll-like receptor signaling pathway	0.0262229	rna-XM_019274882.2;rna-XM_019274880.2
3	GO:0007623	BP	circadian rhythm	0.027397	rna-XM_010748452.3;rna-XM_027290091.1;rna-XM_010734615.3
3	GO:0032886	BP	regulation of microtubule-based process	0.027397	rna-XM_010735624.3;rna-XM_019272513.2;rna-XM_027274956.1
3	GO:0006040	BP	amino sugar metabolic process	0.027397	rna-XM_027284580.1;rna-XM_010749447.3;rna-XM_010749444.3
3	GO:0034314	BP	Arp2/3 complex-mediated actin nucleation	0.027397	rna-XM_019263432.2;rna-XM_010744686.3;rna-XM_010750547.3
3	GO:0042552	BP	myelination	0.0291648	rna-XM_010740860.3;rna-XM_027281360.1;rna-XM_027289642.1
3	GO:0007272	BP	ensheathment of neurons	0.0291648	rna-XM_010740860.3;rna-XM_027281360.1;rna-XM_027289642.1
3	GO:0008366	BP	axon ensheathment	0.0291648	rna-XM_010740860.3;rna-XM_027281360.1;rna-XM_027289642.1
2	GO:0072015	BP	glomerular visceral epithelial cell development	0.0294107	rna-XM_027288941.1;rna-XM_027286373.1
2	GO:0051294	BP	establishment of spindle orientation	0.0294107	rna-XM_027273497.1;rna-XM_027280730.1
2	GO:0072310	BP	glomerular epithelial cell development	0.0294107	rna-XM_027288941.1;rna-XM_027286373.1
2	GO:0000132	BP	establishment of mitotic spindle orientation	0.0294107	rna-XM_027273497.1;rna-XM_027280730.1
2	GO:0035118	BP	embryonic pectoral fin morphogenesis	0.0294107	rna-XM_010747436.3;rna-XM_019272599.2
25	GO:0009056	BP	catabolic process	0.0298005	rna-XM_027282728.1;rna-XM_019253820.2;rna-XM_010736796.3;rna-XM_010732337.3;rna-XM_019262452.2;rna-XM_019274749.2;rna-XM_019269698.2;rna-XM_010733233.3;rna-XM_027281892.1;rna-XM_019261244.2;rna-XM_027285215.1;rna-XM_027284023.1;rna-XM_027285213.1;rna-XM_027285075.1;rna-XM_027279772.1;rna-XM_027275460.1;rna-XM_010731484.3;rna-XM_019263392.2;rna-XM_027285773.1;rna-XM_010742150.3;rna-XM_019275039.2;…
3	GO:0033334	BP	fin morphogenesis	0.0309915	rna-XM_010747436.3;rna-XM_010741394.3;rna-XM_019272599.2
1	GO:0006349	BP	regulation of gene expression by genetic imprinting	0.0316051	rna-XM_019262518.2
1	GO:0120078	BP	cell adhesion involved in sprouting angiogenesis	0.0316051	rna-XM_010751838.3
1	GO:0044566	BP	chondrocyte activation	0.0316051	rna-XM_010733346.3
1	GO:1902354	BP	blood vessel endothelial cell delamination involved in blood vessel lumen ensheathment	0.0316051	rna-XM_010751838.3
1	GO:1902355	BP	endothelial tube lumen extension involved in blood vessel lumen ensheathment	0.0316051	rna-XM_010751838.3
1	GO:0090224	BP	regulation of spindle organization	0.0316051	rna-XM_010735624.3
1	GO:0031581	BP	hemidesmosome assembly	0.0316051	rna-XM_019263505.2
1	GO:0044818	BP	mitotic G2/M transition checkpoint	0.0316051	rna-XM_010736041.3
1	GO:0032285	BP	non-myelinated axon ensheathment	0.0316051	rna-XM_010740860.3
1	GO:0097498	BP	endothelial tube lumen extension	0.0316051	rna-XM_010751838.3
1	GO:0097497	BP	blood vessel endothelial cell delamination	0.0316051	rna-XM_010751838.3
1	GO:0007095	BP	mitotic G2 DNA damage checkpoint	0.0316051	rna-XM_010736041.3
1	GO:0071514	BP	genetic imprinting	0.0316051	rna-XM_019262518.2
1	GO:0060236	BP	regulation of mitotic spindle organization	0.0316051	rna-XM_010735624.3
1	GO:1902908	BP	regulation of melanosome transport	0.0316051	rna-XM_027283507.1
1	GO:0031572	BP	G2 DNA damage checkpoint	0.0316051	rna-XM_010736041.3
1	GO:0090235	BP	regulation of metaphase plate congression	0.0316051	rna-XM_010735624.3
1	GO:0071294	BP	cellular response to zinc ion	0.0316051	rna-XM_019267224.2
1	GO:0032964	BP	collagen biosynthetic process	0.0316051	rna-XM_027277902.1
1	GO:1901842	BP	negative regulation of high voltage-gated calcium channel activity	0.0316051	rna-XM_019260661.2
8	GO:0090066	BP	regulation of anatomical structure size	0.0318931	rna-XM_019263432.2;rna-XM_010741702.3;rna-XM_019258551.2;rna-XM_019279354.2;rna-XM_010750547.3;rna-XM_010744686.3;rna-XM_019253098.2;rna-XM_019255831.2
2	GO:0001837	BP	epithelial to mesenchymal transition	0.0327439	rna-XM_019257329.2;rna-XM_010740860.3
2	GO:0050729	BP	positive regulation of inflammatory response	0.0327439	rna-XM_019274882.2;rna-XM_019274880.2
3	GO:0014070	BP	response to organic cyclic compound	0.0328769	rna-XM_019268209.2;rna-XM_019274882.2;rna-XM_019274880.2
6	GO:0032535	BP	regulation of cellular component size	0.0344035	rna-XM_019263432.2;rna-XM_010741702.3;rna-XM_019279354.2;rna-XM_010750547.3;rna-XM_010744686.3;rna-XM_019255831.2
3	GO:0043062	BP	extracellular structure organization	0.0348208	rna-XM_027288941.1;rna-XM_027286373.1;rna-XM_019272599.2
3	GO:0030198	BP	extracellular matrix organization	0.0348208	rna-XM_027288941.1;rna-XM_027286373.1;rna-XM_019272599.2
2	GO:0072073	BP	kidney epithelium development	0.0362172	rna-XM_027288941.1;rna-XM_027286373.1
2	GO:1901991	BP	negative regulation of mitotic cell cycle phase transition	0.0362172	rna-XM_010752451.3;rna-XM_010736041.3
2	GO:0060536	BP	cartilage morphogenesis	0.0362172	rna-XM_010733346.3;rna-XM_010741394.3
2	GO:1901988	BP	negative regulation of cell cycle phase transition	0.0362172	rna-XM_010752451.3;rna-XM_010736041.3
3	GO:0035107	BP	appendage morphogenesis	0.0368228	rna-XM_010747436.3;rna-XM_010741394.3;rna-XM_019272599.2
5	GO:0010638	BP	positive regulation of organelle organization	0.0371864	rna-XM_019263432.2;rna-XM_019255831.2;rna-XM_010744686.3;rna-XM_010750547.3;rna-XM_027274956.1
12	GO:0048870	BP	cell motility	0.0374165	rna-XM_010739807.3;rna-XM_019263505.2;rna-XM_027289642.1;rna-XM_027272068.1;rna-XM_010740860.3;rna-XM_027286309.1;rna-XM_027275460.1;rna-XM_019272599.2;rna-XM_019268298.2;rna-XM_010736951.3;rna-XM_019268817.2;rna-XM_010747609.3
4	GO:0006022	BP	aminoglycan metabolic process	0.0390534	rna-XM_010749447.3;rna-XM_010749444.3;rna-XM_019272599.2;rna-XM_010729517.3
2	GO:0000768	BP	syncytium formation by plasma membrane fusion	0.0398252	rna-XM_027286373.1;rna-XM_027289642.1
2	GO:0007520	BP	myoblast fusion	0.0398252	rna-XM_027286373.1;rna-XM_027289642.1
2	GO:0140253	BP	cell-cell fusion	0.0398252	rna-XM_027286373.1;rna-XM_027289642.1
2	GO:0006949	BP	syncytium formation	0.0398252	rna-XM_027286373.1;rna-XM_027289642.1
136	GO:0050789	BP	regulation of biological process	0.0400855	rna-XM_027286604.1;rna-XM_027288366.1;rna-XM_027286266.1;rna-XM_027284486.1;rna-XM_019274880.2;rna-XM_027288953.1;rna-XM_019266514.2;rna-XM_019272190.2;rna-XM_010736796.3;rna-XM_027280198.1;rna-XM_010739528.3;rna-XM_027280457.1;rna-XM_010734615.3;rna-XM_010733514.3;rna-XM_010755089.3;rna-XM_027273643.1;rna-XM_027291285.1;rna-XM_019256989.2;rna-XM_019274356.2;rna-XM_027277246.1;rna-XM_027281360.1;…
3	GO:0034249	BP	negative regulation of cellular amide metabolic process	0.0431741	rna-XM_010735234.3;rna-XM_027286266.1;rna-XM_010734075.3
3	GO:0017148	BP	negative regulation of translation	0.0431741	rna-XM_010735234.3;rna-XM_027286266.1;rna-XM_010734075.3
3	GO:0007417	BP	central nervous system development	0.0431741	rna-XM_019272197.2;rna-XM_019261174.2;rna-XM_019272190.2
2	GO:0008277	BP	regulation of G protein-coupled receptor signaling pathway	0.0435627	rna-XM_010751871.3;rna-XM_027291285.1
2	GO:0034627	BP	'de novo' NAD biosynthetic process	0.0435627	rna-XM_027282728.1;rna-XM_019263392.2
2	GO:0034354	BP	'de novo' NAD biosynthetic process from tryptophan	0.0435627	rna-XM_027282728.1;rna-XM_019263392.2
7	GO:0006351	BP	transcription, DNA-templated	0.0457968	rna-XM_019276081.2;rna-XM_019268376.2;rna-XM_010732337.3;rna-XM_019268375.2;rna-XR_003464049.1;rna-XM_010732782.3;rna-XM_027272802.1
7	GO:0097659	BP	nucleic acid-templated transcription	0.0457968	rna-XM_019276081.2;rna-XM_019268376.2;rna-XM_010732337.3;rna-XM_019268375.2;rna-XR_003464049.1;rna-XM_010732782.3;rna-XM_027272802.1
10	GO:0048731	BP	system development	0.0461351	rna-XM_019272190.2;rna-XM_019261174.2;rna-XM_027280730.1;rna-XM_027282573.1;rna-XM_019272197.2;rna-XM_027273497.1;rna-XM_027273512.1;rna-XM_027273517.1;rna-XM_010751838.3;rna-XM_027277902.1
6	GO:1903047	BP	mitotic cell cycle process	0.0469589	rna-XM_027276740.1;rna-XM_010752451.3;rna-XM_010736041.3;rna-XM_027273497.1;rna-XM_027280730.1;rna-XM_010750615.3
1	GO:0036072	BP	direct ossification	0.0470318	rna-XM_010733346.3
1	GO:0070445	BP	regulation of oligodendrocyte progenitor proliferation	0.0470318	rna-XM_027281360.1
1	GO:0010825	BP	positive regulation of centrosome duplication	0.0470318	rna-XM_027274956.1
1	GO:0044819	BP	mitotic G1/S transition checkpoint	0.0470318	rna-XM_010752451.3
1	GO:0014044	BP	Schwann cell development	0.0470318	rna-XM_010740860.3
1	GO:0044783	BP	G1 DNA damage checkpoint	0.0470318	rna-XM_010752451.3
1	GO:0006421	BP	asparaginyl-tRNA aminoacylation	0.0470318	rna-XM_019273010.2
1	GO:0048914	BP	myelination of anterior lateral line nerve axons	0.0470318	rna-XM_010740860.3
1	GO:0046607	BP	positive regulation of centrosome cycle	0.0470318	rna-XM_027274956.1
1	GO:0031571	BP	mitotic G1 DNA damage checkpoint	0.0470318	rna-XM_010752451.3
1	GO:0001957	BP	intramembranous ossification	0.0470318	rna-XM_010733346.3
1	GO:0032954	BP	regulation of cytokinetic process	0.0470318	rna-XM_027290431.1
1	GO:2000431	BP	regulation of cytokinesis, actomyosin contractile ring assembly	0.0470318	rna-XM_027290431.1
4	GO:0030838	BP	positive regulation of actin filament polymerization	0.0470473	rna-XM_019263432.2;rna-XM_019255831.2;rna-XM_010744686.3;rna-XM_010750547.3
4	GO:1902905	BP	positive regulation of supramolecular fiber organization	0.0487469	rna-XM_019263432.2;rna-XM_019255831.2;rna-XM_010744686.3;rna-XM_010750547.3
