# Supplementary material for: Comparative Transcriptomics Reveals the microRNA-Mediated Immune Response of Large Yellow Croaker (Larimichthys crocea) to Pseudomonas plecoglossicida Infection
Source: MDPI journal article supplement (doi:10.3390/fishes8010010), 2022-12-23
Supplement: s1 [file s1 › Table S16.xlsx]

## Sheet: Table S16
Table S16 KEGG pathway annotaiton of DEmRNA at 12 h and 24 h
First Category	Second Category	pathway ID	Description	DEmRNA number at 12 h	DEmRNA number at 24 h
Organismal Systems	Aging	map04213	Longevity regulating pathway - multiple species	4	6
Organismal Systems	Aging	map04212	Longevity regulating pathway - worm	4	3
Organismal Systems	Aging	map04211	Longevity regulating pathway	7	7
Metabolism	Amino acid metabolism	map00310	Lysine degradation	9	11
Metabolism	Amino acid metabolism	map00260	Glycine, serine and threonine metabolism	3	1
Metabolism	Amino acid metabolism	map00300	Lysine biosynthesis	1	0
Metabolism	Amino acid metabolism	map00380	Tryptophan metabolism	2	3
Metabolism	Amino acid metabolism	map00280	Valine, leucine and isoleucine degradation	2	1
Metabolism	Amino acid metabolism	map00270	Cysteine and methionine metabolism	2	4
Metabolism	Amino acid metabolism	map00220	Arginine biosynthesis	1	1
Metabolism	Amino acid metabolism	map00340	Histidine metabolism	2	1
Metabolism	Amino acid metabolism	map00330	Arginine and proline metabolism	5	2
Human Diseases	Cancers: Overview	map05202	Transcriptional misregulation in cancer	24	8
Human Diseases	Cancers: Overview	map05230	Central carbon metabolism in cancer	10	6
Human Diseases	Cancers: Overview	map05231	Choline metabolism in cancer	12	12
Human Diseases	Cancers: Overview	map05205	Proteoglycans in cancer	22	17
Human Diseases	Cancers: Overview	map05200	Pathways in cancer	66	33
Human Diseases	Cancers: Overview	map05206	MicroRNAs in cancer	18	21
Human Diseases	Cancers: Overview	map05204	Chemical carcinogenesis	4	0
Human Diseases	Cancers: Overview	map05203	Viral carcinogenesis	16	16
Human Diseases	Cancers: Specific types	map05223	Non-small cell lung cancer	5	7
Human Diseases	Cancers: Specific types	map05222	Small cell lung cancer	14	9
Human Diseases	Cancers: Specific types	map05224	Breast cancer	9	9
Human Diseases	Cancers: Specific types	map05226	Gastric cancer	16	10
Human Diseases	Cancers: Specific types	map05221	Acute myeloid leukemia	9	5
Human Diseases	Cancers: Specific types	map05220	Chronic myeloid leukemia	10	9
Human Diseases	Cancers: Specific types	map05225	Hepatocellular carcinoma	14	11
Human Diseases	Cancers: Specific types	map05214	Glioma	11	7
Human Diseases	Cancers: Specific types	map05215	Prostate cancer	14	9
Human Diseases	Cancers: Specific types	map05216	Thyroid cancer	6	1
Human Diseases	Cancers: Specific types	map05217	Basal cell carcinoma	3	0
Human Diseases	Cancers: Specific types	map05213	Endometrial cancer	6	5
Human Diseases	Cancers: Specific types	map05218	Melanoma	8	6
Human Diseases	Cancers: Specific types	map05219	Bladder cancer	4	3
Human Diseases	Cancers: Specific types	map05210	Colorectal cancer	13	7
Human Diseases	Cancers: Specific types	map05211	Renal cell carcinoma	9	11
Human Diseases	Cancers: Specific types	map05212	Pancreatic cancer	10	9
Metabolism	Carbohydrate metabolism	map00650	Butanoate metabolism	0	1
Metabolism	Carbohydrate metabolism	map00040	Pentose and glucuronate interconversions	2	0
Metabolism	Carbohydrate metabolism	map00562	Inositol phosphate metabolism	5	6
Metabolism	Carbohydrate metabolism	map00051	Fructose and mannose metabolism	5	2
Metabolism	Carbohydrate metabolism	map00052	Galactose metabolism	5	3
Metabolism	Carbohydrate metabolism	map00053	Ascorbate and aldarate metabolism	1	1
Metabolism	Carbohydrate metabolism	map00020	Citrate cycle (TCA cycle)	2	2
Metabolism	Carbohydrate metabolism	map00520	Amino sugar and nucleotide sugar metabolism	4	7
Metabolism	Carbohydrate metabolism	map00500	Starch and sucrose metabolism	2	0
Metabolism	Carbohydrate metabolism	map00030	Pentose phosphate pathway	4	2
Metabolism	Carbohydrate metabolism	map00620	Pyruvate metabolism	2	3
Metabolism	Carbohydrate metabolism	map00630	Glyoxylate and dicarboxylate metabolism	1	2
Metabolism	Carbohydrate metabolism	map00010	Glycolysis / Gluconeogenesis	6	6
Metabolism	Carbohydrate metabolism	map00640	Propanoate metabolism	1	2
Human Diseases	Cardiovascular diseases	map05416	Viral myocarditis	6	4
Human Diseases	Cardiovascular diseases	map05418	Fluid shear stress and atherosclerosis	17	16
Human Diseases	Cardiovascular diseases	map05412	Arrhythmogenic right ventricular cardiomyopathy (ARVC)	9	7
Human Diseases	Cardiovascular diseases	map05414	Dilated cardiomyopathy (DCM)	14	10
Human Diseases	Cardiovascular diseases	map05410	Hypertrophic cardiomyopathy (HCM)	13	11
Cellular Processes	Cell growth and death	map04110	Cell cycle	7	9
Cellular Processes	Cell growth and death	map04114	Oocyte meiosis	11	9
Cellular Processes	Cell growth and death	map04115	p53 signaling pathway	5	3
Cellular Processes	Cell growth and death	map04218	Cellular senescence	15	13
Cellular Processes	Cell growth and death	map04210	Apoptosis	15	11
Cellular Processes	Cell growth and death	map04217	Necroptosis	13	8
Cellular Processes	Cell growth and death	map04215	Apoptosis - multiple species	2	2
Cellular Processes	Cell growth and death	map04214	Apoptosis - fly	4	6
Cellular Processes	Cell motility	map04810	Regulation of actin cytoskeleton	21	24
Cellular Processes	Cellular community - eukaryotes	map04530	Tight junction	16	25
Cellular Processes	Cellular community - eukaryotes	map04550	Signaling pathways regulating pluripotency of stem cells	11	9
Cellular Processes	Cellular community - eukaryotes	map04520	Adherens junction	11	16
Cellular Processes	Cellular community - eukaryotes	map04540	Gap junction	9	2
Cellular Processes	Cellular community - eukaryotes	map04510	Focal adhesion	26	22
Organismal Systems	Circulatory system	map04260	Cardiac muscle contraction	5	2
Organismal Systems	Circulatory system	map04261	Adrenergic signaling in cardiomyocytes	17	9
Organismal Systems	Circulatory system	map04270	Vascular smooth muscle contraction	13	6
Organismal Systems	Development	map04320	Dorso-ventral axis formation	4	1
Organismal Systems	Development	map04380	Osteoclast differentiation	6	11
Organismal Systems	Development	map04360	Axon guidance	19	26
Organismal Systems	Digestive system	map04978	Mineral absorption	1	2
Organismal Systems	Digestive system	map04979	Cholesterol metabolism	8	3
Organismal Systems	Digestive system	map04970	Salivary secretion	5	2
Organismal Systems	Digestive system	map04977	Vitamin digestion and absorption	5	1
Organismal Systems	Digestive system	map04975	Fat digestion and absorption	4	2
Organismal Systems	Digestive system	map04973	Carbohydrate digestion and absorption	3	5
Organismal Systems	Digestive system	map04972	Pancreatic secretion	5	10
Organismal Systems	Digestive system	map04974	Protein digestion and absorption	4	14
Organismal Systems	Digestive system	map04971	Gastric acid secretion	10	2
Organismal Systems	Digestive system	map04976	Bile secretion	5	1
Human Diseases	Drug resistance: Antineoplastic	map01523	Antifolate resistance	4	1
Human Diseases	Drug resistance: Antineoplastic	map01521	EGFR tyrosine kinase inhibitor resistance	11	9
Human Diseases	Drug resistance: Antineoplastic	map01522	Endocrine resistance	8	8
Human Diseases	Drug resistance: Antineoplastic	map01524	Platinum drug resistance	5	5
Human Diseases	Endocrine and metabolic diseases	map04940	Type I diabetes mellitus	4	3
Human Diseases	Endocrine and metabolic diseases	map04932	Non-alcoholic fatty liver disease (NAFLD)	12	8
Human Diseases	Endocrine and metabolic diseases	map04933	AGE-RAGE signaling pathway in diabetic complications	12	10
Human Diseases	Endocrine and metabolic diseases	map04934	Cushing syndrome	15	4
Human Diseases	Endocrine and metabolic diseases	map04930	Type II diabetes mellitus	5	2
Human Diseases	Endocrine and metabolic diseases	map04931	Insulin resistance	7	14
Organismal Systems	Endocrine system	map04911	Insulin secretion	10	5
Organismal Systems	Endocrine system	map04921	Oxytocin signaling pathway	19	9
Organismal Systems	Endocrine system	map04925	Aldosterone synthesis and secretion	6	4
Organismal Systems	Endocrine system	map04924	Renin secretion	5	4
Organismal Systems	Endocrine system	map04927	Cortisol synthesis and secretion	3	2
Organismal Systems	Endocrine system	map04926	Relaxin signaling pathway	11	6
Organismal Systems	Endocrine system	map04928	Parathyroid hormone synthesis, secretion and action	13	7
Organismal Systems	Endocrine system	map04913	Ovarian steroidogenesis	3	1
Organismal Systems	Endocrine system	map04923	Regulation of lipolysis in adipocytes	7	5
Organismal Systems	Endocrine system	map04910	Insulin signaling pathway	12	12
Organismal Systems	Endocrine system	map04916	Melanogenesis	11	3
Organismal Systems	Endocrine system	map04920	Adipocytokine signaling pathway	8	6
Organismal Systems	Endocrine system	map03320	PPAR signaling pathway	9	3
Organismal Systems	Endocrine system	map04922	Glucagon signaling pathway	10	11
Organismal Systems	Endocrine system	map04918	Thyroid hormone synthesis	5	2
Organismal Systems	Endocrine system	map04919	Thyroid hormone signaling pathway	10	11
Organismal Systems	Endocrine system	map04912	GnRH signaling pathway	7	5
Organismal Systems	Endocrine system	map04914	Progesterone-mediated oocyte maturation	8	10
Organismal Systems	Endocrine system	map04915	Estrogen signaling pathway	12	12
Organismal Systems	Endocrine system	map04917	Prolactin signaling pathway	5	7
Metabolism	Energy metabolism	map00910	Nitrogen metabolism	2	0
Metabolism	Energy metabolism	map00190	Oxidative phosphorylation	0	4
Organismal Systems	Environmental adaptation	map04713	Circadian entrainment	10	3
Organismal Systems	Environmental adaptation	map04710	Circadian rhythm	2	5
Organismal Systems	Environmental adaptation	map04714	Thermogenesis	14	9
Organismal Systems	Environmental adaptation	map04711	Circadian rhythm - fly	1	1
Organismal Systems	Excretory system	map04964	Proximal tubule bicarbonate reclamation	3	2
Organismal Systems	Excretory system	map04961	Endocrine and other factor-regulated calcium reabsorption	2	2
Organismal Systems	Excretory system	map04966	Collecting duct acid secretion	2	1
Organismal Systems	Excretory system	map04960	Aldosterone-regulated sodium reabsorption	3	5
Organismal Systems	Excretory system	map04962	Vasopressin-regulated water reabsorption	0	4
Genetic Information Processing	Folding, sorting and degradation	map04130	SNARE interactions in vesicular transport	1	1
Genetic Information Processing	Folding, sorting and degradation	map03060	Protein export	0	1
Genetic Information Processing	Folding, sorting and degradation	map03018	RNA degradation	5	3
Genetic Information Processing	Folding, sorting and degradation	map04141	Protein processing in endoplasmic reticulum	10	8
Genetic Information Processing	Folding, sorting and degradation	map04120	Ubiquitin mediated proteolysis	11	13
Genetic Information Processing	Folding, sorting and degradation	map04122	Sulfur relay system	1	0
Metabolism	Glycan biosynthesis and metabolism	map00604	Glycosphingolipid biosynthesis - ganglio series	1	1
Metabolism	Glycan biosynthesis and metabolism	map00563	Glycosylphosphatidylinositol (GPI)-anchor biosynthesis	2	0
Metabolism	Glycan biosynthesis and metabolism	map00601	Glycosphingolipid biosynthesis - lacto and neolacto series	3	0
Metabolism	Glycan biosynthesis and metabolism	map00603	Glycosphingolipid biosynthesis - globo and isoglobo series	3	1
Metabolism	Glycan biosynthesis and metabolism	map00533	Glycosaminoglycan biosynthesis - keratan sulfate	2	0
Metabolism	Glycan biosynthesis and metabolism	map00510	N-Glycan biosynthesis	2	1
Metabolism	Glycan biosynthesis and metabolism	map00512	Mucin type O-glycan biosynthesis	0	1
Metabolism	Glycan biosynthesis and metabolism	map00514	Other types of O-glycan biosynthesis	2	2
Metabolism	Glycan biosynthesis and metabolism	map00515	Mannose type O-glycan biosynthesis	1	0
Metabolism	Glycan biosynthesis and metabolism	map00534	Glycosaminoglycan biosynthesis - heparan sulfate / heparin	3	2
Metabolism	Glycan biosynthesis and metabolism	map00532	Glycosaminoglycan biosynthesis - chondroitin sulfate / dermatan sulfate	1	0
Human Diseases	Immune diseases	map05332	Graft-versus-host disease	4	3
Human Diseases	Immune diseases	map05330	Allograft rejection	4	3
Human Diseases	Immune diseases	map05310	Asthma	1	1
Human Diseases	Immune diseases	map05340	Primary immunodeficiency	4	1
Human Diseases	Immune diseases	map05320	Autoimmune thyroid disease	4	3
Human Diseases	Immune diseases	map05321	Inflammatory bowel disease (IBD)	7	3
Human Diseases	Immune diseases	map05322	Systemic lupus erythematosus	3	3
Human Diseases	Immune diseases	map05323	Rheumatoid arthritis	5	5
Organismal Systems	Immune system	map04623	Cytosolic DNA-sensing pathway	1	2
Organismal Systems	Immune system	map04620	Toll-like receptor signaling pathway	9	8
Organismal Systems	Immune system	map04621	NOD-like receptor signaling pathway	13	8
Organismal Systems	Immune system	map04640	Hematopoietic cell lineage	8	8
Organismal Systems	Immune system	map04666	Fc gamma R-mediated phagocytosis	4	9
Organismal Systems	Immune system	map04650	Natural killer cell mediated cytotoxicity	7	5
Organismal Systems	Immune system	map04657	IL-17 signaling pathway	8	2
Organismal Systems	Immune system	map04658	Th1 and Th2 cell differentiation	7	3
Organismal Systems	Immune system	map04662	B cell receptor signaling pathway	3	7
Organismal Systems	Immune system	map04664	Fc epsilon RI signaling pathway	4	6
Organismal Systems	Immune system	map04660	T cell receptor signaling pathway	4	9
Organismal Systems	Immune system	map04062	Chemokine signaling pathway	14	14
Organismal Systems	Immune system	map04659	Th17 cell differentiation	9	3
Organismal Systems	Immune system	map04624	Toll and Imd signaling pathway	0	3
Organismal Systems	Immune system	map04625	C-type lectin receptor signaling pathway	4	8
Organismal Systems	Immune system	map04670	Leukocyte transendothelial migration	14	12
Organismal Systems	Immune system	map04672	Intestinal immune network for IgA production	3	8
Organismal Systems	Immune system	map04622	RIG-I-like receptor signaling pathway	3	6
Organismal Systems	Immune system	map04611	Platelet activation	12	9
Organismal Systems	Immune system	map04610	Complement and coagulation cascades	9	5
Organismal Systems	Immune system	map04612	Antigen processing and presentation	7	4
Human Diseases	Infectious diseases: Bacterial	map05110	Vibrio cholerae infection	1	2
Human Diseases	Infectious diseases: Bacterial	map05120	Epithelial cell signaling in Helicobacter pylori infection	6	6
Human Diseases	Infectious diseases: Bacterial	map05134	Legionellosis	4	2
Human Diseases	Infectious diseases: Bacterial	map05131	Shigellosis	5	8
Human Diseases	Infectious diseases: Bacterial	map05130	Pathogenic Escherichia coli infection	4	4
Human Diseases	Infectious diseases: Bacterial	map05133	Pertussis	5	1
Human Diseases	Infectious diseases: Bacterial	map05152	Tuberculosis	12	12
Human Diseases	Infectious diseases: Bacterial	map05150	Staphylococcus aureus infection	4	3
Human Diseases	Infectious diseases: Bacterial	map05132	Salmonella infection	7	8
Human Diseases	Infectious diseases: Bacterial	map05100	Bacterial invasion of epithelial cells	5	10
Human Diseases	Infectious diseases: Parasitic	map05140	Leishmaniasis	5	5
Human Diseases	Infectious diseases: Parasitic	map05142	Chagas disease (American trypanosomiasis)	12	5
Human Diseases	Infectious diseases: Parasitic	map05143	African trypanosomiasis	2	0
Human Diseases	Infectious diseases: Parasitic	map05144	Malaria	6	4
Human Diseases	Infectious diseases: Parasitic	map05145	Toxoplasmosis	15	11
Human Diseases	Infectious diseases: Parasitic	map05146	Amoebiasis	14	6
Human Diseases	Infectious diseases: Viral	map05166	Human T-cell leukemia virus 1 infection	18	20
Human Diseases	Infectious diseases: Viral	map05167	Kaposi sarcoma-associated herpesvirus infection	15	11
Human Diseases	Infectious diseases: Viral	map05164	Influenza A	13	22
Human Diseases	Infectious diseases: Viral	map05165	Human papillomavirus infection	41	30
Human Diseases	Infectious diseases: Viral	map05162	Measles	9	6
Human Diseases	Infectious diseases: Viral	map05163	Human cytomegalovirus infection	20	14
Human Diseases	Infectious diseases: Viral	map05160	Hepatitis C	12	7
Human Diseases	Infectious diseases: Viral	map05161	Hepatitis B	14	17
Human Diseases	Infectious diseases: Viral	map05168	Herpes simplex infection	13	12
Human Diseases	Infectious diseases: Viral	map05169	Epstein-Barr virus infection	13	11
Metabolism	Lipid metabolism	map00061	Fatty acid biosynthesis	3	1
Metabolism	Lipid metabolism	map00140	Steroid hormone biosynthesis	3	0
Metabolism	Lipid metabolism	map00071	Fatty acid degradation	3	3
Metabolism	Lipid metabolism	map00564	Glycerophospholipid metabolism	9	6
Metabolism	Lipid metabolism	map00062	Fatty acid elongation	1	0
Metabolism	Lipid metabolism	map00565	Ether lipid metabolism	2	4
Metabolism	Lipid metabolism	map00561	Glycerolipid metabolism	5	4
Metabolism	Lipid metabolism	map00600	Sphingolipid metabolism	5	0
Metabolism	Lipid metabolism	map00591	Linoleic acid metabolism	2	2
Metabolism	Lipid metabolism	map00100	Steroid biosynthesis	0	1
Metabolism	Lipid metabolism	map00590	Arachidonic acid metabolism	5	2
Metabolism	Lipid metabolism	map00592	alpha-Linolenic acid metabolism	2	2
Metabolism	Lipid metabolism	map01040	Biosynthesis of unsaturated fatty acids	1	0
Environmental Information Processing	Membrane transport	map02010	ABC transporters	5	5
Metabolism	Metabolism of cofactors and vitamins	map00790	Folate biosynthesis	2	1
Metabolism	Metabolism of cofactors and vitamins	map00860	Porphyrin and chlorophyll metabolism	7	0
Metabolism	Metabolism of cofactors and vitamins	map00780	Biotin metabolism	1	0
Metabolism	Metabolism of cofactors and vitamins	map00760	Nicotinate and nicotinamide metabolism	5	1
Metabolism	Metabolism of cofactors and vitamins	map00740	Riboflavin metabolism	2	0
Metabolism	Metabolism of cofactors and vitamins	map00830	Retinol metabolism	2	1
Metabolism	Metabolism of cofactors and vitamins	map00730	Thiamine metabolism	1	1
Metabolism	Metabolism of other amino acids	map00410	beta-Alanine metabolism	3	1
Metabolism	Metabolism of other amino acids	map00440	Phosphonate and phosphinate metabolism	1	0
Metabolism	Metabolism of other amino acids	map00450	Selenocompound metabolism	0	1
Metabolism	Metabolism of other amino acids	map00430	Taurine and hypotaurine metabolism	2	0
Metabolism	Metabolism of other amino acids	map00480	Glutathione metabolism	5	0
Metabolism	Metabolism of terpenoids and polyketides	map00981	Insect hormone biosynthesis	0	1
Metabolism	Metabolism of terpenoids and polyketides	map00900	Terpenoid backbone biosynthesis	3	1
Organismal Systems	Nervous system	map04728	Dopaminergic synapse	12	9
Organismal Systems	Nervous system	map04726	Serotonergic synapse	8	3
Organismal Systems	Nervous system	map04724	Glutamatergic synapse	9	6
Organismal Systems	Nervous system	map04730	Long-term depression	7	1
Organismal Systems	Nervous system	map04727	GABAergic synapse	6	1
Organismal Systems	Nervous system	map04725	Cholinergic synapse	12	8
Organismal Systems	Nervous system	map04721	Synaptic vesicle cycle	1	2
Organismal Systems	Nervous system	map04723	Retrograde endocannabinoid signaling	8	3
Organismal Systems	Nervous system	map04720	Long-term potentiation	8	3
Organismal Systems	Nervous system	map04722	Neurotrophin signaling pathway	12	8
Human Diseases	Neurodegenerative diseases	map05012	Parkinson disease	3	4
Human Diseases	Neurodegenerative diseases	map05016	Huntington disease	3	8
Human Diseases	Neurodegenerative diseases	map05014	Amyotrophic lateral sclerosis (ALS)	1	2
Human Diseases	Neurodegenerative diseases	map05010	Alzheimer disease	7	9
Human Diseases	Neurodegenerative diseases	map05020	Prion diseases	0	1
Metabolism	Nucleotide metabolism	map00230	Purine metabolism	10	7
Metabolism	Nucleotide metabolism	map00240	Pyrimidine metabolism	5	4
Genetic Information Processing	Replication and repair	map03410	Base excision repair	3	3
Genetic Information Processing	Replication and repair	map03430	Mismatch repair	2	1
Genetic Information Processing	Replication and repair	map03420	Nucleotide excision repair	3	2
Genetic Information Processing	Replication and repair	map03030	DNA replication	3	2
Genetic Information Processing	Replication and repair	map03450	Non-homologous end-joining	1	1
Genetic Information Processing	Replication and repair	map03440	Homologous recombination	4	3
Genetic Information Processing	Replication and repair	map03460	Fanconi anemia pathway	3	1
Organismal Systems	Sensory system	map04742	Taste transduction	5	0
Organismal Systems	Sensory system	map04745	Phototransduction - fly	6	2
Organismal Systems	Sensory system	map04740	Olfactory transduction	8	5
Organismal Systems	Sensory system	map04750	Inflammatory mediator regulation of TRP channels	11	9
Environmental Information Processing	Signal transduction	map04330	Notch signaling pathway	6	4
Environmental Information Processing	Signal transduction	map04024	cAMP signaling pathway	16	15
Environmental Information Processing	Signal transduction	map04630	Jak-STAT signaling pathway	16	7
Environmental Information Processing	Signal transduction	map04370	VEGF signaling pathway	5	7
Environmental Information Processing	Signal transduction	map04390	Hippo signaling pathway	10	8
Environmental Information Processing	Signal transduction	map04015	Rap1 signaling pathway	28	23
Environmental Information Processing	Signal transduction	map04014	Ras signaling pathway	25	19
Environmental Information Processing	Signal transduction	map04010	MAPK signaling pathway	38	30
Environmental Information Processing	Signal transduction	map04013	MAPK signaling pathway - fly	4	7
Environmental Information Processing	Signal transduction	map04012	ErbB signaling pathway	10	9
Environmental Information Processing	Signal transduction	map04072	Phospholipase D signaling pathway	18	9
Environmental Information Processing	Signal transduction	map04310	Wnt signaling pathway	14	13
Environmental Information Processing	Signal transduction	map04070	Phosphatidylinositol signaling system	7	12
Environmental Information Processing	Signal transduction	map04668	TNF signaling pathway	7	14
Environmental Information Processing	Signal transduction	map04066	HIF-1 signaling pathway	10	10
Environmental Information Processing	Signal transduction	map04068	FoxO signaling pathway	15	10
Environmental Information Processing	Signal transduction	map04150	mTOR signaling pathway	11	12
Environmental Information Processing	Signal transduction	map04151	PI3K-Akt signaling pathway	47	25
Environmental Information Processing	Signal transduction	map04152	AMPK signaling pathway	15	14
Environmental Information Processing	Signal transduction	map04071	Sphingolipid signaling pathway	17	7
Environmental Information Processing	Signal transduction	map04391	Hippo signaling pathway - fly	8	7
Environmental Information Processing	Signal transduction	map04392	Hippo signaling pathway - multiple species	1	1
Environmental Information Processing	Signal transduction	map04064	NF-kappa B signaling pathway	7	6
Environmental Information Processing	Signal transduction	map04341	Hedgehog signaling pathway - fly	1	2
Environmental Information Processing	Signal transduction	map04340	Hedgehog signaling pathway	3	3
Environmental Information Processing	Signal transduction	map04350	TGF-beta signaling pathway	8	5
Environmental Information Processing	Signal transduction	map04020	Calcium signaling pathway	19	10
Environmental Information Processing	Signal transduction	map04022	cGMP-PKG signaling pathway	14	11
Environmental Information Processing	Signaling molecules and interaction	map04080	Neuroactive ligand-receptor interaction	11	14
Environmental Information Processing	Signaling molecules and interaction	map04060	Cytokine-cytokine receptor interaction	13	9
Environmental Information Processing	Signaling molecules and interaction	map04514	Cell adhesion molecules (CAMs)	10	21
Environmental Information Processing	Signaling molecules and interaction	map04512	ECM-receptor interaction	10	10
Human Diseases	Substance dependence	map05034	Alcoholism	12	5
Human Diseases	Substance dependence	map05030	Cocaine addiction	1	3
Human Diseases	Substance dependence	map05031	Amphetamine addiction	4	4
Human Diseases	Substance dependence	map05032	Morphine addiction	8	4
Human Diseases	Substance dependence	map05033	Nicotine addiction	2	0
Genetic Information Processing	Transcription	map03040	Spliceosome	7	5
Genetic Information Processing	Transcription	map03020	RNA polymerase	0	1
Genetic Information Processing	Transcription	map03022	Basal transcription factors	1	2
Genetic Information Processing	Translation	map00970	Aminoacyl-tRNA biosynthesis	1	1
Genetic Information Processing	Translation	map03010	Ribosome	2	2
Genetic Information Processing	Translation	map03013	RNA transport	4	6
Genetic Information Processing	Translation	map03015	mRNA surveillance pathway	7	4
Genetic Information Processing	Translation	map03008	Ribosome biogenesis in eukaryotes	4	5
Cellular Processes	Transport and catabolism	map04146	Peroxisome	6	1
Cellular Processes	Transport and catabolism	map04145	Phagosome	9	9
Cellular Processes	Transport and catabolism	map04144	Endocytosis	20	16
Cellular Processes	Transport and catabolism	map04140	Autophagy - animal	12	11
Cellular Processes	Transport and catabolism	map04142	Lysosome	8	9
Metabolism	Xenobiotics biodegradation and metabolism	map00980	Metabolism of xenobiotics by cytochrome P450	3	0
Metabolism	Xenobiotics biodegradation and metabolism	map00983	Drug metabolism - other enzymes	3	1
Metabolism	Xenobiotics biodegradation and metabolism	map00982	Drug metabolism - cytochrome P450	1	0
