# Supplementary material for: Comparative Transcriptomics Reveals the microRNA-Mediated Immune Response of Large Yellow Croaker (Larimichthys crocea) to Pseudomonas plecoglossicida Infection
Source: MDPI journal article supplement (doi:10.3390/fishes8010010), 2022-12-23
Supplement: s1 [file s1 › Table S17.xlsx]

## Sheet: Sheet1
Table S17 Pairs of DEmiRNA-DEmRNA at 12 h
miRNA name	Target transcript ID	Target gene ID	Target gene name	Target gene description	start_miranda	end_miranda	score_miranda	energy_miranda	paired_miranda	start_rnahybrid	end_rnahybrid	energy_rnahybrid	pvalue_rnahybrid	paired_rnahybrid
dre-let-7i	XM_010737356.3	gene-ccnl1	CCNL1	cyclin L1, transcript variant X2	244	265	160	-28.41	miRNA: 3' uuGUCGUGUUUGAUGAUGGAGu 5' **||||||**|||*||:||||: target: 5' ttCAGCACTCACTTCTGCCTCg 3'	245	266	-30.5	0.008041	target: 5' ACUCACUUCUGCCUCGA 3' ||**|||*||:||||:* miRNA: 3' UGUUUGAUGAUGGAGU- 5'
lcr-miR-N82	XM_027281103.1	gene-LOC104932418	USP6NL	USP6 N-terminal-like protein, transcript variant X3	1181	1200	161	-23.79	miRNA: 3' ucUGGGUCUCCGUCUGGGUCu 5' :*||*|*|||*:||||||||* target: 5' gaACAC-GAGTTAGACCCAGt 3'	618	638	-30.6	0.009058	target: 5' CAGUAGAACACGAGUUAGACCCAGU 3' ||*********|||*:||||||||* miRNA: 3' GU---------CUCCGUCUGGGUCU 5'
lcr-miR-N82	XM_027285137.1	gene-LOC104929637	PTPRS	receptor-type tyrosine-protein phosphatase S-like, transcript variant X4	2089	2110	162	-31.51	miRNA: 3' ucUG-GGUCUCCGUCUGGGUCu 5' :*||*::|||||||||||:||* target: 5' gtACATTAGAGGCAGACCTAGt 3'	2082	2102	-35.1	0.002375	target: 5' UACAUUAGAGGCAGACCUAGU 3' ****::|||||||||||:||* miRNA: 3' ----GGUCUCCGUCUGGGUCU 5'
lcr-miR-N82	XM_027291409.1	gene-erbb4	ERBB4	erb-b2 receptor tyrosine kinase 4, transcript variant X1	3437	3458	162	-26.84	miRNA: 3' ucUGGGUCU-CCGUCUGGGUCu 5' **|*::|||**||||||||||: target: 5' taAATTAGACTGCAGACCCAGg 3'	3429	3449	-33.4	0.009827	target: 5' AAAUUAGACUGCAGACCCAGGC 3' *****|||**||||||||||:* miRNA: 3' -----UCUC-CGUCUGGGUCU- 5'
lcr-miR-N83	XM_027281103.1	gene-LOC104932418	USP6NL	USP6 N-terminal-like protein, transcript variant X3	1181	1200	161	-23.79	miRNA: 3' ucUGGGUCUCCGUCUGGGUCu 5' :*||*|*|||*:||||||||* target: 5' gaACAC-GAGTTAGACCCAGt 3'	618	638	-30.6	0.009058	target: 5' CAGUAGAACACGAGUUAGACCCAGU 3' ||*********|||*:||||||||* miRNA: 3' GU---------CUCCGUCUGGGUCU 5'
lcr-miR-N83	XM_027285137.1	gene-LOC104929637	PTPRS	receptor-type tyrosine-protein phosphatase S-like, transcript variant X4	2089	2110	162	-31.51	miRNA: 3' ucUG-GGUCUCCGUCUGGGUCu 5' :*||*::|||||||||||:||* target: 5' gtACATTAGAGGCAGACCTAGt 3'	2082	2102	-35.1	0.002375	target: 5' UACAUUAGAGGCAGACCUAGU 3' ****::|||||||||||:||* miRNA: 3' ----GGUCUCCGUCUGGGUCU 5'
lcr-miR-N83	XM_027291409.1	gene-erbb4	ERBB4	erb-b2 receptor tyrosine kinase 4, transcript variant X1	3437	3458	162	-26.84	miRNA: 3' ucUGGGUCU-CCGUCUGGGUCu 5' **|*::|||**||||||||||: target: 5' taAATTAGACTGCAGACCCAGg 3'	3429	3449	-33.4	0.009827	target: 5' AAAUUAGACUGCAGACCCAGGC 3' *****|||**||||||||||:* miRNA: 3' -----UCUC-CGUCUGGGUCU- 5'
lcr-miR-N148	XM_027274690.1	gene-ralgapa2	RALGAPA2	Ral GTPase activating protein catalytic alpha subunit 2, transcript variant X4	552	572	172	-29.12	miRNA: 3' uccuACUUGGGCGACGUCUCCu 5' *|**||||*|:||||||||||: target: 5' tgttTGAA-CTGCTGCAGAGGg 3'	555	576	-33.4	0.004348	target: 5' AA-CUGCUGCAGAGGGG 3' ||*|:||||||||||:* miRNA: 3' UUGGGCGACGUCUCCU- 5'
lcr-miR-N148	XM_019273906.2	gene-LOC104919939	RAPGEF3	rap guanine nucleotide exchange factor 3, transcript variant X1	1746	1770	162	-29.27	miRNA: 3' ucCUACUUGGGC-GA--CGUCUCCu 5' :||||||||**|*||**|||||||: target: 5' ggGATGAACAGGACTAAGCAGAGGg 3'	1744	1765	-33.4	0.007126	target: 5' GAACAGGACUAAGCAGAGGGA 3' ||||**|*||**|||||||:* miRNA: 3' CUUGGGC-GA--CGUCUCCU- 5'
lcr-miR-N148	XM_019268772.2	gene-gorab	GORAB	golgin, RAB6 interacting	958	977	165	-29.63	miRNA: 3' ucCUACUUGGGCGACGUCUCCu 5' *||||||**:|*|||||||||* target: 5' tgGATGA--TCTCTGCAGAGGt 3'	958	979	-31.7	0.004597	target: 5' AGCAGACUGUACCUGACACGACUGUCGGGCUGCAGAGGGA 3' *******||*|||:**************||||||||||:* miRNA: 3' -------ACUUGGG--------------CGACGUCUCCU- 5'
lcr-miR-N148	XM_019264785.2	gene-dnmbp	DNMBP	dynamin binding protein, transcript variant X1	595	616	162	-20.55	miRNA: 3' uccuACUUGGGCGACGUCUCCu 5' :***||||*:**|||||||||* target: 5' gtttTGAAGTGTCTGCAGAGGc 3'	570	591	-29.3	0.008713	target: 5' GAUUAUCUACUGGUUGCUAGUUUUGAAGUGUCUGCAGAGGC 3' ||*************:|:**********:|*|||||||||* miRNA: 3' CU-------------UGG----------GC-GACGUCUCCU 5'
lcr-miR-N148	XM_019253881.2	gene-acsf3	ACSF3	acyl-CoA synthetase family member 3, transcript variant X2	149	171	167	-28.9	miRNA: 3' uccuacUUG-GGCGACGUCUCCu 5' |**|**|||*|:||||||||||| target: 5' atcacaAACACTGCTGCAGAGGa 3'	133	154	-38.2	0.00015	target: 5' AACACCUCCCAUCACAAACACUGCUGCAGAGGAA 3' |**|||:***************|||||||||||* miRNA: 3' U--UGGG---------------CGACGUCUCCU- 5'
lcr-miR-N149	XM_027274690.1	gene-ralgapa2	RALGAPA2	Ral GTPase activating protein catalytic alpha subunit 2, transcript variant X4	552	572	172	-29.12	miRNA: 3' uccuACUUGGGCGACGUCUCCu 5' *|**||||*|:||||||||||: target: 5' tgttTGAA-CTGCTGCAGAGGg 3'	555	576	-33.4	0.004348	target: 5' AA-CUGCUGCAGAGGGG 3' ||*|:||||||||||:* miRNA: 3' UUGGGCGACGUCUCCU- 5'
lcr-miR-N149	XM_019273906.2	gene-LOC104919939	RAPGEF3	rap guanine nucleotide exchange factor 3, transcript variant X1	1746	1770	162	-29.27	miRNA: 3' ucCUACUUGGGC-GA--CGUCUCCu 5' :||||||||**|*||**|||||||: target: 5' ggGATGAACAGGACTAAGCAGAGGg 3'	1744	1765	-33.4	0.007126	target: 5' GAACAGGACUAAGCAGAGGGA 3' ||||**|*||**|||||||:* miRNA: 3' CUUGGGC-GA--CGUCUCCU- 5'
lcr-miR-N149	XM_019268772.2	gene-gorab	GORAB	golgin, RAB6 interacting	958	977	165	-29.63	miRNA: 3' ucCUACUUGGGCGACGUCUCCu 5' *||||||**:|*|||||||||* target: 5' tgGATGA--TCTCTGCAGAGGt 3'	958	979	-31.7	0.004597	target: 5' AGCAGACUGUACCUGACACGACUGUCGGGCUGCAGAGGGA 3' *******||*|||:**************||||||||||:* miRNA: 3' -------ACUUGGG--------------CGACGUCUCCU- 5'
lcr-miR-N149	XM_019264785.2	gene-dnmbp	DNMBP	dynamin binding protein, transcript variant X1	595	616	162	-20.55	miRNA: 3' uccuACUUGGGCGACGUCUCCu 5' :***||||*:**|||||||||* target: 5' gtttTGAAGTGTCTGCAGAGGc 3'	570	591	-29.3	0.008713	target: 5' GAUUAUCUACUGGUUGCUAGUUUUGAAGUGUCUGCAGAGGC 3' ||*************:|:**********:|*|||||||||* miRNA: 3' CU-------------UGG----------GC-GACGUCUCCU 5'
lcr-miR-N149	XM_019253881.2	gene-acsf3	ACSF3	acyl-CoA synthetase family member 3, transcript variant X2	149	171	167	-28.9	miRNA: 3' uccuacUUG-GGCGACGUCUCCu 5' |**|**|||*|:||||||||||| target: 5' atcacaAACACTGCTGCAGAGGa 3'	133	154	-38.2	0.00015	target: 5' AACACCUCCCAUCACAAACACUGCUGCAGAGGAA 3' |**|||:***************|||||||||||* miRNA: 3' U--UGGG---------------CGACGUCUCCU- 5'
lcr-miR-N228	XM_027289786.1	gene-stard13	STARD13	StAR related lipid transfer domain containing 13, transcript variant X1	1735	1756	164	-32.99	miRNA: 3' ugACUCCUCGAUACUGGUUCAg 5' :|||||*||||:*|||||:||| target: 5' gcTGAGTAGCTGAGACCAGGTc 3'	1733	1754	-36.4	0.000776	target: 5' GUAGCUGAGACCAGGUCU 3' |*||||:*|||||:|||* miRNA: 3' CCUCGAUACUGGUUCAG- 5'
lcr-miR-N228	XM_010739929.3	gene-LOC104926138	TLR5S	toll-like receptor 5	31	52	172	-24.45	miRNA: 3' ugacucCUCGAUACUGGUUCAg 5' *:****||*||||||||||||: target: 5' ttctctGATCTATGACCAAGTt 3'	34	55	-27.7	0.002508	target: 5' ---CUAUGACCAAGUUA 3' ***||||||||||||:* miRNA: 3' CUCGAUACUGGUUCAG- 5'
lcr-miR-N228	XM_010737876.3	gene-LOC104924511	TIMP3	metalloproteinase inhibitor 3	1508	1529	165	-24.87	miRNA: 3' ugacuCCUCGAUACUGGUUCAg 5' |****|*:|||*|||||||||: target: 5' aaactGTGGCTTTGACCAAGTt 3'	1495	1516	-34.9	0.002734	target: 5' GGACACAAACUGUGGCUUUGACCAAGUUA 3' |||***********|||*|||||||||:* miRNA: 3' CCU-----------CGAUACUGGUUCAG- 5'
lcr-miR-N229	XM_027289786.1	gene-stard13	STARD13	StAR related lipid transfer domain containing 13, transcript variant X1	1735	1756	164	-32.99	miRNA: 3' ugACUCCUCGAUACUGGUUCAg 5' :|||||*||||:*|||||:||| target: 5' gcTGAGTAGCTGAGACCAGGTc 3'	1733	1754	-36.4	0.000776	target: 5' GUAGCUGAGACCAGGUCU 3' |*||||:*|||||:|||* miRNA: 3' CCUCGAUACUGGUUCAG- 5'
lcr-miR-N229	XM_010739929.3	gene-LOC104926138	TLR5S	toll-like receptor 5	31	52	172	-24.45	miRNA: 3' ugacucCUCGAUACUGGUUCAg 5' *:****||*||||||||||||: target: 5' ttctctGATCTATGACCAAGTt 3'	34	55	-27.7	0.002508	target: 5' ---CUAUGACCAAGUUA 3' ***||||||||||||:* miRNA: 3' CUCGAUACUGGUUCAG- 5'
lcr-miR-N229	XM_010737876.3	gene-LOC104924511	TIMP3	metalloproteinase inhibitor 3	1508	1529	165	-24.87	miRNA: 3' ugacuCCUCGAUACUGGUUCAg 5' |****|*:|||*|||||||||: target: 5' aaactGTGGCTTTGACCAAGTt 3'	1495	1516	-34.9	0.002734	target: 5' GGACACAAACUGUGGCUUUGACCAAGUUA 3' |||***********|||*|||||||||:* miRNA: 3' CCU-----------CGAUACUGGUUCAG- 5'
lcr-miR-N312	XM_010733368.3	gene-LOC104920956	PLVAPA	plasmalemma vesicle-associated protein-like, transcript variant X2	161	183	175	-24.47	miRNA: 3' uuUGGUAGC-UGGCAACUAACAu 5' *||||||:|*||:*||||||||| target: 5' taACCATTGCACTTTTGATTGTa 3'	161	182	-27.6	0.003172	target: 5' UUGCACUUUUGAUUGUAA 3' |:|*||:*|||||||||* miRNA: 3' AGC-UGGCAACUAACAU- 5'
lcr-miR-N434	XM_019262301.2	gene-LOC104929675	CBARP	voltage-dependent calcium channel beta subunit-associated regulatory protein, transcript variant X1	915	933	167	-27.87	miRNA: 3' gcuCUUGGUCGUCUGACUCu 5' ***|||||||:*|||||||| target: 5' gatGAACCAGT-GACTGAGa 3'	914	933	-32.2	0.008743	target: 5' ACCAGU-GACUGAGAG 3' |||||:*||||||||* miRNA: 3' UGGUCGUCUGACUCU- 5'
lcr-miR-N434	XM_027273901.1	gene-LOC104919726	MYO1C	unconventional myosin-Ic, transcript variant X1	374	393	166	-27.98	miRNA: 3' gcucuuGGUCGUCUGACUCu 5' **|*:*||||:||||||||: target: 5' gaaagtCCAGTAGACTGAGg 3'	371	390	-34.1	0.000201	target: 5' AGUCCAGUAGACUGAGGG 3' ***||||:||||||||:* miRNA: 3' ---GGUCGUCUGACUCU- 5'
lcr-miR-N501	XM_019262301.2	gene-LOC104929675	CBARP	voltage-dependent calcium channel beta subunit-associated regulatory protein, transcript variant X1	915	933	167	-27.87	miRNA: 3' gcuCUUGGUCGUCUGACUCu 5' ***|||||||:*|||||||| target: 5' gatGAACCAGT-GACTGAGa 3'	914	933	-32.2	0.008743	target: 5' ACCAGU-GACUGAGAG 3' |||||:*||||||||* miRNA: 3' UGGUCGUCUGACUCU- 5'
lcr-miR-N501	XM_027273901.1	gene-LOC104919726	MYO1C	unconventional myosin-Ic, transcript variant X1	374	393	166	-27.98	miRNA: 3' gcucuuGGUCGUCUGACUCu 5' **|*:*||||:||||||||: target: 5' gaaagtCCAGTAGACTGAGg 3'	371	390	-34.1	0.000201	target: 5' AGUCCAGUAGACUGAGGG 3' ***||||:||||||||:* miRNA: 3' ---GGUCGUCUGACUCU- 5'
lcr-miR-N508	XM_019273127.2	gene-ppp4r3a	PPP4R3A	protein phosphatase 4 regulatory subunit 3A, transcript variant X3	836	861	163	-28.5	miRNA: 3' acUCUGUGCGGAG----ACAAGUCCu 5' **||||*:||||:****||||||||| target: 5' aaAGACCTGCCTTTAAATGTTCAGGa 3'	837	858	-31.9	0.003032	target: 5' CUGCCUUUAAAUGUUCAGGAC 3' *:||||:****|||||||||* miRNA: 3' UGCGGAG----ACAAGUCCU- 5'
lcr-miR-N508	XM_027279168.1	gene-LOC104932906	ACIN1	apoptotic chromatin condensation inducer in the nucleus	107	129	165	-26.64	miRNA: 3' acucUGUGCGGAG-ACAAGUCCu 5' |***||*||||||**|||||||| target: 5' ttccACTCGCCTCAAGTTCAGGa 3'	100	121	-30.6	0.00395	target: 5' UUUCCACUCGCCUCAAGUUCAGGAC 3' *****||*||||||**||||||||* miRNA: 3' -----UGUGCGGAGA-CAAGUCCU- 5'
lcr-miR-N508	XM_027289233.1	gene-ascc1	ASCC1	activating signal cointegrator 1 complex subunit 1, transcript variant X1	536	557	161	-28.9	miRNA: 3' acUCUGUGCGGAGA-CAAGUCCu 5' **|||*:||*:|||*|||||||| target: 5' acAGAGGCG-TTCTCGTTCAGGa 3'	537	558	-29.7	0.004146	target: 5' GCGUUCUC-GUUCAGGAG 3' :||*:|||*||||||||* miRNA: 3' UGC-GGAGACAAGUCCU- 5'
lcr-miR-N508	XM_027277152.1	gene-ankfn1	ANKFN1	ankyrin repeat and fibronectin type III domain containing 1, transcript variant X3	217	237	166	-26.2	miRNA: 3' acUCUGUGCGGAGACAAGUCCu 5' **||||*|||:*|*|||||||| target: 5' ccAGAC-CGCTGCGGTTCAGGa 3'	218	239	-30	0.007167	target: 5' -CGCUGCGGUUCAGGAU 3' *|||:*|*||||||||* miRNA: 3' UGCGGAGACAAGUCCU- 5'
lcr-miR-N508	XM_027277153.1	gene-ankfn1	ANKFN1	ankyrin repeat and fibronectin type III domain containing 1, transcript variant X3	217	237	166	-26.2	miRNA: 3' acUCUGUGCGGAGACAAGUCCu 5' **||||*|||:*|*|||||||| target: 5' ccAGAC-CGCTGCGGTTCAGGa 3'	218	239	-30	0.007167	target: 5' -CGCUGCGGUUCAGGAU 3' *|||:*|*||||||||* miRNA: 3' UGCGGAGACAAGUCCU- 5'
oni-miR-194b	XM_010738293.3	gene-LOC104924828	TICAM1	TIR domain-containing adapter molecule 1, transcript variant X2	331	355	170	-25.52	miRNA: 3' agGU-AUACCUC--UACGACAAUGu 5' **||*||*||||**||||||||||| target: 5' ggCACTAGGGAGCAATGCTGTTACa 3'	334	355	-28.9	0.007446	target: 5' -GGAGCAAUGCUGUUACAC 3' *||||**|||||||||||* miRNA: 3' ACCUC--UACGACAAUGU- 5'

## Sheet: Sheet2
rna	XM_027281103.1
rna	XM_027291409.1
rna	XM_027285137.1
rna	XM_027285137.1
rna	XM_027291409.1
rna	XM_027281103.1
rna	XM_027274690.1
rna	XM_019273906.2
rna	XM_019253881.2
rna	XM_019264785.2
rna	XM_019268772.2
rna	XM_019273906.2
rna	XM_019253881.2
rna	XM_027274690.1
rna	XM_019264785.2
rna	XM_019268772.2
rna	XM_010739929.3
rna	XM_027289786.1
rna	XM_010737876.3
rna	XM_010737876.3
rna	XM_027289786.1
rna	XM_010739929.3
rna	XM_010733368.3
rna	XM_019262301.2
rna	XM_027273901.1
rna	XM_019262301.2
rna	XM_027273901.1
rna	XM_027279168.1
rna	XM_027289233.1
rna	XM_027277152.1
rna	XM_019273127.2
rna	XM_027277153.1
rna	XM_010737356.3
rna	XM_010738293.3
