# Supplementary material for: Comparative Transcriptomics Reveals the microRNA-Mediated Immune Response of Large Yellow Croaker (Larimichthys crocea) to Pseudomonas plecoglossicida Infection
Source: MDPI journal article supplement (doi:10.3390/fishes8010010), 2022-12-23
Supplement: s1 [file s1 › Table S18.xlsx]

## Sheet: Sheet1
Table S18 Pairs of DEmiRNA-DEmRNA at 24 h
miRNA name	Target transcript ID	Target gene ID	Target gene name	Target gene description	start_miranda	end_miranda	score_miranda	energy_miranda	paired_miranda	start_rnahybrid	end_rnahybrid	energy_rnahybrid	pvalue_rnahybrid	paired_rnahybrid
dre-miR-216b	XM_010751423.3	gene-trip11	TRIP11	thyroid hormone receptor interactor 11	624	647	175	-26.03	miRNA: 3' agUGUCAACGGACG--UCUCUAAu 5' **:||||*||||||**|||||||* target: 5' caGCAGTAGCCTGCGTAGAGATTt 3'	625	646	-31.6	0.0045	target: 5' UAGCCUGCGUAGAGAUUU 3' |*||||||**|||||||* miRNA: 3' AACGGACG--UCUCUAAU 5'
dre-miR-217	XM_019263541.2	gene-slc39a14	SLC39A14	solute carrier family 39 member 14, transcript variant X2	196	218	168	-27.74	miRNA: 3' gguuaGUCAA-GGACUACGUCAu 5' *|:**|||||*||*||||||||| target: 5' acgcgCAGTTCCCAGATGCAGTa 3'	196	217	-32.4	0.007679	target: 5' AGUUCCCAGAUGCAGUAA 3' ||||||**|||||||||* miRNA: 3' UCAAGGA-CUACGUCAU- 5'
oni-miR-725	XM_010749444.3	gene-LOC104933900	CHIA	acidic mammalian chitinase-like	203	228	161	-22.08	miRNA: 3' ugCUGG--U-CUUUGU-UACUGACUu 5' |:||||**|*|||*||*||||||||* target: 5' atGACCTGATGAATCATATGACTGAt 3'	202	223	-26.3	0.008264	target: 5' CUGAUGAAUCAUAUGACUGAU 3' |****|||*||*||||||||* miRNA: 3' GU---CUUUGU-UACUGACUU 5'
oni-miR-725	XM_027281859.1	gene-LOC104932419	ZNF774	zinc finger protein 774, transcript variant X3	37	57	166	-23.6	miRNA: 3' ugCUGGUCUUUGUUACUGACUu 5' |*|||::|||:*|*|||||||| target: 5' aaGACTGGAAG-ACTGACTGAa 3'	283	304	-26.9	0.009882	target: 5' GGAAGAC-UGACUGAAG 3' :|||:***||||||||* miRNA: 3' UCUUUGUUACUGACUU- 5'
dre-miR-183-5p	XM_027278347.1	gene-LOC104930980	PIGR	polymeric immunoglobulin receptor, transcript variant X6	131	153	161	-23.51	miRNA: 3' guCACUUAAGAUGGUCACGGUAu 5' *||||||*|:|||**||||:||: target: 5' aaGTGAAATTTACATGTGCTATg 3'	131	153	-25.8	0.006074	target: 5' AAUUUACAUGUGCUAUGC 3' |*|:|||**||||:||:* miRNA: 3' UAAGAUGGUCACGGUAU- 5'
oni-miR-725	XM_019275039.2	gene-LOC104928537	NT5	5'-nucleotidase	25	46	171	-20.05	miRNA: 3' ugcUGGUCUUUGUUACUGACUu 5' ***||:*|||:*|||||||||| target: 5' tgaACTTGAAGAAATGACTGAa 3'	16	37	-25.8	0.00333	target: 5' AUGUGAACUUGAAGAAAUGACUGAAA 3' **********|||:*||||||||||* miRNA: 3' GU--------CUUUGUUACUGACUU- 5'
ssa-miR-7132a-5p	XM_010737876.3	gene-LOC104924511	TIMP3	metalloproteinase inhibitor 3	1508	1529	173	-28.39	miRNA: 3' ugacuCCUCGAAACUGGUUCAg 5' |****|*:|||||||||||||: target: 5' aaactGTGGCTTTGACCAAGTt 3'	1495	1516	-38.5	0.000531	target: 5' GGACACAAACUGUGGCUUUGACCAAGUUA 3' |||***********|||||||||||||:* miRNA: 3' CCU-----------CGAAACUGGUUCAG- 5'
dre-miR-183-5p	XM_019259896.2	gene-LOC104919295	PRKD3	serine/threonine-protein kinase D3, transcript variant X1	957	979	181	-27.93	miRNA: 3' guCACUUAAGAUGGUCACGGUAu 5' :*|||||||:**:|||||||||: target: 5' ttGTGAATTTGTTCAGTGCCATg 3'	958	980	-31.8	0.005282	target: 5' AUUUGUUCAGUGCCAUGA 3' |||:**:|||||||||:* miRNA: 3' UAAGAUGGUCACGGUAU- 5'
dre-miR-196a-5p	XM_010747436.3	gene-hoxc8	HOXC8	homeobox C8	1009	1029	162	-29.05	miRNA: 3' ggGUUGUUGUACUUUGAUGGAu 5' |||||||||*|*|||||:|||| target: 5' ccCAACAAC-TAAAACTGCCTa 3'	1007	1028	-32.1	0.008297	target: 5' CAACUA-AAACUGCCUAU 3' ||||***|||||:||||* miRNA: 3' GUUGUACUUUGAUGGAU- 5'
lcr-miR-N201	XM_027289312.1	gene-dnmbp	DNMBP	dynamin binding protein, transcript variant X1	45	62	160	-23.84	miRNA: 3' acagucUUCCUCCGAGAg 5' **|:**|||||||||||| target: 5' ctttttAAGGAGGCTCTc 3'	38	55	-28.7	0.008795	target: 5' ACCUUUUUAAGGAGGCUCUCA 3' |********|||||||||||* miRNA: 3' U--------UCCUCCGAGAG- 5'
lcr-miR-N201	XM_019264785.2	gene-dnmbp	DNMBP	dynamin binding protein, transcript variant X1	45	62	160	-23.84	miRNA: 3' acagucUUCCUCCGAGAg 5' **|:**|||||||||||| target: 5' ctttttAAGGAGGCTCTc 3'	38	55	-28.7	0.008795	target: 5' ACCUUUUUAAGGAGGCUCUCA 3' |********|||||||||||* miRNA: 3' U--------UCCUCCGAGAG- 5'
oni-miR-734	XM_027279219.1	gene-arhgap9	ARHGAP9	Rho GTPase activating protein 9, transcript variant X5	48	70	175	-25.96	miRNA: 3' cuCGUGUU-AAGACGUCGUAAAu 5' *|||||||*|**||||||||||: target: 5' aaGCACAAGTAGTGCAGCATTTg 3'	48	69	-30.1	0.006301	target: 5' AAGUAGUGCAGCAUUUGU 3' ||*|**||||||||||:* miRNA: 3' UUAAG-ACGUCGUAAAU- 5'
oni-miR-734	XM_027279217.1	gene-arhgap9	ARHGAP9	Rho GTPase activating protein 9, transcript variant X5	48	70	175	-25.96	miRNA: 3' cuCGUGUU-AAGACGUCGUAAAu 5' *|||||||*|**||||||||||: target: 5' aaGCACAAGTAGTGCAGCATTTg 3'	48	69	-30.1	0.006301	target: 5' AAGUAGUGCAGCAUUUGU 3' ||*|**||||||||||:* miRNA: 3' UUAAG-ACGUCGUAAAU- 5'
